# Supplementary material for: EPHA7 mutation as a predictive biomarker for immune checkpoint inhibitors in multiple cancers
Source: PubMed Central journal article supplement (PMC7852135; doi:10.1186/s12916-020-01899-x), 2021-02-02
Supplement: 12916_2020_1899_MOESM4_ESM.pdf [file 12916_2020_1899_MOESM4_ESM.pdf]

**A**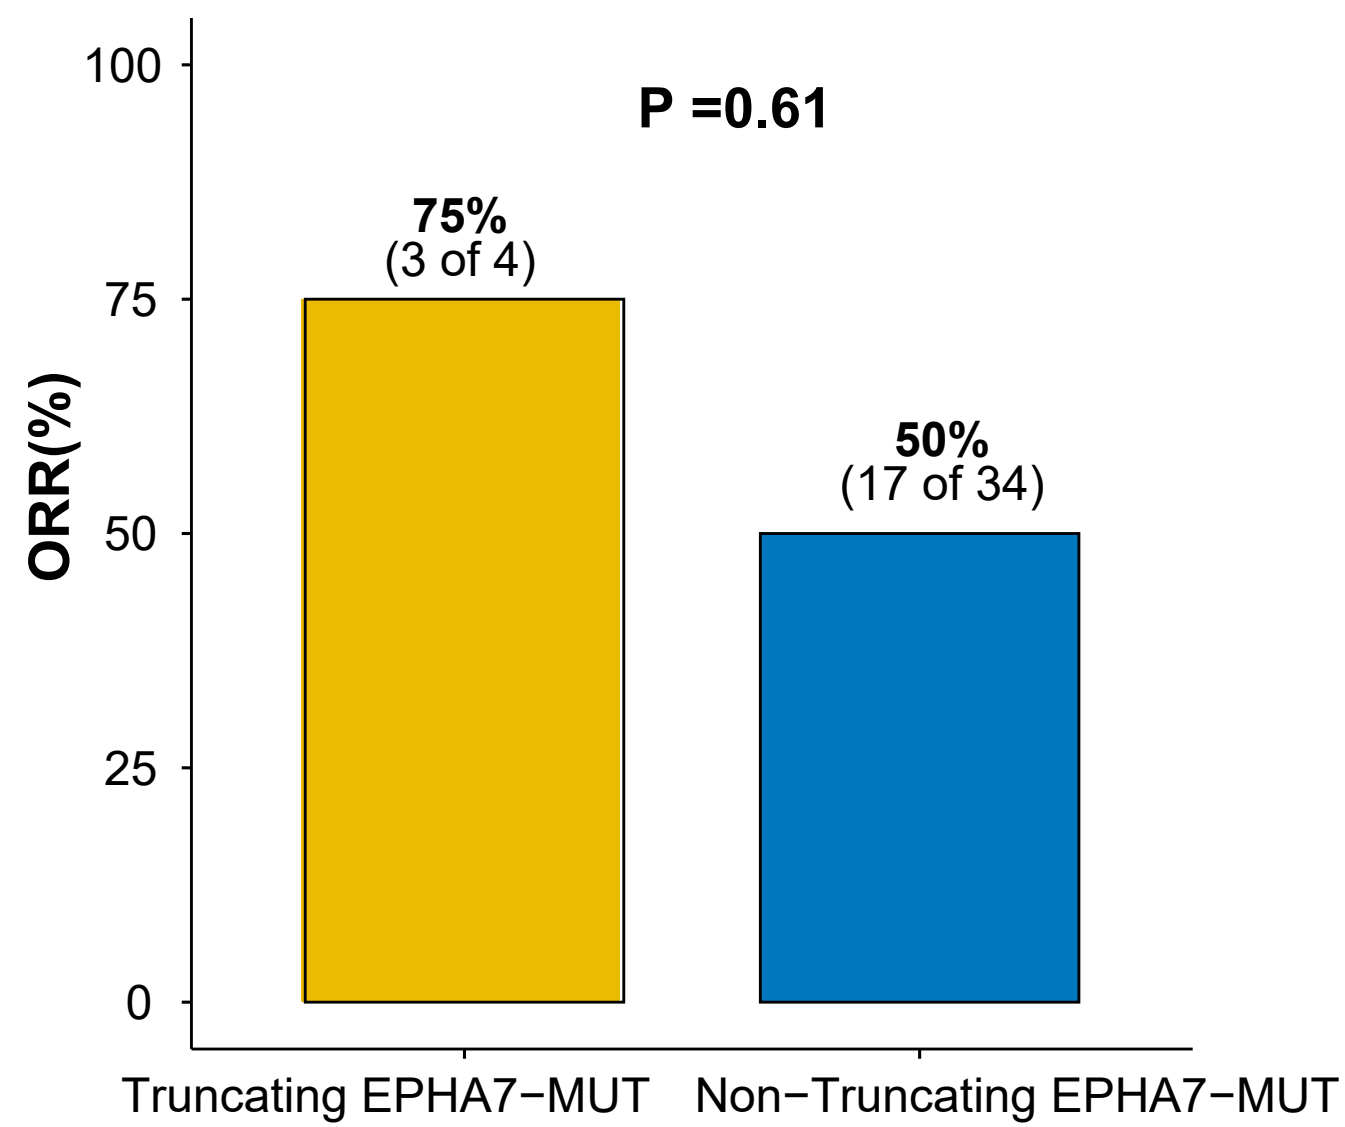**B**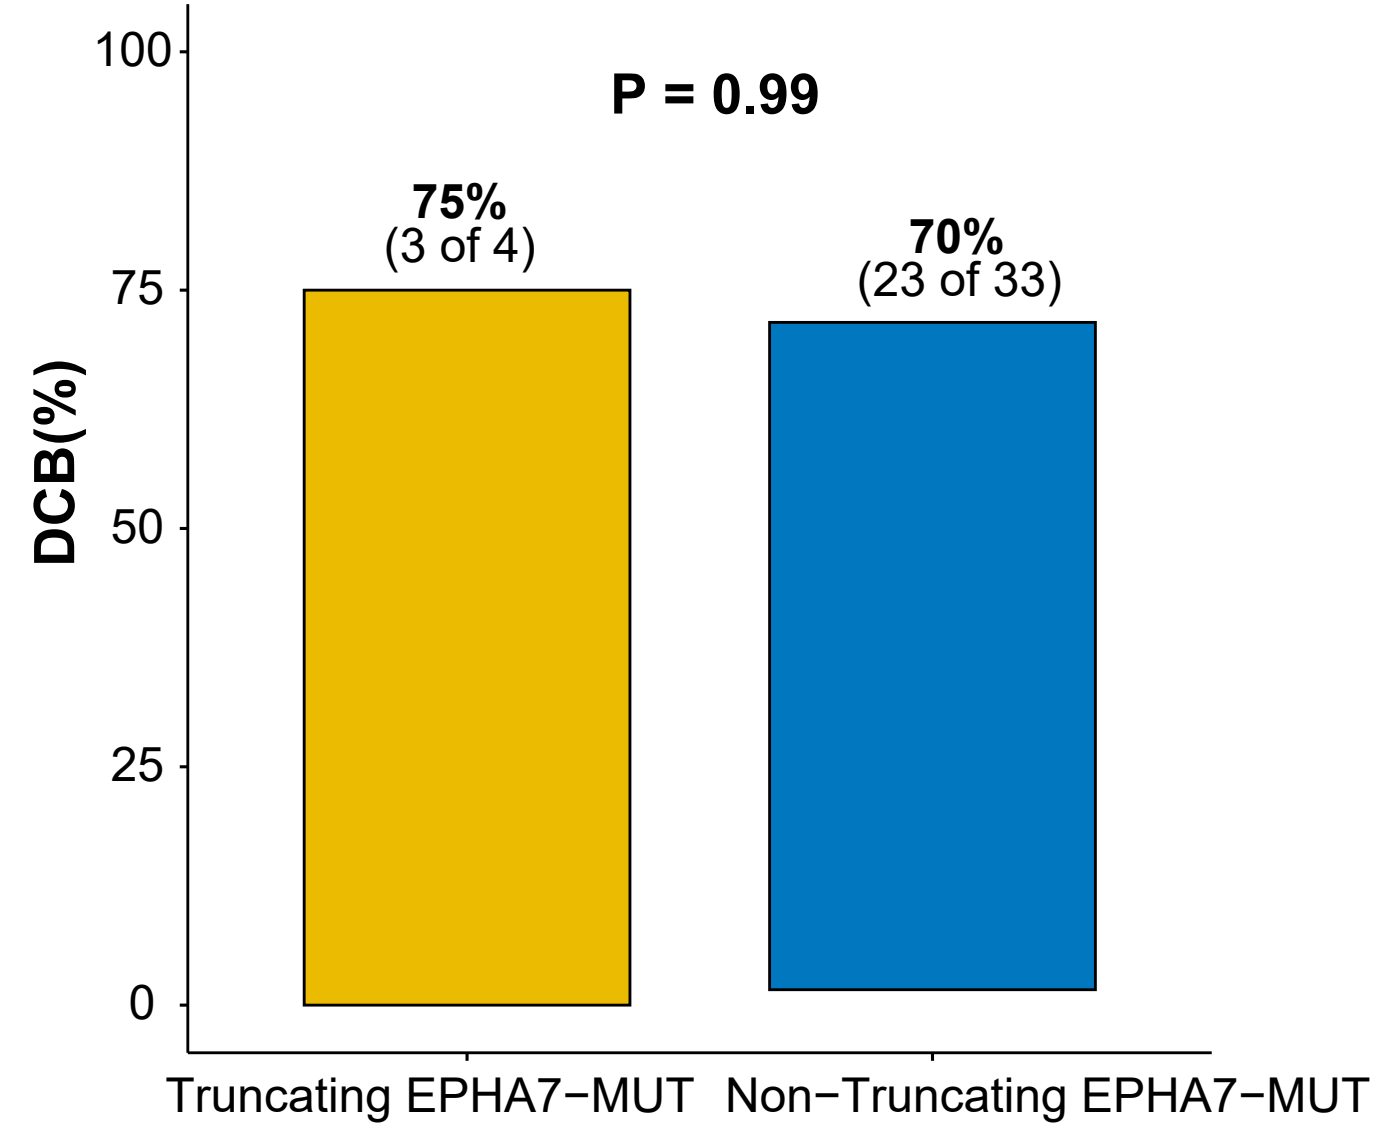**C**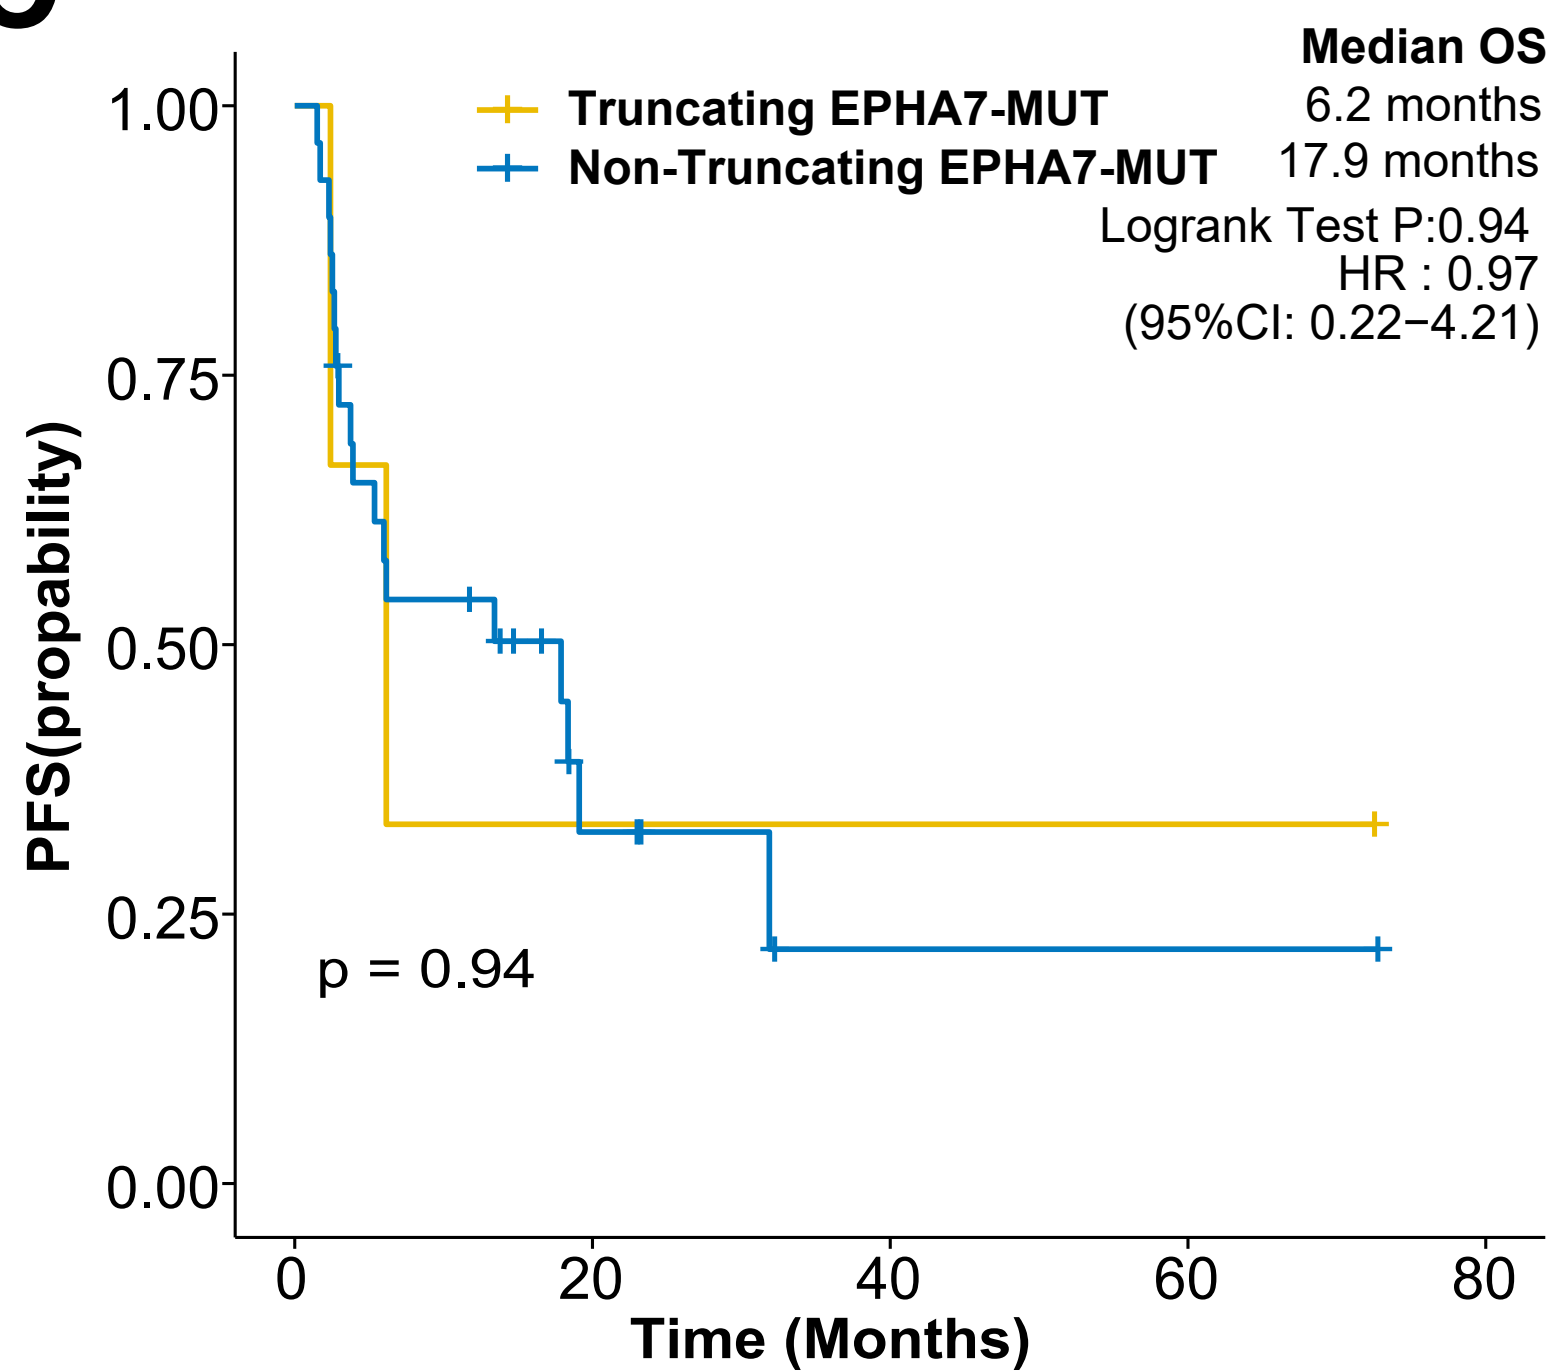**D**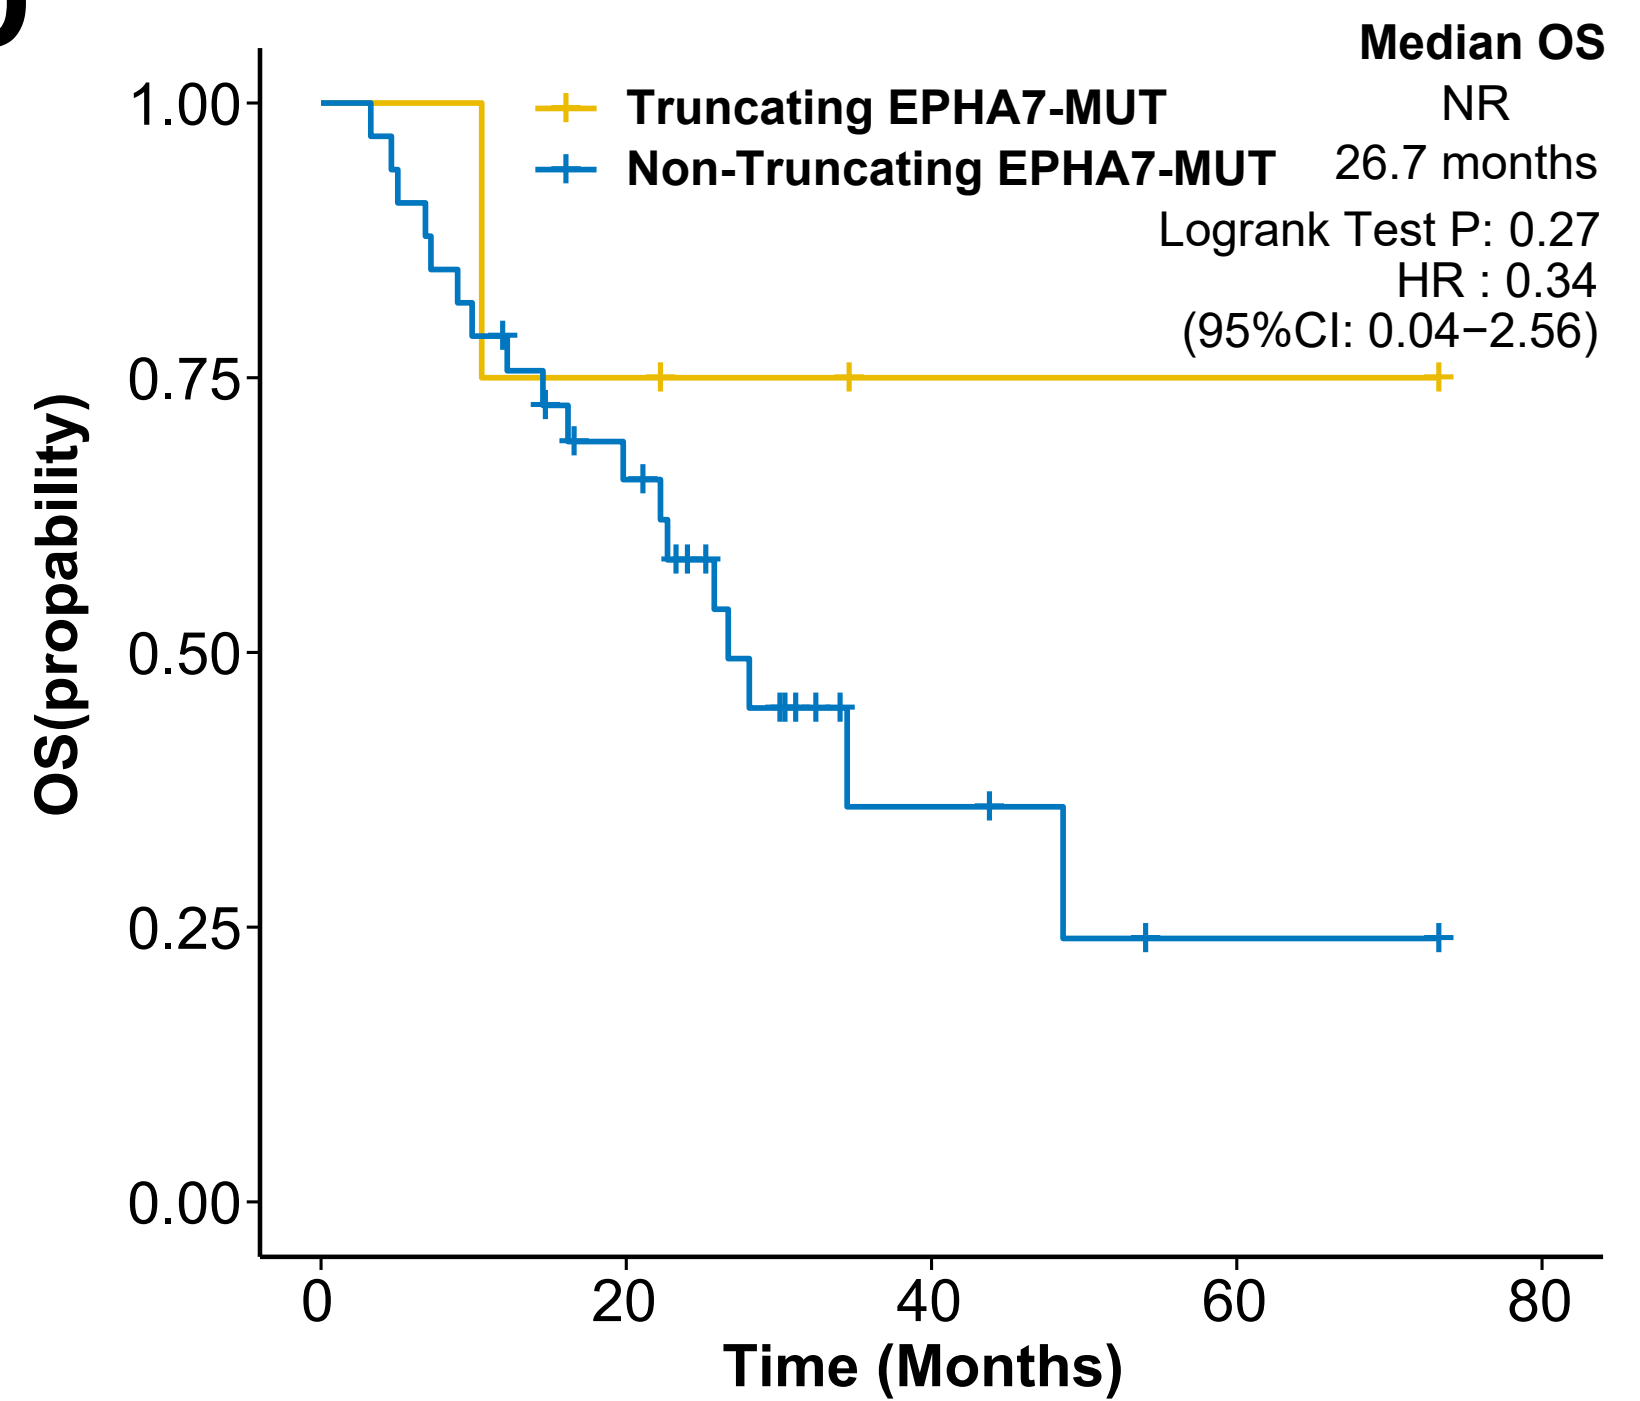**E**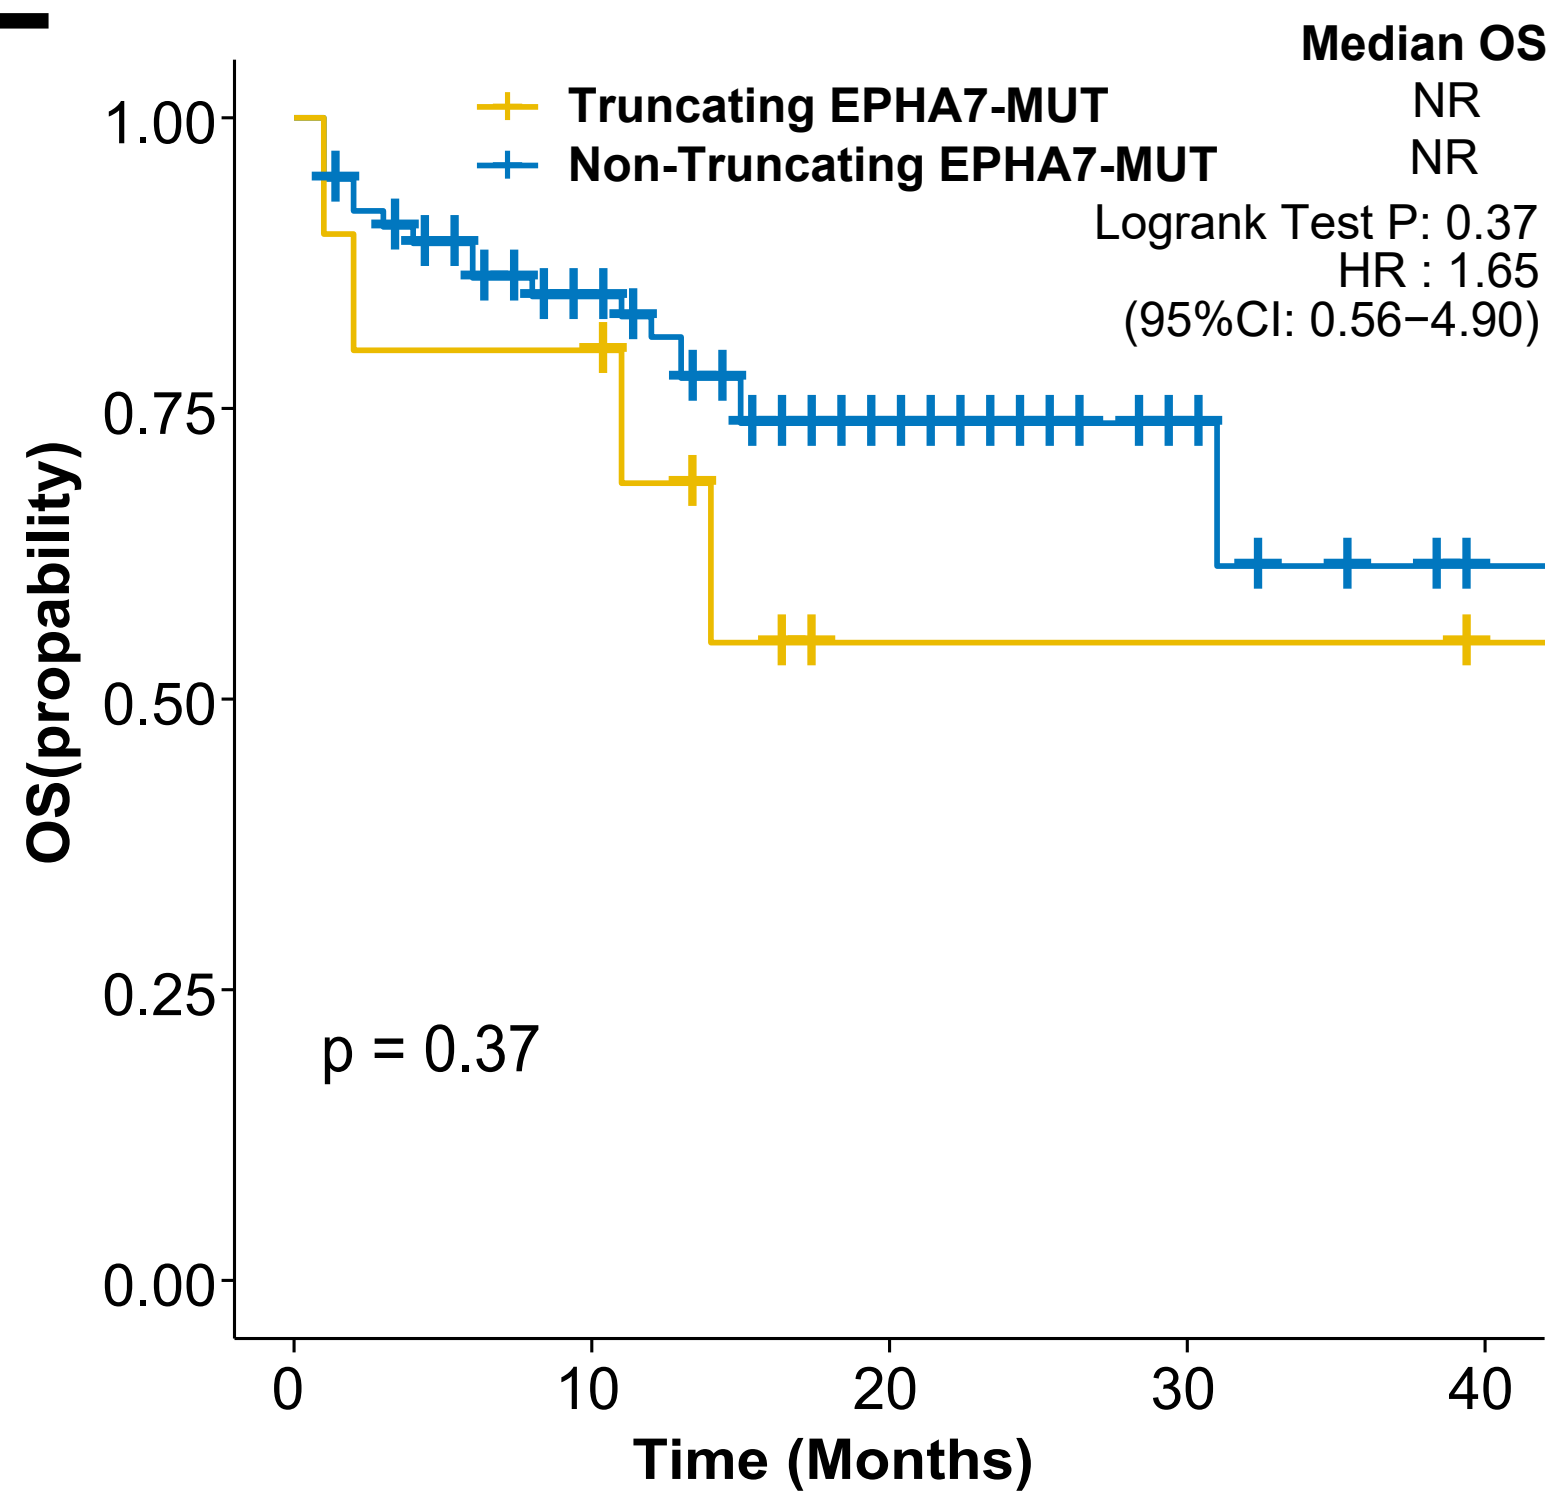**F**

| No. of patients in Discovery cohort  |                         |
|--------------------------------------|-------------------------|
| Truncating EPHA7-MUT                 | NonTruncating EPHA7-MUT |
| 4                                    | 34                      |
| No. of patients in Validation cohort |                         |
| Truncating EPHA7-MUT                 | NonTruncating EPHA7-MUT |
| 10                                   | 73                      |
