# Supplementary material for: EPHA7 mutation as a predictive biomarker for immune checkpoint inhibitors in multiple cancers
Source: PubMed Central journal article supplement (PMC7852135; doi:10.1186/s12916-020-01899-x), 2021-02-02

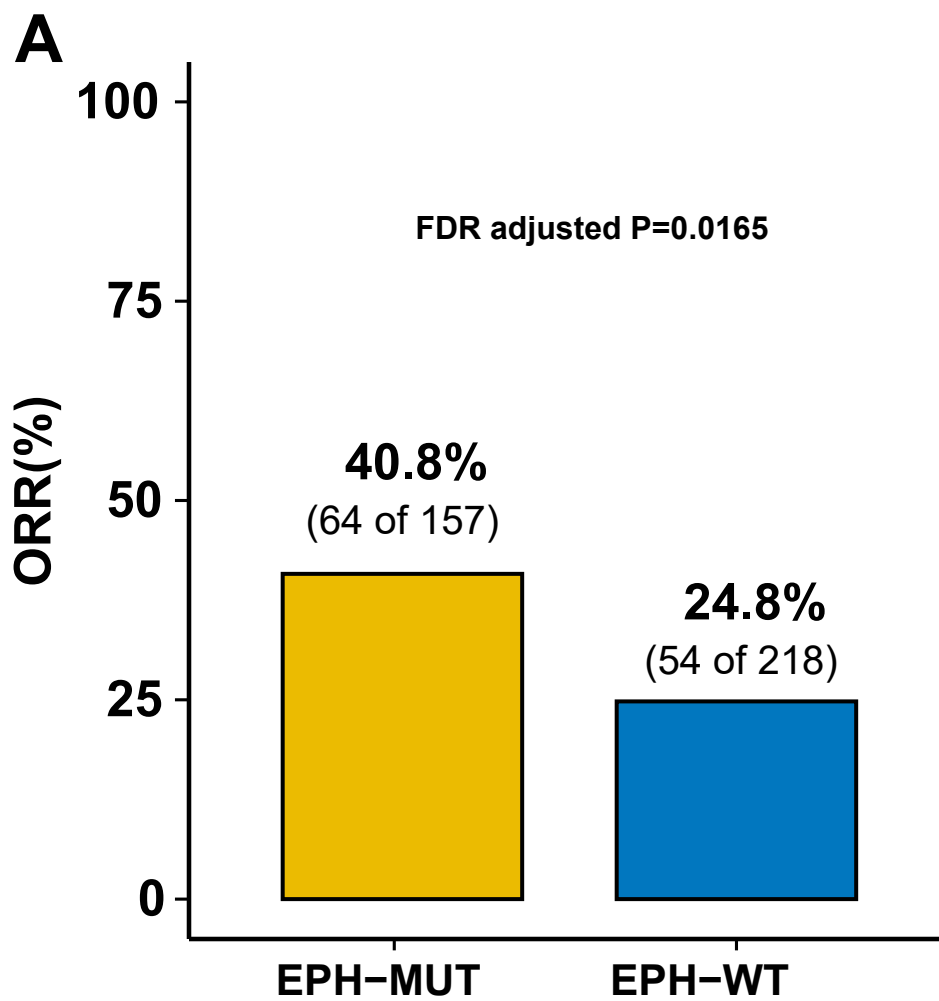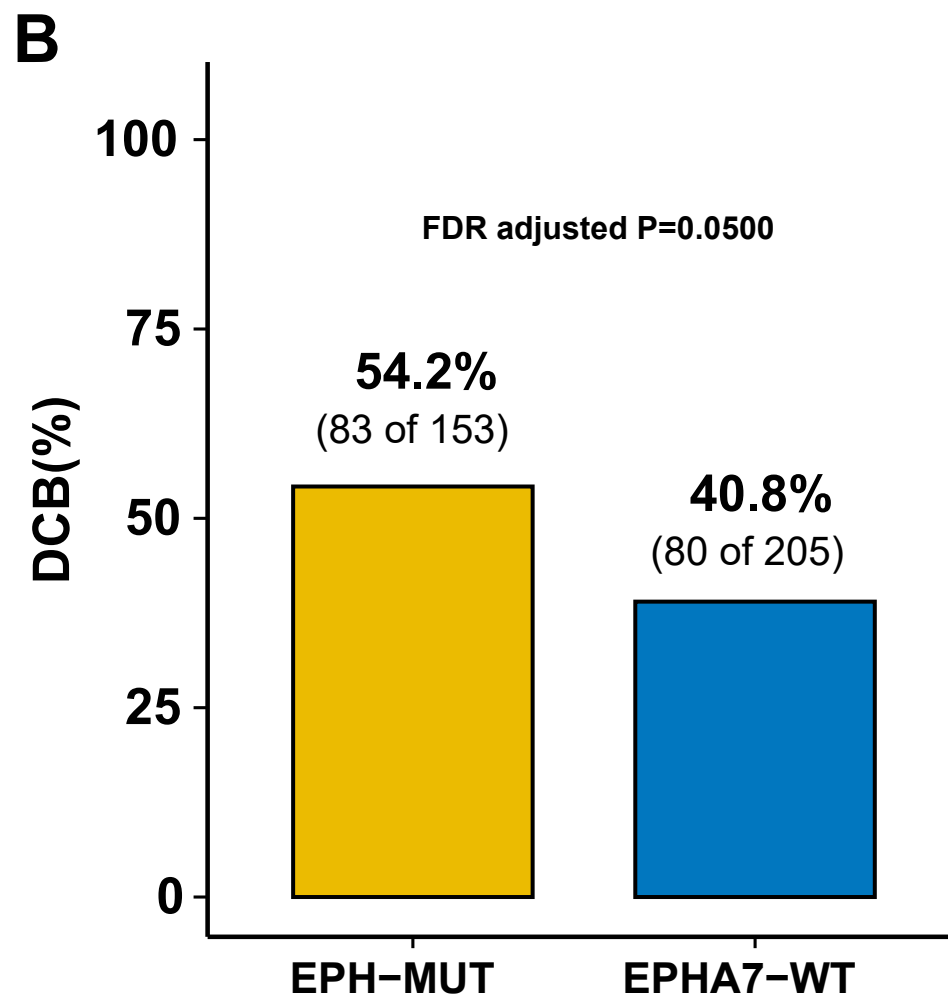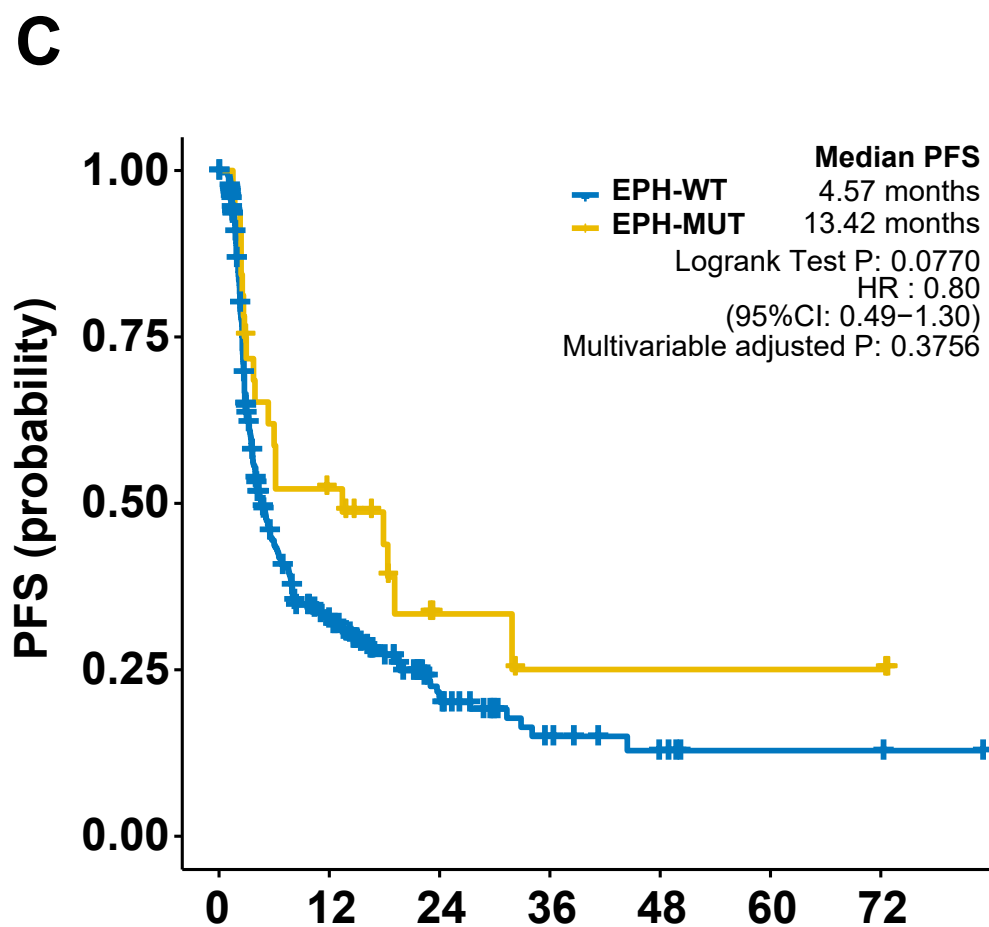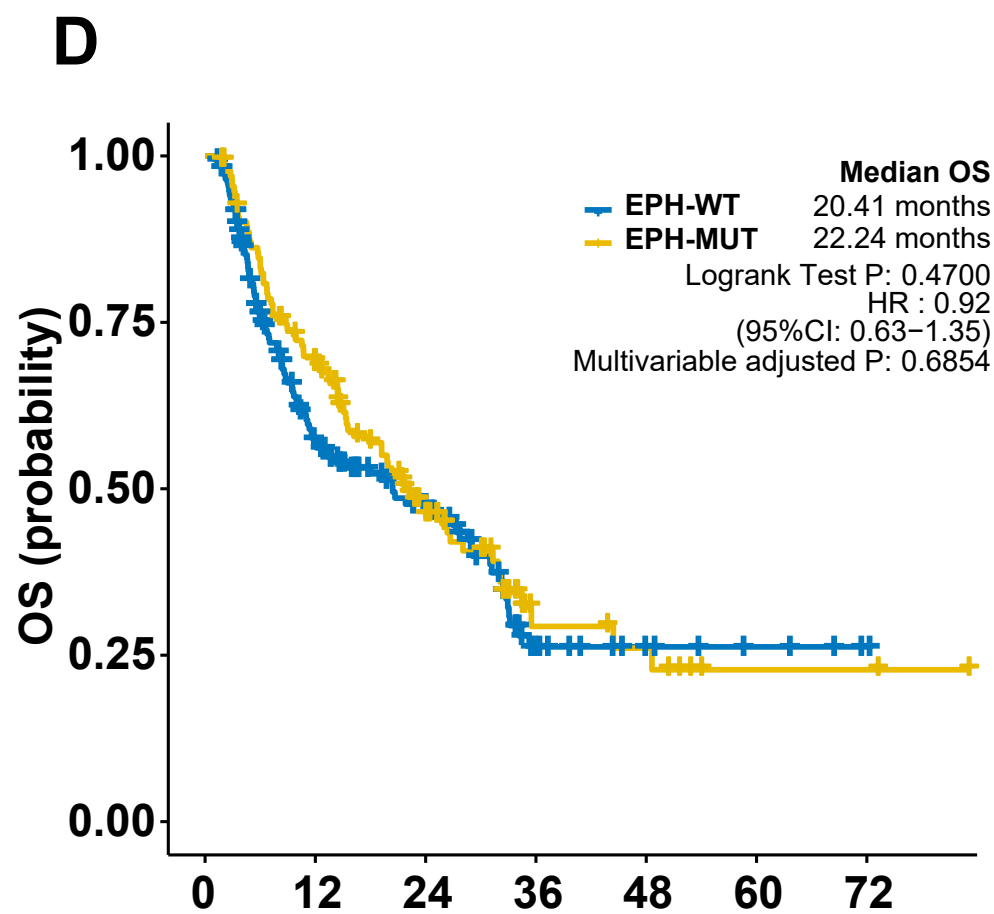

Supplement: 12916_2020_1899_MOESM9_ESM.pdf [file 12916_2020_1899_MOESM9_ESM.pdf]
