# Supplementary material for: EPHA7 mutation as a predictive biomarker for immune checkpoint inhibitors in multiple cancers
Source: BMC Med. 2021 Feb 2;19:26. doi: 10.1186/s12916-020-01899-x (PMC7852135; doi:10.1186/s12916-020-01899-x)
Supplement: Supplementary file 5 — Additional file 5: Table S3. Results of CIBERSORT analysis in TCGA cohort. [file 12916_2020_1899_MOESM5_ESM.xlsx]

## Sheet: CIBERSORT_results
Input Sample	group	B cells naive	B cells memory	Plasma cells	T cells CD8	T cells CD4 naive	T cells CD4 memory resting	T cells CD4 memory activated	T cells follicular helper	T cells regulatory (Tregs)	T cells gamma delta	NK cells resting	NK cells activated	Monocytes	Macrophages M0	Macrophages M1	Macrophages M2	Dendritic cells resting	Dendritic cells activated	Mast cells resting	Mast cells activated	Eosinophils	Neutrophils	P-value	Pearson Correlation	RMSE
TCGA.CC.A3MA.01	EPHA7-WT	0.048537	0	0.0101592	0.0660174	0	0	0	0.0334151	0.0075606	0	0.0128801	0	0	0.451987	0.0638155	0.27989	0	0	0.0189381	0	0	0.00679932	0	0.700244	0.723226
TCGA.IQ.A61O.01	EPHA7-WT	0	0.00864807	0.00888987	0.0321362	0	0.00786251	0	0.0424345	0.0216064	0	0	0.00297624	0	0.388611	0.036619	0.412693	0	0	0	0.0375227	0	0	0	0.705351	0.71655
TCGA.GS.A9TT.01	EPHA7-WT	0.141079	0.484038	0	0.0165248	0	0.0338023	0.0626692	0.0309887	0	0	0.0197523	0	0	0.139404	0.0236615	0.0400054	0	0	0.00590373	0	0	0.00217103	0	0.646412	0.762905
TCGA.CV.6933.01	EPHA7-WT	0.00957519	0	0.00595194	0.00973558	0	0.0441853	0	0.0126379	0.00571722	0	0.0343022	0	0.0167257	0.669223	0.00325663	0.174063	0	0.00461753	0	0.0100083	0	0	0	0.784444	0.626335
TCGA.IQ.7631.01	EPHA7-WT	0	0	0.0305684	0.0285269	0.00356055	0.00991036	0	0.0249156	0.0253769	0	0.071675	0	0	0.601512	0.012981	0.143457	0	0	0	0.0475166	0	0	0	0.737318	0.682352
TCGA.N8.A4PI.01	EPHA7-WT	0	0.0108022	0	0	0.0279431	0	0	0.0455154	0.00216609	0.0529601	0.00321695	0.0114531	0	0.45376	0.0005	0.391663	0	0	0	0	0	0	0	0.725841	0.695081
TCGA.N8.A4PL.01	EPHA7-WT	0.00292036	0	0	0.00532189	0	0	0	0.0888348	0.0373671	0.0134244	0	0	0.0119666	0.572957	0.0378191	0.14311	0	0	0	0.0862788	0	0	0	0.71363	0.704999
TCGA.LA.A7SW.01	EPHA7-WT	0	0.022173	0.0100377	0.0111359	0.0676603	0	0.0525494	0.00142436	0	0	0.0433517	0	0	0.344022	0	0.313563	0	0.0521968	0	0.0553335	0	0.0265525	0	0.676271	0.750785
TCGA.CN.4737.01	EPHA7-WT	0	0.00774561	0.0117663	0.0132719	0	0	0	0.0806303	0.00267518	0	0.0171467	0	0	0.539444	0	0.279665	0	0.0365818	0.00144313	0.00963024	0	0	0	0.738442	0.681211
TCGA.D3.A3MO.06	EPHA7-WT	0	0.0117868	0	0	0.0109691	0	0	0.0164698	0.0110769	0	0.0374522	0	0	0.84194	0.00199392	0.0683112	0	0	0	0	0	0	0	0.772857	0.637409
TCGA.DK.AA6T.01	EPHA7-WT	0.0698184	0.579083	0	0.0975541	0	0	0.00985588	0.0547991	0.0174949	0	0	0.033274	0.00528808	0	0.0010532	0.0676101	0	0.0513138	0.012855	0	0	0	0	0.622371	0.782192
TCGA.ER.A1A1.06	EPHA7-WT	0.214817	0.270135	0.0548097	0.0622653	0	0.0559012	0.00492208	0.111077	0.0616134	0	0.00510317	0	0.00608747	0.0403181	0.0062035	0.0987021	0	0.00804429	0	0	0	0	0	0.622987	0.782646
TCGA.UF.A71A.01	EPHA7-WT	0	0.00948101	0.0251032	0.0246333	0.0135012	0.151351	0	0	0	0	0.0383243	0	0	0.313086	0.0244973	0.364125	0.00692309	0	0	0.0289741	0	0	0	0.648484	0.771437
TCGA.N5.A59E.01	EPHA7-WT	0	0.0462822	0.0166536	0.101714	0	0	0	0.0634592	0.0395145	0.02082	0	0	0	0.453756	0	0.256712	0	0	0	0.00108812	0	0	0	0.699233	0.727279
TCGA.N5.A4RS.01	EPHA7-WT	0.0006	0.0119983	0	0.0869938	0	0	0	0.102767	0	0	0	0.0691083	0	0.549296	0.0102296	0.147863	0	0	0.0211212	0	0	0	0	0.701637	0.719709
TCGA.NF.A4X2.01	EPHA7-WT	0	0.00543729	0	0.0438462	0	0	0.0768061	0.0297504	0.0110127	0	0.0277413	0	0	0.321192	0	0.475998	0	0	0.00820589	0	0	0	0	0.656261	0.759651
TCGA.BB.A6UO.01	EPHA7-WT	0	0.0279777	0	0.026299	0	0.0564983	0.0105263	0.0327296	0.0332977	0	0.0593425	0.00586069	0	0.401322	0.0334068	0.235243	0.00464076	0	0	0.0656907	0	0.00716519	0	0.701356	0.731191
TCGA.CV.7102.01	EPHA7-WT	0.00782705	0	0	0.0430016	0	0.0838473	0.00749605	0.002913	0	0	0.0389506	0	0.0418145	0.27397	0.104195	0.366534	0.00938387	0	0.0200671	0	0	0	0	0.647194	0.771649
TCGA.AR.A1AN.01	EPHA7-WT	0.0265172	0	0.001823	0.0411337	0	0.0787805	0	0.0452454	0.0117362	0	0	0.0318968	0	0.415118	0.0326535	0.235767	0.0364312	0	0.0428969	0	0	0	0	0.706337	0.727973
TCGA.AC.A7VC.01	EPHA7-WT	0.0102382	0	0	0	0	0.0531749	0	0.0658806	0.00453182	0.0502539	0	0.0184615	0	0.354233	0.0006	0.349388	0.0403812	0	0.0529013	0	0	0	0	0.692747	0.736758
TCGA.AC.A2QJ.01	EPHA7-WT	0	0.0115991	0.00753413	0.0175641	0	0	0	0.0898217	0	0.0125226	0	0.00720191	0.0390648	0.270307	0.0180069	0.505614	0	0	0.020764	0	0	0	0	0.674396	0.746528
TCGA.D3.A2JA.06	EPHA7-WT	0.00100202	0	0.0102712	0.0541511	0	0.117595	0	0.0428909	0.00407472	0	0	0.0264212	0	0.239054	0.0518698	0.42728	0	0	0.0253893	0	0	0	0	0.636558	0.781761
TCGA.AC.A5EH.01	EPHA7-WT	0	0.0166334	0	0.0478241	0	0.03237	0	0.0662404	0.0650759	0	0.038672	0	0	0.293878	0.030954	0.347988	0	0	0.042877	0.0174866	0	0	0	0.65862	0.76896
TCGA.E9.A1N4.01	EPHA7-WT	0.0359667	0.00381609	0	0.0476846	0	0.11235	0	0.0133485	0.00490276	0	0	0	0	0.224209	0.0589963	0.418449	0	0	0.0802765	0	0	0	0	0.632177	0.787047
TCGA.FS.A1ZC.06	EPHA7-WT	0	0.00516908	0	0	0	0	0	0.0580521	0	0.0450854	0.0287397	0	0	0.576112	0	0.260376	0.0176322	0	0	0.0088344	0	0	0	0.729815	0.687108
TCGA.UF.A7JA.01	EPHA7-WT	0.0041282	0.0002	0	0.114664	0	0.0278277	0	0.10827	0.00463794	0	0.0206182	0	0	0.445333	0.00341953	0.144321	0	0.00762818	0	0.111315	0	0.00767012	0	0.701642	0.727696
TCGA.CQ.7072.01	EPHA7-WT	0.00229962	0	0	0.0305712	0.0104914	0	0	0.047077	0.0621876	0	0.0689525	0	0	0.30136	0	0.336585	0.0250014	0.0531179	0	0.0536588	0.00869727	0	0	0.639053	0.778639
TCGA.AN.A0FV.01	EPHA7-WT	0.0472141	0	0.0021607	0.011649	0	0.0025209	0	0.0272598	0.0185375	0	0	0.0187342	0	0.380782	0.0368659	0.356837	0	0	0.0849614	0	0	0.0124767	0	0.671324	0.748917
TCGA.A7.A3IY.01	EPHA7-WT	0.009847	0	0.00126648	0.00347638	0	0.0120836	0	0.0391068	0.0457572	0.00468183	0	0.0406423	0.00634936	0.347979	0.0246569	0.289549	0	0	0	0.174604	0	0	0	0.698046	0.727276
TCGA.BA.6868.01	EPHA7-WT	0.0643439	0	0.0289692	0.0357642	0.0838449	0	0	0.00641312	0	0	0	0.0227147	0	0.522658	0.025813	0.0430547	0	0.111517	0	0.0489055	0	0.00600188	0	0.702374	0.722755
TCGA.AQ.A0Y5.01	EPHA7-WT	0.00311803	0.00620906	0	0	0	0.0892067	0.0034001	0.0203996	0.0322472	0	0.0499404	0.0007	0	0.332247	0.00630037	0.348689	0	0	0.101369	0	0	0.0061596	0	0.676226	0.753149
TCGA.FF.A7CX.01	EPHA7-WT	0.0813723	0.47028	0.0663971	0.114035	0	0	0.0071586	0.0651798	0.00682464	0	0.00159952	0.0170642	0	0.0941692	0.0155948	0.0603252	0	0	0	0	0	0	0	0.652162	0.758052
TCGA.LL.A6FQ.01	EPHA7-WT	0	0.0156474	0.0566133	0.0321459	0	0.0012647	0	0.0775566	0.00800972	0	0	0.0335242	0.0729149	0.282256	0.0285414	0.367592	0	0	0.0223142	0.00161987	0	0	0	0.644796	0.776352
TCGA.EI.6509.01	EPHA7-WT	0	0.0138645	0.00122401	0.0155243	0.0739478	0	0	0.00432358	0.0135247	0	0.048832	0	0	0.594913	0.0047029	0.179107	0	0	0	0.0500364	0	0	0	0.744745	0.674344
TCGA.XF.A9T2.01	EPHA7-WT	0.00479409	0.00165355	0.00427558	0.0293186	0	0	0	0.0606364	0.0541265	0.0146247	0	0.0816866	0	0.340034	0	0.189744	0.0076492	0	0.211456	0	0	0	0	0.648161	0.778166
TCGA.BA.5557.01	EPHA7-WT	0.00359028	0	0	0.0218702	0	0.0247833	0	0.0160083	0.00814233	0	0.00718539	0	0.0003	0.565571	0.00270463	0.0880248	0	0.0182756	0	0.189991	0	0.0535649	0	0.755431	0.661133
TCGA.85.8664.01	EPHA7-WT	0.0969671	0	0.0308776	0.0821024	0	0	0	0.117718	0.0387332	0.0118387	0.0434221	0	0	0.415969	0.0274522	0.115727	0	0	0	0.0191926	0	0	0	0.686539	0.749504
TCGA.CQ.5326.01	EPHA7-WT	0	0.0003	0	0.00396181	0	0.0547539	0	0.0117938	0.00440888	0	0.0323091	0	0	0.344599	0.0146736	0.16441	0	0.0150768	0	0.330284	0	0.0234131	0.001	0.61941	0.784632
TCGA.FS.A1ZD.06	EPHA7-WT	0	0.0146338	0.0073091	0.0987994	0	0.0342236	0	0.0514851	0.0206046	0	0	0.135465	0.0165682	0.342475	0	0.214557	0.00146321	0	0.0624162	0	0	0	0.001	0.616931	0.794946
TCGA.FP.A9TM.01	EPHA7-WT	0.384194	0.227265	0.0686916	0.0225618	0	0.128981	0	0.0581259	0.0004	0	0	0.0101997	0	0.00886261	0.011478	0.0590124	0	0.0041904	0.0160666	0	0	0	0.001	0.614529	0.792135
TCGA.RQ.A6JB.01	EPHA7-WT	0.0281542	0.539598	0	0.0858247	0	0	0.0225705	0.0447165	0.01997	0	0	0.0081211	0	0.0594217	0.054077	0.125386	0	0	0.0121609	0	0	0	0.001	0.621012	0.78442
TCGA.FD.A5BX.01	EPHA7-WT	0.00453508	0.00168717	0	0.0406033	0	0.0277594	0.0115844	0	0	0.0414646	0	0	0.0554029	0.218741	0.0258842	0.516037	0.0303883	0	0	0.025871	0	0	0.001	0.616034	0.789821
TCGA.FA.A6HN.01	EPHA7-WT	0.0640212	0.439067	0.0154506	0.112267	0	0	0.0228326	0.108882	0.0458153	0	0	0	0	0.0260334	0.0424385	0.12082	0	0	0.00237234	0	0	0	0.001	0.620959	0.78593
TCGA.CN.5364.01	EPHA7-MUT	0	0	0	0.0267699	0	0.0417236	0	0.0889128	0.0176644	0	0	0.0300458	0	0.260402	0.0828224	0.360106	0.0616318	0	0.0299206	0	0	0	0.002	0.610012	0.798483
TCGA.CD.8531.01	EPHA7-WT	0	0.423845	0.107376	0.0542778	0	0	0	0.113054	0.00766677	0	0	0.0240834	0	0.0249754	0	0.152788	0.00270207	0.0698674	0.0185984	0	0	0.0008	0.002	0.608058	0.795232
TCGA.IN.7808.01	EPHA7-WT	0.211147	0.284079	0.0268489	0.0715674	0	0.09366	0	0.0581102	0.0509234	0.027802	0	0.037011	0	0.00477511	0.0186501	0.0857016	0	0.00449602	0	0.0252286	0	0	0.003	0.58856	0.807894
TCGA.GR.A4D4.01	EPHA7-WT	0.314377	0.0412179	0.171829	0.0378993	0	0.0542418	0.0113786	0.0766188	0.00853747	0.0157821	0	0	0	0.143505	0.0163946	0.103695	0	0	0.00452286	0	0	0	0.003	0.597695	0.800986
TCGA.GR.7353.01	EPHA7-WT	0.0171985	0.335138	0.128292	0.18166	0	0	0.0441286	0.120345	0.0535079	0.0145593	0	0.00284699	0	0.0165311	0.0210946	0.0619497	0	0	0.00274788	0	0	0	0.003	0.597563	0.801919
TCGA.WA.A7GZ.01	EPHA7-WT	0	0.00628191	0	0.0185441	0.0566599	0.160935	0	0.01423	0	0	0.0322828	0.0087494	0.00739016	0.334373	0.00186017	0.133374	0	0.193501	0.0140245	0.0177935	0	0	0.003	0.575517	0.821065
TCGA.55.6975.01	EPHA7-WT	0.188583	0	0.325266	0.0705739	0	0.0899691	0	0.0535745	0.0207481	0	0.0059106	0	0.0228864	0.00336814	0	0.133955	0	0.0576373	0.0170106	0	0	0.010517	0.003	0.564275	0.828326
TCGA.55.8508.01	EPHA7-WT	0.147806	0	0.381412	0.0419038	0	0.0602595	0.0237644	0.019037	0.0248916	0	0.0471245	0	0	0.141679	0.00986096	0.0456723	0	0	0	0.0378092	0	0.0187794	0.003	0.567439	0.830911
TCGA.A2.A4S1.01	EPHA7-WT	0	0.0175506	0	0.0475722	0	0	0	0.0168214	0.0116887	0.00169727	0.0282293	0	0	0.134007	0.0188115	0.684131	0.00106137	0	0.0335743	0	0	0.00485599	0.003	0.593273	0.805049
TCGA.GS.A9TQ.01	EPHA7-WT	0.249545	0.210695	0.0474374	0.162358	0	0	0.0057272	0.0576695	0.0185628	0	0	0.0327282	0.0254122	0.0847253	0.0225106	0.0761429	0	0	0.00648528	0	0	0	0.003	0.589224	0.807753
TCGA.85.A4PA.01	EPHA7-WT	0.216295	0.223057	0.030156	0.0791029	0	0.105925	0	0.104064	0.0721329	0	0.0201133	0	0.00733439	0.0388212	0	0.0762803	0	0.0226162	0	0.00410168	0	0	0.003	0.572673	0.819471
TCGA.VQ.A8PQ.01	EPHA7-WT	0.24122	0.223367	0.0180242	0.0594917	0.0484969	0.19724	0.0224091	0	0.0202776	0	0.0292264	0	0.00757395	0.0378699	0.0201411	0.0689472	0	0.00571563	0	0	0	0	0.003	0.566357	0.823531
TCGA.EE.A2GK.06	EPHA7-WT	0.138176	0.331082	0.0340765	0.103513	0	0.101777	0	0.0943866	0.0611996	0	0	0	0.0060392	0.0282218	0.0137396	0.0877896	0	0	0	0	0	0	0.003	0.590918	0.806494
TCGA.43.A56U.01	EPHA7-WT	0.0956257	0.10161	0.298563	0.0797	0	0.132993	0.0002	0.0806592	0.00465372	0	0	0.0238179	0.00978144	0.0474367	0.0301349	0.0913983	0	0	0.00334859	0	0	0.0001	0.003	0.581066	0.814066
TCGA.S3.AA15.01	EPHA7-WT	0.159461	0.0383965	0.348522	0.0765884	0	0.0602674	0.00865752	0.0393199	0.00322218	0.0003	0	0.0121697	0.0197849	0.0379396	0.0210355	0.147778	0	0	0.0265461	0	0	0	0.003	0.596787	0.80505
TCGA.BR.8371.01	EPHA7-WT	0.387743	0.165406	0.0186958	0.0710241	0	0.140809	0	0.017688	0.0725429	0	0	0.00745665	0.00488594	0	0.00575469	0.0777842	0	0.0211111	0.00909909	0	0	0	0.003	0.564828	0.826556
TCGA.FW.A5DY.06	EPHA7-WT	0.172035	0.317319	0.0429247	0.10126	0	0.0577541	0	0.0660092	0.0574444	0	0.00634164	0.0009	0.00548088	0.0338202	0.0228714	0.115259	0	0	0.0006	0	0	0	0.003	0.596599	0.802229
TCGA.BR.A44T.01	EPHA7-WT	0.376694	0.168932	0.0234613	0.0963594	0	0.0679802	0.00293909	0.102336	0.0246924	0.00967701	0	0.0192844	0	0.0236409	0.014138	0.0619434	0	0.00241396	0.00550803	0	0	0	0.003	0.587435	0.809423
TCGA.4Z.AA7N.01	EPHA7-WT	0.301292	0.242477	0	0.0486919	0	0.0563692	0.0170275	0.100795	0.0365309	0	0	0.008474	0.00260457	0.0738413	0.0123316	0.0920037	0	0.00710403	0.0005	0	0	0	0.003	0.577235	0.815868
TCGA.D7.8574.01	EPHA7-WT	0.00941111	0.470567	0	0.146763	0	0.109469	0	0.0502769	0.0854527	0	0	0	0.0149158	0.0218928	0.0098648	0.0702057	0	0	0.00817972	0	0	0.0029628	0.003	0.579659	0.814757
TCGA.HU.A4GJ.01	EPHA7-WT	0.114754	0.322709	0.0746548	0.0900579	0	0.134671	0.0107419	0.125056	0.0191367	0	0	0.00585459	0	0.0116692	0.0004	0.0662599	0	0.0169609	0	0.00703487	0	0	0.003	0.601888	0.798377
TCGA.BR.A4J6.01	EPHA7-WT	0.163893	0	0.41107	0.0940312	0	0.0955302	0	0.047418	0.00613836	0	0	0.0544111	0.0106213	0	0	0.0986743	0	0.00661893	0.0115937	0	0	0	0.004	0.557625	0.84892
TCGA.99.8032.01	EPHA7-WT	0.0897719	0	0.38078	0.0977067	0	0.0649241	0	0.0738061	0.0196889	0	0	0	0.0196571	0.0494123	0.0083917	0.140715	0	0.00373874	0.0420029	0	0	0.00940415	0.004	0.547928	0.84208
TCGA.EB.A5VV.06	EPHA7-WT	0.255328	0.183952	0.0217385	0.113595	0	0.186142	0	0.0591174	0.0449728	0	0	0	0.0147719	0.0103465	0.0196591	0.0886217	0	0.00175527	0	0	0	0	0.004	0.550572	0.834022
TCGA.NK.A5CR.01	EPHA7-WT	0.170239	0	0.34376	0.045146	0	0	0.0271005	0.0141474	0	0	0.0413049	0	0.0126186	0.10105	0.00782554	0.153538	0	0	0	0.0823007	0	0.001	0.004	0.545831	0.844364
TCGA.MP.A4TD.01	EPHA7-WT	0.151231	0	0.304649	0.0867645	0	0.036327	0	0.100936	0.0148094	0	0.00366563	0	0.0274102	0.100653	0.00780913	0.146604	0	0.00517475	0.00959227	0.00437423	0	0	0.004	0.557607	0.830554
TCGA.2H.A9GI.01	EPHA7-WT	0.264949	0	0.311899	0.0399453	0	0.144662	0.0101375	0.00831272	0.0333199	0	0.0467782	0	0.0184176	0.0323395	0.0003	0.0085016	0.00705395	0.0116867	0	0.0617142	0	0	0.004	0.559265	0.837233
TCGA.22.1011.01	EPHA7-WT	0.00761646	0.100935	0.352407	0.0751138	0	0.1069	0.0101853	0.0368963	0.0110306	0	0	0.00448454	0.0154685	0.0637021	0.0320872	0.154123	0	0.0143657	0.00105394	0.0136314	0	0	0.004	0.559744	0.830413
TCGA.E9.A2JT.01	EPHA7-WT	0.167432	0.245044	0.0377902	0.136527	0	0.163564	0	0.0660582	0.0461786	0	0	0.020349	0.00805139	0.0153365	0.0368161	0.0436566	0	0	0.0131958	0	0	0	0.004	0.553917	0.831823
TCGA.44.A4SU.01	EPHA7-WT	0.222596	0	0.285435	0.0129211	0	0.122689	0	0.0940448	0.0123027	0	0.00464305	0	0	0.0673227	0.0435322	0.0975356	0.0299348	0.00232798	0	0.00471496	0	0	0.004	0.553624	0.834712
TCGA.DK.A3WY.01	EPHA7-WT	0.273843	0.126107	0.0619973	0.139686	0	0.0374508	0.00418383	0.127991	0.0354333	0	0.0140793	0	0.00419408	0.0334632	0.0289152	0.107754	0	0	0.00490315	0	0	0	0.004	0.558874	0.828562
TCGA.BL.A3JM.01	EPHA7-WT	0.00354335	0.00227271	0.00955956	0.237239	0	0	0	0.11509	0.0173671	0	0	0.0428197	0	0.296373	0.0487174	0.189139	0	0	0.0378803	0	0	0	0.004	0.559052	0.832703
TCGA.AC.A23E.01	EPHA7-WT	0.0405125	0	0.00866949	0.0192095	0	0.00235507	0	0.028003	0.0006	0	0	0.00296007	0	0.160122	0.0112732	0.541019	0	0	0.148204	0	0	0.0370907	0.004	0.559387	0.829403
TCGA.49.AAR2.01	EPHA7-WT	0.115996	0	0.348096	0.126732	0	0.0413086	0.0190572	0.0268712	0.0578842	0	0.00497205	0	0.0198016	0.0328526	0.0417945	0.145016	0	0	0	0.0117972	0	0.00782084	0.004	0.547971	0.839557
TCGA.G8.6324.01	EPHA7-WT	0.235574	0.0761238	0.142958	0.0977711	0.0163316	0	0	0.0797014	0.149554	0	0	0.0340968	0.0129219	0.0272194	0.0312644	0.0964835	0	0	0	0	0	0	0.004	0.561788	0.826597
TCGA.D8.A145.01	EPHA7-WT	0.170996	0	0.368932	0.0474865	0	0.080041	0	0.0298178	0.0007	0	0	0.0152911	0	0.031324	0.018701	0.137295	0.0141748	0	0.0852128	0	0	0	0.004	0.55087	0.84328
TCGA.VB.A8QN.01	EPHA7-WT	0	0.427443	0	0.0733809	0	0.0115887	0.0445788	0.0964591	0	0	0.0538692	0	0.0147855	0.154082	0.0734127	0.0383807	0	0	0.0120197	0	0	0	0.004	0.545993	0.838742
TCGA.GR.A4D6.01	EPHA7-MUT	0.144593	0.208519	0.0827202	0.225266	0	0	0.0100704	0.128767	0.0478149	0.019414	0	0.0004	0	0.0258278	0.0142877	0.0915047	0	0	0.0009	0	0	0	0.004	0.558423	0.828891
TCGA.55.7570.01	EPHA7-WT	0.146234	0	0.353554	0.140162	0	0.00450838	0.00855039	0.0971031	0	0	0	0.0439809	0.0135331	0.0209184	0.0149334	0.149263	0	0	0.00327669	0.00398228	0	0	0.004	0.553905	0.838388
TCGA.BR.6453.01	EPHA7-WT	0.280461	0.0753103	0.0853776	0.143281	0	0.078119	0	0.0280473	0.0408116	0	0	0.0121238	0.00192879	0.014173	0.00955366	0.190844	0	0.0200124	0.0199566	0	0	0	0.004	0.560491	0.828184
TCGA.LL.A441.01	EPHA7-WT	0.368104	0.102604	0.0172585	0.0406965	0	0.125961	0	0.113215	0.0183982	0.0025328	0.00934114	0	0	0.0918526	0.0356337	0.0580566	0	0	0.0163454	0	0	0	0.004	0.547651	0.836083
TCGA.B6.A1KC.01	EPHA7-WT	0.00310445	0.00794883	0	0.102904	0	0	0	0.0473387	0.0145809	0	0.0107102	0	0.0153392	0.164668	0.0101533	0.475779	0	0	0.147474	0	0	0	0.004	0.549997	0.837464
TCGA.MP.A4TE.01	EPHA7-WT	0.222238	0	0.446865	0.0526169	0	0.00792357	0	0.0269347	0.0171738	0	0.0361585	0	0.0137713	0.0399527	0	0.0490455	0	0.00362437	0	0.0588743	0	0.024821	0.004	0.558427	0.867073
TCGA.56.8622.01	EPHA7-WT	0.150962	0	0.366498	0.0258777	0	0.00806396	0	0.0512543	0.027552	0	0.0302116	0	0.0115462	0.0933028	0.00662319	0.185837	0	0.00430759	0.0288776	0.0023256	0	0.00675984	0.004	0.552599	0.840689
TCGA.85.8070.01	EPHA7-WT	0.191836	0	0.388539	0.136811	0	0	0	0.0479254	0.0185008	0	0	0.00736641	0.0367882	0.0567513	0	0.0545532	0	0.0293878	0.0310195	0	0.0005	0	0.004	0.55246	0.849752
TCGA.BB.4217.01	EPHA7-WT	0.169994	0.180293	0.143105	0.0316459	0.029087	0.165565	0.0181943	0.116264	0.0184651	0	0.0006	0	0.0206515	0	0.00741791	0.0837849	0	0.0137216	0.00121488	0	0	0	0.004	0.562802	0.825931
TCGA.05.4420.01	EPHA7-WT	0.244849	0	0.312515	0.0515406	0	0.0690799	0	0	0	0	0.00941281	0	0.0239804	0	0.00173139	0.160409	0	0.00335957	0	0.0510368	0	0.0720863	0.005	0.516462	0.868019
TCGA.39.5031.01	EPHA7-WT	0.103391	0	0.246563	0.07694	0	0.0890592	0.0109998	0.059357	0.00702048	0	0	0.00248988	0	0.122265	0.0688304	0.202673	0	0	0.00570928	0.00398741	0	0.0007	0.005	0.504375	0.862943
TCGA.N9.A4Q1.01	EPHA7-WT	0.111087	0	0.321951	0.112165	0	0.0477178	0	0.0454256	0.0117333	0	0	0	0	0.0696269	0.00318774	0.24893	0	0	0.0235265	0	0	0.00465062	0.005	0.509463	0.864723
TCGA.BA.6870.01	EPHA7-WT	0	0.136409	0.270533	0.0677584	0	0.0680216	0	0.0516919	0.0262498	0	0.0236164	0	0.0150603	0.0965905	0	0.106353	0.00626556	0.0450161	0.0170247	0.0656077	0	0.00380266	0.005	0.508779	0.860815
TCGA.55.A4DG.01	EPHA7-WT	0.197743	0	0.17734	0.101647	0	0.174023	0	0.0409425	0	0	0	0.0103295	0.0124669	0.0151545	0.0383424	0.201014	0	0	0.0309982	0	0	0	0.005	0.504573	0.862579
TCGA.BH.A28O.01	EPHA7-WT	0.173982	0	0.265189	0.126114	0	0.157432	0	0.0382266	0.00142167	0	0	0.034108	0.0147963	0	0.0231358	0.149552	0	0	0.0160434	0	0	0	0.005	0.514893	0.858928
TCGA.D3.A5GR.06	EPHA7-WT	0.0140861	0.267941	0.0842932	0.0625441	0	0.00331261	0.024346	0.0717354	0.041966	0.00392197	0	0.0205708	0	0.283554	0.0556997	0.045537	0	0	0.0204913	0	0	0	0.005	0.505254	0.862537
TCGA.39.5039.01	EPHA7-WT	0.241537	0	0.217985	0.0399682	0	0.0954836	0	0.0296537	0	0	0.0260699	0	0	0	0.0527575	0.226963	0	0.0210944	0	0.0440963	0	0.00439155	0.005	0.518867	0.855056
TCGA.49.AARN.01	EPHA7-WT	0.0545908	0.0611066	0.28567	0.0531764	0	0.145785	0	0.0564758	0.0637354	0	0	0.0300628	0.00254972	0	0.0215935	0.176508	0.0136953	0.00416654	0.0292815	0	0	0.0016036	0.005	0.508082	0.861911
TCGA.BR.7196.01	EPHA7-WT	0.16597	0	0.266286	0.151443	0	0.0968358	0	0.0265141	0.0149533	0	0.00423452	0.0160293	0.0233293	0	0.117445	0.0881976	0.00198631	0	0.0267754	0	0	0	0.005	0.524784	0.852913
TCGA.55.A491.01	EPHA7-WT	0.198252	0	0.230914	0.0708427	0	0	0	0.0451252	0.0472512	0	0.0331538	0	0.0300627	0.116139	0.0504398	0.164656	0	0	0.00932345	0.00384084	0	0	0.005	0.539735	0.841097
TCGA.UY.A9PE.01	EPHA7-WT	0	0.14925	0.369692	0.076947	0.0376347	0	0.00703165	0	0.038776	0	0.00391461	0.0002	0	0.0973509	0.0225226	0.129166	0	0.00873372	0	0.0535948	0	0.00516649	0.005	0.499179	0.881475
TCGA.J9.A8CP.01	EPHA7-MUT	0.0404242	0	0.0445818	0.0523988	0	0.0481836	0	0.0504652	0.0052865	0	0	0.0795433	0.00496791	0	0.0162358	0.0719497	0	0.00245976	0.583504	0	0	0	0.005	0.509315	0.864685
TCGA.AJ.A3BK.01	EPHA7-WT	0.0546734	0	0.00165623	0.189598	0	0.0673676	0	0.076353	0.105417	0	0.0204638	0.0137257	0.010007	0.217749	0.0167807	0.182876	0	0	0	0.0433333	0	0	0.005	0.519216	0.856981
TCGA.CN.5356.01	EPHA7-WT	0.177821	0	0.201269	0.0863792	0	0.0779706	0	0.0842943	0.0118408	0	0.0530908	0	0.0666032	0.0381225	0.0170982	0.112797	0	0	0	0.0727137	0	0	0.005	0.483894	0.874627
TCGA.44.8119.01	EPHA7-WT	0.128765	0	0.235196	0.0575758	0	0.00362428	0.0170073	0.0326515	0	0	0.0205875	0.0351511	0.0162012	0.166286	0.0382567	0.210432	0	0	0	0.0333069	0	0.00495846	0.005	0.484617	0.875228
TCGA.F4.6461.01	EPHA7-WT	0.482435	0	0	0.043188	0	0.156613	0	0.0521569	0.0152116	0	0.0320739	0	0.0150946	0.0529803	0.030492	0.101844	0	0	0	0.017911	0	0	0.005	0.480568	0.881055
TCGA.QS.A5YR.01	EPHA7-WT	0.0597766	0	0.323091	0.0944388	0	0.0374054	0.0035339	0.0602998	0.0418258	0	0.0195435	0	0	0.133388	0.0003	0.183871	0	0	0	0.0253238	0	0.0171692	0.005	0.501279	0.868126
TCGA.98.A538.01	EPHA7-WT	0.134026	0	0.251914	0.0761805	0	0.0997051	0.00542201	0.0380783	0.00955153	0	0.0201867	0.013483	0.0154785	0.0354585	0.0666428	0.151498	0.0208266	0	0	0.0521273	0	0.00942156	0.005	0.502803	0.86402
TCGA.XF.A9T0.01	EPHA7-WT	0	0.0139849	0.397419	0.116877	0	0	0.0287516	0.0474633	0.0153787	0	0	0.0589573	0.00390599	0.0559078	0.0487162	0.186562	0	0	0.0229581	0	0	0.0031189	0.005	0.499688	0.876235
TCGA.62.A46O.01	EPHA7-MUT	0.0830911	0	0.533427	0.131777	0	0	0	0.0610363	0.00824446	0	0.016309	0.00888651	0.0185465	0.0376157	0	0.0264462	0	0.0671703	0	0.0074496	0	0	0.005	0.531594	0.902829
TCGA.85.A4JB.01	EPHA7-WT	0.196086	0	0.258609	0.0332298	0	0.0732839	0	0.0781804	0	0	0	0.0454773	0.0101877	0.140359	0.0875543	0.0460977	0	0.0146047	0	0.00926105	0	0.00706865	0.005	0.492639	0.874258
TCGA.NJ.A55R.01	EPHA7-WT	0.0334701	0.155265	0.231211	0.0605323	0	0.011583	0	0.0767823	0.00667392	0	0	0.0241112	0	0.159489	0.00222364	0.20158	0	0	0.0370784	0	0	0	0.005	0.534037	0.845003
TCGA.62.8395.01	EPHA7-WT	0.133732	0	0.268274	0.0466681	0	0.112758	0	0.0588964	0.00319561	0	0	0.0275452	0.0180008	0	0.0223544	0.221158	0.0647513	0	0	0.0180473	0	0.00461905	0.005	0.509207	0.860607
TCGA.50.5051.01	EPHA7-WT	0.0827993	0	0.297744	0.0841157	0	0	0	0.123563	0.0131496	0	0.0267074	0	0.0303595	0.124175	0	0.126493	0	0.0647628	0	0.0261301	0	0	0.005	0.502035	0.865772
TCGA.05.4405.01	EPHA7-WT	0.201962	0	0.195774	0.0693898	0	0.025515	0	0.0341491	0.0249612	0	0.0173996	0	0	0.16122	0	0.24264	0	0	0.018746	0.0009	0	0.00735168	0.005	0.521487	0.852691
TCGA.MP.A4TF.01	EPHA7-WT	0.138	0	0.309042	0.0665125	0	0.0108434	0.0217702	0.049557	0	0	0.0452426	0.0508531	0	0.117147	0.0605281	0.0862461	0	0.015189	0	0.0106541	0	0.0184148	0.005	0.531589	0.849122
TCGA.86.7701.01	EPHA7-WT	0.0507039	0.0167113	0.267861	0.0865388	0	0.191845	0	0.0959174	0.0324981	0	0	0.0376426	0	0.0280486	0.0206966	0.146236	0.00585259	0.0007	0.0187535	0	0	0	0.005	0.48065	0.877863
TCGA.K4.A3WU.01	EPHA7-WT	0.208455	0.207335	0.0222414	0.0958839	0.00818771	0.0753483	0.00386984	0.0884835	0.00856705	0	0	0.0300331	0.0104589	0.0444393	0.0015699	0.153598	0	0.00803717	0.031824	0	0	0.00166887	0.005	0.528263	0.848546
TCGA.43.6773.01	EPHA7-WT	0.0664434	0	0.334244	0.115277	0	0.108162	0.0004	0.00961977	0.00273008	0	0	0.0405593	0.0149929	0.0218017	0.0181422	0.251421	0	0.0003	0.0115576	0	0	0.00430392	0.005	0.530742	0.848919
TCGA.VQ.A91N.01	EPHA7-WT	0.205166	0	0.225641	0.0612884	0	0.167592	0	0.0520521	0.0328101	0	0	0.0670363	0	0.019035	0.0395257	0.0621271	0.0148608	0.00947682	0.043388	0	0	0	0.005	0.478982	0.880391
TCGA.55.A490.01	EPHA7-WT	0.12018	0	0.250508	0.0866674	0	0.0646608	0.00964219	0.0106913	0.0527555	0	0	0	0.0115742	0.160739	0	0.196938	0.018554	0.00811702	0.00212232	0.00227686	0	0.00457278	0.005	0.498703	0.867054
TCGA.GM.A3XN.01	EPHA7-WT	0.202766	0	0.195673	0.0741805	0	0.0749902	0	0.0807949	0.00481709	0	0	0.0293633	0	0.081588	0.0752	0.163805	0	0	0.0168217	0	0	0	0.005	0.505567	0.862143
TCGA.FA.A82F.01	EPHA7-MUT	0.239566	0.157976	0	0.153464	0	0	0.0251756	0.135911	0	0	0	0.0326219	0	0.0924781	0.0456966	0.117111	0	0	0	0	0	0	0.005	0.507813	0.860673
TCGA.91.8497.01	EPHA7-WT	0.108521	0	0.312649	0.0490144	0	0.0955988	0	0.0475328	0.0183332	0	0	0.0163483	0.0168518	0	0.00190445	0.233922	0.0502099	0	0.049114	0	0	0	0.005	0.542476	0.840171
TCGA.AR.A0TS.01	EPHA7-WT	0.231596	0.126468	0	0.0595307	0.00422342	0.166742	0	0.0459371	0.0377822	0	0.0124293	0	0.0116947	0.0272991	0.0638409	0.20774	0	0	0.00471639	0	0	0	0.005	0.482894	0.874875
TCGA.L5.A4OO.01	EPHA7-WT	0.0973669	0	0.296503	0.0895265	0	0.190399	0.00411373	0.0459308	0.00812062	0	0	0.00806201	0.00869528	0	0.0971377	0.124003	0	0.00348575	0.0266554	0	0	0	0.005	0.502158	0.867146
TCGA.E2.A109.01	EPHA7-WT	0.141511	0	0.197909	0.0651643	0	0.097628	0	0.0339788	0.033591	0	0	0.0306238	0	0.0951079	0.0536536	0.208346	0	0	0.0424864	0	0	0	0.005	0.479332	0.87687
TCGA.BH.A1FH.01	EPHA7-WT	0.179421	0	0.178365	0.0898205	0	0.0776605	0	0.00843891	0.00240305	0	0	0.0317138	0.0154335	0	0.0173575	0.280885	0.001093	0	0.116573	0.0008	0	0	0.005	0.480883	0.876054
TCGA.RD.A8N0.01	EPHA7-WT	0.0179469	0.312199	0.0434022	0.151641	0	0.145988	0	0.124884	0.0104606	0.00610404	0	0.0441181	0	0	0.0180209	0.0616341	0	0.00806604	0.0555341	0	0	0	0.005	0.506462	0.861495
TCGA.MX.A666.01	EPHA7-WT	0.438868	0.0634109	0	0.0120075	0	0.146091	0	0.107634	0.00814129	0	0	0.0389148	0.0214837	0.0574295	0	0.0176362	0	0.00676373	0.0816187	0	0	0	0.005	0.509864	0.862241
TCGA.73.A9RS.01	EPHA7-WT	0.217426	0	0.264912	0.147388	0	0	0.00892148	0.0922074	0.0050465	0	0.0144259	0	0.0168825	0.0238439	0.0185369	0.14132	0	0.0006	0.0484475	0	0	0	0.005	0.508324	0.864814
TCGA.D3.A2JD.06	EPHA7-WT	0.366176	0	0.139094	0.131215	0	0.0064706	0	0.132981	0.0683485	0	0.0195284	0.0001	0.00695037	0.0451712	0.00557144	0.0783606	0	0	0	0	0	0	0.005	0.515268	0.860372
TCGA.L5.A8NH.01	EPHA7-WT	0.209495	0	0.208637	0.0811301	0	0.143548	0	0.0915448	0.0316094	0	0.0180287	0.00165912	0.0183172	0.00813887	0.0382567	0.102292	0	0.0183769	0	0.0289665	0	0	0.005	0.485074	0.875674
TCGA.64.5774.01	EPHA7-WT	0.181669	0	0.320826	0.0831727	0	0.0977762	0	0.0488069	0.0483415	0	0	0.0628743	0	0.0453925	0	0.0912577	0	0.00522995	0.0003	0.0005	0	0.0139261	0.005	0.526391	0.857441
TCGA.78.7149.01	EPHA7-WT	0.149851	0	0.373479	0.0918556	0	0.0408366	0	0.0887076	0.0018937	0	0	0.0271189	0.0122017	0.0247537	0.0355942	0.127731	0	0.0075355	0.0184418	0	0	0	0.005	0.530708	0.859483
TCGA.56.A5DS.01	EPHA7-WT	0.114625	0.00570228	0.301492	0.0491477	0	0.136542	0	0.105138	0.0006	0	0	0.0168738	0.0117506	0	0.0225374	0.140096	0.0004	0.0142479	0.0483641	0	0	0.0324793	0.005	0.524903	0.851789
TCGA.67.3774.01	EPHA7-WT	0.187923	0	0.187361	0.0803718	0	0.114275	0	0.0663639	0	0	0.0236913	0	0.022236	0	0.0373426	0.234631	0.00179588	0.0106688	0.0238602	0	0	0.00947884	0.005	0.510306	0.859253
TCGA.N8.A4PM.01	EPHA7-WT	0.00603886	0.00379613	0.00397528	0.0466377	0	0.0576678	0	0.0566844	0.0108131	0	0.0168688	0	0.0294494	0.151042	0	0.543547	0	0.00721676	0.0554176	0.010846	0	0	0.005	0.514897	0.857309
TCGA.63.A5MG.01	EPHA7-WT	0.109239	0	0.405325	0.0699364	0	0.0662254	0	0.0298968	0	0	0.0530136	0	0.024164	0.0418738	0.00321212	0.132432	0.00176676	0.0261142	0	0.0247094	0	0.0120918	0.005	0.543085	0.851224
TCGA.CR.7402.01	EPHA7-WT	0.122896	0	0.265408	0.0909728	0	0.130686	0.0164868	0.0112545	0.0456978	0	0.0252962	0.0441809	0.0367491	0.0679004	0.0361991	0.0507891	0.0344389	0	0.0210443	0	0	0	0.005	0.490048	0.872376
TCGA.78.7537.01	EPHA7-WT	0.0817062	0	0.288771	0.101072	0	0.0377288	0	0.048333	0.0447491	0	0	0.0179947	0.00412993	0	0	0.271437	0.0504224	0.0187642	0.034891	0	0	0	0.005	0.489115	0.873195
TCGA.FD.A3SQ.01	EPHA7-WT	0.214564	0	0.248464	0.0282719	0	0	0.00421414	0.0283567	0.0338944	0	0.0328927	0	0.00387299	0.148137	0.0469254	0.175865	0	0.00195488	0.0325865	0	0	0	0.005	0.519794	0.855621
TCGA.CV.7248.01	EPHA7-WT	0.147995	0	0.204403	0.100597	0	0.0358921	0.00724946	0.0663068	0.0118018	0	0	0.00800642	0	0.111026	0.0342352	0.25998	0	0	0.0122686	0	0	0.0002	0.005	0.498214	0.866363
TCGA.C8.A3M7.01	EPHA7-WT	0.214751	0	0.253937	0.110247	0	0.0954519	0	0.0180462	0.00919075	0	0	0.00409392	0.0123954	0	0.0818841	0.0898877	0.00424675	0	0.105869	0	0	0	0.005	0.515106	0.859099
TCGA.50.5930.01	EPHA7-MUT	0.0583945	0	0.288051	0.114542	0	0.0634078	0	0.0496829	0.0045227	0	0	0.0229583	0.0142907	0.0760192	0.0536459	0.242044	0	0	0.0124407	0	0	0	0.005	0.501774	0.865129
TCGA.CV.7101.01	EPHA7-WT	0.153799	0	0.211478	0.0497778	0	0.0882554	0.00413293	0.0314109	0	0	0.0370207	0.00642574	0.0344867	0.141822	0.0507953	0.172438	0	0	0.018157	0	0	0	0.005	0.509258	0.859852
TCGA.DK.A3IT.01	EPHA7-WT	0.287754	0	0.248247	0.0476751	0	0.0542116	0.0002	0.0364488	0.0248745	0	0.0179071	0	0.0284327	0	0.055988	0.151773	0	0.00983402	0.0366807	0	0	0	0.005	0.526651	0.85433
TCGA.M9.A5M8.01	EPHA7-WT	0.220339	0	0.257797	0.0467918	0	0.158865	0	0	0.0494343	0	0.0174234	0.001	0	0.0820732	0.00889205	0.03811	0	0.0207427	0	0.0767492	0	0.0218236	0.005	0.523064	0.85401
TCGA.BR.6710.01	EPHA7-WT	0.154808	0	0.263665	0.135822	0	0.152025	0	0.00458404	0.0610837	0	0	0.0383439	0.0198946	0	0.00214299	0.0635371	0	0.00361283	0.100481	0	0	0	0.005	0.503908	0.865526
TCGA.MP.A4SW.01	EPHA7-WT	0.205628	0	0.165299	0.0784979	0	0.12764	0	0.022654	0.0453452	0	0.0202269	0	0.0246705	0.0430292	0.0103009	0.223412	0	0.00705606	0.0230189	0	0	0.00322088	0.005	0.513037	0.857888
TCGA.S2.AA1A.01	EPHA7-WT	0.0586659	0.0795074	0.230433	0.0607563	0	0.196784	0	0.0705832	0.00912668	0	0	0.0291222	0.013255	0.0445114	0.0409991	0.123323	0.00291427	0	0.0400187	0	0	0	0.005	0.530745	0.847003
TCGA.L9.A50W.01	EPHA7-WT	0.181054	0	0.220633	0.0321296	0	0.109848	0	0.052363	0.0186461	0	0	0.0169128	0.0183491	0	0.0301723	0.146585	0.111504	0	0.059248	0	0	0.00255441	0.005	0.517447	0.855006
TCGA.D3.A2JB.06	EPHA7-WT	0.12591	0.204352	0.0542436	0.103908	0	0.0909952	0	0.156835	0.0162063	0	0	0.00794547	0	0.0634806	0.0565538	0.116128	0	0	0.00344291	0	0	0	0.005	0.52334	0.851852
TCGA.A5.A2K4.01	EPHA7-WT	0.307396	0	0.137111	0.112222	0	0.0270777	0	0.0860094	0.00848233	0.039752	0	0.00236121	0.00297672	0.0681576	0.0119483	0.139679	0	0.0159768	0	0.0313206	0.00952877	0	0.005	0.485487	0.874918
TCGA.XF.A9SU.01	EPHA7-WT	0.182051	0	0.238364	0.156337	0	0	0.00631578	0.0251928	0.0393291	0	0	0	0	0.0279798	0.0554733	0.250061	0	0	0.018897	0	0	0	0.005	0.48463	0.876508
TCGA.L5.A4OJ.01	EPHA7-WT	0.0718094	0	0.41091	0.0578836	0	0.151325	0.0269307	0.0244292	0.0182109	0	0.0327946	0	0.00250764	0.0406173	0.00569216	0.0632244	0	0.0205977	0	0.073067	0	0	0.005	0.516802	0.870597
TCGA.HU.A4HB.01	EPHA7-WT	0.248322	0.0469303	0.0789225	0.0640074	0	0.17677	0	0.121913	0.033115	0	0	0.0195737	0	0.0520147	0.0180494	0.100728	0	0.00205887	0.0375949	0	0	0	0.005	0.495789	0.867655
TCGA.CD.8529.01	EPHA7-WT	0.21871	0	0.184294	0.0452314	0	0.114905	0.0001	0.03795	0.0482118	0	0.0008	0.00393035	0	0.110337	0.0483264	0.177588	0.0005	0	0.00873105	0	0	0.0004	0.005	0.533533	0.845112
TCGA.73.4668.01	EPHA7-WT	0.170199	0	0.295241	0.082436	0	0.0444423	0.0147903	0.019683	0.0141478	0	0	0	0	0.156446	0	0.122938	0	0.0186832	0.0582818	0	0	0.00271137	0.005	0.512883	0.862067
TCGA.5M.AAT5.01	EPHA7-WT	0.214816	0	0.319657	0.0462916	0	0.10729	0.00571691	0.0590781	0.00775938	0	0.0439668	0	0.00654144	0.0406944	0.0101221	0.0657279	0	0.00682005	0	0.0655183	0	0	0.005	0.483946	0.89074
TCGA.77.8140.01	EPHA7-MUT	0.130145	0	0.289877	0.159663	0	0	0	0.0789625	0.00740145	0	0	0	0.0618887	0.0957973	0.00447196	0.063324	0	0.0156852	0.0927846	0	0	0	0.005	0.521867	0.853502
TCGA.HU.A4H6.01	EPHA7-WT	0.308983	0	0.143921	0.0289307	0	0.162794	0	0.0918014	0	0	0	0.0432136	0	0.0324848	0.0475264	0.068983	0.00291456	0.00576526	0	0.0319345	0	0.0307481	0.005	0.512194	0.85879
TCGA.05.5429.01	EPHA7-WT	0.158844	0	0.283124	0.0470825	0	0.109753	0	0.040277	0	0	0	0.0256296	0.00858818	0	0.0277964	0.228712	0.0271528	0	0.0145869	0.0158886	0	0.0125655	0.005	0.499129	0.868929
TCGA.39.5034.01	EPHA7-WT	0.0753659	0	0.337802	0.0681519	0	0.142668	0	0.0424517	0.00292066	0	0	0.0477717	0.00460949	0.0235581	0.0353723	0.158126	0.0299359	0.0035986	0.0276678	0	0	0	0.005	0.520536	0.856023
TCGA.39.5029.01	EPHA7-MUT	0.168277	0	0.184949	0.121552	0	0.0367135	0.00663849	0.0469346	0.0252501	0	0	0.0565192	0	0.0820722	0.0795384	0.129997	0.00192759	0	0.0596308	0	0	0	0.005	0.505438	0.862159
TCGA.46.3765.01	EPHA7-WT	0.051524	0	0.278325	0.102593	0	0.112632	0.0324123	0.0385535	0	0	0	0.0234007	0	0.0318549	0.0625501	0.22108	0.00738119	0.0005	0.0240617	0	0	0.0131681	0.005	0.486974	0.873278
TCGA.86.8358.01	EPHA7-WT	0.144847	0	0.234255	0.0709979	0	0.0273162	0	0.0742917	0.0127043	0	0	0.0450293	0	0.081154	0.052277	0.239873	0.00194045	0	0.0153151	0	0	0	0.005	0.498575	0.866518
TCGA.RQ.A68N.01	EPHA7-WT	0.04601	0.3301	0	0.229218	0	0	0.0430847	0.0461511	0.00480815	0.00648539	0	0.00534251	0	0.0915009	0.058667	0.132469	0	0	0.00616283	0	0	0	0.005	0.532365	0.847367
TCGA.63.A5MI.01	EPHA7-WT	0.232635	0	0.279664	0.0559418	0	0.00783594	0.0047433	0.0481103	0.0162248	0	0.0130004	0	0	0.066952	0.006735	0.151438	0	0.0526347	0.0379759	0.0051801	0	0.0209298	0.005	0.526621	0.853607
TCGA.BB.7864.01	EPHA7-WT	0.183076	0	0.303528	0.0445346	0	0	0.0152224	0.0367485	0.0166653	0	0.0225707	0	0	0.240317	0.0464811	0.0872052	0	0	0	0.00365151	0	0	0.005	0.4932	0.880564
TCGA.69.7763.01	EPHA7-WT	0.12643	0	0.223859	0.0831413	0	0.0947326	0	0.0531014	0.0340787	0	0.0179822	0	0.0239215	0.0354318	0.00828038	0.242002	0	0.00661917	0.044484	0	0	0.00593557	0.005	0.497908	0.866529
TCGA.66.2763.01	EPHA7-WT	0.191628	0	0.151543	0.0689154	0	0.0930014	0.00198039	0.0148843	0.0237565	0	0.0142845	0.037689	0.017937	0.0644915	0.0672387	0.194405	0	0.0150379	0.036769	0	0	0.00643941	0.005	0.490721	0.870729
TCGA.56.8304.01	EPHA7-WT	0.16872	0	0.23217	0.117663	0	0.0273807	0.048614	0.032801	0.018679	0	0.0234432	0.0338692	0.0222358	0.0516307	0.0341131	0.12502	0	0.022599	0	0.0410619	0	0	0.005	0.522657	0.851773
TCGA.44.2657.01	EPHA7-WT	0.0750294	0.0547555	0.166623	0.166574	0	0.0440772	0	0.0910617	0.0487577	0	0	0.0286599	0.00661409	0	0.0561314	0.208756	0	0.00265733	0.0503025	0	0	0	0.005	0.486677	0.873071
TCGA.95.7562.01	EPHA7-WT	0.210713	0	0.142611	0.0654794	0	0.103838	0.00186603	0.0465744	0.0188299	0	0.0240674	0	0.0232686	0.0628687	0.0611962	0.216106	0.00462978	0	0.0098363	0.00811599	0	0	0.005	0.492893	0.8694
TCGA.FA.A6HO.01	EPHA7-WT	0.195321	0.107593	0.0456545	0.095173	0	0	0.0200367	0.0892505	0.0473048	0.0199606	0	0.0151507	0	0.211222	0.091809	0.0460432	0	0	0.015481	0	0	0	0.005	0.49809	0.866495
TCGA.55.A492.01	EPHA7-WT	0.122968	0	0.40866	0.051998	0	0.0266465	0	0.0911791	0.00878811	0	0	0.0266173	0.0185577	0.0006	0.00870643	0.163918	0	0.0374107	0.0339077	0	0	0	0.005	0.544847	0.851969
TCGA.BR.A4IU.01	EPHA7-WT	0.203098	0.195623	0	0.0693491	0	0.221711	0	0.0345796	0.0102622	0	0	0.0221086	0.0134592	0	0	0.107321	0	0.0134438	0.109045	0	0	0	0.005	0.488165	0.87205
TCGA.L5.A8NG.01	EPHA7-WT	0.266825	0	0.211519	0.0505626	0	0.147588	0	0.0510093	0.0004	0	0	0.0176246	0.0186792	0.0126109	0.042716	0.0743908	0	0.029239	0.0768024	0	0	0	0.005	0.540487	0.841028
TCGA.UY.A78K.01	EPHA7-MUT	0.0936807	0.10485	0.160183	0.135699	0	0.068069	0	0.100019	0.0369491	0	0	0.0193894	0.0117519	0.0151113	0.0732201	0.179883	0	0	0.00119418	0	0	0	0.005	0.513513	0.857475
TCGA.D3.A8GO.06	EPHA7-WT	0.278704	0	0.206076	0.134232	0	0	0.0219239	0.0858717	0.0302064	0	0	0	0	0.0887133	0.0155817	0.0840433	0	0	0.0532785	0	0	0.00136859	0.005	0.530608	0.848054
TCGA.L5.A43I.01	EPHA7-WT	0.124561	0	0.276536	0.0514457	0	0.159195	0	0.0515086	0.00114348	0	0	0.0219064	0	0.0104651	0.0213083	0.157747	0	0.0158946	0.108289	0	0	0	0.005	0.494601	0.869901
TCGA.60.2697.01	EPHA7-WT	0.0951208	0.0906946	0.175005	0.0957801	0	0.199831	0	0.0752738	0.00102684	0	0	0.0238481	0.0207546	0.001	0.0276112	0.135987	0	0.0110924	0.0470018	0	0	0	0.005	0.514119	0.857203
TCGA.MX.A5UG.01	EPHA7-WT	0.0881429	0.284141	0	0.0540706	0	0.241272	0.00382402	0.0447831	0.0222915	0	0.0127757	0	0.00814037	0.0484306	0.00646221	0.11132	0	0.0208085	0.0331801	0.0156702	0	0.00468735	0.005	0.488506	0.872066
TCGA.L5.A8NV.01	EPHA7-WT	0.162851	0	0.213417	0.0605969	0	0.156685	0	0.0332113	0.0109955	0	0	0.0162337	0.00720589	0.033112	0.0216887	0.185324	0.0024626	0.00229733	0.0937802	0.0001	0	0	0.005	0.505062	0.862388
TCGA.SY.A9G0.01	EPHA7-WT	0.360246	0	0.138417	0.0532642	0	0.0266986	0	0.0537668	0.00563037	0	0	0.0381273	0.0124335	0	0.00155461	0.136966	0	0.0141772	0.150868	0.00784994	0	0	0.005	0.50842	0.862225
TCGA.93.7348.01	EPHA7-WT	0.117931	0	0.316898	0.044642	0	0.126537	0.0037527	0.022513	0.0111574	0	0.003201	0	0	0.101664	0.0305512	0.198704	0	0	0.00530554	0.01587	0	0.00127219	0.005	0.525765	0.852813
TCGA.49.4501.01	EPHA7-WT	0.150079	0	0.19656	0.0670586	0	0.115063	0	0.0454672	0.0322274	0.0004	0	0.0293366	0.0245655	0	0.0209841	0.224493	0.0091956	0.02851	0.0536201	0	0	0.00246498	0.005	0.506067	0.862143
TCGA.FD.A6TA.01	EPHA7-WT	0.087092	0	0.263313	0.0756212	0	0.0690971	0.00308904	0.0585246	0.0437767	0	0.0174164	0.00599142	0.0188125	0.0377714	0.0694715	0.231788	0.00475531	0	0.0134801	0	0	0	0.005	0.484499	0.874889
TCGA.55.8203.01	EPHA7-WT	0.0709814	0.0286118	0.264658	0.0911305	0	0.11836	0	0.0884152	0.0340819	0	0	0.0129839	0.0104943	0.0254863	0.0594101	0.178324	0	0.00526961	0.0117936	0	0	0	0.005	0.507059	0.861585
TCGA.90.A4ED.01	EPHA7-MUT	0.171347	0	0.246953	0.0829602	0	0.0190455	0.00670378	0.0506982	0	0	0	0.0293546	0	0.0969192	0.0403499	0.243341	0	0	0.0123269	0	0	0	0.005	0.504872	0.863897
TCGA.FF.8061.01	EPHA7-WT	0.0404727	0.412988	0	0.105535	0	0	0.00533851	0.0457727	0.0212832	0	0	0	0	0.193099	0.0245319	0.141849	0	0	0.0091306	0	0	0	0.005	0.54305	0.839422
TCGA.22.4594.01	EPHA7-WT	0.0467068	0	0.389216	0.120691	0	0.0857177	0.00169496	0.00702547	0.037421	0	0.0007	0.00334786	0.00896253	0.0244295	0.0520704	0.167981	0.0420642	0	0.00359639	0	0	0.0083602	0.005	0.525548	0.8577
TCGA.K4.A83P.01	EPHA7-WT	0.21501	0.179455	0	0.056404	0	0.151726	0	0.0851214	0.0345042	0	0	0	0.0169684	0.0389014	0.0329955	0.176999	0	0	0	0.0119161	0	0	0.005	0.500281	0.865107
TCGA.D7.6527.01	EPHA7-WT	0.15283	0	0.21742	0.0560103	0	0.179604	0	0.0303732	0.0253993	0	0	0.00171984	0.0216303	0.11016	0.0597947	0.0927366	0	0.00261106	0.0254513	0	0	0.0242595	0.005	0.489058	0.871706
TCGA.EJ.A46H.01	EPHA7-WT	0.148694	0	0.302062	0.137276	0	0.182985	0	0.00991102	0.00156798	0	0	0.0473016	0.0193788	0	0	0.0651803	0	0.00920792	0	0.0764343	0	0	0.005	0.485496	0.882863
TCGA.AO.A0JC.01	EPHA7-WT	0.329417	0.0330056	0.0347086	0.152455	0	0.0915754	0	0.114706	0.0654207	0	0	0.0162129	0.00518611	0	0.02197	0.126326	0	0	0.00901592	0	0	0	0.005	0.507943	0.86096
TCGA.VQ.A8P8.01	EPHA7-WT	0.077744	0.317026	0.0284113	0.0684755	0	0.131981	0	0.0712862	0.0349334	0	0	0.0674527	0.0101478	0.0281876	0	0.0370211	0	0.0170749	0.110258	0	0	0	0.005	0.520301	0.85359
TCGA.A2.A3XZ.01	EPHA7-WT	0.234164	0	0.112963	0.0750886	0	0.0688403	0.0355557	0.0591349	0.0509593	0	0.0191303	0	0.0144656	0	0.0510438	0.229887	0.0220097	0	0.0267585	0	0	0	0.005	0.510678	0.860272
TCGA.35.3615.01	EPHA7-MUT	0.193273	0	0.151929	0.0773494	0	0.0730273	0	0.0564868	0.0153204	0	0	0.00993446	0.0171646	0.020762	0.0108243	0.293633	0.00365263	0.0234267	0.0436034	0	0	0.00961353	0.005	0.4911	0.870525
TCGA.EE.A2GL.06	EPHA7-WT	0.177178	0.251664	0.0005	0.102862	0	0.112575	0	0.13648	0.0164781	0	0	0.00481354	0.0147312	0.00535813	0.0329977	0.135477	0.0053151	0	0.00355043	0	0	0	0.005	0.505024	0.862476
TCGA.56.A4BY.01	EPHA7-WT	0.163194	0	0.236699	0.118337	0	0.0120944	0.0182865	0.0657869	0	0	0.0235534	0	0.0365897	0.0142088	0.0580682	0.179773	0	0	0.073409	0	0	0	0.005	0.51927	0.853837
TCGA.22.1005.01	EPHA7-WT	0.0465915	0.0363041	0.349183	0.160517	0	0.0483137	0	0.081422	0.0298268	0	0	0.0319422	0	0.032269	0.0803663	0.0818622	0	0.0033601	0.0164498	0	0	0.00159173	0.005	0.535245	0.849026
TCGA.MZ.A6I9.01	EPHA7-WT	0.115029	0	0.470501	0.0976928	0	0	0	0.0769946	0.0265902	0	0.0549683	0	0.0211734	0.025448	0.0157917	0.0600131	0	0.00752274	0	0.028275	0	0	0.005	0.54534	0.870053
TCGA.GR.A4D5.01	EPHA7-WT	0.0632827	0.26507	0	0.0748519	0	0.0573484	0.0004	0.0421199	0.0356367	0	0.0137597	0	0.00705886	0.216277	0.0866422	0.122607	0	0	0.0149288	0	0	0	0.005	0.490236	0.87116
TCGA.AX.A3G1.01	EPHA7-WT	0.0790083	0	0.300281	0.143607	0	0.091989	0.0211731	0.0658997	0.0162611	0	0	0.0445729	0.0118928	0.074132	0.0313642	0.100437	0	0.0139791	0.00366924	0	0	0.00173415	0.005	0.499402	0.868176
TCGA.E2.A15H.01	EPHA7-WT	0.226805	0	0.24586	0.162044	0	0.00788291	0	0.0423786	0.00859746	0	0.00361202	0	0.014195	0.0743948	0.043407	0.147177	0	0	0.0208832	0.00276176	0	0	0.005	0.489981	0.875949
TCGA.69.7764.01	EPHA7-WT	0.202546	0	0.19186	0.145133	0	0.160076	0	0.0391801	0.03257	0	0	0.0561255	0.013231	0.0190515	0.0498265	0.0719523	0	0.00707559	0.0113726	0	0	0	0.005	0.487203	0.874245
TCGA.EW.A1P7.01	EPHA7-WT	0.132876	0.173023	0.0592765	0.14228	0	0.157328	0	0.0649333	0.031636	0.0148006	0	0.00160641	0.0011188	0.0828864	0.0477573	0.0826661	0	0	0.00781126	0	0	0	0.005	0.506425	0.861638
TCGA.33.4547.01	EPHA7-WT	0.207632	0	0.212733	0.0230998	0	0.117183	0.014875	0.0217036	0.0216312	0	0.00592193	0	0.0155281	0.0384619	0.0122382	0.180933	0	0.0240997	0.0936577	0	0	0.0103022	0.005	0.512794	0.857841
TCGA.VP.A872.01	EPHA7-WT	0.279346	0	0.249938	0.0642192	0	0.100851	0	0.0908932	0.0130238	0	0	0.0423842	0.0200703	0.0287883	0	0.0599465	0	0.026539	0.0240018	0	0	0	0.005	0.53261	0.850652
TCGA.BR.A4J2.01	EPHA7-WT	0.322312	0.111002	0.0028158	0.0611257	0	0.178897	0	0.138714	0.0179171	0	0	0.00677743	0.0033048	0.0356984	0.00686761	0.0850844	0	0.00691811	0.0179646	0.00124514	0	0.0033555	0.005	0.4947	0.869781
TCGA.53.7813.01	EPHA7-WT	0.116922	0	0.377157	0.171534	0	0	0.0788931	0.0756637	0.0195137	0	0	0.0433815	0.0170453	0.0107375	0.0241779	0.0545382	0	0.00661718	0.0038192	0	0	0	0.005	0.543087	0.849614
TCGA.B6.A0IE.01	EPHA7-WT	0.0711748	0	0.419395	0.135619	0	0.0393653	0	0.0313373	0.0460699	0	0	0	0.0150097	0	0.0418411	0.117691	0	0	0.0824977	0	0	0	0.005	0.540453	0.85354
TCGA.77.8138.01	EPHA7-WT	0.205069	0	0.182792	0.0175711	0	0.00953903	0	0.038917	0.0165983	0	0.0458322	0	0	0.254741	0.0184205	0.150799	0	0	0	0.0597213	0	0	0.005	0.510057	0.859979
TCGA.BH.A0BA.01	EPHA7-WT	0.217704	0	0.227933	0.0844088	0	0.167671	0	0.0441819	0	0	0	0.0398857	0.0123879	0	0.0289541	0.104314	0.00168726	0	0.0708727	0	0	0	0.005	0.535491	0.84412
TCGA.55.7574.01	EPHA7-WT	0.151995	0.0613252	0.140208	0.117835	0	0.245112	0	0.0110295	0	0	0	0.0229078	0.00923554	0.02054	0.0255335	0.174233	0	0.00996866	0.0100773	0	0	0	0.005	0.490694	0.870552
TCGA.44.5644.01	EPHA7-WT	0.257468	0	0.285062	0.0964694	0	0	0.0309074	0.074315	0	0	0.0222841	0.00761139	0	0.0433183	0	0.085925	0	0.0551539	0	0.0197335	0	0.0217517	0.005	0.49723	0.878414
TCGA.50.5942.01	EPHA7-WT	0.125529	0	0.283354	0.0781997	0	0.167859	0	0.0243399	0.0009	0	0	0.0221815	0.0407575	0	0.0197385	0.101771	0.0399452	0.0001	0.0953112	0	0	0	0.005	0.526005	0.850184
TCGA.68.A59I.01	EPHA7-WT	0.128682	0.0229373	0.271101	0.0647819	0	0.0499779	0	0.0773099	0.00276399	0	0.00514839	0	0.0007	0.11164	0.0068656	0.227967	0	0.00425678	0.0221684	0.00208161	0	0.00166256	0.005	0.537688	0.84304
TCGA.EE.A2MG.06	EPHA7-MUT	0.283091	0.0452984	0.0659122	0.105422	0	0.115187	0	0.1023	0.0482552	0	0	0.0100968	0.0131246	0.0487084	0.0423913	0.120212	0	0	0	0	0	0	0.005	0.502189	0.863986
TCGA.FP.8210.01	EPHA7-WT	0.281059	0.113572	0.00655636	0.144492	0	0.0669901	0.00583143	0.0971141	0.0562203	0	0	0.0310128	0.00272196	0.00648496	0.0118105	0.0835738	0.00569747	0.0327113	0.0467581	0	0	0.0073934	0.005	0.492486	0.869724
TCGA.33.AASJ.01	EPHA7-WT	0.173968	0	0.252466	0.15051	0	0	0.0698059	0.0673268	0	0	0.00258573	0.00820936	0	0.118772	0.0445029	0.0715892	0	0.0008	0	0.033946	0.00401434	0.00145783	0.005	0.521112	0.853539
TCGA.22.0944.01	EPHA7-WT	0.193555	0	0.252764	0.0451703	0	0.00232703	0.00852899	0.0410738	0	0	0.0231192	0	0	0.20103	0.0220836	0.128138	0	0	0	0.0822101	0	0	0.005	0.482605	0.881065
TCGA.BR.6457.01	EPHA7-WT	0.147704	0	0.237337	0.128783	0	0.0791489	0	0.0818552	0.0245899	0	0	0.0340809	0.0144656	0	0.0419958	0.129331	0.0116494	0	0.0690587	0	0	0	0.005	0.5112	0.858838
TCGA.BR.8295.01	EPHA7-WT	0.298623	0	0.196651	0.041713	0	0.11401	0	0.143746	0	0	0.00505248	0	0.0118656	0.0695462	0.0189047	0.0901537	0	0	0	0.0097348	0	0	0.005	0.50672	0.865345
TCGA.05.4410.01	EPHA7-MUT	0.0489302	0	0.362004	0.14523	0	0.0599878	0.0114006	0.028294	0.0312008	0	0	0.0219281	0.00447743	0	0.0919325	0.169068	0	0	0.0213425	0	0	0.00420464	0.005	0.523316	0.8568
TCGA.FS.A1ZW.06	EPHA7-WT	0.00935626	0.0289571	0.394596	0.174977	0	0.0256774	0.0051231	0.0430882	0.0136605	0	0	0.0745764	0.0117887	0	0.0514157	0.148481	0.00186646	0	0.0164362	0	0	0	0.005	0.504974	0.875373
TCGA.22.4607.01	EPHA7-WT	0.192066	0	0.185179	0.0404386	0	0.0910861	0	0.0170199	0.0331079	0	0.0387456	0.0111606	0.0185851	0.0853306	0.0154503	0.202718	0.00636423	0.00369613	0.00900153	0.0195811	0	0.03047	0.005	0.517857	0.854924
TCGA.69.8253.01	EPHA7-WT	0.128667	0	0.355072	0.0288527	0	0.13507	0	0.0244523	0	0	0	0.0193567	0.0153086	0.00159592	0	0.204299	0.0275498	0.0387294	0.0147624	0	0	0.00628467	0.005	0.529008	0.854645
TCGA.78.7159.01	EPHA7-WT	0.169701	0	0.263539	0.0767383	0	0.0934727	0.0200581	0.0307452	0.0121952	0	0.0370229	0.00663535	0	0.0514992	0.0260067	0.135892	0	0.00311303	0	0.0541294	0	0.0192534	0.005	0.53055	0.84737
TCGA.33.6738.01	EPHA7-WT	0.160679	0	0.265453	0.0670053	0	0.0417231	0.00654017	0.0484615	0.0244781	0	0.0112177	0	0.0179413	0.172907	0.024264	0.154972	0	0	0.00315486	0.0012028	0	0	0.005	0.534867	0.845007
TCGA.62.A46P.01	EPHA7-WT	0.187843	0	0.295528	0.0815878	0	0	0	0.0441441	0.010198	0	0.0212088	0	0	0.0404885	0.0005	0.257734	0	0	0	0.0506733	0	0.0100667	0.005	0.495776	0.875666
TCGA.64.1678.01	EPHA7-WT	0.118773	0	0.355364	0.133512	0	0.0330063	0.113099	0.0134427	0	0	0.011132	0.0318026	0.00307944	0	0.001	0.134021	0	0.0214484	0.0303644	0	0	0	0.005	0.500124	0.875807
TCGA.49.4510.01	EPHA7-WT	0.135117	0	0.394657	0.0447812	0	0.0483874	0	0.0449432	0	0	0	0.0299617	0.0149953	0	0.00787741	0.221123	0.00300856	0.0126072	0.0369256	0	0	0.00561563	0.005	0.531965	0.860586
TCGA.75.7030.01	EPHA7-WT	0.0928367	0	0.29897	0.0914157	0	0.213299	0	0.00138245	0	0	0	0.00908004	0.00756679	0.0231582	0.0385802	0.123117	0.079481	0	0.0211124	0	0	0	0.005	0.514738	0.857792
TCGA.75.5146.01	EPHA7-WT	0.0944409	0	0.236793	0.0649415	0	0.15613	0	0.0600021	0	0	0	0.0261615	0.0111004	0	0.0274254	0.273467	0.00229153	0.00609132	0.0347682	0	0	0.00638721	0.005	0.485801	0.873441
TCGA.64.5779.01	EPHA7-WT	0.0849279	0	0.390086	0.0931877	0	0.244376	0	0.00300697	0.0267669	0	0	0.0149983	0.00257317	0.0485989	0.0375588	0.0539194	0	0	0	0	0	0	0.005	0.521998	0.866203
TCGA.L5.A8NE.01	EPHA7-WT	0.181873	0	0.223106	0.0487209	0	0.191867	0	0.0897738	0.024722	0	0	0.0662445	0.0188413	0	0.0224328	0.113836	0	0.00790388	0.0059102	0	0	0.00476909	0.005	0.488964	0.873492
TCGA.NC.A5HD.01	EPHA7-WT	0	0.0135763	0.517306	0.0363243	0	0.12195	0	0.0564054	0	0	0.0799311	0.00828085	0.0106328	0.00526879	0	0.00557257	0	0.128111	0	0.0129316	0	0.0037092	0.005	0.483976	0.926628
TCGA.86.8281.01	EPHA7-WT	0.11576	0	0.283476	0.049446	0	0.0686492	0	0.0795609	0.00342564	0	0	0.023677	0.0100605	0	0.0139352	0.279753	0.0138483	0.0252004	0.0332071	0	0	0	0.005	0.50636	0.862882
TCGA.58.8387.01	EPHA7-WT	0.0574492	0	0.33263	0.170634	0	0.048348	0.0007	0.0728594	0.0097153	0	0	0.0146533	0.00438876	0.0455154	0.0869935	0.130842	0.0143086	0	0	0.00657229	0	0.0044279	0.005	0.517233	0.858627
TCGA.CD.A4MH.01	EPHA7-WT	0.198243	0	0.323915	0.113006	0	0.135343	0.00352973	0.0596475	0.010241	0	0	0	0.0149328	0	0.0123283	0.0649939	0.00495485	0.013215	0	0.0434926	0	0.00211745	0.005	0.496103	0.882647
TCGA.66.2781.01	EPHA7-WT	0.192755	0	0.217794	0.0811381	0	0.0586986	0	0.0422629	0.0233079	0	0	0.030807	0.00543324	0.0148559	0.0101098	0.100963	0.0124667	0.0331269	0.0240833	0.0156119	0	0.136586	0.005	0.498916	0.866651
TCGA.58.8392.01	EPHA7-WT	0.225808	0	0.31099	0.0487045	0	0.0363672	0	0.0148515	0	0	0	0.0153897	0.0220619	0.112502	0.00804948	0.19376	0	0	0.00701043	0	0	0.00450535	0.005	0.521665	0.862872
TCGA.BH.A0DH.01	EPHA7-WT	0.167183	0	0.268831	0.0532029	0	0.0659921	0	0.0162008	0.0276569	0	0.00163694	0	0	0.14198	0.0312192	0.192942	0	0	0.0310357	0.0002	0	0.00189394	0.005	0.521729	0.853995
TCGA.50.5055.01	EPHA7-WT	0.0577559	0.138654	0.0957533	0.15681	0	0.0474455	0.00244081	0.0705875	0.0542289	0.00695844	0	0	0.00243675	0.0549366	0.0360672	0.213039	0.0489329	0.0018285	0.0121254	0	0	0	0.005	0.484154	0.875464
TCGA.94.8035.01	EPHA7-WT	0.235612	0	0.210288	0.0457174	0	0.0688805	0.00451588	0.0515223	0	0	0	0	0.0252541	0.117253	0.0172156	0.119358	0	0.00311048	0	0.0810125	0	0.0202607	0.005	0.52395	0.851383
TCGA.50.5946.01	EPHA7-WT	0.194006	0	0.209537	0.0848063	0	0.0307167	0.0261345	0.0244798	0.0193339	0	0	0.0311107	0.0160651	0.0145905	0.0379868	0.261021	0.00215123	0.00127198	0.0423096	0	0	0.00447961	0.005	0.511754	0.858376
TCGA.MP.A4TH.01	EPHA7-WT	0.0352686	0.154977	0.171366	0.0763809	0	0.190734	0	0.0624447	0.0359745	0	0	0.00870413	0.00401261	0	0.0298812	0.204174	0.00754223	0.00698985	0.0115509	0	0	0	0.005	0.526579	0.850175
TCGA.49.6743.01	EPHA7-WT	0.159117	0	0.191175	0.0691337	0	0.106249	0.00320461	0.0327347	0.00531973	0	0.00816515	0.0133062	0.0130342	0.104246	0.0734367	0.205038	0	0	0.0150163	0	0	0.0008	0.005	0.480423	0.876366
TCGA.CR.7389.01	EPHA7-WT	0.117827	0	0.211061	0.0571733	0	0.0863404	0.0111732	0.0603398	0.0523918	0	0.0060221	0	0.0572161	0	0.00400802	0.240379	0.0379204	0.0246886	0.0229645	0	0	0.0104954	0.005	0.48679	0.872886
TCGA.2H.A9GJ.01	EPHA7-WT	0.293127	0	0.22357	0.0513015	0	0.153483	0	0.00195596	0.0329625	0	0	0.0634219	0.017205	0.00203417	0	0.0738012	0	0.061883	0.0252537	0	0	0	0.005	0.48008	0.885141
TCGA.AC.A3BB.01	EPHA7-WT	0.18234	0	0.1849	0.121892	0	0.075278	0	0.119877	0.0108632	0	0	0.0264112	0.00886658	0.0124521	0.0311412	0.173638	0	0	0.0523406	0	0	0	0.005	0.507104	0.861095
TCGA.50.5072.01	EPHA7-WT	0.227479	0	0.201422	0.0406459	0	0.0816247	0	0.0763346	0.0173078	0	0	0	0.0201447	0.0223015	0.0178478	0.259384	0	0.0180407	0.00527345	0.00383295	0	0.0083608	0.005	0.502681	0.86444
TCGA.FF.8043.01	EPHA7-WT	0.0959797	0.232077	0.0834926	0.218535	0	0	0.0227133	0.0420577	0.0687263	0	0	0.00366412	0	0.148704	0.0145191	0.0581183	0	0.0037571	0	0.00765575	0	0	0.005	0.529546	0.847806
TCGA.50.8457.01	EPHA7-WT	0.125408	0	0.247408	0.0726032	0	0.112258	0	0.0443648	0.00542468	0	0	0.0158739	0.0535554	0	0.019852	0.243977	0.0171756	0	0.0420993	0	0	0	0.005	0.529747	0.847547
TCGA.95.7947.01	EPHA7-WT	0.236954	0	0.139107	0.078857	0	0.117915	0	0.0517668	0.0418431	0	0.0277013	0	0.029282	0.0249115	0.071195	0.149395	0	0.00317031	0.0279024	0	0	0	0.005	0.479267	0.876939
TCGA.QK.A8ZB.01	EPHA7-WT	0.148803	0	0.262485	0.029487	0	0.0752546	0	0.0336526	0.0133514	0	0.0606104	0	0	0.230189	0.0257324	0.028739	0	0	0	0.0829817	0	0.00871431	0.006	0.476609	0.883053
TCGA.FD.A43N.01	EPHA7-WT	0.189156	0	0.260004	0.0522607	0	0.0374145	0	0.0352941	0.0232134	0	0.0542638	0	0.0132747	0.0370987	0.0350085	0.13079	0	0.0657793	0	0.0524829	0	0.0139593	0.006	0.476879	0.882575
TCGA.55.7914.01	EPHA7-WT	0.0756717	0	0.269562	0.114822	0	0.150092	0.00279735	0.0328869	0.0532566	0	0	0.0330837	0.0105253	0.0115165	0.073584	0.117832	0	0.0001	0.0542904	0	0	0	0.006	0.477664	0.879419
TCGA.78.7161.01	EPHA7-WT	0.216526	0	0.26297	0.099562	0	0.0973236	0	0.0190797	0.0315202	0	0	0.0166458	0.0152429	0.0184599	0.00298338	0.159293	0	0.0387642	0.00943375	0	0	0.0121948	0.006	0.477816	0.884814
TCGA.BT.A20N.01	EPHA7-WT	0.252591	0	0.217139	0.0864654	0	0.00382431	0.00883389	0.111007	0	0	0	0	0.0166581	0	0.0692083	0.15921	0.0226001	0.0084398	0	0.0330044	0	0.0110179	0.006	0.476878	0.883046
TCGA.EJ.A7NG.01	EPHA7-WT	0.223049	0	0.266695	0.052389	0	0.103594	0	0.0952883	0	0	0	0.0472955	0.0253831	0.0244296	0.00254323	0.0800968	0	0	0.0792362	0	0	0	0.006	0.475695	0.887559
TCGA.ZF.AA5P.01	EPHA7-WT	0.269956	0	0.118871	0.0830459	0	0.015774	0	0.0953849	0	0	0.058514	0	0.0255745	0.00573766	0.0786369	0.156237	0	0.0193764	0.0160754	0.0568167	0	0	0.006	0.477838	0.877962
TCGA.FS.A1Z4.06	EPHA7-WT	0.169471	0.122928	0.0384268	0.0507694	0	0.117231	0	0.117784	0.0842068	0	0.0129951	0	0.0033245	0.0673878	0.0778416	0.131747	0	0	0.00588751	0	0	0	0.006	0.47565	0.878854
TCGA.56.7730.01	EPHA7-MUT	0.246927	0	0.206181	0.0924973	0	0.0660095	0	0.0113447	0	0	0	0.0124306	0.0378846	0.0364911	0.0389548	0.162519	0	0.0339001	0.0458491	0	0	0.00901196	0.006	0.477749	0.880226
TCGA.44.6148.01	EPHA7-WT	0.110147	0	0.232939	0.0513559	0	0.0751717	0	0.0461957	0	0	0	0.0367118	0.0536097	0	0	0.267186	0	0.00436312	0.121895	0	0	0.0004	0.006	0.476713	0.878652
TCGA.68.7756.01	EPHA7-WT	0.180412	0	0.177534	0.0581348	0	0.0397195	0	0.0450936	0.0167396	0	0.010534	0	0	0.172178	0.0129764	0.208219	0	0.0130283	0.0191536	0.0378204	0	0.00845735	0.006	0.477881	0.878076
TCGA.BR.A4J9.01	EPHA7-WT	0.0310317	0.295813	0.0245011	0.0885571	0	0.192406	0	0.0840216	0.0203885	0	0	0.0561995	0.0124439	0	0.0415462	0.144355	0	0.00377792	0.00495838	0	0	0	0.007	0.455717	0.889546
TCGA.AC.A2FK.01	EPHA7-WT	0.208968	0	0.138834	0.133639	0	0.0412871	0	0.0520518	0	0	0	0.0207267	0.0152262	0.0849949	0.0185854	0.169452	0.0005	0	0.115748	0	0	0	0.007	0.45362	0.890526
TCGA.39.5028.01	EPHA7-WT	0.0772093	0	0.197746	0.106748	0	0.0518096	0	0.045289	0.0201954	0	0.0162985	0.0332662	0.0260711	0.0514727	0.0738328	0.211616	0.0200142	0.0112316	0.0443141	0	0	0.0128853	0.007	0.441638	0.896476
TCGA.73.4662.01	EPHA7-WT	0.0990146	0	0.163252	0.0886496	0	0.210298	0.00715793	0.035101	0.00900425	0	0	0.0187169	0.0834463	0	0.00890636	0.193896	0.0438758	0.0246844	0.0139972	0	0	0	0.007	0.437127	0.898736
TCGA.55.6712.01	EPHA7-WT	0.160044	0	0.126303	0.155433	0	0.115992	0.02924	0	0.0253783	0	0	0	0	0.111865	0.0626177	0.190883	0	0	0.0193735	0.00287104	0	0	0.007	0.43983	0.89737
TCGA.49.AARE.01	EPHA7-WT	0.137845	0	0.178728	0.0654012	0	0.0409899	0	0.0971548	0.00692303	0	0.0123366	0	0	0.224937	0.0807213	0.14379	0	0	0.0111739	0	0	0	0.007	0.446162	0.895735
TCGA.A5.AB3J.01	EPHA7-WT	0.215948	0	0.181396	0.0574917	0	0.1742	0	0.11428	0.00211795	0	0	0.050176	0.00435262	0.0479586	0.00618724	0.126876	0	0	0.019016	0	0	0	0.007	0.43701	0.903145
TCGA.BL.A13I.01	EPHA7-WT	0	0	0	0.0373165	0	0.124002	0	0.0227277	0.0243747	0	0	0.0165996	0.00865318	0	0.0199478	0.655826	0	0	0.0717724	0.0178196	0	0.001	0.007	0.454801	0.892036
TCGA.EW.A1PE.01	EPHA7-WT	0.20144	0	0.133693	0.0745802	0	0.0566635	0.00827531	0.0446151	0.0128297	0	0	0.0192475	0	0.0368883	0.0862246	0.263585	0.00166724	0	0.036442	0	0	0.0238491	0.007	0.463004	0.885568
TCGA.18.4083.01	EPHA7-WT	0.0796102	0	0.201232	0.180891	0	0.0422126	0	0.0470975	0.0507895	0	0	0.0588011	0	0.0703487	0.0401394	0.189832	0.0004	0	0.0386024	0	0	0	0.007	0.44169	0.89697
TCGA.33.AASI.01	EPHA7-WT	0.176053	0	0.1451	0.145995	0	0.0359935	0.00237245	0.128463	0.0180941	0	0.0124351	0	0	0.0596908	0.156925	0.0729177	0	0.03637	0.00959105	0	0	0	0.007	0.455794	0.891659
TCGA.FF.8046.01	EPHA7-MUT	0.0933387	0.141769	0.0519381	0.152103	0	0	0.0586027	0.06995	0.0693058	0	0.0326174	0	0	0.163044	0.0417883	0.125543	0	0	0	0	0	0	0.007	0.455912	0.889402
TCGA.90.7769.01	EPHA7-WT	0.197124	0	0.201586	0.0724065	0	0	0.00751582	0.0783904	0.0055173	0	0.0170118	0	0.0319345	0.0777525	0	0.162323	0.00497409	0.0706297	0	0.0650368	0	0.00779757	0.007	0.467141	0.88456
TCGA.DQ.7596.01	EPHA7-WT	0.135464	0.174153	0.012033	0.127991	0	0.063214	0	0.111597	0.0534858	0.0104077	0.00214156	0	0	0	0.0784806	0.185086	0.00202746	0.0282672	0	0.0156505	0	0	0.007	0.438118	0.89847
TCGA.CN.4722.01	EPHA7-WT	0.0640673	0	0.303101	0.085685	0	0.116208	0	0.0451495	0.0154726	0	0	0.0229082	0.026903	0.015189	0	0.204467	0.0108161	0.0230896	0.064797	0	0	0.00214698	0.007	0.453656	0.895026
TCGA.05.4418.01	EPHA7-WT	0.163931	0	0.183134	0.12214	0	0.0753122	0.0339862	0.0369638	0.0257122	0	0	0.0295593	0	0.027515	0.0707675	0.203223	0.0005	0.00350839	0.0215148	0	0	0.00226709	0.007	0.473466	0.880118
TCGA.A8.A08O.01	EPHA7-WT	0.201535	0	0.159216	0.0706361	0	0.0690704	0	0.0344661	0.0185176	0	0	0.0423714	0.00766418	0.011649	0.0377301	0.21873	0.0265535	0	0.101496	0	0	0.0004	0.007	0.438787	0.898414
TCGA.XF.AAME.01	EPHA7-WT	0.14838	0	0.10672	0.10036	0	0.108403	0	0.0402155	0.0362251	0	0	0	0.0623835	0.00359798	0.00887588	0.258991	0.0383433	0.0269247	0.0523331	0.00824705	0	0	0.007	0.446973	0.894406
TCGA.44.7671.01	EPHA7-MUT	0.202348	0	0.193058	0.0474545	0	0.0382809	0	0.0512863	0.0143361	0	0.0239658	0	0.0136123	0.0399092	0	0.285338	0	0.0358058	0.0485552	0	0	0.00604922	0.007	0.464522	0.886056
TCGA.E9.A54Y.01	EPHA7-WT	0.141814	0	0.252895	0.0714539	0	0	0	0.114383	0	0	0.0314934	0	0.00405013	0.0182451	0.0152899	0.311852	0	0	0.00286667	0.0304658	0	0.00519167	0.007	0.4418	0.902402
TCGA.FP.8209.01	EPHA7-WT	0.270497	0.0918493	0	0.153656	0	0.171934	0.0169774	0.013203	0.0350042	0	0	0.0265257	0.0167708	0	0.0126626	0.137069	0	0.0105598	0.0432904	0	0	0	0.007	0.449718	0.893385
TCGA.60.2720.01	EPHA7-WT	0.163342	0	0.164634	0.0896045	0	0	0.0549263	0.0791259	0.0347976	0.00395676	0.0398193	0	0	0.177524	0.0533631	0.119376	0.00452952	0	0.0131284	0.00187216	0	0	0.007	0.469992	0.881906
TCGA.95.7043.01	EPHA7-WT	0.146364	0	0.198468	0.154755	0	0.0430404	0	0.0958092	0.00930695	0	0	0.0284009	0.00395003	0	0.0377184	0.247805	0.00246238	0.00966727	0.0222539	0	0	0	0.007	0.453301	0.891698
TCGA.AQ.A04J.01	EPHA7-WT	0.326119	0	0.0424203	0.0657681	0	0.217552	0	0.0386547	0.00345217	0.0006	0	0.00220916	0.00767648	0.105585	0.0465776	0.10915	0.00713104	0.00763024	0.019503	0	0	0	0.007	0.468911	0.882702
TCGA.NC.A5HM.01	EPHA7-WT	0.234958	0	0.13163	0.0290775	0	0.140199	0.0388519	0.0717228	0	0	0.0286074	0	0	0.150913	0.0519976	0.0981448	0	0	0	0.0238974	0	0	0.007	0.447914	0.894082
TCGA.51.4079.01	EPHA7-WT	0.0830388	0	0.226955	0.0957297	0	0.0526413	0	0.0422958	0	0	0	0.0376207	0.00584853	0.0290187	0.124344	0.231578	0.0165351	0.0281063	0	0.0191997	0	0.00708801	0.007	0.449818	0.894466
TCGA.CN.6021.01	EPHA7-WT	0.174195	0	0.202237	0.135776	0	0.062346	0	0.0429382	0.0548661	0	0.0196732	0	0.0429247	0	0	0.125259	0.00268363	0.0351825	0	0.0506672	0	0.0512508	0.007	0.471635	0.881646
TCGA.R6.A6DQ.01	EPHA7-WT	0.224585	0	0.148399	0.0533475	0	0.0836353	0.0150925	0.0880618	0.00264786	0	0	0.0318609	0.0228442	0	0.098487	0.10712	0.00150647	0.0600962	0.0235609	0.012072	0	0.0266831	0.007	0.444242	0.896831
TCGA.C8.A1HK.01	EPHA7-WT	0.133419	0	0.220615	0.0841286	0	0.0958052	0	0.03366	0.0312097	0.0155446	0	0.0585581	0	0.0300616	0.0545855	0.217378	0.0102243	0	0.0101545	0	0	0.00465653	0.007	0.446008	0.896354
TCGA.77.8133.01	EPHA7-WT	0.190776	0.086073	0.0255582	0.0374523	0	0.0657414	0	0.131227	0.019551	0	0	0.0192049	0	0.256956	0.0040734	0.133236	0	0.0106598	0.0194912	0	0	0	0.007	0.438812	0.898526
TCGA.IC.A6RE.01	EPHA7-WT	0.197873	0	0.128594	0.0876112	0	0.0863826	0	0.0914536	0.0668059	0	0	0	0.0161758	0	0.0177314	0.192512	0	0.0549039	0.0378409	0.0209074	0	0.001209	0.007	0.458664	0.887791
TCGA.98.A53H.01	EPHA7-WT	0.19172	0.0322521	0.0733969	0.0413218	0	0.118523	0	0.111766	0.00609099	0	0.0161442	0.00191	0.0183207	0.0740136	0.021589	0.256565	0	0.0194673	0.0169195	0	0	0	0.007	0.446278	0.894145
TCGA.EE.A3AA.06	EPHA7-MUT	0.192181	0.0979221	0.0277646	0.131845	0	0	0	0.167165	0.0336344	0	0	0.0133049	0.0123089	0.101024	0.0779531	0.144896	0	0	0	0	0	0	0.007	0.437235	0.898995
TCGA.CN.5355.01	EPHA7-WT	0.133053	0	0.229403	0.0225962	0	0.0656785	0	0.0383192	0.0213864	0	0.0598866	0	0.0159198	0.21885	0	0.124827	0	0.0113501	0	0.0559784	0	0.00275154	0.007	0.461908	0.888645
TCGA.55.8511.01	EPHA7-WT	0.0904428	0	0.225543	0.0883311	0	0.173104	0	0.0756812	0	0	0	0.0255005	0.0183332	0.037432	0.0715127	0.191653	0.00204046	0	0	0	0	0.0004	0.007	0.465617	0.884867
TCGA.77.A5GH.01	EPHA7-WT	0.0926881	0	0.214456	0.0940611	0	0.0828777	0	0.0650364	0.0337684	0	0.00703362	0.0283372	0.0172833	0.0435129	0.142048	0.118879	0.046893	0	0.0105451	0	0	0.00258006	0.007	0.454269	0.89144
TCGA.85.A511.01	EPHA7-WT	0.174954	0	0.108856	0.0744129	0	0.0934957	0.0391337	0.0402817	0.0186262	0	0.034358	0	0.0114637	0.157669	0.0474131	0.134405	0	0.0207159	0	0.0442151	0	0	0.007	0.441363	0.896524
TCGA.69.7765.01	EPHA7-WT	0.0152807	0.0231915	0.23757	0.0667229	0	0.160257	0.00853759	0.00278503	0.0128737	0	0	0.00514048	0.00448926	0.0309432	0.0548595	0.253681	0.093353	0.0140657	0.0162507	0	0	0	0.007	0.445171	0.895383
TCGA.05.4422.01	EPHA7-WT	0.125716	0	0.180121	0.226016	0	0.0883697	0	0.0428063	0.0440166	0	0	0.0594906	0.0203786	0.00648241	0.0429403	0.119882	0.0135908	0	0.0234327	0	0	0.00675633	0.007	0.448875	0.894069
TCGA.UF.A71D.01	EPHA7-WT	0.128509	0	0.295441	0.12403	0	0.0267394	0.0628701	0.0503885	0.00906184	0	0.0466527	0	0.0141909	0.0527308	0.0167347	0.133707	0	0.0290236	0.00992002	0	0	0	0.007	0.456916	0.89613
TCGA.38.7271.01	EPHA7-WT	0	0.25975	0.0196676	0.157157	0	0.15523	0	0	0.0472279	0	0	0.0180581	0.0158759	0.0231627	0.0291281	0.239462	0	0.00795773	0.0273234	0	0	0	0.007	0.445903	0.894482
TCGA.77.A5G7.01	EPHA7-WT	0.0895318	0	0.305253	0.147357	0	0	0.0649378	0.102773	0	0	0.0189847	0	0.0200301	0.0166104	0.0671951	0.114084	0	0.0532446	0	0	0	0	0.007	0.452229	0.899405
TCGA.BR.8296.01	EPHA7-WT	0.211603	0.147464	0	0.0759589	0	0.319085	0.0008	0	0.0418026	0	0	0.0211754	0.0213464	0.0221162	0.0243754	0.0676442	0	0.0150438	0.0315657	0	0	0	0.007	0.446972	0.895236
TCGA.FR.A8YE.06	EPHA7-WT	0.0915684	0.240402	0	0.0565563	0.071755	0.0292236	0.0332664	0.0655735	0.104504	0	0.0551175	0	0.0140812	0.0585535	0.0161921	0.150473	0	0	0	0.0127344	0	0	0.007	0.461568	0.88645
TCGA.21.5786.01	EPHA7-WT	0.0913618	0	0.20989	0.080638	0	0.0715888	0.00565402	0.0580913	0	0	0.0231426	0	0	0.162074	0.0531797	0.239395	0	0	0	0.00498546	0	0	0.007	0.443434	0.89717
TCGA.HU.8608.01	EPHA7-WT	0.135035	0	0.147123	0.109478	0	0.118287	0.0498107	0.0424486	0.0606618	0	0.032616	0	0.0180759	0.0001	0.131034	0.142018	0.00244959	0.00635204	0.0040252	0.0005	0	0	0.007	0.441759	0.897013
TCGA.85.7843.01	EPHA7-WT	0.157419	0	0.150031	0.041478	0	0.0801158	0	0.0373083	0.0234382	0	0.0354368	0	0	0.180521	0.0283836	0.1882	0	0	0	0.0776695	0	0	0.007	0.452838	0.891097
TCGA.AX.A2IN.01	EPHA7-WT	0.102802	0	0.231568	0.152715	0	0	0	0.114411	0	0.00266058	0	0.0857744	0.00940687	0.0360183	0.0619234	0.163708	0.0157406	0	0	0.0232719	0	0	0.007	0.465695	0.885678
TCGA.85.8481.01	EPHA7-WT	0.184875	0	0.111914	0.0386324	0	0.108301	0	0.036219	0	0	0.0438708	0	0.0100519	0.141294	0.0224033	0.22192	0	0.00291782	0	0.0687838	0	0.00881605	0.007	0.45002	0.892248
TCGA.BS.A0V7.01	EPHA7-WT	0	0.159965	0.167265	0.259143	0	0.0332696	0.0157368	0.110771	0.0396059	0	0	0	0.0472783	0	0.0100407	0.142621	0.0143034	0	0	0	0	0	0.007	0.442316	0.898013
TCGA.EE.A2M7.06	EPHA7-WT	0.0939241	0.233897	0.0310834	0.238259	0	0.0150774	0	0.065243	0.0726026	0	0.00348686	0.0180848	0.036652	0.00735399	0.010783	0.171824	0	0	0.00172821	0	0	0	0.007	0.454532	0.890483
TCGA.EE.A3JD.06	EPHA7-WT	0.086957	0.209021	0.0251463	0.167769	0	0	0.00728457	0.145341	0.0444012	0.0129001	0	0.0550215	0	0.00647004	0.143252	0.0806162	0	0	0.00977659	0	0	0.00603701	0.007	0.438278	0.900538
TCGA.LT.A5Z6.01	EPHA7-WT	0.143707	0	0.266597	0.151129	0	0	0	0.0846089	0.0159354	0	0	0.0323003	0.0109796	0.0926365	0.0110178	0.0870872	0	0.0172367	0.0867656	0	0	0	0.007	0.464365	0.889126
TCGA.HU.A4GY.01	EPHA7-MUT	0.154569	0.14886	0.00675235	0.0949519	0	0.226656	0.0270846	0.0104271	0.0229657	0	0	0	0.00220194	0.0412929	0.0558331	0.19821	0	0	0.0101958	0	0	0	0.007	0.4527	0.890886
TCGA.CV.7410.01	EPHA7-WT	0.268078	0.0680256	0	0.0605246	0	0.143795	0.00890242	0.092836	0.0759566	0	0.0105333	0	0.00422524	0.0295191	0.0601314	0.154839	0	0.00527345	0.0173602	0	0	0	0.007	0.459931	0.887269
TCGA.55.A48X.01	EPHA7-WT	0.0896651	0.206296	0.0156675	0.0758826	0	0.193499	0	0.0711702	0.0111373	0	0	0.0166403	0.0102257	0.0119812	0.0353975	0.223758	0	0	0.0386795	0	0	0	0.007	0.445244	0.894675
TCGA.ZF.A9R5.01	EPHA7-WT	0	0.25354	0.1046	0.188882	0	0.0735487	0	0.0837148	0.00687079	0	0	0.0362441	0.0216889	0.00280828	0.0226802	0.117904	0.0171493	0.0202233	0.050145	0	0	0	0.007	0.447584	0.893754
TCGA.DQ.7593.01	EPHA7-WT	0.163399	0.0325196	0.139114	0.114712	0	0.0738968	0	0.223406	0.0240248	0	0	0.0384753	0	0.0563138	0.0336383	0.0749995	0.0007	0.00655809	0	0.0182618	0	0	0.007	0.459673	0.888483
TCGA.CN.A6V1.01	EPHA7-WT	0.117298	0.0850419	0.0809886	0.199724	0	0	0.00112919	0.169627	0.0310189	0	0.0122817	0.00797567	0	0.116292	0.0393064	0.130035	0	0	0.0092826	0	0	0	0.007	0.455681	0.889336
TCGA.94.8491.01	EPHA7-WT	0.161862	0	0.153527	0.178392	0	0.0635191	0	0.0905124	0.0191153	0	0	0.0130253	0	0.00353953	0.0145921	0.272462	0.00751531	0.00867296	0.00805817	0	0	0.00520746	0.007	0.459894	0.887388
TCGA.62.8399.01	EPHA7-WT	0.124586	0	0.198659	0.10367	0	0.1329	0.00138293	0.0148473	0	0	0.0120046	0.00665487	0.103595	0	0.0204076	0.187805	0	0.0620785	0.00760521	0.0158497	0	0.00795403	0.007	0.440838	0.897341
TCGA.90.7766.01	EPHA7-WT	0.12354	0.030259	0.150221	0.0886678	0	0.0643575	0.00139469	0.069626	0.0534733	0	0	0.028137	0.0159006	0.0461389	0.0579865	0.23691	0	0.0188845	0.001725	0	0	0.0127778	0.007	0.439373	0.897655
TCGA.XF.A9SL.01	EPHA7-WT	0.258402	0	0.0740165	0.074261	0.00311147	0.0995743	0	0.0654981	0.0189932	0	0	0.0006	0.0755477	0	0	0.239397	0	0.0132136	0.0774075	0	0	0	0.007	0.43806	0.898323
TCGA.62.A46S.01	EPHA7-WT	0.140258	0	0.170263	0.108614	0	0.149885	0	0.0387948	0.022691	0	0	0.0394655	0.0616886	0	0.0305137	0.16718	0	0.00589362	0.0594932	0	0	0.00525947	0.007	0.45286	0.890806
TCGA.2H.A9GR.01	EPHA7-WT	0.219765	0	0.155811	0.065175	0	0.209314	0	0.0377353	0.0701188	0	0	0	0.0219399	0	0.0714379	0.0991376	0.0434345	0	0.0009	0.00523158	0	0	0.007	0.448462	0.894987
TCGA.20.1683.01	EPHA7-WT	0.00180844	0.0735447	0.339234	0.0832104	0	0.0405483	0	0.0705956	0.0107809	0.0040463	0	0.0231024	0.00856044	0.100941	0.0370513	0.165616	0	0	0.0409602	0	0	0	0.007	0.46137	0.896163
TCGA.94.A5I4.01	EPHA7-WT	0.156905	0	0.184741	0.0190034	0	0.036973	0	0.0430232	0.0263727	0	0.0362233	0	0.0003	0.242264	0.0121516	0.173374	0	0.00827602	0	0.0569039	0	0.00347635	0.007	0.444146	0.89811
TCGA.GM.A2DO.01	EPHA7-WT	0.247324	0	0.0714954	0.175796	0	0.119893	0.0206953	0.0670424	0.0254061	0.0709149	0	0	0	0.0567269	0.0411772	0.091867	0	0	0.0116623	0	0	0	0.007	0.458681	0.888433
TCGA.A1.A0SQ.01	EPHA7-WT	0.130392	0	0.249257	0.04813	0	0.0831331	0	0.0281384	0	0	0	0.0232079	0.0239948	0	0.0319091	0.276792	0.0116246	0	0.0841194	0	0	0.00930178	0.007	0.443433	0.898896
TCGA.DK.A3IL.01	EPHA7-WT	0.260567	0.0849345	0.0741815	0.0921228	0	0	0	0.179105	0	0	0	0.0566517	0.0126611	0.0487038	0.0167953	0.0807674	0	0.0502582	0.0432523	0	0	0	0.007	0.437812	0.900916
TCGA.GM.A3NY.01	EPHA7-WT	0.203269	0	0.144044	0.0959837	0	0.102473	0	0.148824	0	0	0	0.0479245	0.00486594	0	0.0680366	0.178224	0	0	0.00635457	0	0	0	0.007	0.44338	0.897127
TCGA.63.7022.01	EPHA7-WT	0.0417712	0	0.218421	0.0690645	0	0.151329	0.0179698	0	0.0242802	0	0	0.0323197	0.0192669	0.0246613	0.0361598	0.275247	0.0064628	0	0.0700834	0	0	0.0129638	0.007	0.460075	0.887226
TCGA.IN.8462.01	EPHA7-WT	0.210078	0	0.176387	0.0361103	0	0.0899303	0.0369851	0.0608312	0.0251643	0	0	0.0216191	0.00728727	0.0140289	0.079827	0.121947	0.0279776	0.00382976	0.0879966	0	0	0	0.007	0.456526	0.889629
TCGA.S5.A6DX.01	EPHA7-WT	0.149365	0	0.165954	0.194116	0	0	0.0251265	0.0387342	0.0377844	0	0	0.00813328	0.032429	0.00879184	0.102929	0.18692	0.0050543	0	0.0446634	0	0	0	0.007	0.445494	0.894947
TCGA.22.5479.01	EPHA7-WT	0.112784	0	0.223155	0.110223	0	0.0489159	0.00694116	0.0340708	0	0	0	0.067755	0.00579906	0.0406171	0.160045	0.177726	0.00927008	0	0.0006	0	0	0.00207544	0.007	0.458681	0.891655
TCGA.KK.A7AV.01	EPHA7-WT	0.146642	0	0.237924	0.0932151	0	0.148652	0	0.101808	0.00718483	0	0	0.0400114	0.00565798	0	0.0564859	0.0961725	0.00152376	0	0.0647217	0	0	0	0.007	0.47179	0.883438
TCGA.4Z.AA7R.01	EPHA7-WT	0.118854	0	0.285562	0.0110055	0.00973042	0	0	0.06633	0	0	0.0436913	0	0	0.0530212	0	0.299953	0	0.0347471	0	0.0723659	0	0.00473922	0.007	0.468619	0.888382
TCGA.55.7910.01	EPHA7-WT	0.0160763	0.0198836	0.306812	0.0400955	0	0.117894	0	0.101096	0.0240325	0	0	0.0158081	0.0209755	0.0980309	0.020741	0.117775	0	0.0843071	0.00795064	0.0002	0	0.00827405	0.007	0.438373	0.904122
TCGA.EJ.5531.01	EPHA7-MUT	0.179012	0	0.186307	0.0857275	0	0.0669892	0	0.0313049	0.00886104	0	0	0.0153163	0.0431632	0.176145	0.0051683	0.13177	0.0124606	0	0.0577758	0	0	0	0.007	0.445669	0.896046
TCGA.4B.A93V.01	EPHA7-WT	0.0693647	0	0.270344	0.0810747	0	0	0.0233155	0.0418784	0.00652897	0	0	0.0536805	0	0.313644	0.033145	0.0879196	0	0	0	0.0163429	0	0.00276163	0.007	0.454736	0.897002
TCGA.91.6849.01	EPHA7-WT	0.0511068	0.0370269	0.247693	0.0997888	0	0	0.0007	0.0474698	0.00569819	0	0	0.00272818	0	0.21109	0	0.250687	0	0.0363423	0.00648832	0	0	0.00317943	0.007	0.463908	0.888913
TCGA.GS.A9U3.01	EPHA7-WT	0.111345	0.0982956	0.0843321	0.100576	0	0.0392596	0.0271139	0.142542	0.0362447	0	0	0.0110675	0	0.196878	0.0967757	0.0555702	0	0	0	0	0	0	0.007	0.456248	0.889072
TCGA.XF.AAN0.01	EPHA7-WT	0.169311	0	0.166886	0.127184	0	0.0784322	0	0.111165	0.00626047	0	0	0.0433758	0.0163997	0	0.0829677	0.15622	0	0	0.0195075	0	0	0.0222911	0.007	0.442403	0.89733
TCGA.O2.A5IB.01	EPHA7-WT	0.247899	0	0.20341	0.0967544	0	0	0	0.077521	0.00815798	0	0	0.0330567	0.0134048	0.00436461	0.0424283	0.192599	0	0.0667578	0.0136463	0	0	0	0.007	0.467971	0.886923
TCGA.33.4533.01	EPHA7-WT	0.144594	0	0.240814	0.0906676	0	0.0100022	0	0.0429766	0	0	0	0.00840082	0.0264925	0.12277	0.00994325	0.100657	0.0789807	0.103855	0.0198463	0	0	0	0.007	0.457594	0.891011
TCGA.ZF.AA54.01	EPHA7-WT	0.00524066	0	0	0.0545493	0	0.0216931	0	0.0384997	0.0338066	0	0	0.0143407	0	0.11934	0.0422663	0.652907	0	0	0.0173574	0	0	0	0.007	0.451893	0.898082
TCGA.18.4086.01	EPHA7-WT	0.120577	0	0.161541	0.104607	0	0.0962347	0.0101369	0.00394117	0.0303233	0	0	0.0498968	0.0250702	0.0241479	0.0680771	0.209393	0.0335321	0	0.0565412	0	0	0.00597992	0.007	0.45677	0.888892
TCGA.CR.6482.01	EPHA7-WT	0.187202	0	0.0938015	0.0828573	0	0.13765	0.0122715	0.0735373	0.0473947	0	0.0372757	0	0.00813008	0.0172334	0.0951657	0.163464	0.0301172	0.00470395	0.00919588	0	0	0	0.007	0.44512	0.89465
TCGA.50.7109.01	EPHA7-WT	0.127009	0	0.182211	0.130347	0	0.139284	0.00425758	0.0619734	0.0142924	0	0	0.0255973	0.0107201	0.00372164	0.0700075	0.208362	0.00919312	0	0	0.00973245	0	0.00329174	0.007	0.460831	0.886921
TCGA.K4.AAQO.01	EPHA7-WT	0.169973	0	0.139696	0.0718629	0	0.0127373	0	0.026251	0.040906	0	0	0.0111646	0.066071	0	0.0532476	0.304297	0.00514551	0.00312579	0.0955225	0	0	0	0.007	0.446974	0.893773
TCGA.NJ.A4YF.01	EPHA7-WT	0.141261	0	0.197488	0.0495984	0	0.035377	0.00690002	0.0812283	0.0349303	0	0	0.0197087	0	0.199417	0.0269597	0.190682	0	0	0	0.0164496	0	0	0.007	0.472516	0.881314
TCGA.JY.A93C.01	EPHA7-WT	0.123054	0	0.229101	0.0928929	0	0.159794	0	0.00953723	0.0560133	0	0.0105142	0	0	0.0910257	0.0164573	0.143356	0	0.00658009	0	0.0547429	0	0.0069307	0.007	0.460278	0.888368
TCGA.85.8582.01	EPHA7-WT	0.169879	0	0.172808	0.0236481	0	0.0572999	0	0.0244118	0.0066669	0	0.0346812	0	0	0.324521	0.0415793	0.134852	0	0	0	0.00965398	0	0	0.007	0.455144	0.893536
TCGA.21.5783.01	EPHA7-WT	0.302577	0	0.0928683	0.045881	0	0.0396416	0	0.0373747	0.00655489	0	0	0.00155759	0	0.248861	0	0.167397	0	0	0	0.0572869	0	0	0.007	0.448055	0.897327
TCGA.EJ.7791.01	EPHA7-WT	0.215513	0	0.143603	0.103443	0	0.160326	0	0.0259636	0	0	0	0.047616	0.0374159	0.0208776	0.0287309	0.113567	0	0	0.102944	0	0	0	0.007	0.464996	0.884608
TCGA.UY.A78O.01	EPHA7-WT	0.0535052	0	0.352066	0.0296215	0	0	0	0.140253	0.00789133	0	0	0.0208496	0	0.2059	0.0007	0.110683	0	0.069524	0.00900894	0	0	0	0.007	0.43725	0.916201
TCGA.D8.A1JF.01	EPHA7-WT	0.0859323	0	0.224082	0.0915583	0	0.108808	0	0.0515248	0.00356701	0.00806163	0	0.0216051	0	0.027716	0.0664689	0.254917	0.0197422	0	0.0358699	0	0	0.0001	0.007	0.452035	0.89187
TCGA.J2.A4AE.01	EPHA7-WT	0.131502	0	0.173953	0.0756414	0	0.168121	0	0.0426227	0	0	0	0.0502462	0.001	0	0.0356251	0.291	0.0009	0.00646618	0.0112829	0.0114093	0	0.0002	0.007	0.458735	0.887861
TCGA.DK.A3IK.01	EPHA7-WT	0.0162281	0.204016	0.122895	0.122338	0.046196	0	0	0.0972974	0.0335911	0.0463436	0.011092	0	0.0254078	0.095598	0.0459667	0.0940003	0	0.0140431	0.02147	0.00351721	0	0	0.007	0.456275	0.889067
TCGA.73.4677.01	EPHA7-WT	0.0590517	0	0.244852	0.10521	0	0.154047	0.00773147	0.0248222	0	0	0	0.0142662	0.0132469	0	0.012152	0.302632	0.0179123	0.0185688	0.0166338	0	0	0.00887437	0.007	0.462598	0.886558
TCGA.BH.A208.01	EPHA7-WT	0.133046	0	0.208779	0.0811054	0	0.0301307	0	0.0264006	0.001	0.0005	0	0.0145612	0	0.0199224	0.0430521	0.329393	0.00234729	0.0388859	0.0709177	0	0	0	0.007	0.474579	0.879715
TCGA.BR.6803.01	EPHA7-WT	0.194762	0	0.143965	0.138621	0	0.189293	0	0.0711133	0.042279	0	0	0.034675	0.0116885	0	0.026875	0.108888	0.00802122	0	0.0297776	0	0	0	0.007	0.45894	0.888736
TCGA.A2.A1G0.01	EPHA7-WT	0.108394	0	0.19782	0.111392	0	0.137505	0	0.0265304	0	0	0	0.0398347	0.0222399	0	0.047526	0.197906	0.0613203	0	0.0421929	0.00733921	0	0	0.007	0.456685	0.888867
TCGA.QS.A8F1.01	EPHA7-WT	0	0.0855497	0.372635	0.0469055	0.0116914	0	0	0.0415872	0	0	0	0.0611897	0.0437553	0.0358872	0.00263794	0.204705	0	0	0.0934566	0	0	0	0.007	0.472729	0.894898
TCGA.98.A53C.01	EPHA7-WT	0.0268268	0.117108	0.121389	0.130308	0	0.204894	0	0	0	0	0	0.0132523	0.0308208	0.00485205	0.0252585	0.267675	0	0	0.0576152	0	0	0	0.007	0.446448	0.894291
TCGA.77.A5GF.01	EPHA7-WT	0.123955	0	0.18298	0.10636	0	0.0543046	0	0.0914244	0.0247489	0	0	0.0515181	0.00309214	0.0208069	0.0939754	0.214717	0	0	0.0321183	0	0	0	0.007	0.45529	0.889839
TCGA.2H.A9GK.01	EPHA7-WT	0.070638	0	0.214234	0.0343609	0	0.279869	0.00296371	0.0390357	0.0576084	0	0.0141609	0	0.00801456	0	0	0.103547	0.0270266	0.0692744	0	0.0769481	0	0.00231894	0.007	0.444775	0.895601
TCGA.FF.A7CR.01	EPHA7-WT	0.0589415	0.246098	0	0.13258	0	0	0.180949	0.0592426	0.0184097	0	0.012008	0.0007	0.0050454	0.00720474	0.147671	0.101881	0	0	0.0270481	0	0	0.00223151	0.007	0.458661	0.887783
TCGA.BA.A6DD.01	EPHA7-WT	0.096687	0	0.193978	0.173133	0	0	0.0471742	0.060895	0.0340813	0	0.0127844	0.0032199	0.00953099	0.0632894	0.14655	0.12461	0.0190956	0.00506114	0.00840608	0	0	0.00150377	0.007	0.446349	0.895518
TCGA.96.8169.01	EPHA7-WT	0.156326	0	0.142627	0.0885639	0	0.153805	0	0.0181062	0.0140766	0	0.0396377	0	0.0351699	0.0407497	0.0396737	0.205704	0.0354721	0.00327336	0	0.0144722	0	0.0123425	0.007	0.449505	0.892459
TCGA.33.A4WN.01	EPHA7-WT	0.120885	0	0.255026	0.0416424	0	0.0625622	0	0.0685709	0.0139586	0	0.00668373	0.00311806	0	0.192038	0.0260304	0.190969	0	0	0.0185155	0	0	0	0.007	0.470343	0.885141
TCGA.75.6212.01	EPHA7-WT	0.139008	0	0.161455	0.0141622	0	0.109524	0	0.0166068	0.00808434	0	0	0.0197551	0.00963227	0	0.00608821	0.332654	0.0734298	0.00962567	0.0925642	0	0	0.00740971	0.007	0.440292	0.897395
TCGA.FD.A6TB.01	EPHA7-WT	0.255473	0	0.0660032	0.171269	0	0.0412618	0	0.0961397	0.00648583	0	0	0.0680112	0.00921283	0.0441864	0.0623771	0.177046	0	0	0.00253359	0	0	0	0.007	0.444631	0.895581
TCGA.CV.7242.01	EPHA7-WT	0.104622	0	0.17017	0.157674	0	0.0655286	0.0343888	0.0341507	0.0480991	0	0	0.0623265	0.0184944	0.0590057	0.0530422	0.0739645	0.0194592	0	0.0990743	0	0	0	0.007	0.455138	0.889619
TCGA.56.8083.01	EPHA7-WT	0.353504	0	0.0710807	0.0255698	0	0.0801928	0	0.0941014	0	0	0	0.0696956	0.0300642	0.121194	0.00482001	0.0851171	0	0	0.0646604	0	0	0	0.007	0.456236	0.890734
TCGA.B6.A3ZX.01	EPHA7-WT	0.151763	0.162851	0.0260616	0.134077	0.00512526	0.117505	0	0.19557	0.0122857	0.0349344	0	0	0	0.057496	0.0222587	0.0730689	0	0.0008	0.00621906	0	0	0	0.007	0.472907	0.880969
TCGA.CN.4739.01	EPHA7-WT	0.065527	0.00177126	0.250443	0.209849	0	0.0880136	0	0.0938506	0.045729	0	0	0.0173833	0.0217894	0.0026497	0.0145245	0.0980163	0.00431536	0.00817391	0	0.0186662	0	0.0592976	0.007	0.459986	0.889827
TCGA.99.8025.01	EPHA7-WT	0.259684	0	0.127315	0.018082	0	0.0094364	0.0017069	0.0165168	0.0224433	0	0.0237351	0	0	0.177154	0	0.32211	0	0.0028977	0.00868182	0.00501705	0	0.00521942	0.007	0.452937	0.894867
TCGA.49.4486.01	EPHA7-WT	0.126498	0	0.242784	0.117034	0	0.0787928	0.0009	0.0812868	0	0	0	0.0261182	0.015518	0	0.0218788	0.226255	0.0005	0.0456093	0.015474	0	0	0.00131859	0.007	0.462386	0.887868
TCGA.NC.A5HQ.01	EPHA7-WT	0.156245	0	0.217804	0.0914895	0	0.104937	0	0.149871	0.00281254	0	0	0.0133699	0.00466897	0.00546603	0.0155749	0.165649	0	0.0657796	0	0.00633104	0	0	0.007	0.455135	0.892301
TCGA.CV.5432.01	EPHA7-WT	0.153151	0	0.281892	0.0943352	0	0.0344642	0.0419024	0.0324104	0.00279859	0	0.0121909	0.0200332	0.0158485	0.0407437	0.0578341	0.151427	0.0280485	0	0.0314624	0	0	0.00145697	0.007	0.473818	0.884629
TCGA.05.4432.01	EPHA7-WT	0.114703	0	0.199747	0.0941552	0	0.106313	0	0.0222591	0.0345422	0	0	0.0237218	0.00401899	0.101458	0.0782606	0.203941	0	0	0	0.00624486	0	0.0106351	0.007	0.464831	0.884869
TCGA.VQ.AA6F.01	EPHA7-WT	0.202917	0.0662391	0.101519	0.0760024	0	0.139972	0	0.0724159	0.0290843	0	0	0.0186255	0	0.0396986	0.121871	0.0726191	0	0.0055184	0.0535186	0	0	0	0.007	0.462006	0.88682
TCGA.77.8145.01	EPHA7-WT	0.135544	0	0.17733	0.0261121	0	0.123042	0	0.00198866	0.00486364	0	0.0242337	0	0	0.271579	0.0178821	0.184539	0	0.00965717	0	0.0232281	0	0	0.008	0.42215	0.910407
TCGA.73.4670.01	EPHA7-WT	0.127929	0	0.189855	0.0001	0	0.0373583	0.00966426	0.0691523	0.00982581	0	0.0259144	0	0.0203127	0.0274581	0	0.286971	0	0.0873311	0	0.0784552	0	0.0296966	0.008	0.430867	0.902715
TCGA.QK.A6IF.01	EPHA7-WT	0.140134	0.104432	0.0653182	0.114311	0	0.0934799	0	0.240837	0.040906	0	0	0.00597974	0	0.0398337	0.0704814	0.071194	0	0.00102386	0	0.0120698	0	0	0.008	0.431312	0.903791
TCGA.E2.A14X.01	EPHA7-WT	0.0627767	0.152958	0.104358	0.105167	0	0.123771	0	0.171268	0	0.0331325	0	0.0425566	0	0.0317743	0.0530301	0.119208	0	0	0	0	0	0	0.008	0.428328	0.904473
TCGA.95.A4VP.01	EPHA7-WT	0.23369	0	0.0917902	0.137263	0	0.114401	0.00641553	0.127329	0.0138244	0	0.0251611	0.00744038	0.0177843	0	0.0197062	0.191338	0	0.0112123	0	0.00264459	0	0	0.008	0.429911	0.903541
TCGA.CN.4742.01	EPHA7-WT	0.184917	0	0.120784	0.0175527	0	0.0602275	0	0.01947	0.0100394	0	0.0697102	0	0.00974525	0.320161	0.0115834	0.103014	0	0.00438878	0	0.0684068	0	0	0.008	0.425052	0.907992
TCGA.CV.A45W.01	EPHA7-WT	0.0208701	0.0210336	0.208153	0.142149	0	0.00158751	0.00894989	0.0581855	0.0339233	0	0	0.00147522	0.00243882	0.179234	0.0934585	0.228254	0	0	0.0003	0	0	0	0.008	0.432546	0.902891
TCGA.QK.A8Z8.01	EPHA7-WT	0.132267	0	0.205774	0.120295	0.0424993	0	0.00841197	0.0571295	0.0388425	0	0.0607352	0	0.0181722	0.0961631	0.022841	0.0758831	0	0.0725115	0	0.0484738	0	0	0.008	0.423509	0.907546
TCGA.G9.6339.01	EPHA7-WT	0.302952	0	0.120354	0.202098	0	0.0363842	0.00614566	0.058083	0.0125039	0	0	0.0328349	0.016442	0.0495843	0.0439257	0.0146932	0	0	0.103999	0	0	0	0.008	0.425931	0.910317
TCGA.VQ.AA6B.01	EPHA7-WT	0.215123	0	0.179892	0.0372205	0	0.204764	0	0.0652358	0.0471436	0	0	0.0165606	0.00752575	0.073863	0.030813	0.0778903	0.0158948	0.0251491	0	0.00292494	0	0	0.008	0.429772	0.90656
TCGA.A2.A3KD.01	EPHA7-WT	0.186746	0	0.159719	0.0547474	0	0.106161	0	0.0122641	0.0283432	0	0	0.0484263	0.0128312	0	0.0247656	0.285339	0.0147406	0	0.0286528	0.0339559	0	0.00330895	0.008	0.425468	0.905577
TCGA.91.6840.01	EPHA7-WT	0.203568	0	0.0974077	0.124885	0	0.124359	0	0.0469663	0.0110408	0	0	0.0455105	0.0263499	0.0599238	0.0828349	0.135595	0	0	0.0415599	0	0	0	0.008	0.43379	0.900393
TCGA.EB.A6L9.06	EPHA7-WT	0.206892	0	0.0764168	0.177473	0	0.0246981	0	0.130389	0.0785843	0	0	0.0135166	0.00452006	0.0702367	0.055399	0.157953	0	0	0.00392134	0	0	0	0.008	0.432995	0.901084
TCGA.EJ.7785.01	EPHA7-WT	0.127042	0	0.21214	0.0664795	0	0.144518	0	0.0475925	0	0	0	0.0224212	0.0482537	0.0137819	0.0273872	0.0962704	0.0675242	0	0.112037	0.0124109	0	0.00214227	0.008	0.430203	0.90313
TCGA.2H.A9GL.01	EPHA7-WT	0.211513	0	0.153977	0.0306122	0	0.191069	0	0.0763646	0.0146201	0	0	0.0455943	0.00100409	0.0475471	0.0873709	0.13967	0.0002	0	0.0005	0	0	0	0.008	0.427248	0.906391
TCGA.EW.A1P6.01	EPHA7-WT	0.150226	0	0.171988	0.09819	0	0.0657386	0	0.0493661	0	0	0	0.0315972	0.0009	0	0.0322204	0.32337	0	0	0.0723684	0	0	0.00406322	0.008	0.431745	0.902045
TCGA.77.A5FZ.01	EPHA7-WT	0.138366	0.0517787	0.0726839	0.101596	0	0.162859	0.0175899	0.0586606	0.0181557	0	0	0.0116813	0.0625932	0.0104031	0.0146007	0.257729	0	0.00248072	0.00237453	0.00135675	0	0.0150905	0.008	0.427833	0.903118
TCGA.CR.7388.01	EPHA7-WT	0.116192	0	0.148734	0.0969467	0	0.0815765	0.0400777	0.0478664	0.0251718	0	0.0488428	0	0.0382962	0.0244781	0.00365117	0.163561	0	0.0362184	0	0.0884782	0	0.0399089	0.008	0.427069	0.903384
TCGA.BR.4280.01	EPHA7-WT	0.170557	0	0.122516	0.0713762	0	0.142906	0.0622949	0.0329251	0.0190769	0	0.013866	0.0505346	0.0127404	0.0196625	0.0367616	0.169149	0.0128852	0.0006	0	0.0472477	0	0.014897	0.008	0.424041	0.905001
TCGA.24.0982.01	EPHA7-WT	0	0.13903	0.192493	0.121743	0	0	0	0.175468	0.0133679	0.0255872	0	0.0487691	0.0550885	0.0890429	0.0609719	0.0784398	0	0	0	0	0	0	0.008	0.425963	0.906467
TCGA.OL.A5RY.01	EPHA7-WT	0.210407	0	0.0615446	0.1075	0	0.140901	0	0.0934366	0.00319177	0.00922165	0	0.0282227	0	0	0.0556349	0.225343	0.0129067	0	0.051691	0	0	0	0.008	0.425466	0.904223
TCGA.ER.A199.06	EPHA7-WT	0.221892	0	0.0843232	0.255118	0	0	0.00797493	0.0950293	0.0733511	0	0	0.0549086	0.0448671	0.00224514	0.0361173	0.120554	0	0	0	0	0	0.00362011	0.008	0.427608	0.905525
TCGA.FD.A3B4.01	EPHA7-WT	0.222114	0	0.0803293	0.0848837	0	0.0571814	0	0.0833341	0.00159848	0	0	0.0706396	0	0.0823399	0.118129	0.124072	0	0.00681601	0.0685623	0	0	0	0.008	0.428404	0.903393
TCGA.D3.A1Q4.06	EPHA7-WT	0.15122	0	0.120647	0.0215345	0	0.100681	0	0.0413252	0.0103049	0	0	0.01106	0	0.162535	0.0378467	0.285143	0	0	0.0556474	0	0	0.00205457	0.008	0.423726	0.905773
TCGA.A6.5657.01	EPHA7-WT	0.427376	0	0	0.157363	0	0.0980289	0	0.111027	0.00775366	0	0	0	0.00994243	0.0399735	0.0469825	0.100057	0	0	0.00149591	0	0	0	0.008	0.433747	0.908563
TCGA.66.2742.01	EPHA7-WT	0.0790358	0	0.189555	0.056126	0	0.0660527	0	0.0413217	0.00141993	0	0	0.030135	0	0.0653545	0.0672965	0.261673	0.0116826	0	0.0329188	0	0	0.0974289	0.008	0.421785	0.906872
TCGA.91.A4BC.01	EPHA7-WT	0.0918885	0	0.147762	0.297046	0	0	0.114631	0.069588	0.00992539	0	0	0.0596245	0.0102979	0	0.0330884	0.105514	0.00250785	0	0.0522827	0	0	0.00584393	0.008	0.425333	0.905541
TCGA.NK.A5CX.01	EPHA7-WT	0.136576	0	0.143799	0.108345	0	0.0806507	0	0.0658613	0.00345285	0	0	0.0614917	0.0224713	0.02896	0.0835124	0.238747	0.00343801	0	0.00690826	0.00280019	0	0.012986	0.008	0.431032	0.901873
TCGA.VN.A88M.01	EPHA7-WT	0.00364007	0.0619942	0.3163	0.212345	0	0.0277056	0	0.125495	0	0	0	0.0538886	0.0150938	0	0.0243581	0.0931285	0	0	0.0660509	0	0	0	0.008	0.43342	0.913685
TCGA.UF.A718.01	EPHA7-WT	0.0754183	0	0.233068	0.0931075	0	0.0646522	0.0178381	0.122742	0.0130066	0.0001	0	0	0	0.124549	0.0808094	0.136489	0	0.0346773	0	0.00350474	0	0	0.008	0.423836	0.908557
TCGA.EE.A2GT.06	EPHA7-WT	0.243748	0	0.065533	0.107682	0.0045634	0.130198	0	0.130642	0.0185801	0	0.0157144	0.00131813	0.012107	0.0805905	0.0133307	0.174165	0.00182712	0	0	0	0	0	0.008	0.432901	0.901484
TCGA.55.6642.01	EPHA7-MUT	0	0.0165593	0.21913	0.12149	0	0.114765	0.0472371	0	0.010638	0	0	0.0178052	0	0.0924807	0.0260554	0.291039	0	0	0.0427995	0	0	0	0.008	0.424315	0.905885
TCGA.55.1595.01	EPHA7-WT	0.0811503	0	0.184875	0.0970833	0	0.082905	0	0.0554327	0.0422386	0	0	0.0414847	0.0008	0.0281195	0.059602	0.279609	0.0165865	0.00395998	0.0227772	0	0	0.00332983	0.008	0.432291	0.90125
TCGA.49.AARR.01	EPHA7-WT	0.137048	0	0.134104	0.121867	0	0.0497104	0	0.103269	0.0335946	0	0.027995	0.0136215	0.0326938	0.0125847	0.0106418	0.225849	0	0.0036963	0.0876013	0	0	0.00572207	0.008	0.435125	0.899595
TCGA.68.7757.01	EPHA7-WT	0.113237	0	0.16493	0.0280093	0	0.045222	0	0.0352395	0.023765	0	0.0568988	0	0	0.193759	0.00844216	0.205395	0	0.00483004	0	0.111374	0	0.00889855	0.008	0.423971	0.906778
TCGA.67.3771.01	EPHA7-MUT	0.0570095	0	0.192058	0.103529	0	0.0797106	0	0.037796	0.0155439	0	0	0.00806673	0.0438585	0.0467546	0.0698611	0.330001	0	0	0.0132396	0	0	0.00257204	0.008	0.426501	0.904572
TCGA.CG.4304.01	EPHA7-WT	0.0858086	0	0.193728	0.107904	0	0.168687	0	0.0116347	0.0200471	0	0.0103354	0	0.024587	0.00925129	0.0165036	0.137898	0.0202225	0.00468989	0	0.102009	0	0.0866936	0.008	0.433891	0.900561
TCGA.44.8117.01	EPHA7-WT	0.187485	0	0.104802	0.0686636	0	0.0651864	0	0.085563	0	0	0.0012544	0.0068226	0	0.176567	0.0482671	0.236698	0	0	0	0.018692	0	0	0.008	0.43603	0.899713
TCGA.QG.A5YW.01	EPHA7-WT	0.116703	0	0.215577	0.0354709	0	0.152857	0.0172273	0.0778032	0.00496504	0	0.0182209	0	0	0.105912	0.0245312	0.15321	0	0.0005	0	0.0770301	0	0	0.008	0.434316	0.901934
TCGA.EW.A424.01	EPHA7-WT	0.139098	0	0.21454	0.102306	0	0.0230378	0	0.0965015	0.00186907	0	0	0.0244465	0.0132746	0	0.0222111	0.225417	0.00704995	0	0.130248	0	0	0	0.008	0.428201	0.905265
TCGA.EE.A183.06	EPHA7-MUT	0.108282	0.112588	0.0540684	0.187121	0.00925848	0.0130109	0	0.0721293	0.0653061	0	0	0.0281179	0.0202884	0.141262	0.0176492	0.158117	0	0	0.0128014	0	0	0	0.008	0.423976	0.905084
TCGA.78.7163.01	EPHA7-WT	0.144124	0	0.209643	0.187092	0	0.11987	0	0.0806358	0.035347	0	0	0.0497197	0.0123416	0.009853	0.0158978	0.0877707	0.00531819	0.017595	0.0247918	0	0	0	0.008	0.424908	0.910746
TCGA.86.8669.01	EPHA7-WT	0.0714184	0	0.207999	0.0577672	0	0.167699	0	0.0249171	0.0218359	0	0	0.0271633	0.0576609	0.0322877	0.0222547	0.238516	0.0528557	0.00658642	0	0.0110391	0	0	0.008	0.43661	0.899331
TCGA.55.6968.01	EPHA7-WT	0.0632528	0	0.181515	0.0871584	0	0.064484	0.00952903	0.0588909	0.0226711	0	0	0.0520856	0.00469537	0.137989	0.110353	0.19067	0.0155222	0	0	0.00118369	0	0	0.008	0.425003	0.905516
TCGA.63.A5MS.01	EPHA7-WT	0.11047	0	0.150442	0.0820427	0	0.112994	0	0.046444	0.0202915	0	0	0.0391619	0	0.110339	0.0431529	0.268588	0.00149012	0	0.0145824	0	0	0	0.008	0.430932	0.901868
TCGA.E2.A576.01	EPHA7-WT	0.071629	0	0.228964	0.0856335	0	0.0117782	0	0.157279	0.00818387	0.0008	0	0.0689488	0.00540144	0	0.0335899	0.153813	0.00181706	0	0.17215	0	0	0	0.008	0.424844	0.90665
TCGA.62.A471.01	EPHA7-WT	0.129836	0	0.207836	0.149592	0	0.0720897	0	0.142702	0.0016677	0	0.00498449	0.0717972	0.0161284	0.0889804	0.0204641	0.055748	0	0.0200662	0	0.0125112	0	0.00559695	0.008	0.427107	0.908024
TCGA.63.A5MP.01	EPHA7-WT	0.161325	0	0.118516	0.077986	0	0.201347	0.0248141	0.0136821	0.00438833	0	0	0.00814583	0	0.085137	0.0558071	0.237645	0	0	0.0112071	0	0	0	0.008	0.436593	0.898967
TCGA.J2.A4AD.01	EPHA7-WT	0.153808	0	0.19352	0.0939697	0	0.0733523	0	0.0420594	0.0003	0	0.0315288	0	0.0139758	0.0682643	0	0.236066	0	0.0508895	0.041876	0	0	0.0004	0.008	0.435809	0.900597
TCGA.VQ.A8PD.01	EPHA7-WT	0.0238497	0.308717	0	0.0992816	0	0.350673	0	0	0.00676589	0	0.0177395	0	0.00405666	0.0353367	0.0752235	0.0177397	0.00727033	0.0252526	0.00491907	0.0175168	0	0.00565856	0.008	0.433307	0.902572
TCGA.AR.A0TT.01	EPHA7-WT	0.132705	0	0.12062	0.108254	0	0.137395	0	0.0776615	0.0262958	0.00463969	0	0	0	0.106662	0.073496	0.206475	0	0	0.00527856	0	0	0.0005	0.008	0.423236	0.905574
TCGA.L9.A743.01	EPHA7-WT	0.0661248	0	0.180619	0.0730499	0	0.172312	0.0643946	0.0616594	0	0	0.00565421	0.0004	0.0186492	0	0.0455163	0.245449	0.0255129	0.0302508	0.0100703	0	0	0.0004	0.008	0.421941	0.906122
TCGA.94.7033.01	EPHA7-WT	0.159993	0	0.176926	0.0952659	0	0	0	0.141197	0	0	0.00493083	0.0361457	0.0240724	0.0464854	0.0707193	0.137847	0	0.0848196	0.021598	0	0	0	0.008	0.428376	0.904607
TCGA.04.1341.01	EPHA7-WT	0	0.189765	0.155245	0.11499	0.0375404	0	0	0.0321249	0.029472	0.17549	0	0.0262772	0	0.0954021	0.0487469	0.0573201	0	0.00252042	0.0351064	0	0	0	0.008	0.427723	0.906124
TCGA.55.8090.01	EPHA7-WT	0.172116	0	0.116385	0.0520165	0	0.167844	0	0.0242323	0.00935219	0	0	0	0.0768868	0	0.0212011	0.275524	0.0483379	0	0.0320869	0	0	0.00401831	0.008	0.429742	0.902301
TCGA.77.6844.01	EPHA7-WT	0.208199	0	0.128062	0.104964	0	0	0	0.0820531	0.00563961	0	0	0.0481564	0.034705	0	0.0862332	0.196731	0.0241414	0.00308838	0.0742283	0	0	0.0037981	0.008	0.435664	0.899695
TCGA.CH.5751.01	EPHA7-WT	0.216007	0.0373909	0.0247709	0.191734	0	0.173615	0.00384459	0.0595876	0.0637472	0	0	0.0350669	0.016964	0.0163736	0.0238413	0.136352	0	0	0.0007	0	0	0	0.009	0.372661	0.933883
TCGA.Z7.A8R5.01	EPHA7-WT	0.186281	0	0.0640214	0.194417	0	0	0	0.118454	0.0177613	0	0	0.0164181	0.0324829	0.0361344	0.00934527	0.293243	0	0	0.0314414	0	0	0	0.009	0.366954	0.932166
TCGA.49.6744.01	EPHA7-WT	0.0800177	0	0.135603	0.0865221	0	0.164787	0.00694737	0.031134	0.0191008	0	0	0.0140644	0.0407352	0	0.024932	0.239697	0.0571408	0.0558689	0.0379565	0	0	0.00549416	0.009	0.393481	0.918705
TCGA.77.A5G6.01	EPHA7-WT	0.0961015	0	0.177934	0.117811	0	0.0704887	0	0.0528706	0.00654591	0	0	0.00970114	0.0858296	0	0.0247087	0.220077	0.014354	0.00375346	0.119825	0	0	0	0.009	0.406493	0.913489
TCGA.34.7107.01	EPHA7-WT	0.161886	0	0.0727593	0.0754212	0	0.136639	0	0.0430858	0.0463682	0	0	0.0243391	0	0.0655195	0.0469173	0.307499	0.00233126	0	0.017235	0	0	0	0.009	0.363207	0.933287
TCGA.D7.A4Z0.01	EPHA7-WT	0.262311	0	0.0429337	0.0273708	0	0.240819	0	0.0418107	0.00170065	0	0.00976103	0.00208968	0.0291892	0.0639222	0.00251343	0.131901	0.0196128	0.0311637	0.0862184	0.00147613	0	0.00520672	0.009	0.411744	0.910911
TCGA.SL.A6JA.01	EPHA7-WT	0	0.236687	0.0544296	0.192458	0	0.0292738	0	0.204138	0.0821521	0	0	0	0.0639778	0.0198689	0	0.0797424	0.0122567	0.0217684	0	0	0.00324759	0	0.009	0.354162	0.942726
TCGA.L9.A5IP.01	EPHA7-WT	0.0525999	0	0.261322	0.183789	0	0	0.0224342	0.0631404	0.050178	0	0.0559942	0.0603515	0.0320981	0.0773442	0	0.0961669	0	0.0062454	0	0.0126181	0.00285494	0.0228631	0.009	0.394569	0.928004
TCGA.CR.7374.01	EPHA7-WT	0.0298353	0	0.182355	0.081586	0	0.121768	0	0.0565865	0.0750142	0	0.0006	0	0.0155355	0	0	0.318497	0	0.0789695	0.0392612	0	0	0	0.009	0.372521	0.929729
TCGA.50.8460.01	EPHA7-WT	0.00187752	0.0369072	0.183954	0.0700815	0	0.0382134	0	0.0983822	0.0233702	0	0	0.0366408	0.103129	0	0	0.17118	0.100066	0.0452864	0.0909122	0	0	0	0.009	0.400648	0.915731
TCGA.43.3394.01	EPHA7-WT	0.131252	0	0.186827	0.0524403	0	0.0872016	0.00336662	0.0463626	0	0	0.0395292	0	0.00532457	0.107722	0.0108297	0.284364	0.0155021	0	0	0.0228314	0	0.00644682	0.009	0.408264	0.915429
TCGA.CR.7370.01	EPHA7-WT	0.0742535	0	0.165717	0.15583	0	0	0	0.0833646	0.00496481	0	0	0.0555696	0.0113106	0.0332816	0.113959	0.203128	0	0.0472404	0.0461921	0	0	0.00518895	0.009	0.378843	0.928172
TCGA.B6.A0RH.01	EPHA7-WT	0.129102	0	0.147629	0.0955881	0	0	0	0.0525239	0.0483488	0	0	0.0249445	0	0.0481942	0.0812489	0.246313	0	0.0393942	0.0862489	0	0	0.0005	0.009	0.391703	0.920718
TCGA.85.8353.01	EPHA7-WT	0.0798852	0	0.156693	0.0974042	0	0.170459	0.0224832	0.00384813	0	0	0.0524719	0	0	0.137402	0.0522726	0.173572	0.00365326	0	0	0.0498563	0	0	0.009	0.404503	0.914622
TCGA.55.A48Z.01	EPHA7-WT	0.141851	0	0.152668	0.00209084	0	0.00965136	0	0.0621225	0.0348185	0	0.0478147	0	0	0.320957	0.0410132	0.166696	0	0	0	0.0203164	0	0	0.009	0.417299	0.913433
TCGA.BT.A42F.01	EPHA7-WT	0.103356	0	0.116695	0.112938	0	0.032396	0.0282651	0.0774788	0.0176367	0	0.0814042	0	0.0193313	0.142131	0.03603	0.130517	0.0007	0.00557274	0	0.0955497	0	0	0.009	0.385209	0.923084
TCGA.97.7552.01	EPHA7-WT	0.11507	0.00381774	0.128889	0.269396	0	0.101966	0	0.0304624	0.0184666	0	0	0.0440507	0.00898974	0.049145	0.0919642	0.114177	0.0048351	0	0.0187704	0	0	0	0.009	0.411476	0.913054
TCGA.BH.A0H5.01	EPHA7-WT	0.0828914	0.0453433	0.0829274	0.267274	0	0.126639	0	0.0434652	0.0638716	0.0112713	0	0.0193679	0.006029	0.0514662	0.0614308	0.124725	0.00109879	0	0.0121986	0	0	0	0.009	0.378374	0.928939
TCGA.OK.A5Q2.01	EPHA7-WT	0.214791	0.00406954	0.0391613	0.11003	0	0.171957	0	0.121099	0.0450699	0	0	0.0271306	0	0.0344466	0.0407015	0.153622	0.010291	0	0.0223615	0	0	0.0052686	0.009	0.373926	0.930019
TCGA.J4.A67R.01	EPHA7-WT	0.117829	0.0232163	0.149582	0.13591	0	0.0401524	0	0.187602	0.0405172	0	0	0	0.0296853	0.00772244	0.0147913	0.204835	0	0	0	0.0481575	0	0	0.009	0.377603	0.929724
TCGA.DQ.7594.01	EPHA7-WT	0.173894	0	0.0997184	0.152265	0	0	0.00918004	0.186424	0.00949678	0	0.0215936	0	0.00433016	0.0006	0.200659	0.113669	0.00600211	0.00698529	0.0152219	0	0	0	0.009	0.396653	0.925817
TCGA.C8.A135.01	EPHA7-WT	0.102861	0	0.124279	0.180856	0	0.100683	0	0.0349974	0.0167874	0	0	0.00322125	0	0	0.0615316	0.335765	0.0100865	0	0.0243397	0	0	0.00459325	0.009	0.364991	0.933279
TCGA.BH.A0BJ.01	EPHA7-WT	0.126761	0	0.125542	0.108898	0	0.134493	0	0.0216171	0.0255333	0	0	0.00826323	0	0.118029	0.0235736	0.222677	0	0	0.0846136	0	0	0	0.009	0.401944	0.915458
TCGA.46.6025.01	EPHA7-WT	0.0470099	0	0.198816	0.125423	0	0.0156778	0.00653668	0.0413251	0.0116765	0	0.0129594	0.0099722	0.00255511	0.109582	0.0919947	0.234705	0	0.0436882	0	0.0480787	0	0	0.009	0.366712	0.935933
TCGA.VQ.A8PX.01	EPHA7-WT	0.132218	0	0.172046	0.153724	0	0.213933	0.0238405	0.0239474	0.0637017	0	0.0376541	0	0.017232	0	0.0261026	0.0477392	0	0.0227716	0	0.0558356	0	0.00925382	0.009	0.407171	0.917369
TCGA.NH.A6GC.01	EPHA7-WT	0.0112137	0.0792773	0.207624	0.0945664	0	0.167133	0	0.0254245	0.0790438	0	0	0.0847135	0.0364046	0.0694466	0	0.14257	0	0	0.0025835	0	0	0	0.009	0.381402	0.929971
TCGA.B6.A0RS.01	EPHA7-WT	0.163558	0	0.0796933	0.113123	0	0.1146	0	0.0702378	0.0004	0	0	0.0378372	0.00799239	0.0183951	0.0732834	0.30341	0	0	0	0.0174596	0	0	0.009	0.352496	0.938959
TCGA.33.AAS8.01	EPHA7-WT	0.258013	0	0.0581791	0.0872813	0	0.173039	0	0.0635156	0	0	0.0143526	0.0492086	0.0146377	0.0331896	0.0188244	0.206794	0.0196823	0.00256737	0	0.0007	0	0	0.009	0.373427	0.931266
TCGA.ZF.A9R9.01	EPHA7-WT	0.00263049	0.0187101	0.231255	0.104166	0	0	0	0.139795	0.0423305	0	0	0.00729772	0.0227878	0	0.0685659	0.322754	0.00246055	0.00437437	0.00334471	0.029527	0	0	0.009	0.353323	0.943717
TCGA.HU.A4GD.01	EPHA7-WT	0.128322	0	0.154855	0.0901314	0	0.0178093	0	0.215864	0.0344662	0	0	0.0408523	0.00257959	0	0	0.176021	0	0.0589305	0	0.0667534	0	0.0134144	0.009	0.353065	0.941191
TCGA.CC.5261.01	EPHA7-WT	0.243399	0	0.063585	0.0504248	0	0.240546	0.00175424	0.0626599	0.0268354	0	0	0.00677579	0.0118596	0	0.032147	0.139656	0.106682	0	0.0136757	0	0	0	0.009	0.368396	0.932678
TCGA.37.5819.01	EPHA7-WT	0	0.029957	0.17974	0.211301	0	0.0973915	0	0.0979521	0.0346958	0	0	0.0582984	0	0.0488601	0.0619882	0.178628	0	0	0.00118772	0	0	0	0.009	0.354943	0.941836
TCGA.FW.A3TU.06	EPHA7-MUT	0.0444807	0	0.230507	0.192782	0	0.0303098	0	0.0614705	0.0511134	0	0	0.0513949	0.057723	0.179717	0.00746543	0.0880811	0	0	0	0.00495478	0	0	0.009	0.409472	0.916021
TCGA.GN.A9SD.06	EPHA7-MUT	0.21873	0	0.0698888	0.170633	0	0.0555272	0.00465507	0.180765	0.0359492	0	0	0.00658986	0.0265827	0.0255842	0.0509525	0.14947	0	0	0	0.00467257	0	0	0.009	0.400329	0.918527
TCGA.AR.A5QP.01	EPHA7-WT	0.0771842	0	0.137665	0.186319	0	0.0138709	0	0.0705484	0.0386487	0	0.0137072	0	0.0337508	0.0642905	0.0706547	0.238476	0.0141015	0	0	0.040783	0	0	0.009	0.361871	0.934049
TCGA.OL.A66P.01	EPHA7-WT	0	0.0882639	0.107896	0.243761	0	0	0	0.106949	0.0248465	0.0139845	0	0.0674457	0.0143878	0.0572261	0.0568978	0.138323	0.0198929	0	0.0601254	0	0	0	0.009	0.373415	0.928783
TCGA.55.7573.01	EPHA7-WT	0.114997	0.0401738	0.064195	0.0464418	0	0.2189	0	0.0888245	0.00251664	0	0.010331	0.0103525	0.0181341	0	0.0470619	0.170815	0.116847	0.0061002	0.044309	0	0	0	0.009	0.364777	0.931025
TCGA.N5.A4RA.01	EPHA7-WT	0	0.215975	0.0959657	0.221892	0	0	0	0.076201	0.0428728	0	0	0.0697774	0.0361789	0.140454	0.00421425	0	0	0	0	0.0832427	0	0.0132266	0.009	0.385018	0.926584
TCGA.D7.A747.01	EPHA7-WT	0.156892	0.126964	0	0.0787943	0	0.263666	0	0.0595031	0.066602	0	0	0.0360541	0.00321642	0	0.0200238	0.0994126	0	0.0104923	0.0783793	0	0	0	0.009	0.385604	0.925239
TCGA.55.8204.01	EPHA7-WT	0	0.00734947	0.218215	0.0799114	0	0.0948488	0	0.00508389	0	0	0	0.054452	0.0147324	0.0295632	0.155447	0.221968	0.0195869	0	0.079412	0	0	0.0194296	0.009	0.379477	0.930234
TCGA.AX.A3FX.01	EPHA7-WT	0.0291013	0	0.227489	0.0387731	0	0.189245	0	0.0787572	0.0461644	0	0.0187658	0	0.0242339	0.199671	0.0293994	0.118365	0	0	0	0	0	0	0.009	0.367599	0.937399
TCGA.BH.A0DO.01	EPHA7-WT	0.216194	0	0.102675	0.069542	0	0.0287154	0	0.0782978	0	0	0	0.0170722	0	0.169468	0.0191142	0.241163	0	0	0.0407606	0.0169975	0	0	0.009	0.415225	0.910704
TCGA.CK.6747.01	EPHA7-WT	0.141941	0	0.126947	0.088262	0	0.238412	0.0111705	0.0507722	0.0335785	0	0.00976113	0	0.0123108	0.0192915	0.0921453	0.121018	0.0543898	0	0	0	0	0	0.009	0.364889	0.934953
TCGA.95.7567.01	EPHA7-WT	0.0981894	0	0.163673	0.126455	0	0.0785661	0.007948	0.0220279	0.0546414	0	0	0.049744	0	0	0.0504289	0.302317	0.018773	0.00794986	0.0149309	0	0	0.00435643	0.009	0.419578	0.907459
TCGA.CN.A63U.01	EPHA7-WT	0	0.0628223	0.210873	0.0346755	0	0	0	0.188905	0	0	0.091222	0	0.0236549	0.103921	0.05232	0.0829857	0	0.0199468	0.0422953	0.0823987	0	0.00397946	0.009	0.378936	0.92891
TCGA.55.A48Y.01	EPHA7-WT	0.079098	0	0.191193	0.0430504	0	0.0956596	0	0.0412348	0.0317213	0.00371318	0	0.0175398	0.00201033	0.162198	0.0458093	0.274418	0	0	0.00515356	0	0	0.00720109	0.009	0.415317	0.911411
TCGA.NJ.A55A.01	EPHA7-WT	0.0939591	0.112634	0.0509326	0.0650323	0	0.191979	0	0.112193	0	0	0	0.0326492	0.00980493	0	0.0335179	0.17757	0.0485464	0.00288348	0.0682983	0	0	0	0.009	0.409901	0.911405
TCGA.56.7580.01	EPHA7-WT	0.0571973	0	0.181775	0.0680087	0	0.0824538	0	0.0405107	0.0067657	0	0.046401	0	0	0.15307	0.017118	0.213823	0	0	0	0.122442	0	0.0104357	0.009	0.36407	0.936307
TCGA.J2.A4AG.01	EPHA7-WT	0.206998	0	0.0497137	0.0864045	0	0.161476	0.0171958	0.0367074	0.0373472	0	0.0167237	0	0.0466269	0	0.00515714	0.23026	0	0.029835	0	0.0755551	0	0	0.009	0.381193	0.924665
TCGA.86.7955.01	EPHA7-WT	0.0775268	0	0.19895	0.220527	0	0	0	0.0856912	0.0299621	0	0	0	0.0267906	0.0614491	0.0901163	0.16352	0	0.021662	0.0235826	0.0002	0	0	0.009	0.367184	0.936089
TCGA.D6.A74Q.01	EPHA7-WT	0.00154649	0	0.25488	0.159301	0	0	0.0273119	0.223424	0.0113723	0	0	0.0261513	0.00731902	0.0595194	0.0287667	0.0925932	0.0172473	0.0242598	0.0270073	0.0299429	0	0.00935669	0.009	0.406442	0.917766
TCGA.BR.4369.01	EPHA7-WT	0.112155	0	0.162196	0.0604662	0	0.267145	0.0198364	0.0313337	0.0326994	0	0	0.00426982	0.0119073	0	0.0355078	0.144291	0.0833677	0	0.0322384	0.00258616	0	0	0.009	0.388358	0.922735
TCGA.55.6979.01	EPHA7-WT	0.0967088	0	0.116219	0.123581	0	0.0886292	0.0138253	0.0442063	0.0240845	0	0	0.0457597	0.0233377	0.0275537	0.106196	0.253901	0.00956533	0	0.0264326	0	0	0	0.009	0.39186	0.920009
TCGA.62.8398.01	EPHA7-WT	0.106858	0	0.146811	0.0282426	0	0.160017	0.00781472	0.0465145	0.0131572	0	0.0190474	0.00848028	0.0410512	0.0926954	0.0795401	0.201249	0.018378	0	0.0153853	0	0	0.0147595	0.009	0.381075	0.925282
TCGA.L9.A443.01	EPHA7-WT	0.112207	0	0.190236	0.122781	0	0.0961491	0	0.0947736	0	0	0	0.0316597	0.00803367	0.0110435	0.0650917	0.226637	0.0137745	0	0.0276133	0	0	0	0.009	0.403919	0.916697
TCGA.BH.A0HK.01	EPHA7-WT	0.0973806	0	0.131818	0.070477	0	0.0891608	0	0.0582945	0.0322125	0.00212555	0	0.0440825	0.0279264	0	0.066976	0.288324	0.0700444	0	0.0190832	0	0	0.00209407	0.009	0.360542	0.934029
TCGA.A8.A08X.01	EPHA7-WT	0.00280887	0.00781977	0.195928	0.0632599	0	0.128127	0	0.0798866	0.03277	0	0	0.0398851	0.00250324	0.0670476	0.0662294	0.272602	0	0.00179531	0.0384418	0	0	0.0009	0.009	0.381007	0.92618
TCGA.BT.A42C.01	EPHA7-WT	0	0.178554	0.137625	0.0663007	0	0	0	0.201428	0.0351984	0	0	0	0.0462986	0	0	0.0930573	0	0.182113	0	0.0594254	0	0	0.009	0.403597	0.915928
TCGA.21.1082.01	EPHA7-WT	0.0500052	0	0.163938	0.107014	0	0.151387	0	0.0997948	0.00504195	0	0.0005	0.016502	0.00771635	0.0792144	0.0258321	0.208487	0.0324787	0.042289	0.00977022	0	0	0	0.009	0.386615	0.922918
TCGA.A2.A4RY.01	EPHA7-WT	0.250033	0	0.0647068	0.0882634	0	0.128046	0	0.109689	0	0	0	0.0322217	0.0531323	0.0008	0.0303136	0.171074	0	0	0.071703	0	0	0	0.009	0.405426	0.914357
TCGA.EW.A6SB.01	EPHA7-WT	0	0.0532564	0.183413	0.0936459	0	0.117702	0.0175487	0.17521	0.0472743	0	0	0.0676648	0.00170502	0.0410403	0.059031	0.0972164	0.0325504	0	0	0.0127415	0	0	0.009	0.399657	0.918876
TCGA.D6.6827.01	EPHA7-WT	0.140904	0	0.114544	0.0533385	0	0.094565	0.0002	0.0628832	0.0206607	0	0.0008	0	0.0138517	0.0894556	0.0804678	0.215449	0.0797445	0	0.0330707	0	0	0	0.009	0.35714	0.936018
TCGA.BT.A20P.01	EPHA7-WT	0	0.203669	0.0554971	0.13329	0	0.110737	0	0.0271997	0	0	0	0.0495658	0.0824032	0	0	0.192231	0	0.0794862	0	0.0659209	0	0	0.009	0.3517	0.937276
TCGA.98.A53A.01	EPHA7-WT	0.115177	0	0.174536	0.173305	0	0.12182	0.00892084	0.108038	0.00184888	0	0	0.0804935	0.0159827	0	0.0353837	0.1321	0	0	0.0323938	0	0	0	0.009	0.417486	0.911032
TCGA.J1.A4AH.01	EPHA7-MUT	0.0615281	0.0559585	0.127355	0.0379778	0	0.0297954	0	0.0920842	0.00771793	0	0	0.0253519	0	0.199185	0.0262692	0.307283	0	0	0.0294946	0	0	0	0.009	0.368236	0.934548
TCGA.78.7162.01	EPHA7-WT	0.0897571	0	0.139192	0.115684	0	0.183056	0	0.0505956	0.0109814	0	0	0.0422359	0.00132105	0.00182881	0.0443859	0.245442	0.00260759	0.0185397	0.0543736	0	0	0	0.009	0.388194	0.921801
TCGA.FD.A5BU.01	EPHA7-WT	0.113182	0	0.152713	0.0616127	0	0.108075	0.0226599	0.0452643	0.0287154	0	0.0881018	0	0.0402934	0.0580315	0.0675928	0.118269	0.0810825	0	0.00303631	0.007687	0	0.00368278	0.009	0.392855	0.919617
TCGA.AO.A03M.01	EPHA7-WT	0.115614	0	0.117716	0.165168	0	0.114102	0	0.0945876	0.0325173	0	0	0.0484063	0.0125375	0.0142649	0.0901859	0.120621	0.0180609	0	0.0552075	0	0	0.0010112	0.009	0.381481	0.925899
TCGA.22.4601.01	EPHA7-WT	0.123021	0	0.115814	0.0840009	0	0.0405141	0.00344154	0.0727409	0.00344861	0	0	0.0539837	0.0206368	0.00338384	0.0507679	0.342534	0	0.0430764	0.0426353	0	0	0	0.009	0.378853	0.925995
TCGA.AA.3489.01	EPHA7-WT	0.150804	0.0925546	0.0111772	0.0856058	0	0.0903736	0	0.0657789	0.00416756	0	0.0107519	0	0.0486851	0.0415108	0.0523312	0.299023	0	0	0.01397	0.0261313	0	0.00713527	0.009	0.380014	0.925293
TCGA.CH.5765.01	EPHA7-WT	0.123039	0	0.148283	0.129756	0	0.0974702	0	0.0400398	0.0087693	0	0	0.0499783	0.0669979	0.0715202	0.0436153	0.138755	0.0100748	0	0.0717017	0	0	0	0.009	0.35856	0.935601
TCGA.FD.A3B3.01	EPHA7-WT	0.0698161	0	0.133164	0.165153	0	0.0606351	0.0350505	0.122469	0	0	0.00104033	0.050333	0.0192103	0.0875808	0.149944	0.0884013	0.0061488	0.0006	0.00983485	0.0005	0	0.0001	0.009	0.354306	0.941419
TCGA.63.A5MV.01	EPHA7-WT	0.101625	0	0.140417	0.0600502	0	0.0495568	0.00528785	0.030099	0.00456916	0	0	0.0129111	0.001	0.15309	0	0.410067	0	0.00811488	0.0232223	0	0	0	0.009	0.385346	0.928222
TCGA.DK.A6B2.01	EPHA7-WT	0.113018	0	0.142592	0.102566	0	0.0342975	0.00312882	0.0227332	0.0546979	0	0	0.0235034	0.034611	0	0.11237	0.28658	0.0177437	0.0150412	0.0371167	0	0	0	0.009	0.414307	0.909954
TCGA.L9.A8F4.01	EPHA7-WT	0.0707219	0	0.176898	0.115964	0	0.15386	0.0001	0.0732843	0.0691748	0	0	0.0332322	0.00237463	0.0598882	0.0457989	0.196495	0	0	0	0.00224118	0	0	0.009	0.413704	0.911012
TCGA.EJ.5503.01	EPHA7-WT	0.0241706	0.0892369	0.142573	0.156319	0	0.132852	0	0.0579663	0.0124885	0	0	0.0499389	0.0212249	0.0296883	0.0181438	0.130358	0.0001	0.00763344	0.117454	0	0	0.00986966	0.009	0.363893	0.933357
TCGA.56.7731.01	EPHA7-WT	0.0758674	0	0.166028	0.0306498	0	0.174788	0	0	0.00179632	0	0.0209768	0	0.0687485	0.0388263	0.0105049	0.376695	0	0.0142693	0.00763042	0.00281729	0	0.010401	0.009	0.386928	0.924239
TCGA.GN.A4U4.06	EPHA7-WT	0.0868396	0.212887	0.00411675	0.17563	0	0.0222048	0	0.132549	0.0196095	0	0	0.0405454	0.0329877	0	0.0734116	0.171618	0	0	0.0276007	0	0	0	0.009	0.366064	0.933856
TCGA.38.4631.01	EPHA7-WT	0.154037	0	0.135402	0.0273612	0	0.0131533	0.0131748	0.0398343	0	0	0.0243956	0.0293607	0.045456	0.145075	0.0555203	0.155571	0	0	0	0.0923096	0	0.0693488	0.009	0.376818	0.929834
TCGA.AO.A03V.01	EPHA7-WT	0.261185	0	0.101579	0.183074	0	0.0713404	0	0.0711527	0.0162008	0	0	0	0.01934	0.0286009	0.0762342	0.166179	0	0	0.00511459	0	0	0	0.009	0.415534	0.912518
TCGA.90.6837.01	EPHA7-WT	0.0917107	0	0.151609	0.0659511	0	0.101132	0	0.0587363	0.0298856	0	0.0423505	0	0.0333935	0.102603	0.023466	0.191931	0.0185804	0	0	0.0729688	0	0.0156833	0.009	0.416907	0.908276
TCGA.24.1930.01	EPHA7-WT	0.124308	0	0.116117	0.0419546	0	0.120209	0	0.035954	0.00605247	0	0	0.028342	0.0103715	0.00744214	0.0635209	0.42023	0	0	0	0.0220509	0	0.00344612	0.009	0.360639	0.936552
TCGA.CF.A1HR.01	EPHA7-WT	0.00660273	0.0345205	0.234533	0.194772	0	0	0.00714173	0.0574419	0.04408	0	0	0.0751696	0.0246692	0	0.00464956	0.170405	0	0.0597258	0.0862895	0	0	0	0.009	0.382735	0.928192
TCGA.CF.A9FL.01	EPHA7-WT	0	0.0901224	0.230225	0.105444	0	0	0	0.100269	0	0	0	0.0503357	0	0.0248399	0.00637487	0.308222	0.00570188	0.0191459	0.0589141	0	0	0.0004	0.009	0.408087	0.916123
TCGA.4P.AA8J.01	EPHA7-WT	0.0781053	0	0.127948	0.063289	0	0.0865857	0	0.0378142	0.0188632	0	0.0601283	0	0	0.217062	0.0653849	0.172179	0.00672103	0	0	0.0659191	0	0	0.009	0.391212	0.921268
TCGA.C8.A278.01	EPHA7-WT	0.0160732	0.00418076	0.174504	0.0750165	0	0.0505346	0.0130819	0.0389567	0.0200403	0.00290517	0	0.0303137	0	0.0996455	0.0845414	0.29266	0.00906371	0.019222	0.0617035	0	0	0.00755659	0.009	0.364066	0.933955
TCGA.13.1405.01	EPHA7-WT	0.154533	0	0.121224	0.134134	0	0.159109	0	0.0227939	0.0391792	0	0	0.0783858	0.0140537	0	0.0375445	0.214842	0	0.00127574	0.0229248	0	0	0	0.009	0.358915	0.937743
TCGA.L5.A43E.01	EPHA7-WT	0.0006	0.126935	0.139969	0.343335	0	0.141839	0.00344653	0.00950558	0.0169019	0	0	0.0215052	0.039311	0.0581046	0.0240779	0.0107438	0	0	0	0.042755	0	0.0209427	0.009	0.369016	0.93888
TCGA.G4.6315.01	EPHA7-WT	0.215904	0	0.111755	0.137065	0	0.158653	0.0406757	0.082864	0.00103703	0	0.00560526	0.0619255	0.0366041	0.0221762	0.0141039	0.055068	0.0128672	0.0101022	0.0335942	0	0	0	0.009	0.362151	0.939591
TCGA.AC.A8OQ.01	EPHA7-WT	0.0350587	0.0211116	0.190717	0.0784162	0	0.0909366	0	0.147305	0.0178432	0	0	0.0238007	0	0.16909	0.10131	0.11236	0	0	0.0120502	0	0	0	0.009	0.407465	0.914997
TCGA.56.5897.01	EPHA7-WT	0.0987137	0	0.14019	0.0817561	0	0.128891	0	0.0440074	0.0280203	0	0	0.01893	0.0263105	0.13292	0.0419649	0.241179	0.00140033	0	0.015716	0	0	0	0.009	0.408687	0.912524
TCGA.NJ.A4YP.01	EPHA7-MUT	0.124323	0	0.157357	0.0987696	0	0.0854005	0.00912914	0.0556809	0	0	0.00954027	0.0131639	0	0.0526013	0.0278097	0.260374	0	0.0736606	0	0.0289803	0	0.00321028	0.009	0.405245	0.914546
TCGA.P3.A6T5.01	EPHA7-WT	0.0648688	0	0.147101	0.0426252	0	0	0	0.126889	0.0174658	0	0	0.0192321	0	0.285119	0.0115227	0.163493	0.0349915	0.0397923	0	0.0446421	0	0.00225741	0.009	0.371026	0.934025
TCGA.P3.A6T6.01	EPHA7-WT	0	0.030839	0.28517	0.0885813	0	0	0	0.187793	0	0	0.0428661	0	0.0387952	0.0293088	0.0746606	0.134679	0	0.0835709	0	0.00190034	0	0.00183523	0.009	0.39041	0.930862
TCGA.10.0936.01	EPHA7-WT	0.0569194	0.0167634	0.173284	0.0732834	0	0.0999086	0	0.12763	0.0472461	0	0	0.0766846	0.0152266	0	0.031039	0.161493	0	0.0858712	0	0.0284645	0	0.006186	0.009	0.371447	0.931237
TCGA.IN.A7NR.01	EPHA7-WT	0.0813683	0.0640799	0.1566	0.096876	0	0.0897879	0	0.144101	0.0463294	0	0	0.0679627	0.0114479	0	0.0383931	0.132878	0	0.0247968	0.018364	0.0270142	0	0	0.009	0.417886	0.909302
TCGA.K4.A3WS.01	EPHA7-WT	0.193367	0	0.067168	0.111891	0	0	0	0.0544746	0.0445834	0	0.00586632	0.0031626	0.0292705	0	0.201705	0.184704	0.0318086	0	0.0719993	0	0	0	0.009	0.354197	0.94342
TCGA.X8.AAAR.01	EPHA7-WT	0.228077	0	0.0706558	0.106802	0	0.165766	0	0.1088	0.0391261	0	0	0.0399214	0.0175065	0	0.0574406	0.128774	0	0.0175635	0.0195669	0	0	0	0.009	0.383715	0.926747
TCGA.KK.A7B0.01	EPHA7-MUT	0.112187	0	0.155325	0.158409	0	0.091798	0	0.132744	0.0252881	0	0	0	0	0.0934906	0.00601664	0.176893	0	0	0.0478487	0	0	0	0.009	0.40609	0.914883
TCGA.D9.A3Z3.06	EPHA7-WT	0.205995	0	0.0824116	0.0954148	0	0.097952	0	0.110004	0.035553	0	0	0.0342752	0.00636514	0.0285701	0.0698179	0.214463	0	0	0.0191781	0	0	0	0.009	0.408991	0.912629
TCGA.55.6972.01	EPHA7-WT	0.0424224	0	0.239516	0.178303	0	0.048157	0	0.0171687	0	0	0.0630077	0.0988201	0.055155	0	0.0342617	0.152844	0.00532812	0.00943793	0.0555779	0	0	0	0.009	0.354806	0.947382
TCGA.D6.A6EP.01	EPHA7-WT	0.0315545	0	0.252494	0.156437	0	0	0.00911487	0.0758618	0.0333998	0	0	0.0909096	0	0.00529665	0.00684945	0.296095	0	0.0009	0.0410961	0	0	0	0.009	0.392864	0.925902
TCGA.A7.A6VW.01	EPHA7-WT	0.161957	0	0.116199	0.0196496	0	0	0	0.0884708	0	0	0.0110265	0.00423832	0.0227655	0.0539328	0.0777107	0.266096	0	0.11469	0	0.0530227	0	0.0102411	0.009	0.371869	0.932078
TCGA.G5.6641.01	EPHA7-WT	0.0919073	0	0.220576	0.125476	0	0.116269	0	0.16564	0	0	0.0188753	0.0249306	0.00845614	0.0620972	0.0277648	0.10226	0	0.00650559	0	0.0292427	0	0	0.009	0.371205	0.938136
TCGA.ED.A66X.01	EPHA7-WT	0.133944	0	0.140876	0.0778349	0	0.0491248	0.00999734	0.00913203	0.0346648	0	0	0	0.00448155	0.0851201	0.00926084	0.445564	0	0	0	0	0	0	0.009	0.355341	0.944316
TCGA.H7.A6C4.01	EPHA7-WT	0.0547333	0	0.218798	0.103916	0	0.0449672	0	0.0278668	0	0	0	0.00693093	0	0.0681067	0.0827271	0.234862	0.0549814	0.044315	0	0.0519254	0	0.00587006	0.009	0.377778	0.931028
TCGA.85.6798.01	EPHA7-WT	0.110407	0	0.165282	0.0277725	0	0.133148	0	0	0	0	0.0517569	0	0	0.136007	0	0.252352	0.00408363	0.0302577	0	0.0889328	0	0	0.009	0.401316	0.917557
TCGA.44.A479.01	EPHA7-WT	0.0180954	0.010884	0.201665	0.133009	0	0.157821	0	0.0755159	0.0121143	0.00632974	0	0.00846373	0	0.0394724	0.11321	0.209476	0.00501848	0	0.00883244	0	0	0.0001	0.009	0.409358	0.914177
TCGA.NA.A4QW.01	EPHA7-WT	0.126155	0	0.198357	0.111801	0	0.0570286	0	0.129121	0.00899603	0	0	0.0537597	0.0137925	0	0.00540602	0.274036	0	0.0184675	0	0.00308028	0	0	0.009	0.385798	0.928183
TCGA.90.A59Q.01	EPHA7-MUT	0.0632702	0	0.1456	0.223665	0	0	0.0556861	0.0514119	0.0313609	0	0	0.0885936	0.00459328	0	0.0624351	0.0994637	0.00851183	0.00628645	0.0923214	0	0	0.0667996	0.009	0.381216	0.925708
TCGA.50.6592.01	EPHA7-WT	0.130649	0	0.106722	0.143566	0	0.0658334	0.0322274	0.0313459	0	0	0.0156091	0.0560003	0	0.13902	0.056965	0.202836	0	0	0.0075203	0	0	0.0117045	0.009	0.372835	0.929527
TCGA.34.8454.01	EPHA7-WT	0.0764484	0	0.123018	0.0991813	0	0.0966639	0.0457821	0.051251	0.00614797	0	0.00420726	0.0731743	0.0338481	0.0334938	0.0645898	0.138625	0.00979722	0.00371487	0.135733	0	0	0.00432416	0.009	0.375949	0.926238
TCGA.63.7021.01	EPHA7-WT	0.0209185	0	0.228691	0.0648746	0	0.238101	0.00354704	0	0	0	0.0168153	0.0151913	0	0.113482	0.0503102	0.23074	0	0	0.0173297	0	0	0	0.009	0.417914	0.90989
TCGA.55.8092.01	EPHA7-WT	0	0.0630466	0.175591	0.24901	0	0.0565447	0	0.0453348	0.0390954	0	0	0.0726154	0.0204239	0	0.117546	0.137966	0	0	0.022827	0	0	0	0.009	0.390126	0.925746
TCGA.22.5482.01	EPHA7-WT	0.17623	0	0.0965024	0.050501	0.0159198	0.0154849	0	0.0076067	0.00230357	0	0.0338647	0	0	0.235586	0.0119079	0.294795	0	0	0	0.0538558	0	0.00544318	0.009	0.369367	0.937381
TCGA.77.A5GB.01	EPHA7-WT	0.0929772	0	0.137168	0.0589772	0	0.0152434	0	0.0317726	0.0199745	0	0.0491997	0	0	0.165376	0.0594419	0.225225	0.0112952	0	0	0.13335	0	0	0.009	0.388827	0.923696
TCGA.64.5815.01	EPHA7-WT	0.0922958	0	0.115236	0.0415088	0	0.11758	0	0.0244099	0.0281786	0	0.0308857	0	0.014383	0.123195	0	0.298886	0.0320032	0.0426049	0.0235731	0.00321795	0	0.0120417	0.009	0.362378	0.933718
TCGA.55.8301.01	EPHA7-WT	0.025012	0.0308866	0.136047	0.0965266	0	0.0943035	0.0352358	0.0437269	0.0363591	0	0.0175493	0.0230445	0.00842142	0.0783496	0.176428	0.129311	0.0160363	0	0.0527628	0	0	0	0.009	0.352102	0.940945
TCGA.4N.A93T.01	EPHA7-WT	0.166936	0	0.186031	0.103622	0	0.118684	0	0.182944	0	0	0	0.0511884	0.00947619	0.0458796	0.0109221	0.109522	0	0.0123767	0.00241732	0	0	0	0.009	0.393233	0.927398
TCGA.55.6983.01	EPHA7-WT	0.0358497	0.191287	0.0185314	0.095571	0	0.216357	0	0.0555467	0.0016742	0	0	0.015775	0	0.0485267	0.00997697	0.297407	0.00180527	0.00167997	0.010012	0	0	0	0.009	0.377047	0.927454
TCGA.86.8076.01	EPHA7-WT	0.04012	0	0.196722	0.211674	0	0.0691484	0.00622425	0.0858479	0.0622093	0	0	0.0172227	0.00264229	0.0851516	0.0408409	0.159049	0.00494762	0.0027381	0.00417922	0.0109434	0	0.0003	0.009	0.417654	0.90958
TCGA.66.2786.01	EPHA7-WT	0.0950596	0	0.123901	0.159241	0	0.0620937	0	0.0504864	0.0104897	0	0	0.0478517	0.00697251	0.0216972	0.0373264	0.324926	0.0025836	0.0335338	0.0146709	0	0	0.00916649	0.009	0.379575	0.925896
TCGA.78.7152.01	EPHA7-WT	0.0338063	0.0731567	0.126556	0.127464	0	0.16267	0	0.0718439	0.034421	0	0	0.0290075	0	0.0271258	0.0318089	0.244309	0.0204678	0	0.0151753	0	0	0.00218822	0.009	0.391487	0.920525
TCGA.85.8584.01	EPHA7-WT	0.0976737	0	0.153752	0.174225	0	0.148858	0.0324755	0.0657498	0.0407287	0	0.00781103	0.0550162	0	0.0521842	0.0787731	0.0573288	0.00327317	0	0.0296404	0	0	0.00251033	0.009	0.410611	0.913606
TCGA.49.AARO.01	EPHA7-WT	0.118589	0	0.132528	0.0590909	0	0.0588553	0	0.0749686	0.0343167	0	0.0537247	0	0.0252813	0.113624	0.00402772	0.225206	0.0132261	0.0384875	0	0.0471895	0	0.0009	0.009	0.418466	0.907571
TCGA.44.2655.01	EPHA7-WT	0.13953	0	0.143802	0.0315944	0	0.126504	0	0.0768414	0	0	0	0.0109002	0.016049	0	0.0100839	0.304186	0.0982912	0.0108189	0.0313988	0	0	0	0.009	0.40143	0.916249
TCGA.22.1002.01	EPHA7-WT	0.182784	0	0.0668313	0.0974888	0	0.156282	0	0.0399625	0	0	0.0259916	0.0326093	0.0890248	0	0.0167707	0.157635	0	0.0508692	0.0605485	0	0	0.0232027	0.009	0.367315	0.930256
TCGA.G3.A7M9.01	EPHA7-MUT	0.174467	0	0.121225	0.129199	0	0	0	0.0908138	0.0218859	0	0	0	0.0119057	0.307062	0.0212321	0.100971	0	0	0.0212387	0	0	0	0.009	0.352805	0.945427
TCGA.EJ.A7NN.01	EPHA7-WT	0.10764	0.0254078	0.133612	0.0713459	0	0.128255	0	0.119867	0	0	0	0.0445498	0.00760251	0.008675	0.0171209	0.133593	0	0.00115379	0.201178	0	0	0	0.009	0.358935	0.936293
TCGA.75.7025.01	EPHA7-WT	0.0714658	0.0392979	0.0866033	0.0737139	0	0.136637	0	0.0762801	0.00462436	0	0	0.0315771	0.0830802	0	0	0.162649	0.108835	0.0686714	0.0565648	0	0	0	0.009	0.363526	0.931074
TCGA.DQ.5629.01	EPHA7-WT	0.11437	0	0.20315	0.0548344	0	0	0.043309	0.0680447	0	0	0.0619836	0	0.00937677	0.136381	0	0.162372	0	0.10699	0	0.0363399	0	0.00284825	0.009	0.395168	0.921695
TCGA.56.8309.01	EPHA7-WT	0.135904	0	0.114131	0.112434	0	0.194959	0.0348407	0	0.0336707	0	0.0234415	0	0	0.0865154	0.06542	0.180651	0.0045409	0	0.0001	0.0134154	0	0	0.009	0.419079	0.907354
TCGA.AN.A0AL.01	EPHA7-WT	0.173958	0	0.0738401	0.0168307	0	0.224221	0	0.0744815	0.0107682	0	0.0128121	0.00924863	0	0.134392	0.0574478	0.186892	0	0	0.0251081	0	0	0	0.009	0.366123	0.932162
TCGA.22.4595.01	EPHA7-WT	0.039274	0	0.162156	0.0599432	0	0.131833	0	0.0145422	0.00198445	0	0	0.0400354	0	0.0343616	0.0445768	0.414077	0	0	0.00998014	0	0	0.0472359	0.009	0.356218	0.938966
TCGA.91.7771.01	EPHA7-WT	0.158254	0	0.104265	0.111855	0	0.265529	0	0.0279934	0	0	0	0.0389257	0.00729686	0	0.0469254	0.215422	0	0.00589343	0.0176415	0	0	0	0.009	0.3954	0.919556
TCGA.55.6984.01	EPHA7-WT	0.0893602	0.092955	0.0663129	0.0620747	0	0.243173	0	0.0826821	0.0657335	0	0.0208372	0	0.0250164	0.00267443	0	0.142858	0	0.0395531	0	0.0508121	0	0.0159573	0.009	0.352905	0.938524
TCGA.XC.AA0X.01	EPHA7-WT	0.122225	0	0.11261	0.062736	0	0.028508	0.00629583	0.0348675	0.0272268	0	0.0522722	0	0.00926195	0.269386	0	0.213915	0	0.0455347	0	0.0151617	0	0	0.009	0.411866	0.912611
TCGA.G2.A2EK.01	EPHA7-WT	0.0251563	0.231178	0.0214779	0.0988125	0.0219568	0.101148	0	0.101852	0.0333778	0	0	0.0550041	0.0179747	0.0116813	0.0004	0.130536	0.0216259	0.0335624	0.09421	0	0	0	0.009	0.374624	0.927553
TCGA.EJ.8474.01	EPHA7-WT	0.244091	0	0.0686624	0.0982952	0	0.101592	0	0.0329775	0.0084952	0	0	0.0420045	0.0275427	0.0640146	0.00891155	0.184284	0	0	0.119129	0	0	0	0.009	0.364109	0.933629
TCGA.FS.A1ZH.06	EPHA7-WT	0.103493	0	0.144318	0.162573	0	0.0652404	0	0.0830162	0.00873749	0	0	0.03503	0.0104608	0.0493186	0.0547978	0.27838	0	0	0.00286424	0	0	0.00177032	0.009	0.417137	0.908669
TCGA.CF.A9FF.01	EPHA7-WT	0.350781	0	0.0571385	0.126157	0	0	0	0.190207	0.054407	0	0	0.0337783	0.00691971	0.00619914	0.0201871	0.0749811	0	0.0274502	0.0517942	0	0	0	0.009	0.412654	0.917713
TCGA.LL.A8F5.01	EPHA7-WT	0.0146195	0.0370099	0.167656	0.0545811	0	0	0	0.129171	0.037403	0.0130216	0	0.0370514	0	0.216211	0.0628753	0.218182	0	0	0.0122183	0	0	0	0.009	0.407291	0.914525
TCGA.CN.5358.01	EPHA7-WT	0.115149	0	0.0936886	0.112338	0	0.126899	0.00562777	0.0507581	0.0352089	0	0.0266763	0	0.00327282	0.111433	0.0531231	0.205609	0.011933	0	0.0243826	0.0195193	0	0.00438211	0.009	0.387983	0.921314
TCGA.MP.A5C7.01	EPHA7-WT	0.0232468	0.0150919	0.229923	0.0872259	0.0122415	0	0	0.101307	0	0	0	0.116784	0.00605437	0.0453995	0	0.282483	0.0160952	0.0636189	0	0	0	0.0005	0.009	0.363373	0.939652
TCGA.EE.A2A2.06	EPHA7-WT	0.111678	0.103042	0.0757645	0.136817	0	0.0841616	0	0.0954048	0.00900536	0	0	0.0157016	0.0174392	0.0199019	0.0366465	0.285881	0.00574593	0	0.00281056	0	0	0	0.009	0.386069	0.923626
TCGA.CV.6936.01	EPHA7-WT	0.0293226	0	0.194072	0.244698	0	0	0	0.134849	0.020153	0	0	0.0430998	0.0102771	0.0433562	0.095554	0.148285	0.00337019	0.0203764	0.0103647	0	0	0.00222199	0.009	0.354552	0.943149
TCGA.97.8172.01	EPHA7-MUT	0	0.257052	0.00202043	0.0769901	0	0.175212	0	0.0306877	0.00797634	0	0	0.0227636	0.0334015	0	0.0117211	0.300037	0	0	0.082138	0	0	0	0.009	0.418075	0.907918
TCGA.JY.A6FH.01	EPHA7-WT	0.146384	0	0.202678	0.0256847	0	0.117014	0	0.158755	0.0432644	0	0.0619593	0	0.0257965	0.0547635	0.0260739	0.11877	0	0.0180179	0	0	0	0.0008	0.009	0.393919	0.924907
TCGA.69.8255.01	EPHA7-WT	0.117169	0	0.131189	0.29347	0	0	0.0488964	0.113608	0.0201603	0	0	0.0596855	0.011516	0.00654206	0.0576163	0.124561	0	0	0.014104	0	0	0.00148246	0.009	0.386064	0.927053
TCGA.CV.A45Y.01	EPHA7-WT	0.0845325	0	0.123077	0.0755453	0	0.0951064	0.00674971	0.0840455	0.0559167	0	0.0298409	0	0	0.168963	0.110037	0.126042	0.0155954	0	0.00976914	0.0071247	0	0.00765515	0.009	0.38637	0.923075
TCGA.FF.8047.01	EPHA7-MUT	0.415579	0.00882972	0	0.123055	0	0	0.114081	0.0568055	0.00697148	0	0.0403018	0	0.0323063	0.0492443	0.038574	0.0960074	0	0.00530909	0.012936	0	0	0	0.009	0.395696	0.925913
TCGA.24.1849.01	EPHA7-WT	0.111287	0	0.134085	0.141276	0	0.0895024	0.0193906	0.019049	0.0205446	0	0	0.0588384	0.104213	0	0.0466392	0.243209	0	0	0.00615785	0	0	0.00580754	0.009	0.40493	0.914026
TCGA.XX.A899.01	EPHA7-WT	0.179811	0	0.0438322	0.110137	0	0.18864	0	0	0	0	0.0117541	0	0.032392	0.0709887	0.0446299	0.212715	0	0	0.1051	0	0	0	0.009	0.352897	0.936477
TCGA.66.2753.01	EPHA7-WT	0.0875688	0	0.145934	0.0436349	0	0.178169	0.0305252	0	0	0	0.0291345	0	0.028726	0	0.0422838	0.318408	0	0.0120701	0.03926	0	0	0.0442861	0.009	0.392979	0.919247
TCGA.55.7913.01	EPHA7-WT	0.0964451	0	0.138824	0.0709707	0	0.0826696	0	0.0806222	0.0294642	0	0.00552221	0.00690028	0.0154382	0.182582	0.0262988	0.234558	0.0105944	0	0	0.00916061	0	0.0099491	0.009	0.356285	0.938654
TCGA.3M.AB47.01	EPHA7-WT	0.133549	0	0.15477	0.0753477	0	0.37308	0.0030421	0	0.00367639	0	0	0	0	0.0388386	0.0110718	0.183567	0	0.00277092	0	0.0202879	0	0	0.009	0.404205	0.917392
TCGA.D7.6522.01	EPHA7-WT	0.114662	0.0595844	0.046355	0.142018	0	0.0408811	0.0232939	0.051918	0.0935751	0	0	0.00455848	0.0270053	0.0142144	0.041384	0.287977	0.0308742	0	0	0.0214118	0	0.0003	0.009	0.387986	0.921207
TCGA.85.A4QR.01	EPHA7-WT	0	0.123294	0.188568	0.0453757	0	0.0360336	0	0.25728	0	0	0.0623502	0	0.0430589	0.00910308	0	0.0905554	0	0.140856	0	0.00352552	0	0	0.009	0.387577	0.926291
TCGA.XF.AAMZ.01	EPHA7-WT	0.280448	0	0.0645905	0.0629257	0.0423912	0	0.0227349	0.16072	0.0326423	0	0	0.00732751	0.0137987	0.00642121	0.00261188	0.242359	0	0.0303243	0.0307054	0	0	0	0.009	0.397782	0.919593
TCGA.55.6985.01	EPHA7-WT	0.140498	0	0.104701	0.07721	0	0.186152	0.0348582	0.0341029	0	0	0.0175554	0.0119829	0.0294012	0.0562929	0.0997147	0.170544	0.0043036	0	0.0192163	0.0134672	0	0	0.009	0.391683	0.920039
TCGA.BH.A42U.01	EPHA7-WT	0.0590822	0.0222365	0.132605	0.123585	0	0	0	0.198631	0.0178851	0.0131342	0	0.0603371	0.0008	0.152285	0.0358944	0.13334	0	0	0	0.0501751	0	0	0.009	0.360263	0.936236
TCGA.VQ.A91X.01	EPHA7-MUT	0.0588371	0.0480959	0.210075	0.143257	0	0	0	0.183609	0.062115	0	0	0	0.0126074	0.0937731	0	0.0745525	0.0332138	0.0163266	0	0.0635378	0	0	0.009	0.395644	0.923275
TCGA.YL.A9WX.01	EPHA7-WT	0.141766	0	0.179192	0.230992	0	0.0559245	0	0.123153	0	0	0	0.0217244	0.0690512	0.0396832	0.016143	0.0840589	0.0002	0.00609537	0.00508149	0.0249409	0.00195131	0	0.009	0.419107	0.910746
TCGA.MT.A67D.01	EPHA7-WT	0.138097	0	0.162632	0.05427	0	0.013298	0.055978	0.0324352	0.0049283	0	0.0448064	0	0.00997349	0.180643	0.0377455	0.114138	0	0.00654928	0	0.144507	0	0	0.009	0.411106	0.913589
TCGA.A7.A0CG.01	EPHA7-WT	0.124603	0	0.126221	0.0968878	0	0.236094	0.00332475	0.0387112	0.00192611	0.0108202	0	0.0331121	0.0103739	0.0073108	0.0584734	0.144999	0.0122111	0	0.0949313	0	0	0	0.009	0.411063	0.911131
TCGA.A1.A0SG.01	EPHA7-WT	0.125348	0.128467	0.0139782	0.0609865	0	0.116781	0	0.0531701	0	0	0	0.0401146	0.00173593	0	0.0307005	0.28494	0.00641553	0.00312094	0.132993	0	0	0.00124897	0.009	0.399889	0.915927
TCGA.22.5474.01	EPHA7-WT	0.0731541	0	0.145319	0.161883	0	0.0173144	0	0.0543712	0.0521023	0	0	0.0405685	0.00860031	0.0176353	0.145857	0.224342	0.0128807	0	0.0381422	0	0	0.00783029	0.009	0.395666	0.919728
TCGA.69.A59K.01	EPHA7-WT	0.0115963	0.0239455	0.185592	0.125466	0	0.108068	0.00539967	0.034443	0.0235764	0	0	0.0277334	0.0210049	0	0.0834103	0.331585	0.00206017	0.00522565	0.00655144	0	0	0.00434299	0.009	0.381033	0.926947
TCGA.96.8170.01	EPHA7-WT	0.0184222	0.0323067	0.202703	0.0464077	0	0.131484	0	0.0404123	0	0	0.0407106	0	0.0365504	0.00661	0.00565862	0.382754	0	0.0217411	0	0.014453	0	0.0197861	0.009	0.394849	0.921056
TCGA.63.A5MY.01	EPHA7-WT	0	0.0226612	0.294735	0.0614438	0	0	0	0.0771133	0	0	0.0381673	0.0228675	0.00412305	0	0.0295921	0.239172	0	0.0478732	0.00534098	0.0140836	0	0.142826	0.009	0.384853	0.9345
TCGA.86.8278.01	EPHA7-WT	0.127285	0	0.131769	0.0532911	0	0.146089	0	0.027088	0.0107254	0	0.0326036	0.0325681	0.0225776	0.00210159	0.0203381	0.269091	0	0.0214868	0.0967919	0	0	0.00619385	0.009	0.3954	0.91807
TCGA.EE.A2MD.06	EPHA7-MUT	0.142717	0	0.159349	0.0913531	0	0.0881518	0	0.126167	0.0110086	0.0038887	0	0.0388452	0	0.0826928	0.0502946	0.194641	0.00651355	0	0.00436443	0	0	0	0.009	0.401628	0.917475
TCGA.C4.A0F6.01	EPHA7-WT	0	0.152438	0.101231	0.163661	0	0	0	0.0559297	0.00271289	0.0149447	0	0.0475539	0.0268588	0.148326	0.00822525	0.175098	0	0.00992759	0.0930935	0	0	0	0.009	0.373004	0.928479
TCGA.VQ.A8PF.01	EPHA7-WT	0.109353	0	0.119938	0.155183	0	0.115458	0.0814357	0.0265133	0.0257113	0	0.0153388	0.0117849	0.0283523	0	0.100536	0.155181	0.0186503	0.00513396	0.0314299	0	0	0	0.009	0.408734	0.912086
TCGA.J4.A67M.01	EPHA7-WT	0.0963846	0	0.210582	0.0969564	0	0.136953	0	0.0373221	0.0335404	0	0.00995462	0.0129035	0.0907415	0.00719266	0.00387297	0.174756	0	0.005249	0.083592	0	0	0	0.009	0.418488	0.908931
TCGA.FS.A4F8.06	EPHA7-WT	0.098577	0.185876	0	0.164305	0	0.198029	0	0.0621017	0.0719539	0	0	0	0.0195387	0.0504647	0.0396974	0.105217	0	0	0.00423944	0	0	0	0.009	0.393894	0.921766
TCGA.85.8355.01	EPHA7-WT	0.0998759	0.0887325	0.0546918	0.118112	0	0.146209	0.0127261	0.0345025	0.0147784	0	0.00416758	0.0087157	0.0133079	0.0451593	0.0548602	0.278177	0	0	0.025984	0	0	0	0.009	0.41601	0.908601
TCGA.W8.A86G.01	EPHA7-WT	0.120648	0	0.155185	0.0933198	0	0	0	0.120799	0	0	0.0018955	0.0300312	0.0303842	0	0.0102842	0.338674	0	0	0.098779	0	0	0	0.009	0.381537	0.926009
TCGA.FA.A86F.01	EPHA7-WT	0.106101	0.135427	0.0008	0.189624	0	0	0.00290114	0.221847	0.0316789	0	0	0.0539061	0.0091651	0.126671	0.0475295	0.067914	0	0	0.00647757	0	0	0	0.009	0.369645	0.933322
TCGA.G4.6307.01	EPHA7-WT	0.245648	0	0.0980134	0.0727636	0	0.0201346	0	0.15713	0.0248928	0	0	0.0456112	0.00247431	0.0924161	0.0230979	0.195786	0.0105281	0	0.0115035	0	0	0	0.009	0.382524	0.927696
TCGA.ZF.A9R1.01	EPHA7-WT	0.146601	0.14054	0.0500157	0.12827	0	0.0115828	0	0.201353	0.00694275	0	0	0.0234519	0.0207114	0	0.0146835	0.212681	0	0.0212239	0.0219433	0	0	0	0.009	0.396729	0.919705
TCGA.78.8648.01	EPHA7-WT	0.0413617	0	0.184449	0.128409	0	0.0553339	0	0.0496617	0.0107396	0	0	0.0411572	0.0225101	0.151595	0.0279975	0.266063	0	0	0.0207209	0	0	0	0.009	0.418549	0.908545
TCGA.AZ.4323.01	EPHA7-WT	0.235253	0.0743368	0	0.117039	0	0.177074	0	0.16833	0.0347585	0	0	0	0	0.0245691	0.0181526	0.138085	0	0.0006	0	0.0117977	0	0	0.009	0.413742	0.913567
TCGA.21.5784.01	EPHA7-WT	0.00319664	0.0397748	0.146881	0.154346	0	0.0789542	0	0.0626452	0	0	0	0.0392571	0.0107687	0	0.0446592	0.312436	0.0399603	0.0316484	0.0178815	0	0	0.0175901	0.009	0.357741	0.935431
TCGA.KK.A6DY.01	EPHA7-WT	0.206571	0	0.161977	0.107495	0	0.064065	0.0007	0.0429211	0.00754679	0	0	0	0.0179912	0.174648	0.0279948	0.0778543	0	0	0	0.110264	0	0	0.009	0.414457	0.913814
TCGA.43.2581.01	EPHA7-WT	0.115543	0	0.101588	0.0223345	0	0.192882	0.0103725	0	0.0212975	0	0.0475521	0	0.0290017	0.179614	0.0322828	0.182769	0.0262132	0	0.011034	0.0125371	0	0.0149776	0.009	0.360272	0.934279
TCGA.ZG.A9L2.01	EPHA7-WT	0.202422	0	0.106945	0.0906489	0	0.202913	0	0.117162	0.00219269	0.00529207	0	0.0994541	0.00880531	0	0.0192807	0.0989423	0	0	0.0459431	0	0	0	0.009	0.352466	0.945608
TCGA.L5.A8NU.01	EPHA7-WT	0	0.0791161	0.164176	0.0555355	0	0.186595	0.0001	0.088383	0.142065	0	0.0202717	0	0.0120843	0.00742872	0.0523045	0.121135	0	0.0300275	0.0391812	0	0	0.00157153	0.009	0.404205	0.915449
TCGA.GF.A6C9.06	EPHA7-MUT	0.038448	0.172703	0.0164415	0.0602386	0	0.0533596	0	0.0751213	0.0277329	0	0	0.010522	0	0.212604	0.0826137	0.227225	0	0	0.0229911	0	0	0	0.009	0.412951	0.910579
TCGA.93.A4JN.01	EPHA7-WT	0.0640192	0.106136	0.0636334	0.0386633	0	0.141884	0	0.0927722	0.00771589	0	0.0161325	0.0103714	0.0337983	0.0105333	0.0200197	0.336711	0	0.0078311	0.0497795	0	0	0	0.009	0.371186	0.928823
TCGA.BA.A6DL.01	EPHA7-WT	0.0542909	0	0.214263	0.0845238	0.00387045	0	0	0.147584	0.0344682	0	0.0479736	0.0110894	0	0.0763344	0.0231564	0.118974	0	0.0476016	0	0.115265	0	0.020606	0.009	0.365746	0.935946
TCGA.66.2771.01	EPHA7-WT	0.0248746	0.0179613	0.196749	0.118092	0	0.0533926	0.0080687	0.0681438	0.00626221	0	0	0.0179805	0.0105533	0.0100896	0.078775	0.211987	0.060352	0.0315816	0	0.0202379	0	0.0648981	0.009	0.411357	0.911413
TCGA.MP.A4TJ.01	EPHA7-WT	0.0885373	0	0.127922	0.137087	0	0.202265	0.0008	0.0932166	0.00201708	0	0	0.0272104	0.015068	0.0577168	0.109715	0.128826	0.0009	0	0	0.00705978	0	0.00164077	0.009	0.372003	0.931739
TCGA.60.2721.01	EPHA7-WT	0.0441783	0	0.177848	0.288672	0	0.0495032	0	0.0503681	0.0434543	0	0	0.0180408	0.0267083	0	0.0719745	0.200652	0.00801197	0.00195413	0.0158837	0	0	0.00273323	0.009	0.401884	0.917541
TCGA.43.3920.01	EPHA7-WT	0.0592286	0	0.162272	0.168972	0	0.094505	0.0718646	0.0134161	0	0.0220346	0	0.066105	0	0.0119522	0.0373758	0.23549	0.0154345	0.00615788	0.002266	0.0114665	0	0.021459	0.009	0.383001	0.925073
TCGA.22.1000.01	EPHA7-WT	0.118655	0	0.108679	0.0898353	0	0.149629	0	0.0159457	0.0288216	0	0.0317373	0	0.0160001	0.0338343	0.0475387	0.273906	0.0573886	0.00205632	0.0006	0.0253866	0	0	0.009	0.406377	0.913008
TCGA.55.8616.01	EPHA7-WT	0.128166	0.0631845	0.0973529	0.101695	0	0.158032	0	0.0229614	0.0348328	0	0	0.0134438	0.0166536	0	0.0273961	0.303049	0	0.00184185	0.0313912	0	0	0	0.009	0.418005	0.907992
TCGA.B5.A11R.01	EPHA7-WT	0.134421	0	0.172121	0.188847	0	0	0	0.174424	0.0099013	0	0	0.0908226	0.0111316	0	0.0330884	0.173201	0.00707328	0.00110357	0.00386473	0	0	0	0.009	0.419117	0.911018
TCGA.22.5491.01	EPHA7-WT	0.14502	0	0.135711	0.131542	0	0	0.024949	0.0622316	0.00972923	0	0	0.048467	0.0185308	0.026862	0.0726205	0.227202	0.0680961	0	0.0290391	0	0	0	0.009	0.393714	0.919537
TCGA.AX.A3G4.01	EPHA7-WT	0.10737	0	0.232003	0.0793119	0	0.157454	0	0.025483	0.0516385	0	0	0.0532804	0.0322549	0.027956	0.0279797	0.158954	0	0.00228816	0.0440271	0	0	0	0.009	0.400462	0.9208
TCGA.BR.6706.01	EPHA7-WT	0.0594696	0	0.162575	0.276978	0	0.0659489	0.00708744	0.0331192	0.0827295	0	0	0.0437641	0.0155658	0	0.115433	0.0899198	0.0108131	0	0.036596	0	0	0	0.009	0.397809	0.921564
TCGA.85.8276.01	EPHA7-WT	0.0692911	0	0.129218	0.143753	0	0.0861373	0.0190735	0.0447375	0.0471753	0	0.00479021	0.0270948	0	0.135141	0.087753	0.178113	0.00905232	0	0	0.0186705	0	0	0.009	0.376011	0.927803
TCGA.NC.A5HT.01	EPHA7-WT	0.0703993	0	0.209733	0.177357	0	0	0	0.114269	0.0329006	0	0	0.0628021	0	0.132342	0.0638762	0.119752	0	0	0	0.0121791	0.00438994	0	0.009	0.356976	0.94315
TCGA.97.A4M3.01	EPHA7-WT	0.135664	0	0.127643	0.0659942	0	0.14436	0	0.0705385	0.00874952	0	0	0.0437239	0.0459049	0	0.00796307	0.283075	0	0.0236861	0	0.0426258	0	0.0001	0.009	0.36207	0.934344
TCGA.49.4487.01	EPHA7-WT	0.0925516	0.0880271	0.0444209	0.168472	0	0.0887758	0.00496385	0.0671386	0.0521255	0	0	0.0314529	0	0.14016	0.0690572	0.151604	0	0	0.00124994	0	0	0	0.009	0.380036	0.9259
TCGA.IQ.7632.01	EPHA7-WT	0	0.0681371	0.23546	0.0803693	0	0.0312538	0.020118	0.0290025	0.0133676	0	0.0824849	0	0.00215427	0.202118	0.0577445	0	0.0421289	0.0624818	0	0.0427143	0	0.0304644	0.009	0.388733	0.927268
TCGA.95.A4VK.01	EPHA7-WT	0.10882	0.136129	0.0297777	0.103438	0	0.198977	0	0.117329	0.00499837	0	0	0.023648	0.007402	0.0477261	0.0598479	0.145457	0	0.00956135	0.00688832	0	0	0	0.009	0.375269	0.929256
TCGA.A5.A2K3.01	EPHA7-WT	0.00878653	0	0.194542	0.343795	0	0	0.0366254	0.0876972	0.0385644	0	0	0.0843835	0.0158262	0	0.0426807	0.139016	0.00108794	0	0.00699531	0	0	0	0.009	0.390689	0.928223
TCGA.MP.A4T6.01	EPHA7-WT	0.173231	0	0.0823218	0.0988936	0	0.0583649	0	0.0881686	0.0730007	0	0.0321036	0	0.0186966	0.201406	0.0468956	0.111053	0	0	0.00830146	0.00370996	0	0.00385287	0.009	0.374581	0.928931
TCGA.T2.A6WZ.01	EPHA7-WT	0.0421771	0.00860618	0.222741	0.152986	0	0	0.0370492	0.0610589	0.0220413	0	0.00290639	0.00101212	0.010797	0.133617	0.0322374	0.158962	0.0160208	0.00523112	0	0.0902037	0	0.00235358	0.009	0.406745	0.915587
TCGA.BH.A0W5.01	EPHA7-WT	0.10467	0.146236	0	0.0473946	0	0.296557	0	0.0731653	0.0353119	0	0	0.0196244	0	0.14337	0.0214088	0.0887804	0	0	0.0234823	0	0	0	0.009	0.380549	0.926802
TCGA.55.8091.01	EPHA7-WT	0.135395	0	0.111773	0.0349507	0	0.161368	0	0	0.0207255	0	0.0363185	0.0166145	0.0302716	0	0.0677492	0.322723	0.00272078	0.0017817	0.0510487	0	0	0.00655926	0.009	0.3865	0.922272
TCGA.EJ.A7NM.01	EPHA7-WT	0.15075	0	0.129489	0.118443	0	0.136726	0	0.102665	0.0754632	0	0	0.0446258	0.0180418	0.0244952	0.0611027	0.0977726	0	0	0.0404258	0	0	0	0.009	0.374584	0.930966
TCGA.C8.A12L.01	EPHA7-WT	0.130681	0	0.150875	0.0502979	0	0.10619	0.00309466	0.0758182	0	0	0	0.0380462	0.00487015	0.0582317	0.0543589	0.280145	0.0161962	0	0.0195345	0	0	0.0116598	0.009	0.38319	0.925264
TCGA.86.7713.01	EPHA7-WT	0.0424464	0	0.180733	0.0642754	0	0.185506	0	0.0358013	0.0139733	0	0.00568646	0	0.0486598	0.0240971	0.0363176	0.293002	0	0.0311348	0.0323226	0	0	0.00604369	0.009	0.352211	0.939074
TCGA.LD.A66U.01	EPHA7-WT	0.10803	0	0.146785	0.20618	0	0	0	0.187078	0.0684551	0	0	0.0634213	0.012071	0	0.0487945	0.127645	0.00346423	0	0.0280756	0	0	0	0.009	0.390288	0.924765
TCGA.85.8580.01	EPHA7-WT	0.101655	0.139337	0	0.0442346	0	0.0910019	0	0.126935	0.00952644	0	0	0.00215797	0.0006	0.195431	0.0326683	0.231028	0	0.0122861	0.0131222	0	0	0	0.009	0.357359	0.937372
TCGA.HU.A4GH.01	EPHA7-WT	0.157312	0	0.153655	0.0928912	0	0.0211794	0	0.179951	0.0329655	0	0	0.0600292	0.0004	0.0965296	0.00758388	0.120829	0	0.00268094	0	0.0293334	0	0.0446372	0.009	0.390079	0.923868
TCGA.S3.A6ZG.01	EPHA7-WT	0.130113	0	0.123217	0.0698225	0	0.0825734	0	0.0512493	0.0130113	0	0	0.0174114	0	0.0580416	0.0393765	0.310427	0.00274438	0	0.0948407	0	0	0.00717178	0.009	0.375488	0.927599
TCGA.PL.A8LV.01	EPHA7-WT	0.0951849	0.0543826	0.0907429	0.0617089	0	0.122689	0	0.183033	0.021195	0.0121418	0	0.00500422	0	0.137229	0.109139	0.0923731	0	0	0.0151766	0	0	0	0.009	0.369055	0.932372
TCGA.56.6546.01	EPHA7-WT	0.0791518	0	0.11135	0.157214	0	0.136248	0.0373318	0.0519419	0.00462973	0	0	0.0432477	0	0.0912062	0.0908252	0.168636	0.0114295	0	0	0.0167879	0	0	0.009	0.356256	0.936859
TCGA.A7.A4SB.01	EPHA7-WT	0.177795	0	0.178512	0.152861	0	0.025657	0	0.115941	0	0	0.090376	0	0.0357471	0	0	0.153149	0	0	0.0699626	0	0	0	0.009	0.417444	0.911787
TCGA.AH.6544.01	EPHA7-WT	0.176647	0.202957	0.0261689	0.0229151	0	0.0914461	0	0.167724	0	0	0	0.0153518	0	0.139138	0.00327269	0.10605	0	0.0257154	0	0.0226139	0	0	0.009	0.415288	0.912436
TCGA.CN.5360.01	EPHA7-WT	0.161824	0	0.0652492	0.150985	0	0.0634707	0.0386751	0.0177626	0.0471535	0	0.0245583	0.011905	0.0015279	0.0873416	0.101806	0.183819	0.010396	0	0.0335257	0	0	0	0.009	0.383426	0.923664
TCGA.DA.A1IB.06	EPHA7-WT	0.115306	0.0857767	0.0277245	0.171519	0	0.0325836	0.0100164	0.100469	0.0441622	0	0	0.0366543	0	0.113245	0.0584273	0.163726	0.0010914	0	0.0392992	0	0	0	0.009	0.383052	0.923767
TCGA.D5.6929.01	EPHA7-WT	0	0.0276157	0.214716	0.100941	0	0.0816541	0	0.0470446	0.00885402	0	0.00697869	0	0	0.248818	0.0350755	0.190531	0	0	0	0.0377727	0	0	0.009	0.380022	0.932017
TCGA.E2.A1B6.01	EPHA7-WT	0.116255	0.0996344	0.00196293	0.120835	0	0.154063	0.00665946	0.108036	0.106283	0.0216792	0	0.0127784	0	0.0686471	0.0913421	0.0754706	0	0	0.0163534	0	0	0	0.009	0.362168	0.936495
TCGA.CR.7367.01	EPHA7-WT	0.0645848	0	0.175212	0.0917908	0	0.161684	0.00535161	0	0	0	0.0258003	0	0	0.155372	0.0777179	0.206459	0	0	0.00829611	0.0242964	0	0.00343395	0.009	0.378058	0.928674
TCGA.OL.A66O.01	EPHA7-WT	0	0.0419569	0.217965	0.180787	0	0.0130323	0	0.0761091	0.0621141	0	0	0	0.0157932	0.0129474	0.0191716	0.223962	0	0	0.136162	0	0	0	0.009	0.417841	0.908973
TCGA.B6.A0I1.01	EPHA7-WT	0.0943344	0	0.219843	0.0209256	0.0360613	0	0	0.0331757	0	0	0.018804	0	0	0.362227	0.0341693	0.14503	0	0.0295248	0.00590551	0	0	0	0.009	0.359919	0.954655
TCGA.OL.A5RU.01	EPHA7-WT	0.162592	0.0142772	0.0644172	0.180753	0	0.136905	0	0.0991195	0.0387117	0	0	0.00872561	0.00300446	0.0440186	0.0232832	0.194992	0.0021323	0	0.0270679	0	0	0	0.009	0.367102	0.93292
TCGA.39.5036.01	EPHA7-WT	0.107546	0	0.148489	0.116596	0	0.0208176	0	0.0522758	0.0411594	0	0	0.0476932	0	0.149773	0.0265076	0.269642	0.0195007	0	0	0	0	0	0.009	0.39341	0.921159
TCGA.34.8455.01	EPHA7-WT	0.0692178	0	0.198777	0.0787598	0	0.0641475	0	0.0564605	0	0	0	0.0300724	0	0.061906	0.114847	0.198197	0	0.00289712	0.0939964	0	0	0.0307214	0.009	0.416546	0.909507
TCGA.B6.A0WT.01	EPHA7-WT	0.0850775	0	0.170671	0.0539665	0	0.0748225	0	0.0312447	0.0371122	0	0	0.0217169	0	0.0554383	0.0447911	0.26251	0.0006	0.0204986	0.138393	0	0	0.00314622	0.009	0.38128	0.925279
TCGA.46.3766.01	EPHA7-WT	0.0135685	0.0135275	0.18351	0.0800059	0	0.211397	0	0.00178857	0.00904851	0	0	0.0149705	0.0214336	0	0.043682	0.232433	0.0630653	0.0112165	0.0973669	0	0	0.00298681	0.009	0.40245	0.914994
TCGA.60.2711.01	EPHA7-WT	0.0583424	0	0.171404	0.178836	0	0.0354718	0	0.102586	0.0176458	0	0	0.0594643	0	0	0.0725175	0.201335	0.0275682	0.0122313	0.0625973	0	0	0	0.009	0.3932	0.920188
TCGA.CV.6939.01	EPHA7-WT	0.143884	0	0.0854417	0.112409	0	0.151681	0	0.11152	0.017906	0	0	0.0351352	0.0256637	0.053637	0.0838356	0.151078	0.00500421	0.00142754	0.0213766	0	0	0	0.009	0.359247	0.935513
TCGA.XF.A9SP.01	EPHA7-WT	0.116595	0	0.163949	0.101976	0.0226943	0	0	0.0641004	0.00981556	0	0	0.0102683	0.0424242	0	0.0304817	0.363103	0	0.0166237	0.0579693	0	0	0	0.009	0.38808	0.923399
TCGA.HC.7079.01	EPHA7-WT	0.0906847	0.0753368	0.061349	0.0506766	0	0.172925	0	0.144622	0.015224	0	0	0.00331226	0.00293027	0.0945601	0.0577355	0.2279	0	0	0.00274325	0	0	0	0.009	0.374055	0.928541
TCGA.L9.A7SV.01	EPHA7-WT	0	0.0726104	0.18419	0.185642	0	0.00839699	0	0	0.01774	0.0184396	0	0.0903344	0.0168386	0	0.0577578	0.20019	0.0354048	0	0.112456	0	0	0	0.009	0.374188	0.930076
TCGA.AR.A5QQ.01	EPHA7-WT	0.0572033	0	0.161146	0.126233	0	0.069784	0.0441028	0.0407285	0.00815989	0	0.00434737	0	0.0001	0.0732472	0.100932	0.266721	0.0124726	0	0	0.0318586	0	0.00292296	0.009	0.40105	0.916387
TCGA.D3.A3CF.06	EPHA7-WT	0.170547	0.0540007	0.0592462	0.0814405	0	0.140761	0	0.108395	0.032398	0	0	0.0288152	0.0104421	0	0.0342903	0.273363	0	0	0.00630108	0	0	0	0.009	0.392664	0.92053
TCGA.AA.A01X.01	EPHA7-WT	0.311032	0	0.0406618	0.0396163	0	0.215661	0	0.143674	0	0	0	0.011607	0.0135298	0.0009	0.0179881	0.146356	0.0462847	0	0	0.0127245	0	0	0.009	0.360883	0.94114
TCGA.44.6145.01	EPHA7-WT	0.0668993	0	0.152116	0.220354	0	0.0706552	0.0180506	0.0626489	0.00806819	0	0	0.0633879	0.00706505	0.0019161	0.0936488	0.17247	0.00231182	0.0148721	0.0200739	0	0	0.0254621	0.009	0.378198	0.928614
TCGA.L5.A4OP.01	EPHA7-WT	0.139564	0	0.159254	0.17586	0	0.198877	0	0.127176	0.00866787	0	0	0.0361	0.0228761	0.0686061	0.00242063	0.0205652	0	0.0129188	0	0.0271146	0	0	0.009	0.370579	0.939509
TCGA.55.8085.01	EPHA7-WT	0.0848968	0	0.140579	0.133058	0	0.0802612	0.00677348	0.0818058	0.0372986	0	0.0083737	0.0188861	0.0588289	0.0598398	0.0606218	0.177325	0.00921219	0.00567714	0	0.0365634	0	0	0.009	0.392474	0.91958
TCGA.AJ.A8CT.01	EPHA7-WT	0.080835	0	0.172397	0.205186	0	0.0893116	0	0.16687	0.0480482	0	0	0.0353491	0.0097972	0.0362014	0.0545565	0.0863825	0.0001	0	0.0149627	0	0	0	0.009	0.400763	0.92068
TCGA.05.4403.01	EPHA7-WT	0.133715	0	0.105158	0.031323	0	0.10846	0	0.0207866	0.00866501	0	0	0.0118617	0.0374089	0.0706464	0.0331461	0.398962	0.0105624	0	0.0248013	0	0	0.00450322	0.009	0.358534	0.937598
TCGA.55.8097.01	EPHA7-WT	0.188787	0	0.0714575	0.0762496	0	0.106656	0	0.0662859	0.0299241	0	0	0.0274475	0.031214	0	0.00917718	0.259998	0.00804176	0.0115763	0.10969	0	0	0.00349363	0.009	0.413938	0.909568
TCGA.WE.AA9Y.06	EPHA7-WT	0.0744301	0.124961	0.0499587	0.103688	0	0.0681712	0	0.0926009	0.0768114	0	0.00498646	0.0047382	0.0445466	0.0344566	0.0006	0.289912	0.00125045	0	0.0285279	0	0	0.0004	0.009	0.36303	0.93311
TCGA.F7.7848.01	EPHA7-WT	0.00595706	0.068407	0.15044	0.116591	0	0.143139	0.0334463	0.0157578	0.0164332	0	0.0272244	0	0.00691179	0.0712387	0.0125464	0.295808	0	0.00144206	0	0.0244633	0	0.0101938	0.009	0.368223	0.931647
TCGA.DK.A1A3.01	EPHA7-MUT	0.154274	0	0.139284	0.0817717	0	0.0532176	0.0114946	0.0487946	0.00699831	0	0	0.0370191	0.00982795	0.0182575	0.0690716	0.241903	0	0.0206461	0.10744	0	0	0	0.009	0.403016	0.915091
TCGA.44.6777.01	EPHA7-WT	0.0519901	0	0.139283	0.0378618	0	0.0746815	0.0011934	0.00794767	0.0151361	0	0	0.0149923	0.0568755	0.0172829	0.0223958	0.426932	0.067146	0	0.0580677	0	0	0.00821454	0.009	0.363916	0.934592
TCGA.AR.A2LH.01	EPHA7-WT	0.172601	0	0.0729462	0.124382	0	0.200943	0.0331487	0.00695208	0.0490049	0	0	0.0008	0.0551482	0	0.0608307	0.125935	0.0206774	0	0.0766025	0	0	0	0.009	0.396647	0.917467
TCGA.CR.5249.01	EPHA7-WT	0.169977	0.0573164	0.0226239	0.111117	0	0.17944	0	0.111963	0.0365363	0	0	0.0281126	0.00752244	0.0325477	0.0477164	0.105184	0	0.0284181	0.0615258	0	0	0	0.009	0.37295	0.929546
TCGA.44.7659.01	EPHA7-WT	0.0519076	0.0730118	0.111755	0.0554645	0	0.109168	0	0.0972589	0.0003	0	0	0.0333133	0.0125121	0.0267401	0.0157477	0.32786	0.0230094	0.0211862	0.040799	0	0	0	0.009	0.377788	0.926192
TCGA.93.A4JQ.01	EPHA7-WT	0.131776	0.117043	0	0.0318486	0	0.190268	0	0.10816	0.00604661	0	0.00392014	0	0	0.107277	0.126522	0.167204	0	0	0.00993627	0	0	0	0.009	0.370963	0.93125
TCGA.HQ.A2OE.01	EPHA7-MUT	0.0450005	0	0.220805	0.146039	0.0248219	0	0.00944947	0.0770422	0.0297273	0	0	0	0.0403096	0	0.0267088	0.181312	0.0826746	0.0626654	0	0.0417237	0	0.011721	0.009	0.36465	0.934919
TCGA.C8.A26Z.01	EPHA7-WT	0.159406	0	0.121856	0.0614218	0	0.0225188	0	0.054761	0.0132949	0	0	0.0756314	0	0.012871	0.0495505	0.29608	0.0207108	0	0.0735059	0.0314368	0	0.00695592	0.009	0.387785	0.922534
TCGA.PG.A5BC.01	EPHA7-WT	0.185119	0	0.145898	0.0705498	0	0.132069	0	0.124187	0	0.0134974	0	0.0477294	0.00614394	0	0.002914	0.165708	0	0.0853841	0.0207996	0	0	0	0.009	0.391685	0.923046
TCGA.13.0714.01	EPHA7-WT	0.0425157	0.0788086	0.119089	0.15086	0	0.0778083	0	0.0953599	0.0268358	0	0	0.0499178	0.0479583	0.0216246	0.0426263	0.230275	0	0	0.0163209	0	0	0	0.009	0.371571	0.929554
TCGA.63.A5MU.01	EPHA7-WT	0.0110783	0.0122901	0.189457	0.0918382	0	0	0.0043618	0.125873	0	0	0	0.0270264	0.00588159	0	0.0312608	0.148897	0.0216122	0.105554	0.212625	0	0	0.0122453	0.009	0.354934	0.937395
TCGA.AR.A1AW.01	EPHA7-WT	0.106367	0.0607636	0.0430907	0.160736	0	0.140254	0.0082507	0.0552651	0.0202501	0	0	0.0173537	0	0.135133	0.0785291	0.166142	0	0	0.00786554	0	0	0	0.009	0.364374	0.93307
TCGA.YC.A8S6.01	EPHA7-WT	0.00784249	0	0	0.0602334	0	0.0377623	0.0128172	0.0557313	0.0420159	0	0	0	0.105419	0	0	0.180591	0	0.12068	0	0.368974	0	0.00793306	0.009	0.382864	0.935997
TCGA.GS.A9TW.01	EPHA7-WT	0.00109871	0.197819	0	0.170109	0	0	0.073716	0.0713453	0.00197346	0.00531992	0	0.012235	0	0.183193	0.128672	0.0485653	0	0.0889096	0.0170438	0	0	0	0.009	0.413388	0.910561
TCGA.BA.A6DA.01	EPHA7-WT	0.0990044	0	0.168041	0.127859	0	0	0.0642779	0.04587	0	0	0.041448	0	0.00571499	0.181664	0.0569761	0.0986358	0.0176698	0	0	0.0633279	0	0.0295118	0.009	0.384616	0.924974
TCGA.C8.A132.01	EPHA7-WT	0.113454	0	0.138076	0.145969	0	0.146335	0	0.0902619	0.0434993	0	0	0.00806855	0	0.10542	0.0538532	0.126835	0.0183581	0	0.00987002	0	0	0	0.009	0.419507	0.907698
TCGA.D8.A27W.01	EPHA7-WT	0.0637133	0	0.187346	0.104973	0	0.0871352	0	0.0112909	0.0280639	0	0	0.0519853	0	0.0451791	0.0445365	0.294726	0.00806759	0	0.0625796	0	0	0.0104048	0.009	0.419458	0.907471
TCGA.ED.A82E.01	EPHA7-WT	0.19202	0	0.12684	0.0691196	0	0.109086	0.00312527	0.00760763	0.0381001	0	0.0229647	0	0.0207175	0	0	0.373232	0	0.00768039	0	0.0243806	0	0.00512643	0.009	0.388335	0.924545
TCGA.86.8359.01	EPHA7-WT	0.17377	0	0.143802	0.216381	0	0.0879982	0.0164513	0.106362	0.0400541	0	0	0.0525107	0.0235091	0.0426955	0.0114265	0.0398879	0	0.00153829	0	0.0239989	0	0.0196148	0.009	0.416005	0.913436
TCGA.A7.A26G.01	EPHA7-WT	0.13756	0	0.117995	0.060879	0	0.16592	0	0.0353885	0.0106788	0	0	0.00555912	0.0007	0.0428301	0.0949708	0.189016	0.0908849	0	0.047618	0	0	0	0.009	0.398559	0.916727
TCGA.XF.A8HI.01	EPHA7-WT	0	0.0666161	0.199266	0.0584763	0	0.0875778	0	0.100102	0.0717737	0	0.03327	0	0.0172563	0	0	0.181245	0.0302555	0.0493936	0	0.0990921	0	0.00567445	0.009	0.369995	0.931758
TCGA.95.7948.01	EPHA7-WT	0.09561	0	0.167484	0.128096	0	0.0750214	0	0	0.00886222	0	0	0.0856187	0.040545	0	0	0.224983	0.0163096	0.0100624	0.142771	0	0	0.00463651	0.009	0.371499	0.93032
TCGA.22.5481.01	EPHA7-MUT	0.00633665	0	0.220385	0.211336	0	0.134629	0	0.0723324	0.00752708	0	0	0.067112	0.012212	0.0586039	0.113748	0.0861779	0	0	0.00960011	0	0	0	0.009	0.376665	0.935487
TCGA.78.7167.01	EPHA7-WT	0.120069	0	0.13855	0.0975332	0	0.101026	0	0.0945668	0	0	0	0.0414766	0.0702556	0	0.03868	0.240919	0	0	0.0569226	0	0	0	0.009	0.354677	0.937157
TCGA.G2.A3IE.01	EPHA7-WT	0	0.112293	0.157839	0.0887347	0	0.00109105	0	0.127381	0.118021	0	0.0445386	0	0.0102318	0	0	0.261556	0	0.0600404	0	0.0182738	0	0	0.009	0.37728	0.928011
TCGA.05.4417.01	EPHA7-WT	0.0648052	0	0.151277	0.0552683	0	0.165484	0.0490048	0.0384255	0.00739295	0	0	0.0111617	0.0383507	0.0452529	0.015796	0.284239	0.0245447	0.0249989	0.0221895	0	0	0.00180889	0.009	0.398768	0.916759
TCGA.EO.A3AS.01	EPHA7-WT	0.135805	0	0.136239	0.10709	0	0.0623324	0	0.035267	0.0456017	0	0	0.0604154	0	0.0481075	0.0553951	0.234957	0	0.0622288	0.0163003	0	0	0.0003	0.009	0.362583	0.934868
TCGA.49.4505.01	EPHA7-MUT	0.0647625	0	0.162629	0.0924783	0	0.0925167	0.0004	0.0334313	0.0183659	0	0	0.0357692	0.0273256	0	0.08426	0.21723	0.0744805	0.0242204	0.069529	0	0	0.00256828	0.009	0.391727	0.91974
TCGA.EE.A2MR.06	EPHA7-WT	0.0757547	0.150105	0.00715871	0.185303	0	0.117108	0	0.0707035	0.0323377	0	0.00107089	0	0.00506669	0.0486605	0.0553233	0.251407	0	0	0	0	0	0	0.009	0.400871	0.916159
TCGA.22.5489.01	EPHA7-WT	0.0785564	0	0.139865	0.112291	0	0.137972	0.0166556	0.046734	0.0435193	0	0	0.0179175	0.0316296	0.0769507	0.0817171	0.191033	0.0116047	0.00134898	0	0.0122054	0	0	0.009	0.382243	0.924608
TCGA.77.8153.01	EPHA7-WT	0.00241984	0.0366316	0.227707	0.162872	0	0.127743	0	0.019606	0.0226904	0	0	0	0	0.144648	0.0206357	0.116682	0	0	0	0.118365	0	0	0.009	0.38004	0.931095
TCGA.BR.8592.01	EPHA7-WT	0.0629479	0.198012	0.0191945	0.088608	0	0.26028	0.0287082	0.0293909	0.00773451	0	0	0.036065	0.0151922	0	0.00847945	0.179693	0	0.00292279	0.0609469	0	0	0.0018243	0.009	0.40022	0.916456
TCGA.55.8208.01	EPHA7-WT	0.0777557	0	0.134889	0.0677059	0	0.0815911	0	0.0790025	0.0183116	0	0	0.0336468	0.00593098	0.0876719	0.125156	0.260947	0.00481925	0	0.0136459	0	0	0.00892628	0.009	0.384298	0.924664
TCGA.55.6971.01	EPHA7-WT	0.0220638	0.0234777	0.165655	0.113021	0	0.168029	0	0.0664039	0	0	0	0.0366798	0.0246622	0.0792844	0.0866737	0.18958	0	0	0.0187509	0	0	0.00571824	0.009	0.388969	0.922038
TCGA.38.4625.01	EPHA7-WT	0.0499495	0	0.170724	0.0861202	0	0.131958	0	0.0208883	0	0	0	0.0409529	0.0325262	0.0957833	0.0582089	0.210028	0	0.0609803	0.0035683	0.0325039	0	0.00580816	0.009	0.359406	0.935876
TCGA.EJ.7794.01	EPHA7-WT	0.0793445	0	0.221546	0.0796553	0	0.125985	0	0.0519546	0	0	0	0.045979	0.064881	0.0462269	0.0185889	0.16083	0	0	0.10501	0	0	0	0.009	0.40001	0.918263
TCGA.2F.A9KR.01	EPHA7-WT	0	0.114473	0.141845	0.115241	0	0	0	0.198607	0	0	0	0.0789048	0.0705443	0	0.00118028	0.165301	0	0.0802404	0.0289278	0	0.00473497	0	0.009	0.360721	0.934891
TCGA.HC.A8D0.01	EPHA7-WT	0.122987	0	0.191454	0.105388	0	0.135954	0	0.0877252	0.00148742	0	0	0.048128	0.00269512	0.00317062	0.0106679	0.150493	0.0330141	0	0.106835	0	0	0	0.009	0.404606	0.91632
TCGA.22.0940.01	EPHA7-WT	0.133399	0	0.098689	0.0902149	0	0.151852	0.0412091	0.0714453	0.00702361	0	0	0.0971951	0.0149677	0.00726479	0.0669762	0.119971	0.0297961	0.00447773	0.0573975	0	0	0.00812084	0.009	0.38323	0.923985
TCGA.FS.A1Z7.06	EPHA7-WT	0.00557573	0	0.00771768	0.00895905	0	0.0470463	0	0.00271467	0.00544631	0	0.0195778	0	0	0.593442	0.0159499	0.256152	0	0	0.0374189	0	0	0	0.009	0.389698	0.965135
TCGA.21.1080.01	EPHA7-WT	0.116704	0	0.115173	0.245027	0	0	0.062434	0.0796955	0.0190154	0	0	0.034242	0.0400147	0.0434979	0.0326069	0.165104	0	0.0235853	0	0.0228994	0	0	0.009	0.375219	0.92809
TCGA.GR.7351.01	EPHA7-WT	0	0.259896	0	0.147717	0	0	0.0470219	0.0705277	0.0232486	0	0.00555823	0.00726317	0	0.333525	0.0272815	0.0727557	0	0	0.00520508	0	0	0	0.009	0.389369	0.924267
TCGA.64.1677.01	EPHA7-WT	0.033859	0.0605401	0.171628	0.10779	0	0.113061	0.0180037	0.118597	0.0133873	0.0141712	0	0.0325134	0	0.0478816	0.152765	0.113634	0	0	0	0.00216894	0	0	0.009	0.400554	0.920462
TCGA.A6.6651.01	EPHA7-WT	0.121842	0	0.110969	0.0445622	0	0.0559151	0	0.0431093	0.0184231	0	0	0	0.00488324	0.290907	0.0250161	0.248333	0	0	0.0360392	0	0	0	0.009	0.352568	0.945142
TCGA.97.A4LX.01	EPHA7-WT	0.120493	0	0.11641	0.0960129	0	0.188663	0.00473733	0.0577577	0.0294899	0	0.0171717	0	0.0265824	0	0.0791302	0.192558	0.0325238	0	0.0357946	0	0	0.00267516	0.009	0.409178	0.911809
TCGA.85.7844.01	EPHA7-WT	0.0644942	0	0.167486	0.0442603	0	0.148129	0	0.0003	0	0	0.024437	0.00184984	0	0.224384	0.0378152	0.224624	0	0	0.0472267	0.0135241	0	0.00151237	0.009	0.393466	0.921664
TCGA.55.A493.01	EPHA7-WT	0.116502	0	0.102656	0.0986196	0	0.149209	0.106893	0.0413801	0	0	0.0281768	0.0197492	0.0261373	0.0443203	0.0711568	0.175244	0.0101206	0	0	0.00818638	0	0.0016489	0.009	0.373614	0.927791
TCGA.44.2659.01	EPHA7-WT	0.095889	0	0.136798	0.133881	0	0.171589	0	0.047297	0.0722067	0	0	0.0514849	0.00788828	0.00740544	0.052908	0.154002	0.0060409	0	0.0587226	0	0	0.00388781	0.009	0.372267	0.93005
TCGA.55.1592.01	EPHA7-WT	0.12696	0	0.115395	0.0488169	0	0.0768351	0	0.0378054	0.0134674	0	0.0391553	0	0.0930113	0.0961918	0.0158411	0.294505	0.0208888	0	0	0.0160692	0	0.00505767	0.009	0.385636	0.923451
TCGA.BH.A8G0.01	EPHA7-WT	0.187567	0.0483446	0.028852	0.0253768	0	0.0532607	0	0.0497775	0.00771219	0	0	0.0231427	0	0.267405	0.0100964	0.235714	0	0	0.0627519	0	0	0	0.009	0.412974	0.912258
TCGA.FF.8062.01	EPHA7-WT	0.0415167	0.181775	0	0.252229	0	0	0.0152052	0.131449	0.0518546	0	0	0.0190312	0.00376532	0.17455	0.0306338	0.0870979	0	0	0.0108928	0	0	0	0.009	0.353783	0.939796
TCGA.66.2737.01	EPHA7-WT	0.11322	0	0.129904	0.101207	0	0.234204	0	0	0.025602	0	0.0202057	0.00674079	0.0242299	0.00229917	0.0532482	0.205489	0.0468873	0	0.0204046	0.0163591	0	0	0.009	0.400487	0.915971
TCGA.NA.A4R0.01	EPHA7-WT	0.137078	0	0.105693	0.136111	0	0.155025	0	0.118729	0.0199583	0	0	0.021593	0.0240212	0.0124182	0.122947	0.122425	0	0.00897924	0.0150223	0	0	0	0.009	0.362416	0.937306
TCGA.BR.8369.01	EPHA7-WT	0.196172	0.128774	0	0.0472967	0	0.215297	0	0.05901	0.0295984	0	0.0356021	0	0.0275833	0.040062	0.0223044	0.150087	0	0.00123035	0	0.0469822	0	0	0.009	0.37918	0.927797
TCGA.66.2766.01	EPHA7-WT	0.171155	0	0.138687	0.081394	0	0.0608083	0.016742	0.00528064	0.0114365	0	0.0204568	0.0126199	0.00667338	0	0.0597202	0.39574	0	0	0	0.0150527	0	0.00423273	0.009	0.412451	0.9125
TCGA.L5.A893.01	EPHA7-WT	0.349944	0	0	0.0747707	0	0.204459	0.0230526	0.0803322	0.010982	0	0.0386209	0	0.0290054	0.0191074	0.033208	0.125059	0	0	0.00870923	0.00275004	0	0	0.009	0.386878	0.927885
TCGA.ZG.A9LZ.01	EPHA7-WT	0.112766	0	0.207635	0.116204	0	0.100383	0	0.118479	0.00512884	0	0	0.0457306	0.0224867	0.0154476	0.0854976	0.120603	0.0133243	0.00313308	0.0331825	0	0	0	0.009	0.397124	0.92231
TCGA.13.1408.01	EPHA7-WT	0	0.093175	0.163408	0.0724391	0	0.0575136	0	0.113678	0.0581033	0.0146124	0	0.0322799	0.0654692	0.0659067	0.0549762	0.173446	0	0	0	0.0349927	0	0	0.009	0.381096	0.925484
TCGA.EE.A2MH.06	EPHA7-WT	0.105301	0.103948	0.0290178	0.210399	0	0	0.0781197	0.0595751	0.119378	0	0	0.0373682	0.0393255	0.030661	0.0132897	0.131541	0	0.00398885	0.0380878	0	0	0	0.009	0.352393	0.938173
TCGA.BR.8590.01	EPHA7-WT	0.165787	0	0.101586	0.0654043	0	0.23783	0	0.00420486	0.0267111	0	0	0.0223334	0.0107929	0.0446117	0.021731	0.246991	0	0.00133301	0.0506837	0	0	0	0.009	0.409357	0.911971
TCGA.ED.A5KG.01	EPHA7-WT	0.210551	0.00695506	0.0240898	0.146989	0	0.240424	0	0.120384	0.0320467	0.00283256	0	0.0064645	0	0.0703865	0.0657073	0.0696931	0	0	0.00347669	0	0	0	0.009	0.359694	0.941062
TCGA.D3.A8GN.06	EPHA7-WT	0.01411	0	0.206296	0.314589	0	0	0.0140444	0.07149	0.0437085	0	0	0.0551689	0.050564	0.0320188	0.0479181	0.140761	0	0.00731503	0.00201648	0	0	0	0.009	0.373601	0.934449
TCGA.D7.6817.01	EPHA7-WT	0.0147094	0.226601	0.0636779	0.0874176	0	0.287606	0	0.0881447	0.0236652	0	0	0.0142644	0.0100278	0.0117579	0.0235271	0.0935677	0	0.0074618	0.0283364	0.00682188	0	0.0124129	0.009	0.402043	0.917486
TCGA.94.8490.01	EPHA7-WT	0.182882	0	0.113082	0.194892	0	0.0507964	0	0.115045	0	0	0	0.0398324	0.0361052	0	0.0506616	0.101291	0.0310683	0.0135318	0.0708123	0	0	0	0.009	0.373418	0.930551
TCGA.DD.AADK.01	EPHA7-WT	0.151814	0	0.102031	0.107105	0	0.0901887	0	0.0399836	0.064276	0	0	0.0573614	0.0411084	0.0273976	0.0555186	0.187692	0.0213122	0	0.054212	0	0	0	0.009	0.352047	0.937536
TCGA.85.7697.01	EPHA7-WT	0.0947131	0.0801681	0.0974828	0.0726184	0	0.118671	0	0.135522	0.00289703	0	0	0.00450481	0.00501674	0.0972826	0.0601191	0.180812	0	0.0231299	0.0270614	0	0	0	0.009	0.404936	0.914056
TCGA.AY.A54L.01	EPHA7-WT	0.13979	0	0.188228	0.0839652	0	0.15136	0.0318903	0.0288001	0.0252498	0	0	0.0645263	0.0135131	0.131708	0.00421844	0.0104066	0.0318936	0.00378588	0	0.0906643	0	0	0.009	0.385759	0.92812
TCGA.73.7499.01	EPHA7-WT	0.0892053	0	0.133498	0.200403	0	0.0190279	0.0413858	0.0566763	0.0378601	0.00927599	0	0.0580842	0.0179746	0.0280748	0.104302	0.124926	0.0153283	0	0.0639781	0	0	0	0.009	0.409241	0.912223
TCGA.A8.A0A7.01	EPHA7-WT	0.0540465	0	0.167282	0.264401	0	0.187721	0	0.0246741	0.0427787	0	0	0.0148965	0.00558398	0.0625462	0.0631644	0.10075	0	0	0.0121546	0	0	0	0.009	0.389025	0.926085
TCGA.18.3417.01	EPHA7-WT	0.11913	0	0.116883	0.0179058	0	0.139523	0	0.0114436	0	0	0.0678343	0	0	0.15178	0.0232682	0.224764	0.0003	0	0	0.123378	0	0.00376999	0.009	0.354403	0.939092
TCGA.IN.AB1V.01	EPHA7-WT	0.0176442	0.239244	0.0547081	0.267983	0	0.03622	0	0.113837	0.0231789	0	0.0828397	0	0.0505952	0	0	0.0685991	0	0.0376041	0.00754718	0	0	0	0.009	0.366819	0.938638
TCGA.GC.A6I3.01	EPHA7-WT	0.00893948	0.0358377	0.164688	0.161737	0	0	0.0389054	0.148416	0.0485418	0.0211071	0	0	0	0.0813363	0.0116987	0.220164	0	0.0323145	0	0.0263135	0	0	0.009	0.371753	0.930321
TCGA.D7.A6EY.01	EPHA7-MUT	0.203406	0.0203183	0.0368829	0.0892232	0	0.149796	0	0.132562	0.048161	0	0	0.0413481	0.00314105	0.04858	0.085611	0.13015	0	0	0.0104742	0	0	0.0003	0.009	0.369655	0.932548
TCGA.J4.A6G1.01	EPHA7-WT	0.22287	0.052579	0.0102219	0.118902	0	0.181353	0	0.140082	0.033994	0	0	0.00689055	0.00917637	0.087476	0.0083041	0.0976312	0	0.00158557	0.0289341	0	0	0	0.009	0.383509	0.927369
TCGA.60.2709.01	EPHA7-WT	0.0443981	0	0.143648	0.107076	0	0.0843234	0.0006	0.0297236	0.00796456	0	0	0.0370744	0	0.126082	0.0477516	0.344225	0.00580236	0	0.020422	0	0	0.0009	0.009	0.368382	0.932562
TCGA.86.A4P7.01	EPHA7-WT	0.0892755	0	0.139738	0.0971428	0	0.127864	0	0.0749966	0.0228206	0	0	0.0321369	0.0153744	0.0511014	0.0110054	0.322018	0	0	0.0163618	0	0	0.0002	0.009	0.390986	0.921128
TCGA.EW.A3E8.01	EPHA7-WT	0.130733	0	0.100893	0.0986643	0	0.195265	0	0.0942811	0.0389941	0	0	0.0231284	0.00776884	0.0504412	0.065535	0.124192	0	0	0.0701039	0	0	0	0.009	0.365901	0.932286
TCGA.39.5030.01	EPHA7-WT	0.0190478	0.0001	0.169301	0.107577	0	0.0553279	0.0322479	0.0517391	0.0478902	0	0	0.0354125	0	0.177718	0.0772284	0.215354	0	0	0.0110129	0	0	0	0.009	0.371656	0.931037
TCGA.EB.A4IS.01	EPHA7-WT	0.0809397	0.113779	0.0504362	0.237963	0	0.0293433	0	0.14454	0.0708455	0	0	0.0471095	0.00981083	0.0575094	0.0457343	0.104838	0	0	0.00715099	0	0	0	0.009	0.368122	0.934323
TCGA.E7.A97Q.01	EPHA7-WT	0.0211414	0.0555933	0.194502	0.14193	0.0173617	0	0.0177644	0.090512	0.00402904	0	0	0.0154349	0.0112984	0	0.127729	0.225152	0	0	0.0775523	0	0	0	0.009	0.371862	0.932796
TCGA.BR.A4QM.01	EPHA7-WT	0	0.299756	0.00267539	0.193992	0	0.159805	0	0.0591014	0.055914	0	0	0.0403324	0.00548705	0.0249221	0.0186022	0.123381	0	0	0.0160314	0	0	0	0.009	0.408395	0.914631
TCGA.D8.A3Z5.01	EPHA7-WT	0.0312869	0	0.27956	0.167989	0	0	0	0.134097	0	0	0	0.0933269	0.0231599	0	0.0396765	0.171305	0.00574327	0	0	0.0538555	0	0	0.009	0.420836	0.913998
TCGA.39.5040.01	EPHA7-WT	0.0699165	0.0543089	0.15153	0.0820224	0	0.219278	0	0.0465319	0	0	0.00265028	0.0153316	0.0115314	0.0006	0.0819302	0.262694	0	0	0.00162658	0	0	0	0.009	0.388191	0.92364
TCGA.G8.6914.01	EPHA7-WT	0.0273148	0.0596411	0.115754	0.176592	0	0	0.0350721	0.083912	0.0420386	0.0438935	0	0.0113229	0	0.188797	0.0556195	0.147689	0	0	0.0123531	0	0	0	0.009	0.37807	0.92694
TCGA.GV.A3QG.01	EPHA7-WT	0.248861	0	0.021124	0.0844086	0	0.0864866	0	0.0698919	0.0112642	0.00703746	0	0.0134909	0.0183211	0.147729	0.0889277	0.181281	0	0	0.0211757	0	0	0	0.009	0.415655	0.90928
TCGA.92.7340.01	EPHA7-WT	0.131772	0	0.123662	0.0825839	0	0.111389	0.0104659	0.0255224	0.00917214	0	0.0105201	0	0.00512061	0.037733	0.137564	0.187168	0	0.0740087	0.0412615	0	0	0.0120554	0.009	0.401122	0.917238
TCGA.AG.3732.01	EPHA7-WT	0.0982192	0.154074	0.0745856	0.145678	0	0.154733	0	0.0869964	0.0649445	0	0	0.0101996	0.0141346	0.0266931	0.0385251	0.100181	0	0	0.025679	0.00535752	0	0	0.009	0.418023	0.909431
TCGA.E9.A248.01	EPHA7-WT	0.0184085	0.0536058	0.14295	0.165838	0	0.178222	0.00653206	0.0334209	0.0109115	0.0501026	0	0.00561394	0	0.0284996	0.0745389	0.213052	0	0	0.0183037	0	0	0	0.009	0.398764	0.91775
TCGA.PG.A916.01	EPHA7-WT	0.166674	0	0.18238	0.0608284	0	0.108749	0	0.0342379	0.0555084	0	0	0.0614459	0.0142691	0.0907403	0.00838623	0.179061	0.0170264	0	0.0206937	0	0	0	0.009	0.409904	0.914511
TCGA.X4.A8KS.01	EPHA7-MUT	0.0412503	0	0.248449	0.200521	0	0.0520367	0	0.164981	0	0	0	0.0597583	0.0210241	0	0.0355437	0.126407	0.0014539	0	0.0485747	0	0	0	0.009	0.3668	0.942331
TCGA.86.8668.01	EPHA7-WT	0.0316425	0.0360415	0.149415	0.0499689	0	0.115205	0	0.0676426	0.0296202	0	0	0.026816	0.0135044	0	0.0643013	0.332214	0.0156411	0	0.0659983	0	0	0.00199015	0.009	0.36499	0.93212
TCGA.EB.A5SH.06	EPHA7-WT	0.19409	0	0.114916	0.208447	0	0	0	0.122763	0.0296598	0	0	0.0400335	0.00160648	0.0402232	0.0397769	0.187071	0	0	0.0214131	0	0	0	0.009	0.395382	0.920956
TCGA.34.5231.01	EPHA7-WT	0.103242	0	0.128959	0.176789	0	0.0188692	0	0.11531	0.0224504	0	0.0121292	0.0590527	0.0149856	0.0345029	0.129097	0.137169	0.0283313	0	0.0191126	0	0	0	0.009	0.350933	0.942279
TCGA.37.A5EN.01	EPHA7-WT	0.10803	0	0.106325	0.14699	0	0.0437421	0	0.101283	0.0135447	0	0.0209711	0	0	0.159648	0.111916	0.146696	0.0183011	0	0.0225533	0	0	0	0.009	0.35863	0.936455
TCGA.FD.A5BR.01	EPHA7-WT	0.171749	0.0173418	0.0770128	0.0994527	0	0.00269081	0.00867112	0.19681	0.035295	0	0	0.0203676	0.0364311	0.03373	0.00359047	0.217808	0	0.022724	0.056326	0	0	0	0.009	0.36663	0.9317
TCGA.61.2092.01	EPHA7-WT	0.142051	0	0.216747	0.0555644	0	0.0934216	0	0.021599	0.0564925	0	0	0.0234504	0.0614315	0.113923	0.00502714	0.177378	0	0.00873212	0	0.0241831	0	0	0.009	0.419167	0.91105
TCGA.43.6143.01	EPHA7-WT	0.215908	0	0.131569	0.0430563	0	0.0270693	0	0.0326756	0.0127899	0	0.0205325	0.0356732	0.0121866	0.146108	0.0430733	0.247183	0	0	0.0321753	0	0	0	0.009	0.401291	0.91899
TCGA.A1.A0SF.01	EPHA7-WT	0.0835477	0	0.170694	0.217166	0	0.148001	0	0.0184067	0.0293771	0	0	0.0655587	0.0133162	0	0.0474992	0.119537	0.0115028	0	0.0753934	0	0	0	0.009	0.402245	0.917503
TCGA.WA.A7H4.01	EPHA7-WT	0.155116	0	0.140824	0.0227963	0.00437781	0.0613543	0	0.0377247	0.00473151	0	0.0130801	0.0273552	0.0119597	0.280351	0.0198002	0.207984	0	0	0	0.0125447	0	0	0.009	0.398232	0.922731
TCGA.OL.A5RV.01	EPHA7-WT	0.158549	0	0.111862	0.133837	0	0.00274279	0	0.13464	0	0	0	0.0164474	0.0202189	0	0.0190318	0.222505	0.00612852	0	0.174039	0	0	0	0.009	0.405912	0.913515
TCGA.66.2778.01	EPHA7-WT	0.101298	0	0.142061	0.0475152	0	0.0822179	0.0094911	0.0523355	0	0	0	0	0	0.00454331	0.0160357	0.218165	0.0943202	0.0227031	0	0.0430381	0	0.166277	0.009	0.399932	0.916833
TCGA.CQ.A4C9.01	EPHA7-WT	0.0717683	0	0.189005	0.0633742	0	0.0118907	0	0.072605	0.00987109	0	0.0274695	0	0.0110677	0.206479	0.025482	0.241401	0.0105623	0	0	0.0590234	0	0	0.009	0.366357	0.937725
TCGA.63.7020.01	EPHA7-WT	0.103486	0	0.135964	0.13422	0	0.0630552	0	0.0561916	0.0107489	0	0	0.0703083	0.00491265	0.0562261	0.0596062	0.241659	0	0.0195128	0.0372252	0	0	0.0068833	0.009	0.399179	0.916754
TCGA.ZG.A9N3.01	EPHA7-WT	0.076031	0.290955	0.00157977	0.0880437	0	0.162557	0	0.15674	0.0297982	0	0	0.0524159	0.00362668	0.0141321	0.0248429	0.05465	0	0.0375085	0	0.00711987	0	0	0.009	0.417618	0.912075
TCGA.99.AA5R.01	EPHA7-WT	0.0940345	0.0358453	0.10193	0.136741	0	0.178356	0	0.103099	0	0	0	0.0494084	0.0138543	0.0169504	0.0375319	0.208125	0	0	0.00679928	0.017324	0	0	0.009	0.381061	0.925868
TCGA.22.5483.01	EPHA7-WT	0.0923982	0	0.128566	0.0997702	0	0.0261799	0	0.0363002	0.0321806	0	0	0.0396948	0	0.226742	0.029358	0.256545	0.00328045	0	0.019461	0	0	0.00952284	0.009	0.362118	0.936966
TCGA.FA.A4BB.01	EPHA7-WT	0.0375565	0.213578	0	0.133096	0	0	0.0226608	0.133537	0.0618826	0	0	0.0499856	0	0.161047	0.067999	0.0808848	0	0	0.0377727	0	0	0	0.009	0.398161	0.91708
TCGA.B6.A0IP.01	EPHA7-WT	0.183398	0.107166	0	0.152847	0	0.0802533	0	0.10815	0.0254713	0	0	0.0455351	0.0130285	0.0130038	0.0676878	0.147184	0.00372265	0	0.052553	0	0	0	0.009	0.374392	0.929737
TCGA.55.8514.01	EPHA7-WT	0.00233877	0.0534483	0.217224	0.0443171	0	0.0899061	0	0.0700707	0.00520257	0	0.0303592	0.00918	0.0447787	0.0294379	0.0475996	0.330121	0	0.0147967	0.00220011	0.00404771	0	0.00497184	0.009	0.41231	0.912523
TCGA.56.8624.01	EPHA7-WT	0.139321	0	0.142627	0.0473787	0	0.254318	0	0.0579551	0.00224889	0	0.0107265	0.0150341	0.0276246	0.00834479	0.0212018	0.20548	0.0187889	0	0.0489499	0	0	0	0.009	0.412369	0.910908
TCGA.AR.A0TQ.01	EPHA7-WT	0.149487	0	0.11085	0.0994869	0	0.189566	0.00467211	0.025682	0.00940159	0	0	0.0119861	0.00767502	0.162212	0.0536827	0.17121	0	0	0.00408828	0	0	0	0.009	0.406117	0.914132
TCGA.86.8674.01	EPHA7-WT	0.12064	0	0.187254	0.0465497	0	0	0	0.108587	0.0152541	0	0.0149966	0.00720676	0	0.259327	0	0.134113	0	0.0470767	0	0.0589951	0	0	0.009	0.386667	0.928938
TCGA.EJ.A6RC.01	EPHA7-WT	0.0696091	0.0688172	0.118203	0.108387	0	0.126503	0	0.1122	0.0122338	0	0	0.0703202	0.0231309	0.00446218	0.0103822	0.135526	0	0.00252076	0.137705	0	0	0	0.009	0.366961	0.932019
TCGA.TN.A7HJ.01	EPHA7-WT	0.143763	0	0.173838	0.0490942	0	0	0	0.092255	0.0205253	0.0230844	0.0002	0	0	0.0206886	0.0172916	0.225725	0.034679	0.0494978	0	0.128161	0	0.0211747	0.009	0.407367	0.914622
TCGA.CR.6470.01	EPHA7-WT	0.0947772	0	0.105486	0.181395	0	0.116548	0	0.121071	0.0539219	0	0	0.0100567	0	0.0656995	0.0870409	0.140208	0.0022754	0	0.0215202	0	0	0	0.009	0.361569	0.935735
TCGA.A2.A0YK.01	EPHA7-WT	0.200897	0	0.0757662	0.230215	0	0.159213	0	0.0877131	0.0181498	0	0	0.0318519	0.0109192	0	0.0436189	0.0887681	0.0201024	0	0.0327852	0	0	0	0.009	0.406697	0.916449
TCGA.13.1481.01	EPHA7-WT	0.0388539	0.0158476	0.169655	0.0862223	0	0.174538	0	0.075698	0.0353385	0	0	0.0376948	0.0255104	0.020335	0.0818135	0.169045	0	0	0	0.0694478	0	0	0.009	0.353493	0.939368
TCGA.EW.A2FS.01	EPHA7-WT	0.0200499	0.0984299	0.107358	0.118244	0	0.113042	0	0.179545	0	0.00342641	0	0.0694095	0.0120957	0.00611957	0.0703448	0.144299	0.0263554	0	0	0.0312804	0	0	0.01	0.331379	0.949784
TCGA.FS.A1ZF.06	EPHA7-WT	0	0.0147362	0.0005	0.0968277	0	0	0	0.0717596	0.0431581	0.006824	0.0184767	0	0	0.395217	0.0300666	0.248103	0	0	0.0599411	0	0.0143424	0	0.01	0.35025	0.9522
TCGA.FD.A43S.01	EPHA7-WT	0.117166	0.0191158	0.0764779	0.256176	0	0	0	0.192951	0.05212	0	0	0.0269813	0.0142426	0	0.00480836	0.189306	0	0.00483116	0.0458236	0	0	0	0.01	0.329779	0.952381
TCGA.5B.A90C.01	EPHA7-WT	0.166905	0	0.0773243	0.0646634	0	0.0384532	0	0.162972	0	0	0	0.0380844	0.00161333	0.0659463	0.0505333	0.241032	0	0.0800818	0.0123904	0	0	0	0.01	0.334375	0.946411
TCGA.CV.7261.01	EPHA7-WT	0.111951	0	0.145086	0.0431337	0	0.0489438	0.0131169	0.0361009	0	0	0	0.0138283	0	0.182779	0.1023	0.236882	0	0.00944677	0	0.0449072	0	0.0115246	0.01	0.33747	0.951239
TCGA.CR.6492.01	EPHA7-WT	0.0518173	0	0.158307	0.0739291	0	0.0919003	0	0.0312743	0	0	0	0.0560654	0.00464413	0.0497253	0.157443	0.199724	0.00217021	0.0105601	0.0801879	0	0	0.0322517	0.01	0.350132	0.942128
TCGA.75.7031.01	EPHA7-WT	0.0630801	0	0.129047	0.156167	0	0.122147	0.0063627	0.0600759	0.0142744	0	0	0.0602175	0.0176545	0.00583635	0.0858335	0.255805	0	0.00316891	0.015972	0	0	0.00435749	0.01	0.340434	0.944526
TCGA.A2.A0CR.01	EPHA7-WT	0.0905035	0	0.0911102	0.182796	0	0	0	0.145842	0.0761298	0.0247154	0	0.0818739	0.018714	0.0763604	0.0642036	0.0770828	0.00656195	0	0.0641073	0	0	0	0.01	0.341701	0.944286
TCGA.64.5781.01	EPHA7-WT	0.0592198	0	0.150243	0.214719	0	0	0.0330154	0.111437	0	0.0562004	0	0.193194	0	0.0267958	0.0361697	0.0580806	0.00824172	0	0.0422923	0	0.00333908	0.0070528	0.01	0.338851	0.96207
TCGA.FA.A7DS.01	EPHA7-WT	0.158157	0.217952	0	0.180619	0	0	0.150433	0.0471148	0	0	0.00987682	0.0283841	0.0211065	0.0007	0.0745356	0.0755073	0	0	0.0356599	0	0	0	0.01	0.348328	0.946038
TCGA.D3.A3CE.06	EPHA7-WT	0	0.0104938	0.182352	0.344105	0	0	0.0119877	0.0397916	0.032063	0	0	0.0962771	0.0567601	0	0.0710472	0.140243	0.00419198	0	0.0106874	0	0	0	0.01	0.335774	0.955403
TCGA.BH.A0AZ.01	EPHA7-WT	0.116655	0	0.0949718	0.118788	0	0.0983489	0	0.0168674	0.015145	0	0	0.0207776	0	0.0557691	0.0443262	0.347672	0.00426095	0	0.0606191	0	0	0.00579831	0.01	0.343312	0.94183
TCGA.UF.A7JF.01	EPHA7-WT	0.10479	0	0.128154	0.0388647	0	0	0	0.0725096	0.0152629	0.00470917	0.0272527	0	0.0002	0.228778	0	0.279517	0.00801166	0.00678217	0	0.085121	0	0	0.01	0.32899	0.956556
TCGA.33.4586.01	EPHA7-WT	0.135703	0	0.112258	0.0672565	0	0.0900566	0	0	0	0	0.0389635	0	0.026276	0.0736638	0.00876543	0.338196	0.0255462	0.016646	0	0.0666689	0	0	0.01	0.34643	0.942503
TCGA.RD.A8N1.01	EPHA7-WT	0.106625	0.0910567	0.0110547	0.100003	0	0.230172	0.0270285	0.0558942	0.0526553	0	0	0.0315539	0.00756832	0.042043	0.0681524	0.170207	0	0	0	0.005986	0	0	0.01	0.329081	0.949518
TCGA.CV.7238.01	EPHA7-WT	0.0994191	0	0.112537	0.132191	0	0.172016	0	0.048581	0.0158458	0	0.0305718	0	0	0.150826	0.0923422	0.144965	0.0002	0	0.0005	0	0	0	0.01	0.339756	0.945986
TCGA.NC.A5HK.01	EPHA7-MUT	0.0356167	0	0.198802	0.138401	0	0.0186258	0.0130623	0.0619262	0.00539949	0	0	0.125061	0.0244165	0.0364237	0.0217767	0.0528575	0	0.229222	0	0.0304267	0	0.00798202	0.01	0.332961	0.957715
TCGA.AC.A6IX.01	EPHA7-WT	0.104269	0	0.103874	0.0815029	0	0.0905356	0	0.0638905	0.0174002	0	0	0.0709858	0.0113156	0	0.0364214	0.274104	0	0.00985518	0.135353	0	0	0.0005	0.01	0.346926	0.938924
TCGA.AO.A129.01	EPHA7-WT	0.117697	0	0.0829873	0.124096	0	0.0498882	0	0.163739	0.0135009	0	0	0.0225587	0.00169595	0.084711	0.181323	0.130287	0	0	0.027516	0	0	0	0.01	0.330802	0.953676
TCGA.D8.A140.01	EPHA7-WT	0.018196	0.00896042	0.156799	0.146072	0	0.12546	0	0.0685989	0.048557	0	0	0.0390929	0.00757027	0.0007	0.0512716	0.249314	0	0	0.0793642	0	0	0	0.01	0.329632	0.948386
TCGA.CN.5374.01	EPHA7-WT	0.0299297	0.163885	0.00266826	0.194652	0	0.0727469	0	0.167219	0.0602728	0	0	0.0185542	0	0.0670336	0.0921143	0.105653	0.00510101	0	0.0201703	0	0	0	0.01	0.332886	0.949924
TCGA.B5.A3FA.01	EPHA7-MUT	0.111208	0	0.114564	0.170069	0	0	0	0.173056	0.0174406	0	0	0.0641741	0.0258968	0.0331744	0.0749022	0.142544	0	0.0729704	0	0	0	0	0.01	0.331171	0.950527
TCGA.CN.4731.01	EPHA7-WT	0.114664	0	0.13629	0.0855048	0	0.0580532	0	0.0920312	0.0105123	0	0.0852581	0.00755834	0.0323923	0.149927	0.0218828	0.0692544	0.0374821	0.0991894	0	0	0	0	0.01	0.349701	0.940219
TCGA.XF.A9T5.01	EPHA7-WT	0.10182	0	0.0772196	0.173647	0	0.0224249	0.0655796	0.0510751	0.0331469	0	0	0.0164232	0	0.137133	0.0758043	0.217476	0.0229922	0	0.00167951	0.00357911	0	0	0.01	0.337871	0.943972
TCGA.LL.A5YN.01	EPHA7-WT	0.0858724	0.00388947	0.0752027	0.114703	0	0	0.0310412	0.167795	0.0663421	0.0918696	0	0.00396568	0	0.112091	0.0586816	0.140749	0.0185139	0	0.0292834	0	0	0	0.01	0.335369	0.945084
TCGA.D7.8570.01	EPHA7-WT	0.104312	0	0.0752242	0.0877981	0	0.193527	0.0509624	0.0317431	0.032113	0	0.00416844	0.0235632	0.0157389	0.0458866	0.0444106	0.23121	0.0458824	0	0.00420757	0.00925183	0	0	0.01	0.336658	0.943236
TCGA.XF.AAMJ.01	EPHA7-WT	0.139963	0	0.0952299	0.111281	0	0	0	0.0879995	0.00415851	0	0	0.0458574	0.00760749	0.0831815	0.0595498	0.216432	0	0.00150441	0.132847	0	0	0.0143882	0.01	0.329677	0.946841
TCGA.V1.A8ML.01	EPHA7-WT	0.0596559	0	0.193404	0.138265	0	0.0799776	0	0.104802	0	0	0	0.048257	0.00879864	0	0.0426844	0.216726	0	0	0.107429	0	0	0	0.01	0.344502	0.944165
TCGA.34.5232.01	EPHA7-WT	0.072294	0.0685918	0.0427964	0.0748919	0	0.114275	0	0.113267	0.0650697	0	0.0457035	0	0.0166105	0.0977756	0.0442003	0.176311	0.0110643	0.042957	0.00543635	0.00875559	0	0	0.01	0.329586	0.946454
TCGA.50.5941.01	EPHA7-WT	0.104307	0	0.0849676	0.123231	0	0.144356	0.0106531	0.0616694	0.0458703	0	0	0.0375644	0.0211835	0.017982	0.108344	0.167373	0.0121611	0.00175066	0.0585873	0	0	0	0.01	0.349571	0.938755
TCGA.AC.A2FG.01	EPHA7-WT	0.0704677	0	0.118518	0.12224	0	0.0801191	0	0.04315	0.0208598	0	0	0	0.0249758	0.0274608	0.0138638	0.277647	0.0727854	0	0.127912	0	0	0	0.01	0.33113	0.945528
TCGA.99.8028.01	EPHA7-WT	0.0292861	0	0.131957	0.136799	0	0.105012	0	0.0674239	0.0571339	0	0	0.00648466	0.0004	0.0586144	0.105201	0.290731	0.0009	0	0.0100484	0	0	0	0.01	0.333496	0.948044
TCGA.22.1012.01	EPHA7-WT	0.0956391	0	0.088705	0.0893114	0	0.00512896	0	0.06352	0.0144228	0	0.0150864	0	0	0.274994	0.0398961	0.176334	0.0008	0	0	0.134258	0.00195126	0	0.01	0.344622	0.947118
TCGA.29.1781.01	EPHA7-WT	0	0.0244409	0.142442	0.198965	0	0.062262	0.00133941	0.0612961	0.0210534	0	0	0.0590852	0.0193521	0.0553181	0.0704122	0.271986	0	0	0	0.012048	0	0	0.01	0.327695	0.950873
TCGA.A2.A25A.01	EPHA7-WT	0.156887	0	0.0620664	0.113992	0	0.177778	0	0.0234431	0.0289865	0	0	0.0378104	0.00973784	0	0.0809416	0.154444	0.0242027	0	0.129711	0	0	0	0.01	0.328684	0.947348
TCGA.52.7811.01	EPHA7-WT	0.124527	0	0.0891312	0.0346487	0	0.0924299	0	0.0659582	0	0	0.0211928	0	0	0.218403	0.0366985	0.263182	0.00410052	0	0	0.0426264	0	0.00710186	0.01	0.329454	0.951987
TCGA.34.2596.01	EPHA7-MUT	0.155086	0.021464	0.0501143	0.0396658	0	0.189586	0	0.118529	0	0	0	0.0327682	0.0120985	0.0005	0.0333617	0.327497	0	0	0.0127761	0	0	0.00659928	0.01	0.339002	0.944355
TCGA.66.2783.01	EPHA7-WT	0	0.0403593	0.153065	0.102879	0	0.152237	0.00403105	0.0285437	0.00485008	0	0.0394297	0	0.0699276	0.009671	0.0357249	0.31875	0.0108568	0	0.0154643	0.00674899	0	0.00746186	0.01	0.349828	0.939171
TCGA.AA.3713.01	EPHA7-WT	0.149702	0	0.0761545	0.149164	0	0.163974	0.0007	0.0502064	0.0260142	0	0	0.0763845	0.0269734	0.0335549	0.0368863	0.170182	0.00803088	0	0.0321007	0	0	0	0.01	0.336574	0.946054
TCGA.EB.A5KH.06	EPHA7-WT	0.0814349	0.133098	0.0405568	0.14367	0	0.0686027	0	0.0870562	0.0997434	0	0	0.0498836	0.0306589	0.042733	0.0161421	0.154722	0	0	0.0516986	0	0	0	0.01	0.333028	0.946846
TCGA.77.6845.01	EPHA7-WT	0.00375534	0.0640927	0.175257	0.0984475	0	0.00641146	0	0.0694354	0	0	0.0258303	0	0.0380872	0.00422046	0.00476399	0.393123	0	0.0739824	0.0142509	0.0153062	0	0.0130362	0.01	0.341056	0.946277
TCGA.24.2280.01	EPHA7-WT	0.103952	0	0.157298	0.0766713	0	0	0	0.0849305	0.0141058	0	0	0.0284879	0.0237752	0.0197533	0.00953861	0.461648	0	0	0	0.0196659	0	0.0002	0.01	0.34267	0.949232
TCGA.3C.AAAU.01	EPHA7-WT	0.104188	0.00348924	0.14942	0.105988	0	0	0	0.0980054	0	0	0.0532578	0	0.0103585	0.0296219	0.0253081	0.395067	0	0	0	0.0252971	0	0	0.01	0.336606	0.94924
TCGA.55.6987.01	EPHA7-MUT	0.0199265	0.0368209	0.118025	0.191244	0	0.0738275	0	0.0941052	0.0150762	0	0	0.0863704	0.0250977	0.0451457	0.118008	0.128698	0	0	0.0468328	0	0	0.0008	0.01	0.33687	0.947584
TCGA.LL.A7SZ.01	EPHA7-WT	0	0.0208371	0.153441	0.112744	0	0.0416288	0	0.162672	0.0694005	0.00291038	0	0.0175014	0	0.0309233	0.0640928	0.30337	0.00526779	0	0.0152122	0	0	0	0.01	0.341697	0.944249
TCGA.E2.A1L8.01	EPHA7-WT	0.148854	0	0.0899905	0.0904997	0	0.0682119	0	0.0546796	0.00738087	0.00393137	0	0.0377902	0	0	0.0533782	0.159259	0.203823	0.0483898	0.0301427	0	0	0.00366892	0.01	0.348447	0.938623
TCGA.50.8459.01	EPHA7-WT	0.0738266	0	0.104743	0.0590891	0	0.0845735	0.0307944	0.0076809	0.023977	0	0.0557996	0	0.0823198	0	0.0170338	0.325046	0.0918903	0.00102258	0.0366713	0	0	0.00553259	0.01	0.341306	0.941194
TCGA.GS.A9TU.01	EPHA7-WT	0.104054	0.0835237	0	0.195662	0	0	0.0511542	0.0828154	0.100586	0	0	0.0396744	0.0241099	0.148644	0.0568954	0.0976781	0.00702518	0	0.00817767	0	0	0	0.01	0.327767	0.949068
TCGA.D8.A27N.01	EPHA7-WT	0.115481	0	0.105401	0.0516027	0	0.0793667	0	0.0128095	0.0132911	0	0	0.0176269	0	0.185205	0.0227581	0.323057	0	0	0.0647107	0	0	0.00869074	0.01	0.345693	0.944165
TCGA.50.5939.01	EPHA7-WT	0	0.0604295	0.129767	0.0192066	0	0.13723	0.00670698	0.0625146	0	0	0.0224808	0.0071909	0.0127139	0.0523946	0.0350398	0.408161	0	0	0	0.0299994	0	0.016165	0.01	0.331774	0.949037
TCGA.UF.A71E.01	EPHA7-WT	0	0.0178102	0.228266	0.0524409	0	0	0	0.12899	0	0.00473107	0.0001	0	0	0.246195	0	0.154137	0.0995046	0.0398054	0	0.015887	0	0.012153	0.01	0.342856	0.952945
TCGA.G8.6906.01	EPHA7-WT	0.0894569	0.288117	0.022792	0.157267	0	0	0.0410003	0.071241	0.0229121	0	0.0212143	0.0124729	0	0.142268	0.0290988	0.100722	0	0	0	0.00143822	0	0	0.01	0.346727	0.947545
TCGA.ED.A7XO.01	EPHA7-WT	0.0465343	0	0.188809	0.110638	0	0.0732495	0	0.0694149	0.00785232	0	0	0.0781157	0.0227275	0	0.0353894	0.228038	0	0	0	0.118761	0	0.020471	0.01	0.33005	0.952444
TCGA.KK.A6E5.01	EPHA7-WT	0.0301203	0.0225407	0.194579	0.0874392	0	0.174406	0	0.122938	0	0	0	0.0432799	0.00607025	0.0110066	0.0675918	0.166073	0.00751531	0	0.0664394	0	0	0	0.01	0.340041	0.947146
TCGA.50.5049.01	EPHA7-MUT	0.0349144	0	0.129865	0.178193	0	0.163536	0	0.0597294	0.0382146	0	0	0.024	0.0230504	0.0578145	0.0644968	0.210047	0.00914228	0	0	0.00438219	0	0.00261468	0.01	0.337666	0.945755
TCGA.50.6597.01	EPHA7-WT	0	0.0357285	0.143264	0.127386	0	0.135983	0	0.0559774	0.121301	0.00589887	0	0	0.0166692	0	0.0859131	0.142612	0.109236	0.00341787	0.0166138	0	0	0	0.01	0.346731	0.940692
TCGA.37.4141.01	EPHA7-WT	0.0724526	0	0.115909	0.162647	0	0.115862	0	0.0608856	0.014176	0	0	0.0263766	0.0120516	0.0106033	0.0528561	0.326237	0	0	0	0.0295562	0	0.0004	0.01	0.329337	0.948986
TCGA.AR.A24N.01	EPHA7-WT	0.0748749	0	0.135802	0.0624226	0	0.108853	0	0.0925461	0.00527662	0	0	0.0322229	0	0.0214295	0.0425596	0.369677	0.00151988	0.00395933	0.0488571	0	0	0	0.01	0.327809	0.949645
TCGA.VQ.A91E.01	EPHA7-MUT	0.0749084	0.0420689	0.123119	0.131906	0	0.227841	0	0.115881	0	0	0	0.121424	0.0110014	0.0117692	0.0230906	0.0864873	0	0.00639393	0.0208234	0	0	0.00328531	0.01	0.333883	0.955399
TCGA.06.2570.01	EPHA7-WT	0.021217	0	0	0.0158367	0	0.0844527	0	0.0301178	0.0529668	0	0.0344192	0.00687588	0.0627836	0.00100605	0.00305913	0.614809	0	0	0	0.0154798	0	0.0569763	0.01	0.329749	0.95983
TCGA.55.8621.01	EPHA7-WT	0.0109517	0	0.147587	0.0774446	0	0.0968734	0	0.0186212	0.00402882	0	0.00386377	0.0355733	0.0401657	0.10117	0.0665992	0.301818	0.00753189	0.00261801	0.0843345	0	0	0.0008	0.01	0.330038	0.947893
TCGA.HC.A4ZV.01	EPHA7-WT	0.0585231	0.0855834	0.100123	0.114565	0	0.190898	0	0.0830373	0.00209673	0	0	0.0442812	0.00713038	0.0668649	0.0361221	0.164167	0.00834609	0	0.0382614	0	0	0	0.01	0.341637	0.943311
TCGA.VQ.A8E2.01	EPHA7-WT	0.166025	0	0.0795822	0.0997577	0	0.0850545	0.0460907	0.109425	0	0	0.00400599	0.0174731	0	0.218134	0.0550999	0.112202	0	0	0	0.00715014	0	0	0.01	0.330377	0.950125
TCGA.CG.5732.01	EPHA7-WT	0.050267	0.0782585	0.0941882	0.187546	0	0.101783	0	0.129996	0.0455862	0	0	0.0504352	0.00367819	0.0273055	0.0256124	0.13513	0	0.00555811	0	0.0539671	0	0.0106879	0.01	0.34491	0.94393
TCGA.A2.A4RX.01	EPHA7-WT	0.171381	0.0455662	0.0134536	0.071977	0	0.198686	0	0.101034	0.00225917	0	0	0.00608454	0	0.151794	0.0524095	0.167503	0	0	0.0178518	0	0	0	0.01	0.334806	0.947158
TCGA.E9.A1NC.01	EPHA7-WT	0.0992058	0	0.111153	0.099326	0	0.0794814	0	0.107484	0.0265602	0	0.00259045	0.0165289	0	0.118556	0.205863	0.0971818	0.00815745	0	0.0279117	0	0	0	0.01	0.348464	0.947509
TCGA.HC.7213.01	EPHA7-WT	0.135183	0	0.119463	0.0457807	0	0.176176	0	0.0620685	0.00553245	0	0	0.0373955	0.0335245	0.0359103	0.0280498	0.205985	0.0437549	0.00726617	0.0639107	0	0	0	0.01	0.341707	0.941802
TCGA.44.5643.01	EPHA7-WT	0.120531	0	0.078603	0.123125	0	0.076556	0.0422411	0.0413564	0.0405855	0	0.0187611	0	0.0090538	0.029804	0.0701135	0.317481	0.00663058	0	0.0251574	0	0	0	0.01	0.348433	0.938827
TCGA.QS.A5YQ.01	EPHA7-WT	0.039645	0	0.159073	0.258348	0	0	0	0.160087	0.0734823	0	0	0.00860576	0.0173686	0.115843	0.0131263	0.138412	0.00353064	0	0.012479	0	0	0	0.01	0.340926	0.948211
TCGA.13.0797.01	EPHA7-WT	0	0.151193	0.0890861	0.202259	0	0.00592126	0	0.0526246	0.0677808	0	0	0.133561	0.0354213	0.0365581	0.0367997	0.1411	0.00720804	0	0.0404868	0	0	0	0.01	0.333315	0.94933
TCGA.73.7498.01	EPHA7-WT	0.00596793	0.0203565	0.150361	0.0556621	0	0.199657	0	0.0346235	0.0203431	0	0	0.015667	0.0703684	0	0.0140497	0.327384	0	0.00664837	0.0789111	0	0	0	0.01	0.328248	0.948019
TCGA.97.8174.01	EPHA7-WT	0.0688179	0	0.118074	0.0660005	0	0.167105	0	0.0108707	0	0	0	0.0150036	0.0439772	0	0.0401482	0.371342	0	0.0423965	0.0562643	0	0	0	0.01	0.338768	0.943362
TCGA.DK.A1AC.01	EPHA7-WT	0.0657093	0	0.157073	0.196192	0	0.0368372	0.0236793	0.0721516	0.0301379	0	0	0.0843414	0.009571	0.0818326	0.0590557	0.122084	0	0	0	0.0593225	0.0006	0.00142035	0.01	0.350076	0.942491
TCGA.PQ.A6FN.01	EPHA7-WT	0.125338	0	0.106657	0.0960617	0	0	0	0.0951578	0.0122433	0	0.0496086	0	0	0.203735	0.0760836	0.201821	0	0	0	0.0332937	0	0	0.01	0.333914	0.949253
TCGA.55.6543.01	EPHA7-WT	0.131189	0	0.108818	0.0331665	0	0.111584	0	0.0138574	0.00738564	0	0.00550797	0.00125077	0.0300721	0.10157	0.0297891	0.3565	0	0.00268175	0.00664641	0.0260959	0	0.0338856	0.01	0.348082	0.942652
TCGA.85.8354.01	EPHA7-WT	0	0.062299	0.142808	0.136954	0	0	0	0.12307	0	0	0	0.0100315	0	0.139493	0.045681	0.259482	0.00818487	0	0	0.0622778	0.0008	0.00887011	0.01	0.345039	0.942987
TCGA.CU.A5W6.01	EPHA7-WT	0.0675313	0	0.159946	0.171594	0	0	0.00156213	0.0671033	0.0229656	0	0	0	0.0774925	0.0486917	0.0971604	0.144794	0	0.0238021	0	0.0941392	0	0.0231944	0.01	0.342946	0.943887
TCGA.A8.A06R.01	EPHA7-WT	0.0414317	0	0.13181	0.0400788	0	0.0896511	0.00593521	0.0737572	0.0279026	0	0	0.0177427	0	0.183698	0.0966033	0.246847	0	0	0.0418318	0	0	0.00270992	0.01	0.34046	0.945131
TCGA.EJ.7321.01	EPHA7-WT	0.129283	0	0.149586	0.118093	0	0.203157	0	0.115613	0.0004	0	0	0.0402972	0.00617904	0	0.109261	0.0778886	0.0108925	0.00974717	0.0296416	0	0	0	0.01	0.333276	0.955449
TCGA.BH.A18M.01	EPHA7-WT	0.123134	0	0.0907101	0.0710049	0	0.187969	0	0.0136555	0	0	0	0.0166026	0.0255342	0	0.0306065	0.25952	0.0120505	0	0.16655	0	0	0.00266377	0.01	0.338455	0.942472
TCGA.33.4582.01	EPHA7-WT	0.117063	0	0.120632	0.171273	0	0	0.0154466	0.120178	0	0	0	0.105423	0.0136699	0	0.075743	0.201205	0.0108189	0.0478271	0.0007	0	0	0	0.01	0.350531	0.942142
TCGA.HD.8635.01	EPHA7-WT	0.046098	0	0.168006	0.0951098	0	0.0609554	0	0.0391215	0	0	0.0078188	0.0149176	0.0807393	0.107762	0.0666338	0.249827	0	0.00553399	0	0.0574771	0	0	0.01	0.347198	0.942128
TCGA.G2.AA3B.01	EPHA7-WT	0	0.0688792	0.197029	0.154568	0	0	0.0486854	0.237925	0.0488075	0	0	0.0442227	0.0069723	0	0.0289697	0.0906103	0	0.0682951	0	0.00503555	0	0	0.01	0.350521	0.947751
TCGA.G9.7510.01	EPHA7-MUT	0.0761963	0	0.171913	0.0779839	0	0.0786718	0	0.115868	0	0	0	0.0628714	0.0142717	0.0615047	0.0442658	0.2334	0	0	0.00994219	0.0531114	0	0	0.01	0.336164	0.947767
TCGA.43.A56V.01	EPHA7-WT	0	0.116038	0.100294	0.0409175	0	0.0600231	0	0.120539	0	0	0.0290863	0	0.00556395	0.0451444	0.0335857	0.297374	0	0.0709361	0.00440368	0.0400858	0	0.0360087	0.01	0.346088	0.939694
TCGA.LD.A7W5.01	EPHA7-WT	0.134442	0	0.063623	0.123449	0	0.162869	0	0.146299	0.0850764	0	0	0.0241559	0.0192714	0.0522105	0.0569329	0.119677	0	0	0.0119936	0	0	0	0.01	0.328542	0.951705
TCGA.BH.A0BL.01	EPHA7-WT	0.159919	0	0.0629131	0.0611051	0	0.0936685	0	0.0911453	0.0137194	0.00933796	0	0.00625765	0.00416918	0	0.199146	0.161784	0.113559	0	0.0232766	0	0	0	0.01	0.343787	0.94695
TCGA.FF.A7CW.01	EPHA7-MUT	0.0437087	0.301185	0	0.219978	0	0	0.0505489	0.109802	0.0421613	0	0	0.0249252	0	0.0898287	0.0231622	0.0872405	0	0	0.0074596	0	0	0	0.01	0.344929	0.947179
TCGA.NH.A8F8.01	EPHA7-WT	0.10634	0	0.152964	0.0439114	0	0.056545	0	0.0534088	0.0199384	0	0.0412031	0	0.0070062	0.116596	0.0841064	0.274342	0	0	0	0.0436386	0	0	0.01	0.327536	0.953301
TCGA.YL.A8SL.01	EPHA7-WT	0.0569925	0.0928728	0.121283	0.146368	0	0.0219433	0	0.155335	0	0	0	0.0751635	0.0310532	0.0179109	0.0418612	0.205459	0.0138927	0.0001	0.019801	0	0	0	0.01	0.343675	0.943749
TCGA.MP.A4SV.01	EPHA7-WT	0.0062694	0.0198079	0.165135	0.1296	0	0.140772	0	0.0686232	0.046426	0	0	0.0314084	0.00725299	0.0214966	0.11306	0.216873	0	0.00363479	0.029641	0	0	0	0.01	0.344551	0.9439
TCGA.V1.A8WL.01	EPHA7-WT	0.0803114	0.0509029	0.122583	0.148683	0	0.214855	0	0.0879781	0.0117091	0	0	0.058034	0.00717924	0.0160908	0.0419692	0.0659419	0	0.0117365	0.0820259	0	0	0	0.01	0.330976	0.952622
TCGA.CR.6481.01	EPHA7-WT	0.0874397	0	0.0909506	0.175099	0	0.0885271	0.0146683	0.0787517	0.0518439	0	0	0.0245304	0.00136047	0.127871	0.104809	0.126883	0.00134809	0	0.0243861	0	0	0.00153151	0.01	0.345377	0.941966
TCGA.66.2793.01	EPHA7-WT	0.0778013	0	0.184063	0.178337	0	0	0	0.0569691	0.0001	0	0.00727422	0.00356358	0.0004	0.0995733	0.0479371	0.321578	0	0	0.00802635	0	0	0.0143876	0.01	0.340888	0.949129
TCGA.D8.A27M.01	EPHA7-WT	0.0324055	0.156201	0.0149955	0.0986881	0	0.110783	0.00227289	0.07077	0.0371453	0	0	0.0374829	0.00461708	0.0522361	0.19236	0.151318	0.0123428	0	0.0263816	0	0	0	0.01	0.328965	0.953581
TCGA.UY.A9PD.01	EPHA7-WT	0.0838166	0	0.168737	0.0309897	0.0683514	0	0	0.0747343	0.0298989	0.007482	0	0.00730715	0	0.264462	0.0823133	0.163578	0	0	0.0183295	0	0	0	0.01	0.33661	0.952914
TCGA.DM.A28H.01	EPHA7-WT	0.145779	0	0.145198	0.0534878	0	0.0732161	0	0.0788879	0	0	0.00253011	0.00686835	0.00136032	0.0908726	0.0452467	0.292413	0.00463715	0	0	0.0595034	0	0	0.01	0.350318	0.94269
TCGA.OL.A5RX.01	EPHA7-WT	0.187641	0	0.0734924	0.128875	0	0.149124	0	0.146325	0.001445	0	0	0.0425789	0.018772	0	0.0279222	0.180288	0.00109589	0	0.0424396	0	0	0	0.01	0.329761	0.951181
TCGA.A2.A04U.01	EPHA7-WT	0.0899396	0	0.15302	0.0813268	0	0	0	0.0793805	0.0416478	0	0	0.0343884	0	0.28476	0.0167474	0.188852	0	0.00724349	0.0226952	0	0	0	0.01	0.344237	0.948497
TCGA.55.7907.01	EPHA7-WT	0.0871859	0	0.103508	0.135489	0	0.132193	0.00368237	0.0452628	0.0270993	0	0	0.0551695	0.00571974	0.0412544	0.0755937	0.254637	0	0	0.0295776	0	0	0.00362727	0.01	0.341303	0.942752
TCGA.QG.A5Z2.01	EPHA7-WT	0.276366	0.0259844	0.00119169	0.166382	0	0.118522	0	0.148441	0.0495469	0	0	0.030013	0.00943213	0.0197993	0.0367896	0.0968029	0	0.00693931	0.0137903	0	0	0	0.01	0.338895	0.953805
TCGA.RQ.AAAT.01	EPHA7-WT	0.222107	0.235169	0	0.0852559	0	0	0.0673242	0.0805721	0	0	0.0248161	0.00720737	0.0495891	0.0624151	0.00169	0.1121	0	0.0290935	0.0218502	0	0	0.0008	0.01	0.340934	0.953778
TCGA.BB.8601.01	EPHA7-WT	0.0909904	0	0.15475	0.0806322	0	0.152044	0	0.0532601	0.00517171	0	0	0.00718945	0.0118684	0.0627411	0	0.0590723	0.0746238	0.0518934	0.0822973	0.11035	0	0.00311611	0.01	0.33877	0.945103
TCGA.CV.A465.01	EPHA7-WT	0.0410292	0	0.202795	0.0308087	0.0273596	0	0	0.0807115	0	0	0.00334196	0.00415241	0	0.149874	0.0962494	0.158998	0.101246	0.0324799	0.0120011	0.0543086	0	0.00464375	0.01	0.333747	0.952793
TCGA.EW.A1PB.01	EPHA7-WT	0.0101191	0	0.0001	0.113184	0	0.0676977	0.00538936	0.104224	0.0072444	0	0	0.050352	0	0	0.246821	0.375216	0.00201423	0	0.0081825	0	0	0.00945273	0.01	0.330524	0.966036
TCGA.04.1343.01	EPHA7-WT	0	0.0978281	0.13399	0.161905	0	0.0206424	0	0.107373	0.0428163	0	0	0.0831247	0.0262787	0.00145859	0.0367982	0.145627	0	0.0005	0	0.138697	0	0.002969	0.01	0.341273	0.94657
TCGA.FF.8041.01	EPHA7-WT	0	0.21456	0	0.201054	0	0	0.034191	0.06947	0.0283285	0.0165638	0	0.0203308	0	0.254483	0.0539843	0.0806814	0	0	0.0263533	0	0	0	0.01	0.338926	0.945616
TCGA.66.2727.01	EPHA7-WT	0.0683645	0	0.114354	0.0866025	0	0.080002	0.00705831	0.0408761	0.00374154	0	0.0009	0.0171007	0.0161577	0.0215933	0.111822	0.34648	0.0556568	0	0.00873744	0.0101427	0	0.0103693	0.01	0.331483	0.948514
TCGA.JY.A93E.01	EPHA7-WT	0.0651012	0.0831296	0.0566192	0.0987864	0	0.264242	0	0.0103205	0.0561636	0	0	0.01754	0.00758886	0.0432492	0.0692972	0.208103	0	0	0.0166226	0.0014997	0	0.00173687	0.01	0.328043	0.948969
TCGA.A7.A4SF.01	EPHA7-WT	0.0970733	0	0.111233	0.0864852	0	0.0924543	0	0.0801904	0.0229792	0	0.025479	0	0	0.164929	0.0850339	0.171102	0	0	0.0630409	0	0	0	0.01	0.33899	0.943893
TCGA.66.2765.01	EPHA7-WT	0.0536449	0	0.114575	0.088074	0	0.141433	0.0102766	0.0246128	0.0109349	0	0.0172009	0.0106929	0.0214116	0	0.0867617	0.271585	0.117187	0	0.0217587	0	0	0.00985176	0.01	0.329537	0.946483
TCGA.AR.A1AX.01	EPHA7-WT	0.0914674	0.1189	0	0.168935	0	0.212234	0	0.0694458	0.0436674	0	0	0.0111673	0.0100541	0.0247809	0.050933	0.0781399	0	0	0.120275	0	0	0	0.01	0.334194	0.94811
TCGA.G3.A7M6.01	EPHA7-WT	0	0.0814874	0.144686	0.0805269	0	0.199263	0	0.0910313	0.00777171	0	0	0.00816673	0.0297812	0.0547604	0.0593864	0.24314	0	0	0	0	0	0	0.01	0.333167	0.948272
TCGA.78.7153.01	EPHA7-WT	0.0455827	0.0091157	0.160167	0.237786	0	0.0722307	0	0.0894034	0.0812055	0	0	0.0425454	0.0272828	0	0	0.199204	0.00243355	0.00622717	0	0.0229656	0	0.0038498	0.01	0.343978	0.946743
TCGA.B6.A0RE.01	EPHA7-WT	0.091836	0	0.159729	0.0770622	0	0.0248743	0	0.126254	0.00902224	0	0	0	0	0.207514	0.0403337	0.224656	0.00199517	0.0221984	0.0114017	0	0	0.00312327	0.01	0.3438	0.947001
TCGA.S3.A6ZH.01	EPHA7-WT	0.0749753	0	0.146104	0.0803838	0	0.029737	0	0.0674748	0.0272997	0	0	0.0254957	0.0126984	0	0.0847746	0.17489	0.0381776	0.0485388	0.189451	0	0	0	0.01	0.333667	0.94581
TCGA.13.1499.01	EPHA7-WT	0.0854915	0.0368898	0.0760126	0.11192	0	0.145392	0	0.142416	0.0605952	0	0	0.0470185	0.0622648	0	0.064022	0.15494	0	0	0	0.0130373	0	0	0.01	0.330497	0.949051
TCGA.SW.A7EB.01	EPHA7-WT	0.255799	0.00208965	0.014414	0.0985585	0	0.219461	0	0.109386	0.0475617	0	0	0.0664787	0.0140749	0	0.0146043	0.104488	0	0.0245393	0	0.0285454	0	0	0.01	0.333882	0.953868
TCGA.IG.A7DP.01	EPHA7-WT	0.0803245	0	0.0937142	0.235859	0	0.163237	0.0367452	0.0358857	0.0414061	0	0	0.0222852	0.0274571	0.0169055	0.128293	0.0950402	0.0051264	0	0.0177215	0	0	0	0.01	0.340911	0.948009
TCGA.DK.A3IU.01	EPHA7-WT	0.139987	0	0.0427339	0.21377	0	0.110339	0	0.0665268	0.021258	0	0	0.0490583	0.00550925	0.0548555	0.126168	0.160675	0	0	0	0.0046445	0	0.00447436	0.01	0.329269	0.952503
TCGA.L3.A4E7.01	EPHA7-WT	0.0530062	0	0.163335	0.0443544	0	0.0876732	0	0.0717207	0.0002	0	0.0390812	0.00832744	0.0171054	0.151275	0.0618022	0.210909	0	0.0140268	0.00342644	0.0512266	0	0.0225046	0.01	0.331132	0.9494
TCGA.53.7624.01	EPHA7-WT	0.103515	0	0.115781	0.12597	0	0.0337993	0	0.0764931	0.0187712	0	0	0.0343115	0	0.141331	0.147662	0.177923	0	0.00389194	0	0.0188189	0	0.00173197	0.01	0.331532	0.952262
TCGA.V1.A9OL.01	EPHA7-WT	0.11897	0	0.149888	0.135945	0	0.18431	0	0.0457134	0.0376307	0	0	0.0503117	0.00802908	0.027643	0.0495826	0.135314	0.0220678	0	0.0345952	0	0	0	0.01	0.34856	0.942917
TCGA.85.8049.01	EPHA7-WT	0.0507163	0.00263166	0.120961	0.0783566	0	0.148668	0	0.0513542	0.00406023	0	0	0.0284464	0.0130361	0.186652	0.0761279	0.197812	0	0	0	0.0403524	0	0.0008	0.01	0.331578	0.948646
TCGA.RD.A7BS.01	EPHA7-MUT	0.216371	0.0568075	0	0.0757465	0	0.147795	0	0.119859	0.00472721	0	0.00531419	0.00270585	0.0179131	0.0700793	0.157032	0.0464224	0	0.0108714	0.0127559	0.0556001	0	0	0.01	0.338074	0.951394
TCGA.66.2788.01	EPHA7-WT	0.0129121	0	0.159263	0.111636	0	0.134537	0	0	0.0167236	0	0	0.0219664	0.00152897	0.0883452	0.126204	0.262413	0	0.0141867	0.00501286	0	0	0.0452712	0.01	0.330808	0.951367
TCGA.ZF.AA4W.01	EPHA7-WT	0	0.188584	0.0836969	0.0250706	0	0	0.0104802	0.0390241	0	0	0	0.171917	0.00983985	0.0956027	0.10689	0.0433402	0	0.125775	0.0806046	0	0.0133278	0.00584678	0.011	0.326208	0.957636
TCGA.ZP.A9D2.01	EPHA7-WT	0.141366	0	0.0938979	0.0519373	0	0.0959828	0	0.0404619	0	0	0	0.0274733	0.00901253	0.125635	0.0551037	0.321646	0	0	0.0346953	0	0	0.00278773	0.011	0.323779	0.952719
TCGA.43.8115.01	EPHA7-WT	0.0869529	0	0.0782325	0.118314	0	0.172988	0.00677316	0.0402773	0.0269175	0	0.0237735	0.0064152	0.0239434	0.0648828	0.0479337	0.273971	0.0089802	0.00180649	0.0007	0.017143	0	0	0.011	0.319391	0.951661
TCGA.IN.7806.01	EPHA7-WT	0.0717445	0.152023	0.0327625	0.0451215	0	0.103525	0	0.0919396	0.0203867	0	0	0.0602164	0.00483312	0.0986911	0.0132278	0.26612	0	0	0.0394093	0	0	0	0.011	0.322454	0.951079
TCGA.V1.A8MU.01	EPHA7-WT	0.0392118	0	0.175879	0.194798	0	0.122973	0	0.0820495	0.00248878	0	0	0.0745009	0.0101315	0.00162692	0.032388	0.143719	0.00698356	0	0.11325	0	0	0	0.011	0.321463	0.955995
TCGA.GM.A2DB.01	EPHA7-WT	0.09663	0.108617	0	0.0955164	0	0.0480885	0	0.112919	0.0160274	0	0	0.0197354	0	0.219223	0.108677	0.155068	0	0	0.0194978	0	0	0	0.011	0.322274	0.953851
TCGA.39.5035.01	EPHA7-WT	0	0.024932	0.14852	0.289529	0	0	0.00956657	0.0783377	0.0211135	0	0	0.0802292	0.00436528	0.0261983	0.0949658	0.204144	0.0007	0	0.0122689	0	0	0.00513627	0.011	0.324437	0.956461
TCGA.69.7761.01	EPHA7-WT	0	0.0413893	0.123132	0.142929	0	0.205559	0	0.018213	0.0343507	0	0	0.0193816	0.0048341	0.0681971	0.105248	0.163254	0.0249464	0	0.0344976	0	0	0.0140681	0.011	0.32188	0.951864
TCGA.A7.A26F.01	EPHA7-WT	0.155186	0	0.0648529	0.0734676	0	0.290336	0	0	0	0	0	0.044174	0.0392605	0.00210604	0.0148132	0.204956	0	0.0536884	0	0.0277948	0	0.029365	0.011	0.32	0.951882
TCGA.L5.A4OF.01	EPHA7-WT	0.157446	0	0.10519	0.0108951	0	0.37791	0	0.0225507	0	0	0.0644465	0	0.0189461	0	0.0210435	0.100766	0	0.07935	0	0.0414554	0	0	0.011	0.319157	0.956526
TCGA.D8.A1XD.01	EPHA7-WT	0.126588	0	0.117602	0.0402518	0	0.0910068	0	0.00427966	0.0546153	0	0.0145854	0.0232898	0.00555824	0.169937	0.0128428	0.267479	0	0	0.0719638	0	0	0	0.011	0.320496	0.954231
TCGA.T2.A6X0.01	EPHA7-WT	0.0563456	0	0.137172	0.204992	0	0.0349152	0.0043097	0.0817439	0.0293419	0	0.0189468	0	0.0004	0.0319756	0.21013	0.155381	0	0	0.0343748	0	0	0	0.011	0.319202	0.964916
TCGA.FD.A62O.01	EPHA7-WT	0.0446893	0.0375207	0.139232	0.0905666	0.0129679	0	0	0.116542	0.0289153	0	0.0132714	0	0.0460094	0.0479647	0	0.181266	0	0.0760662	0.0285943	0.08925	0	0.0471446	0.011	0.321153	0.950581
TCGA.CK.4950.01	EPHA7-WT	0.0221057	0.029014	0.145339	0.133063	0	0.140969	0	0.0973922	0.00579099	0	0	0.0516714	0	0.067251	0.0307897	0.237417	0	0	0.00638703	0.0100888	0.00458062	0.0181412	0.011	0.322478	0.952755
TCGA.22.4609.01	EPHA7-WT	0.0722529	0	0.085803	0.112045	0	0.166236	0.0313359	0.0124372	0	0	0.0160384	0.0275277	0	0.0826747	0.0489267	0.28628	0.00476649	0	0.041194	0	0	0.0124824	0.011	0.320099	0.950645
TCGA.CV.7100.01	EPHA7-WT	0	0.0103686	0.0001	0.217807	0	0.096456	0.00913617	0.0779087	0.0222676	0	0.0140196	0.0361465	0.0132025	0.0557173	0.220027	0.190889	0.0112572	0	0.0137312	0	0	0.0109571	0.011	0.320794	0.965972
TCGA.BT.A20X.01	EPHA7-WT	0	0.0113519	0.196263	0.160251	0	0	0.0342748	0.0573961	0.0127168	0	0.00369497	0.0336354	0.0233803	0.0528669	0.0796297	0.268163	0	0.0371486	0.0292273	0	0	0	0.011	0.323355	0.954035
TCGA.XX.A89A.01	EPHA7-WT	0.0910137	0	0.106206	0.0765794	0	0.265659	0	0.0323065	0.00962701	0	0	0.00529333	0.00707385	0.03418	0.0658818	0.279926	0	0	0.0239542	0	0	0.00229929	0.011	0.32038	0.952627
TCGA.J2.8194.01	EPHA7-WT	0.0926301	0	0.118422	0.0405917	0	0.160651	0	0.0374386	0	0	0.00546421	0	0.126177	0	0.0320236	0.298145	0.0209518	0.00433335	0	0.0345659	0	0.0286055	0.011	0.319271	0.952246
TCGA.DK.A1A7.01	EPHA7-MUT	0.289307	0	0.0291358	0.188968	0	0.178892	0	0.154657	0.0414875	0	0	0	0.0343677	0.0180299	0.010454	0.040628	0	0.00420232	0	0.00987051	0	0	0.011	0.324236	0.968648
TCGA.98.A53D.01	EPHA7-WT	0.0670151	0.102159	0.0277878	0.0911331	0	0.0847824	0	0.0473823	0.0248731	0	0.0182711	0.00512077	0.0157116	0.0118258	0.0075186	0.442765	0	0.0199364	0	0.0188353	0	0.0148829	0.011	0.320297	0.953421
TCGA.AC.A5XU.01	EPHA7-WT	0.0158726	0.0189982	0.139941	0.0850902	0	0.0693792	0	0.0412559	0.0407373	0	0	0.0113217	0	0.165182	0.0408326	0.319632	0	0	0.0509721	0	0	0.0008	0.011	0.323675	0.953342
TCGA.MN.A4N4.01	EPHA7-MUT	0.0520909	0	0.143809	0.0481974	0	0.0146621	0	0.029727	0.0164703	0	0	0.0164492	0	0.37253	0.0239761	0.236524	0	0	0.0455638	0	0	0	0.011	0.321941	0.968888
TCGA.39.5037.01	EPHA7-WT	0.0795895	0	0.14812	0.226222	0	0.0908595	0	0.0566379	0	0	0	0	0.0302539	0.061288	0.0231292	0.159676	0.0111385	0.0418587	0	0.0712262	0	0	0.011	0.323163	0.952729
TCGA.AO.A12A.01	EPHA7-WT	0.211271	0	0.0372939	0.158049	0	0.0347067	0	0.0647675	0.058316	0	0	0.074251	0.0103831	0.0009	0.0851341	0.199203	0.00827345	0	0.0574206	0	0	0	0.011	0.321549	0.953394
TCGA.37.4132.01	EPHA7-WT	0.00867724	0.0157715	0.146806	0.210627	0	0.0375041	0.00108714	0.121018	0.0104263	0.0130298	0	0.0761031	0.00454509	0.0295266	0.07735	0.221352	0.0018258	0	0	0.0215685	0	0.00278245	0.011	0.321537	0.955812
TCGA.ER.A2NF.01	EPHA7-WT	0.0198791	0.0183597	0.145459	0.218932	0	0.0979876	0	0.0837276	0.0990737	0	0	0.0659506	0.0157233	0.0228483	0.0518319	0.142442	0.0007	0	0.0170765	0	0	0	0.011	0.321845	0.957233
TCGA.E2.A1B5.01	EPHA7-WT	0.0388319	0.0772227	0.0455272	0.200663	0	0.0948853	0	0.112963	0.0925032	0.00864418	0	0.0310706	0.0137628	0.0101718	0.0977737	0.11599	0.0123833	0	0.0476076	0	0	0	0.011	0.323094	0.95346
TCGA.66.2769.01	EPHA7-WT	0.0940258	0	0.0958954	0.0413031	0	0.102468	0	0.0531248	0.00523769	0	0.0258565	0	0	0.265728	0.0378625	0.167574	0.037861	0	0	0.0689727	0	0.00409018	0.011	0.321893	0.955193
TCGA.78.8662.01	EPHA7-WT	0.00693449	0.0874666	0.130236	0.211188	0	0.0181856	0	0.15095	0.00457171	0	0	0.0292252	0.0246774	0.0511956	0.0364731	0.175666	0.0113637	0.00546276	0	0.0550994	0	0.00130443	0.011	0.326696	0.950911
TCGA.93.7347.01	EPHA7-WT	0.0863512	0	0.0741406	0.147116	0	0.0702919	0	0.0542225	0.0721381	0	0	0.00252873	0	0.122838	0.0448418	0.293594	0	0	0.0319375	0	0	0	0.011	0.32364	0.950502
TCGA.D3.A51K.06	EPHA7-WT	0	0.0836624	0.101127	0.261677	0	0	0.010094	0.131498	0.0756833	0	0	0.0391814	0.0408616	0	0.00850181	0.201064	0	0.00771031	0.0389387	0	0	0	0.011	0.323778	0.95262
TCGA.63.A5MT.01	EPHA7-WT	0.115804	0	0.0977356	0.0082604	0	0.0378602	0.00353272	0.0436213	0	0	0.0398206	0	0.00749209	0.247058	0.137038	0.216957	0	0.0221566	0.0182052	0	0	0.00445847	0.011	0.320529	0.96185
TCGA.64.1676.01	EPHA7-WT	0.101074	0	0.0928636	0.0931582	0	0.0284146	0.0152869	0.0458884	0.0106096	0	0	0.0303637	0.124408	0.00904245	0.0320831	0.355837	0.0362709	0	0.0246994	0	0	0	0.011	0.325978	0.949296
TCGA.CX.A4AQ.01	EPHA7-WT	0.244945	0	0	0.116077	0	0.111714	0	0.182106	0.0481216	0	0.00166255	0	0.0169239	0.0851205	0.057083	0.109821	0.0261381	0	0.0003	0	0	0	0.011	0.324503	0.95492
TCGA.N9.A4Q3.01	EPHA7-WT	0.107494	0	0.0863404	0.0939192	0	0	0	0.11921	0	0.0229922	0	0.0220649	0	0.30933	0.0382761	0.176731	0	0	0	0.0212833	0.00235941	0	0.011	0.323085	0.957543
TCGA.4T.AA8H.01	EPHA7-WT	0.00323589	0.0233253	0.190514	0.159753	0	0.196959	0	0.0002	0.0969366	0	0	0	0.0130936	0	0	0.17349	0.0794144	0.0133021	0	0.0497339	0	0	0.011	0.319564	0.95638
TCGA.98.A53I.01	EPHA7-WT	0.191379	0.0174706	0.0006	0.0849545	0	0.0872997	0	0.139536	0.0269794	0	0	0.0376277	0.00340748	0.0442746	0.0787404	0.249944	0.0207548	0	0.0170348	0	0	0	0.011	0.321099	0.952147
TCGA.CD.5804.01	EPHA7-WT	0.134082	0	0.102047	0.0822551	0	0.0641773	0.0146196	0.0160606	0.0257099	0	0.0376149	0	0.0294879	0.158985	0.0515076	0.256661	0	0	0	0.0196336	0	0.00715827	0.011	0.327348	0.950897
TCGA.GN.A4U3.06	EPHA7-WT	0.0981043	0	0.158904	0.1452	0	0	0	0.0510016	0	0	0	0.0630019	0.0349226	0	0.0186694	0.41014	0.00469002	0	0.0153665	0	0	0	0.011	0.323371	0.956621
TCGA.91.6829.01	EPHA7-WT	0.135418	0	0.0966553	0.0482798	0	0.0380838	0.00154419	0.00672798	0.0207511	0	0	0.0343795	0	0.118169	0.00484371	0.400448	0	0.0129464	0.0679355	0	0	0.0138183	0.011	0.322548	0.955705
TCGA.AO.A0J4.01	EPHA7-WT	0.150872	0	0.0643857	0.0791813	0	0.209844	0.0008	0.0966581	0.0400548	0	0.0132384	0	0.0185779	0.108965	0.131505	0.0817948	0.0040884	0	0	0	0	0	0.011	0.325353	0.954056
TCGA.64.1679.01	EPHA7-WT	0.11183	0	0.0912904	0.00863179	0	0.0408529	0.0006	0.0139287	0.0188944	0	0.0213936	0	0	0.224778	0.0233162	0.296686	0.100148	0	0	0.0409738	0	0.00662747	0.012	0.309013	0.966253
TCGA.G4.6320.01	EPHA7-WT	0.293967	0	0.0159642	0.0720522	0	0.174034	0	0.237067	0.00826437	0	0	0.0303943	0.00517205	0.0395929	0.025015	0.0639679	0.0206381	0	0.0138698	0	0	0	0.012	0.301933	0.974596
TCGA.56.A4BW.01	EPHA7-WT	0.0680846	0	0.118144	0.0815767	0	0.00613128	0	0.0894725	0.029767	0	0	0.0462088	0	0.170161	0.045774	0.21402	0	0.00561858	0.110837	0	0	0.0142053	0.012	0.303774	0.958626
TCGA.56.8308.01	EPHA7-WT	0.0734768	0	0.108436	0.0781157	0	0.164897	0	0.0497018	0.0362848	0	0.0300111	0	0	0.138769	0.0146418	0.216664	0.0026665	0.0103644	0	0.0759719	0	0	0.012	0.312517	0.955743
TCGA.B6.A0X7.01	EPHA7-WT	0.10183	0	0.104295	0.0696351	0	0.0643494	0	0.0406074	0	0	0	0.0369362	0.00237448	0.0008	0.0866295	0.230029	0.0129621	0	0.249521	0	0	0	0.012	0.304938	0.959064
TCGA.05.4398.01	EPHA7-WT	0.0657714	0	0.116894	0.0549682	0	0.130819	0	0.0594175	0.0138898	0	0.0223952	0.00413522	0.0616093	0	0.07385	0.303942	0.0277488	0	0	0.0576939	0	0.00686601	0.012	0.308881	0.955912
TCGA.D7.8575.01	EPHA7-WT	0.0918924	0	0.133523	0.023858	0	0.0530462	0	0.0388841	0.0252666	0	0.0026432	0	0	0.282491	0.00456825	0.243037	0	0.0135063	0	0.0872846	0	0	0.012	0.312552	0.967737
TCGA.G8.6325.01	EPHA7-WT	0	0.124565	0	0.161614	0	0	0.106518	0.0699333	0.0228693	0	0	0.0160958	0	0.340259	0.0661147	0.0620331	0	0	0.0262404	0	0	0.00375776	0.012	0.302803	0.963859
TCGA.24.2288.01	EPHA7-WT	0.0558256	0.0609108	0.0760239	0.151581	0	0.0603503	0	0.156923	0.015614	0	0	0.0598826	0.0281911	0	0.0841804	0.195649	0	0.0391796	0	0.014253	0	0.0014355	0.012	0.304105	0.960686
TCGA.CD.8533.01	EPHA7-WT	0.0973298	0	0.127199	0.0585928	0	0.177321	0.0694722	0.0597483	0.0201501	0	0	0.0128137	0.00779089	0	0.0335277	0.228557	0.0401992	0	0.0672983	0	0	0	0.012	0.316482	0.952158
TCGA.57.1994.01	EPHA7-WT	0.0765467	0	0.118844	0.142617	0	0.125557	0	0.0733196	0.059155	0	0	0.0420501	0.00680629	0.0934669	0.0391585	0.204053	0	0	0	0.0183366	0	0.0001	0.012	0.308171	0.958864
TCGA.L4.A4E6.01	EPHA7-WT	0.0479673	0	0.0304351	0.0469923	0	0.0997404	0	0.027405	0.015222	0	0.0346905	0.00730821	0.0264178	0.0965082	0.0204746	0.499163	0.00750413	0	0.0335387	0	0	0.00663309	0.012	0.313219	0.961072
TCGA.BB.7866.01	EPHA7-WT	0.129285	0	0.0694731	0.113515	0	0.0692217	0	0.105799	0.0193181	0	0	0.00963956	0.00595925	0.0199914	0.147799	0.280859	0.017765	0	0.0113748	0	0	0	0.012	0.314484	0.957929
TCGA.AD.6888.01	EPHA7-WT	0.0003	0.114852	0.107225	0.0933038	0	0.12328	0.00817528	0	0.0417068	0	0.0465842	0	0.0246384	0.127168	0.0183703	0.12607	0.0333402	0.0547468	0	0.0801985	0	0	0.012	0.315414	0.952803
TCGA.18.3410.01	EPHA7-WT	0.0923739	0	0.0995759	0.195321	0	0.164517	0.054725	0.0240393	0.014081	0	0	0.0264515	0.0160282	0.0706336	0.0968854	0.118952	0	0	0.0250757	0	0	0.00134032	0.012	0.309227	0.958902
TCGA.VQ.A91V.01	EPHA7-WT	0.142878	0	0.0928072	0.142036	0	0.168169	0	0.0329874	0.0128061	0	0.0599119	0	0.0428812	0	0.0239296	0.189941	0	0.0254152	0.00941893	0.0375073	0	0.0193107	0.012	0.310146	0.957046
TCGA.44.3917.01	EPHA7-WT	0.0691391	0	0.120152	0.0580626	0	0.162412	0.0742829	0.0199331	0	0	0	0.0532513	0.00388054	0	0.0516227	0.330093	0	0.012614	0.0212764	0	0	0.0232796	0.012	0.312399	0.954464
TCGA.LL.A5YO.01	EPHA7-WT	0.0729392	0.0831609	0.0195441	0.167576	0	0.0753344	0	0.135164	0.0478625	0	0.00496191	0	0.00130357	0.153186	0.0912665	0.125108	0.00456807	0	0.0180246	0	0	0	0.012	0.316156	0.955367
TCGA.J4.A67L.01	EPHA7-WT	0.108482	0	0.113968	0.238954	0	0.0317245	0	0.0964652	0.0381129	0	0	0.0466778	0.018547	0.00220456	0.0420628	0.204086	0.0067179	0	0.0519978	0	0	0	0.012	0.308033	0.959857
TCGA.13.0720.01	EPHA7-WT	0	0.0966148	0.125676	0.0612739	0	0.174506	0	0.122759	0.0009	0	0	0.0754367	0.0274966	0.149643	0.0107297	0.0405459	0	0.113044	0	0.00141564	0	0	0.012	0.313012	0.957541
TCGA.A2.A0SY.01	EPHA7-WT	0.142243	0	0.038259	0.105084	0	0.180088	0	0.097476	0.00591866	0	0	0.0361703	0.0336268	0.0144124	0.0551172	0.176089	0.0170086	0	0.0985075	0	0	0	0.012	0.304829	0.956572
TCGA.CN.A6V3.01	EPHA7-WT	0.0447811	0	0.126641	0.116645	0	0.0599315	0.0481573	0.0324361	0.0121416	0	0.0330684	0	0	0.104155	0.187888	0.0805285	0.00711296	0.0415243	0	0.0972215	0	0.00776755	0.012	0.306215	0.968253
TCGA.58.8391.01	EPHA7-WT	0.112569	0	0.0951053	0.0868999	0	0.0385465	0	0.0875031	0.0122012	0	0	0.0228277	0.0266248	0.186119	0.0367367	0.229682	0	0	0	0.0460953	0	0.0190908	0.012	0.304787	0.960864
TCGA.BH.A1FE.01	EPHA7-WT	0.112721	0	0.0625457	0.157665	0	0.245357	0	0.00804421	0.00712972	0.0493977	0	0.00477572	0	0	0.113181	0.100838	0.0350832	0.00306568	0.100197	0	0	0	0.012	0.316516	0.956087
TCGA.E9.A3X8.01	EPHA7-WT	0.0308678	0	0.139207	0.374784	0	0	0	0.0953536	0.083322	0	0	0.0529112	0.008556	0.00895145	0.051923	0.0861133	0.00469188	0	0.063319	0	0	0	0.012	0.307032	0.96987
TCGA.2E.A9G8.01	EPHA7-WT	0	0.0844104	0.107485	0.176613	0	0.0241377	0	0.216795	0.0304894	0	0	0.0666791	0.0193626	0.0515296	0.0633185	0.0864796	0	0.0009	0.0717795	0	0	0	0.012	0.309844	0.959523
TCGA.63.A5MN.01	EPHA7-WT	0	0.0108164	0.135424	0.15005	0	0.149366	0	0.0422523	0.0156829	0	0	0.0186955	0.010209	0.0102488	0.12751	0.285622	0.00429089	0.00280618	0.0346705	0	0	0.0023555	0.012	0.305103	0.961258
TCGA.L5.A8NS.01	EPHA7-WT	0.147131	0	0.0651417	0.149571	0	0.248356	0	0.0961655	0.0228628	0	0	0.01807	0.0198042	0.00750477	0.0671489	0.107083	0	0.00576595	0.00479652	0.0385349	0	0.00206368	0.012	0.305456	0.964303
TCGA.NJ.A55O.01	EPHA7-WT	0.155668	0	0.0457429	0.0488759	0	0.185365	0	0.0438671	0.0153105	0	0.0218656	0	0.0192905	0	0.00765435	0.416828	0	0.0218808	0.00649539	0.00439047	0	0.00676507	0.012	0.311712	0.957179
TCGA.75.6211.01	EPHA7-WT	0.0373139	0	0.138438	0.13844	0	0.124021	0.0303991	0.109226	0.0716653	0	0.00129681	0.019236	0.010759	0.0844444	0.0178489	0.180189	0.0106018	0	0.0219878	0	0	0.00413335	0.012	0.304602	0.960408
TCGA.21.5782.01	EPHA7-WT	0	0.0261497	0.145214	0.0999928	0	0.0194569	0	0.1204	0.0137449	0	0	0.0377764	0	0.236257	0.0479639	0.226249	0	0	0.0267956	0	0	0	0.012	0.302957	0.964666
TCGA.97.A4M2.01	EPHA7-WT	0.0853321	0	0.071906	0.126595	0	0.113574	0	0.0566136	0.0242284	0	0.00144905	0.0439353	0.0615021	0.098074	0.0253222	0.184256	0.0131457	0.00726665	0.0867991	0	0	0	0.012	0.3115	0.952631
TCGA.CV.7435.01	EPHA7-WT	0.0367961	0	0.10366	0.0386464	0	0.113356	0.00709136	0.00180247	0.0196249	0	0.0382889	0	0	0.226963	0.0603577	0.32129	0	0.00378536	0.0283381	0	0	0	0.012	0.306079	0.964265
TCGA.AO.A1KQ.01	EPHA7-WT	0.0792708	0	0.0860282	0.228861	0	0.0741507	0	0.122252	0.00601583	0	0	0.0423877	0.00127205	0.0997589	0.0646997	0.175948	0	0	0.0193555	0	0	0	0.012	0.314265	0.956836
TCGA.60.2704.01	EPHA7-WT	0.0660347	0	0.104333	0.0341849	0	0.161144	0.0513655	0	0	0	0.0253121	0	0.0129376	0.0779878	0.0396467	0.39403	0	0	0.00864626	0.0100509	0	0.0143261	0.012	0.317443	0.954449
TCGA.66.2800.01	EPHA7-WT	0.0707114	0	0.0982084	0.0376127	0	0.146909	0	0	0	0	0.00356669	0.00339429	0.0347613	0.0754475	0.0265133	0.398717	0.0493767	0	0.00522158	0.0186059	0	0.0309549	0.012	0.304534	0.961932
TCGA.EB.A24D.01	EPHA7-MUT	0.0385213	0	0.187031	0.13179	0	0.254327	0	0.112892	0.00451427	0	0	0.0495076	0.0188824	0.00934544	0.0611421	0.103111	0.00781254	0	0.0211227	0	0	0	0.012	0.307684	0.967976
TCGA.CQ.6223.01	EPHA7-WT	0.173985	0	0.0616407	0.0847321	0	0.0628675	0.0262509	0.0530867	0	0	0.0968236	0	0.0465414	0.131023	0.0623867	0.110345	0.0005	0.0751071	0.0006	0.0140764	0	0	0.012	0.318755	0.952906
TCGA.EB.A5UL.06	EPHA7-WT	0.0537088	0.087545	0.0653412	0.284511	0	0	0.00605845	0.15627	0.0375931	0	0	0.0892388	0.0107647	0.0281636	0.0850874	0.0957188	0	0	0	0	0	0	0.012	0.305553	0.96929
TCGA.FF.8042.01	EPHA7-MUT	0.164265	0.0721988	0.0175965	0.137574	0	0	0.0162534	0.0754418	0.0239637	0	0.013034	0.0088381	0	0.390115	0.0361901	0.0294713	0	0	0.0150583	0	0	0	0.012	0.314051	0.965912
TCGA.LD.A7W6.01	EPHA7-WT	0.119581	0	0.0883264	0.163263	0	0.16379	0	0.100944	0.0131991	0	0	0.0467646	0.0129335	0	0.052555	0.150143	0.00230522	0	0.0861954	0	0	0	0.012	0.316467	0.955266
TCGA.05.5425.01	EPHA7-WT	0.0982038	0	0.0717384	0.13948	0	0.124942	0.0132124	0.0409496	0.0196482	0	0	0.0394065	0.00123163	0.0536906	0.128878	0.204897	0.0135027	0.0074477	0.0245654	0	0	0.0182068	0.012	0.307559	0.958464
TCGA.77.8139.01	EPHA7-WT	0.0104268	0.0235563	0.133834	0.06457	0	0.17526	0	0.0857155	0.0503787	0	0.0279178	0.0245014	0.00717407	0.163417	0.0395107	0.18268	0	0	0	0.0074144	0	0.00364232	0.012	0.301957	0.9618
TCGA.D8.A1JH.01	EPHA7-WT	0.0994989	0	0.0736999	0.0489323	0	0.131453	0	0.0127497	0.0152303	0.00280591	0	0.0429689	0.00694807	0	0.037503	0.334629	0.0905454	0	0.101189	0	0	0.0018472	0.012	0.307213	0.95495
TCGA.CV.6953.01	EPHA7-WT	0	0.00921278	0.18029	0.152055	0	0.0687232	0.0136765	0.0887748	0.0404146	0	0	0.00927081	0.00687142	0.123614	0.0462652	0.226203	0	0.0183162	0	0.00606816	0	0.0102445	0.012	0.316313	0.957115
TCGA.CV.A6JO.01	EPHA7-WT	0	0.0117121	0.00391847	0.266156	0	0	0	0.10308	0.0281828	0	0	0.0891499	0.0036973	0.0221524	0.28158	0.172532	0.00538583	0	0.00976161	0	0	0.00269159	0.012	0.315124	0.987632
TCGA.66.2782.01	EPHA7-WT	0.0869201	0	0.0883265	0.0649746	0	0.131819	0.00522378	0.0348089	0.0173033	0	0	0.0205132	0.0142847	0	0.0632334	0.387733	0.00662419	0	0.0110536	0	0	0.0671815	0.012	0.314352	0.954875
TCGA.G9.6351.01	EPHA7-WT	0.0724599	0	0.168634	0.211731	0	0.100337	0	0.100146	0	0	0	0.0952854	0.0164291	0	0.0217943	0.131018	0	0	0.0821652	0	0	0	0.012	0.311865	0.963926
TCGA.04.1655.01	EPHA7-WT	0	0.228454	0.04323	0.201323	0	0.0372663	0	0.127873	0	0	0	0.141898	0.0743266	0	0	0.103175	0	0	0.036321	0	0.00613263	0	0.012	0.317096	0.961106
TCGA.EJ.7783.01	EPHA7-WT	0.0725151	0	0.152193	0.21634	0	0.144835	0	0.0608423	0	0	0	0.0994298	0.0886461	0.0092225	0.0179028	0.0695086	0	0.00553214	0.0630316	0	0	0	0.012	0.301881	0.967853
TCGA.A7.A13H.01	EPHA7-WT	0.0891489	0	0.089919	0.0682124	0	0.0856276	0	0.0221121	0.0221736	0	0	0.0154547	0.0198338	0.33049	0.0701709	0.133199	0	0	0.0536587	0	0	0	0.012	0.308236	0.963609
TCGA.V1.A9OT.01	EPHA7-MUT	0	0.0826056	0.139446	0.293898	0	0.00175267	0	0.131501	0.035379	0	0	0.0648952	0.0150355	0	0.0131473	0.135964	0.0002	0	0.0862022	0	0	0	0.012	0.306246	0.965518
TCGA.D8.A1JB.01	EPHA7-WT	0.0597753	0.0947307	0.0243497	0.250349	0	0.065261	0	0.130513	0.0101404	0.0554826	0	0.0646742	0	0	0.0578224	0.124561	0.00178433	0	0.0605567	0	0	0	0.012	0.305223	0.965987
TCGA.BH.A1FC.01	EPHA7-WT	0.00410605	0.0004	0.180865	0.253156	0	0	0.068838	0.0805564	0.0619565	0	0	0.13552	0.0141035	0.00357534	0.0842394	0.0925443	0.00782096	0	0	0.0111113	0	0.00120126	0.012	0.31645	0.968607
TCGA.64.5778.01	EPHA7-WT	0.0527096	0.0060812	0.105021	0.232197	0	0.0222705	0.0398561	0.0792732	0.0298165	0.0204118	0	0.0789626	0	0.0307001	0.1304	0.129762	0.0133495	0	0.0291886	0	0	0	0.012	0.311157	0.962211
TCGA.85.8072.01	EPHA7-WT	0.0893308	0	0.0747015	0.125546	0	0.0546894	0	0.0396577	0.0563891	0	0.0244578	0.0675492	0.0333933	0.0396173	0.0223627	0.277028	0.0105993	0	0.080088	0	0	0.00458989	0.012	0.30411	0.95666
TCGA.AR.A24W.01	EPHA7-WT	0.112499	0	0.102294	0.0969751	0	0.10508	0	0.0343628	0.0009	0	0	0.0397278	0.00852052	0	0	0.241229	0.0162298	0.0250495	0.175063	0.0311233	0	0.0109918	0.012	0.309766	0.955446
TCGA.V1.A9O7.01	EPHA7-WT	0.151325	0	0.0959288	0.110759	0	0.0946497	0	0.0663776	0.00605229	0	0	0.123821	0.0396551	0.0144468	0.0289733	0.130917	0.0135917	0	0	0.123503	0	0	0.012	0.303803	0.965375
TCGA.A2.A0CK.01	EPHA7-WT	0.109877	0	0.0862259	0.115908	0	0.211733	0	0.0905918	0.00149099	0	0	0.0563108	0.00269024	0.00720263	0.0539017	0.234922	0	0	0.0290607	0	0	0.0001	0.012	0.304445	0.960441
TCGA.LT.A8JT.01	EPHA7-WT	0	0.0893715	0.126538	0.203836	0	0	0	0.205303	0.0247003	0	0.00374009	0	0.0225947	0	0.0585461	0.180434	0	0.0725111	0	0.0124252	0	0	0.012	0.308399	0.960983
TCGA.NC.A5HN.01	EPHA7-WT	0	0.0331312	0.163671	0.189008	0	0.0251634	0	0.130921	0	0	0	0.0590382	0	0.0615014	0.125451	0.152702	0	0.0370168	0.0223967	0	0	0	0.012	0.315137	0.960793
TCGA.GF.A4EO.06	EPHA7-WT	0	0.0854961	0.0714672	0.224355	0	0.0592526	0.0300923	0.0564162	0.0443286	0	0	0.0447466	0.00524374	0.0826287	0.0866221	0.179137	0	0	0.0302138	0	0	0	0.012	0.314092	0.954929
TCGA.49.AARQ.01	EPHA7-MUT	0.00318249	0.0139545	0.183164	0.153961	0	0	0	0.189662	0	0	0.00743738	0.0152511	0.0159946	0.0754065	0.186695	0.129963	0	0	0.0253281	0	0	0	0.012	0.314051	0.966967
TCGA.38.6178.01	EPHA7-WT	0.00496558	0.0508504	0.114385	0.0507067	0	0.177896	0	0.00323591	0.0110581	0	0	0.0451032	0.0199693	0	0.0335717	0.378851	0	0.0309245	0.0738756	0	0	0.00460765	0.012	0.301797	0.958775
TCGA.BR.8380.01	EPHA7-WT	0.140225	0	0.0701544	0.0766035	0	0.126902	0	0.0561221	0.0176828	0	0	0.0524224	0.0388762	0.0421877	0.0285239	0.264283	0.00585574	0	0.0801617	0	0	0	0.012	0.306042	0.955966
TCGA.59.2352.01	EPHA7-WT	0.0240607	0.0360817	0.138681	0.0895367	0	0.0370885	0	0.105409	0.0442873	0	0	0.0733432	0.0130206	0.123258	0.118355	0.170002	0	0.0268764	0	0	0	0	0.012	0.313579	0.958832
TCGA.MP.A4T9.01	EPHA7-WT	0.131422	0	0.0544332	0.0795435	0	0.121553	0	0.0535148	0.0207451	0	0.0228069	0.0305722	0.0458368	0.0373901	0.0217594	0.279394	0	0.00940104	0.0834543	0	0	0.00817322	0.012	0.309204	0.953915
TCGA.NC.A5HH.01	EPHA7-WT	0.0112085	0	0.18499	0.162913	0	0.0340613	0	0.210786	0	0.0097172	0	0.0512814	0.0135361	0.0223636	0.117442	0.153206	0.0120222	0	0	0.0164731	0	0	0.012	0.306739	0.967047
TCGA.GD.A2C5.01	EPHA7-WT	0	0.153403	0.0764786	0.0352587	0	0.0312758	0	0.0476396	0.00149027	0	0.0217691	0	0.0354694	0	0	0.335662	0.0489916	0.105229	0.0848662	0	0	0.0224668	0.012	0.314971	0.952847
TCGA.GU.AATO.01	EPHA7-WT	0.00940187	0.00511016	0.157421	0.196748	0	0	0	0.0489484	0.0225061	0	0	0.0708585	0.0278575	0.0355609	0.0819667	0.202211	0.0210203	0	0.108433	0	0	0.011957	0.012	0.316881	0.953495
TCGA.AC.A2BK.01	EPHA7-WT	0.178097	0	0.0730598	0.194457	0	0	0.0330609	0.0906554	0	0	0	0.0380719	0	0	0.0844904	0.259406	0.0233087	0.0164025	0.00898985	0	0	0	0.012	0.307458	0.960224
TCGA.N9.A4Q8.01	EPHA7-WT	0.103921	0	0.176992	0.0643882	0	0.0257132	0	0.0516657	0.00992962	0	0	0	0	0.293598	0.0106706	0.236321	0.00557398	0.0008	0	0.0204662	0	0	0.012	0.315771	0.971132
TCGA.E9.A1QZ.01	EPHA7-WT	0.0485669	0.139694	0	0.179377	0	0.222463	0	0.076552	0.0110643	0	0	0.0441259	0.0087624	0.00437396	0.0857991	0.108645	0.00561808	0	0.0649584	0	0	0	0.012	0.311033	0.960063
TCGA.43.7656.01	EPHA7-WT	0.10887	0.0276513	0.0599804	0.169486	0	0.112143	0.00635338	0.107791	0.0119811	0	0	0.0035003	0.00200109	0.0330757	0.175233	0.17033	0	0	0.0116041	0	0	0	0.012	0.310514	0.963945
TCGA.44.A47G.01	EPHA7-WT	0.017974	0.0609605	0.0867804	0.139138	0	0.214251	0.00798708	0.0159924	0.0105257	0	0	0.00583279	0.0224401	0.0152398	0.0786286	0.26153	0.019524	0.00365741	0.0391686	0	0	0.0004	0.012	0.315288	0.953111
TCGA.J4.A83I.01	EPHA7-WT	0.112404	0	0.130249	0.130401	0	0.142501	0	0.0608524	0	0	0.0120758	0.0245167	0.0332476	0.00392685	0.124796	0.15524	0.0235894	0	0.0462004	0	0	0	0.012	0.313852	0.958077
TCGA.93.A4JO.01	EPHA7-WT	0.114702	0	0.0600432	0.10279	0	0.187086	0	0.0389994	0.0390331	0	0.0399732	0.00103173	0.00806985	0.0710619	0.0527363	0.264712	0.00667446	0	0.0130874	0	0	0	0.012	0.314167	0.954205
TCGA.04.1347.01	EPHA7-WT	0.110473	0	0.147633	0.0383154	0	0.0613784	0	0.119895	0	0	0	0.0344369	0.0289608	0.140226	0.0261527	0.272379	0	0.00791627	0.0122342	0	0	0	0.012	0.318727	0.956837
TCGA.CV.6441.01	EPHA7-WT	0	0.0873087	0.0083405	0.0846479	0	0	0	0.102191	0	0	0.0487834	0.00557239	0.0696139	0	0.100656	0.163908	0	0.254454	0.0745242	0	0	0	0.012	0.316746	0.95876
TCGA.VQ.AA6I.01	EPHA7-WT	0.100344	0	0.106736	0.090516	0	0.24203	0	0.0984629	0.0402853	0	0	0.0345988	0	0.0207222	0.030862	0.165556	0.0513828	0	0.0185042	0	0	0	0.012	0.318819	0.954537
TCGA.34.8456.01	EPHA7-WT	0.054052	0	0.146694	0.0668064	0	0.16331	0	0	0.00739	0	0.0081558	0.00483941	0.00589242	0.280541	0.0172084	0.226869	0	0	0.0182417	0	0	0	0.012	0.308033	0.966548
TCGA.55.8089.01	EPHA7-WT	0.101352	0	0.0697525	0.15734	0	0.0817166	0.00663901	0.0544107	0	0	0	0.107245	0.0268477	0.0268138	0.137267	0.158752	0.0148784	0	0.0569856	0	0	0	0.012	0.317423	0.956193
TCGA.CR.7371.01	EPHA7-WT	0.0804771	0	0.0940517	0.0910937	0	0.244151	0.0162657	0.00276745	0.00907433	0	0.0322354	0	0.0123406	0.127905	0.0652516	0.123755	0	0.0242535	0	0.0235474	0	0.0528306	0.012	0.308079	0.95686
TCGA.97.7547.01	EPHA7-WT	0.097345	0	0.0796112	0.0678059	0	0.12015	0	0.0401494	0.0528169	0	0	0.00834916	0.0713938	0.0108629	0.0360865	0.3508	0	0	0.0646295	0	0	0	0.012	0.307885	0.955594
TCGA.EB.A553.01	EPHA7-WT	0.119429	0	0.0894393	0.19278	0	0	0.00196205	0.0949638	0.0268328	0	0.0275203	0.0182758	0.0265146	0.176548	0.0555595	0.144455	0	0	0.0257187	0	0	0	0.012	0.30792	0.958592
TCGA.FD.A3SJ.01	EPHA7-WT	0.225251	0	0.0202202	0.0674594	0.00370786	0	0	0.151901	0	0	0	0.0282387	0.0345759	0.0277487	0.0456188	0.265497	0.0277386	0	0.102043	0	0	0	0.012	0.310783	0.955137
TCGA.CL.4957.01	EPHA7-WT	0.164189	0	0.0693613	0.0858247	0	0.121584	0.0518533	0.074104	0.0208827	0	0	0.035844	0.00876913	0.107279	0.0009	0.198274	0	0.0436005	0.0175397	0	0	0	0.012	0.308199	0.956826
TCGA.22.5473.01	EPHA7-WT	0.134411	0	0.0619125	0.0739025	0	0.126992	0.0168764	0.0203366	0	0	0.0262667	0.0342695	0	0.114356	0.0402028	0.322065	0	0	0.0109861	0.0174234	0	0	0.012	0.306675	0.958885
TCGA.A2.A04P.01	EPHA7-WT	0.0805351	0.0839876	0.0454114	0.0654841	0	0.0624058	0	0.212941	0.0248367	0.0168231	0	0	0	0.0353342	0.118263	0.191953	0	0.0450265	0.0169987	0	0	0	0.012	0.316259	0.956115
TCGA.BT.A20Q.01	EPHA7-WT	0.0165383	0	0.152569	0.143129	0	0.128607	0.00994738	0.110002	0.0238791	0	0	0.0327052	0.0360069	0	0.0771399	0.210889	0.0372486	0.0114421	0	0.00989574	0	0	0.012	0.307801	0.959054
TCGA.GS.A9TY.01	EPHA7-WT	0.0210108	0.316355	0.0451465	0.0769412	0.0234064	0	0.0881369	0.099178	0.00292593	0	0.026232	0	0.0006	0.0949911	0.0242304	0.165864	0	0	0.0149336	0	0	0	0.012	0.319035	0.957183
TCGA.86.6851.01	EPHA7-WT	0.0006	0.0338555	0.106362	0.170861	0	0.05962	0.0002	0.101345	0.069564	0	0	0.0554752	0.00665903	0.0248533	0.0932497	0.249278	0.00468549	0	0.023378	0	0	0	0.012	0.303307	0.960548
TCGA.FP.8211.01	EPHA7-WT	0.170198	0	0.0706536	0.168764	0	0.265251	0	0.0589738	0.0359316	0	0	0.0466872	0.0205675	0.00208789	0.0233307	0.0832349	0	0.0128322	0	0.0414877	0	0	0.012	0.309041	0.966404
TCGA.EJ.AB27.01	EPHA7-WT	0.130358	0.0697228	0.0648823	0.0666419	0	0.215956	0	0.187002	0.0308155	0	0	0.0360149	0.0143342	0.0343553	0.0509018	0.0289252	0	0.0100062	0.0600838	0	0	0	0.012	0.313668	0.961901
TCGA.AA.3495.01	EPHA7-WT	0.0139213	0.00433933	0.170972	0.131296	0	0.113896	0	0.0979772	0.0561439	0	0	0.0341215	0.00730041	0.0504519	0.0576404	0.244266	0	0	0.00526004	0.0063875	0	0.006027	0.012	0.315399	0.957102
TCGA.GN.A26D.06	EPHA7-WT	0.182907	0	0.0641069	0.107177	0	0.017087	0	0.0794768	0.0237046	0	0	0.042901	0	0.0882561	0.0482321	0.346152	0	0	0	0	0	0	0.012	0.304226	0.962778
TCGA.PE.A5DE.01	EPHA7-WT	0.0783246	0	0.082893	0.231344	0	0.129687	0	0.11134	0.0263193	0	0	0.0668917	0.0243672	0.0213944	0.112038	0.0892866	0.011575	0	0.014539	0	0	0	0.012	0.305177	0.966744
TCGA.GV.A3JV.01	EPHA7-WT	0.127348	0	0.094183	0.159923	0	0.0552711	0	0.188904	0.0147845	0	0	0.0323814	0.002831	0	0.0810304	0.17775	0.0266165	0	0.0389775	0	0	0	0.012	0.317009	0.955839
TCGA.KK.A8IL.01	EPHA7-WT	0.0944653	0	0.122766	0.207829	0	0.107627	0	0.0646017	0.0004	0	0	0.0488779	0.0281384	0.0306873	0.105682	0.140952	0.00987422	0.0104426	0.0276318	0	0	0	0.012	0.313941	0.958731
TCGA.CV.5977.01	EPHA7-WT	0	0	0.0236315	0.0311051	0	0.188082	0	0.0191469	0	0	0	0.0723853	0	0.148617	0.243332	0.126079	0.0169307	0.0454015	0	0.0852883	0	0	0.012	0.312254	0.978311
TCGA.DM.A28G.01	EPHA7-WT	0	0.0158901	0.169764	0.21687	0	0.109695	0.0280207	0	0.0367198	0	0.0660815	0	0.0398271	0.0822788	0.0193292	0.118178	0.00746391	0	0	0.0898811	0	0	0.012	0.307164	0.961309
TCGA.5M.AATE.01	EPHA7-WT	0.0496912	0.0196328	0.143965	0.11321	0	0.0989708	0.00629436	0.0570572	0.023417	0	0.0305626	0	0.0160651	0.138062	0.0188018	0.180597	0.0259295	0.0009	0	0.0768596	0	0	0.012	0.314693	0.95556
TCGA.CV.7254.01	EPHA7-WT	0.135909	0	0.0378606	0.0551183	0	0.0720134	0.00456728	0.0787336	0.00317811	0.00784031	0	0.0120118	0	0.134167	0.0578334	0.372089	0.0042747	0	0.0243889	0	0	0	0.012	0.309496	0.959457
TCGA.B6.A0WX.01	EPHA7-WT	0.105132	0.0383826	0.0652328	0.117438	0	0.193014	0	0.117288	0.0228859	0.0166375	0	0.0200934	0	0.0005	0.0943443	0.184656	0.00909465	0	0.0153382	0	0	0	0.012	0.31549	0.95727
TCGA.YL.A8SK.01	EPHA7-WT	0.106371	0	0.124351	0.20999	0	0.102431	0	0.0514233	0	0	0	0.0292323	0.0227033	0	0.0588201	0.158998	0	0	0	0.13568	0	0	0.012	0.313229	0.95946
TCGA.KC.A4BL.01	EPHA7-WT	0.0522099	0.0363518	0.126325	0.133176	0	0.18389	0	0.097079	0.0003	0	0	0.0474713	0.00959425	0	0.0541303	0.152752	0.0258244	0	0.0741938	0.0067136	0	0	0.012	0.314772	0.955519
TCGA.85.A510.01	EPHA7-WT	0.109239	0	0.083265	0.150725	0	0.0499549	0.00597081	0.12443	0	0	0	0.127758	0.0240976	0	0.0656607	0.208851	0.00578454	0	0	0.0442635	0	0	0.012	0.310554	0.960117
TCGA.BR.6707.01	EPHA7-WT	0.0939762	0	0.0680007	0.305977	0	0	0.0444315	0.107532	0.0414416	0	0	0.0654887	0	0.0321132	0.0563153	0.179338	0	0	0	0.00538601	0	0	0.012	0.302632	0.965595
TCGA.55.8094.01	EPHA7-WT	0.0743028	0.00554737	0.142332	0.166124	0	0	0	0.0383673	0.00671672	0	0	0	0.0167723	0.15667	0	0.0708915	0	0.147907	0.163452	0	0	0.0109155	0.012	0.318229	0.953609
TCGA.E2.A1IU.01	EPHA7-WT	0.0880732	0.0406417	0.0671891	0.131607	0	0.0819568	0	0.0929411	0.00792814	0	0	0.0484804	0	0	0.0606692	0.264607	0.00861025	0	0.101097	0	0	0.00619971	0.012	0.31504	0.952294
TCGA.HF.7134.01	EPHA7-WT	0.0483348	0	0.146642	0.0630176	0	0.108318	0	0.0369517	0.0868831	0	0.0431324	0	0.0220691	0.102372	0.00793252	0.178391	0	0.0131917	0	0.113103	0	0.0296614	0.012	0.302035	0.96018
TCGA.49.6761.01	EPHA7-WT	0.0739651	0	0.0996327	0.145643	0	0.0724405	0.0309855	0.071911	0.00457751	0	0	0.0651707	0.00642078	0.054401	0.105178	0.235221	0	0.0147744	0	0.0196784	0	0	0.012	0.302355	0.961494
TCGA.13.0725.01	EPHA7-WT	0.0552256	0.0391044	0.093053	0.0912572	0	0.119085	0	0.0590449	0.0600726	0	0	0	0.0227321	0	0.0291801	0.357595	0	0.00544891	0.0619465	0	0	0.00625459	0.012	0.304624	0.957634
TCGA.E2.A2P6.01	EPHA7-WT	0.0998371	0	0.0925546	0.0378193	0	0.0609442	0	0.0698976	0	0	0	0.0286368	0.00113889	0	0.0565689	0.421495	0	0	0.125826	0	0	0.00528149	0.013	0.295181	0.963461
TCGA.AY.A69D.01	EPHA7-WT	0.207198	0	0.0486907	0.045394	0	0.227295	0	0.113487	0	0	0.0220635	0.0129162	0.0135258	0.0420758	0.0246083	0.178068	0	0.0151073	0	0.0495694	0	0	0.013	0.299961	0.963074
TCGA.37.4133.01	EPHA7-WT	0.0322681	0	0.12837	0.145539	0	0.0978347	0.0007	0.108791	0	0	0.0240086	0.00844936	0.0184333	0	0.138652	0.256619	0.00571812	0.00961245	0	0.0140613	0	0.0109666	0.013	0.298696	0.965539
TCGA.AY.A8YK.01	EPHA7-WT	0.0651093	0.0494531	0.0960647	0.0492025	0	0.154378	0.00324801	0.0141635	0.0327702	0	0.0992454	0	0.035044	0.0738428	0.00132649	0.228822	0	0.0456845	0	0.051645	0	0	0.013	0.30072	0.959095
TCGA.XK.AAJT.01	EPHA7-WT	0.0156094	0.0184983	0.165665	0.122987	0	0.128195	0	0.135238	0	0	0	0.0595056	0.0282805	0	0.0601562	0.199118	0.0006	0.001	0.0652309	0	0	0	0.013	0.290237	0.967535
TCGA.60.2710.01	EPHA7-WT	0.100267	0	0.0596732	0.0718157	0	0.0866641	0.0002	0.0145013	0.0250667	0	0.00946011	0.00850021	0	0.19807	0.0685738	0.303152	0	0	0.0515219	0	0	0.00251686	0.013	0.288077	0.969175
TCGA.ZF.AA56.01	EPHA7-WT	0	0.119666	0.066672	0.0750595	0	0.111045	0.00387442	0.108645	0.00654458	0	0.0484	0	0.052663	0	0.0137663	0.313934	0	0.0270159	0.0114064	0.0235373	0	0.01777	0.013	0.300336	0.958319
TCGA.S3.AA14.01	EPHA7-WT	0.0776335	0	0.0984807	0.0903371	0	0.0881557	0	0.123218	0	0	0	0.056391	0.0183665	0.0021828	0.0562118	0.247858	0.0128715	0	0.128294	0	0	0	0.013	0.293619	0.960763
TCGA.L5.A8NJ.01	EPHA7-WT	0.0057967	0.0696315	0.134997	0.162948	0	0.0826329	0	0.092168	0.079192	0	0	0.0888527	0.0374842	0.0177481	0	0.105298	0	0.0901217	0.0331291	0	0	0	0.013	0.299959	0.964105
TCGA.GC.A4ZW.01	EPHA7-WT	0.0997615	0	0.116733	0.20082	0	0	0	0.123661	0.00457641	0	0	0.104288	0.0389845	0.104426	0.0187394	0.152877	0	0.00709498	0.0250127	0	0.00302373	0	0.013	0.295774	0.966232
TCGA.CA.5255.01	EPHA7-WT	0.178973	0	0.060176	0.121904	0	0.160433	0	0.0732545	0.0337131	0	0	0.00318021	0	0.0189803	0.073596	0.127942	0.0378698	0.0546072	0.0296916	0.0256788	0	0	0.013	0.288435	0.967208
TCGA.GS.A9TV.01	EPHA7-WT	0.0107116	0.0806727	0	0.175929	0	0	0.0827859	0.0724914	0.0362939	0.0497164	0	0.0215853	0	0.176364	0.11167	0.146825	0	0	0.034955	0	0	0	0.013	0.286937	0.967473
TCGA.CN.4733.01	EPHA7-WT	0	0.0473395	0.0891197	0.201348	0	0.095548	0.00961609	0.0807027	0.03839	0	0	0.0286089	0.00498574	0.0288672	0.119687	0.197573	0.0125021	0.00970209	0.0338495	0	0	0.00216044	0.013	0.294615	0.964859
TCGA.55.7727.01	EPHA7-WT	0.137505	0.0006	0.0455274	0.0694837	0	0.166434	0.0143565	0.0595433	0.0026755	0	0	0.0114761	0.00139193	0.0172508	0.0802873	0.321126	0.0132578	0.0001	0.0565984	0	0	0.00236486	0.013	0.297433	0.96047
TCGA.13.0768.01	EPHA7-WT	0.0436757	0	0.118519	0.273404	0	0.0165965	0	0.0721343	0.0915514	0	0	0.109428	0.02156	0	0.06966	0.171542	0.00467942	0	0.00725042	0	0	0	0.013	0.294667	0.97217
TCGA.AC.A62V.01	EPHA7-WT	0	0.0303944	0.00229422	0.0523162	0.0197996	0.00336759	0	0.0294301	0.00354245	0	0	0.0195472	0.0151504	0.248233	0.00735828	0.445636	0	0	0.122548	0	0	0.0004	0.013	0.289623	0.983997
TCGA.CV.A468.01	EPHA7-MUT	0.106133	0	0.061379	0.17526	0	0.164128	0.0230837	0.0866998	0.0704663	0	0	0.0141884	0.00365386	0.0198984	0.101131	0.128972	0.0177865	0.00481594	0.0195346	0	0	0.00286889	0.013	0.293342	0.967533
TCGA.61.2111.01	EPHA7-WT	0.148659	0	0.0642421	0.0630164	0	0.0686834	0	0.0211559	0.0392439	0	0	0.0561505	0.046963	0.01537	0.0120651	0.386678	0	0	0.0777729	0	0	0	0.013	0.286098	0.96683
TCGA.EY.A1GP.01	EPHA7-WT	0.0458978	0	0.123257	0.113008	0	0.0631444	0	0.146221	0.00681287	0	0	0.0949529	0.00468174	0	0.0175096	0.226591	0	0.038785	0.118267	0	0	0.0009	0.013	0.294103	0.962475
TCGA.55.6969.01	EPHA7-WT	0.00448149	0.0157574	0.124115	0.0936493	0	0.194521	0	0.062451	0.0280892	0.0137653	0	0.0305673	0	0.146835	0.0401896	0.233415	0	0	0	0.0121644	0	0	0.013	0.298824	0.963374
TCGA.V1.A8WV.01	EPHA7-WT	0.115619	0.00121597	0.114308	0.145214	0	0.203844	0	0.117291	0	0	0	0.0296395	0.0117159	0	0.069596	0.106782	0.0216217	0	0.0631526	0	0	0	0.013	0.296644	0.967088
TCGA.85.A4QQ.01	EPHA7-WT	0.10315	0	0.100403	0.0212305	0.00679836	0	0.0149121	0.0643417	0.0254608	0.00546755	0.0435142	0	0	0.368435	0	0.14189	0.0114561	0	0	0.0818179	0.0111222	0	0.013	0.292602	0.978812
TCGA.A8.A0AB.01	EPHA7-WT	0.132	0	0.0887157	0.0442253	0	0.00535603	0	0.0542032	0	0	0	0.0138679	0.0101402	0.0417936	0	0.355218	0.0213376	0.00942285	0.217547	0	0	0.00617183	0.013	0.287741	0.968962
TCGA.GR.A4D9.01	EPHA7-WT	0.14988	0.125761	0	0.159153	0	0	0.198915	0.013624	0	0	0	0.0414868	0.00872026	0	0.0819579	0.161493	0	0	0.0507117	0	0	0.00829724	0.013	0.29747	0.962657
TCGA.BR.8483.01	EPHA7-WT	0.100309	0	0.123349	0.067386	0	0.0421268	0	0.0617986	0.0318775	0	0.00848433	0.0106435	0	0.32228	0.101548	0.115516	0	0	0.0146824	0	0	0	0.013	0.289364	0.976922
TCGA.BR.A452.01	EPHA7-WT	0.16914	0	0.0486664	0.225111	0	0.126049	0	0.158717	0.0179927	0	0.0345439	0.00439817	0.0286613	0.0555567	0.0627846	0.0139814	0.0191336	0	0	0.0350061	0.0003	0	0.013	0.287217	0.976962
TCGA.DI.A2QY.01	EPHA7-WT	0	0.00794518	0.173531	0.236284	0	0	0	0.16986	0.00744849	0	0	0	0.051747	0.155293	0.0524655	0.0506955	0.00556473	0	0.0891646	0	0	0	0.013	0.28736	0.970207
TCGA.FJ.A3Z7.01	EPHA7-WT	0	0.0934015	0.112162	0.189307	0	0.0682211	0	0.09427	0	0	0.0219542	0	0.03579	0.0219111	0.0681276	0.148813	0	0.0338144	0	0.112228	0	0	0.013	0.297651	0.962717
TCGA.AF.6136.01	EPHA7-WT	0.156327	0	0.0579405	0.0911419	0	0.15278	0	0.0810188	0.0199184	0	0	0.0303378	0.0247947	0.0384936	0.0350508	0.13113	0.0965759	0	0.0844914	0	0	0	0.013	0.295038	0.959826
TCGA.P3.A6SW.01	EPHA7-MUT	0	0.047777	0.0955295	0.328392	0	0	0.0339809	0.100401	0.0268043	0	0	0.0305778	0.00724841	0.0463954	0.0816267	0.158278	0	0	0.0429888	0	0	0	0.013	0.289011	0.969469
TCGA.67.6217.01	EPHA7-WT	0	0.0688346	0.0828109	0.140671	0	0.140458	0	0.0249443	0.0370303	0	0	0.0239508	0.0216959	0	0.0484305	0.287754	0.0837553	0.00569948	0.0339653	0	0	0	0.013	0.294511	0.96047
TCGA.A6.6650.01	EPHA7-WT	0.099389	0	0.127322	0.079517	0	0.225713	0.0741398	0.047629	0	0	0.0153952	0	0.0374807	0.00273599	0.0486338	0.158389	0.00659985	0	0	0.0770563	0	0	0.013	0.297734	0.962252
TCGA.94.A4VJ.01	EPHA7-WT	0.0996256	0	0.0829298	0.0642322	0	0.0395594	0	0.107566	0.00508143	0	0	0.0464697	0.0005	0.196878	0.0613713	0.224719	0.0509987	0.0111814	0.00887245	0	0	0	0.013	0.294005	0.965373
TCGA.BA.A4IG.01	EPHA7-WT	0.11241	0.0862993	0.0166078	0.10406	0	0.155459	0	0.127691	0.00821835	0.0227687	0	0.0304074	0	0.0217381	0.131697	0.147016	0.00372245	0.00759987	0.0243049	0	0	0	0.013	0.288665	0.970829
TCGA.85.A5B5.01	EPHA7-WT	0.0866303	0.0175551	0.0774318	0.0687688	0	0.0755311	0	0.0183087	0.0323543	0	0	0.0310883	0	0.157757	0.096143	0.317405	0	0	0.0210261	0	0	0	0.013	0.288168	0.970047
TCGA.EE.A29H.06	EPHA7-WT	0.144065	0.047446	0.0250565	0.119597	0	0.0248804	0	0.146941	0.0425022	0	0	0.0368656	0.00951868	0.155219	0.0538175	0.181748	0	0	0.0123423	0	0	0	0.013	0.287977	0.967312
TCGA.D3.A2JN.06	EPHA7-WT	0	0.135535	0.0261288	0.226013	0	0.0180309	0.106669	0.050946	0.0175758	0	0	0.104677	0.0278092	0.0646698	0.101771	0.0432369	0.0206443	0	0.056293	0	0	0	0.013	0.286459	0.969865
TCGA.BH.A0HQ.01	EPHA7-WT	0.107779	0	0.0767348	0.0190534	0	0.00391165	0	0.0124529	0.0102418	0	0	0.00451091	0	0.30899	0.0161359	0.196715	0.0128013	0	0.230674	0	0	0	0.013	0.297842	0.973928
TCGA.13.0920.01	EPHA7-WT	0.00315112	0.00450969	0.165324	0.185453	0	0.0142644	0	0.0964362	0.0441953	0.0149182	0	0.0692795	0.0404492	0.0572488	0.0767321	0.112863	0	0.00519969	0.107475	0	0	0.00250217	0.013	0.295031	0.964708
TCGA.85.7698.01	EPHA7-WT	0.0914599	0	0.0745656	0.0881473	0	0.143094	0	0.0605202	0.0115086	0	0	0.020097	0	0.174109	0.0720844	0.258148	0	0	0	0.0062665	0	0	0.013	0.294347	0.965569
TCGA.UY.A9PF.01	EPHA7-WT	0.228325	0	0.00772595	0.06706	0	0.028204	0	0.131711	0.0185394	0	0	0.0533707	0.00954031	0.0438906	0.047125	0.227056	0	0.0567669	0.0806857	0	0	0	0.013	0.296887	0.961063
TCGA.56.8629.01	EPHA7-WT	0.108049	0	0.0934286	0.136741	0	0.0191637	0	0.0553746	0.0002	0	0.017281	0.0519602	0.0190027	0.223597	0.0176074	0.155344	0	0.0617956	0.0335421	0	0	0.00688589	0.013	0.291344	0.966406
TCGA.EE.A2MT.06	EPHA7-WT	0.0670131	0	0.135185	0.183555	0	0	0.0225842	0.122288	0	0	0	0.0862962	0.0293233	0.0476234	0.0745142	0.190949	0.0009	0.0185603	0.0212367	0	0	0	0.013	0.299009	0.963896
TCGA.05.4384.01	EPHA7-WT	0.113467	0	0.0807845	0.0579108	0	0.106418	0	0.043579	0.0141144	0	0.00693993	0.0747874	0.052929	0	0.00788617	0.400224	0	0.0001	0.0276032	0	0	0.0132304	0.013	0.294558	0.964109
TCGA.CH.5754.01	EPHA7-WT	0.0616019	0	0.120169	0.135599	0	0.0873051	0	0.124032	0.0008	0	0	0.0576835	0.0156053	0.00355978	0.181268	0.158315	0.00816277	0	0.0458554	0	0	0	0.013	0.292171	0.972843
TCGA.44.6775.01	EPHA7-WT	0.10162	0	0.0832307	0.0304716	0	0.0710507	0	0.0297804	0.0157723	0	0	0.00892194	0.0233758	0.174689	0	0.345769	0.0256807	0.0402693	0.0493686	0	0	0	0.013	0.301203	0.964801
TCGA.DK.A6B6.01	EPHA7-WT	0.0001	0.0201919	0.149228	0.145997	0	0	0.0449287	0.111955	0.0687292	0.0728356	0	0.0723419	0	0	0.0690015	0.167854	0	0.0325831	0.0443025	0	0	0	0.013	0.29897	0.965495
TCGA.67.3772.01	EPHA7-WT	0.0228683	0.00367266	0.119612	0.05724	0	0.151333	0	0.0468328	0	0	0	0.0332119	0.0594897	0	0.0175498	0.289583	0.103295	0.0271838	0.066318	0	0	0.00180989	0.013	0.291238	0.961121
TCGA.CC.A9FW.01	EPHA7-WT	0.0469836	0	0.134565	0.144311	0	0.0101822	0	0.0886356	0.0511053	0	0	0.0590046	0.0472919	0.12111	0.061279	0.145277	0	0	0.090255	0	0	0	0.013	0.286394	0.965309
TCGA.EJ.A46I.01	EPHA7-WT	0.0350992	0	0.168562	0.219299	0	0.0273922	0	0.064967	0.017596	0	0	0.0427609	0.0344843	0.0434106	0.0589606	0.0659311	0.0140142	0	0.207333	0	0.0002	0	0.013	0.296435	0.96533
TCGA.AJ.A3NG.01	EPHA7-WT	0.137636	0	0.127802	0.0228684	0	0	0	0.0744074	0.0244701	0.0217896	0	0.0166738	0.0269607	0.280928	0.00845258	0.233688	0	0.0001	0	0.0241811	0	0	0.013	0.294845	0.976436
TCGA.22.5472.01	EPHA7-WT	0.0130245	0	0.00906552	0.087957	0	0.103937	0	0.0254	0.0108276	0	0.0127341	0.0307812	0.0396234	0	0.0106004	0.508339	0.0329755	0.00232839	0.0833132	0	0	0.0290936	0.013	0.289061	0.969435
TCGA.EE.A2A6.06	EPHA7-WT	0.0248012	0.163051	0.0157944	0.310815	0	0	0	0.0981256	0.077548	0	0	0.0931292	0.0321436	0.0216496	0.0635386	0.0994043	0	0	0	0	0	0	0.013	0.298916	0.971921
TCGA.44.2666.01	EPHA7-WT	0.0547158	0	0.112039	0.109691	0	0.114879	0	0.0201003	0.00690413	0	0	0.0415579	0.00261886	0	0	0.180291	0	0.0630297	0.278158	0	0.0139855	0.00203028	0.013	0.288621	0.965474
TCGA.D3.A8GS.06	EPHA7-WT	0	0.0776869	0.0816606	0.304374	0	0	0.0681956	0.0663223	0.0435277	0	0	0.0465933	0.0405572	0.0344056	0.0766905	0.158331	0	0	0.00165477	0	0	0	0.013	0.292602	0.967249
TCGA.T9.A92H.01	EPHA7-WT	0	0.0801367	0.124004	0.112202	0	0.0867161	0.00698935	0.120877	0.0141604	0	0	0.0681269	0.0002	0.111154	0.0436216	0.192761	0.0263983	0	0.0126198	0	0	0	0.013	0.289217	0.966556
TCGA.58.8388.01	EPHA7-MUT	0.105565	0	0.0631891	0.139628	0	0.0484191	0.0442745	0.131338	0.016715	0	0	0.0419071	0.0235162	0.0433278	0.114523	0.197024	0.00570113	0	0.0248716	0	0	0	0.013	0.289767	0.965298
TCGA.BR.8297.01	EPHA7-WT	0.166184	0.0525196	0	0.0912252	0	0.233316	0	0.0716816	0.0589946	0	0	0.0590994	0.0114444	0.0179412	0.0702799	0.0803081	0	0	0.0870058	0	0	0	0.013	0.29565	0.966357
TCGA.DK.A2I1.01	EPHA7-WT	0.08657	0	0.096462	0.116179	0.0135101	0	0	0.0437498	0.071406	0	0	0.0545865	0.0225544	0.0450552	0.139206	0.270198	0.0141777	0	0.025935	0	0	0.0004	0.013	0.291282	0.967244
TCGA.92.7341.01	EPHA7-WT	0.129453	0	0.071358	0.0481033	0	0.129217	0	0.0256162	0.0241838	0	0.0046742	0.0145588	0.00905484	0.214939	0.0232686	0.255107	0	0	0.0504672	0	0	0	0.013	0.300302	0.963235
TCGA.HD.7229.01	EPHA7-WT	0.0802152	0	0.106413	0.200401	0	0.069528	0.00251505	0.0132525	0.00914069	0	0	0.062918	0.0141685	0.105355	0.110858	0.0968843	0	0.0678873	0	0.0557605	0	0.0047019	0.013	0.287176	0.971986
TCGA.E9.A5FL.01	EPHA7-WT	0	0.0708157	0.0113981	0.0346666	0	0.0944125	0	0.0615159	0.00658263	0	0	0.00901999	0.0165604	0	0.0267669	0.599268	0.0275916	0.028893	0.0125087	0	0	0	0.013	0.299265	0.97129
TCGA.77.8008.01	EPHA7-MUT	0.105832	0	0.0636912	0.0565626	0	0.210282	0	0	0	0	0.0706147	0	0.0173842	0.0931733	0.016838	0.224639	0.00652489	0.00356519	0	0.130893	0	0	0.013	0.289166	0.965308
TCGA.CN.A498.01	EPHA7-WT	0.0122354	0.00261968	0.160279	0.157786	0	0	0.0207116	0.144818	0.00383754	0	0	0.0716464	0.00306966	0.0713408	0.102295	0.136604	0.043724	0.0446034	0.0244305	0	0	0	0.013	0.298021	0.965084
TCGA.E2.A158.01	EPHA7-WT	0.0667923	0	0.143025	0.134378	0	0	0	0.210307	0	0	0	0.0113812	0.0238978	0.0358404	0.131712	0.218667	0.0239999	0	0	0	0	0	0.013	0.286465	0.972927
TCGA.YC.A89H.01	EPHA7-WT	0.0717563	0	0.117458	0.07889	0	0	0.02235	0.0331785	0.0166113	0	0	0.0627394	0	0.249502	0.0663244	0.219453	0.0149486	0	0	0.0420833	0	0.00470598	0.013	0.293701	0.971147
TCGA.EJ.5509.01	EPHA7-MUT	0.119293	0	0.0828027	0.0924553	0	0.0911826	0	0.0394216	0.0273873	0	0	0.0387879	0.00996524	0.137833	0.0430469	0.201123	0.0241884	0	0.0925121	0	0	0	0.013	0.294452	0.961078
TCGA.E2.A107.01	EPHA7-WT	0.0222533	0.00259664	0.0154586	0.155429	0	0.0674945	0	0.0517288	0.0374641	0	0	0.0747	0.0128122	0.00161803	0.0340721	0.266367	0.0112742	0.00139795	0.245333	0	0	0	0.013	0.293927	0.962613
TCGA.56.8625.01	EPHA7-MUT	0.0202331	0	0.109818	0.137803	0	0.0724292	0	0.0411771	0.0662855	0	0	0.0642562	0.0429174	0.0696187	0.0932479	0.272958	0.00311665	0	0.00613982	0	0	0	0.013	0.287738	0.966975
TCGA.78.7542.01	EPHA7-WT	0.0946147	0	0.102008	0.128398	0	0	0	0.141331	0.031446	0	0	0.0206142	0.00341289	0.0557978	0.145071	0.150012	0.0106129	0.109432	0.00699157	0	0	0.0003	0.013	0.295445	0.970564
TCGA.13.1407.01	EPHA7-WT	0	0.221327	0.0236846	0.155266	0	0	0	0.178736	0.0942129	0	0	0.0128755	0.0365356	0.171108	0.0451921	0.039866	0.0007	0	0.0104045	0	0.0100853	0	0.013	0.300143	0.96378
TCGA.D3.A8GI.06	EPHA7-MUT	0	0.0573429	0.0139679	0.0821107	0	0.0254664	0.00645425	0.0134111	0.00608856	0	0.01581	0.0295853	0	0.514871	0.0311913	0.174931	0	0	0.0287696	0	0	0	0.013	0.29457	0.997273
TCGA.91.6828.01	EPHA7-WT	0.0716263	0	0.0873618	0.0684666	0	0.227497	0.0154863	0.00155029	0	0	0	0.00563374	0.0376319	0	0.0454795	0.389972	0.0190664	0.00471089	0.0120985	0	0	0.0134192	0.013	0.292232	0.964189
TCGA.CV.A6JY.01	EPHA7-WT	0	0.064621	0.126519	0.0814838	0	0.0180927	0	0.0950516	0.00958493	0	0	0.0382387	0	0.038542	0.00996273	0.240574	0.0461767	0.0172387	0.195967	0	0	0.0179468	0.013	0.295391	0.960555
TCGA.A2.A0EY.01	EPHA7-WT	0.10511	0	0.0696489	0.0752681	0	0.147811	0	0.0878704	0.00165041	0	0	0.0263166	0.0349287	0.013126	0.0513433	0.266423	0.0244043	0	0.0960996	0	0	0	0.013	0.295195	0.959378
TCGA.DI.A2QT.01	EPHA7-WT	0.0248873	0.0331094	0.135109	0.0738899	0	0	0	0.0600952	0.00603821	0.00724555	0	0.0764336	0.0610357	0.0602673	0.0903632	0.241279	0	0.0249176	0.0984366	0	0	0.00689271	0.013	0.288939	0.965467
TCGA.67.6216.01	EPHA7-WT	0.0197957	0.0661122	0.0802567	0.0792786	0	0.110987	0	0.0195632	0.0228517	0	0	0.0182428	0.0358175	0	0.0162203	0.35504	0.0821074	0.00878177	0.0757974	0	0	0.00914761	0.013	0.294479	0.960518
TCGA.CH.5750.01	EPHA7-WT	0.181421	0.0132868	0.0323877	0.175296	0	0.168198	0	0.143652	0.00682946	0	0	0.0207454	0.0243884	0.0801189	0.0729286	0.070021	0	0	0	0.0107276	0	0	0.013	0.293104	0.971307
TCGA.E9.A247.01	EPHA7-WT	0.0967671	0	0.122742	0.0750297	0	0.0502228	0	0.0527098	0.0177316	0	0	0.0142702	0.00111239	0.0680558	0.0946641	0.284523	0.0269071	0	0.095129	0	0	0.0001	0.013	0.297882	0.962277
TCGA.86.8671.01	EPHA7-WT	0.0623398	0.0182134	0.0591363	0.108894	0	0.0932662	0	0.098749	0.0636641	0	0.0307624	0	0	0.135477	0.122311	0.179755	0	0	0.0274316	0	0	0	0.013	0.296567	0.963181
TCGA.39.5022.01	EPHA7-WT	0	0.0733141	0.0662334	0.154348	0	0.123465	0.0132132	0.0626027	0.0275247	0	0	0.0777143	0.0184664	0.0494663	0.105592	0.156748	0.0193853	0	0.0519272	0	0	0	0.013	0.287788	0.965821
TCGA.GM.A2DA.01	EPHA7-WT	0.115358	0	0.0729345	0.230718	0	0.234714	0	0.0666467	0.0132595	0	0	0.0638131	0.00886383	0	0.0560657	0.0847141	0.00103983	0	0.0518723	0	0	0	0.013	0.289438	0.97623
TCGA.B6.A0I8.01	EPHA7-WT	0.136594	0	0.109398	0.0500835	0	0	0	0.0363431	0.00488019	0	0.00414411	0.00861029	0.00536822	0.0497904	0.0295692	0.458591	0	0.00774439	0.0892122	0	0	0.00967135	0.013	0.295657	0.970063
TCGA.71.8520.01	EPHA7-WT	0.144668	0	0.0691071	0.0314825	0	0.0855195	0	0.0284642	0.0326739	0	0.0526938	0	0	0.198316	0.0222122	0.262451	0	0.0471724	0.0110694	0.0130324	0	0.00113816	0.013	0.297035	0.964919
TCGA.VQ.A8P5.01	EPHA7-WT	0.1148	0	0.0871438	0.0909025	0	0.132941	0.0131959	0.0804227	0.0043292	0	0.00420604	0.050148	0.0183056	0.0552317	0.118217	0.194912	0	0.00747863	0	0.0047086	0	0.0230565	0.013	0.294483	0.964986
TCGA.CN.6016.01	EPHA7-WT	0	0.00739328	0	0.0237102	0	0.0606905	0	0.0968925	0.0869747	0	0	0.0611314	0	0.314022	0.0423333	0.240985	0.00536118	0	0.060506	0	0	0	0.013	0.297009	0.971244
TCGA.13.1497.01	EPHA7-WT	0	0.0714219	0.100777	0.0827188	0	0.140886	0	0.106863	0.0128111	0	0	0.0381623	0.0296702	0.125599	0.0811856	0.143454	0	0.0194224	0	0.0470285	0	0	0.013	0.29089	0.964406
TCGA.EE.A2A1.06	EPHA7-WT	0.123915	0.0125269	0.0363853	0.192421	0	0.0139493	0	0.114001	0.0521122	0	0	0.0541681	0.021303	0.0385199	0.113411	0.192024	0	0	0.0352634	0	0	0	0.013	0.291314	0.966243
TCGA.A7.A5ZX.01	EPHA7-WT	0.120848	0	0.0778766	0.076224	0	0.0149502	0	0.0634481	0	0	0	0.0328438	0.00112396	0.0749224	0.0123713	0.254472	0	0	0.270919	0	0	0	0.013	0.293223	0.965014
TCGA.53.7626.01	EPHA7-MUT	0.0660575	0	0.0949673	0.124436	0	0.184064	0	0.0531986	0	0	0	0.0449937	0.0485975	0.0102328	0.062242	0.276215	0.0136935	0	0.00803348	0.0110527	0	0.00221691	0.013	0.299121	0.960593
TCGA.L5.A43M.01	EPHA7-WT	0	0.0366643	0.143951	0.300482	0	0.164272	0	0.0322235	0.0141	0	0.0172493	0	0.0499572	0	0.00475646	0.0829567	0	0.031302	0	0.122085	0	0	0.013	0.295297	0.971733
TCGA.CR.7385.01	EPHA7-WT	0.0235752	0.040179	0.094213	0.120795	0	0.139435	0	0.0715783	0.0797769	0	0	0.0178143	0.00356186	0.0648985	0.0926578	0.226764	0.00577692	0.0138026	0.00207528	0	0	0.00309583	0.013	0.298911	0.962082
TCGA.NJ.A4YQ.01	EPHA7-WT	0.02263	0.0872996	0.03858	0.165542	0	0.0778564	0	0.0950083	0.0556452	0	0	0.0486567	0.0148684	0.134109	0.0660264	0.176707	0	0	0.0170702	0	0	0	0.013	0.291808	0.964268
TCGA.QK.AA3J.01	EPHA7-WT	0	0.0424642	0.149662	0.180913	0	0	0	0.136251	0.0496723	0	0	0.103058	0.00887204	0	0.043406	0.133843	0	0.0419639	0.109894	0	0	0	0.013	0.29681	0.965414
TCGA.D6.6824.01	EPHA7-WT	0.143525	0	0.0410593	0.0542586	0	0.221304	0.00987021	0.0334639	0.00255469	0	0.0594708	0	0.0151861	0.103848	0.0813173	0.189381	0.00342872	0	0.0404574	0	0	0.0009	0.013	0.297599	0.960404
TCGA.AZ.6600.01	EPHA7-WT	0.207772	0	0.0196328	0.0624838	0	0.102274	0	0.0189108	0.0758629	0	0.0436995	0	0	0.15329	0.0345009	0.205661	0	0	0	0.0759128	0	0	0.013	0.297514	0.963177
TCGA.95.7039.01	EPHA7-WT	0.111194	0	0.0797127	0.157392	0	0.101339	0.0192406	0.0562123	0	0	0	0.0197716	0	0.0485553	0.0879212	0.281008	0	0.00252021	0.0351319	0	0	0	0.013	0.29526	0.962963
TCGA.CR.7391.01	EPHA7-WT	0.0964831	0	0.0502874	0.151615	0	0.125505	0	0.0681105	0.0329288	0	0.0213393	0	0	0.106184	0.0862919	0.202139	0.010766	0	0.0325245	0.0158255	0	0	0.013	0.289858	0.964458
TCGA.CV.A45T.01	EPHA7-WT	0.0387407	0.0583015	0.0455559	0.124243	0	0.0359934	0.0272617	0.164057	0.0232963	0.027247	0.0328068	0	0	0.0619328	0.167218	0.147857	0	0	0	0.0454894	0	0	0.013	0.291908	0.969468
TCGA.4Z.AA84.01	EPHA7-WT	0.0950787	0	0.133956	0.0966728	0	0.0207934	0	0.0660744	0.0535966	0	0	0	0.0214745	0.161758	0.0150443	0.142096	0	0.0193207	0	0.169073	0.00506227	0	0.013	0.295598	0.967772
TCGA.DD.AADN.01	EPHA7-WT	0	0.0344606	0.132272	0.364814	0	0	0.0203912	0.0921805	0.0586045	0	0	0.0648552	0.0385632	0.0441188	0.0405007	0.10693	0	0	0.00231029	0	0	0	0.013	0.285848	0.979066
TCGA.XF.A9SH.01	EPHA7-WT	0	0.134292	0.0579447	0.0594333	0	0.0467024	0	0.0565851	0.043326	0	0	0.0429332	0.0195012	0.0131045	0	0.324165	0.081954	0.0328158	0.0872426	0	0	0	0.013	0.287776	0.962568
TCGA.A2.A0SW.01	EPHA7-WT	0.0102896	0.010856	0.115819	0.260956	0	0.100604	0	0.0361966	0.0816712	0	0	0.0404863	0.00660363	0.0363368	0.0523788	0.223724	0.00105869	0	0.0230192	0	0	0	0.013	0.290584	0.968405
TCGA.QB.A6FS.06	EPHA7-WT	0.141983	0	0.0481735	0.280467	0	0	0.00360197	0.109353	0.0515048	0	0	0.0674652	0.0249602	0.0552179	0.0278629	0.18941	0	0	0	0	0	0	0.013	0.294646	0.968277
TCGA.F4.6806.01	EPHA7-WT	0.149712	0	0.0616189	0.153438	0	0.189093	0	0.111427	0.0445567	0	0	0.01807	0.019811	0.0404512	0.0270173	0.115982	0.00332429	0.00219137	0	0.0633079	0	0	0.013	0.291174	0.968956
TCGA.FD.A6TG.01	EPHA7-WT	0.0552551	0	0.110006	0.130618	0	0.016982	0	0.0963109	0.0154427	0	0	0.0485744	0.0300206	0.00931478	0.0641716	0.280836	0.033795	0	0.108673	0	0	0	0.013	0.294944	0.960183
TCGA.D3.A51T.06	EPHA7-WT	0.0954621	0.0521859	0.0502567	0.157938	0	0.0328526	0	0.105418	0.0103121	0	0.00686436	0.0348512	0.0528246	0.0771243	0.0744162	0.225208	0	0	0.0242854	0	0	0	0.013	0.286045	0.965813
TCGA.44.2656.01	EPHA7-MUT	0.0568817	0	0.103224	0.166097	0	0.0791367	0.0567369	0.0197471	0	0	0	0.0517282	0.0149154	0.0147472	0.0550173	0.262851	0.00588226	0.0489832	0.0586119	0	0	0.00543999	0.013	0.300275	0.958366
TCGA.59.2348.01	EPHA7-WT	0.0765064	0	0.129674	0.0187904	0	0.0556744	0	0.0724359	0.0230205	0	0.00751111	0.0139217	0.0128732	0.151065	0.0554479	0.363779	0	0	0.0098923	0	0	0.00940901	0.013	0.287675	0.973342
TCGA.ZF.A9R3.01	EPHA7-WT	0	0.0473857	0.154891	0.0568776	0	0.0556822	0	0.14167	0.0633549	0	0	0.0345294	0.0174993	0	0.0001	0.171458	0.126686	0.0900377	0.0397802	0	0	0	0.013	0.300315	0.959311
TCGA.BB.7872.01	EPHA7-WT	0.0012881	0.0138941	0	0.121536	0	0.0658743	0	0.0826351	0	0	0	0.0718109	0.00840618	0.101003	0.209078	0.203336	0.0395207	0.0205074	0.0491382	0	0	0.0119307	0.013	0.297257	0.973742
TCGA.EJ.7315.01	EPHA7-WT	0.0651579	0.146572	0.00900957	0.130421	0	0.223938	0	0.0686368	0.115898	0	0	0.0263718	0.00598204	0.0229285	0.0411151	0.082453	0	0	0.0615174	0	0	0	0.013	0.286194	0.972513
TCGA.60.2725.01	EPHA7-WT	0.0930842	0	0.0643205	0.160574	0	0.129492	0.0283896	0.0610389	0	0	0	0.0114133	0.0430636	0.0617589	0.0519629	0.243587	0.0108621	0.00586718	0.00861897	0.00535781	0	0.0206087	0.013	0.300942	0.958656
TCGA.A6.A565.01	EPHA7-WT	0.165863	0.0451113	0	0.132397	0.0739773	0.270319	0.00587831	0	0	0	0.0322039	0	0.0157922	0.0501584	0.0189499	0.161971	0	0	0.0185687	0.00762586	0	0.00118442	0.013	0.294969	0.968007
TCGA.UF.A7JO.01	EPHA7-WT	0.012791	0	0.00408051	0.157672	0	0.00699777	0.0469474	0.0545166	0.0218613	0	0	0.0986689	0.019815	0.12596	0.170876	0.21931	0.0513293	0.0079473	0.0012273	0	0	0	0.013	0.298487	0.971211
TCGA.CV.7177.01	EPHA7-WT	0.168182	0	0.0375391	0.0411089	0	0.0969407	0	0.0422416	0.0461293	0	0.013994	0	0.0203031	0.310556	0.00739319	0.159391	0.0186935	0.00544402	0	0.0320843	0	0	0.013	0.296701	0.969625
TCGA.CQ.5330.01	EPHA7-WT	0.00774586	0.00166679	0.0057677	0.0991943	0	0.161273	0.0245174	0.0153115	0.00505657	0	0.00300477	0.0796392	0.0386906	0.0499321	0.168782	0.266187	0.0197866	0	0.0534448	0	0	0	0.013	0.292165	0.96972
TCGA.CG.4476.01	EPHA7-WT	0.136366	0	0.0317081	0.04859	0	0.211664	0.01481	0.00483575	0.00333135	0	0	0.00348277	0.0002	0.0144476	0.0089884	0.307498	0.0274896	0	0.166948	0	0.00945846	0.0101497	0.013	0.29783	0.959051
TCGA.13.0724.01	EPHA7-WT	0.144839	0	0.0799393	0.162368	0	0.0750138	0	0.0900307	0.0119077	0	0	0.0183451	0.0319453	0	0.0151278	0.305779	0	0.0561091	0	0.00859569	0	0	0.013	0.297599	0.96276
TCGA.EE.A29N.06	EPHA7-WT	0.0182449	0.160302	0	0.154819	0	0.0246541	0.0230689	0.0822568	0.0750035	0	0	0.0189485	0.0193288	0.107073	0.0459651	0.270335	0	0	0	0	0	0	0.013	0.2903	0.964808
TCGA.VP.A87D.01	EPHA7-WT	0.104872	0	0.13279	0.112211	0	0.131553	0	0.123786	0.00629653	0	0	0.0782142	0.0179381	0	0.0526339	0.144356	0.0354537	0	0.0598955	0	0	0	0.013	0.298521	0.963879
TCGA.E2.A15C.01	EPHA7-WT	0.112556	0.029049	0.0569842	0.11773	0	0.105736	0	0.133446	0	0	0	0.0491142	0	0.0162151	0.0850165	0.179247	0	0.0215341	0.0922849	0	0	0.0010854	0.013	0.297114	0.961249
TCGA.GS.A9U4.01	EPHA7-WT	0	0.149125	0.00427748	0.140438	0	0	0.13633	0.0808209	0.0325236	0	0	0.046131	0	0.084146	0.171287	0.0720773	0	0.0755556	0	0	0	0.00728808	0.013	0.288978	0.973619
TCGA.BH.A0HX.01	EPHA7-WT	0.179963	0	0.0415452	0.0619745	0	0.136305	0	0.0100115	0.0225742	0	0	0.0190444	0	0.259845	0.0400651	0.183964	0	0	0.0447089	0	0	0	0.013	0.288073	0.970391
TCGA.05.4424.01	EPHA7-MUT	0.0884242	0	0.0893376	0.0667769	0	0.142735	0.0086211	0.0109124	0.00707848	0	0.0108408	0.0003	0.013709	0.0292976	0.04831	0.445298	0	0.00175466	0.0224141	0	0	0.0141885	0.013	0.299253	0.963618
TCGA.49.AAQV.01	EPHA7-WT	0.112749	0.00153359	0.0632245	0.0709002	0	0.0577625	0	0.146701	0.0324267	0	0	0.0148348	0.00144779	0.210586	0.0362107	0.233198	0	0	0.0184267	0	0	0	0.013	0.286518	0.969264
TCGA.3N.A9WD.06	EPHA7-WT	0.0831417	0.0885736	0.0179318	0.15804	0	0.00388556	0	0.19087	0.0274443	0	0	0.0577918	0.00280889	0.256899	0.0579305	0.0526264	0	0	0.00205626	0	0	0	0.013	0.295067	0.96832
TCGA.21.5787.01	EPHA7-WT	0.0563342	0	0.0911911	0.304444	0	0	0.0454466	0.0741828	0.0339012	0	0	0.156478	0.0242696	0.00538208	0.0265261	0.0884127	0.00622706	0.00726179	0.070934	0	0	0.00900811	0.013	0.293098	0.975932
TCGA.D3.A8GD.06	EPHA7-WT	0.147825	0.00195849	0.027181	0.205971	0	0.0866434	0	0.108074	0.0563504	0.0237751	0	0.0691678	0.0007	0.0883928	0.0940231	0.0856513	0	0	0.00431949	0	0	0	0.014	0.282402	0.976988
TCGA.XF.AAMQ.01	EPHA7-WT	0.072731	0	0.0985449	0.215384	0	0.0249349	0	0.164207	0.0189716	0	0	0.054145	0.00430839	0	0.0619466	0.206163	0.0259416	0.0359644	0.014483	0	0	0.00227496	0.014	0.283476	0.970542
TCGA.FT.A3EE.01	EPHA7-WT	0.0556139	0.1211	0.03128	0.0561229	0	0.0452926	0	0.0932317	0	0	0	0.046718	0.0170547	0	0	0.282056	0	0.167534	0.0572872	0	0	0.0267082	0.014	0.285099	0.964358
TCGA.22.5485.01	EPHA7-WT	0	0.0237876	0	0.10083	0	0.0233798	0.00256985	0.028579	0	0	0	0.00899674	0.0671588	0.0648825	0.0263501	0.457703	0.0794867	0	0.116277	0	0	0	0.014	0.283305	0.973791
TCGA.UF.A7JJ.01	EPHA7-WT	0	0.0401313	0.0979326	0.1079	0	0.15666	0.00703578	0.058977	0.02307	0	0	0.0154974	0.00409244	0.184697	0.0532426	0.227796	0.0101981	0.0107137	0	0.00205712	0	0	0.014	0.285134	0.96921
TCGA.BA.7269.01	EPHA7-WT	0.0449869	0	0.0976838	0.0967664	0	0.0918899	0	0.16778	0.00981871	0	0	0.020387	0.0203326	0.168271	0.0144776	0.223157	0.00841426	0.0199243	0	0.0161108	0	0	0.014	0.282698	0.969755
TCGA.VQ.A8PJ.01	EPHA7-WT	0.108779	0	0.102929	0.0464522	0	0.197976	0	0.0549246	0	0	0.0394744	0	0.00703852	0.121211	0.0615331	0.186453	0	0.0308644	0	0.0420203	0	0.0003	0.014	0.285798	0.967158
TCGA.A2.A04T.01	EPHA7-WT	0.1024	0	0.0550464	0.151907	0	0.0865386	0.0739374	0.0947207	0	0	0	0.0590422	0.0245369	0.0745349	0.063636	0.200482	0.00922847	0	0.00398862	0	0	0	0.014	0.285789	0.966046
TCGA.3L.AA1B.01	EPHA7-WT	0.134904	0	0.0663722	0.0641611	0	0.147507	0	0.0635863	0.0752473	0	0	0.0254679	0.0223581	0.0890066	0.0145402	0.172836	0	0	0.109248	0.0147653	0	0	0.014	0.281023	0.966347
TCGA.MS.A51U.01	EPHA7-WT	0.0989668	0	0.0774629	0.156833	0	0.145767	0	0.0468149	0.0458786	0	0	0.0243285	0.0218256	0	0.111551	0.20506	0.0248672	0	0.0406456	0	0	0	0.014	0.285335	0.967694
TCGA.E2.A1IJ.01	EPHA7-WT	0.0782122	0	0.0732548	0.109978	0	0.146882	0	0.0804415	0.00886746	0	0	0.0459379	0.00381316	0	0.0867184	0.18125	0.0303618	0	0.154283	0	0	0	0.014	0.283966	0.96489
TCGA.53.A4EZ.01	EPHA7-WT	0.0787657	0.0321617	0.0575353	0.209533	0	0	0	0.119203	0.0231087	0	0	0	0.0566484	0.0358783	0.0230494	0.253228	0.0480402	0.0001	0.0627305	0	0	0	0.014	0.282315	0.965477
TCGA.A2.A0D4.01	EPHA7-WT	0.0915593	0	0.08742	0.030641	0	0.0383573	0	0.0666657	0	0	0	0.0488465	0.0177756	0.0683915	0.0349538	0.336632	0.00306289	0	0.175695	0	0	0	0.014	0.282141	0.967873
TCGA.A8.A07R.01	EPHA7-WT	0.148009	0	0.070862	0.0296101	0	0.0866236	0	0.0658632	0.0356855	0	0	0.0405557	0.0120776	0.0919164	0.110602	0.27769	0	0.00141335	0	0	0	0.0290906	0.014	0.284751	0.970167
TCGA.BH.A1EU.01	EPHA7-WT	0.0551266	0.110847	0	0.0857144	0	0.199943	0	0.0453851	0	0.0196281	0	0.0686765	0	0.023722	0.0442579	0.209135	0.0528681	0	0.0662116	0.0162915	0	0.00219316	0.014	0.281862	0.965933
TCGA.FF.A7CQ.01	EPHA7-WT	0.11001	0.0356082	0.0503585	0.215928	0	0	0.14955	0.0365049	0	0	0	0.0953728	0.020394	0.0105013	0.0754091	0.0709498	0	0	0.119164	0	0	0.0102499	0.014	0.284668	0.969464
TCGA.EJ.5526.01	EPHA7-WT	0.0626759	0	0.127392	0.106099	0	0.204433	0	0.0150997	0	0	0	0.0475089	0.00763355	0.014153	0.0309637	0.201365	0.0374338	0	0.145243	0	0	0	0.014	0.283779	0.965853
TCGA.ZF.AA5N.01	EPHA7-WT	0.00785337	0.0196381	0.1719	0.0443435	0	0.0325399	0.124671	0.065589	0	0	0.0545348	0	0.0165948	0.0496912	0.033858	0.133142	0	0.132841	0	0.101178	0	0.011626	0.014	0.28271	0.969196
TCGA.CG.4444.01	EPHA7-WT	0.0913098	0	0.0771797	0.0321609	0	0.174849	0.0299614	0.0434774	0.0280969	0	0	0	0.00639462	0.0659387	0.0456016	0.29101	0.013448	0	0.00177419	0.0417609	0.0149344	0.0421026	0.014	0.283515	0.965681
TCGA.50.5044.01	EPHA7-WT	0.0393784	0	0.105609	0.14429	0	0.0368683	0.0535751	0.0445069	0.02344	0	0	0.0996805	0	0	0.0285993	0.299326	0.0153897	0.0269775	0.0758772	0	0	0.00648178	0.014	0.284719	0.965719
TCGA.L9.A444.01	EPHA7-WT	0.0404427	0	0.0958193	0.246829	0	0.0965018	0.035047	0.04231	0.0520463	0	0	0.0703732	0.0257962	0.00926331	0.0995557	0.130475	0.00713279	0	0.0484076	0	0	0	0.014	0.281913	0.973093
TCGA.78.7166.01	EPHA7-MUT	0.00995539	0.0664975	0.0958864	0.206906	0	0.0347667	0	0.212069	0.00891588	0	0.028257	0.00555406	0.00911653	0.0985934	0.0831846	0.139242	0	0	0.00105576	0	0	0	0.014	0.283879	0.972927
TCGA.ER.A19P.06	EPHA7-WT	0.0459146	0.0654871	0.0291374	0.321675	0	0.0357505	0	0.104577	0.0657922	0	0	0.0441269	0.023432	0.0362858	0.08384	0.133304	0.00628906	0	0	0.00438859	0	0	0.014	0.283121	0.97629
TCGA.E7.A678.01	EPHA7-WT	0	0.0209028	0.183135	0.153944	0	0.140752	0	0.115228	0.103913	0	0.0244647	0.0724445	0.0173558	0.0016095	0.00861848	0.118489	0	0.0186991	0.0204431	0	0	0	0.014	0.281124	0.982147
TCGA.AP.A5FX.01	EPHA7-WT	0	0.0342022	0.143963	0.202949	0	0.0888786	0	0.147364	0.0411705	0	0	0.0698709	0.0144061	0	0.0474138	0.159678	0	0	0.0501029	0	0	0	0.014	0.285818	0.97314
TCGA.BD.A3EP.01	EPHA7-WT	0.0795022	0.136059	0	0.0739556	0	0.202889	0	0.0797461	0.065854	0	0	0.0272373	0.00366341	0	0.0336709	0.265905	0.030373	0	0	0	0	0.00114383	0.014	0.280918	0.970411
TCGA.A8.A09V.01	EPHA7-WT	0.057834	0	0.145422	0	0.088246	0	0	0.0170975	0	0	0.00688545	0	0.0360649	0	0.0230403	0.404388	0	0	0.203103	0	0	0.0179192	0.014	0.282216	0.973509
TCGA.70.6722.01	EPHA7-WT	0.0844403	0	0.085956	0.026271	0	0.138956	0	0.00772683	0.00957866	0	0.0196249	0.00316854	0	0.134236	0.0639064	0.317984	0	0.0573345	0	0.0475569	0	0.00326076	0.014	0.285111	0.97016
TCGA.CV.7434.01	EPHA7-WT	0	0	0.00265344	0.167366	0	0.104458	0.00434172	0.0445282	0	0	0.00528785	0.105178	0.0307965	0	0.228677	0.251182	0.0126665	0.028215	0.01465	0	0	0	0.014	0.281139	0.992806
TCGA.61.1743.01	EPHA7-WT	0	0.171671	0.0366221	0.0519408	0	0.00246646	0	0.11228	0.0155101	0	0.0302775	0.00178308	0.035003	0.0751624	0.0587133	0.33483	0	0.0737403	0	0	0	0	0.014	0.283522	0.9688
TCGA.2F.A9KO.01	EPHA7-WT	0.0764624	0	0.10096	0.236141	0	0.0723374	0.0152812	0.134281	0.0227319	0	0.00660338	0.0267322	0.0290035	0.0006	0.0288965	0.196188	0.00559454	0.0459645	0	0.00225617	0	0	0.014	0.282116	0.972169
TCGA.KP.A3VZ.01	EPHA7-WT	0.164553	0	0.0692086	0.0833306	0	0.0389698	0	0.19669	0	0.010015	0	0.0335837	0.0143233	0.0743613	0.0366971	0.247689	0	0.0305787	0	0	0	0	0.014	0.280862	0.9709
TCGA.A7.A426.01	EPHA7-WT	0.100816	0	0.0657394	0.203819	0	0.0795982	0	0.0682818	0.0377002	0	0.0394331	0	0.0408277	0	0.0170966	0.15629	0.00881471	0	0.179167	0	0	0.00241561	0.014	0.285477	0.965668
TCGA.PG.A7D5.01	EPHA7-WT	0.0955286	0	0.102662	0.180732	0	0.0791609	0	0.173618	0	0.0162956	0	0.0877697	0	0.0506291	0.0255145	0.130167	0	0.0579232	0	0	0	0	0.014	0.282399	0.975526
TCGA.E6.A8L9.01	EPHA7-WT	0	0.0313618	0.00866091	0.155006	0	0.0212787	0	0.0480122	0.0210015	0	0	0.3289	0	0.0418732	0.0114082	0.152714	0	0.0230202	0.152683	0	0	0.00408052	0.014	0.283663	1.00069
TCGA.CV.6935.01	EPHA7-WT	0.0968394	0	0.102264	0.0319884	0	0.0540994	0	0.0203296	0.0196678	0	0.00884002	0	0	0.339511	0.0181645	0.281792	0	0.0103466	0.0161581	0	0	0	0.014	0.282945	0.987415
TCGA.D3.A1Q8.06	EPHA7-WT	0.157701	0	0.0345738	0.0608904	0	0.087559	0	0.0123649	0.0178259	0	0.0119086	0	0.0367277	0	0.0199047	0.488778	0.00497409	0	0.0667916	0	0	0	0.014	0.283156	0.971918
TCGA.NK.A5CT.01	EPHA7-WT	0.0372721	0	0.137522	0.11892	0	0.0848983	0	0.111489	0.00535542	0	0.0615243	0	0.0201518	0.0328036	0.0237537	0.13205	0	0.0851437	0	0.11919	0	0.0299271	0.014	0.283104	0.968028
TCGA.34.5236.01	EPHA7-WT	0.104425	0	0.0573414	0.0497949	0	0.144201	0	0.0124992	0.0372057	0	0	0.00182127	0.0276913	0.195258	0.00969469	0.295347	0.0258276	0	0	0.0345769	0	0.00431556	0.014	0.283936	0.971631
TCGA.AR.A0TY.01	EPHA7-WT	0.0990307	0.00808708	0.0598658	0.0677276	0	0.0476218	0	0.0524048	0.0143654	0	0	0.018087	0	0.203059	0.0114025	0.358773	0	0	0.0508359	0.00873861	0	0	0.014	0.283788	0.97414
TCGA.E7.A6MD.01	EPHA7-WT	0.148458	0.0737083	0.00102386	0.0738067	0	0.209413	0	0.206375	0.0250063	0	0	0	0.0290955	0.00614615	0.0234472	0.166564	0	0.00725762	0.029699	0	0	0	0.014	0.284204	0.973814
TCGA.F1.A448.01	EPHA7-WT	0.115196	0	0.0691958	0.0320501	0	0.13504	0	0.0393951	0.0129686	0	0	0.0212862	0.00266127	0.0979431	0.00110206	0.191499	0	0.013183	0	0.237654	0	0.0308242	0.014	0.28457	0.974409
TCGA.DK.A3X2.01	EPHA7-WT	0	0.174926	0.0477061	0.0699533	0	0	0	0.0923847	0	0	0	0.0541871	0.0101352	0.0568641	0	0.330015	0	0.142193	0	0.0216357	0	0	0.014	0.285111	0.968032
TCGA.V1.A9OY.01	EPHA7-WT	0.0496566	0	0.146832	0.194687	0	0.12841	0	0.0750831	0	0	0	0.0653902	0.0146725	0.0218914	0.0416747	0.150946	0.00460065	0	0.106155	0	0	0	0.014	0.284551	0.970155
TCGA.RG.A7D4.01	EPHA7-WT	0.0167551	0.00298936	0.141549	0.314966	0	0	0	0.17825	0.0486851	0	0	0.0865857	0.033928	0.0871971	0.0242434	0.0598059	0	0	0.00504523	0	0	0	0.014	0.282463	0.983759
TCGA.D8.A1XF.01	EPHA7-WT	0.0225253	0	0.174124	0.0367422	0	0.0116865	0	0.0409983	0.0343351	0	0	0.00158926	0	0.184554	0.0738785	0.327854	0.0116819	0	0.0800306	0	0	0	0.014	0.281048	0.979663
TCGA.18.3414.01	EPHA7-WT	0.146751	0	0.049801	0.205533	0	0.0198685	0.0216334	0.0880029	0.0183072	0	0	0	0	0	0.0477228	0.169876	0.0597236	0.00246592	0.0464711	0	0	0.123844	0.014	0.284983	0.965828
TCGA.DK.A1AD.01	EPHA7-WT	0.0278847	0.0284853	0.104663	0.261175	0	0	0.00944003	0.0459046	0.130562	0	0	0	0.0570238	0.00465086	0.118166	0.147727	0.0104149	0.0178242	0	0.0360777	0	0	0.015	0.278442	0.973613
TCGA.13.1496.01	EPHA7-WT	0	0.117244	0.0457106	0.0906043	0	0.0587043	0	0.103521	0.00106444	0.0174404	0	0.0724403	0.0154928	0	0.0756173	0.299953	0	0.0899748	0	0.00448029	0	0.00775167	0.015	0.280332	0.969489
TCGA.43.8116.01	EPHA7-WT	0.00711079	0.0704572	0.0853295	0.0841769	0	0.279054	0	0.0554993	0.00408714	0	0.0125271	0.0294386	0.00838243	0.10856	0.0381531	0.163932	0	0.0406607	0.00485178	0.00777939	0	0	0.015	0.280647	0.969661
TCGA.59.2351.01	EPHA7-WT	0	0.0512513	0.100913	0.0611138	0	0.143555	0	0.023289	0.0625653	0	0	0.0630634	0.0217122	0.0927528	0.0341942	0.337646	0	0	0	0.00794372	0	0	0.015	0.277069	0.971702
TCGA.F7.A50I.01	EPHA7-WT	0.0263064	0	0.134288	0.195579	0	0	0	0.088367	0.00760225	0	0.00665686	0.0366038	0.00570909	0.121542	0.135618	0.128106	0.0560043	0.0445987	0.0130182	0	0	0	0.015	0.280189	0.974982
TCGA.V5.AASW.01	EPHA7-WT	0.132238	0	0.0885973	0.117868	0	0.078717	0	0.0905895	0.125179	0	0.0432364	0	0.0283005	0.0249329	0.0167702	0	0	0.145905	0	0.0824624	0	0.0252035	0.015	0.280232	0.973019
TCGA.WT.AB44.01	EPHA7-WT	0.0278494	0	0.156357	0.103395	0	0	0	0.163769	0.00421395	0	0	0.0465496	0	0.0770816	0.0287012	0.338238	0	0.0121044	0.0417417	0	0	0	0.015	0.276465	0.973997
TCGA.EE.A2MJ.06	EPHA7-WT	0.175263	0	0.010846	0.293023	0	0	0	0.139849	0.076823	0	0	0.0435163	0.0223138	0.00385088	0.0807738	0.140265	0.0039823	0	0.0094938	0	0	0	0.015	0.279406	0.979568
TCGA.22.1016.01	EPHA7-WT	0.110347	0	0.0468709	0.0439812	0	0.129072	0	0.0247439	0.0178752	0	0	0.0117813	0.0987661	0.0558454	0	0.326175	0	0.0618259	0.0155739	0	0	0.0571418	0.015	0.27675	0.969971
TCGA.EB.A44N.01	EPHA7-MUT	0.197464	0	0.0154076	0.0690168	0	0.0506936	0	0.134554	0.0251223	0	0	0.0225375	0	0.196045	0.0434949	0.206216	0	0	0.0394482	0	0	0	0.015	0.277378	0.972662
TCGA.DC.6681.01	EPHA7-WT	0.0595477	0	0.139125	0.0687392	0	0.184537	0	0.0470599	0.0253769	0	0.0253871	0	0	0.179432	0.0423345	0.194199	0	0	0.0247586	0.00948382	0	0	0.015	0.279238	0.97242
TCGA.EE.A2A0.06	EPHA7-WT	0.0201283	0.0581627	0.0764652	0.128957	0	0.00889639	0.0283443	0.0235069	0.00181057	0.0624742	0	0.0199594	0.00737782	0.0591778	0.0363672	0.435871	0	0	0.0227705	0	0	0.009731	0.015	0.280533	0.972277
TCGA.KK.A7B2.01	EPHA7-WT	0.0649817	0	0.114709	0.178973	0	0.129019	0	0.092533	0.00947541	0	0	0.0473701	0.0339388	0.00512536	0.0647334	0.20049	0.0214651	0	0.0371872	0	0	0	0.015	0.276474	0.971893
TCGA.73.4658.01	EPHA7-WT	0.0772212	0	0.0721464	0.0727897	0	0.143327	0.0131269	0.0441197	0.0338773	0	0	0.0312501	0.0314198	0	0.0263574	0.307324	0.103904	0.00821559	0	0.023577	0	0.0113441	0.015	0.280532	0.966077
TCGA.AH.6547.01	EPHA7-WT	0.0404479	0.131353	0.0100696	0.0681776	0	0.166725	0	0.0468262	0.0535981	0	0.00277865	0	0	0.153232	0.0350456	0.282093	0	0	0	0.00965454	0	0	0.015	0.278238	0.971995
TCGA.HU.A4H2.01	EPHA7-WT	0.00152371	0.0915153	0.0793272	0.210325	0	0.144805	0	0.125392	0.0374862	0	0	0.0235864	0.0282186	0.017627	0.066328	0.0881727	0.0131764	0.00427913	0	0.0682375	0	0	0.015	0.277748	0.975349
TCGA.B6.A2IU.01	EPHA7-WT	0.127864	0	0.06252	0.106706	0	0.0787511	0	0.0829822	0	0	0	0.0189195	0.0709827	0	0.0452499	0.273624	0.0213861	0	0.111014	0	0	0	0.015	0.279446	0.965794
TCGA.60.2716.01	EPHA7-WT	0.0735892	0	0.127339	0.096435	0	0	0	0.0694186	0.0300032	0	0.00591996	0	0.0244684	0.131773	0.0360883	0.297922	0	0.0189039	0.0870159	0	0	0.00112305	0.015	0.278003	0.971535
TCGA.CN.A641.01	EPHA7-WT	0.0214181	0	0.164864	0.0416674	0.0348698	0	0	0.0837496	0	0.00418952	0.0427104	0	0.00625361	0.0283276	0.0204274	0.312647	0.0791836	0.0335715	0	0.0943574	0	0.0317634	0.015	0.280673	0.970841
TCGA.D3.A3BZ.06	EPHA7-WT	0.108473	0	0.0435451	0.286025	0	0	0.0347162	0.103757	0.0249508	0	0.0121713	0.0115464	0.0467511	0.055142	0.0998995	0.145553	0.0131851	0	0.014284	0	0	0	0.015	0.278765	0.972233
TCGA.FC.A6HD.01	EPHA7-WT	0.00999926	0.0710469	0.109487	0.221666	0	0	0	0.141047	0	0	0	0.0664107	0.0169526	0	0.0105928	0.188117	0	0	0.16468	0	0	0	0.015	0.279389	0.970776
TCGA.CG.5722.01	EPHA7-WT	0.127404	0	0.0504912	0.366592	0	0	0	0.167304	0.0468976	0	0	0.0715785	0.00825194	0.0015652	0.0553764	0.0630904	0.0253375	0.00677269	0.00933882	0	0	0	0.015	0.276876	0.990235
TCGA.L5.A8NF.01	EPHA7-WT	0.0635655	0	0.140683	0.00278788	0	0.221681	0	0.0509305	0.0655884	0	0	0.0475178	0	0.0797678	0.0282434	0.214808	0	0.0416558	0	0.0189845	0	0.0237868	0.015	0.27781	0.970635
TCGA.92.8065.01	EPHA7-WT	0.0203564	0	0.12299	0.0934486	0	0.103827	0	0.0291318	0.0445923	0	0	0.0534549	0.0207404	0.0331716	0.052687	0.388933	0.00508545	0.00654728	0.0203288	0	0	0.00470468	0.015	0.27867	0.971253
TCGA.CN.6010.01	EPHA7-WT	0	0.0388282	0.119242	0.117543	0	0.194722	0	0.0618781	0	0	0	0.0429108	0.0214294	0.00480983	0.0762518	0.209774	0.00116685	0.0153129	0.0961316	0	0	0	0.015	0.277969	0.968819
TCGA.CQ.A4CD.01	EPHA7-WT	0	0	0	0.0814277	0	0.140165	0	0.0153885	0	0	0.0257653	0.0216258	0.00437849	0.165429	0.202761	0.149462	0	0.0378487	0	0.149591	0	0.00615772	0.015	0.279116	0.991898
TCGA.XF.A8HD.01	EPHA7-WT	0.054302	0	0.0990629	0.258334	0	0	0	0.0930445	0.0298768	0	0	0.140304	0.0148084	0	0.00497838	0.129919	0	0.153913	0.0186469	0	0	0.00281015	0.015	0.280659	0.978432
TCGA.TN.A7HI.01	EPHA7-WT	0.0166991	0	0.106486	0.269336	0	0	0.0179144	0.155437	0.036918	0	0	0.023308	0	0.0848136	0.0771916	0.176649	0.0007	0	0	0.034524	0	0	0.015	0.277488	0.974702
TCGA.FA.A7Q1.01	EPHA7-WT	0.315465	0.228825	0	0.116832	0	0	0	0.0874155	0.0254635	0	0	0.001	0.00383345	0.0703906	0.0139181	0.132358	0	0	0.00454587	0	0	0	0.015	0.278064	1.00912
TCGA.97.8171.01	EPHA7-WT	0.0760259	0	0.117474	0.0545509	0	0.022619	0	0.0653043	0	0	0.0189746	0	0.0249027	0.113285	0.0124305	0.454566	0.0119241	0.00450509	0.016335	0.00710268	0	0	0.015	0.27942	0.979707
TCGA.D3.A3CB.06	EPHA7-WT	0.0477503	0.00919815	0.0596167	0.221663	0	0	0.0145384	0.0396741	0.0735523	0	0	0.0331289	0.0240822	0.148923	0.0457776	0.242573	0.00569393	0	0.0338279	0	0	0	0.015	0.277651	0.969807
TCGA.DA.A1I0.06	EPHA7-WT	0.061981	0.117244	0	0.193975	0	0	0	0.0858617	0.139668	0	0.0222555	0	0.0397668	0.13252	0.00877741	0.162823	0	0	0.035128	0	0	0	0.015	0.278568	0.970133
TCGA.EW.A1OV.01	EPHA7-WT	0.0758629	0.0779017	0	0.235043	0	0.182434	0	0.0682143	0.0497605	0	0	0.0292587	0.0101997	0.0627287	0.0633513	0.13881	0	0	0.00643588	0	0	0	0.015	0.276637	0.977695
TCGA.B6.A0RQ.01	EPHA7-WT	0.0985616	0	0.092957	0.123596	0	0	0	0.114508	0	0	0	0.037359	0.00221319	0.0397944	0.0105608	0.3202	0.0264911	0	0.133758	0	0	0	0.015	0.279945	0.967835
TCGA.64.1680.01	EPHA7-WT	0.120272	0	0.0714582	0.0580752	0	0.145943	0	0.0676768	0	0	0	0.0444031	0.00444685	0	0.0417333	0.362577	0.0050984	0	0.077693	0	0	0.0006	0.015	0.278939	0.968371
TCGA.BR.6563.01	EPHA7-MUT	0.12797	0.0344426	0.00165895	0.244789	0	0.0779092	0	0.0852322	0.0522233	0	0	0.0517339	0.0107634	0.0117964	0.0275644	0.191056	0.0181912	0	0.0646688	0	0	0	0.015	0.280695	0.971239
TCGA.77.8156.01	EPHA7-WT	0.063456	0	0.066446	0.15026	0	0.142663	0.037886	0.0528066	0.0345244	0	0.0124762	0.011488	0.0002	0.104171	0.0749749	0.217505	0.0139495	0	0.0171952	0	0	0	0.015	0.277058	0.969828
TCGA.CA.6716.01	EPHA7-WT	0.141621	0	0.0786152	0.0514297	0	0.0850989	0.0358981	0.0744689	0.0138986	0	0.0571226	0	0.00348982	0.140671	0.0158134	0.240492	0	0.0005	0	0.0608325	0	0	0.015	0.277943	0.970925
TCGA.OL.A66N.01	EPHA7-WT	0.0185497	0.0380441	0.0833251	0.131069	0	0.10454	0	0.117081	0.00352227	0	0	0.0608977	0.00529762	0	0.00547344	0.240842	0	0	0.191359	0	0	0	0.015	0.276698	0.969279
TCGA.38.4626.01	EPHA7-WT	0.00690282	0.00242641	0.00853463	0.049708	0	0.113432	0	0.0269127	0	0	0.0146765	0.00627162	0.112557	0.108495	0	0.422715	0	0.0578322	0.0483984	0	0	0.0211381	0.015	0.278214	0.976356
TCGA.85.A513.01	EPHA7-WT	0.0176655	0.0748506	0.0539954	0.105186	0	0.179494	0.00231185	0.0645025	0.0300368	0	0	0.0641702	0.0315851	0.0594964	0.0527217	0.169817	0	0.004175	0.0671945	0.0227966	0	0	0.015	0.27946	0.966758
TCGA.UB.A7MF.01	EPHA7-WT	0.0790906	0	0.0818283	0.233701	0	0.0425021	0	0.0406188	0.0559791	0	0	0.0649961	0.0617453	0	0.165511	0.120693	0.0147371	0	0.0385977	0	0	0	0.015	0.277838	0.978306
TCGA.66.2791.01	EPHA7-WT	0.00785615	0.0311757	0.0889681	0.194487	0	0.0458407	0.0448335	0.0442635	0.0286674	0	0	0.0567653	0.0197535	0.00869314	0.128633	0.257992	0.00910784	0	0.0267919	0	0	0.00617138	0.015	0.277849	0.972033
TCGA.FC.A8O0.01	EPHA7-WT	0.00924547	0.0191812	0	0	0	0.148831	0	0.165954	0.00575501	0	0	0.117266	0.0566968	0.0768106	0.0132921	0.0398707	0	0	0.347097	0	0	0	0.015	0.276919	0.977888
TCGA.R6.A6XG.01	EPHA7-WT	0.028769	0.06976	0.108545	0.09825	0	0.160143	0	0	0.0355754	0	0	0.0256852	0.00896798	0.0224407	0.0320931	0.309815	0	0	0	0.0999558	0	0	0.015	0.280089	0.970051
TCGA.2Y.A9H8.01	EPHA7-WT	0.00585742	0	0.163969	0.272037	0	0	0	0.0906339	0.0869623	0	0	0.0488052	0.0390521	0.0541762	0.0538241	0.177001	0	0	0.00768216	0	0	0	0.015	0.27701	0.977212
TCGA.AN.A0XT.01	EPHA7-WT	0.0745328	0	0.0957533	0.0762564	0	0.104586	0	0.0496265	0.0141475	0	0	0.0233726	0.00315281	0	0.0637582	0.271771	0	0	0.223043	0	0	0	0.015	0.280724	0.967211
TCGA.VP.A879.01	EPHA7-WT	0.025706	0	0.161959	0.175237	0	0.0383119	0	0.0582533	0	0	0	0.0990452	0.0521978	0	0.0102996	0.175554	0.0186867	0.0145653	0.170184	0	0	0	0.016	0.274115	0.973349
TCGA.22.4604.01	EPHA7-WT	0.0714553	0	0.0625286	0.0782522	0	0.0985815	0.0006	0.0527187	0.0186558	0	0.0227266	0	0	0.126356	0.0917319	0.297742	0.0177817	0	0	0.0608907	0	0	0.016	0.274853	0.972979
TCGA.BH.A6R9.01	EPHA7-WT	0.0680427	0	0.0442275	0.0567183	0	0.0901521	0.00891628	0.0136344	0.020497	0	0.0008	0.0129567	0	0.154234	0.0637214	0.321077	0.0654991	0	0.0762579	0	0	0.00322261	0.016	0.273752	0.972989
TCGA.CC.A9FU.01	EPHA7-WT	0.0007	0.0133417	0.170641	0.123375	0	0.0573237	0	0.125286	0.0390331	0	0	0.0455284	0.0077556	0.109321	0.0601391	0.20542	0	0	0.0421566	0	0	0	0.016	0.275376	0.974002
TCGA.EW.A1P5.01	EPHA7-WT	0.0636083	0	0.00644534	0.0386254	0	0.066011	0	0.0442213	0.0302934	0	0	0.00701434	0	0.177788	0.0247117	0.445319	0	0.0240295	0.0579819	0	0	0.0139509	0.016	0.274677	0.981834
TCGA.D3.A2JF.06	EPHA7-WT	0.071586	0.0263898	0.0542906	0.196962	0	0	0	0.185125	0.0284043	0.00767773	0	0.0185793	0.00723974	0.103198	0.131334	0.158079	0	0	0.0111357	0	0	0	0.016	0.276026	0.975855
TCGA.D6.6517.01	EPHA7-WT	0.0336673	0	0.132849	0.0373603	0	0.103446	0.0189598	0.0131143	0.0170658	0	0.00522053	0.00613024	0.00720553	0.180167	0.0062744	0.287914	0.0567496	0.067107	0	0.0267685	0	0	0.016	0.273893	0.977223
TCGA.AF.A56L.01	EPHA7-WT	0.0778792	0	0.115272	0.103121	0	0	0	0.127793	0.0452979	0	0	0.0396736	0	0.114612	0.0788731	0.235438	0	0.00540034	0.0566396	0	0	0	0.016	0.275236	0.971556
TCGA.AR.A0TR.01	EPHA7-WT	0.181809	0.0008	0.0231105	0.10731	0	0.0745393	0	0.0740191	0.0648725	0	0	0.0539397	0.00402051	0	0.0418813	0.228922	0.0107385	0.0136818	0.117961	0	0	0.0024179	0.016	0.27391	0.969511
TCGA.97.7941.01	EPHA7-WT	0.134078	0	0.039282	0.0527214	0	0.0890817	0	0.0802327	0.0298227	0	0	0.0107919	0.00729012	0	0.0326344	0.443697	0.0184371	0	0.0619313	0	0	0	0.016	0.273445	0.972934
TCGA.VQ.A927.01	EPHA7-WT	0	0.0398701	0.134639	0.104146	0	0.287654	0	0	0.102703	0	0	0.0590502	0.0488849	0	0.0145521	0.177643	0	0.00245473	0.0155236	0	0	0.0128781	0.016	0.275406	0.975538
TCGA.XJ.A9DK.01	EPHA7-WT	0.0201112	0.0433295	0.121616	0.228388	0	0.0530084	0	0.0840962	0	0	0	0.0511543	0	0.131192	0.00779835	0.217002	0	0	0.0423046	0	0	0	0.016	0.275101	0.974693
TCGA.EO.A3AU.01	EPHA7-WT	0.132834	0	0.064221	0.14714	0	0.186107	0.0002	0.148174	0.0228441	0	0.0145295	0.0220784	0.017509	0.0778793	0.0101393	0.0734213	0	0.0721052	0	0.0108632	0	0	0.016	0.276139	0.976767
TCGA.AR.A1AH.01	EPHA7-WT	0.164093	0	0.0693779	0.0313333	0	0.116981	0	0.0382629	0.0159108	0	0.0048394	0	0.0214969	0.205144	0.0269715	0.238493	0	0.00592839	0	0.0611666	0	0	0.016	0.273974	0.977169
TCGA.MN.A4N5.01	EPHA7-WT	0.0691277	0	0.103122	0.186925	0	0.0121597	0	0.180798	0.0298574	0	0	0.0324548	0.0122542	0.0102819	0.120484	0.195149	0	0.0367285	0.0106579	0	0	0	0.016	0.276286	0.976529
TCGA.C8.A27A.01	EPHA7-WT	0.12823	0	0.0680556	0.0543314	0	0.0533997	0	0.037411	0.0273234	0	0	0.0510963	0	0.144863	0.0926829	0.340069	0	0	0.00253707	0	0	0	0.016	0.275162	0.977579
TCGA.CD.8534.01	EPHA7-WT	0.179654	0	0.0225888	0.0875957	0	0.0757182	0	0.0931326	0.0230412	0	0	0.0438065	0	0.0465086	0.0558448	0.269263	0.0040431	0	0.0988032	0	0	0	0.016	0.276083	0.968872
TCGA.KC.A7F6.01	EPHA7-WT	0.0421053	0.0462234	0.0964531	0.338811	0	0	0	0.0230875	0.0181018	0	0	0	0.0381454	0.0489966	0	0.190919	0	0	0.157157	0	0	0	0.016	0.273788	0.972884
TCGA.60.2703.01	EPHA7-WT	0.0354822	0.0083863	0.136537	0.026413	0	0.183543	0	0.00656773	0	0	0.044146	0	0	0.266673	0.00906469	0.161409	0	0.0634079	0	0.043205	0	0.0151658	0.016	0.275063	0.977904
TCGA.GN.A8LL.06	EPHA7-WT	0	0.100627	0.0845509	0.288015	0	0	0	0.127699	0.0432519	0	0	0.0443948	0	0.171722	0.0162409	0.0514791	0	0	0.072019	0	0	0	0.016	0.275568	0.976545
TCGA.50.5932.01	EPHA7-WT	0.0461203	0	0.130459	0.0451129	0	0.0952435	0	0.0477125	0	0	0	0.0355181	0.0527571	0.0157151	0.0134651	0.426685	0	0.0435407	0.0414907	0	0	0.00617993	0.016	0.275369	0.973547
TCGA.49.AAR0.01	EPHA7-WT	0.0812961	0	0.0570414	0.153381	0	0	0.020677	0.169192	0.0204034	0	0	0.031749	0.0281149	0.0478306	0.0261056	0.282511	0.00388389	0.00403197	0.0712418	0	0	0.00254089	0.016	0.274984	0.968625
TCGA.D8.A142.01	EPHA7-WT	0.0271527	0	0.128069	0.0799955	0	0.127275	0	0.0643396	0.00515531	0	0	0	0	0.203127	0.0786025	0.275809	0	0	0.0104744	0	0	0	0.016	0.27375	0.978596
TCGA.B6.A0IN.01	EPHA7-WT	0.0861036	0	0.0714549	0.0921727	0	0.121067	0	0.0758114	0.0656178	0	0.00818197	0	0.0358924	0.0293024	0.0740052	0.2561	0.0489495	0	0	0.0353406	0	0	0.016	0.275883	0.968711
TCGA.ZG.A9MC.01	EPHA7-WT	0.0790964	0.100316	0	0.0830962	0	0.170749	0	0.177698	0.0203287	0	0	0.0674771	0.00113956	0.067459	0.0435295	0.154623	0	0.0282254	0.00626237	0	0	0	0.017	0.268568	0.977283
TCGA.CM.6167.01	EPHA7-WT	0.164519	0	0.00170865	0.0300217	0	0.118743	0	0.0751432	0.0266608	0	0	0.0268453	0	0.0454399	0.0511997	0.254076	0.0128666	0	0.192776	0	0	0	0.017	0.267748	0.971286
TCGA.OL.A66K.01	EPHA7-WT	0.127001	0	0.0656305	0.177268	0	0.038452	0	0.156415	0.0545906	0	0	0	0.0465354	0.0468375	0.0403157	0.206184	0.00176744	0	0.0308455	0.00815786	0	0	0.017	0.271548	0.973197
TCGA.EE.A29X.06	EPHA7-MUT	0.0682373	0.0193632	0.0752687	0.163823	0	0.0317694	0	0.0780381	0.0489384	0	0.0007	0.0589584	0.0205158	0.0949746	0.0469661	0.273109	0.0188279	0	0.0005	0	0	0	0.017	0.266967	0.975314
TCGA.HU.A4G8.01	EPHA7-WT	0.0902618	0.0918469	0	0.100677	0	0.166322	0.0668111	0.0934234	0.00824227	0	0.0132358	0.0238137	0	0.0588181	0.0892434	0.15521	0	0.0003	0	0.0417513	0	0	0.017	0.271226	0.973529
TCGA.FW.A5DX.01	EPHA7-WT	0.1487	0	0.0684726	0.0893843	0	0	0	0.0747477	0	0.00910789	0	0.0623339	0.0155434	0.0900941	0.0708172	0.337857	0.0001	0	0.0328785	0	0	0	0.017	0.269472	0.976826
TCGA.D7.6525.01	EPHA7-WT	0.133093	0	0.0549625	0.10832	0	0.0116463	0	0.0387321	0.064114	0	0.00606822	0.0424473	0.0207029	0.0783349	0.0244026	0.352517	0	0.0191985	0.0373648	0	0	0.00809605	0.017	0.269702	0.973674
TCGA.D3.A8GC.06	EPHA7-WT	0	0.0441246	0.1278	0.116343	0	0.0744384	0	0.0962197	0.00952796	0	0	0.00314284	0.0463001	0.148481	0.0197772	0.308478	0.00163932	0	0.00372831	0	0	0	0.017	0.27216	0.976972
TCGA.AJ.A8CW.01	EPHA7-WT	0.103241	0	0.0883527	0.131082	0	0.0202908	0	0.183601	0.0379017	0	0	0.0436457	0.00129503	0.0994239	0.051616	0.23955	0	0	0	0	0	0	0.017	0.270195	0.976025
TCGA.XF.AAN1.01	EPHA7-WT	0	0.157386	0.0319817	0.148174	0.0925727	0	0	0.0901207	0	0	0.0277977	0	0.047143	0	0.036593	0.116952	0.15687	0.0758412	0	0.0185686	0	0	0.017	0.268795	0.970577
TCGA.A2.A0D1.01	EPHA7-WT	0.0500101	0	0.124246	0.190247	0	0	0	0.1038	0.0472607	0	0.0182343	0	0.0166799	0.22585	0.0632447	0.150312	0	0	0.0101141	0	0	0	0.017	0.267956	0.979358
TCGA.EI.6508.01	EPHA7-WT	0.0421123	0	0.127245	0.0764519	0	0.170703	0	0.0435727	0.0545123	0	0	0.0476255	0.0176645	0.0312973	0.0600553	0.295365	0.0138465	0	0.0195487	0	0	0	0.017	0.269118	0.97401
TCGA.BH.AB28.01	EPHA7-WT	0.126417	0.052066	0	0.0876919	0	0.203643	0	0.102905	0.0175453	0	0	0	0.0215655	0	0.0603295	0.294617	0.0003	0	0.0328752	0	0	0	0.017	0.266516	0.975674
TCGA.DD.A1EF.01	EPHA7-MUT	0.0598353	0.0401215	0.0782791	0.100416	0	0.170302	0	0.0779925	0.0525433	0	0	0.0315212	0.00619008	0.0708451	0.0478127	0.238773	0.0114182	0	0.0139512	0	0	0	0.017	0.271716	0.972563
TCGA.CV.7263.01	EPHA7-WT	0.0761667	0	0.0432265	0.0555104	0	0.0760565	0	0.0549494	0.0556065	0	0.0192129	0.014745	0	0.279696	0.0830573	0.213275	0.0178828	0	0.00412419	0.00649038	0	0	0.017	0.271756	0.97963
TCGA.DC.6155.01	EPHA7-WT	0.038954	0.0575055	0.0887925	0.0673711	0	0.107552	0	0.0402738	0.00417929	0	0.0977802	0	0	0.210804	0.0215418	0.118184	0.0129031	0	0	0.134159	0	0	0.017	0.270587	0.977135
TCGA.JY.A93D.01	EPHA7-WT	0.0408147	0.121907	0	0.043874	0	0.253924	0	0.0010066	0.0126895	0	0.0233591	0	0.0237991	0.00221598	0.0947788	0.313357	0	0.00362503	0.0646484	0	0	0	0.017	0.272147	0.970996
TCGA.58.8390.01	EPHA7-WT	0.118873	0	0.0711342	0.0665569	0	0.130897	0	0.0447285	0.0127356	0	0.0303698	0	0	0.254394	0.0440217	0.148224	0	0.0109778	0	0.0670872	0	0	0.017	0.269753	0.977802
TCGA.N6.A4V9.01	EPHA7-WT	0	0.00896281	0	0	0	0.0567972	0	0.229192	0	0	0.0127902	0.0030002	0.0165208	0.650247	0	0.00418211	0.0181303	0	0.0002	0	0	0	0.017	0.267355	1.035
TCGA.E2.A1IL.01	EPHA7-WT	0.11933	0	0.0864669	0.0619101	0	0.0272676	0	0.071368	0	0	0	0.0329461	0	0.0160215	0.0928492	0.358193	0.0270435	0	0.0988414	0	0	0.00776196	0.017	0.267085	0.975434
TCGA.A2.A04N.01	EPHA7-WT	0.138214	0	0.0302585	0.0618341	0	0.0602585	0	0.0837302	0	0	0	0.0312142	0	0.0741636	0.0418006	0.319994	0	0	0.158533	0	0	0	0.017	0.272716	0.970373
TCGA.ZF.A9RE.01	EPHA7-WT	0	0.0599771	0.134576	0.0908271	0	0	0	0.139062	0	0	0.0146117	0.0584634	0.0360046	0.0241921	0	0.149652	0	0.228342	0	0.0201159	0	0.0441764	0.017	0.271637	0.975165
TCGA.C8.A1HI.01	EPHA7-WT	0.0614469	0	0.119635	0.100254	0	0	0	0.0458832	0.0103505	0.00216548	0	0.00122457	0.0009	0.0341271	0.0788856	0.464732	0	0	0.0803774	0	0	0	0.017	0.271943	0.979163
TCGA.55.6980.01	EPHA7-WT	0.135544	0	0.0361028	0.047864	0	0.181287	0	0.0513109	0.0744838	0	0	0.0321138	0.102294	0.0197532	0.00270505	0.192704	0.0691363	0.0403894	0.0122134	0.00209854	0	0	0.017	0.269046	0.970047
TCGA.A7.A6VY.01	EPHA7-WT	0	0.0149221	0.121269	0.0437622	0	0.0372956	0.0172536	0.102983	0.010004	0	0	0.015156	0	0.174714	0.0690183	0.367435	0.00291763	0	0	0.0232693	0	0	0.017	0.270214	0.981971
TCGA.MP.A4SY.01	EPHA7-WT	0.104197	0	0.0748548	0.0166749	0	0.0852994	0	0.00797089	0.0361443	0	0.0185296	0	0.0002	0.170006	0.0300899	0.341737	0.0747254	0	0.0323386	0	0	0.00724118	0.017	0.271824	0.978361
TCGA.YL.A8HK.01	EPHA7-WT	0.112465	0	0.0681749	0.0920727	0	0.15993	0	0.12577	0	0	0	0.0679399	0.0183574	0.0620836	0.0587732	0.151415	0.013931	0	0.069087	0	0	0	0.017	0.27075	0.971812
TCGA.HU.A4G2.01	EPHA7-WT	0.15748	0	0.0305085	0.185379	0	0.0193691	0.145446	0.00721959	0.00225209	0	0	0.0767887	0.0144458	0	0.079541	0.196136	0.0471297	0.0006	0	0.0376696	0	0	0.017	0.270172	0.97419
TCGA.BF.AAP0.06	EPHA7-MUT	0.0931991	0.0349465	0.0325829	0.321145	0	0.0192408	0	0.147359	0.0459357	0	0	0.0922885	0.0133687	0.0137874	0.0632873	0.121442	0	0	0.00141709	0	0	0	0.017	0.26889	0.989538
TCGA.FS.A1YW.06	EPHA7-WT	0.113965	0.0450852	0.042636	0.0856632	0	0.120916	0	0.0756974	0.035873	0	0	0.0198101	0.0381572	0	0.0522465	0.335004	0.00584092	0	0.0291057	0	0	0	0.017	0.266777	0.973965
TCGA.O2.A52W.01	EPHA7-WT	0.0533664	0	0.105166	0.102505	0	0.0162625	0	0.122551	0	0	0.0183959	0	0.0364459	0.0822202	0.0390941	0.328072	0.0449227	0.0349279	0.0160702	0	0	0	0.017	0.266835	0.97507
TCGA.RS.A6TP.01	EPHA7-WT	0	0.0009	0.0011593	0.165537	0	0.0182088	0	0.141825	0.0173951	0	0	0.144962	0.00390868	0.11663	0.209736	0.103508	0	0.0515373	0.024644	0	0	0	0.017	0.266406	1.00279
TCGA.2A.AAYO.01	EPHA7-WT	0.0698093	0.0970418	0.0231011	0.0648778	0	0.154698	0	0.170469	0.027772	0	0	0.0377352	0.023278	0.0561606	0.0500266	0.0988049	0	0	0.126226	0	0	0	0.017	0.270949	0.971729
TCGA.KK.A7AW.01	EPHA7-WT	0.00521858	0.0737002	0.0867878	0.161958	0	0.00953579	0	0.103087	0.0075049	0	0.00600961	0.0108934	0.037533	0.104355	0.0795445	0.180189	0.0228224	0	0.11086	0	0	0	0.017	0.272779	0.968837
TCGA.BR.6705.01	EPHA7-WT	0.184451	0	0.0147018	0.0923518	0	0.165688	0	0.0764709	0.0645402	0	0	0.00527012	0.0240938	0.0170528	0.0365864	0.234663	0.0160908	0.00996933	0.0580703	0	0	0	0.017	0.270095	0.972344
TCGA.AF.A56N.01	EPHA7-WT	0.0603551	0	0.130083	0.049289	0	0.113379	0.0786818	0.0358594	0.0650312	0	0.0264829	0	0.0410306	0.187349	0.0159741	0.168474	0.00583084	0	0	0.0221803	0	0	0.017	0.272504	0.972881
TCGA.85.8287.01	EPHA7-WT	0.0327863	0.0737763	0.0387389	0.154058	0	0.169053	0	0.0595665	0.00326272	0	0	0.0321439	0.00386636	0.0913153	0.057021	0.204882	0	0.0531923	0.0263382	0	0	0	0.017	0.268586	0.97336
TCGA.D7.A6EX.01	EPHA7-WT	0.141087	0	0.0549466	0.101802	0	0.172995	0	0.101935	0.0545864	0	0	0.0442166	0.0305558	0	0.0567598	0.153434	0	0	0.0876818	0	0	0	0.017	0.270119	0.973491
TCGA.FS.A1ZT.06	EPHA7-WT	0.028235	0.0443609	0.0869516	0.314169	0	0.0429846	0.0159531	0.0875603	0.0451069	0	0.0183502	0.02056	0.0291107	0.032428	0.0814721	0.142751	0.00649343	0	0.00351301	0	0	0	0.018	0.26567	0.982848
TCGA.UY.A78M.01	EPHA7-WT	0.0432602	0	0.161257	0.0902054	0.0448999	0	0	0.0301363	0.00974015	0	0.0350104	0	0	0.338382	0.0392022	0.174336	0	0.0009	0.0327083	0	0	0	0.018	0.265821	0.991245
TCGA.E2.A14U.01	EPHA7-WT	0.0907659	0	0.101162	0.122662	0	0.054561	0	0.112728	0	0	0	0.0674216	0.001	0.0216391	0.0224091	0.391679	0	0	0	0.0140159	0	0	0.018	0.265436	0.979323
TCGA.V1.A9O9.01	EPHA7-WT	0	0.145388	0.0323143	0.109737	0	0.308826	0	0.0698346	0	0	0	0.0441483	0.00257054	0.0626632	0.101853	0.0735139	0.0003	0.00340831	0.0454268	0	0	0	0.018	0.265974	0.980637
TCGA.CG.5734.01	EPHA7-WT	0.019494	0.00611981	0.108822	0.0736234	0	0.164484	0.00812265	0.0902721	0.065784	0	0.00801988	0	0	0.170014	0.0470939	0.13746	0	0	0	0.0769284	0	0.0237616	0.018	0.266231	0.975794
TCGA.AC.A3QQ.01	EPHA7-WT	0.127657	0	0.0451164	0.230693	0	0.104969	0	0.0315458	0.0362409	0	0	0.038933	0.0360704	0.0429649	0.0473485	0.147781	0.001	0	0.105168	0	0	0.00454558	0.018	0.265953	0.974365
TCGA.D9.A3Z1.06	EPHA7-WT	0	0.0257862	0.103376	0.261018	0	0.00732214	0.00664387	0.1008	0.015465	0	0	0.0946183	0	0.0181615	0.0293362	0.328891	0.00299323	0	0	0	0	0.0055879	0.018	0.265217	0.981923
TCGA.EJ.5521.01	EPHA7-WT	0.044164	0.0365729	0.101552	0.134297	0	0.0896219	0	0.128668	0	0	0	0.0406791	0.0196602	0.0384217	0.0381279	0.240049	0.00908772	0	0.0790986	0	0	0	0.018	0.266059	0.973216
TCGA.52.7809.01	EPHA7-WT	0.0970438	0	0.083792	0.145274	0	0.0391668	0	0.18127	0	0	0	0.0965751	0.0283093	0	0.0443243	0.244523	0	0.0016812	0.0380406	0	0	0	0.018	0.265381	0.977433
TCGA.CR.7372.01	EPHA7-WT	0.0636139	0	0.0868078	0.0565815	0	0.138712	0	0.0224465	0.0513647	0	0.0453405	0	0.0310077	0.0940927	0.0212323	0.237739	0	0.0380681	0.0570239	0.0559702	0	0	0.018	0.265478	0.971737
TCGA.IN.A6RL.01	EPHA7-WT	0.0632506	0.030824	0.0740606	0.079349	0	0.181822	0	0.0281863	0.0128821	0	0.0156201	0	0.0593166	0	0.0659828	0.24098	0.0005	0	0	0.147226	0	0	0.018	0.266085	0.974348
TCGA.D6.A4ZB.01	EPHA7-WT	0	0.04882	0.133867	0.0562814	0	0.0368243	0	0.0815975	0	0	0.0269138	0	0	0.348384	0.0337418	0.167831	0	0	0	0.051122	0	0.0146166	0.018	0.266114	0.990917
TCGA.BH.A0BM.01	EPHA7-WT	0.0774874	0	0.0988993	0.0758278	0	0.100098	0	0.155318	0	0.025145	0	0.0618671	0.0002	0	0.0254265	0.338373	0	0.00263784	0.0322677	0.00647511	0	0	0.019	0.261806	0.978163
TCGA.T2.A6X2.01	EPHA7-WT	0.00367789	0	0.0116609	0.230588	0	0	0	0.100219	0.0484819	0	0.0113429	0.100021	0.00907033	0	0.194496	0.238657	0.0215449	0	0.0297959	0	0	0.0004	0.019	0.26435	0.993772
TCGA.B6.A0I9.01	EPHA7-WT	0.0926065	0	0.0684594	0.0758203	0	0.106243	0	0.0640499	0.00856406	0	0	0.0201611	0.0326365	0.0944194	0.106853	0.263135	0	0.0323581	0.0346943	0	0	0	0.019	0.26172	0.977168
TCGA.G4.6627.01	EPHA7-WT	0.11592	0.0192656	0.0332672	0.146118	0	0.162698	0	0.0676455	0.0293723	0	0	0.0494416	0	0.0390268	0.0636294	0.229961	0	0	0.0358241	0.00265438	0	0.00517525	0.019	0.261813	0.977271
TCGA.AX.A1C7.01	EPHA7-WT	0	0.176121	0.0176906	0.0249914	0	0.0201106	0	0.0374507	0.0345922	0	0.0852148	0.0100797	0.0820784	0.261673	0.00719735	0.146752	0	0	0.0960472	0	0	0	0.019	0.259909	0.97912
TCGA.77.7337.01	EPHA7-MUT	0.050927	0	0.100855	0.0818462	0	0.0601775	0.00434353	0.0210306	0.00795439	0	0.0186906	0.00869336	0	0.261176	0.0978064	0.259334	0	0.00481237	0	0.0137097	0	0.008643	0.019	0.262724	0.988248
TCGA.50.5068.01	EPHA7-WT	0.0216673	0.0777399	0.035142	0.143487	0	0.144266	0	0.0833582	0	0.0342166	0	0.0310518	0.0148343	0	0.0618976	0.225658	0.0935742	0	0.0331073	0	0	0	0.019	0.262789	0.974069
TCGA.G3.AAV3.01	EPHA7-WT	0.0257911	0	0.120856	0.273266	0	0	0	0.117587	0.0595055	0	0	0.0665559	0.0200265	0.085215	0.0548303	0.161378	0	0	0.0149886	0	0	0	0.019	0.26424	0.9818
TCGA.CA.5797.01	EPHA7-WT	0.0767591	0	0.0930603	0.104747	0	0.0524664	0	0.0505414	0.0279959	0	0	0.0287254	0	0.185944	0.136362	0.152198	0.0188465	0	0.0723536	0	0	0	0.019	0.260002	0.980828
TCGA.D7.6521.01	EPHA7-WT	0.170575	0	0	0.116131	0	0.144815	0	0.0615705	0.0455833	0	0	0	0.00638888	0.0828264	0.0291947	0.316904	0	0	0	0.0209258	0	0.00508514	0.019	0.264396	0.977972
TCGA.63.A5MB.01	EPHA7-WT	0.116029	0	0.0632178	0.10467	0	0	0	0.157824	0.00240704	0	0	0.039381	0.00315516	0.0329736	0.165055	0.255674	0	0.0413826	0	0.016769	0	0.00146268	0.019	0.262593	0.985297
TCGA.A2.A0CZ.01	EPHA7-WT	0.0546797	0	0.0815928	0.0932941	0	0.0627748	0	0.0472008	0.00738228	0	0	0.0411316	0	0.352894	0.0585392	0.114059	0	0	0.0864516	0	0	0	0.019	0.265061	0.983903
TCGA.98.7454.01	EPHA7-WT	0.0358166	0.0336896	0.0595761	0.0742702	0	0.230986	0.0629689	0.0272848	0	0	0.0235939	0.0333856	0.0300254	0.0101995	0.069536	0.176413	0.0168012	0.00933933	0.0855803	0	0	0.0205328	0.019	0.26295	0.971388
TCGA.D3.A1Q3.06	EPHA7-WT	0.188262	0	0.0167369	0.186941	0	0.12017	0	0.116475	0.0719907	0	0	0.0309638	0.00703351	0.0107268	0.0496135	0.186183	0.00340878	0	0.00996906	0	0	0.00152518	0.019	0.264764	0.982476
TCGA.D3.A3MR.06	EPHA7-WT	0	0.0950436	0.0447262	0.329044	0	0	0.0176168	0.0876428	0.0251947	0	0	0.0831172	0	0.115922	0.0980422	0.10365	0	0	0	0	0	0	0.019	0.263546	0.987207
TCGA.HC.7749.01	EPHA7-WT	0.0889628	0	0.0904705	0.112151	0	0.113128	0	0.052952	0.0007	0	0	0.0442343	0.0231138	0.0078564	0.0534356	0.276824	0	0	0.136173	0	0	0	0.019	0.263756	0.973078
TCGA.66.2780.01	EPHA7-WT	0	0.0127137	0.129762	0.0585991	0	0.0415104	0	0.0556145	0.00657322	0	0	0.0225502	0	0.194475	0.0662969	0.32942	0	0.0365279	0.00214698	0.0260125	0	0.0177971	0.019	0.263721	0.985826
TCGA.60.2707.01	EPHA7-WT	0.10078	0	0.0728926	0.00788441	0	0.13353	0	0.0169738	0.0153209	0	0.0969469	0	0.00843168	0.15154	0	0.201423	0	0.0347765	0	0.0848367	0	0.0746638	0.019	0.262444	0.97695
TCGA.61.1724.01	EPHA7-WT	0.101416	0	0.0873706	0.0457811	0	0.153757	0	0.033689	0.0392522	0	0.00650209	0.0192632	0.0252798	0.0944812	0.0792292	0.298582	0	0	0.0153974	0	0	0	0.019	0.263157	0.977174
TCGA.E2.A1L6.01	EPHA7-WT	0.117692	0	0.026255	0.0487601	0	0.0410112	0	0.0782731	0	0.0001	0.00418373	0	0	0.254338	0.0433397	0.357601	0	0	0.00444094	0.0239885	0	0	0.019	0.261004	0.991483
TCGA.H4.A2HQ.01	EPHA7-MUT	0	0.0632237	0.117007	0.126713	0.014412	0.0184531	0	0.124897	0	0	0	0.0780759	0.038452	0	0.0608832	0.231407	0	0.124683	0	0.00179282	0	0	0.019	0.264459	0.978048
TCGA.CV.6938.01	EPHA7-WT	0.00323393	0	0.0008	0.206208	0	0	0.00465391	0.0578888	0.0307539	0	0	0.0871474	0.0004	0.0785179	0.130439	0.293119	0.0249929	0.0672698	0.0127163	0	0	0.00188013	0.019	0.264785	0.986402
TCGA.GM.A2DF.01	EPHA7-WT	0	0.0554205	0.0841199	0.0406334	0	0.0570365	0	0.110936	0.00878813	0.00567356	0	0.0597893	0.0034144	0.10834	0.083456	0.35651	0	0	0	0.0258818	0	0	0.019	0.261774	0.980591
TCGA.BA.6872.01	EPHA7-WT	0.0522886	0	0.0780202	0.0555196	0	0.0781809	0	0.0308447	0	0	0.0236043	0	0	0.291424	0.0914056	0.158405	0	0.00173494	0	0.134334	0	0.00423907	0.019	0.262726	0.989217
TCGA.EJ.7781.01	EPHA7-WT	0.0100481	0.0488467	0.0974715	0.106446	0	0.178849	0	0.0592999	0.0113313	0	0	0.0278584	0.0758138	0.0499032	0.0373138	0.126498	0.020682	0	0.149638	0	0	0	0.019	0.263416	0.971747
TCGA.CD.A489.01	EPHA7-WT	0.152321	0.035092	0	0.136533	0	0.251311	0	0.05444	0.0191324	0	0	0.0366739	0.0126956	0	0.0334518	0.242275	0.0078979	0	0.0181759	0	0	0	0.019	0.261391	0.981092
TCGA.D3.A2JE.06	EPHA7-WT	0.135271	0.01926	0.0586224	0.0639929	0	0.0836728	0.00513585	0.157391	0.018743	0	0	0.0303356	0.00350961	0.23996	0.0770972	0.107009	0	0	0	0	0	0	0.019	0.261258	0.982435
TCGA.DF.A2KR.01	EPHA7-WT	0.0655403	0	0.0890885	0.181221	0	0	0	0.0499641	0.0990355	0	0	0.00151713	0.0533839	0.0864346	0.0194017	0.217663	0	0.0294695	0	0.0838698	0	0.0234113	0.019	0.261028	0.97507
TCGA.C8.A1HG.01	EPHA7-WT	0	0.0101612	0.105468	0.298808	0	0.0323075	0	0.0636959	0.0416452	0	0	0.0805726	0.00286085	0.00632162	0.0801135	0.257775	0	0	0.0189693	0	0	0.00130245	0.019	0.264547	0.983247
TCGA.DI.A1C3.01	EPHA7-WT	0.0148768	0	0.121424	0.21856	0	0.0547905	0	0.160037	0.0458543	0.0255348	0	0.0464674	0	0.0651726	0.0111577	0.220178	0	0	0.0159467	0	0	0	0.019	0.25991	0.984757
TCGA.HD.A4C1.01	EPHA7-WT	0	0.00944711	0.181991	0.089599	0	0.0419569	0	0.0888942	0.0009	0	0	0.060343	0.023871	0.101468	0.208034	0.139429	0.025275	0	0	0.00823016	0	0.0206032	0.019	0.261496	0.996108
TCGA.BT.A2LD.01	EPHA7-WT	0.0625345	0	0.105063	0.166876	0	0.020064	0	0.0799374	0.0338486	0.0139041	0	0.0461915	0	0.0895518	0.104845	0.181752	0	0.00493871	0.0801358	0	0	0.0103579	0.019	0.26249	0.976764
TCGA.A2.A0CL.01	EPHA7-WT	0.059922	0.0831872	0	0.200356	0	0.232641	0.02666	0.0379065	0.0632186	0	0.017369	0	0.01681	0.0163079	0.107214	0.121066	0	0	0.017342	0	0	0	0.019	0.26229	0.985127
TCGA.V1.A8MJ.01	EPHA7-WT	0.075334	0.0114904	0.0954555	0.105062	0	0.157685	0	0.0942004	0.0245361	0	0	0.0253922	0	0.198489	0.0660146	0.120189	0.00299458	0	0.0231568	0	0	0	0.019	0.259951	0.980403
TCGA.YL.A8SA.01	EPHA7-WT	0.0498165	0	0.152202	0.0418437	0	0.152402	0	0.168035	0	0	0	0.0447535	0.0248713	0	0.11763	0.143182	0.0294128	0	0.0758513	0	0	0	0.019	0.263606	0.979307
TCGA.13.1509.01	EPHA7-WT	0	0.0733709	0.0918716	0.170415	0	0.030098	0	0.0737888	0.0125242	0.147655	0	0.0667898	0	0	0.0403004	0.287549	0	0	0	0.00563812	0	0	0.019	0.260087	0.987116
TCGA.CH.5740.01	EPHA7-MUT	0.104054	0	0.102468	0.146206	0	0.159195	0	0.1388	0.0002	0	0	0.0466413	0.024467	0	0.108067	0.106484	0.00945801	0	0.0539751	0	0	0	0.019	0.263127	0.982739
TCGA.AR.A0TP.01	EPHA7-WT	0	0.024125	0	0	0	0.0596544	0	0.0332026	0.015129	0	0.0708117	0	0	0.617301	0	0.179514	0	0	0.0003	0	0	0	0.019	0.261599	1.04504
TCGA.DA.A95V.06	EPHA7-WT	0.0257061	0.0428075	0.0684266	0.253831	0	0.00110526	0	0.116491	0.0664576	0	0	0.0432071	0.0101688	0.0957274	0.0611311	0.207096	0	0	0.00784528	0	0	0	0.019	0.26409	0.978824
TCGA.DK.AA6P.01	EPHA7-WT	0	0.0702953	0.109604	0.0868187	0.0741366	0.0137126	0	0.0459113	0.0309561	0	0.0336502	0.0556318	0.0276749	0	0	0.296614	0.012158	0.0325996	0.110237	0	0	0	0.019	0.264769	0.972529
TCGA.S3.AA12.01	EPHA7-WT	0.0675627	0	0.101097	0.0916903	0	0.076385	0	0.0767653	0.0199019	0	0.0139603	0.00323473	0.0351488	0	0.0265213	0.34887	0.0126332	0	0.124741	0	0	0.00148894	0.019	0.264814	0.973144
TCGA.91.6835.01	EPHA7-WT	0.0500243	0.0862615	0	0.0955019	0	0.198847	0	0.0447595	0.0522399	0	0.0191989	0	0	0.122523	0.0637798	0.245162	0.00856321	0	0.0073096	0.00583059	0	0	0.019	0.260404	0.978173
TCGA.CG.4472.01	EPHA7-WT	0.0823486	0	0.0473836	0.076375	0	0.133066	0.00820446	0.0254844	0.0521857	0	0.0120323	0	0.00428606	0.0352293	0.0225266	0.317134	0.0575126	0	0.126232	0	0	0	0.019	0.261518	0.972662
TCGA.49.AAR3.01	EPHA7-WT	0	0.0193029	0.0795671	0.20432	0	0	0.0859406	0.0603396	0.0211442	0	0	0.0565997	0	0.069102	0.0735132	0.327732	0.00243905	0	0	0	0	0	0.019	0.260588	0.979293
TCGA.BH.A1FU.01	EPHA7-WT	0.12903	0	0.0297118	0.0492568	0	0.235162	0	0.0659879	0.00440935	0	0.00165351	0	0	0.179983	0.0726378	0.18526	0	0	0.0469078	0	0	0	0.019	0.261349	0.977936
TCGA.22.4596.01	EPHA7-WT	0.0647512	0	0.0591189	0.0594499	0	0.211847	0.0296637	0.0137281	0.00982339	0	0.0331944	0	0.0295372	0.0610182	0.0455204	0.272163	0.0546412	0.0098177	0.040968	0.00386017	0	0.0009	0.019	0.261846	0.972519
TCGA.D6.A6EK.01	EPHA7-WT	0.00973652	0	0.115932	0.189995	0	0	0.014505	0.152068	0.0925281	0	0	0.00674874	0	0.0147541	0.035332	0.282444	0.0206244	0.0538291	0.00968975	0	0	0.0018136	0.019	0.263342	0.977519
TCGA.EO.A22U.01	EPHA7-MUT	0.0812686	0	0.109781	0.149116	0	0.118352	0	0.159682	0.0234019	0	0	0.0844992	0	0.105977	0.0630245	0.10484	0	0	0.0001	0	0	0	0.019	0.263137	0.984288
TCGA.55.6986.01	EPHA7-WT	0.0763589	0	0.0672218	0.0521505	0	0.134723	0	0.0160211	0.011067	0	0	0.0202588	0.0110874	0	0.0124594	0.491389	0.0616429	0.0007	0.0437405	0	0	0.00116256	0.019	0.264027	0.979898
TCGA.V7.A7HQ.01	EPHA7-WT	0.00358818	0.0934961	0.0550065	0.0895353	0	0.0216232	0	0.0854785	0.0701305	0	0.0653462	0	0.0294994	0.00815915	0.0210085	0.33399	0	0.00194029	0.121198	0	0	0	0.019	0.261337	0.972997
TCGA.BR.4279.01	EPHA7-WT	0.0632359	0	0.0681418	0.0839957	0	0.150588	0.0203459	0.0163402	0	0	0	0.0131428	0.111714	0.044702	0.024424	0.209452	0.0144983	0.00111556	0	0.140603	0	0.0377018	0.019	0.259965	0.975572
TCGA.D8.A3Z6.01	EPHA7-WT	0.0927535	0	0.0872968	0.061015	0	0.0558575	0	0.0916777	0.00475622	0	0.0198747	0.0100939	0.024259	0.00229486	0.0439992	0.419319	0	0	0.0868023	0	0	0	0.019	0.262806	0.976613
TCGA.AC.A2FO.01	EPHA7-WT	0.104825	0	0.0454942	0.109233	0	0.328987	0	0.0185219	0	0	0	0.0405813	0.0206063	0	0.0513499	0.151371	0.0578078	0	0.0712227	0	0	0	0.019	0.263024	0.976035
TCGA.44.8120.01	EPHA7-MUT	0.0290782	0.0136108	0.105159	0.050778	0	0.131114	0	0.0315158	0	0	0	0.0110084	0.0203401	0.0262194	0.00544326	0.437367	0.0486049	0.0227081	0.0657159	0	0	0.0013379	0.019	0.259986	0.979736
TCGA.97.7553.01	EPHA7-WT	0.0818127	0	0.0469486	0.0944244	0	0.150327	0	0.0232666	0.00488293	0	0.015471	0.00891267	0.0437813	0.0990267	0.0310946	0.312131	0.0247622	0.0040446	0.0250025	0.00889811	0	0.0252128	0.02	0.259095	0.976739
TCGA.A7.A4SC.01	EPHA7-WT	0.125843	0	0.0514671	0.128252	0	0.202323	0	0.0403038	0.0181956	0	0.0103883	0.0110996	0.0287277	0	0.0486884	0.24507	0.0007	0	0.0889754	0	0	0	0.02	0.257265	0.976817
TCGA.61.1900.01	EPHA7-WT	0	0.115248	0.0792949	0.166937	0	0.0431924	0	0.202082	0.0197807	0	0	0.059302	0.0796865	0.0848208	0.0560298	0.0823692	0.00411613	0	0.00714173	0	0	0	0.02	0.257025	0.98204
TCGA.67.3773.01	EPHA7-WT	0.0771514	0	0.065264	0.0774606	0	0.144868	0	0.0630724	0	0	0	0.0854343	0.0133823	0	0.0467008	0.232438	0.0846604	0.0009	0.100215	0	0	0.00845197	0.02	0.258048	0.973485
TCGA.BH.A1FB.01	EPHA7-WT	0.0833294	0.0567795	0.00492118	0.116259	0	0.195324	0	0.101471	0.0072875	0	0	0.0173639	0.0153104	0	0.0546991	0.131424	0.102629	0	0.113202	0	0	0	0.02	0.258202	0.974871
TCGA.HC.7210.01	EPHA7-WT	0.0343769	0.0169006	0.125445	0.119553	0	0.137048	0	0.0515077	0.0007	0	0	0.114509	0.035915	0	0.0703341	0.181593	0.030119	0	0	0.0784677	0	0.003504	0.02	0.25805	0.982505
TCGA.A1.A0SJ.01	EPHA7-WT	0.0674557	0	0.083086	0.117248	0	0.234988	0	0	0.0192362	0	0	0.0268024	0.00979456	0.00735966	0.044305	0.261753	0.0561521	0	0.068863	0	0	0.00295686	0.02	0.257666	0.975629
TCGA.K7.A5RG.01	EPHA7-WT	0	0.0300331	0.0953085	0.3623	0	0	0.0151737	0.115842	0.0617203	0	0	0.0483553	0.0250583	0.0238655	0.0411	0.177794	0	0	0.00344883	0	0	0	0.02	0.258951	0.989149
TCGA.BH.A1FL.01	EPHA7-WT	0.127704	0	0.0480784	0.103676	0	0.105863	0	0.138842	0	0	0	0.0599628	0.00792059	0	0.0399108	0.200501	0.00969694	0	0.157137	0	0	0.0007	0.02	0.258342	0.976033
TCGA.55.7726.01	EPHA7-WT	0.0269041	0	0.110079	0.0267883	0	0.157572	0.0250903	0.00392258	0	0	0.0053814	0	0.00557927	0.0477578	0.0752619	0.186445	0.273166	0	0.00253092	0.0402661	0.00102377	0.0122309	0.02	0.256826	0.978628
TCGA.DY.A1DD.01	EPHA7-WT	0	0.119282	0.0676469	0.0740244	0.0380107	0	0.00336357	0.0797818	0	0.0157729	0	0.148215	0	0.266543	0	0.17429	0	0.00379844	0	0.00927027	0	0	0.02	0.259716	0.988696
TCGA.A2.A0YD.01	EPHA7-WT	0.11894	0	0.038996	0.0907273	0	0.100476	0	0.0379716	0.0165323	0.0008	0	0.0211953	0.00714172	0.062318	0.0555267	0.312661	0	0	0.132348	0	0	0.00434544	0.02	0.25812	0.975414
TCGA.BR.8080.01	EPHA7-WT	0.0679668	0.0886228	0.00353494	0.116857	0	0.106675	0	0.053426	0.0358373	0	0	0.0384227	0.0187359	0.0640222	0.0367202	0.235137	0	0	0	0.134042	0	0	0.02	0.256864	0.979167
TCGA.OL.A5D6.01	EPHA7-WT	0.0429407	0	0.104706	0.0509561	0	0.158283	0	0.0734465	0.0008	0	0	0.0127301	0.0395406	0	0.0734919	0.347965	0.0330095	0	0.0605774	0	0	0.00151325	0.02	0.258695	0.976402
TCGA.D5.6529.01	EPHA7-WT	0.0363891	0	0.0968439	0.0615725	0	0.157071	0	0.117319	0.0233456	0	0.0006	0.0113341	0.0002	0.057966	0.0640322	0.285797	0	0	0	0.0755859	0	0.0119415	0.02	0.25949	0.977629
TCGA.NJ.A7XG.01	EPHA7-WT	0.0183126	0.0296244	0.115174	0.0434593	0	0.144027	0	0.0580718	0.0256827	0	0	0.0944849	0.00807918	0	0.0128225	0.211751	0.0446564	0.0492147	0.14464	0	0	0	0.02	0.257363	0.974686
TCGA.DK.A2I4.01	EPHA7-WT	0.076061	0	0.046295	0.175946	0	0.108987	0.0299361	0.0393579	0.00415333	0	0	0.0984743	0.0252479	0.00508355	0.0795208	0.2499	0.00660601	0	0.0525469	0	0	0.0018843	0.02	0.257391	0.979244
TCGA.RD.A8N9.01	EPHA7-WT	0.0795496	0	0.0494106	0.142028	0	0.141941	0.005391	0.0493719	0.0853959	0	0	0.0235775	0.0249741	0.0232175	0.0297006	0.248454	0.00108992	0	0.0958989	0	0	0	0.02	0.258576	0.97514
TCGA.DA.A3F2.06	EPHA7-WT	0	0.031201	0.0677769	0.286853	0	0	0	0.0420378	0.0467734	0	0.0632676	0.033768	0.0230309	0.111268	0.0123828	0.271658	0	0	0.0099826	0	0	0	0.02	0.257179	0.984301
TCGA.A1.A0SH.01	EPHA7-WT	0.0963163	0	0.0701239	0.0485409	0	0.112289	0	0	0.00695902	0	0	0.0344051	0	0.0136666	0.0262077	0.4089	0.00377958	0	0.172643	0	0	0.00616879	0.02	0.257516	0.978876
TCGA.AY.A71X.01	EPHA7-WT	0	0.0289946	0.154965	0.106651	0	0.192218	0	0.0761353	0	0	0.0322717	0.00176157	0.00422482	0.135729	0.014057	0.201242	0	0	0	0.0517502	0	0	0.02	0.25863	0.982714
TCGA.CQ.6228.01	EPHA7-WT	0.0280541	0.0975392	0.0618524	0.00923836	0	0.0421475	0	0.0616527	0.0298324	0	0.0327364	0	0	0.338955	0.0142924	0.21691	0	0.0311048	0	0.0340837	0	0.0016017	0.021	0.256456	0.993866
TCGA.AR.A24Q.01	EPHA7-WT	0.0280081	0	0.0843158	0.176502	0	0.147669	0	0.0298627	0.00528896	0.0003	0	0.0123297	0	0.25116	0.0819379	0.147427	0.00360468	0	0.0316361	0	0	0	0.021	0.255755	0.984949
TCGA.F4.6808.01	EPHA7-WT	0.08604	0	0.104923	0.141048	0	0.0495963	0.0128622	0.127486	0	0	0	0.0486467	0.00723684	0.194401	0.0214976	0.0822965	0	0.049905	0	0.073572	0	0.0005	0.021	0.256058	0.982354
TCGA.WT.AB41.01	EPHA7-WT	0.0222227	0.02431	0.05723	0.205534	0	0	0.004515	0.124875	0.121912	0	0	0.0498761	0.0240538	0.104725	0.0256318	0.186245	0.009503	0	0.0393672	0	0	0	0.021	0.254472	0.980216
TCGA.10.0927.01	EPHA7-WT	0	0.0595627	0.0999008	0.317217	0	0	0	0.0455787	0.0609972	0.0229	0	0.0108477	0.0775834	0.0514797	0.0243408	0.122653	0.00364042	0	0.103298	0	0	0	0.021	0.253786	0.981094
TCGA.VQ.AA6J.01	EPHA7-WT	0.159044	0	0.0168004	0.0255882	0	0.13039	0.00764789	0.0781855	0.0179953	0	0.00876702	0	0	0.273221	0.110247	0.152234	0	0	0.019881	0	0	0	0.021	0.2552	0.987411
TCGA.EE.A2ME.06	EPHA7-WT	0.0515594	0.0789705	0	0.283046	0	0.0852778	0	0.0651495	0.0697021	0	0	0.0483272	0.0212825	0.0687594	0.0852403	0.106042	0.00426855	0	0.0323744	0	0	0	0.021	0.256121	0.986093
TCGA.43.7657.01	EPHA7-WT	0.0655319	0	0.120114	0.038602	0	0	0.00776873	0.0294809	0.00185936	0	0	0.0102007	0	0.405143	0.0192348	0.271659	0	0	0.0304057	0	0	0	0.021	0.256018	1.01266
TCGA.C8.A12W.01	EPHA7-WT	0.0305552	0	0.11457	0.0493331	0	0.099935	0	0.0117355	0.0175258	0	0.0123839	0	0	0.278984	0.0341052	0.330286	0	0	0.0185952	0	0	0.00199169	0.021	0.256206	0.995276
TCGA.77.A5G3.01	EPHA7-WT	0.0765116	0	0.0732447	0.158964	0	0.108896	0	0.0802108	0	0	0	0.0552066	0.00625585	0.0413855	0.0627583	0.322181	0.00182575	0	0.0125601	0	0	0	0.021	0.254756	0.981339
TCGA.IN.A6RI.01	EPHA7-MUT	0.0948862	0	0.0974413	0.0125028	0	0.129796	0	0.0961696	0.0379703	0	0.0232718	0	0	0.178112	0.0107238	0.219843	0	0.0153276	0	0.0788744	0	0.00508193	0.021	0.254467	0.98238
TCGA.BR.8077.01	EPHA7-WT	0.0969432	0	0.0495874	0.0953418	0	0.102295	0.110246	0.0505351	0.0247479	0	0	0.0622383	0.0107368	0.0697413	0.0559358	0.197766	0.0351534	0.00568171	0	0.033051	0	0	0.021	0.255998	0.976188
TCGA.E2.A15K.01	EPHA7-WT	0.112545	0.0347139	0	0.147773	0	0.121071	0	0.10858	0.0544211	0	0	0.0389646	0.00285671	0.0798602	0.0186026	0.239201	0	0	0.0414105	0	0	0	0.021	0.255082	0.980538
TCGA.FD.A62N.01	EPHA7-WT	0.040215	0	0.0600959	0.226835	0	0.0871037	0.0484628	0.0527182	0.0273235	0	0	0.0445677	0.0184143	0	0.138412	0.200256	0.0293656	0	0.0262296	0	0	0	0.021	0.254145	0.984294
TCGA.24.0975.01	EPHA7-WT	0.138937	0	0.0518131	0.0793803	0	0.186158	0	0.0284709	0.0697072	0	0	0.0856568	0.0473695	0.0170175	0.0805205	0.207287	0	0	0	0.00768156	0	0	0.021	0.256107	0.981025
TCGA.AO.A03L.01	EPHA7-WT	0.0936227	0	0.0576339	0.113956	0	0.200979	0	0.0730043	0.0199911	0	0	0.0193911	0.0180795	0	0.0941268	0.222857	0.001	0	0.0848202	0	0	0.0006	0.021	0.255808	0.978258
TCGA.AO.A1KO.01	EPHA7-WT	0.0280159	0	0.121997	0.128883	0	0.324562	0	0	0	0	0	0.0426645	0.0161006	0.029951	0.00671022	0.257785	0	0.0205169	0.022814	0	0	0	0.021	0.254961	0.98364
TCGA.BH.A0DG.01	EPHA7-WT	0.122726	0	0.0387221	0.0592187	0	0.113086	0.0008	0.0766718	0.00473426	0	0.00566532	0	0.0052697	0.106702	0.102644	0.317159	0	0	0.0465772	0	0	0	0.021	0.256044	0.980931
TCGA.KK.A8I7.01	EPHA7-WT	0.129705	0	0.0516048	0.0912125	0	0.17517	0	0.0507465	0.0004	0	0	0.0594058	0.084043	0	0.0422871	0.187179	0.0234954	0	0.104728	0	0	0	0.021	0.253973	0.975853
TCGA.60.2695.01	EPHA7-WT	0.0412398	0	0.0864862	0.222335	0	0.0499013	0	0.117673	0.00785709	0	0.00358096	0.0324925	0.0164146	0.0088321	0.0893015	0.293169	0	0	0.0171802	0	0	0.0135369	0.021	0.256098	0.981643
TCGA.EW.A1P3.01	EPHA7-WT	0.138212	0	0.0377903	0.0722418	0	0.0576831	0	0.097538	0	0.015072	0	0.0368453	0	0	0.107714	0.287722	0	0	0.146362	0	0	0.00281937	0.021	0.254698	0.97849
TCGA.O2.A52S.01	EPHA7-WT	0.065689	0	0.0807207	0.0834513	0	0.0618637	0.0361764	0.0571364	0.0097381	0	0	0.0351655	0.00423613	0.175535	0.114449	0.250798	0.0171964	0	0.00784519	0	0	0	0.021	0.25449	0.984088
TCGA.YD.A9TA.06	EPHA7-WT	0.110224	0	0.0374641	0.0895926	0	0.0245682	0	0.0777372	0.0199092	0	0	0.0682481	0.0107753	0.248052	0.0839822	0.218544	0	0	0	0.0109036	0	0	0.021	0.255984	0.986326
TCGA.97.7937.01	EPHA7-WT	0.0421084	0	0.122253	0.0501534	0	0.0245305	0	0.0761803	0.00255803	0	0	0.0206641	0.00435958	0.106498	0.0450288	0.323929	0.0391511	0.00347137	0.123027	0	0	0.0160871	0.021	0.254071	0.980962
TCGA.HC.7078.01	EPHA7-WT	0.0315531	0	0.129717	0.0850173	0	0.127183	0	0.101504	0	0	0	0.0451399	0.00630865	0.0508324	0.0303967	0.271941	0.00105426	0	0.119351	0	0	0	0.021	0.253893	0.978387
TCGA.55.8206.01	EPHA7-WT	0.0777565	0	0.0550692	0.0549426	0	0.0825235	0	0.0258241	0.0199087	0	0	0.0424216	0.307404	0	0	0.144018	0.0338775	0.0182557	0.137998	0	0	0	0.021	0.255577	0.977057
TCGA.CV.7427.01	EPHA7-WT	0	0	0.00494706	0.174084	0	0.103544	0.0400591	0.0875495	0.03163	0	0	0.0443374	0.0237643	0	0.162269	0.192268	0.115552	0	0.0139189	0	0	0.00607592	0.021	0.254659	0.986257
TCGA.56.8628.01	EPHA7-WT	0.0461403	0	0.077205	0.0906801	0	0.151517	0	0.00807897	0.00224359	0	0	0.0279979	0.00820279	0.169376	0.0356993	0.360468	0.0004	0	0.0220137	0	0	0	0.021	0.255351	0.985128
TCGA.A2.A0ST.01	EPHA7-WT	0.0416345	0.0712423	0.0109127	0.131676	0	0.188544	0	0.124287	0.0335641	0	0	0.0097076	0.0107525	0.0599495	0.133907	0.117527	0.0662955	0	0	0	0	0	0.022	0.25373	0.985234
TCGA.EJ.7792.01	EPHA7-WT	0.0891002	0	0.0831449	0.0604289	0	0.269573	0	0.0821989	0.00232037	0	0	0.0433034	0.0427944	0.0104651	0.0195459	0.128713	0	0.0004	0.167976	0	0	0	0.022	0.253729	0.979428
TCGA.44.4112.01	EPHA7-WT	0.0395524	0.00604317	0.0982004	0.140951	0	0.139264	0	0.0278483	0	0	0	0.0242114	0.0391	0	0	0.33012	0	0.0400622	0.114647	0	0	0	0.023	0.250402	0.978685
TCGA.DK.AA6X.01	EPHA7-WT	0	0.102841	0.0445922	0.0563885	0	0.0344581	0	0.130622	0.0378153	0	0	0.0202525	0.0190754	0	0.025204	0.24486	0.141493	0.0421453	0.0981578	0	0	0.0020951	0.023	0.251652	0.97443
TCGA.66.2790.01	EPHA7-WT	0.065961	0	0.0687715	0.164912	0	0.144798	0	0.0251634	0.0240622	0	0	0.0522576	0.0219175	0.0550533	0.189272	0.149107	0	0	0.0387247	0	0	0	0.023	0.251778	0.991459
TCGA.EE.A3JA.06	EPHA7-WT	0.0003	0.0362248	0.101519	0.244956	0	0.0557107	0	0.0681827	0.0242458	0.00493379	0	0.0569536	0.0173806	0	0.0605562	0.32017	0.00344904	0	0.00258305	0	0	0.00279544	0.023	0.25007	0.986188
TCGA.E9.A1RG.01	EPHA7-WT	0.0857721	0	0.0573032	0.150545	0	0.051957	0	0.0842777	0.0323874	0	0	0.0353249	0.0172426	0	0.0691908	0.361015	0.0213551	0	0.0266829	0.00655246	0	0.0004	0.023	0.250802	0.981023
TCGA.2A.A8VL.01	EPHA7-WT	0.0613655	0	0.135129	0.213674	0	0.0609095	0	0.115921	0	0	0	0.139823	0.014403	0	0.0490541	0.123463	0.0315667	0	0.0543613	0.0003	0	0	0.023	0.252309	0.991924
TCGA.DM.A1D7.01	EPHA7-WT	0	0.0728705	0.0950681	0.194434	0	0.111842	0	0.0887768	0.054169	0	0.0076858	0	0.0336661	0.0302978	0.00421103	0.137981	0.0005	0.0348371	0	0.130059	0.00363809	0	0.023	0.252197	0.982624
TCGA.FW.A3R5.06	EPHA7-MUT	0.0984595	0.0871395	0.0008	0.113639	0	0.0625404	0	0.0947326	0	0	0	0.0539668	0.0180946	0.0423546	0.10727	0.297155	0.00401444	0	0.0198705	0	0	0	0.023	0.251504	0.983055
TCGA.CD.5800.01	EPHA7-WT	0.155533	0	0.0280858	0.129284	0	0	0	0.130178	0.0568484	0	0	0.00544636	0	0.288706	0.0128543	0.172358	0	0.0006	0	0.0201267	0	0	0.023	0.251732	0.990118
TCGA.CH.5746.01	EPHA7-WT	0.0520438	0	0.135156	0.156472	0	0.171254	0	0.127138	0	0	0	0.0353239	0.020299	0.0219886	0.0193833	0.1797	0	0.00434212	0.0239357	0.0529654	0	0	0.023	0.25036	0.986276
TCGA.V1.A9OX.01	EPHA7-MUT	0.0795441	0	0.0954093	0.173536	0	0.0765911	0	0.142118	0.00596	0	0	0.0682923	0.0213406	0.0554743	0.0225616	0.190143	0	0	0.0690304	0	0	0	0.023	0.253506	0.981175
TCGA.AR.A24L.01	EPHA7-WT	0.15951	0	0.0349265	0.06279	0	0.0580934	0	0.0155068	0.0186326	0.00780947	0	0.00578399	0	0.16569	0.0349739	0.315503	0	0	0.114321	0	0	0.00646019	0.023	0.251923	0.984104
TCGA.L5.A4OQ.01	EPHA7-WT	0.221263	0	0	0.0708581	0	0.257961	0	0.0919408	0.00284979	0	0	0.0311251	0.00988401	0	0.115256	0.108339	0	0.00763771	0	0.0828843	0	0	0.023	0.251567	0.990711
TCGA.EY.A210.01	EPHA7-WT	0.0535401	0	0.0737608	0.173237	0	0	0	0.164663	0.0058429	0	0	0.0547384	0.0001	0.0318324	0.0647403	0.368662	0	0.00597395	0	0.00293472	0	0	0.023	0.252321	0.984214
TCGA.BB.4223.01	EPHA7-WT	0.0205168	0.0974481	0.0111917	0.321186	0	0	0.0039971	0.125035	0.0672264	0	0	0.0166613	0.00540438	0.0653093	0.0770474	0.171254	0.00970965	0	0.00801348	0	0	0	0.023	0.252739	0.98752
TCGA.85.A50M.01	EPHA7-WT	0	0.0537624	0.0984687	0.0197152	0	0.186769	0	0.0087856	0	0	0.03955	0	0.0239721	0.225207	0.00405251	0.242926	0	0.026057	0	0.0660795	0	0.00465536	0.023	0.253118	0.985661
TCGA.B6.A40C.01	EPHA7-WT	0	0.09797	0.0308977	0.155232	0	0.0898622	0	0.0873803	0.12743	0	0.0278508	0.0151442	0.043682	0	0.0441048	0.216796	0.00776819	0	0.0498925	0	0	0.00598956	0.023	0.250672	0.979944
TCGA.98.A53B.01	EPHA7-MUT	0.101528	0	0.0446956	0.0714012	0	0	0	0.0916974	0.0007	0	0	0.0312419	0	0.277417	0.0548275	0.279119	0	0	0.0473231	0	0	0	0.023	0.252538	0.990611
TCGA.55.8205.01	EPHA7-WT	0.0782205	0	0.0438863	0.115852	0	0.108226	0.0444808	0.033882	0	0	0	0.0845528	0.0433836	0	0.0785631	0.31128	0.0260955	0	0.0165453	0	0	0.0150319	0.023	0.252041	0.979799
TCGA.B6.A401.01	EPHA7-WT	0.0560326	0.0644229	0	0.0843143	0	0.0754919	0	0.189218	0.0164843	0	0.0208456	0	0.00692863	0.253223	0.0181877	0.176862	0	0	0.0359133	0.00207646	0	0	0.023	0.253172	0.985038
TCGA.A2.A0CS.01	EPHA7-WT	0.00374004	0	0.0007	0.0642083	0	0.17272	0	0.02587	0.129458	0	0	0.0179676	0.0224816	0	0	0.248418	0.133915	0.00752415	0.170888	0	0	0.00212478	0.023	0.251111	0.978208
TCGA.BA.A6DE.01	EPHA7-WT	0.0710315	0	0.109118	0.0899248	0.00540574	0	0.0780585	0.0929649	0	0	0	0.0774096	0.011683	0.0810847	0.149266	0.162732	0.0141958	0.0340954	0	0	0.0207491	0.00228111	0.023	0.25229	0.98715
TCGA.QK.A8Z7.01	EPHA7-WT	0.0835579	0	0.0791869	0.0585632	0	0	0	0.195239	0.0076265	0	0.0206869	0	0	0.303017	0.0551927	0.167617	0	0	0.0293124	0	0	0	0.023	0.252978	0.988922
TCGA.KK.A8IA.01	EPHA7-WT	0.0673669	0	0.121241	0.159942	0	0.0233033	0	0.124391	0	0	0	0.0289004	0.00737371	0.0639558	0.154366	0.147538	0	0.0065366	0.0950862	0	0	0	0.023	0.251199	0.986717
TCGA.CV.A6JU.01	EPHA7-WT	0	0.0831997	0.0670581	0.0654572	0	0	0.017333	0.126657	0.0278027	0	0.0764209	0	0.0157068	0.0488037	0.0667595	0.325208	0.0227213	0.0479998	0	0.00887229	0	0	0.023	0.251928	0.979856
TCGA.BH.A0E1.01	EPHA7-WT	0.102039	0	0.0323362	0.056384	0	0.107262	0	0.080659	0.0160908	0	0.00904658	0	0.0157522	0.376122	0	0.165249	0	0	0.0390598	0	0	0	0.023	0.251343	0.996017
TCGA.AF.6672.01	EPHA7-WT	0.107366	0.0443044	0.0345863	0.162455	0	0.182784	0	0.145066	0	0	0	0.0137416	0.0237578	0	0.0222133	0.161795	0.0200436	0	0	0.081886	0	0	0.023	0.250546	0.985778
TCGA.66.2789.01	EPHA7-WT	0	0.0384695	0.0802299	0.110265	0	0.0385321	0	0.0353176	0.00310771	0	0.00194417	0.0305785	0.0159609	0.0262548	0.0375739	0.395404	0	0.103831	0.0777758	0	0	0.00475482	0.023	0.251232	0.98104
TCGA.44.7672.01	EPHA7-WT	0.0245614	0.0275146	0.0684282	0.080103	0	0.171613	0.00849647	0.0328769	0.0497188	0	0	0.046372	0.040439	0.0145749	0.0522773	0.306859	0.0154427	0.0205422	0.0381086	0	0	0.00207232	0.023	0.2523	0.977359
TCGA.51.4081.01	EPHA7-WT	0.0792651	0	0.0609407	0.0305945	0.0313044	0.0899192	0	0	0	0	0	0.020444	0	0.434394	0.0108387	0.205127	0.0004	0	0.0367975	0	0	0	0.023	0.251921	1.00852
TCGA.HC.A9TE.01	EPHA7-WT	0.0606643	0.00685138	0.0902543	0.14629	0	0.170706	0	0.0906933	0.0672932	0	0	0	0.0582675	0.0346506	0.0440834	0.177046	0	0.0196506	0.0335487	0	0	0	0.023	0.25296	0.980656
TCGA.AZ.4682.01	EPHA7-WT	0.0843468	0	0.0947368	0.116887	0	0.243011	0.0409143	0.0275793	0.00482567	0	0	0.0325734	0.0280569	0.001	0.00512687	0.284299	0	0.0002	0	0.0364479	0	0	0.023	0.253354	0.98185
TCGA.E2.A1IE.01	EPHA7-WT	0.0825935	0	0.101793	0.0985096	0	0.071239	0	0.0476025	0.00791302	0	0	0.0646471	0.0113706	0.0302997	0.0505995	0.302662	0.0111035	0	0.119668	0	0	0	0.023	0.252328	0.978676
TCGA.CN.A497.01	EPHA7-WT	0.0259263	0	0.113056	0.0595266	0	0.242203	0.00273103	0.145288	0.00111787	0	0.0181005	0.00111116	0.0234951	0.0434335	0.0290581	0.147517	0.00554518	0.0352231	0	0.102569	0	0.00409808	0.023	0.250313	0.98249
TCGA.NH.A5IV.01	EPHA7-WT	0.0655081	0	0.0857248	0.158856	0	0.0295886	0	0.11241	0.00411153	0	0	0.113641	0.013273	0.0528433	0.0208894	0.342258	0	0	0	0	0	0.0009	0.023	0.253055	0.985503
TCGA.CH.5762.01	EPHA7-WT	0.10433	0.0017501	0.0710673	0.107362	0	0.21094	0	0.0920795	0.00605154	0	0	0.0434206	0.0297611	0.0453494	0.053652	0.111815	0.0204602	0	0.0320249	0.0699364	0	0	0.023	0.25126	0.981535
TCGA.D7.A4YU.01	EPHA7-WT	0.0682759	0.0283337	0.0389254	0.104829	0	0.160257	0.0006	0.028995	0.155624	0	0.00638957	0.0152886	0.00757484	0.0374373	0.179488	0.137624	0.00386622	0	0.0264966	0	0	0	0.023	0.252386	0.989832
TCGA.55.A4DF.01	EPHA7-MUT	0.111366	0	0.0350095	0.0757041	0	0.156985	0.0115092	0.0483858	0.02067	0	0.0174893	0	0	0.123106	0.146594	0.23582	0	0	0.0173602	0	0	0	0.023	0.25302	0.984982
TCGA.A2.A3XU.01	EPHA7-WT	0.0369107	0.00952272	0.138821	0.114503	0	0	0	0.176808	0	0	0	0.0482116	0.00507974	0.157182	0.0194251	0.27828	0	0	0	0.0152569	0	0	0.023	0.250898	0.987796
TCGA.G9.6347.01	EPHA7-WT	0.0688633	0	0.0996727	0.221217	0	0	0	0.204732	0.021865	0.00302586	0	0.0749628	0.0107391	0.00250695	0.0145459	0.192261	0	0.00817464	0.0774331	0	0	0	0.023	0.250174	0.98685
TCGA.G2.A2EC.01	EPHA7-WT	0.0616507	0	0.103702	0.110367	0	0.232242	0	0.0526435	0.170802	0	0	0.0355378	0.0300132	0	0.0098469	0.115911	0	0.0343721	0.0429123	0	0	0	0.023	0.250262	0.988241
TCGA.DD.A1EG.01	EPHA7-WT	0.102983	0	0.0605738	0.10074	0	0.141304	0	0.0208091	0.0447116	0	0	0.0312156	0.0458525	0.132956	0.0788632	0.220049	0.00687575	0	0.013066	0	0	0	0.023	0.252648	0.980293
TCGA.50.5045.01	EPHA7-WT	0.0250651	0.042773	0.0460994	0.0953841	0	0.124669	0	0.0793147	0.0434023	0.00787399	0	0	0.0196813	0	0.0685518	0.346391	0.0729744	0.0005	0.0273402	0	0	0	0.023	0.250255	0.97969
TCGA.QG.A5YX.01	EPHA7-WT	0.0521883	0	0.130059	0.0410704	0	0.239312	0	0.0482853	0.0228166	0	0.0055541	0	0	0.0985953	0.00857317	0.251067	0	0.0274492	0	0.0750298	0	0	0.024	0.24542	0.985662
TCGA.A6.A567.01	EPHA7-WT	0.106848	0.0389885	0.0462466	0.118371	0	0.148265	0.00965581	0.0731308	0	0	0.0282459	0	0.00903164	0.0915815	0.0300111	0.27652	0	0	0	0.0231046	0	0	0.024	0.248383	0.983287
TCGA.56.A4BX.01	EPHA7-WT	0	0.0791056	0.0958252	0.128284	0	0.00596762	0	0.0308004	0.00547622	0	0	0.0683891	0.0277548	0	0	0.388841	0.0700622	0.0569437	0.0349302	0	0	0.00761988	0.024	0.246128	0.98412
TCGA.FD.A5BS.01	EPHA7-WT	0.0005	0.0151478	0.0786148	0.269905	0	0	0.014858	0.141542	0.0394276	0	0	0.0441686	0.0183045	0.0528474	0.11062	0.192679	0.00280957	0	0.0185569	0	0	0	0.024	0.239739	0.992098
TCGA.BF.A5ER.01	EPHA7-WT	0.00691262	0.0638241	0	0.0473066	0	0	0	0.151833	0.0315635	0	0	0.0124347	0.0436406	0.256954	0.0259739	0.339165	0	0	0	0.020391	0	0	0.024	0.239067	1.00061
TCGA.CQ.7068.01	EPHA7-WT	0	0	0.0003	0.287979	0	0.00105398	0	0.108594	0.0925167	0	0.0128695	0.0998834	0.0211409	0.0323247	0.167254	0.164356	0.00615469	0	0.00554492	0	0	0	0.024	0.249165	1.00535
TCGA.AR.A24P.01	EPHA7-WT	0.104382	0	0.0625256	0.0426607	0	0.140638	0	0.0500441	0.0002	0	0.00130931	0.00941631	0.0618812	0	0.0479672	0.380199	0.0179775	0	0.0655389	0	0	0.0152642	0.024	0.239594	0.98443
TCGA.BH.A0E6.01	EPHA7-WT	0.060528	0.0688607	0.0238662	0.164587	0	0	0	0.186536	0.0483129	0	0	0.0366234	0.0406776	0.20221	0.0468002	0.0924336	0	0	0.0285639	0	0	0	0.024	0.245437	0.985302
TCGA.VQ.A91Q.01	EPHA7-WT	0.026544	0.0366692	0.105611	0.0368749	0	0.281691	0	0.0104626	0.0652274	0	0	0.0127324	0.0255155	0.0161701	0.0638045	0.188788	0	0.0152326	0	0.108646	0	0.00603014	0.024	0.248595	0.98191
TCGA.13.A5FT.01	EPHA7-WT	0.0869965	0.0709095	0.0352154	0.0131852	0	0.0272734	0	0.170438	0.00611165	0.0104266	0	0.0369506	0.0270901	0.0259569	0.0194755	0.157375	0	0.312596	0	0	0	0	0.024	0.240793	0.995265
TCGA.CI.6622.01	EPHA7-WT	0.0966492	0	0.0858063	0.0593605	0	0.132436	0.0829371	0.00607092	0	0	0.0321505	0.0204638	0.0469063	0.131799	0.00213463	0.268248	0	0	0	0.0350373	0	0	0.024	0.239873	0.985911
TCGA.78.8640.01	EPHA7-WT	0.00954556	0.0241039	0.0871739	0.176693	0	0.0807935	0.0194333	0.0646575	0.0187964	0	0.00990571	0.0415013	0.0162628	0.149208	0.048518	0.22592	0.00486626	0	0	0.0115615	0	0.011029	0.024	0.239949	0.98749
TCGA.A2.A1G4.01	EPHA7-WT	0.096336	0.0235003	0.0552661	0.0943558	0	0.074276	0	0.0770633	0.00863016	0	0	0.0411983	0.0009	0	0.0286469	0.450962	0	0	0.0387283	0.00233895	0	0.00774959	0.024	0.247148	0.98522
TCGA.CD.8526.01	EPHA7-WT	0.173306	0	0.0167106	0.0672745	0	0.259751	0.0108253	0.0945537	0.0435238	0	0.0397488	0	0	0.0737013	0.0439604	0.141692	0	0.0117094	0	0.0232438	0	0	0.024	0.248359	0.986466
TCGA.F4.6809.01	EPHA7-WT	0.0899008	0.0849661	0	0.0903264	0	0.149866	0	0.142621	0.0492981	0	0	0.0141849	0.0113013	0.0579098	0.0644969	0.222214	0	0	0	0.0229147	0	0	0.024	0.248899	0.983715
TCGA.D5.6532.01	EPHA7-WT	0	0.0690345	0.0903166	0.100844	0	0.0952991	0.125222	0	0	0	0	0.0956571	0.0433351	0.150637	0.0575613	0.0822519	0.00184486	0	0.0879959	0	0	0	0.024	0.238689	0.983777
TCGA.XF.A9T3.01	EPHA7-WT	0.0799047	0	0.0542907	0.0531549	0	0.103719	0.017828	0.0429126	0.0221953	0	0.0125163	0.0560568	0.0210548	0.196427	0.0492088	0.237639	0	0	0.0530918	0	0	0	0.024	0.241017	0.985463
TCGA.22.5471.01	EPHA7-WT	0.0452908	0	0.0531459	0.307602	0	0	0.0966454	0.041336	0	0	0	0.0854692	0	0.0573323	0.109964	0.166516	0.0175409	0	0	0.0191585	0	0	0.024	0.246464	0.991947
TCGA.V1.A9OQ.01	EPHA7-WT	0	0.0647891	0.100158	0.22545	0	0.0250251	0	0.150122	0.0261921	0	0	0.109528	0.0273869	0.0242887	0.0193798	0.0937926	0.0040955	0	0.129792	0	0	0	0.024	0.239728	0.992416
TCGA.34.2600.01	EPHA7-WT	0.0962224	0	0.073948	0.0898208	0	0.0367326	0	0.165467	0	0	0	0.0990083	0.0220087	0	0.0544928	0.241899	0.0210619	0.00785918	0	0.0840305	0	0.00744836	0.024	0.242841	0.986013
TCGA.AN.A0FS.01	EPHA7-WT	0.122376	0	0.0571352	0.0531453	0	0.0620917	0	0.0533094	0	0	0	0.0765764	0.0011124	0	0.0106495	0.304428	0.0167732	0	0.217253	0.0222392	0	0.00291053	0.024	0.247661	0.98296
TCGA.AN.A0FX.01	EPHA7-WT	0.11894	0	0.0383401	0.0690955	0	0.0927298	0	0.0389978	0.00583571	0	0	0.00374969	0	0.343023	0.070895	0.200215	0	0	0.0181789	0	0	0	0.024	0.240614	1.0012
TCGA.C8.A275.01	EPHA7-WT	0.0776785	0	0.0500098	0.121464	0	0.124832	0	0.0465887	0.0578856	0.00546813	0	0.0263429	0	0.0890283	0.154371	0.2015	0.0169342	0.0008	0.0237219	0	0	0.00339136	0.024	0.240448	0.990156
TCGA.IQ.A61I.01	EPHA7-WT	0	0.0926564	0.0554227	0.137008	0	0	0.0406963	0.10167	0.081283	0.021209	0	0.0917708	0.00219071	0.0861362	0.0875277	0.0997779	0	0.0897554	0	0	0	0.0128963	0.024	0.245226	0.987886
TCGA.J4.A67K.01	EPHA7-WT	0.0133788	0.0453311	0.105954	0.214963	0	0	0	0.175452	0.005509	0.0121955	0	0.0831934	0.0387099	0.0073542	0.0521775	0.15347	0.0269332	0	0.065377	0	0	0	0.024	0.249357	0.98479
TCGA.98.A53J.01	EPHA7-WT	0.0727834	0	0.0992411	0.0909166	0	0	0	0.141719	0.0138498	0	0.0587553	0	0.0154689	0.05707	0	0.222276	0.0111211	0.0234845	0	0.187923	0	0.00539167	0.024	0.249214	0.985326
TCGA.E9.A1R2.01	EPHA7-WT	0.111631	0	0.0392715	0.161754	0	0.0728885	0	0.106517	0.0530984	0	0	0.0379367	0.00476387	0.00471052	0.106963	0.204091	0.00516985	0	0.0912033	0	0	0	0.024	0.247669	0.982782
TCGA.B6.A0IQ.01	EPHA7-WT	0.0181541	0	0.111725	0.112856	0	0.0619949	0	0.172346	0.0507446	0	0	0.00481491	0	0.0973492	0.121784	0.211883	0.0355483	0	0.0008	0	0	0	0.024	0.238563	0.991255
TCGA.ED.A97K.01	EPHA7-WT	0.0466262	0	0.11649	0.0747188	0	0.0839707	0	0.0491637	0.0267972	0	0	0.0302787	0.0104156	0.213451	0.0278266	0.315568	0	0	0	0	0	0.00469454	0.024	0.245529	0.992761
TCGA.G9.6336.01	EPHA7-WT	0	0.048006	0.120197	0.195936	0	0.0336751	0	0.194883	0	0	0	0.04863	0.00911436	0	0.04277	0.215371	0.0618414	0	0.0274211	0.00215482	0	0	0.024	0.245058	0.986412
TCGA.V1.A8MG.01	EPHA7-MUT	0.0347117	0	0.145826	0.179945	0	0.176758	0	0.142921	0.00960444	0	0	0.095969	0.0153061	0	0.0604789	0.0768086	0.0028036	0	0.0588688	0	0	0	0.024	0.241882	0.999972
TCGA.BT.A20W.01	EPHA7-WT	0.173923	0	0.017268	0.145614	0	0.111069	0	0.147964	0.074586	0	0	0.0608815	0.0120617	0	0.0480785	0.136199	0.0188634	0.0195125	0.0339799	0	0	0	0.024	0.242265	0.990689
TCGA.62.A46R.01	EPHA7-WT	0.0721854	0	0.0523939	0.0907527	0	0.153746	0.00268854	0.0201519	0.0186835	0	0	0.028181	0.1074	0.0144148	0.0088521	0.247939	0.00215762	0.0516751	0.128778	0	0	0	0.024	0.24465	0.977482
TCGA.NC.A5HF.01	EPHA7-MUT	0	0.0437505	0.108385	0.0009	0	0	0	0.229902	0	0	0.0474754	0.0172095	0.0423324	0.0923824	0	0.230772	0.0449786	0.0342122	0.107738	0	0	0	0.024	0.247124	0.979314
TCGA.56.1622.01	EPHA7-WT	0.0983499	0	0.0743833	0.0764503	0	0.0138393	0	0.0507887	0.0002	0	0.0543725	0	0.0182552	0.100801	0.00838527	0.122665	0	0.159551	0	0.202588	0	0.0193544	0.024	0.246039	0.989425
TCGA.24.1469.01	EPHA7-WT	0.0593595	0.0125195	0.100551	0.0513878	0	0.0976066	0	0.0847878	0.0254738	0	0	0.0188755	0	0.229047	0.0546279	0.22334	0	0	0	0.0424225	0	0	0.024	0.248646	0.987889
TCGA.56.A4ZK.01	EPHA7-WT	0.0474324	0	0.0697788	0.058081	0	0.0685713	0.00777999	0.0355196	0.00847347	0	0	0.0303247	0.00407222	0.212643	0.129292	0.260062	0	0	0	0.0664606	0	0.00150942	0.024	0.241816	0.996368
TCGA.L5.A4OX.01	EPHA7-WT	0.0886729	0	0.0722977	0.174595	0	0.124844	0.0210172	0.0882043	0.0275825	0	0	0.0544884	0.0142758	0	0.0392553	0.150995	0	0.0930849	0.0506874	0	0	0	0.024	0.240096	0.986778
TCGA.Y6.A9XI.01	EPHA7-WT	0	0.0623927	0.101862	0.0868754	0	0.106071	0	0.0855894	0.00369085	0	0	0.0684063	0.064224	0.0191337	0.0271612	0.183943	0.00520246	0.0005	0.184908	0	0	0	0.024	0.247692	0.978734
TCGA.80.5608.01	EPHA7-WT	0.0592504	0	0.0870372	0.149181	0	0.043144	0.0117128	0.140663	0	0	0	0.110765	0.0245502	0.0512831	0.0204064	0.197046	0	0.024221	0.060016	0	0	0.0207239	0.024	0.248681	0.98179
TCGA.KK.A8IB.01	EPHA7-WT	0.164005	0	0.0408532	0.139473	0	0.117875	0	0.0952423	0.0204803	0	0	0.119158	0.0561729	0.0132558	0.0104331	0.159445	0	0.00638938	0.0440708	0.013146	0	0	0.024	0.24799	0.98696
TCGA.VQ.A925.01	EPHA7-WT	0.0930497	0	0.0891697	0.167881	0	0.232803	0	0.0772196	0.0017561	0	0	0.0953226	0.0196588	0.00212589	0.0340595	0.135332	0	0.00601858	0.0456028	0	0	0	0.024	0.249869	0.990239
TCGA.B6.A0RT.01	EPHA7-MUT	0.059404	0.0423511	0.0128885	0.34243	0	0.139274	0.00288155	0.059274	0.067881	0	0	0.0274845	0.0097328	0.0410459	0.0922728	0.0763729	0	0	0.026707	0	0	0	0.024	0.249644	0.998921
TCGA.AQ.A54O.01	EPHA7-WT	0.105727	0	0.0624956	0.0906092	0	0.0231316	0	0.148266	0.0231051	0	0	0	0	0.274666	0.0497012	0.210228	0.00672055	0	0.00534986	0	0	0	0.024	0.248956	0.990753
TCGA.E2.A3DX.01	EPHA7-WT	0.0270226	0.112227	0	0.375247	0	0.12562	0	0.0143984	0.00472309	0	0	0.0423954	0.0161096	0.00560805	0.0433156	0.128615	0.0176738	0	0.0870442	0	0	0	0.024	0.240612	0.996211
TCGA.55.8512.01	EPHA7-WT	0.0471368	0	0.0962075	0.127867	0	0.0242325	0	0.0507746	0	0	0	0.0683694	0.128362	0.0675187	0	0.26925	0	0.0696749	0.0195981	0	0	0.0310083	0.024	0.245417	0.982375
TCGA.HC.7081.01	EPHA7-WT	0.098133	0	0.0679808	0.0531889	0	0.154721	0.0201218	0	0	0	0	0.0320332	0.0290106	0.0298645	0.0294152	0.326695	0.0506847	0	0.108151	0	0	0	0.024	0.240663	0.981616
TCGA.D8.A27L.01	EPHA7-WT	0.0603834	0	0.0598734	0.058348	0	0.132213	0	0.0442015	0.0312893	0	0	0.0274853	0.0185039	0.0200246	0.0632745	0.196502	0.0610978	0	0.226804	0	0	0	0.024	0.241962	0.979772
TCGA.05.4426.01	EPHA7-WT	0.129646	0	0.0340625	0.0634465	0	0.0770134	0.0153012	0.01992	0.0478121	0	0.0137008	0	0.0348621	0.106267	0.0116653	0.370641	0	0	0	0.0478762	0	0.0277851	0.024	0.24035	0.988947
TCGA.VQ.AA64.01	EPHA7-WT	0.138173	0	0.0552589	0.0908967	0	0.166079	0	0.110718	0.0102217	0	0	0.068486	0.00964927	0.0344119	0.105003	0.173743	0	0.00288144	0.0344776	0	0	0	0.024	0.24346	0.987474
TCGA.AC.A2FF.01	EPHA7-WT	0.031708	0.0148189	0.0685196	0.132741	0	0.186084	0	0.0260455	0.0127914	0.018502	0	0.0185001	0.00100413	0	0.0723507	0.161428	0.0844713	0	0.171035	0	0	0	0.024	0.244847	0.979616
TCGA.QG.A5YV.01	EPHA7-WT	0.0303653	0.0160267	0.109101	0.122502	0	0.1076	0	0.0777757	0.062466	0	0.00846756	0.005497	0.0246968	0.0894012	0.0618111	0.247246	0	0.00120741	0	0.0358354	0	0	0.024	0.238864	0.986656
TCGA.O2.A52Q.01	EPHA7-WT	0	0.0167038	0.0140949	0.0963129	0	0.0436349	0.060894	0.0467445	0.0152679	0	0	0.026974	0.00661226	0.23472	0.110255	0.322845	0	0	0.00494032	0	0	0	0.024	0.246542	0.996301
TCGA.EE.A29T.06	EPHA7-WT	0	0.0397913	0.0789334	0.16024	0	0	0.0153999	0.0527974	0.0196092	0	0	0.0656912	0.00147233	0.134521	0.0288956	0.363135	0.00220574	0	0.0337115	0	0	0.00359665	0.024	0.239717	0.990022
TCGA.2Y.A9H3.01	EPHA7-WT	0	0.0413899	0.0718827	0.221916	0	0.0313038	0	0.0530767	0.0732514	0	0	0.0449624	0.051459	0	0.0481533	0.166168	0.00665077	0	0.189787	0	0	0	0.024	0.242234	0.982266
TCGA.77.8131.01	EPHA7-WT	0.0515493	0	0.0581928	0.0852425	0	0.0810896	0	0.100665	0.0406756	0	0.028288	0.0081483	0.0592982	0.221873	0.041849	0.183961	0.00908482	0.00385721	0	0.0262256	0	0	0.024	0.241986	0.986336
TCGA.20.1686.01	EPHA7-WT	0.00748106	0.0323995	0.111955	0.0918749	0	0.0883678	0	0.0349158	0.10054	0	0	0.0187674	0.0915129	0.134759	0.0351817	0.0943579	0	0	0.157887	0	0	0	0.024	0.242544	0.980222
TCGA.44.5645.01	EPHA7-WT	0.118496	0	0.0234244	0.0345093	0	0.344696	0.0189896	0	0	0	0.0217925	0	0.0635393	0	0.0190649	0.169768	0.120819	0.0112489	0.053652	0	0	0	0.024	0.242651	0.980227
TCGA.61.1911.01	EPHA7-WT	0.086419	0	0.0668673	0.250415	0	0.112558	0	0.0638358	0.0578071	0	0	0.0902497	0.0157732	0	0.0788001	0.16645	0.00476402	0	0	0.00606094	0	0	0.024	0.246548	0.994117
TCGA.MX.A5UJ.01	EPHA7-WT	0.081309	0.0883437	0.0066781	0.0772698	0	0.232616	0	0.123592	0.0103836	0	0	0.0591206	0.054552	0	0.0789551	0.132882	0	0.00651173	0.0267209	0.021066	0	0	0.024	0.2402	0.988432
TCGA.HD.8314.01	EPHA7-WT	0.042817	0	0.0794854	0.0536218	0	0.027185	0	0.0344382	0.0724023	0	0	0	0	0.191678	0.0545116	0.409943	0.0009	0	0.0329911	0	0	0	0.024	0.2493	0.993646
TCGA.EE.A3JH.06	EPHA7-WT	0.0394477	0.00714259	0.0579126	0.211034	0	0	0.0431112	0.0470604	0.0826758	0	0	0.040363	0.0687375	0.129683	0.0797217	0.144092	0.0164825	0	0.0325357	0	0	0	0.024	0.246234	0.980959
TCGA.AQ.A54N.01	EPHA7-WT	0	0.113389	0.0613486	0.257158	0	0	0	0.266296	0.00515396	0	0	0	0.0294744	0.0166921	0.0721996	0.115192	0.00201064	0	0.061085	0	0	0	0.024	0.241561	0.993396
TCGA.CV.7424.01	EPHA7-WT	0.0354369	0	0.0798902	0.14731	0	0.130525	0.00617558	0.0276515	0.0328425	0	0	0.0436058	0	0.0821962	0.0941266	0.232938	0.00365412	0	0.0776156	0	0	0.00603135	0.024	0.23926	0.98469
TCGA.4Z.AA87.01	EPHA7-WT	0.0093608	0.0235656	0.101493	0.279635	0	0	0.0411721	0	0.0194025	0.00603073	0	0.0372664	0.0434562	0	0.107225	0.240797	0.00975826	0	0	0.0808368	0	0	0.024	0.242166	0.988995
TCGA.AO.A03P.01	EPHA7-WT	0.103054	0	0.0660529	0.0270972	0	0.00261766	0	0.0916541	0.016605	0.00235494	0	0.010572	0	0.193515	0.0403887	0.397869	0	0	0.0482197	0	0	0	0.024	0.238847	0.99829
TCGA.HU.A4GP.01	EPHA7-WT	0.0798508	0.104888	0	0.128962	0	0.164576	0.00476614	0.086905	0.0152164	0	0	0.00866877	0.0517431	0.0123727	0.0216259	0.21051	0.0241254	0.0273332	0	0.0584576	0	0	0.024	0.248941	0.980599
TCGA.A2.A3XS.01	EPHA7-WT	0.0375388	0.103756	0.016707	0.101413	0	0.131737	0	0.149437	0.0606268	0	0.0235058	0	0.0364873	0.0486394	0.0602372	0.1965	0.00398988	0	0.0294248	0	0	0	0.024	0.24227	0.984336
TCGA.CA.5796.01	EPHA7-WT	0.0492328	0	0.114275	0.0969864	0	0.357901	0	0.00420494	0.0774217	0	0	0.0311192	0.014328	0.0255409	0.00915826	0.172325	0.0165249	0.00191588	0	0.0290656	0	0	0.024	0.248711	0.988857
TCGA.GM.A5PX.01	EPHA7-WT	0.100737	0	0.0650091	0.10039	0	0.134822	0	0.0847781	0	0	0	0.0855349	0.0001	0	0.0210378	0.273802	0	0.00203992	0.131772	0	0	0	0.024	0.247811	0.98083
TCGA.GC.A6I1.01	EPHA7-WT	0	0.00644947	0.0644824	0.158661	0	0	0.0534198	0.064907	0.0491268	0	0	0.0442303	0	0.214061	0.0661134	0.213289	0	0	0	0.0614055	0	0.00385393	0.024	0.245977	0.987533
TCGA.CV.7255.01	EPHA7-WT	0.0963786	0	0.053575	0	0	0.0334017	0	0.0534767	0.00141076	0	0	0.048117	0	0.600837	0.0228216	0.0524696	0.0003	0	0.0287798	0	0	0.00845607	0.024	0.246175	1.03482
TCGA.AN.A0AS.01	EPHA7-WT	0.00393346	0.0141284	0	0	0	0.0158136	0	0.0330226	0.0356055	0	0.0405557	0	0	0.566946	0.00826156	0.246204	0.00250215	0	0.0281815	0	0	0.00484566	0.024	0.245245	1.05052
TCGA.D8.A4Z1.01	EPHA7-WT	0.0397404	0.021665	0.0733268	0.134382	0	0.0935256	0	0.121255	0.0212046	0	0.021198	0.0178087	0.021759	0	0.0399767	0.23075	0.00149331	0	0.161791	0.0001	0	0	0.024	0.249331	0.97858
TCGA.D7.6518.01	EPHA7-WT	0.0456979	0	0.0952456	0.0399863	0	0.224906	0	0.0836671	0.0493841	0	0	0.0311584	0.0208964	0.0913067	0.10799	0.162451	0.0130005	0	0.0180963	0.0140497	0	0.00216428	0.024	0.24249	0.985345
TCGA.PL.A8LY.01	EPHA7-WT	0.0394778	0	0.116766	0.171164	0	0	0	0.17312	0.0322933	0	0	0.069913	0.0301598	0.0106004	0	0.335792	0	0.00964457	0.0110694	0	0	0	0.024	0.249334	0.986208
TCGA.CR.6487.01	EPHA7-WT	0.0198001	0.0140532	0.0752824	0.357202	0	0.057446	0.0342481	0.0536829	0.0525537	0	0	0.0522181	0.0201232	0.00216631	0.113553	0.135625	0.00707582	0.0001	0.00487302	0	0	0	0.024	0.247017	0.998167
TCGA.HD.7754.01	EPHA7-WT	0.0514628	0	0.0909252	0.0855412	0	0.0849054	0.00558348	0.0351193	0.0106556	0	0.0377659	0	0.0217335	0.210344	0	0.236544	0.0215631	0.0465418	0	0.0528838	0.0002	0.00820734	0.024	0.242018	0.98843
TCGA.C8.A130.01	EPHA7-WT	0.0966291	0	0.0521692	0.178738	0	0.0773394	0	0.0727004	0.0190823	0	0	0.0315233	0	0.0545252	0.0769031	0.235299	0.00310658	0	0.101984	0	0	0	0.024	0.245559	0.981285
TCGA.E2.A1B4.01	EPHA7-WT	0.0702571	0	0.0915275	0.0480701	0	0.123292	0	0.0930659	0.01764	0.0136518	0	0.0353418	0.0109063	0	0.0346381	0.336411	0	0.025754	0.0981862	0	0	0.00125804	0.024	0.239118	0.982919
TCGA.LL.A73Z.01	EPHA7-WT	0.120769	0	0.020762	0.0824842	0	0.11049	0	0.117082	0.0774178	0.00860781	0	0	0.00784061	0.00101256	0.177223	0.218978	0.00306619	0	0.0542666	0	0	0	0.024	0.246227	0.990283
TCGA.VQ.AA68.01	EPHA7-WT	0.187544	0	0	0.107284	0	0.186417	0.0242691	0.0550443	0.073425	0	0	0.0428512	0.00197292	0.024603	0.0453066	0.144374	0	0.00921893	0.0976906	0	0	0	0.024	0.241638	0.985856
TCGA.GD.A76B.01	EPHA7-MUT	0	0.0605702	0.0759795	0.133553	0	0.045694	0.0237802	0.137761	0.0736811	0	0.00286095	0.0109412	0.0215185	0	0.136134	0.241034	0.0169733	0.00767637	0.0118441	0	0	0	0.024	0.246103	0.986313
TCGA.A7.A56D.01	EPHA7-WT	0.00263224	0.0227671	0.0958352	0.048338	0	0	0	0.0884844	0.0634523	0	0	0.037789	0.0382295	0.236558	0.00977758	0.273236	0	0.0303358	0.0446019	0.00796352	0	0	0.024	0.245467	0.989061
TCGA.DY.A0XA.01	EPHA7-WT	0.022504	0.0253329	0.119787	0.146703	0	0.081094	0	0.0761113	0.0242241	0	0	0.00506398	0.032871	0.266681	0.033727	0.100445	0	0	0	0.0654559	0	0	0.024	0.24643	0.989443
TCGA.E7.A8O7.01	EPHA7-WT	0	0.0426871	0.103635	0.125596	0.0435924	0	0	0.106858	0.0749075	0.00356419	0.0167283	0	0.0229586	0	0.00407902	0.169681	0.0574063	0.0960316	0	0.101457	0	0.0308178	0.024	0.248776	0.978372
TCGA.KK.A8IH.01	EPHA7-WT	0.117641	0.0253249	0.0531502	0.0544411	0	0.244779	0	0.141837	0	0	0	0.0194795	0.0157142	0.0345815	0.0640239	0.166395	0	0.01832	0.0443135	0	0	0	0.024	0.24049	0.987016
TCGA.56.6545.01	EPHA7-WT	0.0415025	0	0.0809364	0.0367691	0	0.201891	0	0	0	0	0.0204837	0.00542315	0	0.260112	0.0885191	0.243544	0	0	0.0165518	0	0	0.00426713	0.024	0.240306	0.995218
TCGA.69.7973.01	EPHA7-WT	0.051922	0.0002	0.0960167	0.0955586	0	0.202012	0	0.0584964	0.00411891	0	0	0.0194487	0.027865	0	0.0229006	0.35654	0	0.0118313	0.0485969	0	0	0.00450971	0.024	0.247547	0.982082
TCGA.22.4613.01	EPHA7-WT	0.0152556	0.014811	0.0804591	0.103533	0	0.0493647	0.0111784	0.102775	0.0163479	0	0	0.0481865	0.0159258	0.0112001	0.0977413	0.417283	0.00250933	0	0	0.00895508	0	0.00447338	0.024	0.246689	0.987081
TCGA.38.A44F.01	EPHA7-WT	0	0.104912	0.0165577	0.0720738	0	0.109956	0	0.139247	0.0193362	0	0	0.0367754	0.0214857	0.00883833	0.0986042	0.276578	0.0413924	0	0.0542441	0	0	0	0.024	0.240069	0.982932
TCGA.24.1548.01	EPHA7-WT	0	0.123914	0.039917	0.0840375	0	0.179459	0	0.0881251	0.0315026	0	0	0.103191	0.0710708	0.0169243	0.0632209	0.156043	0	0	0.0425957	0	0	0	0.024	0.238887	0.985848
TCGA.E2.A15L.01	EPHA7-WT	0.066615	0	0.11208	0.00725026	0	0.101836	0	0.0429078	0.00474267	0	0	0.0123305	0	0.0728115	0.032711	0.423734	0	0	0.109475	0	0	0.0135058	0.024	0.245967	0.987994
TCGA.86.8673.01	EPHA7-WT	0	0.0507496	0.0872197	0.151531	0	0	0	0.0934431	0.0375908	0	0	0.0367729	0.0006	0.231162	0.042259	0.262591	0	0	0.00603284	0	0	0	0.024	0.244096	0.990988
TCGA.A2.A259.01	EPHA7-WT	0.0612938	0.0693137	0	0.0449472	0	0.165642	0.00951108	0.017134	0.0208762	0	0.0157832	0	0.0599343	0.00184379	0.0698887	0.152707	0	0	0.308066	0	0	0.00305861	0.024	0.24357	0.984271
TCGA.D8.A27F.01	EPHA7-WT	0.14389	0	0.041195	0.0249589	0.00573894	0.00580428	0	0.0264216	0.0007	0	0.0104645	0	0	0.455904	0.0132683	0.256795	0	0	0	0.0148607	0	0	0.024	0.243857	1.02758
TCGA.DC.6160.01	EPHA7-WT	0	0.0221385	0.117399	0.0594069	0	0.205937	0.0588999	0.0866567	0.0550784	0	0	0.00495312	0	0.116347	0.0487945	0.173335	0.0119437	0.00362849	0.0354819	0	0	0	0.024	0.247509	0.982099
TCGA.C8.A1HO.01	EPHA7-WT	0.0564587	0	0.100755	0.07876	0	0.108929	0	0.0595796	0	0	0	0.0711923	0	0.0867426	0.07719	0.260127	0	0	0.0927183	0	0	0.00754848	0.024	0.245754	0.981909
TCGA.50.5066.01	EPHA7-WT	0	0.0847868	0.0367283	0.162907	0	0	0.0801667	0.090155	0	0.0364296	0	0.0846828	0	0.0203089	0.0755442	0.243478	0.0277457	0	0.0518598	0	0	0.00520631	0.024	0.24919	0.981087
TCGA.85.6560.01	EPHA7-WT	0.0678268	0	0.0583359	0.125802	0	0.0763879	0.0190934	0.0225969	0	0	0	0.0319776	0.0172202	0.125217	0.0862249	0.353548	0.00894942	0	0	0.0064782	0	0.0003	0.024	0.249966	0.986314
TCGA.AR.A2LJ.01	EPHA7-WT	0.0580024	0	0.0597549	0.0845609	0	0.0168522	0	0.064226	0.0450437	0	0.050638	0	0.0441341	0.209823	0.0516531	0.275473	0.00893229	0	0.0309064	0	0	0	0.024	0.242916	0.987666
TCGA.NC.A5HJ.01	EPHA7-WT	0.0755553	0	0.043486	0.185896	0	0.133322	0.00648882	0.0396027	0.0127069	0	0	0.0708523	0.0365123	0.0249124	0.0781737	0.235301	0.00326745	0	0.0500893	0	0	0.00383361	0.024	0.239335	0.985988
TCGA.BA.A6DB.01	EPHA7-WT	0.0994053	0	0.0163974	0.197827	0	0.0773059	0.0111086	0.113275	0.0268653	0	0	0.0332767	0	0.0779119	0.102348	0.184424	0.0326943	0	0.0271598	0	0	0	0.024	0.238561	0.98834
TCGA.97.7554.01	EPHA7-WT	0.0008	0.0227922	0.105161	0.0585241	0	0.137146	0	0.0151631	0.0179374	0	0	0.0164073	0.00322121	0.0905983	0.0560961	0.43128	0	0	0.0366795	0	0	0.00819494	0.024	0.249387	0.987414
TCGA.BH.A0E9.01	EPHA7-WT	0.0906017	0	0.0617676	0.173086	0	0.20035	0	0.0396057	0.00565395	0	0	0.0533628	0.0269511	0	0.0184477	0.217799	0.0001	0	0.112312	0	0	0	0.024	0.240802	0.985299
TCGA.HF.7132.01	EPHA7-WT	0.0116082	0.128992	0.00919659	0.149206	0	0.238252	0	0.0752542	0.0735283	0	0	0.0623533	0.0201644	0.00957575	0.0456667	0.131821	0.00928382	0	0.0350971	0	0	0	0.024	0.243733	0.990602
TCGA.BB.7861.01	EPHA7-WT	0.0518951	0.0407011	0.0169255	0.159519	0	0.0847306	0.104176	0.0518649	0.0418884	0	0.0642297	0	0	0.0839591	0.169189	0.100804	0.0152573	0	0.010381	0.00447906	0	0	0.024	0.242886	0.992133
TCGA.B5.A5OD.01	EPHA7-WT	0	0.0633335	0.0824898	0.089704	0	0	0	0.036108	0.0595925	0.00959803	0.0219779	0	0.0284392	0.165428	0.00680562	0.355181	0	0	0	0.0813424	0	0	0.024	0.2431	0.991754
TCGA.B5.A3FH.01	EPHA7-WT	0.00699475	0	0.118457	0.0439562	0	0	0.00147313	0.151348	0.038341	0	0.0129102	0	0	0.305403	0.038751	0.214906	0.00194125	0	0	0.0309006	0	0.0346175	0.024	0.239581	0.999596
TCGA.YL.A8SQ.01	EPHA7-WT	0.0661991	0.0591674	0.0577391	0.0817919	0	0.167021	0	0.0967781	0	0	0	0.0654118	0.0113779	0	0.0364491	0.178667	0	0	0.179398	0	0	0	0.024	0.249248	0.979903
TCGA.96.7544.01	EPHA7-WT	0.0534142	0	0.0790504	0.0606108	0	0.186484	0.00597799	0	0	0	0	0.00821345	0.0141477	0.0300176	0.0998499	0.362979	0.0563045	0	0.0309339	0	0	0.0120167	0.024	0.248417	0.98333
TCGA.FS.A1ZA.06	EPHA7-MUT	0.0744011	0	0.0716133	0.147853	0	0	0	0.139206	0.0135394	0	0	0.0552962	0.0268987	0.170124	0.126887	0.14715	0.00111305	0	0.0259175	0	0	0	0.024	0.245489	0.98747
TCGA.AN.A0FK.01	EPHA7-WT	0.0804226	0	0.0734253	0.0710587	0	0	0	0.0437334	0.0540401	0	0	0.0240493	0	0.229824	0.0588465	0.331067	0	0	0.0335335	0	0	0	0.024	0.239176	0.996296
TCGA.18.3407.01	EPHA7-MUT	0.00769862	0.00592267	0.109896	0.0913557	0	0.188765	0	0.0199814	0	0	0.00836027	0	0.00560678	0.0923319	0.0355921	0.319764	0	0.0627027	0	0.0374576	0	0.0145648	0.024	0.244919	0.985226
TCGA.FS.A1ZZ.06	EPHA7-WT	0	0.156818	0.0233845	0.133283	0	0	0	0.173526	0.0383579	0.00151347	0	0.0213955	0.00777116	0.0968698	0.0692137	0.123564	0	0	0.154303	0	0	0	0.024	0.245767	0.980516
TCGA.AX.A05W.01	EPHA7-WT	0	0.00742411	0.0864748	0.0493867	0	0.00442914	0	0.101185	0.0185684	0.00925543	0	0.0228467	0.0224312	0.32604	0.0235586	0.322145	0.00260226	0	0	0.00365319	0	0	0.024	0.239154	1.0088
TCGA.C4.A0EZ.01	EPHA7-WT	0	0.126915	0.0476699	0.134587	0	0.0393321	0.0002	0.130939	0.0522419	0	0.0201085	0	0.0226134	0.0994416	0	0.244245	0.0376171	0.00622218	0.0378564	0	0	0	0.024	0.240137	0.984258
TCGA.CV.A6JD.01	EPHA7-WT	0	0.0741452	0	0.174703	0	0	0	0.0908095	0.0234314	0	0	0.0378989	0.00529256	0.0697883	0.138797	0.260424	0.0966565	0.00262552	0.0254285	0	0	0	0.024	0.243797	0.987266
TCGA.CX.7219.01	EPHA7-WT	0.0895554	0	0.0677768	0.0310488	0	0.105575	0.0467878	0.0531947	0.00970915	0	0.0743446	0	0	0.227756	0.041225	0.129851	0.00172699	0	0	0.10619	0	0.0152589	0.024	0.247964	0.984707
TCGA.59.2354.01	EPHA7-WT	0.109491	0	0.0421579	0.0669886	0	0.145968	0	0.0525246	0.0596818	0	0	0.0545711	0.00940203	0.127386	0.04983	0.276801	0.00157564	0	0.00362189	0	0	0	0.024	0.240328	0.986673
TCGA.92.8064.01	EPHA7-WT	0.0329188	0	0.0783954	0.288466	0	0.0540218	0.0352996	0.0617717	0.0216331	0	0	0.108861	0.0123005	0.0181726	0.0842886	0.148409	0	0.00338059	0.0520596	0	0	0	0.024	0.241837	0.994855
TCGA.AX.A3G6.01	EPHA7-WT	0	0.0358127	0.0983177	0.0680963	0	0	0	0.0550581	0.0294221	0	0	0.0251167	0.0396487	0.141681	0.0107236	0.322659	0.00953054	0.0223244	0	0.14161	0	0	0.025	0.229729	0.998509
TCGA.ER.A19S.06	EPHA7-WT	0	0.073798	0.0326149	0.355303	0	0	0.0172175	0.0827153	0.0688378	0.00351435	0	0.0951286	0	0.100493	0.0583107	0.0890494	0	0	0.0230175	0	0	0	0.025	0.232195	1.00451
TCGA.29.1769.01	EPHA7-WT	0	0.119086	0.043249	0.15466	0	0	0	0.0541577	0.00642002	0.0479741	0	0.0810014	0.0466879	0	0.0686462	0.353775	0	0.0009	0	0.0114252	0	0.0119847	0.025	0.23185	0.992984
TCGA.CR.7395.01	EPHA7-WT	0.0245628	0	0.0708952	0.121487	0	0.109391	0.100762	0.0686542	0.0260825	0	0.027985	0.00930035	0	0.0973572	0.0865982	0.20818	0	0.0295442	0	0.00779131	0	0.0114089	0.025	0.233194	0.987611
TCGA.G4.6311.01	EPHA7-WT	0.189327	0	0	0.0221837	0	0.0756162	0.0127014	0.0183583	0.021827	0	0.0905474	0	0	0.305893	0.010076	0.141433	0	0	0	0.112036	0	0	0.025	0.232853	1.00205
TCGA.BH.A18R.01	EPHA7-WT	0.0760987	0	0.061184	0.0694616	0	0.157172	0	0.0700799	0.00448948	0	0	0.0314671	0.0114629	0.0268047	0.0711323	0.260315	0.0591647	0	0.101168	0	0	0	0.025	0.233229	0.983288
TCGA.AC.A4ZE.01	EPHA7-WT	0.0600623	0	0.0877683	0.155722	0	0.153276	0	0.0461508	0	0	0	0.0499672	0.0163734	0	0.0380904	0.192471	0	0	0.200035	0	0	0.0001	0.025	0.237507	0.985544
TCGA.L5.A4OI.01	EPHA7-WT	0.0732108	0.0139215	0.0854518	0.0908681	0	0.154692	0	0.0573747	0.064679	0	0.00172857	0.0315707	0.010702	0.0822759	0.0382499	0.249839	0	0.0250498	0.0152831	0	0	0.00510306	0.025	0.235538	0.986954
TCGA.D3.A8GQ.06	EPHA7-WT	0.0846682	0	0.0656168	0.11477	0	0.0138653	0.0134264	0.0981749	0	0.00400555	0	0.00772101	0	0.386838	0.021539	0.155852	0	0	0	0.0335227	0	0	0.025	0.229155	1.00982
TCGA.69.8254.01	EPHA7-WT	0.012532	0.0353103	0.0805131	0.0722603	0	0.200257	0	0.0560963	0.00253677	0	0	0.00457044	0.0134562	0	0.109381	0.389605	0.0063103	0	0.00639096	0.00873681	0	0.00204396	0.025	0.232303	0.992907
TCGA.69.7979.01	EPHA7-WT	0.0653836	0	0.0917392	0.0720395	0	0.0254875	0	0.0309062	0.00979799	0	0.0347989	0.0393614	0.0180183	0.0972016	0.0931108	0.380837	0.00639297	0	0.0221867	0	0	0.0127388	0.025	0.229971	0.996746
TCGA.60.2714.01	EPHA7-WT	0	0.0670496	0.0559101	0.127237	0	0.079139	0.0212382	0.066238	0	0	0	0.0687117	0.0320127	0.0206001	0.0859668	0.303103	0.00267036	0.0270112	0.0431119	0	0	0	0.025	0.231348	0.987793
TCGA.CV.6942.01	EPHA7-WT	0	0.045813	0.0554578	0.187923	0	0.0437733	0.0118281	0.0661627	0.0121525	0	0	0.0961787	0.0112176	0.0899774	0.11036	0.221553	0.00124337	0.00440316	0.0173854	0.0245712	0	0	0.025	0.230428	0.994524
TCGA.EY.A549.01	EPHA7-WT	0.0644953	0	0.104256	0.084095	0	0.141882	0	0.205929	0	0	0	0.0462698	0.0148463	0.0967975	0.0538082	0.163149	0	0.0044058	0	0.0200655	0	0	0.025	0.23606	0.991108
TCGA.31.1950.01	EPHA7-WT	0.0420462	0.00865979	0.0973367	0.0694491	0	0.136891	0.00105217	0.112045	0.0333015	0	0.0100845	0.010407	0.0432571	0	0.0872908	0.26243	0	0.0840578	0	0.0010351	0	0.0007	0.025	0.228935	0.991656
TCGA.YD.A9TB.06	EPHA7-WT	0.103089	0	0.0507848	0.149591	0	0.0902978	0.016804	0.0464834	0.00233025	0	0	0.0644842	0.0414732	0	0.0635261	0.335285	0.00240559	0	0.0334463	0	0	0	0.025	0.233296	0.988185
TCGA.EI.6884.01	EPHA7-WT	0	0.020631	0.106103	0.0997054	0	0.197421	0	0.0636359	0.00231976	0	0	0.0460889	0	0.0581116	0.0743273	0.243803	0.0144024	0	0.0681689	0	0	0.00528177	0.025	0.231474	0.987774
TCGA.CN.6017.01	EPHA7-WT	0.00737225	0.024058	0.0605794	0.265546	0	0.027924	0	0.0525607	0.0621755	0	0	0.0407254	0.0479058	0.00217611	0.126497	0.240441	0.00982014	0.00951592	0.0227032	0	0	0	0.025	0.238138	0.991371
TCGA.05.4402.01	EPHA7-WT	0.0369058	0	0.0778402	0.0499019	0	0.0567366	0	0.0493298	0.0285427	0	0	0.0220684	0.00582306	0.0217455	0.0382376	0.487223	0.00476658	0.0293521	0.058215	0	0	0.0333117	0.025	0.229878	0.994421
TCGA.90.A4EE.01	EPHA7-WT	0.0511198	0	0.0637062	0.195742	0	0.170666	0.0303453	0.0526748	0.0250661	0	0	0.0546383	0.0426381	0.0666248	0.0941286	0.126152	0.0168742	0	0.00662056	0.00300232	0	0	0.025	0.236407	0.991031
TCGA.BR.8484.01	EPHA7-WT	0.0968257	0	0.0373231	0.121663	0	0.171351	0.0208164	0.0674846	0.0391261	0	0	0.0326157	0	0.0324991	0.0888077	0.267215	0.010104	0	0.00182874	0.00871944	0	0.00362054	0.025	0.229589	0.991407
TCGA.49.4514.01	EPHA7-WT	0.085627	0	0.0455747	0.262511	0	0.00373382	0.0421444	0.133785	0.0510042	0	0	0.0519782	0.0267172	0.0152364	0.0557514	0.194172	0.0003	0.0173153	0.00682652	0.00328615	0	0.00405982	0.025	0.23109	0.993963
TCGA.G4.6293.01	EPHA7-WT	0	0.0212322	0.121922	0.0998937	0	0.304892	0	0.0365203	0.0765686	0	0	0.0402543	0	0.0595686	0.059512	0.142456	0	0.00211917	0.0308635	0	0	0.00419709	0.025	0.227863	0.996621
TCGA.56.7822.01	EPHA7-WT	0.0864855	0	0.0675681	0.0598206	0	0.0900161	0	0.0254984	0.0106431	0	0	0.0452367	0.0183957	0.0302833	0.00259527	0.453925	0.0268658	0.0243993	0.0391684	0	0	0.019099	0.025	0.238359	0.989768
TCGA.B5.A3FC.01	EPHA7-WT	0	0.0736522	0.0475834	0.0763638	0	0.0306853	0.0645176	0.0743581	0.0224964	0.0539919	0	0.156257	0	0.0556372	0.0245704	0.291202	0.00948217	0	0.0192022	0	0	0	0.025	0.22837	0.997439
TCGA.50.5944.01	EPHA7-WT	0.0993326	0	0.0440061	0.0343496	0	0.0911682	0	0.0242811	0.00194338	0	0	0.00677716	0.0276731	0.037603	0.0206831	0.477931	0.0017376	0.00479328	0.127205	0	0	0.0005	0.025	0.231806	0.994273
TCGA.55.8510.01	EPHA7-WT	0.0500932	0	0.0557227	0.120067	0	0.0873807	0.00620869	0.0731549	0.0058823	0	0	0.0271244	0.0293065	0.0534422	0.0951556	0.290074	0.0374504	0	0.0634492	0	0	0.0054885	0.025	0.230699	0.986771
TCGA.D6.A6EO.01	EPHA7-WT	0	0.0620498	0.109876	0	0	0	0	0.111247	0.050967	0.0162831	0.00864038	0.0210177	0	0.17162	0.0595397	0.0870513	0	0.118326	0	0.169487	0.00946225	0.00443361	0.025	0.237841	0.994684
TCGA.QU.A6IP.01	EPHA7-WT	0	0.00883033	0.131644	0.165526	0	0.0535067	0	0.111713	0.00237451	0	0.0270597	0	0.0746749	0.143975	0.0390241	0.136711	0.00852882	0	0.0964316	0	0	0	0.025	0.228154	0.988795
TCGA.XF.A8HH.01	EPHA7-WT	0.0306207	0.00648948	0.114523	0.050232	0	0.0226904	0	0.105615	0.0379196	0	0.00310366	0.0256625	0.0211563	0.0174615	0.0598784	0.324519	0.100005	0.0114401	0.0686829	0	0	0	0.025	0.232791	0.986426
TCGA.FD.A3B7.01	EPHA7-WT	0	0.0352965	0.0296155	0.270473	0	0.0181683	0.0273141	0.0301455	0.028072	0	0	0.0131868	0	0.165915	0.106317	0.204541	0	0	0	0.0649774	0	0.00597765	0.025	0.226557	0.997695
TCGA.AC.A3TM.01	EPHA7-WT	0.0288696	0	0.0914446	0.205981	0	0	0	0.154204	0.0918083	0	0	0.0579592	0.00908683	0.0545819	0.0371229	0.207117	0.0103171	0	0.0489026	0	0	0.0026047	0.025	0.236322	0.988977
TCGA.XF.A9SJ.01	EPHA7-WT	0.0791828	0	0.0655962	0.277963	0	0	0.0031477	0.0659834	0.0237524	0	0	0.084937	0.0149687	0	0.114703	0.25773	0	0	0	0.00647794	0	0.00555831	0.025	0.237319	0.996298
TCGA.NC.A5HL.01	EPHA7-WT	0.0403899	0.0418978	0.0380313	0.159623	0	0.0485878	0.00588327	0.110269	0.00438431	0	0	0.0716813	0.0009	0.172371	0.122921	0.165168	0	0	0	0.0178913	0	0	0.025	0.229675	0.996753
TCGA.CG.4301.01	EPHA7-WT	0.117558	0	0.0333585	0.0162947	0	0.192918	0	0.0305665	0.0120542	0	0	0.0164746	0.00482041	0.0309307	0.0468934	0.359402	0.0484166	0.00848466	0.0250001	0.0376407	0.00574168	0.013446	0.025	0.237655	0.9854
TCGA.68.8251.01	EPHA7-WT	0.108766	0	0.0389166	0.0962927	0	0.276392	0	0.0265145	0	0	0.00162634	0.0258613	0	0.117102	0.0580451	0.206659	0	0	0	0.0324179	0	0.011407	0.025	0.23025	0.991565
TCGA.QF.A5YT.01	EPHA7-WT	0.0536102	0	0.106172	0.19277	0	0	0	0.102345	0	0	0	0.121269	0.02277	0.023158	0.016616	0.226142	0.0376557	0.00643771	0.0872503	0	0	0.0038033	0.025	0.230128	0.991053
TCGA.AN.A0XS.01	EPHA7-WT	0.0176727	0.0290432	0.0726239	0.156629	0	0.225399	0	0.0650111	0.0319835	0	0	0.0402442	0.010056	0	0.0584476	0.25169	0.00154123	0	0.0373495	0	0	0.00230938	0.025	0.230552	0.992069
TCGA.AZ.6599.01	EPHA7-WT	0.0823408	0	0.090289	0.192236	0	0.236724	0	0.0819397	0.0287986	0	0	0.101421	0.0173803	0	0.0151686	0.11651	0	0.0118246	0.0253683	0	0	0	0.025	0.233504	1.00397
TCGA.KK.A8IC.01	EPHA7-WT	0.081091	0	0.0813906	0.117697	0	0.201601	0	0.0527739	0.00336235	0	0	0.0597133	0.0287602	0	0.0365883	0.216096	0.0334222	0.00403457	0.0824763	0	0	0.001	0.025	0.232636	0.986163
TCGA.FD.A6TE.01	EPHA7-WT	0	0.00245376	0.162395	0.18666	0	0.109833	0	0.21623	0.00771339	0	0	0.0685289	0.00747031	0.00322509	0.0648181	0.0898733	0.0208974	0.0579574	0.00194429	0	0	0	0.025	0.235186	1.00434
TCGA.VQ.A8PE.01	EPHA7-WT	0.0603143	0.100816	0	0.0786523	0	0.152618	0.097504	0.104089	0.00521093	0	0	0.0108434	0	0.127612	0.0347011	0.205405	0	0.0160659	0	0.0061677	0	0	0.025	0.234309	0.987211
TCGA.XV.AB01.06	EPHA7-WT	0.0323414	0.0673196	0.039059	0.253123	0	0	0	0.0727914	0.0792947	0	0	0.0817736	0.0213812	0	0.0417563	0.285715	0.00218591	0	0.0232584	0	0	0	0.025	0.226852	0.994904
TCGA.A2.A4RW.01	EPHA7-WT	0.0709361	0	0.0436424	0.133254	0	0.0563041	0	0.0390197	0.0426265	0	0	0.0472404	0.013161	0	0.0599572	0.209759	0.0292792	0	0.25482	0	0	0	0.025	0.238474	0.983662
TCGA.FP.7998.01	EPHA7-WT	0.0629248	0	0.0342357	0.235038	0	0.0435904	0.0913658	0.0277742	0.0801291	0	0.0251323	0.00598272	0.0237788	0.0558539	0.126615	0.129507	0.0109852	0	0.0470873	0	0	0	0.025	0.23176	0.990972
TCGA.13.0916.01	EPHA7-WT	0.0689774	0	0.0124664	0.171559	0	0	0	0.125358	0.0484545	0	0	0.0414892	0.0045157	0.146844	0.162318	0.218017	0	0	0	0	0	0	0.025	0.237109	0.997688
TCGA.E2.A1LG.01	EPHA7-WT	0.0239402	0	0.109372	0.071336	0	0.04369	0	0.142724	0	0	0	0.035429	0.0004	0.0706253	0.12395	0.314776	0.0339743	0	0.0297471	0	0	0	0.025	0.232321	0.992823
TCGA.E9.A245.01	EPHA7-WT	0	0.061868	0.0712942	0.0906506	0	0.075462	0	0.076755	0.00253836	0	0.0412323	0.00792662	0.0387821	0.0222857	0.0471065	0.263571	0.0165251	0	0.184003	0	0	0	0.025	0.235022	0.982411
TCGA.E9.A1R0.01	EPHA7-WT	0.114718	0	0.0227437	0.13143	0	0.10165	0	0.103069	0.0315722	0	0	0.0487106	0.0080148	0.0672031	0.0163115	0.206029	0.0004	0.00322674	0.14493	0	0	0	0.025	0.227069	0.988009
TCGA.EW.A6S9.01	EPHA7-WT	0.0823533	0	0.084808	0.0171572	0	0	0	0.0639901	0.0090444	0	0	0.0180484	0	0.203986	0.0438107	0.364145	0	0	0.112657	0	0	0	0.025	0.235733	0.998722
TCGA.E7.A7XN.01	EPHA7-MUT	0	0.00446883	0.00375659	0.338695	0	0	0.0553729	0.0983468	0.0481848	0	0	0.137666	0.0126772	0	0.145247	0.114385	0.016475	0.00288128	0.0190658	0	0	0.00277718	0.025	0.229781	1.02106
TCGA.AJ.A3BD.01	EPHA7-WT	0.003465	0.0299055	0.0939137	0.168969	0	0	0.0234783	0.117855	0.0229554	0	0	0.080083	0.0404656	0.0549835	0.0786417	0.204164	0.0105729	0	0.0705477	0	0	0	0.025	0.238475	0.984572
TCGA.HI.7170.01	EPHA7-WT	0.0438788	0	0.105404	0.157241	0	0.160316	0	0.0579319	0.00548691	0	0	0.0489911	0.0232526	0	0.0329403	0.233697	0	0	0.13086	0	0	0	0.025	0.238376	0.98501
TCGA.E5.A4TZ.01	EPHA7-WT	0.0701016	0	0.0999003	0.054836	0.00635347	0	0	0.163372	0.0115157	0	0.00560187	0.00422923	0	0.170736	0	0.254109	0	0.128382	0.023147	0	0	0.00771664	0.025	0.232461	0.992508
TCGA.IN.A6RR.01	EPHA7-WT	0.0701326	0	0.0832735	0.255763	0	0.100891	0	0.108302	0	0	0	0.0255513	0.0348813	0	0.0393495	0.230777	0	0	0.0130567	0.036169	0	0.00185384	0.025	0.230396	0.99395
TCGA.ND.A4WA.01	EPHA7-WT	0	0.105664	0.0648084	0.0794353	0	0.0570689	0	0.0261025	0	0	0	0.0632828	0.0655649	0	0.0248304	0.451286	0	0	0.0619566	0	0	0	0.025	0.23054	0.992339
TCGA.39.5011.01	EPHA7-WT	0.0417786	0	0.0644876	0.09412	0	0.0911468	0.0497442	0.0898527	0	0.057543	0	0.0225744	0	0.0274036	0.142217	0.279959	0.0199411	0	0	0.011937	0	0.00729509	0.025	0.235185	0.991596
TCGA.CR.5248.01	EPHA7-WT	0.0281739	0.0209805	0.0437065	0.268148	0	0	0.0315292	0.0632217	0.0877996	0	0	0.110423	0.0005	0.119466	0.0487767	0.118235	0.0173619	0	0.0416637	0	0	0	0.025	0.237174	0.993348
TCGA.AR.A1AQ.01	EPHA7-WT	0.0221703	0.00687445	0.0772092	0.120549	0	0.160957	0	0.127579	0.00552267	0	0	0.0272735	0.00380797	0.0637998	0.126672	0.188028	0.0431035	0	0.0250966	0	0	0.00135603	0.025	0.230721	0.992136
TCGA.BR.8365.01	EPHA7-WT	0.0426345	0.0540603	0.043193	0.168961	0	0.265845	0	0.0524486	0.0290164	0	0	0.0495723	0.0196296	0	0.0445874	0.154873	0	0.0003	0.0748764	0	0	0	0.025	0.230681	0.994194
TCGA.58.A46K.01	EPHA7-WT	0.00111345	0.0386533	0.0795852	0.207257	0	0	0.0247579	0.110842	0.0608101	0	0.0120367	0.0230166	0.00919691	0	0.121671	0.242267	0	0.0569829	0.0118096	0	0	0	0.025	0.228233	0.995815
TCGA.09.1665.01	EPHA7-WT	0.00186243	0.0774154	0.0713878	0.072888	0	0.138473	0	0.120061	0.00206526	0	0	0.0739274	0.0174899	0.0319513	0.0709062	0.263545	0	0.0502397	0.00778849	0	0	0	0.025	0.230513	0.989594
TCGA.VQ.A8DU.01	EPHA7-WT	0.101228	0	0.0542563	0.136103	0	0.12261	0.0350976	0.0840198	0.0342145	0	0	0.0735071	0.0147806	0.0179559	0.0546414	0.164555	0	0.0008	0.10558	0	0	0.0006	0.025	0.228154	0.989165
TCGA.DK.A3IV.01	EPHA7-WT	0.0749315	0.0921518	0	0.0569154	0	0.212304	0	0.177838	0.0566431	0	0.0110116	0.0134988	0	0.0154578	0.0991345	0.0993008	0	0.0570636	0.0337496	0	0	0	0.025	0.232637	0.996706
TCGA.UF.A719.01	EPHA7-WT	0.0616986	0	0.0927621	0.0977996	0	0.041416	0	0.125159	0.0184982	0	0.0333542	0.0400575	0.00513089	0.143281	0.0166102	0.189809	0.0498472	0.0537896	0	0.0205228	0.00388451	0.00637969	0.025	0.227709	0.990039
TCGA.AC.A3HN.01	EPHA7-WT	0.0824812	0	0.0396528	0.0767314	0	0.139403	0	0.0515283	0.00639222	0	0	0.00564324	0	0.25091	0.0651118	0.190482	0	0	0.091665	0	0	0	0.025	0.230831	0.992362
TCGA.G9.6370.01	EPHA7-WT	0.0218826	0.0588628	0.072549	0.203404	0	0.132236	0	0.0573369	0	0	0	0.0931974	0.01644	0	0.0186932	0.207622	0.0355991	0	0.0746329	0.00754389	0	0	0.025	0.227894	0.992273
TCGA.B6.A0RV.01	EPHA7-WT	0.133216	0	0.0240124	0.256045	0	0.114332	0	0.0371869	0.0944537	0	0	0.00891208	0.0643991	0.0944827	0.0671677	0.0973887	0	0	0.00840282	0	0	0	0.025	0.229494	0.995932
TCGA.05.4415.01	EPHA7-WT	0.00396197	0	0.116647	0.262018	0	0	0	0.0721433	0.0242156	0	0	0.103916	0.0185692	0.0486706	0.104545	0.158306	0	0.0467738	0.0190793	0	0	0.0211537	0.025	0.235134	0.997203
TCGA.S3.AA11.01	EPHA7-WT	0.0501395	0	0.11034	0.0228842	0	0	0	0.0690735	0.00579798	0	0	0.0238762	0	0.257241	0.0211495	0.275047	0	0	0.164451	0	0	0	0.025	0.228894	1.00207
TCGA.52.7622.01	EPHA7-WT	0.0688805	0	0.0477509	0.0820573	0	0.164111	0.0219863	0.0572624	0	0	0.0447103	0.0393991	0.0284176	0.0835806	0.0908298	0.217383	0.00538813	0.00118102	0.0434361	0	0	0.00362555	0.025	0.236993	0.984883
TCGA.D5.5537.01	EPHA7-WT	0.00807362	0	0.13692	0.0618177	0	0.221254	0	0.0670284	0.0622515	0	0	0	0.0088123	0.0627362	0.0292074	0.232565	0.0594356	0	0	0.0498981	0	0	0.025	0.230744	0.990216
TCGA.55.6970.01	EPHA7-WT	0.0134198	0.0141966	0.078895	0.0831628	0	0.213776	0	0.0299426	0.00176085	0	0	0.03666	0.0432625	0.0167382	0.0418816	0.307107	0	0.0806116	0.0344453	0	0	0.0041398	0.025	0.232255	0.986479
TCGA.CA.6718.01	EPHA7-MUT	0.051662	0	0.0670325	0.113462	0	0.0765776	0	0.0995808	0.0195583	0.0132102	0	0.123678	0	0.0346365	0.1626	0.20195	0	0	0.0215356	0	0	0.0145178	0.025	0.237918	0.998014
TCGA.BR.8486.01	EPHA7-WT	0.0888643	0	0.0559212	0.00965338	0	0.23	0.0722571	0.0836229	0.0605023	0	0	0.0123012	0	0.191089	0.0208051	0.172759	0	0.0006	0.00159336	0	0	0	0.025	0.231484	0.991237
TCGA.13.0887.01	EPHA7-WT	0.125278	0	0.0521621	0.0384397	0	0.0420119	0	0.0923654	0	0	0	0.0658671	0.0440798	0	0	0.248618	0	0.158146	0	0.133032	0	0	0.025	0.227108	0.99239
TCGA.LL.A5YM.01	EPHA7-WT	0	0.032364	0.0662597	0.119465	0	0	0	0.0508694	0.0229028	0	0	0.0114679	0.0093721	0.209521	0.0215029	0.364347	0	0	0.091928	0	0	0	0.025	0.236108	0.995726
TCGA.NC.A5HE.01	EPHA7-WT	0.04014	0	0.0561412	0.272039	0	0	0.0812832	0.0471102	0.0245643	0	0	0.0534534	0.0236628	0.0651713	0.122319	0.159363	0.027248	0	0.0254387	0	0	0.00206638	0.025	0.238199	0.989767
TCGA.66.2777.01	EPHA7-WT	0.0519012	0	0.0671645	0.035748	0	0.0923974	0.00543335	0.0100112	0.00652497	0	0.0457873	0	0.0530549	0.170926	0	0.410294	0.00470923	0.0162319	0.00779328	0.0220222	0	0	0.025	0.235314	0.998663
TCGA.D3.A2JG.06	EPHA7-WT	0	0.0300517	0.108135	0.216864	0	0	0	0.0302798	0	0	0	0.0387319	0.062016	0.100319	0.0207516	0.256082	0	0	0.136769	0	0	0	0.025	0.235584	0.985993
TCGA.AO.A12G.01	EPHA7-WT	0.104126	0	0.0383491	0.0953988	0	0.11915	0	0.0469641	0.0407147	0	0	0.025346	0.001	0	0.100101	0.280678	0.015055	0	0.125882	0	0	0.00727203	0.025	0.236211	0.984114
TCGA.B5.A0JN.01	EPHA7-WT	0.111553	0	0.081266	0.127866	0	0.11431	0	0.0991402	0.0101378	0	0.037441	0.0880045	0.0131653	0.00399618	0.0334133	0.228445	0	0.0512616	0	0	0	0	0.025	0.230655	0.994684
TCGA.R5.A7O7.01	EPHA7-WT	0.0982789	0	0.0610342	0.0549981	0	0.379811	0.034836	0.013646	0.0564253	0	0.0198299	0	0.0169766	0.00469647	0.0431802	0.0473312	0	0.0003	0	0.160878	0	0.00774305	0.025	0.2361	0.996299
TCGA.55.8620.01	EPHA7-WT	0.0582961	0	0.060646	0.137563	0	0.0566419	0	0.12753	0.0409214	0	0	0.040289	0.0008	0.0923015	0.0997983	0.279998	0	0	0.00491145	0	0	0.0003	0.025	0.23064	0.992704
TCGA.GC.A3I6.01	EPHA7-WT	0.00383103	0	0.019325	0.0717473	0	0.0322527	0	0.0915381	0.0185377	0	0	0.0849153	0	0.0547097	0.0982283	0.320501	0	0.115923	0.0845897	0	0	0.00390108	0.025	0.229344	0.995147
TCGA.LD.A74U.01	EPHA7-WT	0.0667602	0	0.0206936	0.0446068	0	0	0	0.0373647	0.0487501	0	0.052902	0	0	0.345467	0.0345365	0.246464	0.00665556	0	0.0957994	0	0	0	0.025	0.230028	1.00579
TCGA.CD.5801.01	EPHA7-WT	0.0802963	0	0.0213264	0.42163	0	0.0353802	0.0841852	0.0546354	0.0519188	0	0	0.0436608	0.0170779	0	0.0555912	0.118294	0.002244	0	0	0.0137598	0	0	0.025	0.230134	1.01019
TCGA.D3.A8GB.06	EPHA7-MUT	0.0539489	0.0446923	0.038192	0.277949	0	0	0	0.179362	0.055373	0	0	0.102792	0.0216657	0.0202439	0.0780275	0.101159	0	0	0.0265945	0	0	0	0.025	0.237046	1.00162
TCGA.AR.A24K.01	EPHA7-WT	0.123439	0	0.0648914	0.073598	0	0.0890629	0	0.0641493	0.010229	0	0	0.0228905	0.0259187	0	0.0227294	0.438435	0.021099	0.0168917	0	0.0104443	0	0.0162212	0.025	0.236736	0.990613
TCGA.60.2726.01	EPHA7-WT	0.0414907	0.0155112	0.0758183	0.215073	0	0.0840869	0	0.144565	0	0	0	0.06987	0.0110842	0.0055171	0.120652	0.176069	0	0	0.0402625	0	0	0	0.025	0.23153	0.997425
TCGA.2Y.A9H5.01	EPHA7-WT	0.00486813	0.0341398	0.111706	0.0828972	0	0.173861	0	0.102225	0.0521877	0	0	0.0430994	0.0127171	0.0262712	0.0398013	0.25063	0.033311	0	0.0322849	0	0	0	0.025	0.228479	0.989866
TCGA.39.5021.01	EPHA7-WT	0.00866414	0.0005	0.0935987	0.148485	0	0.159364	0.00859598	0.0259876	0.0176395	0	0	0.0390256	0.0124568	0.0967035	0.125925	0.233668	0.0173553	0	0.0120661	0	0	0	0.025	0.231349	0.993605
TCGA.CN.6992.01	EPHA7-WT	0.0809884	0	0.0678591	0.0309069	0	0.0773162	0	0.0375357	0.0540013	0	0.0169029	0	0.00414604	0.202556	0.0344493	0.345491	0	0.0226431	0.0248729	0	0	0.0003	0.025	0.236679	0.99484
TCGA.E7.A519.01	EPHA7-WT	0	0.0382992	0.0972757	0.12702	0	0	0	0.0699937	0.172659	0	0.0702358	0.0131714	0.113245	0.0740138	0	0.150022	0	0.0736872	0.0004	0	0	0	0.025	0.227619	0.989205
TCGA.GM.A2D9.01	EPHA7-WT	0.0405488	0	0.10166	0.122014	0	0.060783	0	0.072577	0.0197055	0	0	0.033821	0.0198344	0.0305922	0.0571114	0.423916	0	0	0.0174371	0	0	0	0.025	0.236149	0.991035
TCGA.FA.A4XK.01	EPHA7-WT	0	0.359727	0	0.0635313	0	0	0.0161703	0.040898	0.0477557	0	0.0140128	0	0.0406677	0.244981	0	0.0963954	0	0.0691322	0	0.00672892	0	0	0.025	0.227849	1.00331
TCGA.FP.8631.01	EPHA7-WT	0.0597711	0	0.103255	0.0418675	0	0.159253	0	0.0778511	0.0169326	0	0	0.0845734	0.0112066	0.0363727	0	0.110124	0	0.155704	0.136185	0	0	0.00690402	0.025	0.237143	0.984074
TCGA.60.2713.01	EPHA7-WT	0.0490342	0	0.0546685	0.0742145	0	0.176007	0.00850118	0	0	0	0.00609834	0.0144393	0.0122826	0.145852	0.0340982	0.396832	0	0	0.0255147	0	0	0.00245738	0.025	0.237283	0.993093
TCGA.D7.5578.01	EPHA7-WT	0.0608629	0.00454164	0.057178	0.148237	0	0.0989321	0	0.0784734	0.0654604	0	0	0.0394151	0.038955	0.0717491	0.0663497	0.178313	0.0167046	0	0	0.0706785	0	0.00414935	0.025	0.227862	0.98936
TCGA.HR.A2OG.06	EPHA7-WT	0.00941176	0.00303206	0.114424	0.0714573	0	0.0145898	0	0.0467902	0.0252555	0	0	0.0203616	0.0259048	0.288901	0.0499389	0.30259	0	0	0.0273432	0	0	0	0.025	0.231334	1.00639
TCGA.55.8513.01	EPHA7-WT	0.0574795	0.0348906	0.0442563	0.0165872	0	0.0313287	0	0.0412893	0	0	0.00460682	0.0076397	0.0153615	0.0454849	0.00801373	0.594865	0.0402231	0.00922464	0.0466692	0	0	0.0020802	0.025	0.234802	1.00758
TCGA.A6.6648.01	EPHA7-WT	0.0412084	0	0.0974717	0.100707	0	0.174162	0	0.00153189	0.0294136	0	0	0.0822987	0.0110432	0.0257563	0.0498781	0.249136	0.0134493	0	0.123944	0	0	0	0.025	0.231636	0.986264
TCGA.94.7943.01	EPHA7-WT	0.0508795	0	0.0825451	0.0968243	0	0.160629	0	0.0950473	0.0020388	0	0	0.0127778	0.0305042	0.0140924	0.0452308	0.358717	0.0321491	0.00337932	0.0151855	0	0	0	0.025	0.233918	0.9884
TCGA.A8.A093.01	EPHA7-WT	0.116928	0	0.0577641	0.0808395	0	0.0326846	0	0.0331207	0.0220993	0	0.0182539	0	0.00811796	0.00192201	0.0202107	0.44012	0.0390511	0	0.106431	0	0	0.0224568	0.025	0.233679	0.989711
TCGA.XF.A9ST.01	EPHA7-WT	0.105418	0	0.0815744	0	0.0444658	0	0	0.109716	0.0205498	0	0.0778205	0	0	0.134515	0.00263495	0.228898	0	0.0783268	0	0.101651	0	0.01443	0.025	0.238177	0.987063
TCGA.AR.A24M.01	EPHA7-WT	0.131348	0	0.0476276	0.0469232	0	0.052042	0	0.00594707	0.0008	0	0	0.00358667	0.00462313	0	0.0250408	0.447107	0.00600978	0	0.215444	0	0	0.0135018	0.025	0.235821	0.993275
TCGA.85.8350.01	EPHA7-WT	0.0394258	0	0.0746076	0.136958	0	0.0613523	0	0.136834	0.0207122	0	0	0.0449062	0.0307142	0.0811037	0.0181719	0.26519	0.0451657	0.017505	0.0132701	0.0140838	0	0	0.025	0.228659	0.988946
TCGA.VQ.A922.01	EPHA7-MUT	0.102261	0	0.0807825	0.0212941	0	0.115479	0	0.12293	0.008406	0	0.012791	0	0	0.115018	0.134506	0.265242	0	0	0	0.0212901	0	0	0.025	0.232685	0.995088
TCGA.AR.A5QM.01	EPHA7-WT	0.0970555	0	0.0269591	0.0889137	0	0	0	0.0531629	0.0552802	0	0	0	0	0.260841	0.0460135	0.207244	0	0	0.141472	0.0230571	0	0	0.025	0.228757	0.995454
TCGA.BH.A0EE.01	EPHA7-MUT	0.0617129	0.00571965	0.0661487	0.0646159	0	0.0379454	0	0.135804	0.0357704	0	0.0105284	0.0394387	0.00298222	0.0772579	0.154753	0.144986	0	0.110639	0.0480702	0	0	0.00362799	0.025	0.230725	0.997736
TCGA.BR.8686.01	EPHA7-WT	0.120738	0.0168022	0	0.27215	0	0.115613	0.00274508	0.0365638	0.0607766	0	0	0.0504861	0.0255126	0	0.102761	0.158129	0	0	0.0364337	0.0012892	0	0	0.025	0.227871	1.00047
TCGA.EW.A6SD.01	EPHA7-WT	0.00399596	0.00536364	0.103657	0.105794	0	0.0786923	0	0.0737638	0.060571	0	0	0.0325162	0.00258895	0.0897794	0.132474	0.264758	0	0	0.036764	0	0	0.00928255	0.025	0.230439	0.99302
TCGA.BA.A4IF.01	EPHA7-WT	0.0484713	0.0231372	0.0919782	0.0342907	0	0.0778613	0	0.0902269	0	0	0	0.179954	0.0407138	0.129353	0.0254412	0.120364	0.0504806	0.0456746	0.0345752	0	0	0.00747769	0.025	0.233248	0.991071
TCGA.AD.6890.01	EPHA7-WT	0.00279135	0.0271213	0.100834	0.131224	0	0.0367079	0.125479	0.0204291	0	0	0.0611638	0	0	0.251894	0.0660214	0.123424	0	0	0	0.0437087	0.0092014	0	0.025	0.229557	0.9939
TCGA.G9.A9S7.01	EPHA7-WT	0.00810731	0.0506856	0.113217	0.156161	0	0.13054	0	0.185092	0	0	0	0.0639699	0.0117306	0.0098639	0.0796514	0.121281	0.0168939	0	0.0528057	0	0	0	0.025	0.233338	0.995254
TCGA.MP.A4TI.01	EPHA7-WT	0.0634337	0	0.035192	0.0891046	0	0.10685	0.0487678	0.062391	0.0314441	0	0.0311041	0.00904836	0.00824313	0.157241	0.0965433	0.236798	0.0103145	0	0.00874686	0.00477694	0	0	0.025	0.231505	0.99006
TCGA.MP.A4TK.01	EPHA7-MUT	0.0129052	0.0570037	0.0409158	0.0625758	0	0.10028	0	0.0280111	0.0252929	0	0.0302729	0	0	0.252384	0.0315235	0.339939	0	0	0.0188963	0	0	0	0.025	0.230575	1.00178
TCGA.BH.A0B1.01	EPHA7-WT	0.0933467	0	0.0600083	0.054849	0	0.14941	0	0.071561	0	0	0	0.0580706	0	0.0093933	0.073098	0.233271	0.034399	0	0.15385	0	0	0.00874266	0.025	0.229281	0.985174
TCGA.A2.A0CP.01	EPHA7-WT	0.0288146	0	0.0778671	0.151495	0	0.075225	0	0.0389585	0.0468473	0	0	0	0.0147336	0.0393926	0.0696864	0.177381	0.00987031	0	0.269728	0	0	0	0.025	0.228224	0.989402
TCGA.CD.8525.01	EPHA7-WT	0.107142	0	0.0307267	0.182605	0	0.0591733	0	0.0949349	0.0810577	0	0	0.034358	0.0110977	0.113365	0.153249	0.131275	0	0	0.00101588	0	0	0	0.025	0.231298	0.998719
TCGA.24.1545.01	EPHA7-WT	0.0315358	0	0.0939502	0.144294	0	0.176645	0	0.0372815	0.0566757	0	0	0.0465015	0.079536	0	0.0903734	0.225226	0	0.0005	0.0108858	0	0	0.00658358	0.025	0.228361	0.991917
TCGA.LL.A50Y.01	EPHA7-WT	0	0.0782504	0.041427	0.113546	0	0	0	0.119792	0.0614182	0	0.0248982	0	0.0217774	0.0882294	0.0264769	0.335633	0.0254592	0	0.0568433	0	0	0.00624823	0.025	0.229587	0.98817
TCGA.78.7160.01	EPHA7-WT	0.094901	0	0.0321963	0.176253	0	0.177621	0.00246105	0.0327167	0.0143301	0	0	0.0489686	0.0260994	0.0475155	0.061988	0.253029	0.00401977	0.015635	0.0122665	0	0	0	0.025	0.237043	0.988304
TCGA.EB.A3Y7.01	EPHA7-WT	0.0478617	0.00940765	0.0002	0.0346685	0.00765171	0	0.0256167	0.157061	0.0178497	0	0.0998959	0	0	0.310191	0	0.158073	0	0.0639993	0	0.0675536	0	0	0.025	0.231689	0.99937
TCGA.43.2578.01	EPHA7-WT	0.0233645	0	0.0901762	0.181886	0	0.0379169	0	0.067128	0	0	0.00662652	0.0315226	0.0200657	0.00572844	0.152428	0.314252	0	0.0005	0.068454	0	0	0	0.025	0.233116	0.993738
TCGA.CH.5748.01	EPHA7-MUT	0.103968	0	0.0661796	0.155142	0	0.0840727	0	0.0995675	0.0135515	0	0	0.0407015	0.0164045	0.0375703	0.075555	0.20418	0.0191169	0.00634207	0.0776486	0	0	0	0.025	0.232521	0.986577
TCGA.C8.A26X.01	EPHA7-WT	0.0183865	0.0182159	0.0656182	0.134946	0	0.0871284	0.0213549	0.0623039	0.025466	0	0	0.028666	0	0.145238	0.111385	0.250389	0.0178863	0	0.0130161	0	0	0	0.025	0.231164	0.992464
TCGA.AN.A0FD.01	EPHA7-WT	0.0621933	0	0.0438076	0.100237	0	0.0449691	0	0.0943868	0.0783073	0	0	0.0748975	0	0.138839	0.0834938	0.247007	0	0	0.028641	0	0	0.00322173	0.025	0.230495	0.990802
TCGA.YL.A8SB.01	EPHA7-WT	0.0450474	0	0.10457	0.0978406	0	0.103531	0	0.104238	0	0	0	0.0915417	0.0215345	0	0.00400085	0.210208	0.0164115	0	0.201077	0	0	0	0.025	0.229869	0.989019
TCGA.E9.A1N3.01	EPHA7-WT	0	0.0608858	0.0926913	0.122434	0	0.11754	0	0	0.0002	0	0.0477063	0	0.0396412	0	0.0225251	0.439661	0	0.00339707	0.0533678	0	0	0	0.025	0.227124	0.993132
TCGA.EJ.5542.01	EPHA7-WT	0.0874459	0	0.0893087	0.0695487	0	0.278275	0	0.0233369	0	0	0	0.0500868	0.0161859	0	0.0367429	0.142683	0.0635223	0.00295375	0.13991	0	0	0	0.025	0.237147	0.983908
TCGA.BH.A209.01	EPHA7-WT	0.101788	0	0.0143138	0.257073	0	0.100613	0.00850737	0.0330322	0.030414	0.0064469	0	0.018119	0.00112555	0.0337984	0.178939	0.171	0.0153679	0	0.0294616	0	0	0	0.025	0.233574	1.00163
TCGA.A2.A0YE.01	EPHA7-MUT	0.0729758	0	0.0970918	0.04741	0	0.0359625	0	0.204719	0	0	0	0.0429429	0.0141574	0.0576354	0.127687	0.270871	0	0	0.0285484	0	0	0	0.025	0.234952	0.991653
TCGA.78.7158.01	EPHA7-WT	0.117687	0	0.0421161	0.0308359	0	0.173441	0	0.0175284	0.0210848	0	0	0.0473341	0.0751821	0.00567542	0.025008	0.29991	0.0380807	0.0106771	0.0954388	0	0	0	0.025	0.23787	0.981385
TCGA.FA.8693.01	EPHA7-WT	0	0.117971	0	0.200929	0	0	0.0843669	0.0801918	0.0313041	0.0520953	0	0	0	0.220088	0.0860339	0.105783	0	0	0.021236	0	0	0	0.025	0.236418	0.990298
TCGA.GU.A764.01	EPHA7-WT	0.00520471	0.0130157	0.0937721	0.108663	0	0.133074	0	0.121998	0	0	0	0.0739996	0.00379639	0.0127764	0.118977	0.247157	0.0192584	0	0.0465284	0	0	0.00177986	0.025	0.228249	0.992933
TCGA.E2.A1LB.01	EPHA7-WT	0	0.00402768	0.123552	0.120696	0	0.097682	0.00437596	0.0337087	0.0724462	0	0	0.00735947	0.0244582	0	0	0.420429	0.00136423	0.0135038	0.0763965	0	0	0	0.025	0.228602	0.992047
TCGA.13.0905.01	EPHA7-WT	0.161075	0	0.0255485	0.146679	0.0134173	0	0	0.142196	0.0579222	0	0	0.060931	0.0170919	0.0388396	0.0316736	0.136217	0	0.147453	0	0.0209558	0	0	0.025	0.235159	0.99068
TCGA.BH.A0BO.01	EPHA7-WT	0.122493	0	0.0356956	0.050622	0	0.101163	0.0126937	0.00531221	0.00261952	0	0	0	0.134279	0	0.00733735	0.264617	0	0.0183112	0.100748	0.0287628	0	0.115345	0.025	0.231643	0.989296
TCGA.BW.A5NO.01	EPHA7-WT	0.0489643	0	0.121919	0.0670963	0	0.239597	0	0.0746264	0.00832006	0.0146507	0	0.078267	0	0.00289951	0.045691	0.266595	0	0	0.0304641	0	0	0.0009	0.025	0.235731	0.990782
TCGA.D3.A3MU.06	EPHA7-WT	0.036468	0.0437604	0.0292439	0.0671298	0	0.0130507	0	0.0834608	0.0238554	0	0	0.0198128	0.0269275	0.431253	0.0674108	0.14303	0	0	0.0145968	0	0	0	0.025	0.238326	1.0102
TCGA.GV.A3JZ.01	EPHA7-WT	0.0473831	0	0.109675	0.10805	0	0.00950523	0	0.0581483	0.0290187	0	0	0.0311252	0	0.125786	0.0607895	0.385579	0.00797408	0	0	0.0229761	0	0.00399071	0.025	0.231617	0.997185
TCGA.66.2787.01	EPHA7-WT	0.0123923	0.00978148	0.0661846	0.250854	0	0	0.0363219	0.0561426	0.0142861	0	0	0.0189947	0.00174142	0.0231284	0.0911056	0.390993	0.0110964	0	0.0157702	0	0	0.00120782	0.025	0.234203	0.992082
TCGA.3C.AALJ.01	EPHA7-MUT	0.0921131	0	0.0148887	0.194349	0	0.109312	0	0.109208	0.0328788	0	0	0.00469424	0	0.126953	0.0627566	0.239321	0	0	0.0135258	0	0	0	0.025	0.229261	0.994066
TCGA.QK.A6VC.01	EPHA7-WT	0.0149776	0.00804389	0.0946054	0.127265	0	0.107521	0	0.152814	0.0379302	0	0.00814497	0.0170598	0.0041909	0.0140706	0.150592	0.0998254	0.0139986	0.109978	0.033724	0	0	0.00525886	0.025	0.232065	1.00125
TCGA.BH.A18P.01	EPHA7-WT	0.0804257	0	0.0579527	0.0772127	0	0.0737001	0	0.0736463	0.0197591	0	0	0.0360661	0	0.117808	0.107999	0.290751	0.00946021	0.00501078	0.0432239	0	0	0.00698395	0.025	0.234712	0.989407
TCGA.P3.A5Q5.01	EPHA7-WT	0.0384331	0	0.0553642	0.285736	0	0	0.0468772	0.0816251	0.0531228	0	0	0.0788058	0.003847	0.0387096	0.0516545	0.206492	0.0427057	0	0.0143878	0	0	0.00223989	0.025	0.2379	0.990739
TCGA.XF.A8HE.01	EPHA7-WT	0.0465185	0	0.0701938	0.266891	0	0.0077706	0.00433147	0.136939	0.0287709	0	0	0.0624845	0.0124526	0	0.0795592	0.134744	0	0.0118572	0	0.0499791	0	0.0875078	0.026	0.217925	1.00194
TCGA.44.A47A.01	EPHA7-WT	0.0727153	0	0.0364053	0.0470219	0	0.104646	0	0.0717029	0.0481878	0	0.0412949	0.0101627	0.0272382	0.0406586	0.0125372	0.285822	0.130852	0.0361093	0.0335225	0.00112306	0	0	0.026	0.224868	0.98709
TCGA.B6.A0RG.01	EPHA7-WT	0.101741	0	0.0643193	0.0602497	0	0.00480966	0	0.0788718	0.00619265	0	0	0.0217502	0.00550815	0.182367	0.0649485	0.251041	0.0281382	0	0.130063	0	0	0	0.026	0.226095	0.992809
TCGA.56.7221.01	EPHA7-WT	0.0033537	0.0616417	0.0383013	0.0164013	0	0	0	0.0524544	0.0282744	0	0.0260929	0	0	0.500534	0	0.239629	0	0.020552	0	0.00918367	0	0.00358155	0.026	0.218405	1.04672
TCGA.DF.A2L0.01	EPHA7-WT	0.0353052	0	0.0793403	0.0935347	0	0.00957467	0	0.0716571	0.106697	0.0275963	0	0.00953895	0	0.240237	0.058189	0.253576	0	0	0.014754	0	0	0	0.026	0.224402	0.999053
TCGA.23.2078.01	EPHA7-WT	0.185686	0	0	0.152707	0	0.160266	0	0.0902854	0.0605748	0	0	0	0.0217429	0.00279339	0.189455	0.134906	0.00158362	0	0	0	0	0	0.026	0.221623	1.01363
TCGA.NC.A5HI.01	EPHA7-WT	0.0531887	0	0.0726592	0.178563	0	0	0.00401398	0.175487	0	0	0.0425426	0	0.0249491	0.0956833	0.0399243	0.232804	0.0123047	0	0	0.0481938	0	0.0196866	0.026	0.222487	0.992734
TCGA.CR.6471.01	EPHA7-MUT	0.0906897	0	0.0272454	0.220625	0	0.171718	0.018446	0.0452555	0.0655817	0	0.00822654	0.00818708	0.0400288	0.065294	0.0732851	0.14166	0.0148636	0	0.00889408	0	0	0	0.026	0.220665	0.998129
TCGA.CR.7392.01	EPHA7-WT	0	0.0305161	0.0717374	0.117093	0	0.205415	0	0.018874	0.0432257	0	0	0.0121332	0	0.181445	0.0840378	0.184653	0	0.0175497	0.0248245	0	0	0.00849466	0.026	0.221957	0.995973
TCGA.DM.A1DA.01	EPHA7-MUT	0.0481368	0	0.099208	0.195148	0	0.0620301	0	0.0652542	0.0233028	0	0	0.0910555	0.00775323	0.0943422	0.0622187	0.210268	0.0115787	0	0.0297037	0	0	0	0.026	0.216661	0.998546
TCGA.AX.A3FW.01	EPHA7-WT	0.0311604	0	0.118412	0.116216	0	0.147619	0	0.13848	0.00782456	0	0	0.00240246	0.0505494	0.119047	0.0169819	0.177541	0.00485348	0.0396738	0	0.0292391	0	0	0.026	0.223459	0.993747
TCGA.34.5234.01	EPHA7-WT	0.0221428	0.00819196	0.0379006	0.162899	0	0.0443059	0.0355516	0.0581532	0	0.0204371	0	0.0171209	0.0339797	0	0.0573672	0.302128	0.0667829	0.0596884	0.0586695	0	0	0.0146816	0.026	0.215909	0.990743
TCGA.66.2756.01	EPHA7-WT	0.0056076	0.00871918	0.0967188	0.216146	0	0.0333027	0	0.0869334	0.0473641	0	0	0.039239	0.0204521	0	0.0407638	0.3931	0.0007	0	0.0109104	0	0	0	0.026	0.218237	0.998983
TCGA.EI.6510.01	EPHA7-WT	0.0053013	0.0280415	0.11382	0.14546	0	0.326279	0	0.058373	0.0793059	0	0	0.0524499	0.0128197	0.0452491	0.0278167	0.0729368	0.0190491	0.00226452	0	0.0108331	0	0	0.026	0.219964	1.00992
TCGA.77.8154.01	EPHA7-WT	0.0261787	0.0993744	0.0302682	0.0480377	0	0	0	0.119595	0	0	0.0287122	0	0.00782803	0.262854	0	0.20198	0	0.07094	0.104232	0	0	0	0.026	0.226151	0.99495
TCGA.DK.A3X1.01	EPHA7-WT	0	0.0322346	0.115186	0.110333	0	0	0	0.170873	0.015832	0	0.0679922	0	0.0193037	0.0527543	0.0700428	0.296886	0	0.0382849	0	0.0102784	0	0	0.026	0.218401	0.996561
TCGA.AC.A8OP.01	EPHA7-WT	0.0624516	0.0569059	0.0289849	0.0597341	0	0.0517533	0	0.125067	0.00284748	0	0	0.0602421	0	0.119206	0.0525521	0.258648	0	0	0.0665777	0.0550296	0	0	0.026	0.21524	0.994942
TCGA.33.4538.01	EPHA7-WT	0.0710015	0	0.0615398	0.27073	0	0.0292814	0	0.159081	0.00599718	0	0	0.00159923	0.0525597	0.0172871	0.0756602	0.132742	0.0426564	0.0008	0.0116431	0.0561778	0	0.0112116	0.026	0.220206	0.99608
TCGA.CN.5373.01	EPHA7-WT	0.102184	0	0.0302999	0.05134	0	0.172026	0.00377873	0.148323	0.0155705	0	0.0200783	0.0334165	0.0153173	0.0220175	0.10352	0.176257	0.0482757	0.0218839	0.0199344	0	0	0.0157762	0.026	0.215412	0.995322
TCGA.A1.A0SK.01	EPHA7-WT	0.103171	0	0.0705579	0.105572	0	0	0	0.194641	0	0	0	0.013871	0	0.260568	0.0294454	0.213855	0	0	0	0.00831877	0	0	0.026	0.224109	1.00212
TCGA.PE.A5DC.01	EPHA7-WT	0.084942	0	0.0483335	0.104937	0	0.114914	0	0.0524796	0.0186665	0	0	0.0403944	0	0.176937	0.0633958	0.200733	0	0	0.0942677	0	0	0	0.026	0.218993	0.992873
TCGA.GC.A3RB.01	EPHA7-WT	0	0.0433111	0.101131	0.130323	0	0.091513	0	0.0951484	0.0205793	0	0	0.0445331	0.00878608	0.00283834	0.01935	0.311533	0.0156092	0.0514412	0	0.0636111	0	0.0003	0.026	0.222551	0.992325
TCGA.AO.A0JJ.01	EPHA7-WT	0.0297281	0	0.0782848	0.152162	0	0.205572	0	0.0656743	0.0169154	0	0	0.0214379	0.0163349	0	0.0658076	0.257247	0.0224303	0	0.0684065	0	0	0	0.026	0.225605	0.990734
TCGA.75.5147.01	EPHA7-WT	0.0408519	0.00193862	0.0633239	0.0807548	0	0.0786655	0	0.0425613	0.0567814	0	0.00557811	0	0.027019	0	0.0369484	0.413392	0.0627913	0.0008	0.071013	0	0	0.0175802	0.026	0.220299	0.992365
TCGA.D8.A147.01	EPHA7-WT	0.111111	0	0.0352496	0.0306756	0	0.225588	0	0.0441306	0.0208203	0	0.013712	0	0.0172723	0.191002	0.0567	0.243477	0	0.00574465	0.00451749	0	0	0	0.026	0.222402	0.996639
TCGA.C8.A26Y.01	EPHA7-WT	0.15053	0	0.0137826	0.0293374	0	0.019963	0	0.117983	0.00310002	0	0	0.00512766	0	0.32612	0.0526337	0.281423	0	0	0	0	0	0	0.026	0.215179	1.01859
TCGA.EJ.7331.01	EPHA7-MUT	0.0105322	0.0692912	0.0590739	0.0679804	0	0.19343	0	0.00278572	0.00128847	0	0	0.0496368	0.074163	0.00444169	0.054848	0.156812	0.00865623	0	0.231823	0	0	0.0152374	0.026	0.216367	0.990606
TCGA.21.1076.01	EPHA7-WT	0.0420145	0.00745656	0.0440537	0.0633459	0	0.080953	0.0306046	0.0392185	0.0318002	0	0.0188437	0	0	0.143818	0.0703983	0.347898	0.0150151	0.00600211	0.0489292	0	0	0.00964833	0.026	0.223861	0.994483
TCGA.B6.A1KN.01	EPHA7-WT	0.0695813	0	0.0680369	0.103696	0	0.13567	0	0.133998	0	0	0	0.0266946	0.0108735	0	0.103387	0.202797	0	0.0783413	0.0664877	0	0	0.0004	0.026	0.220337	0.994574
TCGA.D8.A27T.01	EPHA7-WT	0.0995668	0	0.0263581	0.106941	0	0.173296	0	0.0441994	0.00962422	0	0	0.0500424	0.0407538	0.046065	0.0799772	0.183244	0.0024532	0.00362201	0.133857	0	0	0	0.026	0.221337	0.989075
TCGA.28.1753.01	EPHA7-WT	0	0.0266407	0	0.0211623	0	0.0226338	0	0.0388064	0.0181797	0	0	0.0310163	0	0.236907	0.0088739	0.566701	0	0	0	0.02067	0	0.0084086	0.026	0.220925	1.03812
TCGA.V1.A8WW.01	EPHA7-WT	0.114128	0	0.0685347	0.0675546	0	0.0808515	0	0.147214	0	0	0	0.138058	0.00367912	0.0658231	0.0647662	0.111786	0.0232359	0.0263617	0.0880074	0	0	0	0.026	0.222209	0.994471
TCGA.E9.A1NG.01	EPHA7-WT	0.0266482	0	0.0009	0.0358268	0	0.0554089	0	0.0283066	0.0453126	0	0.0163873	0	0.00293954	0.127248	0.00359917	0.570335	0	0.0004	0.0339693	0.0372928	0	0.0153991	0.026	0.221412	1.01887
TCGA.A8.A08J.01	EPHA7-WT	0.0439674	0	0.042079	0.0525076	0	0.0262716	0	0.03193	0.0159501	0	0	0.0188946	0	0.205261	0.0427236	0.464362	0	0	0.0454349	0	0	0.0106182	0.026	0.222769	1.01317
TCGA.FS.A4FD.06	EPHA7-WT	0.0628245	0	0.0637008	0.18214	0	0	0	0.074523	0.0466133	0	0	0.0495641	0.00760469	0.170045	0.0394743	0.2943	0	0	0.00920987	0	0	0	0.026	0.218513	0.99932
TCGA.S3.A6ZF.01	EPHA7-WT	0.159154	0	0	0.10212	0	0.141223	0	0.061683	0.00616782	0	0	0.0367249	0.00167692	0.0239564	0.0799214	0.295919	0.0007	0.0001	0.0907285	0	0	0	0.026	0.218059	0.9935
TCGA.BH.A0DQ.01	EPHA7-WT	0.118948	0	0.023849	0.0342887	0	0.0554325	0	0.030823	0.0171609	0.0008	0	0.00746722	0	0.281507	0.0517198	0.267222	0	0	0.110765	0	0	0	0.026	0.221614	1.00449
TCGA.HU.A4H8.01	EPHA7-WT	0	0.0807188	0.0597231	0.0957704	0	0.0915202	0.0558809	0.0496759	0.062413	0	0	0.0945808	0.010158	0.0786067	0.0410686	0.186402	0	0.0136141	0.0794848	0	0	0.0004	0.026	0.217472	0.990935
TCGA.YL.A9WH.01	EPHA7-WT	0.0141981	0.0657353	0.080453	0.0613218	0	0.117396	0	0.0925459	0	0	0	0.0512345	0.0209657	0.112884	0.0655371	0.18481	0.00317541	0.0145172	0.115227	0	0	0	0.026	0.222822	0.988168
TCGA.GN.A4U9.06	EPHA7-MUT	0.00793855	0	0.0263303	0.0544544	0	0.106296	0.0153684	0.128216	0.00929593	0	0	0.0504156	0.107297	0.115809	0.0425893	0.32094	0	0	0.0150491	0	0	0	0.026	0.217539	0.996911
TCGA.AR.A252.01	EPHA7-WT	0.0249372	0.0168675	0.0502434	0.20874	0	0.236851	0.00633014	0.0253974	0.0114472	0.0448758	0	0.0389905	0.00890429	0	0.0526094	0.232123	0.00952643	0	0.0321569	0	0	0	0.026	0.214629	1.00362
TCGA.33.4532.01	EPHA7-WT	0	0.036421	0.0760862	0.121264	0	0.0563257	0	0.097427	0	0	0	0.0406817	0.0161072	0.0332878	0.0265893	0.382412	0.0005	0.0627307	0.01637	0.0238848	0	0.00990087	0.026	0.214318	0.996374
TCGA.BH.A0B2.01	EPHA7-WT	0.108104	0	0.0112712	0.128728	0	0.118998	0	0.0390816	0.0282208	0	0	0.0135828	0	0.137154	0.0501509	0.316479	0	0	0.0482286	0	0	0	0.026	0.221382	0.995099
TCGA.5N.A9KI.01	EPHA7-WT	0.0118688	0.092946	0.059221	0.0739216	0	0	0	0.0774446	0.00832441	0	0	0.0284484	0.00599942	0.148666	0.0189067	0.352341	0.00213284	0.0378595	0.0734355	0	0	0.00848435	0.026	0.224648	0.995004
TCGA.G3.A3CI.01	EPHA7-WT	0.121362	0	0.0412888	0.11568	0	0.0658829	0	0.037786	0.0261958	0	0.0132487	0.0739713	0.0891497	0	0.0393628	0.340001	0	0	0	0.0360706	0	0	0.026	0.222359	0.99395
TCGA.DQ.5625.01	EPHA7-WT	0	0	0.0002	0.336501	0	0	0.00211613	0.090442	0.0647351	0	0	0.088486	0.00829081	0.0163389	0.133472	0.169534	0.0710613	0	0.0188041	0	0	0	0.026	0.222386	1.011
TCGA.86.8672.01	EPHA7-WT	0	0.0248578	0.0703879	0.205566	0	0.0304985	0	0.138296	0.038395	0	0	0.0754625	0.0122968	0.0620437	0.0493637	0.28915	0	0	0.0033365	0	0	0.0003	0.026	0.216621	1.0001
TCGA.BR.A4J8.01	EPHA7-WT	0.11056	0	0.0477774	0.0738079	0	0.163899	0	0.104836	0	0	0	0.0985898	0.00694992	0.0540539	0.0846792	0.167053	0	0	0.0877937	0	0	0	0.026	0.221649	0.993028
TCGA.22.4599.01	EPHA7-MUT	0.00632796	0	0.0727725	0.225165	0	0.00355076	0.0876366	0.0293703	0.0255533	0	0	0.0485428	0.0003	0.0447036	0.107407	0.328518	0.0003	0	0.0156476	0	0	0.00413918	0.026	0.224859	0.995723
TCGA.D5.5541.01	EPHA7-WT	0.0590245	0	0.0250493	0.067265	0	0	0.0184292	0.0511598	0.0467555	0	0	0	0	0.382331	0.0609842	0.236931	0.00932041	0	0	0.0427501	0	0	0.026	0.219147	1.021
TCGA.50.5931.01	EPHA7-WT	0	0.0628335	0.0856279	0.094845	0	0.0825933	0	0.22257	0	0	0	0.0784334	0	0.233456	0.0195635	0.0524444	0	0	0	0.053684	0.013949	0	0.026	0.222043	1.00128
TCGA.DK.A2I2.01	EPHA7-WT	0.00420316	0.0008	0.0001	0	0	0.0788297	0	0	0.0127018	0	0.141426	0	0	0.12704	0.0303836	0.149746	0.152558	0	0	0.291137	0	0.0110146	0.026	0.219586	1.02063
TCGA.H7.A76A.01	EPHA7-WT	0.015164	0.0557864	0.032075	0.117442	0	0.0793662	0.0286227	0.0644191	0.0662947	0	0.0283947	0.0215559	0.0671537	0.146565	0.110546	0.119693	0.0188137	0	0.0281082	0	0	0	0.026	0.225841	0.989835
TCGA.99.7458.01	EPHA7-WT	0.100019	0	0.0269351	0.125976	0	0.225244	0	0.0457614	0.0555799	0	0	0.0513171	0.00507418	0.0108645	0.0492069	0.221751	0.0209992	0	0.0558804	0	0	0.00539073	0.026	0.226357	0.99125
TCGA.OL.A5RZ.01	EPHA7-WT	0.0252136	0.0100619	0.131142	0.0574577	0	0	0	0.0862749	0	0	0	0.0444386	0.0115521	0.17089	0.00766493	0.40438	0	0	0.0509249	0	0	0	0.026	0.223751	1.00564
TCGA.H7.8501.01	EPHA7-WT	0.0152131	0	0.00318707	0.353647	0	0	0.10619	0.0482917	0.0248022	0	0.0220308	0.0212089	0.0147347	0	0.131228	0.216753	0.0208134	0	0	0.0219005	0	0	0.026	0.22609	1.00441
TCGA.JY.A938.01	EPHA7-WT	0	0.0554962	0.0541898	0.156974	0	0.10163	0.043843	0.104444	0.0466905	0	0	0.0537649	0.00637357	0.0233915	0.138154	0.136206	0	0.00852933	0.0416035	0	0	0.0287097	0.026	0.216889	0.999965
TCGA.XF.A9SI.01	EPHA7-WT	0.0869384	0.03189	0	0.287118	0	0.111709	0	0.115842	0.0473879	0	0	0.0634792	0.0110751	0.00714268	0.130736	0.106682	0	0	0	0	0	0	0.026	0.214598	1.01967
TCGA.CD.8524.01	EPHA7-WT	0.0899856	0	0.0478773	0.193381	0	0.0928918	0	0.0727721	0.0994444	0	0	0.0257746	0.00404896	0.00206425	0.106263	0.226793	0.020053	0	0.0186517	0	0	0	0.026	0.225716	0.995685
TCGA.63.A5MR.01	EPHA7-WT	0.0337165	0	0.104249	0.0234064	0	0.0259561	0	0.0748226	0	0	0.00834015	0.00274846	0	0.306603	0.0516292	0.119664	0	0.13044	0	0.118425	0	0	0.026	0.22417	1.01097
TCGA.AJ.A5DV.01	EPHA7-WT	0.00425811	0.0310345	0.101109	0	0	0.148239	0	0.0142789	0.0364289	0	0.039992	0	0.00275619	0.152998	0.0173173	0.219605	0.13466	0	0	0.0489264	0	0.048396	0.026	0.223462	0.993366
TCGA.DD.A3A6.01	EPHA7-WT	0.0096506	0	0.13437	0.0909621	0	0.0790703	0	0.0909965	0.0439022	0.0505417	0	0.207862	0.0297654	0	0.00365732	0.225391	0	0.0002	0.0336014	0	0	0	0.026	0.222377	1.0125
TCGA.5C.AAPD.01	EPHA7-WT	0.00100061	0.00626585	0.103888	0.177281	0	0.028137	0	0.119558	0.0489228	0	0	0.0429774	0.022122	0.0513991	0.12311	0.244987	0.0146514	0	0.0083324	0	0	0.00736704	0.026	0.216126	1.00015
TCGA.EW.A1PG.01	EPHA7-WT	0.131825	0	0.021741	0.062732	0	0.0813846	0	0.0486545	0	0	0.015925	0	0.027971	0.120107	0.0300509	0.25301	0.0571517	0.03482	0.106169	0	0.00729434	0.00116401	0.026	0.217998	0.990878
TCGA.AN.A0FN.01	EPHA7-WT	0.0881641	0.00200566	0.025614	0.0877589	0	0.237106	0	0.108332	0	0.0359901	0	0.0428314	0	0.0249217	0.0973295	0.133673	0.0214523	0	0.0877644	0.00476255	0	0.00229415	0.026	0.216965	0.99725
TCGA.DD.AAD1.01	EPHA7-WT	0.138096	0.0398327	0	0.174478	0	0.316432	0	0.00766712	0.0774772	0	0	0.0310925	0.0147537	0	0.0252778	0.131036	0.0355092	0	0.00569578	0.00265152	0	0	0.026	0.220239	1.00725
TCGA.CV.A461.01	EPHA7-WT	0.0109732	0	0.0662242	0.264402	0	0	0.0236874	0.0921426	0.0494617	0	0	0.0414579	0	0.0702745	0.102707	0.217003	0.0304507	0.00480671	0.0264095	0	0	0	0.026	0.217489	0.998577
TCGA.G9.6498.01	EPHA7-MUT	0.0967003	0.0330401	0.034456	0.239838	0	0.0839312	0	0.171528	0.0910223	0	0	0.0569976	0.0151634	0.00799273	0	0.120212	0	0.0343373	0.0145491	0.0002	0	0	0.026	0.21939	1.01007
TCGA.BB.8596.01	EPHA7-WT	0.065786	0	0.0205798	0.0208865	0	0	0.00606816	0.0535945	0.0171805	0	0.012397	0	0	0.457944	0.014371	0.284027	0	0.0172619	0.0299034	0	0	0	0.026	0.222479	1.03863
TCGA.D3.A5GN.06	EPHA7-WT	0	0.0649262	0.040173	0.229763	0	0	0.0097521	0.113615	0.0152048	0	0	0.0770824	0.0402091	0.240279	0.0701847	0.0718741	0.00250812	0	0.0244287	0	0	0	0.026	0.216012	1.00175
TCGA.AN.A04D.01	EPHA7-WT	0.112349	0	0.0681173	0.0700406	0.0293556	0	0	0.12937	0	0	0.0150199	0.0103257	0.0187197	0.109692	0.0313487	0.395015	0.00977534	0	0	0.0009	0	0	0.026	0.217165	1.00218
TCGA.UY.A9PB.01	EPHA7-WT	0.0205164	0	0.0735456	0.166487	0	0.0149766	0.0326646	0.0621421	0.049843	0	0	0.0850173	0	0.0857763	0.104291	0.274873	0.0120309	0	0.00130192	0.00894864	0	0.00758643	0.026	0.219901	0.998492
TCGA.BA.5555.01	EPHA7-WT	0.0218792	0	0.104025	0.111562	0	0.0773169	0.0322351	0.0396676	0.0416137	0	0	0.0714902	0.00884546	0.0819981	0.110585	0.166527	0.023867	0	0.0986344	0	0	0.00975401	0.026	0.223415	0.990595
TCGA.E2.A14R.01	EPHA7-MUT	0	0.020569	0.0871658	0.111177	0	0.0800351	0	0.129783	0.0148633	0.016528	0	0	0.00162375	0.198749	0.150702	0.17228	0.0033382	0	0.0131861	0	0	0	0.026	0.22642	1.00103
TCGA.86.7714.01	EPHA7-WT	0.0361879	0	0.0104957	0.0307624	0	0.113289	0	0.0009	0	0	0.00640386	0.00647774	0.0317804	0	0.00903108	0.271328	0.337524	0.026163	0.114215	0	0	0.00541355	0.026	0.214425	1.00009
TCGA.FR.A729.06	EPHA7-WT	0.066343	0	0.0427	0.348239	0	0.00444942	0	0.134951	0.0612738	0	0	0.0573868	0.0248305	0.0126242	0.113157	0.131471	0.00257495	0	0	0	0	0	0.026	0.214715	1.0154
TCGA.EE.A2GC.06	EPHA7-WT	0.0166956	0	0.10419	0.299415	0	0	0.00504478	0.0674918	0.0397996	0	0	0.0867789	0.00438677	0	0.0876584	0.264432	0	0	0.00761348	0	0	0.0164927	0.026	0.225647	1.00149
TCGA.56.8626.01	EPHA7-WT	0	0.0257445	0.0951045	0.0854146	0	0.130642	0	0.0385641	0	0	0.0307432	0.00191249	0.0364136	0.0909378	0.00631008	0.336737	0.0301915	0.0188479	0.0724367	0	0	0	0.026	0.2187	0.993414
TCGA.GU.AATP.01	EPHA7-WT	0.115475	0	0.0243553	0.130119	0	0.00782057	0	0.0734173	0.0429514	0	0	0.0219207	0.0009	0.175337	0.0233151	0.255836	0	0.104765	0.0227075	0	0	0.00103335	0.026	0.21501	0.998319
TCGA.J4.A83M.01	EPHA7-WT	0.0927768	0	0.0793564	0.166272	0	0.218696	0	0.10663	0	0	0	0.0473029	0.022162	0.0251634	0.0583956	0.129275	0	0.00391045	0.0500151	0	0	0	0.026	0.221435	0.999371
TCGA.CV.A6K1.01	EPHA7-WT	0.0328136	0	0.0940066	0.198589	0	0.0121824	0.00122955	0.0766377	0.0520722	0	0.0588177	0.0213193	0.0119834	0.0484047	0.086458	0.240891	0.00361608	0.0118618	0	0.046549	0	0.00256715	0.026	0.225772	0.994123
TCGA.86.A4P8.01	EPHA7-WT	0.0896111	0	0.0276051	0.140754	0	0.249581	0	0.0251386	0.0190629	0	0.00337133	0.051702	0.038656	0.0392931	0.0357594	0.242676	0.00379739	0	0.0285929	0	0	0.00439929	0.026	0.219164	0.995302
TCGA.25.1317.01	EPHA7-WT	0.10765	0	0.0681248	0.04806	0	0.100078	0	0.0560685	0.0326607	0	0	0.0907186	0.0487747	0.00413518	0.0637804	0.263037	0	0.00633225	0	0.0916695	0	0.0189097	0.026	0.224711	0.992517
TCGA.61.2104.01	EPHA7-WT	0.0706416	0	0.0657786	0.0462715	0	0.118946	0	0.0633738	0.0217014	0	0.0146753	0.00313098	0.0280322	0.0284141	0.0855183	0.342058	0	0.0694399	0	0.0349881	0	0.00703026	0.026	0.21993	0.995064
TCGA.XK.AAJU.01	EPHA7-WT	0.0424734	0	0.102282	0.227801	0	0	0	0.129613	0.0257196	0	0	0.0936139	0.018379	0	0.0179535	0.172408	0.00610145	0	0.163656	0	0	0	0.026	0.215867	0.999005
TCGA.GN.A4U8.06	EPHA7-WT	0.053859	0.0182259	0.037923	0.230846	0	0.0100713	0.0605259	0.0683267	0.0479865	0	0	0.0301406	0.0537032	0.0734146	0.12052	0.178357	0.009453	0	0.00664749	0	0	0	0.026	0.220528	0.995705
TCGA.UY.A8OD.01	EPHA7-WT	0.0489055	0.0217323	0.077314	0.0955301	0	0.138847	0	0.114736	0.0131558	0	0	0.0198753	0	0.211632	0.0486979	0.158304	0	0	0.0512488	0	0	0	0.026	0.221602	0.994979
TCGA.D3.A51E.06	EPHA7-WT	0	0.0381565	0.0830317	0.279056	0	0	0	0.123738	0.0444936	0	0	0.104213	0.030238	0.0757896	0.0819851	0.134717	0	0	0	0	0	0.00458199	0.026	0.225257	1.00306
TCGA.BG.A3PP.01	EPHA7-WT	0.069362	0	0.0853038	0.087324	0	0.141319	0	0.0914689	0.0464085	0	0	0.0667999	0.011179	0.0299203	0.108137	0.240742	0	0	0	0.0220354	0	0	0.026	0.221202	0.996717
TCGA.HC.7737.01	EPHA7-WT	0.0584157	0.0296702	0.0766633	0.140555	0	0.192276	0	0.0475609	0	0	0	0.128027	0.00956995	0.00138345	0.0262386	0.228808	0	0.00446069	0.0095905	0.0467806	0	0	0.026	0.2248	0.999124
TCGA.A8.A081.01	EPHA7-WT	0.0753278	0	0.0388751	0.272224	0	0.0955072	0.00214589	0.0319583	0.0368671	0	0	0.0575193	0.00824912	0.111107	0.0914197	0.142663	0.0004	0	0.0357177	0	0	0	0.026	0.216123	1.002
TCGA.ER.A19O.06	EPHA7-WT	0.0495039	0	0.0487964	0.217034	0	0	0	0.0532175	0.0584862	0	0	0.0498703	0.0604346	0.155977	0.0188779	0.278615	0	0	0.00918749	0	0	0	0.026	0.216813	0.998688
TCGA.BH.A42V.01	EPHA7-WT	0.0820481	0	0.0481124	0.123725	0	0.119589	0	0.17179	0	0	0	0.0308074	0.0350614	0.0377084	0.0488469	0.257593	0.0101163	0	0.0346023	0	0	0	0.026	0.216541	0.994723
TCGA.66.2795.01	EPHA7-WT	0.0156258	0.0225154	0.0616522	0.0749992	0	0.128566	0	0.0867859	0	0	0	0.0397352	0.0333847	0	0.0909331	0.359549	0.0498619	0	0.036391	0	0	0	0.026	0.216476	0.994404
TCGA.DD.AAVQ.01	EPHA7-WT	0.125928	0	0.00916082	0.237246	0	0.0891273	0	0.0624725	0.107296	0	0	0.0185816	0.00994944	0.0743286	0.0756364	0.176626	0.00559872	0	0.00736528	0.0007	0	0	0.026	0.221328	0.999394
TCGA.E2.A10F.01	EPHA7-WT	0.108523	0	0.0215556	0.0850148	0	0.145147	0	0.0394072	0.0236883	0	0	0.0302498	0.0198492	0.047765	0.0573955	0.356024	0.00816172	0	0.0535246	0	0	0.00369421	0.026	0.217683	0.993607
TCGA.A2.A0D3.01	EPHA7-WT	0.117793	0	0.0299184	0.215542	0	0.162744	0	0.0989881	0.0222688	0.0112944	0	0.0490109	0.00213369	0	0.0609287	0.190537	0.0185822	0	0.0189224	0	0	0.00133659	0.026	0.218202	1.00304
TCGA.05.4382.01	EPHA7-WT	0.0334183	0	0.0743595	0.0575256	0	0.0871234	0.0143885	0.0191728	0.0580563	0	0.0040969	0.0005	0.0151321	0.044298	0.0541909	0.475659	0.00878609	0	0	0.0458502	0	0.00746161	0.026	0.222515	0.999775
TCGA.BR.4267.01	EPHA7-WT	0.0452999	0	0.0967017	0.0257759	0	0.199952	0	0.00640364	0.0162517	0	0	0.00239778	0	0.0450718	0.0151923	0.280414	0.00222226	0.0232732	0	0.167102	0	0.0739419	0.026	0.222537	0.995574
TCGA.21.1075.01	EPHA7-WT	0.00800083	0.00225254	0.137786	0.0641175	0	0.0110661	0	0.0416691	0	0	0.0914106	0	0.0385398	0.0654043	0.0165459	0.290192	0.0363264	0.0553557	0	0.140262	0	0.00107156	0.026	0.218522	0.999378
TCGA.OL.A6VQ.01	EPHA7-WT	0.13228	0	0.0219094	0.0999924	0	0.255302	0	0.00487937	0	0	0	0.0660871	0.0294736	0	0.0531961	0.152178	0.0666319	0.00874758	0.0834152	0.0259078	0	0	0.026	0.221003	0.990798
TCGA.BR.7717.01	EPHA7-WT	0.132579	0.0417895	0	0.177756	0	0.19452	0	0.0661794	0.00604997	0	0	0.0311885	0.0300599	0.0261163	0.0355896	0.238622	0	0	0	0.0195501	0	0	0.026	0.22314	0.997133
TCGA.G2.A3VY.01	EPHA7-MUT	0	0.162206	0.0133836	0.165673	0.301311	0	0	0	0	0	0.0122483	0	0.00779687	0	0	0.121303	0.0500263	0.125159	0	0.040893	0	0	0.026	0.219455	0.999412
TCGA.EB.A6QY.01	EPHA7-WT	0	0.0152094	0.12349	0.205795	0	0	0	0.154423	0.0418827	0	0	0.0449153	0.0178166	0.0507939	0.0628742	0.238591	0.0329731	0	0.0112349	0	0	0	0.026	0.221177	0.996498
TCGA.AR.A24T.01	EPHA7-WT	0.0823504	0	0.042617	0.0958056	0	0.0774474	0	0.0206763	0.00484203	0	0	0.0605438	0.00774569	0	0.0306324	0.322226	0.00417795	0	0.246407	0	0	0.00452769	0.026	0.21955	0.993242
TCGA.CG.5717.01	EPHA7-WT	0.0929563	0.065246	0	0.137477	0	0.202123	0	0.0164012	0.0831193	0	0.0184172	0	0.054355	0.00724121	0.114178	0.143722	0	0.00401461	0.0571107	0	0	0.00363917	0.026	0.226499	0.993525
TCGA.A8.A076.01	EPHA7-WT	0.0884654	0	0.0545843	0.0468311	0	0.047144	0	0.0387652	0.0272115	0	0.0003	0	0	0.146072	0.0389706	0.398697	0.0129887	0	0.0693125	0	0	0.0306929	0.026	0.225719	0.99881
TCGA.D6.A6EN.01	EPHA7-WT	0	0.108127	0	0.334857	0	0.0340778	0.0793561	0.0732674	0.0313764	0	0.0202149	0.00554976	0.014266	0	0.0619181	0.17019	0.0208965	0.00266163	0	0.0354065	0	0.00783448	0.026	0.223339	0.999026
TCGA.EW.A2FW.01	EPHA7-WT	0.0848728	0	0.0500702	0.0940931	0	0.0386428	0	0.0327267	0.0240186	0	0	0.0216807	0	0.162552	0.0672166	0.332133	0	0	0.0919935	0	0	0	0.026	0.221908	0.996369
TCGA.EE.A3JE.06	EPHA7-WT	0	0.0640974	0.034907	0.384072	0	0	0.0307779	0.0886858	0.0387407	0	0	0.0654632	0.016139	0.0953694	0.054081	0.119387	0.00729604	0	0	0	0.001	0	0.026	0.221685	1.00757
TCGA.L4.A4E5.01	EPHA7-WT	0.00272301	0.0129329	0.098683	0.140378	0	0.0458646	0	0.0623818	0.0696719	0	0	0	0	0.157566	0.0330283	0.335303	0.00836685	0	0	0.0261662	0	0.00693506	0.026	0.218944	1.00036
TCGA.N5.A4RJ.01	EPHA7-WT	0	0.0151473	0.124299	0.171824	0	0.0385628	0	0.123458	0	0	0	0.093846	0.0435028	0.0154384	0.0335574	0.338035	0	0	0	0.00233009	0	0	0.026	0.218019	1.00048
TCGA.G9.6379.01	EPHA7-WT	0.0215401	0.0113786	0.0912538	0.237609	0	0.0143308	0	0.104668	0.0545945	0	0.0739816	0	0.0423378	0.0217554	0.0657914	0.227249	0.0116969	0	0.0211589	0.0007	0	0	0.026	0.221537	0.995945
TCGA.A1.A0SI.01	EPHA7-WT	0.0728665	0	0.0367111	0.17234	0	0.0811714	0	0.121845	0.00604381	0	0	0.0316366	0.00240025	0.181316	0.0630874	0.154958	0	0	0.0756235	0	0	0	0.026	0.215966	0.99605
TCGA.24.2019.01	EPHA7-WT	0.0795867	0	0.0649169	0.226612	0	0.0700729	0	0.139639	0.061177	0	0	0.0855332	0.0315493	0.0153466	0.0531603	0.157502	0	0	0	0.0109169	0	0.00398688	0.026	0.215286	1.00605
TCGA.61.1741.01	EPHA7-WT	0.0641095	0	0.072592	0.0720618	0	0.106245	0	0.0909526	0.0701932	0	0.00883148	0.00258165	0.0169136	0.124212	0.088143	0.283163	0	0	0	0	0	0	0.026	0.223413	0.995231
TCGA.Z2.A8RT.06	EPHA7-WT	0.033542	0.091704	0.0118537	0.168823	0	0.0910409	0	0.122928	0.0635799	0	0	0.031862	0.0557672	0.0200735	0.0782491	0.218416	0.00744267	0	0.00471848	0	0	0	0.026	0.223623	0.994113
TCGA.A2.A0T6.01	EPHA7-WT	0.102932	0	0	0.0854483	0	0.106399	0	0.111709	0.00356148	0	0	0.0615049	0	0.032591	0.051562	0.172789	0.00604173	0	0.260914	0	0	0.0045466	0.026	0.220505	0.992889
TCGA.LL.A5YL.01	EPHA7-WT	0.0478074	0.018077	0.0411065	0.20428	0	0	0	0.166925	0.0320819	0.00125664	0	0.0334194	0.0443868	0.0344147	0.0306606	0.230775	0.00365502	0.0203342	0.0908199	0	0	0	0.026	0.221569	0.990225
TCGA.85.8048.01	EPHA7-WT	0.010414	0.0770836	0.0247724	0.127381	0	0.149992	0	0.1396	0.00490908	0	0	0.0577676	0.0191435	0.068912	0.0893754	0.217869	0	0.00486675	0	0.00787706	0	0	0.026	0.224429	0.995069
TCGA.N9.A4PZ.01	EPHA7-WT	0.0063512	0.0877266	0.00831403	0.0466917	0	0	0	0.0741767	0.00598945	0	0	0.0234312	0	0.315629	0.028882	0.387445	0	0	0.0153637	0	0	0	0.026	0.214794	1.02572
TCGA.EJ.5498.01	EPHA7-WT	0.0892859	0	0.0753213	0.167609	0	0.236872	0	0.0266023	0	0	0	0.0587255	0.0311481	0	0.0523891	0.155184	0	0	0.0603654	0.0429602	0	0.0035367	0.026	0.224268	0.995219
TCGA.AC.A3YI.01	EPHA7-WT	0.091672	0	0.0498938	0.0644979	0	0	0	0.0462777	0.0026901	0	0	0.0168667	0.0337004	0.383427	0.0238561	0.150293	0	0	0.0442181	0.0926078	0	0	0.026	0.215208	1.01962
TCGA.F7.A61S.01	EPHA7-WT	0.0281145	0	0.0696499	0.17877	0	0.0312275	0.00391172	0.0851536	0.0101376	0	0.0120301	0.0414105	0.00233594	0.0688549	0.106086	0.24669	0	0.0796057	0	0.0360209	0	0	0.026	0.220259	0.998686
TCGA.LA.A446.01	EPHA7-WT	0.132936	0	0.00916938	0.0949779	0	0.0651668	0	0.0958386	0	0	0.0617202	0	0.0303437	0.151248	0.00555581	0.276758	0	0.00515719	0.0268633	0.044235	0	0	0.026	0.215021	0.997435
TCGA.EO.A3KU.01	EPHA7-WT	0.093963	0	0.0711348	0.0670164	0	0.0639751	0	0.157671	0	0	0	0.0712324	0	0.115581	0.00769976	0.170492	0	0.181236	0	0	0	0	0.026	0.222851	0.995176
TCGA.BH.A0AV.01	EPHA7-WT	0.0610864	0	0.0314785	0.0292532	0	0.0559405	0	0.0141602	0.0370857	0	0.0104403	0	0	0.429579	0.0178673	0.304032	0	0	0	0.0090774	0	0	0.026	0.220445	1.03616
TCGA.09.2054.01	EPHA7-WT	0.0613012	0.0290874	0.0683549	0.079089	0	0.012244	0	0.150417	0.0185261	0	0	0.0918754	0.0494565	0.0488106	0.0286186	0.322873	0	0	0.0393456	0	0	0	0.026	0.226028	0.990933
TCGA.CD.5803.01	EPHA7-WT	0.0183463	0.0830711	0	0.25502	0	0.142261	0.0109105	0.0346476	0.11416	0	0	0.0101375	0.045257	0	0.100742	0.153674	0.00750831	0	0.0242645	0	0	0	0.026	0.21932	1.00255
TCGA.B6.A0RM.01	EPHA7-WT	0	0.0779793	0.0582644	0.140579	0	0.0286603	0	0.0236534	0.013644	0	0	0.0347866	0.0187928	0	0.00713196	0.285836	0.00762773	0.014603	0.288441	0	0	0	0.026	0.22274	0.993337
TCGA.13.1404.01	EPHA7-WT	0	0.0359641	0.0850975	0.0876037	0	0.0315064	0	0.122677	0.0316249	0	0	0.0377057	0.0695722	0.0281216	0.0416581	0.38886	0.00430811	0	0	0.0353013	0	0	0.026	0.22047	0.995002
TCGA.58.A46L.01	EPHA7-WT	0.0778493	0	0.0485347	0.157664	0	0.157404	0	0.0812723	0	0	0	0.0871569	0.00189526	0.0659996	0.119167	0.123965	0.0484209	0	0.0306701	0	0	0	0.026	0.225335	0.996738
TCGA.CV.5966.01	EPHA7-WT	0	0.0686893	0	0.108321	0	0.109493	0.0732364	0	0	0	0.00939426	0.102818	0.0328465	0.0004	0.0724035	0.285278	0	0.137165	0	0	0	0	0.026	0.219727	0.999944
TCGA.F1.A72C.01	EPHA7-WT	0.0847777	0.00541364	0.0630868	0.173059	0	0.0631328	0	0.0954481	0.0216137	0	0	0.153246	0.00894751	0.0332425	0.083463	0.190096	0.00666554	0	0.00114723	0.013854	0	0.00280584	0.026	0.217232	1.00637
TCGA.B6.A1KI.01	EPHA7-WT	0.0898509	0	0.073018	0.0714062	0	0	0	0.113605	0	0	0	0.0278288	0	0.129218	0.0515044	0.321198	0	0	0.112941	0	0	0.00942927	0.026	0.219881	0.994689
TCGA.KK.A59Y.01	EPHA7-WT	0.116463	0.0175908	0.0466026	0.0951716	0	0.155411	0	0.1344	0.0078694	0	0	0.054261	0.023441	0.0445392	0.0432615	0.17626	0.00819723	0	0.0765326	0	0	0	0.026	0.223135	0.991074
TCGA.E2.A1BC.01	EPHA7-WT	0.14405	0	0.0377675	0.0566094	0	0.127074	0	0.0952171	0	0	0	0.136858	0	0	0.0320189	0.242214	0.0448457	0	0.0247475	0.0538869	0	0.00471197	0.026	0.214834	0.998991
TCGA.KK.A59V.01	EPHA7-WT	0.0590885	0	0.0342237	0.320597	0	0	0.0666922	0.202087	0.0659663	0	0	0.0417401	0.0274205	0.0169859	0.0820012	0.0568218	0.0112919	0	0.0150834	0	0	0	0.026	0.216319	1.01535
TCGA.UF.A7J9.01	EPHA7-MUT	0.0396863	0	0.0475969	0.0497544	0	0.0876144	0	0.0277846	0.0247678	0	0.0198229	0.0253174	0	0.316962	0.0185884	0.310199	0	0	0	0.031906	0	0	0.026	0.221506	1.01394
TCGA.CN.6011.01	EPHA7-WT	0	0.00163188	0	0.151932	0	0.159154	0	0	0.0001	0	0.0150595	0.118022	0.0286649	0.149074	0.0556965	0.235886	0	0.0281482	0.0561721	0	0	0.0005	0.026	0.225116	0.999899
TCGA.BR.4255.01	EPHA7-WT	0.0645639	0	0.0543919	0.126627	0	0.259425	0	0.0174197	0.0194496	0	0	0.021401	0.00587513	0	0.0491904	0.318587	0.0147255	0	0.0463281	0	0	0.0020148	0.026	0.225568	0.991717
TCGA.EO.A3AZ.01	EPHA7-WT	0	0.0384628	0.0230396	0.23577	0	0	0.0602362	0.0406716	0.0426542	0	0.0424352	0.0500656	0	0.112639	0.0763182	0.203647	0.0100795	0	0.0639822	0	0	0	0.026	0.214779	0.99755
TCGA.MN.A4N1.01	EPHA7-WT	0.0222888	0.0236139	0.100203	0.0300071	0	0.034195	0	0.0669236	0.0230329	0	0.0334256	0	0.0871554	0.230255	0	0.29918	0	0.0487446	0	0.001	0	0	0.027	0.213863	1.00765
TCGA.60.2719.01	EPHA7-WT	0.0536194	0	0.0533626	0.0961289	0	0.151935	0	0.0209264	0.00325284	0	0.00751412	0.00952704	0.0566206	0.113804	0.0733044	0.337495	0	0	0.019459	0	0	0.00305034	0.027	0.213899	0.998931
TCGA.ER.A3EV.06	EPHA7-WT	0.0564296	0	0.0885517	0.277074	0	0	0	0.145234	0.0019365	0	0	0.13825	0.018971	0.00669335	0.0212752	0.214067	0.0253184	0	0	0.00619967	0	0	0.027	0.213575	1.01138
TCGA.LL.A73Y.01	EPHA7-WT	0.0815467	0.00329973	0	0.0288376	0	0.0680729	0.0111804	0.13705	0.0222652	0.0126206	0	0.0264325	0	0.277521	0.0288494	0.247349	0.0446008	0	0.0103735	0	0	0	0.027	0.213526	1.00733
TCGA.GC.A3WC.01	EPHA7-WT	0.0281003	0.0578271	0.0126174	0.166035	0	0.0454183	0.0413247	0.0830542	0.0298789	0	0	0.0408842	0.00660413	0.0113598	0.140658	0.222369	0.0887456	0	0.0251227	0	0	0	0.027	0.214	0.997821
TCGA.BH.A1F0.01	EPHA7-MUT	0.039128	0.0443559	0.0253475	0.0779444	0	0.177024	0	0.0451024	0.00330795	0	0	0.026566	0.0249161	0.0503365	0.095273	0.375686	0	0	0.00921552	0	0	0.00579621	0.027	0.213785	0.999682
TCGA.A2.A0EP.01	EPHA7-WT	0.0735538	0.00809315	0.00805903	0.0732779	0	0.150133	0.0290154	0.089562	0.0372542	0	0	0.00185405	0.0486114	0.160411	0.0262581	0.255033	0.0181022	0	0.0006	0.0201869	0	0	0.027	0.213387	0.997801
TCGA.GM.A2DC.01	EPHA7-WT	0.0981065	0	0.0473903	0.157764	0	0.00810882	0	0.140448	0.00708402	0	0	0.049426	0.00605748	0	0.120634	0.259475	0	0	0.105505	0	0	0	0.027	0.213538	0.997303
TCGA.CD.5813.01	EPHA7-WT	0.0830355	0	0.0288092	0.209498	0	0.019977	0	0.0948074	0.102568	0	0	0.0982421	0.0641259	0.0412399	0.0379789	0.159136	0.0389564	0	0	0.0216251	0	0	0.027	0.213688	0.99977
TCGA.VN.A88I.01	EPHA7-WT	0.0624123	0.0165074	0.0444945	0.155857	0	0.155303	0	0.0566849	0.01482	0	0	0.0950199	0.00847549	0	0	0.131545	0	0.00690077	0.251981	0	0	0	0.027	0.213789	1.0017
TCGA.JL.A3YX.01	EPHA7-WT	0.0628692	0	0.0640169	0.122622	0	0.0311726	0	0.0814175	0	0	0	0.0532432	0.0210849	0	0.00752328	0.229889	0	0.00137551	0.324786	0	0	0	0.027	0.21389	1.00033
TCGA.97.8552.01	EPHA7-WT	0	0.0985502	0.00341647	0.0496041	0	0.114436	0	0.0372074	0	0	0.0139964	0	0.111875	0	0.00785882	0.439022	0.0642724	0.0136798	0.046081	0	0	0	0.027	0.21338	0.999527
TCGA.BA.A6DI.01	EPHA7-WT	0	0.0207427	0.110129	0.154691	0	0.0875227	0	0.0533538	0	0	0.026196	0	0.0223083	0.143375	0.138448	0.0964136	0.0207159	0.0428629	0	0.0820626	0	0.00117754	0.028	0.213097	1.00443
TCGA.D5.6930.01	EPHA7-MUT	0.130114	0	0	0.129533	0	0.231061	0	0.0623999	0.027563	0	0.002971	0.0269645	0	0.120899	0.0897294	0.135998	0	0	0	0.0427668	0	0	0.028	0.213005	1.00237
TCGA.BT.A20T.01	EPHA7-WT	0	0.149195	0	0.253448	0	0	0.00590334	0.184605	0.0403648	0	0	0.0698911	0.0201726	0.0508878	0.0304293	0.136037	0.00717958	0.0293453	0.0202987	0	0.00224292	0	0.028	0.21297	1.00398
TCGA.A8.A07S.01	EPHA7-WT	0.0110198	0.00878779	0	0.0885336	0	0.0065294	0.00269499	0.0993082	0.0420971	0	0.0646255	0	0.0405507	0.13124	0.0152722	0.368435	0.0105973	0	0.110104	0	0	0.0002	0.028	0.213305	0.999964
TCGA.E9.A3HO.01	EPHA7-WT	0.0564412	0	0.0648187	0.153713	0	0.182675	0	0.127714	0.0253112	0	0	0.0494969	0.0186256	0.0312761	0.0644085	0.175344	0.0057912	0	0.0443844	0	0	0	0.029	0.209089	1.00166
TCGA.EE.A2GB.06	EPHA7-WT	0.103605	0	0.0576807	0.146858	0	0	0	0.076329	0.0201423	0	0.00611287	0.0121718	0.0121774	0.0145816	0.124039	0.400778	0.0141969	0	0.0113265	0	0	0	0.029	0.208742	1.00605
TCGA.F5.6863.01	EPHA7-WT	0.106239	0	0.0586406	0.0722882	0	0.11662	0	0.111236	0.0004	0	0	0.0334238	0	0.212891	0.0386966	0.219136	0	0.0175755	0.0128463	0	0	0	0.029	0.203191	1.00522
TCGA.22.5478.01	EPHA7-WT	0.0102975	0.0711857	0.0358059	0.036696	0	0.106354	0	0.0794337	0	0	0	0.0217707	0	0.276493	0.0472105	0.283128	0	0	0.0316249	0	0	0	0.029	0.203938	1.01254
TCGA.58.A46J.01	EPHA7-WT	0.0705035	0	0.0379718	0.0700346	0	0.087673	0	0.12122	0	0	0	0.0195113	0.0360172	0	0.0178303	0.383385	0	0.0803094	0.0458481	0	0	0.0296962	0.029	0.21077	0.995144
TCGA.PG.A917.01	EPHA7-WT	0.0562575	0	0.0516282	0.353431	0	0	0	0.114415	0.046044	0	0	0.0847703	0.00588081	0.00548895	0.100099	0.163881	0	0	0.0181037	0	0	0	0.029	0.20813	1.01757
TCGA.56.7579.01	EPHA7-WT	0.0766061	0	0.05098	0.0261211	0	0.00323245	0	0.0211682	0.0142359	0	0.0199548	0	0	0.283115	0.013473	0.424395	0.0442532	0	0.00878429	0	0	0.0136813	0.029	0.211429	1.03137
TCGA.77.7463.01	EPHA7-WT	0.103176	0	0.0449131	0.0559496	0	0.0591447	0.00640523	0.0316469	0.0222411	0	0.0198233	0	0.0128528	0.173337	0.0415368	0.204159	0.0810909	0	0	0.129814	0	0.013909	0.029	0.212121	1.00053
TCGA.CV.6943.01	EPHA7-WT	0.0105423	0	0.0588372	0.302068	0	0.0458468	0	0.0757403	0.0438172	0	0	0.0691476	0.00737961	0	0.170412	0.151246	0	0	0.0633479	0	0	0.00161494	0.029	0.20716	1.01825
TCGA.44.3919.01	EPHA7-WT	0.0812623	0	0.0211241	0.0604474	0	0.173143	0	0.0482212	0.0397078	0	0.0461673	0	0	0.00512905	0.130246	0.261629	0.0719431	0	0.06098	0	0	0	0.029	0.206659	0.99815
TCGA.KQ.A41P.01	EPHA7-WT	0.0570849	0	0.0603235	0.0605429	0	0	0	0.0531243	0.0148424	0	0	0.0217256	0.00986782	0.284089	0.0226722	0.356018	0	0.00678905	0.0529203	0	0	0	0.029	0.205233	1.02044
TCGA.B7.A5TI.01	EPHA7-WT	0.105713	0	0.0442415	0.0757785	0	0.141045	0	0.0784621	0.0412734	0	0	0.035877	0.00196891	0.038766	0.123612	0.29206	0	0	0.0210127	0.0002	0	0	0.029	0.211025	1.00061
TCGA.63.6202.01	EPHA7-WT	0.0669491	0	0.0190643	0.159473	0	0.118819	0.0603855	0.0464961	0.0216895	0	0	0.0413347	0.0191823	0.0222239	0.0757941	0.286442	0.0262422	0	0.0248779	0	0	0.0110259	0.029	0.20345	0.998922
TCGA.YF.AA3M.01	EPHA7-WT	0	0.048516	0.0776061	0.0984973	0.0659042	0	0	0.10715	0.0121268	0	0	0.0395163	0.00283281	0.030924	0	0.258706	0.00979424	0.0927623	0.121844	0.00907842	0	0.0247417	0.029	0.204515	0.993611
TCGA.25.1625.01	EPHA7-MUT	0.0666158	0	0.071222	0.0412498	0	0.101733	0	0.0453428	0.0165183	0	0	0.0970121	0.062763	0	0.0308021	0.364174	0	0.013667	0	0.0791033	0	0.0097978	0.029	0.210085	0.999881
TCGA.A2.A0SX.01	EPHA7-WT	0.0204372	0.0392209	0.0280949	0.110566	0	0.222312	0	0.0903591	0.0420639	0	0	0.00680705	0	0.279446	0.0802914	0.0747661	0	0	0.00563629	0	0	0	0.029	0.206911	1.01063
TCGA.55.7724.01	EPHA7-WT	0.0217808	0.0331195	0.0283515	0.0943375	0	0.14238	0	0.0313288	0	0	0	0.0465691	0.0179627	0.0244861	0.0570969	0.352382	0.0366469	0.0161881	0.0851761	0	0	0.0121942	0.029	0.204762	0.996714
TCGA.FP.8099.01	EPHA7-WT	0.047195	0	0.079636	0.047228	0	0.071716	0	0.0665552	0.0631521	0	0	0.0412353	0.0133694	0.112228	0.0632679	0.304374	0	0.0566484	0.0251315	0	0	0.00826315	0.029	0.21142	0.997709
TCGA.G2.A2ES.01	EPHA7-WT	0.00324096	0.00601113	0.00185105	0.0915852	0	0.158592	0.0507936	0.0828504	0	0	0.0464718	0.0146408	0.0239662	0.0824097	0.0984914	0.18146	0	0.0809956	0	0.0740897	0	0.00255058	0.029	0.202475	1.00531
TCGA.13.0890.01	EPHA7-WT	0.10378	0	0.0347423	0.0807841	0	0.0686828	0	0.0777868	0.0349635	0	0	0.0732733	0.0305535	0.0388459	0.0649049	0.379404	0	0	0	0.0122784	0	0	0.029	0.202869	1.00374
TCGA.55.8615.01	EPHA7-WT	0.015229	0.026142	0.102916	0.0391902	0	0	0	0.147643	0.0020249	0	0.0114912	0	0.0278334	0.326896	0.00571174	0.26633	0	0.0214824	0.00710978	0	0	0	0.029	0.205189	1.02191
TCGA.VQ.A8PH.01	EPHA7-WT	0.00190062	0.0938274	0.0347094	0.294579	0	0.089837	0	0.186436	0.103981	0	0	0.0439995	0.0236395	0.0558918	0.00117563	0.00926541	0.00551603	0.0115869	0	0.0436546	0	0	0.029	0.204406	1.02754
TCGA.RD.A8NB.01	EPHA7-WT	0.137179	0	0	0.0804557	0	0.206234	0	0.135161	0.0324161	0	0	0.0555272	0.0100752	0.00218174	0.179422	0.134425	0.00184164	0	0.0159248	0	0	0.00915587	0.029	0.202566	1.01823
TCGA.D8.A1JG.01	EPHA7-WT	0.0140464	0	0.0846897	0.0568075	0	0.174744	0	0.0449777	0.0153799	0	0	0.0567576	0	0.0394615	0.121665	0.320561	0.019981	0	0.0412563	0	0	0.00967218	0.029	0.207752	1.00103
TCGA.R5.A7ZR.01	EPHA7-WT	0	0.0790737	0.0535111	0.0506243	0	0.266806	0	0.0446929	0.0381208	0	0.0270054	0	0.00973247	0.0416792	0.0826953	0.22826	0	0.00678984	0	0.0710097	0	0	0.029	0.202844	1.00031
TCGA.QK.A6V9.01	EPHA7-WT	0.0180987	0.0719672	0.0006	0.223899	0	0	0.0482929	0.186364	0.0605267	0	0.0116203	0	0	0.0692709	0.221407	0.0879798	0	0	0	0	0	0	0.029	0.205746	1.02736
TCGA.AR.A2LN.01	EPHA7-WT	0.0763224	0	0.0441618	0.0815656	0	0.154684	0	0.0391765	0.0025857	0	0	0.066879	0.0244104	0	0.031769	0.249389	0	0	0.215948	0.0102219	0	0.00288591	0.029	0.209453	0.995205
TCGA.AJ.A3NC.01	EPHA7-WT	0.084345	0	0.0753668	0.089888	0	0.0984647	0	0.111772	0.0372408	0	0	0.0428058	0	0.0539537	0.0116445	0.15668	0	0.0170791	0	0.0588551	0	0.161905	0.029	0.201986	1.00344
TCGA.EW.A1PA.01	EPHA7-WT	0	0.0881015	0.0276389	0.0767849	0	0.106261	0	0.0689299	0.00827217	0	0	0.0307286	0	0.0681953	0.116914	0.167432	0.00249475	0	0.238247	0	0	0	0.029	0.206136	0.998605
TCGA.63.A5MJ.01	EPHA7-WT	0.0664875	0	0.059438	0.0948715	0	0.0577402	0.017535	0.0432931	0.00333936	0	0.0363948	0	0	0.164313	0.071473	0.271418	0	0	0	0.113697	0	0	0.029	0.203918	1.00608
TCGA.62.A470.01	EPHA7-WT	0	0.0165074	0.101903	0.0626877	0	0.0423111	0	0.0348504	0	0	0.011282	0	0.0117875	0.0944164	0.0229473	0.549652	0.0140275	0.0134265	0.00964236	0.00603356	0	0.00852509	0.029	0.203217	1.02261
TCGA.21.1081.01	EPHA7-WT	0	0.00595754	0.116599	0.0705018	0	0.110672	0	0.0301357	0	0	0.0677067	0	0.0293873	0.13595	0	0.297265	0	0.0173653	0	0.0932563	0	0.0252037	0.029	0.212669	1.00115
[truncated: 3,977 more rows]

## Sheet: p < 0.05
Input Sample	group	B cells naive	B cells memory	Plasma cells	T cells CD8	T cells CD4 naive	T cells CD4 memory resting	T cells CD4 memory activated	T cells follicular helper	T cells regulatory (Tregs)	T cells gamma delta	NK cells resting	NK cells activated	Monocytes	Macrophages M0	Macrophages M1	Macrophages M2	Dendritic cells resting	Dendritic cells activated	Mast cells resting	Mast cells activated	Eosinophils	Neutrophils	P-value	Pearson Correlation	RMSE
TCGA.CC.A3MA.01	EPHA7-WT	0.048537	0	0.0101592	0.0660174	0	0	0	0.0334151	0.0075606	0	0.0128801	0	0	0.451987	0.0638155	0.27989	0	0	0.0189381	0	0	0.00679932	0	0.700244	0.723226
TCGA.IQ.A61O.01	EPHA7-WT	0	0.00864807	0.00888987	0.0321362	0	0.00786251	0	0.0424345	0.0216064	0	0	0.00297624	0	0.388611	0.036619	0.412693	0	0	0	0.0375227	0	0	0	0.705351	0.71655
TCGA.GS.A9TT.01	EPHA7-WT	0.141079	0.484038	0	0.0165248	0	0.0338023	0.0626692	0.0309887	0	0	0.0197523	0	0	0.139404	0.0236615	0.0400054	0	0	0.00590373	0	0	0.00217103	0	0.646412	0.762905
TCGA.CV.6933.01	EPHA7-WT	0.00957519	0	0.00595194	0.00973558	0	0.0441853	0	0.0126379	0.00571722	0	0.0343022	0	0.0167257	0.669223	0.00325663	0.174063	0	0.00461753	0	0.0100083	0	0	0	0.784444	0.626335
TCGA.IQ.7631.01	EPHA7-WT	0	0	0.0305684	0.0285269	0.00356055	0.00991036	0	0.0249156	0.0253769	0	0.071675	0	0	0.601512	0.012981	0.143457	0	0	0	0.0475166	0	0	0	0.737318	0.682352
TCGA.N8.A4PI.01	EPHA7-WT	0	0.0108022	0	0	0.0279431	0	0	0.0455154	0.00216609	0.0529601	0.00321695	0.0114531	0	0.45376	0.0005	0.391663	0	0	0	0	0	0	0	0.725841	0.695081
TCGA.N8.A4PL.01	EPHA7-WT	0.00292036	0	0	0.00532189	0	0	0	0.0888348	0.0373671	0.0134244	0	0	0.0119666	0.572957	0.0378191	0.14311	0	0	0	0.0862788	0	0	0	0.71363	0.704999
TCGA.LA.A7SW.01	EPHA7-WT	0	0.022173	0.0100377	0.0111359	0.0676603	0	0.0525494	0.00142436	0	0	0.0433517	0	0	0.344022	0	0.313563	0	0.0521968	0	0.0553335	0	0.0265525	0	0.676271	0.750785
TCGA.CN.4737.01	EPHA7-WT	0	0.00774561	0.0117663	0.0132719	0	0	0	0.0806303	0.00267518	0	0.0171467	0	0	0.539444	0	0.279665	0	0.0365818	0.00144313	0.00963024	0	0	0	0.738442	0.681211
TCGA.D3.A3MO.06	EPHA7-WT	0	0.0117868	0	0	0.0109691	0	0	0.0164698	0.0110769	0	0.0374522	0	0	0.84194	0.00199392	0.0683112	0	0	0	0	0	0	0	0.772857	0.637409
TCGA.DK.AA6T.01	EPHA7-WT	0.0698184	0.579083	0	0.0975541	0	0	0.00985588	0.0547991	0.0174949	0	0	0.033274	0.00528808	0	0.0010532	0.0676101	0	0.0513138	0.012855	0	0	0	0	0.622371	0.782192
TCGA.ER.A1A1.06	EPHA7-WT	0.214817	0.270135	0.0548097	0.0622653	0	0.0559012	0.00492208	0.111077	0.0616134	0	0.00510317	0	0.00608747	0.0403181	0.0062035	0.0987021	0	0.00804429	0	0	0	0	0	0.622987	0.782646
TCGA.UF.A71A.01	EPHA7-WT	0	0.00948101	0.0251032	0.0246333	0.0135012	0.151351	0	0	0	0	0.0383243	0	0	0.313086	0.0244973	0.364125	0.00692309	0	0	0.0289741	0	0	0	0.648484	0.771437
TCGA.N5.A59E.01	EPHA7-WT	0	0.0462822	0.0166536	0.101714	0	0	0	0.0634592	0.0395145	0.02082	0	0	0	0.453756	0	0.256712	0	0	0	0.00108812	0	0	0	0.699233	0.727279
TCGA.N5.A4RS.01	EPHA7-WT	0.0006	0.0119983	0	0.0869938	0	0	0	0.102767	0	0	0	0.0691083	0	0.549296	0.0102296	0.147863	0	0	0.0211212	0	0	0	0	0.701637	0.719709
TCGA.NF.A4X2.01	EPHA7-WT	0	0.00543729	0	0.0438462	0	0	0.0768061	0.0297504	0.0110127	0	0.0277413	0	0	0.321192	0	0.475998	0	0	0.00820589	0	0	0	0	0.656261	0.759651
TCGA.BB.A6UO.01	EPHA7-WT	0	0.0279777	0	0.026299	0	0.0564983	0.0105263	0.0327296	0.0332977	0	0.0593425	0.00586069	0	0.401322	0.0334068	0.235243	0.00464076	0	0	0.0656907	0	0.00716519	0	0.701356	0.731191
TCGA.CV.7102.01	EPHA7-WT	0.00782705	0	0	0.0430016	0	0.0838473	0.00749605	0.002913	0	0	0.0389506	0	0.0418145	0.27397	0.104195	0.366534	0.00938387	0	0.0200671	0	0	0	0	0.647194	0.771649
TCGA.AR.A1AN.01	EPHA7-WT	0.0265172	0	0.001823	0.0411337	0	0.0787805	0	0.0452454	0.0117362	0	0	0.0318968	0	0.415118	0.0326535	0.235767	0.0364312	0	0.0428969	0	0	0	0	0.706337	0.727973
TCGA.AC.A7VC.01	EPHA7-WT	0.0102382	0	0	0	0	0.0531749	0	0.0658806	0.00453182	0.0502539	0	0.0184615	0	0.354233	0.0006	0.349388	0.0403812	0	0.0529013	0	0	0	0	0.692747	0.736758
TCGA.AC.A2QJ.01	EPHA7-WT	0	0.0115991	0.00753413	0.0175641	0	0	0	0.0898217	0	0.0125226	0	0.00720191	0.0390648	0.270307	0.0180069	0.505614	0	0	0.020764	0	0	0	0	0.674396	0.746528
TCGA.D3.A2JA.06	EPHA7-WT	0.00100202	0	0.0102712	0.0541511	0	0.117595	0	0.0428909	0.00407472	0	0	0.0264212	0	0.239054	0.0518698	0.42728	0	0	0.0253893	0	0	0	0	0.636558	0.781761
TCGA.AC.A5EH.01	EPHA7-WT	0	0.0166334	0	0.0478241	0	0.03237	0	0.0662404	0.0650759	0	0.038672	0	0	0.293878	0.030954	0.347988	0	0	0.042877	0.0174866	0	0	0	0.65862	0.76896
TCGA.E9.A1N4.01	EPHA7-WT	0.0359667	0.00381609	0	0.0476846	0	0.11235	0	0.0133485	0.00490276	0	0	0	0	0.224209	0.0589963	0.418449	0	0	0.0802765	0	0	0	0	0.632177	0.787047
TCGA.FS.A1ZC.06	EPHA7-WT	0	0.00516908	0	0	0	0	0	0.0580521	0	0.0450854	0.0287397	0	0	0.576112	0	0.260376	0.0176322	0	0	0.0088344	0	0	0	0.729815	0.687108
TCGA.UF.A7JA.01	EPHA7-WT	0.0041282	0.0002	0	0.114664	0	0.0278277	0	0.10827	0.00463794	0	0.0206182	0	0	0.445333	0.00341953	0.144321	0	0.00762818	0	0.111315	0	0.00767012	0	0.701642	0.727696
TCGA.CQ.7072.01	EPHA7-WT	0.00229962	0	0	0.0305712	0.0104914	0	0	0.047077	0.0621876	0	0.0689525	0	0	0.30136	0	0.336585	0.0250014	0.0531179	0	0.0536588	0.00869727	0	0	0.639053	0.778639
TCGA.AN.A0FV.01	EPHA7-WT	0.0472141	0	0.0021607	0.011649	0	0.0025209	0	0.0272598	0.0185375	0	0	0.0187342	0	0.380782	0.0368659	0.356837	0	0	0.0849614	0	0	0.0124767	0	0.671324	0.748917
TCGA.A7.A3IY.01	EPHA7-WT	0.009847	0	0.00126648	0.00347638	0	0.0120836	0	0.0391068	0.0457572	0.00468183	0	0.0406423	0.00634936	0.347979	0.0246569	0.289549	0	0	0	0.174604	0	0	0	0.698046	0.727276
TCGA.BA.6868.01	EPHA7-WT	0.0643439	0	0.0289692	0.0357642	0.0838449	0	0	0.00641312	0	0	0	0.0227147	0	0.522658	0.025813	0.0430547	0	0.111517	0	0.0489055	0	0.00600188	0	0.702374	0.722755
TCGA.AQ.A0Y5.01	EPHA7-WT	0.00311803	0.00620906	0	0	0	0.0892067	0.0034001	0.0203996	0.0322472	0	0.0499404	0.0007	0	0.332247	0.00630037	0.348689	0	0	0.101369	0	0	0.0061596	0	0.676226	0.753149
TCGA.FF.A7CX.01	EPHA7-WT	0.0813723	0.47028	0.0663971	0.114035	0	0	0.0071586	0.0651798	0.00682464	0	0.00159952	0.0170642	0	0.0941692	0.0155948	0.0603252	0	0	0	0	0	0	0	0.652162	0.758052
TCGA.LL.A6FQ.01	EPHA7-WT	0	0.0156474	0.0566133	0.0321459	0	0.0012647	0	0.0775566	0.00800972	0	0	0.0335242	0.0729149	0.282256	0.0285414	0.367592	0	0	0.0223142	0.00161987	0	0	0	0.644796	0.776352
TCGA.EI.6509.01	EPHA7-WT	0	0.0138645	0.00122401	0.0155243	0.0739478	0	0	0.00432358	0.0135247	0	0.048832	0	0	0.594913	0.0047029	0.179107	0	0	0	0.0500364	0	0	0	0.744745	0.674344
TCGA.XF.A9T2.01	EPHA7-WT	0.00479409	0.00165355	0.00427558	0.0293186	0	0	0	0.0606364	0.0541265	0.0146247	0	0.0816866	0	0.340034	0	0.189744	0.0076492	0	0.211456	0	0	0	0	0.648161	0.778166
TCGA.BA.5557.01	EPHA7-WT	0.00359028	0	0	0.0218702	0	0.0247833	0	0.0160083	0.00814233	0	0.00718539	0	0.0003	0.565571	0.00270463	0.0880248	0	0.0182756	0	0.189991	0	0.0535649	0	0.755431	0.661133
TCGA.85.8664.01	EPHA7-WT	0.0969671	0	0.0308776	0.0821024	0	0	0	0.117718	0.0387332	0.0118387	0.0434221	0	0	0.415969	0.0274522	0.115727	0	0	0	0.0191926	0	0	0	0.686539	0.749504
TCGA.CQ.5326.01	EPHA7-WT	0	0.0003	0	0.00396181	0	0.0547539	0	0.0117938	0.00440888	0	0.0323091	0	0	0.344599	0.0146736	0.16441	0	0.0150768	0	0.330284	0	0.0234131	0.001	0.61941	0.784632
TCGA.FS.A1ZD.06	EPHA7-WT	0	0.0146338	0.0073091	0.0987994	0	0.0342236	0	0.0514851	0.0206046	0	0	0.135465	0.0165682	0.342475	0	0.214557	0.00146321	0	0.0624162	0	0	0	0.001	0.616931	0.794946
TCGA.FP.A9TM.01	EPHA7-WT	0.384194	0.227265	0.0686916	0.0225618	0	0.128981	0	0.0581259	0.0004	0	0	0.0101997	0	0.00886261	0.011478	0.0590124	0	0.0041904	0.0160666	0	0	0	0.001	0.614529	0.792135
TCGA.RQ.A6JB.01	EPHA7-WT	0.0281542	0.539598	0	0.0858247	0	0	0.0225705	0.0447165	0.01997	0	0	0.0081211	0	0.0594217	0.054077	0.125386	0	0	0.0121609	0	0	0	0.001	0.621012	0.78442
TCGA.FD.A5BX.01	EPHA7-WT	0.00453508	0.00168717	0	0.0406033	0	0.0277594	0.0115844	0	0	0.0414646	0	0	0.0554029	0.218741	0.0258842	0.516037	0.0303883	0	0	0.025871	0	0	0.001	0.616034	0.789821
TCGA.FA.A6HN.01	EPHA7-WT	0.0640212	0.439067	0.0154506	0.112267	0	0	0.0228326	0.108882	0.0458153	0	0	0	0	0.0260334	0.0424385	0.12082	0	0	0.00237234	0	0	0	0.001	0.620959	0.78593
TCGA.CN.5364.01	EPHA7-MUT	0	0	0	0.0267699	0	0.0417236	0	0.0889128	0.0176644	0	0	0.0300458	0	0.260402	0.0828224	0.360106	0.0616318	0	0.0299206	0	0	0	0.002	0.610012	0.798483
TCGA.CD.8531.01	EPHA7-WT	0	0.423845	0.107376	0.0542778	0	0	0	0.113054	0.00766677	0	0	0.0240834	0	0.0249754	0	0.152788	0.00270207	0.0698674	0.0185984	0	0	0.0008	0.002	0.608058	0.795232
[truncated: 2,964 more rows]
