# Supplementary material for: EPHA7 mutation as a predictive biomarker for immune checkpoint inhibitors in multiple cancers
Source: BMC Med. 2021 Feb 2;19:26. doi: 10.1186/s12916-020-01899-x (PMC7852135; doi:10.1186/s12916-020-01899-x)
Supplement: Supplementary file 6 — Additional file 6: Table S4. Significant pathways detected by gene set enrichment analysis. (EPHA7-MUT vs EPHA7-WT tumors). [file 12916_2020_1899_MOESM6_ESM.xlsx]

## Sheet: HALLMARK
ID	Description	setSize	enrichmentScore	NES	pvalue	FDR	rank	leading_edge	core_enrichment(ENTREZID)
HALLMARK_XENOBIOTIC_METABOLISM	HALLMARK_XENOBIOTIC_METABOLISM	190	-0.707889	-1.61327	6.26e-10	1.25e-08	760	tags=19%, list=4%, signal=18%	5967/218/8876/2099/1586/6999/1066/6370/1543/7274/126/3290/131/8529/6580/116842/3700/366/1036/2646/2328/2168/316/26998/3083/27329/1571/2159/3484/383/3697/6898/51733/5950/866/7448
HALLMARK_ANDROGEN_RESPONSE	HALLMARK_ANDROGEN_RESPONSE	100	0.575845	2.16363	8.51e-10	1.25e-08	932	tags=20%, list=5%, signal=19%	3817/354/220/4824/7113/10257/6611/10611/10645/25803/8611/9590/55839/79689/6652/56937/51171/3977/2289/11057
HALLMARK_COAGULATION	HALLMARK_COAGULATION	126	-0.727243	-1.64213	1.32e-08	1.3e-07	1519	tags=32%, list=8%, signal=29%	7057/629/8309/3172/5196/4316/1191/4320/1311/1510/3158/11202/718/7044/5055/3075/4485/283/4319/341/2161/8858/4224/5265/3818/2266/9104/5624/10747/733/2159/164656/344/7018/1361/2243/462/3697/2147/335
HALLMARK_DNA_REPAIR	HALLMARK_DNA_REPAIR	149	0.450112	1.85245	3.41e-07	2.51e-06	4972	tags=48%, list=27%, signal=36%	5435/6386/100/5148/2237/353/7298/29927/5888/8721/2068/4833/5434/9013/3615/3978/124583/5424/1687/6809/4350/64976/6895/57804/3059/25874/2067/6884/6924/5142/9328/11130/4830/6834/1716/6621/2962/79720/6829/53343/25920/7936/7508/8237/8731/10063/11047/6878/6749/4832/2959/5430/1643/27343/1642/1603/4882/1854/29901/9978/7084/9883/10189/9533/10946/10978/5980/30833/3704/5429/5983/23649
HALLMARK_KRAS_SIGNALING_DN	HALLMARK_KRAS_SIGNALING_DN	178	-0.661039	-1.50241	1.63e-06	9.63e-06	2583	tags=40%, list=14%, signal=35%	7042/6414/10964/7781/6261/3351/2261/8900/7832/10913/51384/3291/5158/778/4908/1907/4868/7038/29930/658/1014/9499/10753/50489/57016/55277/6620/4842/57451/1630/1146/6528/10777/7032/11202/3866/797/80303/1271/3860/4625/5055/7051/1158/786/23676/5650/242/105375355/3848/70/3963/3851/7356/5409/7367/3785/51806/6707/1280/10686/2813/727/525/55220/8647/51156/7021/3699/10991/1360
HALLMARK_MYC_TARGETS_V1	HALLMARK_MYC_TARGETS_V1	200	0.384597	1.52537	2.66e-06	1.31e-05	6080	tags=46%, list=33%, signal=31%	1017/6723/8318/4953/3015/4174/9136/7298/3615/5425/10291/790/10907/6150/3735/10574/26354/26121/1503/6632/8662/4830/5714/5902/991/4176/6626/8664/28973/10856/2547/4171/8761/5685/3837/5245/5691/51690/6146/23016/3475/1854/708/5690/3326/7332/10399/10155/51020/7284/3939/6193/51491/5496/6164/23450/6141/3376/4175/10528/4673/9377/5709/2091/2739/5250/2806/6633/6950/7965/1965/55651/5901/5984/56910/9221/5713/…
HALLMARK_E2F_TARGETS	HALLMARK_E2F_TARGETS	200	0.373898	1.48294	1.03e-05	4.32e-05	6368	tags=56%, list=35%, signal=37%	5558/79019/3015/4174/9232/9212/27338/29893/11004/84316/993/55143/203068/3835/4605/11113/7283/5425/146909/3978/5424/3159/3925/6241/10460/6941/1503/4292/9787/4830/10615/5902/54962/701/55635/991/4176/4172/10212/81624/6117/23594/4678/672/2547/4171/5347/9238/204/3014/7083/6790/6749/10535/5889/9133/3070/1854/10248/1111/84296/64858/29980/4288/5426/10606/9700/147841/1062/332/4175/23165/10528/5983/4673/55…
HALLMARK_BILE_ACID_METABOLISM	HALLMARK_BILE_ACID_METABOLISM	107	-0.693891	-1.56342	1.94e-05	7.15e-05	1221	tags=21%, list=7%, signal=19%	27284/11001/10350/8856/8424/23460/24/8630/8435/10998/8431/366/64577/9971/51268/1733/1582/64241/189/7276/335/866
HALLMARK_MYC_TARGETS_V2	HALLMARK_MYC_TARGETS_V2	58	0.54251	2.07484	7.6e-05	0.000249043	5377	tags=59%, list=29%, signal=42%	6652/6723/4174/9136/23481/6573/56342/9064/23223/51154/705/2193/10514/83743/6949/1844/79050/26354/54663/92856/5347/9238/5245/56915/79711/27340/51491/23082/4839/10528/27346/51388/3099/7965
HALLMARK_G2M_CHECKPOINT	HALLMARK_G2M_CHECKPOINT	199	0.346445	1.37352	8.68e-05	0.000255854	4728	tags=37%, list=26%, signal=28%	5558/8140/85236/8318/4953/4502/3015/10036/4174/990/9232/9212/27338/55872/11004/1869/6541/3619/993/8438/1841/3835/1870/4605/5001/3159/3925/10293/10460/8317/5371/9493/3312/6632/3980/10721/991/4172/10212/6491/699/7290/23594/4678/4171/10403/57082/3837/1058/5347/51659/5119/387893/9055/9156/10762/3014/6790/25/1871/1950/9133/2130/262/1111/10024/10419/4288/5426/9700/1062/332/3832
HALLMARK_MTORC1_SIGNALING	HALLMARK_MTORC1_SIGNALING	199	0.320997	1.27262	0.000778131	0.00208494	4255	tags=36%, list=23%, signal=28%	51109/7453/6509/10622/8140/6652/11151/26471/6515/9136/2023/47/31/993/3145/7283/2181/2286/3417/7436/23753/26227/23645/9695/2936/10652/6241/6309/516/5199/2232/5606/10061/116496/2821/7108/9521/57761/6472/10212/30001/5719/6117/80777/699/6503/10963/10437/4171/3992/5685/51382/5236/29968/3689/5347/900/2597/811/1649/6790/3309/7184/4836/4793/7167/5693/3475/441024/10197/5641/10452
HALLMARK_INTERFERON_GAMMA_RESPONSE	HALLMARK_INTERFERON_GAMMA_RESPONSE	200	0.324298	1.28622	0.000946081	0.00232371	2123	tags=22%, list=12%, signal=19%	3662/55024/952/3620/7453/8869/3669/115361/7378/4283/3001/3123/3383/116071/57823/6352/5698/9688/6890/4502/10068/6398/3108/3117/6375/4261/3394/5321/5214/5699/26524/22914/3105/3106/6373/3659/5770/5721/3937/3430/84166/6772/3560
HALLMARK_MYOGENESIS	HALLMARK_MYOGENESIS	187	-0.589062	-1.34186	0.00190561	0.00432041	3346	tags=36%, list=18%, signal=30%	7164/23604/4621/26353/6678/2247/2702/1277/5569/7138/43/5837/5507/26287/1293/1281/8038/4151/6261/9172/8082/2273/1134/187/10468/3908/2027/2049/8557/3270/10290/3757/29970/7134/7139/2878/948/1191/4842/7135/58529/5348/1146/4684/1160/65055/88/7136/844/845/29895/4634/4625/6445/1837/7125/8736/1158/786/6588/70/7140/58/4619/5816/8614/4608
HALLMARK_ANGIOGENESIS	HALLMARK_ANGIOGENESIS	34	-0.742884	-1.56786	0.00298995	0.005659	2544	tags=38%, list=14%, signal=33%	1281/1462/894/6372/4060/1290/10631/4023/5196/5104/4487/350/7448
HALLMARK_PEROXISOME	HALLMARK_PEROXISOME	103	-0.624692	-1.40839	0.00301995	0.005659	579	tags=16%, list=3%, signal=15%	2172/5243/3291/11001/8856/1382/5244/6833/7356/7367/1056/1381/1733/213/7276/866
HALLMARK_COMPLEMENT	HALLMARK_COMPLEMENT	196	-0.581536	-1.32569	0.00307536	0.005659	1918	tags=15%, list=10%, signal=13%	629/3172/23414/51440/6280/948/1191/88/4057/718/5055/3075/6283/2625/4322/283/2153/341/29106/5265/3818/725/2159/164656/4504/462/3697/2155/2147
HALLMARK_ESTROGEN_RESPONSE_LATE	HALLMARK_ESTROGEN_RESPONSE_LATE	198	-0.57755	-1.31542	0.00326403	0.005659	4563	tags=46%, list=25%, signal=35%	56994/64215/11012/7980/10105/27134/26509/51195/1952/10140/58495/5364/928/56603/64065/3918/9135/2707/7022/8645/23650/10874/2444/5603/760/7162/7164/9231/2013/596/799/3880/2852/26353/27075/27250/3398/5655/6337/21/445/6478/2810/11098/9368/9536/8839/55540/3487/2261/11031/6387/3572/51083/8900/4232/64699/9022/374/8309/57419/11001/1345/1154/4602/8416/7134/6280/9254/3158/4057/771/12/9547/56521/5979/3860/5…
HALLMARK_OXIDATIVE_PHOSPHORYLATION	HALLMARK_OXIDATIVE_PHOSPHORYLATION	200	0.305953	1.21346	0.0042714	0.00699411	5702	tags=46%, list=31%, signal=32%	5435/527/3945/92609/581/9296/1727/374291/23203/50/4835/8402/3417/291/533/529/26517/9550/516/1892/54884/2821/7388/4329/513/7384/6834/498/4728/64963/3030/537/56993/10939/593/1327/211/4191/3032/1351/51382/4722/26519/4702/10063/506/4190/4713/89941/27429/4714/9927/1355/2395/3028/4723/64960/10312/1743/4717/4729/30/3939/2109/10975/65003/6183/29796/54704/3420/6390/4700/3419/4708/9377/528/4695/23530/1632/…
HALLMARK_ALLOGRAFT_REJECTION	HALLMARK_ALLOGRAFT_REJECTION	193	0.298571	1.17756	0.00773342	0.0119964	2202	tags=28%, list=12%, signal=25%	3662/3603/7453/3458/9437/3824/924/3932/3002/5551/27240/925/4283/356/56253/3001/915/3383/6351/8807/6352/7535/3594/919/916/2149/822/6890/11184/1445/926/3108/3117/917/7454/2634/914/3394/6891/3111/5699/3133/4050/3105/2113/5579/3702/3937/3109/6772/3560/2833/3559/3122
HALLMARK_PANCREAS_BETA_CELLS	HALLMARK_PANCREAS_BETA_CELLS	32	-0.690977	-1.45191	0.0163221	0.0240536	2842	tags=50%, list=15%, signal=42%	3170/6927/5063/4005/3651/2645/4821/57586/1641/1113/3642/6833/10590/5122/6750/5313
HALLMARK_ESTROGEN_RESPONSE_EARLY	HALLMARK_ESTROGEN_RESPONSE_EARLY	198	-0.537577	-1.22437	0.038	0.0527557	4448	tags=44%, list=24%, signal=34%	10105/23030/27134/26509/51195/1952/10140/22996/7739/58495/107/5366/3898/56603/18/8553/56944/7022/8645/54898/2444/2683/26018/23389/3480/5420/55793/7162/7164/5914/596/799/3880/79754/26353/64798/6505/5655/6337/5029/21/55638/1999/4582/6478/2810/11098/9368/9536/367/8839/55540/3487/375449/9620/11031/6387/3572/64699/2697/9022/374/57419/11001/1154/91683/4602/54463/8416/25800/347733/6542/794/65055/3866/77…
HALLMARK_MITOTIC_SPINDLE	HALLMARK_MITOTIC_SPINDLE	198	0.269296	1.05688	0.0393784	0.0527557	4728	tags=34%, list=26%, signal=25%	10611/3797/4628/4650/4296/29/2934/4983/11004/5829/396/54509/51199/3619/22994/3835/50628/25777/5311/6711/10300/116840/9493/9826/55704/23192/4643/9787/121512/393/10801/4739/64411/54443/80119/9564/699/1778/10403/10928/832/2316/5347/10844/9055/7430/1794/89941/6790/9344/25/79658/85378/114791/9133/29901/2017/6904/8440/11133/9700/1062/140735/3996/332/85464/3832
HALLMARK_INTERFERON_ALPHA_RESPONSE	HALLMARK_INTERFERON_ALPHA_RESPONSE	97	0.309492	1.21838	0.0453125	0.0708809	1949	tags=15%, list=11%, signal=14%	2766/7453/3669/115361/116071/1267/5698/6890/2634/6373/3659/55281/3107/5721/3430

## Sheet: KEGG
ID	Description	setSize	enrichmentScore	NES	pvalue	FDR	rank	leading_edge	core_enrichment(ENTREZID)
hsa00830	Retinol metabolism	52	-0.870794	-1.87434	1e-10	6.16e-09	679	tags=52%, list=4%, signal=50%	6121/1577/8630/1555/7367/54575/7364/79799/1543/126/131/54658/130/125/316/8608/1576/54577/127/1579/1551/10720/7366/1559/1558/1548/7363
hsa00980	Metabolism of xenobiotics by cytochrome P450	57	-0.867197	-1.88851	1e-10	6.16e-09	870	tags=51%, list=5%, signal=49%	1645/1564/1572/218/1577/1555/7367/54575/7364/79799/1543/126/3290/131/54658/2939/130/125/1576/54577/127/2938/1565/1571/10720/7366/1559/1548/7363
hsa00982	Drug metabolism - cytochrome P450	53	-0.866498	-1.86688	1e-10	6.16e-09	837	tags=55%, list=5%, signal=52%	2330/1564/218/1577/1555/7367/54575/7364/79799/126/131/54658/2939/130/125/2328/316/1576/54577/127/2938/1565/1571/10720/7366/1559/1558/1548/7363
hsa04610	Complement and coagulation cascades	72	-0.841265	-1.85122	1e-10	6.16e-09	791	tags=38%, list=4%, signal=36%	718/5055/3075/5104/2153/727/2161/5265/3818/722/2266/725/10878/5624/10747/733/2159/2244/5345/1361/2243/462/729/3053/2155/2147/7448
hsa05204	Chemical carcinogenesis	60	-0.842971	-1.84295	1.73e-10	8.5e-09	711	tags=45%, list=4%, signal=43%	218/1577/7367/54575/7364/79799/1543/126/3290/9/131/54658/2939/130/125/1576/54577/127/2938/1571/1551/10720/7366/1559/1558/1548/7363
hsa00983	Drug metabolism - other enzymes	66	-0.823606	-1.8042	1.13e-09	4.63e-08	439	tags=30%, list=2%, signal=30%	10/151531/7367/54575/1066/7364/79799/9/54658/2939/1576/54577/2938/1571/10720/7366/1807/1548/7363/51733
hsa04976	Bile secretion	69	-0.802798	-1.76315	1.16e-08	4.1e-07	1696	tags=49%, list=9%, signal=45%	358/2052/6550/478/1080/6343/123264/200931/486/6344/5244/10998/477/8431/7367/54575/7364/79799/480/54658/6580/366/482/64240/361/1576/570/54577/8647/9971/10720/7366/64241/7363
hsa04979	Cholesterol metabolism	46	-0.849697	-1.81889	1.88e-08	5.8e-07	619	tags=33%, list=3%, signal=32%	6770/4036/8435/3990/341/64240/4018/8647/27329/55908/344/64241/338/335/350
hsa00140	Steroid hormone biosynthesis	44	-0.845502	-1.79959	1.06e-07	2.91e-06	1793	tags=59%, list=10%, signal=53%	3291/1646/1583/1588/3294/1589/1645/6783/1577/8630/1586/7367/54575/7364/79799/1543/3290/54658/1576/54577/1571/1551/10720/7366/1109/7363
hsa04080	Neuroactive ligand-receptor interaction	237	-0.655325	-1.49891	1.61e-07	3.96e-06	3349	tags=56%, list=18%, signal=46%	1511/152/151/799/255061/2696/2916/5732/135/84634/165829/22953/51738/4923/5029/6753/8973/1909/6866/2563/116443/6865/1906/2859/2564/55879/146/552/1131/2690/2798/2846/1903/148/3355/3351/1812/2847/2743/6751/1134/5745/3356/187/5729/51083/5731/2831/2151/2904/3363/1815/8811/1395/2894/1136/116444/2917/1907/150/6869/2561/6755/64106/8862/7253/9340/59350/3814/134/1268/7434/1146/10888/1394/2905/6343/339403/2…
hsa04612	Antigen processing and presentation	62	0.603318	2.33113	4.15e-07	8.24e-06	2796	tags=55%, list=15%, signal=47%	3805/3458/3824/1514/925/3123/3821/3310/6890/3303/1508/926/3108/3117/4261/6891/3111/3115/3133/3127/3105/3119/3106/3118/3107/3134/3113/5721/3109/3122/3304/3312/8625/972
hsa00053	Ascorbate and aldarate metabolism	18	-0.926454	-1.82305	4.2e-07	8.24e-06	439	tags=56%, list=2%, signal=54%	7367/54575/7364/79799/54658/9104/54577/10720/7366/7363
hsa00860	Porphyrin and chlorophyll metabolism	32	-0.858726	-1.77512	4.35e-07	8.24e-06	439	tags=28%, list=2%, signal=28%	7367/54575/7364/79799/54658/54577/10720/7366/7363
hsa04650	Natural killer cell mediated cytotoxicity	100	0.495936	1.95291	1.74e-06	3.06e-05	2564	tags=39%, list=14%, signal=34%	399694/5293/3458/9437/5530/4772/3824/10870/3932/3002/5551/51744/356/3383/4068/7535/919/5880/3821/962/259197/2207/25759/3133/100507436/22914/3105/3106/3107/5579/5881/5605/3937/5533/3265/5335/8795/5291/27040
hsa04658	Th1 and Th2 cell differentiation	84	0.520467	2.06355	5.65e-06	9.28e-05	2313	tags=42%, list=13%, signal=37%	3595/864/3458/6300/5530/4772/3932/3123/915/5600/7535/3594/919/4794/30009/916/6776/3108/3117/917/3111/3115/3127/3119/3118/3113/5533/3109/55534/6772/3560/3718/3559/3122/5335
hsa04975	Fat digestion and absorption	34	-0.823134	-1.71271	2.14e-05	0.000328788	625	tags=41%, list=3%, signal=40%	5320/948/346606/5319/64600/1056/64240/2168/29881/4547/84647/64241/338/335
hsa04724	Glutamatergic synapse	106	-0.69327	-1.54567	2.66e-05	0.00038584	2212	tags=30%, list=12%, signal=27%	775/81539/5332/2904/773/116444/2917/2752/57030/50944/2785/2905/27165/2901/2897/123745/6511/283748/2903/6512/6507/2914/2918/2900/2899/2892/2893/6506/3760/2890/2891/10991
hsa04659	Th17 cell differentiation	98	0.464946	1.89816	3.1e-05	0.000423984	2373	tags=38%, list=13%, signal=33%	3662/3458/6300/5530/4772/3932/3123/915/5600/7535/3594/919/4794/30009/916/6776/3108/3117/917/6258/3111/3115/3127/3119/3118/3113/2475/5533/3109/6772/3560/3718/3559/3556/3122/5335/50615
hsa04142	Lysosome	126	0.41102	1.71894	4.05e-05	0.000525411	3681	tags=46%, list=20%, signal=37%	58511/8905/54/9374/1521/50617/1514/245972/967/1200/1522/4864/57192/535/3073/26088/23659/527/1497/6609/1508/410/6272/2629/4669/26503/8943/51172/3482/8722/4125/79158/5476/2760/1509/8907/9114/5660/6448/427/533/968/162/1174/411/4668/130340/1513/537/8218/950/7805/53/3074/2588/20/2799/9583
hsa05235	PD-L1 expression and PD-1 checkpoint pathway in cancer	87	0.456127	1.84285	5.06e-05	0.000623256	2811	tags=32%, list=15%, signal=27%	5293/3458/10000/6300/5530/4772/3932/5133/915/5600/116071/7535/919/4794/916/917/4215/5605/2475/5533/3265/6772/5335/29126/5291/27040/5606/5604
hsa04974	Protein digestion and absorption	79	-0.710588	-1.56616	5.52e-05	0.000647462	3130	tags=51%, list=17%, signal=42%	1289/6505/1277/85301/81578/1287/1293/1302/1281/1305/6564/1288/7373/1278/3784/1290/6543/1308/1299/2006/6550/1301/6519/478/59272/1300/6547/1297/11136/486/477/5644/480/1280/5645/7512/4224/482/1361/1360
hsa00040	Pentose and glucuronate interconversions	24	-0.838771	-1.68908	7.7e-05	0.000861765	439	tags=42%, list=2%, signal=41%	57016/7367/54575/7364/79799/54658/54577/10720/7366/7363
hsa04918	Thyroid hormone synthesis	67	-0.716212	-1.57068	9.47e-05	0.000987883	2083	tags=28%, list=11%, signal=25%	5332/389434/50506/7038/2878/7253/478/6528/486/405753/4036/477/480/482/84699/432/213/433/7276
hsa05332	Graft-versus-host disease	32	0.63541	2.04571	9.63e-05	0.000987883	2202	tags=69%, list=12%, signal=61%	3458/3824/3002/5551/356/3123/3821/3108/3117/3111/3115/3133/3127/3105/3119/3106/3118/3107/3134/3113/3109/3122
hsa00130	Ubiquinone and other terpenoid-quinone biosynthesis	11	-0.920426	-1.70147	0.000128641	0.00126745	132	tags=27%, list=1%, signal=27%	1728/3242/6898
hsa05203	Viral carcinogenesis	184	0.342469	1.53994	0.000142807	0.00127394	2045	tags=23%, list=11%, signal=20%	8339/1017/8347/5293/8367/8365/8343/90993/440689/8379/8970/8349/85236/121504/245972/8341/7185/8294/85477/8850/8370/8360/6776/27044/2934/3017/581/55697/5315/5829/3133/3105/3249/3106/148327/8344/3107/64764/9114/3134/3265/9519
hsa03050	Proteasome	44	0.564849	1.89688	0.000143345	0.00127394	5790	tags=64%, list=31%, signal=44%	3458/5698/5699/5695/5721/5694/5714/5715/5719/5685/5702/11047/5708/5691/5692/5696/5705/5693/10197/5690/5720/5709/51371/5717/5686/9861/5713/7979
hsa05330	Allograft rejection	32	0.62626	2.01625	0.000144815	0.00127394	2202	tags=62%, list=12%, signal=55%	3458/3002/5551/356/3123/3108/3117/3111/3115/3133/3127/3105/3119/3106/3118/3107/3134/3113/3109/3122
hsa00591	Linoleic acid metabolism	25	-0.82043	-1.66439	0.00028311	0.00240463	1605	tags=44%, list=9%, signal=40%	5320/246/123745/283748/5319/64600/1576/1571/84647/1559/1558
hsa03030	DNA replication	35	0.609427	2.02412	0.000460968	0.00378479	5500	tags=60%, list=30%, signal=42%	5558/4174/2237/5425/3978/5424/84153/57804/4176/4172/246243/6117/4171/10535/5426/4175/5983/23649/56655/6118/5984
hsa03320	PPAR signaling pathway	68	-0.707927	-1.55101	0.000546459	0.00434199	2042	tags=29%, list=11%, signal=26%	28965/8309/11001/364/4023/23205/948/729359/3158/79966/23305/10998/2173/5346/5105/2168/1579/9370/1582/335
hsa04972	Pancreatic secretion	80	-0.684218	-1.50683	0.000690447	0.00531463	1605	tags=25%, list=9%, signal=23%	5320/478/1080/6343/22802/486/6344/5319/64600/477/5644/480/1056/491/5645/482/1811/84647/1361/1360
hsa00590	Arachidonic acid metabolism	56	-0.70611	-1.53689	0.000954183	0.00693642	1908	tags=36%, list=10%, signal=32%	5743/4051/5742/5320/27306/2878/246/123745/283748/242/5319/64600/1555/11283/8529/1571/84647/1579/1559/1558
hsa04024	cAMP signaling pathway	193	-0.592911	-1.3529	0.000957464	0.00693642	2366	tags=33%, list=13%, signal=29%	2737/2696/5732/135/51738/6662/776/1909/116443/1259/1906/5295/56670/3355/3351/1812/815/6751/775/2904/778/1258/4878/116444/1907/27198/10451/6755/7253/55811/478/134/7434/5348/1080/2905/10021/4881/2740/116/1813/5733/2903/5021/486/9568/1262/6752/1908/7432/477/480/51806/2892/2893/491/1261/6750/482/2890/84699/117/2891/4886
hsa00010	Glycolysis / Gluconeogenesis	58	-0.692341	-1.50996	0.00108146	0.00761091	2156	tags=22%, list=12%, signal=20%	8789/2027/387712/2645/218/126/131/5105/130/125/127/5313/229
hsa00520	Amino sugar and nucleotide sugar metabolism	47	0.51499	1.78224	0.00116224	0.00795218	1932	tags=30%, list=11%, signal=27%	5973/51005/91373/54187/2762/5372/3073/29925/3101/1118/29926/1727/4351/10020
hsa04260	Cardiac muscle contraction	76	-0.67495	-1.4859	0.00141748	0.00943641	1902	tags=32%, list=10%, signal=28%	775/778/59283/1345/3270/6543/55799/7134/7139/9254/478/27092/845/6547/10345/4634/4625/486/786/70/477/59285/480/482
hsa04660	T cell receptor signaling pathway	99	0.38402	1.4953	0.00149424	0.00968566	2564	tags=30%, list=14%, signal=26%	5293/3458/10000/6300/5530/4772/3932/5133/1493/925/915/5600/7535/919/4794/916/9402/926/917/10892/3702/5605/3937/5533/3265/29851/84433/5335/5291/27040
hsa03010	Ribosome	129	0.357579	1.37368	0.00153807	0.00971414	6004	tags=46%, list=33%, signal=31%	6192/51116/55052/51065/6150/6182/124995/6154/6122/6124/64963/6203/200916/6209/7311/63875/10573/23521/6135/25873/6166/6206/6168/6146/6152/11224/64960/6130/64969/55168/2197/6223/6137/6193/65003/6183/6164/6158/6159/6141/6234/6181/6176/54948/6218/6139/6228/64965/6205/51264/64981/6161/3921/6204/9349/51069/6155/6125/29074
hsa00970	Aminoacyl-tRNA biosynthesis	44	0.497634	1.67116	0.00169769	0.0104542	4845	tags=48%, list=26%, signal=35%	7453/7407/57505/57176/2193/5188/3735/16/3035/5859/23395/8565/123283/123263/833/4141/6301/2617/10667/3376/79587
hsa00350	Tyrosine metabolism	33	-0.754744	-1.56842	0.0021368	0.0128372	711	tags=39%, list=4%, signal=38%	1644/1621/218/7054/5409/126/131/130/125/316/3242/127/6898
hsa05169	Epstein-Barr virus infection	184	0.31472	1.41516	0.00220211	0.0129146	4171	tags=35%, list=23%, signal=28%	1017/5293/864/10000/6300/7431/3123/915/3383/5600/919/4794/916/6890/3108/3117/917/10912/581/6891/3111/3115/1869/3133/695/3127/3105/3119/3106/3118/3107/1870/3134/3113/960/3109/6772/3718/3122/5291/4791/5606/6773/5714/896/10454/5719/8717/29760/842/5702/11047/7186/5708/811/567/207/2923/1871/5705/4793/958/1643/1021/7297
hsa05320	Autoimmune thyroid disease	32	0.546144	1.75832	0.00264616	0.015158	2202	tags=62%, list=12%, signal=55%	3002/5551/1493/356/3123/3108/3117/3111/3115/3133/3127/3105/3119/3106/3118/3107/3134/3113/3109/3122
hsa03460	Fanconi anemia pathway	51	0.462694	1.68172	0.00273919	0.0153342	5331	tags=53%, list=29%, signal=38%	353497/5888/201254/2175/2177/2067/641/4292/146956/6117/672/100526739/7156/2187/91442/8940/5889/9894/84464/55215/2189/378708/80198/5980/5429/6118/80233
hsa04742	Taste transduction	51	-0.69531	-1.49233	0.0028276	0.0154774	3666	tags=55%, list=20%, signal=44%	8645/342372/196883/50832/22953/6337/6326/1131/954/3355/83756/3351/6340/775/5332/5153/773/6338/5137/40/10021/2555/2558/29850/9568/2914/6328/3359
hsa00270	Cysteine and methionine metabolism	47	-0.707294	-1.51733	0.00366585	0.0196295	516	tags=13%, list=3%, signal=12%	10993/635/1036/23743/4143/6898
hsa04964	Proximal tubule bicarbonate reclamation	22	-0.776992	-1.55763	0.00461619	0.0239351	1696	tags=50%, list=9%, signal=45%	358/6550/478/27165/762/486/477/480/5105/482/10991
hsa01230	Biosynthesis of amino acids	68	-0.663517	-1.45371	0.00466428	0.0239351	847	tags=13%, list=5%, signal=13%	2875/10993/1373/5313/4143/5009/5053/383/229
hsa04726	Serotonergic synapse	97	-0.62045	-1.37858	0.00476897	0.0239729	2364	tags=34%, list=13%, signal=30%	3709/776/4129/3762/3355/3351/3356/775/5743/5332/3363/778/773/5742/1644/2561/246/1562/2785/6570/260293/1564/123745/7166/3751/283748/242/6532/3359/3760/1565/1559/1558
hsa00071	Fatty acid degradation	42	-0.704928	-1.48883	0.00620588	0.0305721	1492	tags=19%, list=8%, signal=18%	23205/23305/126/131/130/125/127/1579
hsa05033	Nicotine addiction	29	-0.736699	-1.51041	0.00636792	0.0307553	2857	tags=69%, list=16%, signal=58%	8973/2563/116443/2564/55879/2904/773/116444/57030/2561/2905/2555/2558/2903/1141/2568/2892/2893/2890/2891
hsa04261	Adrenergic signaling in cardiomyocytes	137	-0.581487	-1.31609	0.0071722	0.0339736	2381	tags=23%, list=13%, signal=20%	148/815/775/3784/6331/5332/778/59283/6543/55799/7134/7139/9254/478/27092/5521/185/6547/4634/4625/486/786/70/477/59285/5502/480/51806/491/482/183/84699
hsa05150	Staphylococcus aureus infection	65	-0.659049	-1.44631	0.0086965	0.0404167	2013	tags=32%, list=11%, signal=29%	721/720/629/3872/1672/3858/3881/3868/3866/718/125115/3861/3857/3882/3860/3075/25984/1828/727/2266/10747
hsa00790	Folate biosynthesis	24	-0.753785	-1.51794	0.00903706	0.0412217	1686	tags=29%, list=9%, signal=27%	249/57016/7166/7054/250/251/5053
hsa05416	Viral myocarditis	56	0.436935	1.62545	0.00987194	0.0442112	2202	tags=43%, list=12%, signal=38%	284217/6444/5551/3123/3383/27/5880/3108/3117/6442/3111/3115/3133/3127/3105/3119/3106/3118/3107/5881/3134/3113/3109/3122
hsa04940	Type I diabetes mellitus	38	0.483112	1.62636	0.010422	0.0444428	2211	tags=58%, list=12%, signal=51%	3458/5799/3002/5551/356/3123/3108/3117/3111/3115/3133/3127/3105/3119/3106/3118/3107/3134/3113/3109/3122/1363
hsa04270	Vascular smooth muscle contraction	125	-0.588844	-1.32496	0.0104416	0.0444428	3140	tags=29%, list=17%, signal=24%	135/2977/10266/10335/3709/776/1909/5592/1906/146/552/94274/340156/148/91807/775/5332/778/4878/1907/5320/4880/85366/4881/185/797/123745/283748/5319/64600/1908/51806/796/183/84647/1579
hsa00770	Pantothenate and CoA biosynthesis	20	-0.772702	-1.53187	0.0106424	0.0444428	1290	tags=25%, list=7%, signal=23%	55350/5169/8876/1807/51733
hsa00380	Tryptophan metabolism	39	-0.690602	-1.45489	0.0106454	0.0444428	1856	tags=26%, list=10%, signal=23%	169355/1644/26/23498/7166/6999/1543/316/130013/64577
hsa04971	Gastric acid secretion	69	-0.641234	-1.40831	0.0113131	0.0464432	2503	tags=35%, list=14%, signal=30%	3709/3772/1131/340156/389015/91807/815/3784/5332/54207/478/3776/85366/1080/115111/3766/887/6752/477/3773/480/51806/6750/482
hsa04662	B cell receptor signaling pathway	78	0.376892	1.51462	0.0120595	0.0486958	2824	tags=32%, list=15%, signal=27%	5293/10000/5530/4772/971/4794/353514/5880/11006/695/11025/10892/79168/974/5579/5881/5605/5533/3265/84433/10288/5291/10990/5604/2213
hsa05031	Amphetamine addiction	66	-0.640591	-1.40329	0.0145573	0.0577322	2972	tags=32%, list=16%, signal=27%	6531/776/4129/116443/1812/815/775/2904/116444/1644/2905/6570/2903/23237/7054/51806/2892/2893/2890/84699/2891
hsa05340	Primary immunodeficiency	33	0.480102	1.57438	0.0147661	0.0577322	2170	tags=39%, list=12%, signal=35%	3932/925/915/7535/100/916/6890/926/4261/6891/695/3718/29851
hsa00120	Primary bile acid biosynthesis	15	-0.808021	-1.54764	0.0159908	0.0615437	464	tags=47%, list=3%, signal=46%	10858/9023/8309/10998/570/1582/1109
hsa00220	Arginine biosynthesis	21	-0.74857	-1.49428	0.0171038	0.0637869	1733	tags=38%, list=9%, signal=35%	2752/4843/4842/27165/2875/1373/5009/383
hsa00340	Histidine metabolism	21	-0.750296	-1.49773	0.0171038	0.0637869	2928	tags=52%, list=16%, signal=44%	3176/4129/222/3067/57571/26/218/84735/3034/144193/10841
hsa04380	Osteoclast differentiation	123	0.314801	1.29218	0.0173506	0.0637869	2824	tags=26%, list=15%, signal=22%	4286/5293/3690/3458/10000/6300/140885/54/5530/4772/3932/55423/5600/8061/353514/653361/11006/695/11025/79168/3937/5533/6772/10288/5291/9846/4791/10990/814/6773/5604/2213
hsa05020	Prion diseases	36	-0.68244	-1.42778	0.0181237	0.0656492	1219	tags=17%, list=7%, signal=16%	4684/4685/3552/727/733/729
hsa04961	Endocrine and other factor-regulated calcium reabsorption	48	-0.63769	-1.36838	0.0208986	0.0741252	2231	tags=27%, list=12%, signal=24%	5745/9365/5332/6543/478/6547/486/2099/477/793/480/491/482
hsa04713	Circadian entrainment	91	-0.599833	-1.32647	0.021148	0.0741252	2695	tags=24%, list=15%, signal=21%	5592/3762/9722/6261/815/775/5332/2904/55811/4842/6263/2785/2905/116/2903/51806/2892/2893/3760/2890/117/2891
hsa05145	Toxoplasmosis	109	0.324047	1.31325	0.0213664	0.0741252	2766	tags=25%, list=15%, signal=21%	79444/284217/3458/10000/6300/3123/5600/3310/3303/3108/3117/4261/3111/3115/3127/3119/3118/3113/330/3109/6772/3122/2770/3304/5606/3312/3913
hsa00360	Phenylalanine metabolism	15	-0.776931	-1.48809	0.0250597	0.0857304	711	tags=47%, list=4%, signal=45%	4129/222/1644/218/3242/5053/6898
hsa04721	Synaptic vesicle cycle	69	-0.622237	-1.36659	0.0254582	0.0859009	2116	tags=38%, list=12%, signal=33%	26052/6571/6505/6531/6536/10815/112755/773/57030/6539/6534/6857/6570/23025/6540/6530/534/6511/6512/6507/6616/10814/6532/525/6529/6506
hsa04136	Autophagy - other	31	0.496806	1.6011	0.0275252	0.0916203	5992	tags=68%, list=33%, signal=46%	55062/11337/60673/2475/23130/57521/23192/64223/84971/23710/79065/26100/9776/84938/10533/5289/30849/9474/64422/8678/11345
hsa00410	beta-Alanine metabolism	28	-0.699781	-1.43365	0.0284464	0.0923728	711	tags=21%, list=4%, signal=21%	57571/2571/218/84735/1807/51733
hsa05322	Systemic lupus erythematosus	93	0.331057	1.3852	0.0285014	0.0923728	2321	tags=46%, list=13%, signal=41%	8339/3012/8347/55766/8367/8365/3458/8343/8351/440689/8970/8349/85236/121504/3123/8341/8294/3013/8370/8360/3015/92815/8336/3108/3117/8357/712/3017/8334/3111/3115/3127/3119/8344/3118/713/8353/3113/3109/3122/714/8969/128312
hsa04924	Renin secretion	64	-0.613928	-1.34839	0.0306122	0.0979257	3152	tags=38%, list=17%, signal=31%	5732/2977/3709/776/1909/1906/775/5332/5153/778/4878/1907/358/5137/134/4881/116/185/22802/5972/1908/51806/183/117
hsa03410	Base excision repair	33	0.432432	1.41806	0.0354891	0.112071	5811	tags=48%, list=32%, signal=33%	2237/252969/5425/3978/5424/4350/57804/10039/3980/27343/4968/5426/56655/4595/27301/23583
hsa04728	Dopaminergic synapse	127	-0.559659	-1.2601	0.0410822	0.128091	2972	tags=23%, list=16%, signal=19%	6531/3709/776/4129/3762/1812/815/775/5332/2904/1815/773/1644/2785/5521/6570/1813/2903/50632/6323/7054/3798/51806/2892/2893/3760/2890/84699/2891
hsa02010	ABC transporters	44	-0.624561	-1.32934	0.0431125	0.132741	3446	tags=45%, list=19%, signal=37%	10057/9429/64137/21/26154/154664/5243/10349/10350/1672/1080/23460/368/24/5244/6833/85320/64240/8647/64241
hsa00260	Glycine, serine and threonine metabolism	35	-0.657917	-1.36831	0.0461373	0.140301	516	tags=23%, list=3%, signal=22%	2731/132158/10993/29958/2628/635/51268/189
hsa00592	alpha-Linolenic acid metabolism	23	-0.697911	-1.40245	0.048369	0.145293	1605	tags=26%, list=9%, signal=24%	5320/123745/283748/5319/64600/84647

## Sheet: GO
ID	Description	setSize	enrichmentScore	NES	pvalue	FDR	rank	leading_edge	core_enrichment(ENTREZID)
GO:0008202	steroid metabolic process	290	-0.694578	-1.59838	1e-10	5.7e-08	2278	tags=28%, list=12%, signal=25%	441282/2264/348/6817/1592/10170/54361/57678/51083/3291/1591/27284/8309/5156/6799/11001/1646/1583/1588/3294/8856/3158/1080/1589/185/3953/5087/1645/319/6783/1577/2246/2099/3952/6770/8630/4036/145264/340895/1586/1555/5618/8435/10998/8431/7367/1066/7364/1543/1056/3990/10202/3290/9965/341/54658/8608/1576/570/29881/8647/27329/183/1565/1571/9971/1551/10720/7366/4504/5444/1559/1558/1582/1548/1109/174/338…
GO:0009410	response to xenobiotic stimulus	257	-0.706251	-1.62416	1e-10	5.7e-08	2402	tags=33%, list=13%, signal=29%	1393/6261/3351/1812/2944/6817/5999/1592/3356/57412/2326/5153/1815/2327/27284/2056/6799/3172/3208/5742/1956/358/200315/387758/2052/8856/1268/1621/6263/1562/27092/1394/5446/10/2660/26/845/1645/1813/1564/4025/2903/1572/218/5021/1577/1141/5179/6770/6863/5244/7054/6283/7356/1555/6999/54575/1066/1543/9/3359/54658/54905/5105/1036/1373/2939/2328/13/1576/570/1800/54577/6529/2938/1565/1571/1551/10720/7366/…
GO:0010466	negative regulation of peptidase activity	212	-0.712027	-1.64063	1e-10	5.7e-08	1525	tags=29%, list=8%, signal=27%	144568/27344/221476/327657/6423/8710/7429/6317/8740/149708/144203/1470/4057/199713/718/12/1469/89766/5266/6318/11005/124857/89778/5055/5275/1475/5858/7079/10406/5104/145264/128488/27290/5076/646424/2719/286204/727/3700/1472/5265/2168/4018/256394/26998/1800/5267/183/1473/51156/5345/4504/7021/3699/3698/462/3697/3053/197/259/866/7448
GO:0010817	regulation of hormone levels	475	-0.653035	-1.50827	1e-10	5.7e-08	2405	tags=30%, list=13%, signal=26%	3624/1393/441282/94121/4803/5947/6817/1592/10170/54361/5046/775/51083/3291/2661/83875/2697/27284/389434/3651/773/4878/5156/222546/3172/10699/1646/1735/1583/1588/4602/2752/150/30812/1956/50506/6755/8528/3745/7038/3741/8862/375704/9254/27344/57016/3294/1215/4843/3814/387597/134/1268/5653/1562/6528/2645/1080/1394/2304/6343/5446/2740/116/389692/2822/5798/1589/131177/59272/1382/185/6447/1645/1813/2922…
GO:0010951	negative regulation of endopeptidase activity	205	-0.71142	-1.63853	1e-10	5.7e-08	1525	tags=35%, list=8%, signal=33%	9806/140686/4803/2621/7035/5743/440068/721/7057/6590/720/5274/358/144568/27344/327657/6423/8710/7429/6317/8740/149708/144203/1470/4057/199713/718/12/1469/5266/6318/11005/124857/89778/5055/5275/1475/5858/7079/10406/5104/145264/128488/27290/5076/646424/286204/727/3700/1472/5265/2168/4018/256394/26998/1800/5267/183/1473/51156/5345/4504/7021/3699/3698/462/3697/3053/197/259/866/7448
GO:0015850	organic hydroxy compound transport	213	-0.716029	-1.64977	1e-10	5.7e-08	2354	tags=34%, list=13%, signal=30%	3351/1812/348/3356/6387/51083/90019/1815/23208/359/345274/91683/1588/4602/364/150/358/3745/948/115584/201780/1191/4842/6857/1268/1080/1394/123264/6570/225689/185/6530/200931/57586/6623/1645/64805/1813/5021/5972/143425/1141/3952/6770/1113/6863/5244/53919/160728/7432/8435/10998/1066/6532/1056/3990/341/6580/366/64240/29881/8647/183/55937/9971/344/9370/5444/1109/64241/338/335/5950
GO:0042445	hormone metabolic process	208	-0.714982	-1.64791	1e-10	5.7e-08	2494	tags=39%, list=14%, signal=34%	2690/653/5125/441282/4803/5947/6817/1592/10170/54361/5046/51083/3291/83875/27284/389434/5156/10699/1646/1735/1583/1588/50506/8528/7038/27344/57016/3294/1215/5653/1562/6528/2304/5446/1589/59272/1382/6447/1645/6783/5972/6121/1577/405753/2099/3952/6770/8630/64377/2625/1586/1066/7364/1543/5122/126/10202/3290/131/54658/8614/130/125/8608/1576/54577/64577/127/1565/1381/1551/1733/10720/1559/1558/1109/174…
GO:0045861	negative regulation of proteolysis	300	-0.674025	-1.5521	1e-10	5.7e-08	1525	tags=21%, list=8%, signal=20%	144568/27344/221476/327657/6423/8710/7429/6317/8740/149708/144203/1470/4057/199713/718/12/1469/89766/5266/6318/11005/124857/89778/5055/5275/1475/5858/7079/10406/5104/145264/128488/27290/5076/646424/2719/286204/727/3700/1472/5265/2168/4018/256394/26998/1800/5267/183/1473/51156/5345/4504/1361/7021/3699/3698/462/3697/3053/197/2147/259/866/7448
GO:0071466	cellular response to xenobiotic stimulus	157	-0.736834	-1.68564	1e-10	5.7e-08	2513	tags=38%, list=14%, signal=33%	8824/2690/1393/6261/2944/6817/1592/57412/2326/2327/27284/6799/3172/5742/1956/358/200315/2052/8856/6263/1562/5446/10/2660/26/845/1645/1564/4025/1572/218/1577/6770/6283/1555/54575/1066/1543/9/54658/54905/5105/1036/2939/2328/13/1576/570/1800/54577/2938/1565/1571/1551/10720/7366/1559/383/1558/1548
GO:0006720	isoprenoid metabolic process	117	-0.766929	-1.74174	1.93e-10	9.9e-08	2372	tags=42%, list=13%, signal=37%	441282/2239/5947/348/1592/10170/5264/83875/2262/1956/4023/57016/1562/3158/5919/1382/1645/24/6121/1577/6770/4036/7054/5948/1543/2719/126/131/54658/130/125/8608/1576/54577/64577/127/55937/1565/1381/1571/1551/344/1559/1558/1109/338/7276/335/5950
GO:0006805	xenobiotic metabolic process	108	-0.764989	-1.73586	2.72e-10	1.27e-07	2293	tags=44%, list=12%, signal=39%	2944/6817/1592/57412/2326/2327/27284/6799/3172/5742/2052/8856/1562/5446/10/26/1645/1564/4025/1572/218/1577/6770/6283/1555/54575/1066/1543/9/54658/54905/1036/2939/2328/13/1576/570/1800/54577/2938/1565/1571/1551/10720/7366/1559/1558/1548
GO:0006721	terpenoid metabolic process	99	-0.778017	-1.76035	6.67e-10	2.86e-07	1307	tags=47%, list=7%, signal=44%	441282/2239/5947/348/1592/10170/83875/2262/1956/4023/57016/1562/3158/5919/1382/1645/24/6121/1577/6770/4036/5948/1543/2719/126/131/54658/130/125/8608/1576/54577/64577/127/55937/1565/1381/1571/1551/344/1559/1558/1109/338/7276/335/5950
GO:0051346	negative regulation of hydrolase activity	393	-0.637602	-1.47012	7.31e-10	2.89e-07	1707	tags=24%, list=9%, signal=22%	3434/9806/140686/4803/2621/120892/80034/7035/5743/440068/721/23504/7057/6590/720/5274/358/151242/7139/144568/90853/27344/221476/327657/6423/57718/8710/4842/7429/58529/6317/8740/149708/144203/5806/116154/116/5764/1470/4057/199713/718/12/1469/3953/89766/5266/6318/11005/124857/89778/5055/5275/1475/5858/7079/10406/5104/145264/128488/27290/5076/646424/5502/2719/286204/727/341/3700/1472/5265/2168/4018/…
GO:0006959	humoral immune response	182	-0.704497	-1.61743	9.4e-10	3.45e-07	1929	tags=32%, list=10%, signal=29%	6590/720/629/2302/3853/5320/6280/1672/57115/5196/51435/1191/55061/114771/78989/5919/6279/27202/4057/718/6278/5266/11005/10584/84659/1755/5967/3075/6441/2220/92747/5650/1113/3848/5319/6283/2625/566/26525/80341/727/55600/5645/116842/25818/5225/722/725/10747/733/2244/1361/2243/729/3263/114770/2147/1370/7448
GO:0031424	keratinization	88	-0.791326	-1.78406	1.07e-09	3.66e-07	2014	tags=56%, list=11%, signal=50%	85285/9333/3872/2312/3853/3889/3892/3858/7062/387273/7053/3881/3868/3846/3866/5266/286887/125115/43849/11005/26085/3861/3857/3882/3860/3854/3713/25984/6700/1475/7051/3848/84518/3851/23581/6698/6703/9119/43847/6704/6705/6699/1823/6707/1828/196374/1041/25818/3887
GO:0070268	cornification	76	-0.802011	-1.803	2.08e-09	6.55e-07	2011	tags=58%, list=11%, signal=52%	9333/3872/2312/3853/3889/3892/3858/7062/3881/3868/3866/5266/286887/125115/43849/11005/26085/3861/3857/3882/3860/3854/3713/25984/6700/1475/7051/3848/3851/23581/6698/6703/9119/43847/6704/6705/6699/1823/6707/1828/196374/1041/25818/3887
GO:0033059	cellular pigmentation	50	0.709034	2.49156	2.17e-09	6.55e-07	1877	tags=40%, list=10%, signal=36%	4935/6490/7306/1130/4644/5873/23682/89781/967/9839/585/10981/3257/84062/64284/8943/26276/4647/8907/79083
GO:0052548	regulation of endopeptidase activity	367	-0.630863	-1.4533	4.06e-09	1.16e-06	2343	tags=23%, list=13%, signal=20%	9806/140686/4803/2621/341676/7035/5743/2904/440068/721/7057/6590/720/89780/5274/358/6280/144568/10017/27344/327657/6423/8710/7429/6657/6317/8740/149708/144203/84630/1470/6279/4057/199713/718/12/1469/5266/6318/11005/4838/124857/89778/5055/5275/2903/4137/1475/5858/7079/10406/5104/145264/128488/27290/5076/646424/286204/727/3700/1472/5265/2168/4018/256394/26998/1800/5267/183/1473/51156/5345/4504/7021…
GO:0016101	diterpenoid metabolic process	90	-0.77557	-1.74816	5.42e-09	1.44e-06	2372	tags=49%, list=13%, signal=43%	441282/2239/5947/348/1592/10170/83875/2262/1956/4023/57016/1562/5919/1382/1645/24/6121/1577/6770/4036/5948/1543/2719/126/131/54658/130/125/8608/1576/54577/64577/127/55937/1565/1381/1551/344/1558/1109/338/7276/335/5950
GO:0010876	lipid localization	363	-0.63021	-1.45148	5.61e-09	1.44e-06	2313	tags=23%, list=13%, signal=20%	5243/338440/348/80763/23120/51083/4232/28965/1815/10349/2661/7057/345274/11001/10350/1588/4602/1149/114786/4023/5320/286256/948/201780/4843/1191/1080/1394/123264/185/23460/200931/718/222008/1645/1813/24/319/5972/388323/3952/56923/6770/5104/6863/5319/5244/64600/53919/160728/8435/10998/1066/1056/7274/653509/3990/341/8529/366/7069/3929/64240/2168/4018/29881/8647/27329/183/55937/4547/9971/84647/1579/…
GO:0002526	acute inflammatory response	91	-0.76797	-1.7331	6.2e-09	1.52e-06	1366	tags=33%, list=7%, signal=31%	134/1268/116/6279/3552/6288/718/12/57817/6289/5733/8876/6863/2625/54658/2161/3700/3929/5265/3818/5005/84699/5345/5004/7036/6291/462/3240/197/2147
GO:0009636	response to toxic substance	481	-0.608243	-1.40473	1.05e-08	2.45e-06	2354	tags=21%, list=13%, signal=19%	3351/1812/2944/348/5999/1134/120892/2263/4489/80310/5743/5153/2904/1815/57578/7732/374/389434/116372/3651/1136/1440/3208/5742/1644/57165/4602/358/6327/50506/2052/3741/6280/4747/4880/2878/3043/948/57016/3039/1268/1621/1146/8989/1394/5446/116/6279/79849/2660/761/57817/1813/2984/4025/2903/1572/137902/5021/1141/5179/3952/6770/70/7054/2625/3747/5076/477/3746/4916/1066/4487/51208/1543/6532/7274/10202/3…
GO:0006639	acylglycerol metabolic process	104	-0.743771	-1.68141	1.26e-08	2.72e-06	1142	tags=21%, list=6%, signal=20%	2822/718/1607/346606/145264/392636/283/10998/2173/3990/341/5105/7069/1373/13/2168/9104/1571/344/338/335/350
GO:0034754	cellular hormone metabolic process	114	-0.74487	-1.68996	1.27e-08	2.72e-06	2291	tags=41%, list=12%, signal=36%	441282/5947/6817/1592/10170/54361/83875/5156/1646/1583/1588/57016/3294/1562/1589/1382/1645/6783/6121/1577/2099/6770/8630/1586/7364/1543/126/10202/131/54658/130/125/8608/1576/54577/64577/127/1565/1381/1551/10720/1559/1558/1109/174/7276/5950
GO:0006869	lipid transport	329	-0.638222	-1.46985	1.51e-08	3.1e-06	2405	tags=24%, list=13%, signal=21%	3624/2172/5243/338440/348/80763/23120/51083/28965/1815/10349/2661/7057/345274/11001/10350/1588/4602/114786/5320/286256/948/201780/4843/1191/1080/1394/123264/185/23460/200931/1645/1813/24/319/5972/388323/3952/56923/6770/5104/6863/5319/5244/64600/53919/160728/8435/10998/1066/1056/7274/653509/3990/341/8529/366/7069/3929/64240/2168/4018/29881/8647/183/55937/4547/9971/84647/1579/344/9370/5444/1109/642…
GO:0015918	sterol transport	88	-0.771737	-1.7399	2.19e-08	4.32e-06	1478	tags=24%, list=8%, signal=22%	948/1191/1080/1645/3952/6770/5244/8435/1066/1056/3990/341/64240/29881/55937/344/9370/5444/64241/338/335
GO:0001523	retinoid metabolic process	85	-0.778734	-1.75055	2.37e-08	4.51e-06	1307	tags=49%, list=7%, signal=46%	441282/2239/5947/348/1592/10170/83875/2262/4023/57016/1562/5919/1382/1645/24/6121/1577/4036/5948/1543/2719/126/131/54658/130/125/8608/1576/54577/64577/127/55937/1565/1381/1551/344/1558/1109/338/7276/335/5950
GO:0052547	regulation of peptidase activity	391	-0.620836	-1.4317	2.61e-08	4.78e-06	2343	tags=22%, list=13%, signal=20%	9806/140686/4803/2621/341676/7035/5743/2904/440068/721/7057/6590/720/89780/5274/358/6280/144568/10017/27344/221476/327657/6423/8710/7429/6657/6317/8740/149708/144203/84630/1470/6279/4057/199713/718/12/1469/89766/5266/6318/11005/4838/124857/89778/5055/5275/2903/4137/1475/5858/7079/10406/5104/145264/128488/27290/5076/646424/2719/286204/727/3700/1472/5265/2168/4018/256394/26998/1800/5267/183/1473/51…
GO:0045471	response to ethanol	116	-0.733449	-1.66528	2.77e-08	4.9e-06	2972	tags=39%, list=16%, signal=33%	6531/3709/7412/4129/116443/1365/1393/3351/5999/2263/2904/1815/57578/1440/4880/1268/1621/1394/116/6279/2660/761/57817/1813/2903/1141/5179/3952/6770/70/7054/2625/3747/4916/51208/3359/131/54658/1036/130/1571/117/9370/7200/5950
GO:0030301	cholesterol transport	75	-0.789379	-1.77513	3.65e-08	6.24e-06	1478	tags=28%, list=8%, signal=26%	948/1191/1080/1645/3952/6770/5244/8435/1066/1056/3990/341/64240/29881/55937/344/9370/5444/64241/338/335
GO:0044550	secondary metabolite biosynthetic process	25	0.815307	2.471	4.03e-08	6.68e-06	1190	tags=44%, list=6%, signal=41%	51151/6490/7306/1638/4435/4157/4644/4948/102724560/9839/1497
GO:0042737	drug catabolic process	119	-0.727709	-1.65564	5.03e-08	8.07e-06	1943	tags=33%, list=11%, signal=29%	27284/6799/2731/50506/2878/3043/8856/3039/4842/1621/27233/1562/1580/5016/1564/4025/10247/1572/137902/6783/1577/10993/1555/131/54905/5105/1576/3242/1565/1571/51268/5053/4504/1559/1807/1558/1548/3240/6898
GO:0043588	skin development	275	-0.642061	-1.47758	5.88e-08	9.14e-06	4014	tags=46%, list=22%, signal=37%	1830/5318/56603/64065/57216/3911/10628/3852/1832/2707/55612/239/677/55506/5080/3691/2252/7421/147409/7124/596/1364/3880/1515/6469/23022/1289/1825/9079/8644/5017/1277/387264/8643/6662/80326/204219/26154/3204/54474/3664/94234/6939/861/2810/7042/1281/168002/3624/6261/59344/9620/2263/5046/1278/51083/8456/10468/10913/51384/85285/9333/1290/3872/2312/11166/1956/3488/3853/147495/3889/3892/3858/8549/7062/…
GO:0042438	melanin biosynthetic process	19	0.860388	2.42332	6.2e-08	9.23e-06	1190	tags=53%, list=6%, signal=49%	51151/6490/7306/1638/4435/4157/4644/4948/9839/1497
GO:0046148	pigment biosynthetic process	53	0.657512	2.32297	6.29e-08	9.23e-06	2145	tags=38%, list=12%, signal=33%	51151/4935/6490/7306/1638/4435/4157/4644/4948/9839/2235/100/1497/353/25902/706/7389/3145/402055/1371
GO:0006641	triglyceride metabolic process	84	-0.766463	-1.72178	7.22e-08	1.03e-05	1142	tags=24%, list=6%, signal=22%	2822/718/346606/145264/392636/10998/2173/3990/341/5105/7069/1373/13/2168/9104/1571/344/338/335/350
GO:0016999	antibiotic metabolic process	105	-0.733045	-1.65814	7.47e-08	1.04e-05	1943	tags=32%, list=11%, signal=29%	27284/6799/1646/255027/1956/50506/2878/3043/57016/3039/27233/1580/1645/4025/137902/6783/405753/6770/1543/126/3034/131/144193/54658/5105/130/125/1800/27035/127/10841/4504/3240/1109
GO:0043473	pigmentation	94	0.534225	2.05176	1.28e-07	1.73e-05	1625	tags=33%, list=9%, signal=30%	51151/4935/4286/1910/6490/7306/1638/4435/1130/4157/4644/4948/5873/23682/81285/51176/89781/11234/967/124976/9839/585/10981/3257/84062/3815/581/64284/8943/26276/4647
GO:0006638	neutral lipid metabolic process	105	-0.728422	-1.64769	1.69e-07	2.23e-05	1142	tags=21%, list=6%, signal=20%	2822/718/1607/346606/145264/392636/283/10998/2173/3990/341/5105/7069/1373/13/2168/9104/1571/344/338/335/350
GO:0002576	platelet degranulation	122	-0.716216	-1.62797	1.93e-07	2.47e-05	1549	tags=23%, list=8%, signal=21%	2162/5196/948/7273/1191/5919/88/12/7044/2153/29106/3700/5265/2266/5005/5267/3481/1/2244/5345/5004/7018/2243/213/3699/197/335/350
GO:0072376	protein activation cascade	22	-0.910452	-1.83358	2.31e-07	2.82e-05	258	tags=45%, list=1%, signal=45%	2161/3818/2266/2159/2244/2243/462/2155/2147/350
GO:0072378	blood coagulation, fibrin clot formation	22	-0.910452	-1.83358	2.31e-07	2.82e-05	258	tags=45%, list=1%, signal=45%	2161/3818/2266/2159/2244/2243/462/2155/2147/350
GO:0002920	regulation of humoral immune response	60	-0.798395	-1.77388	2.66e-07	3.18e-05	2013	tags=38%, list=11%, signal=34%	721/720/629/2302/1191/55061/27202/718/11005/3075/5650/727/25818/5225/722/725/733/1361/729/3263/2147/1370/7448
GO:0006898	receptor-mediated endocytosis	238	-0.649265	-1.49503	2.93e-07	3.34e-05	2020	tags=20%, list=11%, signal=18%	1815/57007/23208/59283/89780/3208/4908/2348/8862/3043/6424/948/50489/3039/1191/27092/78989/117156/6288/26045/718/54550/54413/1813/53353/50632/6441/146395/23237/4036/6616/6900/341/347730/284654/2890/344/7036/7018/432/213/3240/3263/338/335/259/7448
GO:0030193	regulation of blood coagulation	74	-0.768102	-1.72829	2.93e-07	3.34e-05	981	tags=23%, list=5%, signal=22%	170692/5055/3848/2161/3818/2266/5624/164656/2244/5345/1361/2243/462/2155/2147/350/7448
GO:0033344	cholesterol efflux	37	-0.84717	-1.80315	3.31e-07	3.7e-05	486	tags=27%, list=3%, signal=26%	8435/341/64240/55937/344/9370/5444/64241/338/335
GO:0032438	melanosome organization	25	0.793173	2.40391	3.54e-07	3.87e-05	1796	tags=48%, list=10%, signal=43%	4935/6490/7306/1130/23682/89781/9839/10981/3257/84062/8943/8907
GO:0006956	complement activation	56	-0.79724	-1.76569	4.25e-07	4.5e-05	1457	tags=41%, list=8%, signal=38%	721/720/629/51435/1191/55061/78989/27202/718/10584/3075/2220/3848/727/722/725/10747/733/1361/729/2147/1370/7448
GO:0050818	regulation of coagulation	77	-0.761993	-1.71542	4.3e-07	4.5e-05	981	tags=22%, list=5%, signal=21%	170692/5055/3848/2161/3818/2266/5624/164656/2244/5345/1361/2243/462/2155/2147/350/7448
GO:1901615	organic hydroxy compound metabolic process	490	-0.587061	-1.35607	4.6e-07	4.72e-05	2372	tags=24%, list=13%, signal=21%	10858/1050/5629/57540/9023/222/7042/66002/2494/80168/653/3067/441282/1812/2264/348/6817/1592/10170/54361/5745/57678/2819/9627/9464/5332/5153/1815/8811/1591/27284/389434/4051/8309/6799/11001/1646/1644/123099/1735/1583/122618/1588/9108/50506/7038/27124/57016/6620/1621/246/27233/6528/3158/1080/2304/4881/1589/3953/1645/1813/7166/2903/319/6783/6121/405753/2246/1141/3952/346606/6770/4036/3642/145264/70…
GO:0046677	response to antibiotic	306	-0.624249	-1.43813	6.41e-07	6.45e-05	3091	tags=25%, list=17%, signal=21%	6678/3373/1277/6531/3709/7412/4129/388/116443/1233/1906/1365/2706/4151/1393/3351/5999/120892/2263/80310/2904/1815/57578/7732/374/1440/4602/358/249/3741/4747/4880/3043/3039/1191/1268/1621/8989/1080/1394/116/6279/2660/26/761/57817/1813/2903/6507/1141/5179/3952/6770/70/7054/2625/7356/3747/5076/4916/51208/1543/3359/131/54658/1036/130/9283/2168/1571/117/9370/383/3240/7200/5950
GO:0015849	organic acid transport	293	-0.620215	-1.4276	6.58e-07	6.49e-05	1848	tags=24%, list=10%, signal=22%	345274/11001/2917/57030/2348/130497/6539/5320/286256/6534/6519/948/8499/201780/4843/134/6542/6857/123264/27165/115019/162515/59272/6540/200931/1645/1813/115111/6511/11136/6512/3766/2352/6507/83733/3952/56923/4915/5319/4036/5244/56301/64600/53919/160728/6616/10998/477/8529/366/7069/10050/2168/1811/55089/6529/8647/284111/6506/9058/183/9971/84647/1579/383/1109/7200/189/10991
GO:0036498	IRE1-mediated unfolded protein response	62	0.59053	2.11142	6.95e-07	6.74e-05	5085	tags=66%, list=28%, signal=48%	2134/55062/1200/581/7709/10525/56005/30827/5770/9114/4000/2135/11015/10954/55738/64061/9695/55033/9820/5611/11153/2137/6734/1639/9797/58477/84447/10897/6464/3309/10113/10130/5526/2673/578/118/9570/1663/55161/51283/2931
GO:0030216	keratinocyte differentiation	163	-0.68005	-1.55807	7.27e-07	6.91e-05	2102	tags=42%, list=11%, signal=38%	3880/1515/23022/1825/8644/387264/204219/26154/3204/54474/3664/861/2810/5046/8456/51384/85285/9333/3872/2312/3853/3889/3892/3858/7062/387273/7053/3881/3868/3846/3866/2069/6278/5266/286887/125115/43849/11005/26085/3861/3857/3882/3860/3854/5275/3713/25984/6700/1475/7051/3848/84518/3851/23581/6698/6703/9119/43847/6704/6705/6699/1823/6707/1828/196374/1041/50604/25818/3887
GO:0097305	response to alcohol	209	-0.654587	-1.50821	7.78e-07	7.26e-05	3152	tags=28%, list=17%, signal=24%	5732/55915/6678/8644/6531/3709/7412/4129/116443/1365/552/3624/1393/3351/5999/2263/5729/6586/2904/1815/57578/1440/1646/4747/4880/1268/1621/1080/1394/116/2822/6279/2660/761/57817/1813/2903/1141/5179/3952/6770/70/7054/2625/3747/4916/51208/3359/131/54658/1036/130/23209/1571/117/9370/7200/2155/5950
GO:0042730	fibrinolysis	24	-0.898562	-1.83873	8.37e-07	7.67e-05	791	tags=50%, list=4%, signal=48%	5055/3848/2161/3818/2266/164656/2244/5345/1361/2243/2147/350
GO:0007586	digestion	108	-0.712455	-1.61665	9.59e-07	8.54e-05	2503	tags=45%, list=14%, signal=39%	1131/80168/362/389015/3784/5731/6523/64081/8972/1646/150/358/388743/948/10753/4588/7429/6343/7032/6476/389383/12/1645/57817/115111/2984/5733/100507055/5021/887/4583/3952/6863/7031/8435/340204/5644/1056/340547/2255/5645/6750/64240/2168/5225/29881/64241/335/5950
GO:0006582	melanin metabolic process	20	0.831992	2.31759	9.64e-07	8.54e-05	1190	tags=50%, list=6%, signal=47%	51151/6490/7306/1638/4435/4157/4644/4948/9839/1497
GO:0016042	lipid catabolic process	298	-0.621496	-1.4306	1.1e-06	9.55e-05	2278	tags=21%, list=12%, signal=19%	348/1592/57110/5264/345557/5332/83875/1591/4051/8309/11001/122618/1588/150/285848/1149/4023/5320/54979/57016/134/1268/133121/6343/374569/5919/2822/389383/85329/123745/283748/100507055/6783/3952/8630/5319/64600/340204/57733/1066/2173/5346/219970/1056/3990/129807/341/5105/8529/1373/13/2168/1576/27329/1381/84647/1579/344/4504/9370/338/335
GO:0046942	carboxylic acid transport	291	-0.619274	-1.42576	1.41e-06	0.000120518	1848	tags=23%, list=10%, signal=21%	345274/11001/2917/57030/2348/6539/5320/286256/6534/6519/948/8499/201780/4843/134/6542/6857/123264/27165/115019/162515/59272/6540/200931/1645/1813/115111/6511/11136/6512/3766/2352/6507/83733/3952/56923/4915/5319/4036/5244/56301/64600/53919/160728/6616/10998/477/8529/366/7069/10050/2168/1811/55089/6529/8647/284111/6506/9058/183/9971/84647/1579/383/1109/7200/189/10991
GO:0032371	regulation of sterol transport	40	-0.824525	-1.76114	1.57e-06	0.000132529	628	tags=22%, list=3%, signal=22%	3952/5244/341/64240/344/9370/5444/64241/335
GO:0048066	developmental pigmentation	44	0.669633	2.23731	1.68e-06	0.000139479	1522	tags=48%, list=8%, signal=44%	51151/4935/4286/1910/7306/1638/4435/4644/4948/5873/23682/81285/51176/89781/967/124976/9839/10981/3815/581/8943
GO:0015711	organic anion transport	431	-0.59154	-1.36321	1.82e-06	0.000148607	2313	tags=23%, list=13%, signal=21%	5243/338440/348/5999/81539/80763/83546/144195/23120/353189/28965/1815/2697/7057/345274/11001/2917/358/57030/114786/2348/6539/5320/286256/6534/3043/6519/948/8499/201780/3039/4843/134/6542/6857/1080/123264/27165/762/115019/9498/162515/59272/6540/771/200931/761/1645/1813/24/115111/6511/11136/6512/3766/2352/6507/83733/388323/3952/56923/4915/57282/5319/4036/55867/5244/56301/64600/53919/160728/6616/109…
GO:0009991	response to extracellular stimulus	486	-0.579013	-1.33684	1.96e-06	0.00015743	3243	tags=23%, list=18%, signal=19%	6781/2696/4353/143686/1515/6678/8644/22953/51738/64127/1277/5029/445/7412/93649/6753/717/3170/220441/5251/54474/5629/440738/3767/167359/552/4982/7482/7481/7222/57535/2621/348/6751/1592/120892/54361/80763/2626/5743/389493/3171/3291/1591/3651/2056/359/3208/2752/1956/249/2348/10631/4023/3745/27344/4316/6423/1268/6263/6343/116/5764/389383/26/64805/92196/57817/100507055/5967/218/11170/6344/5179/3952/5…
GO:0008544	epidermis development	316	-0.61067	-1.40699	2.07e-06	0.000162349	4033	tags=43%, list=22%, signal=34%	9497/1830/5318/56603/1490/64065/57216/3911/10628/3852/3918/1832/55612/5454/3914/645027/677/55506/5080/2252/1474/7421/147409/7124/596/3714/3880/1515/2709/6469/23022/1825/9079/8644/5017/387264/8643/6662/80326/204219/1999/26154/10083/3204/54474/3664/94234/861/2810/7042/652/9368/3624/9620/2263/5046/51083/8456/10468/10913/51384/23493/85285/9333/3872/2312/11166/1308/1956/3488/3853/7399/147495/388585/38…
GO:1900046	regulation of hemostasis	75	-0.758447	-1.70557	2.09e-06	0.000162349	981	tags=23%, list=5%, signal=22%	170692/5055/3848/2161/3818/2266/5624/164656/2244/5345/1361/2243/462/2155/2147/350/7448
GO:1901606	alpha-amino acid catabolic process	100	-0.718241	-1.62517	2.21e-06	0.000169012	1883	tags=29%, list=10%, signal=26%	57571/2571/169355/2731/2752/8528/4843/4842/54511/27165/2875/23498/10247/10993/6999/3034/144193/1036/130013/64577/3242/4143/51268/5009/10841/5053/383/6898/189
GO:0006690	icosanoid metabolic process	97	-0.726745	-1.64471	2.24e-06	0.000169149	2662	tags=36%, list=14%, signal=31%	1906/66002/552/8824/9536/59344/5743/4051/5742/1646/1907/27306/246/1562/5446/1564/1572/242/126410/5319/1555/11283/1543/8529/525/1800/2938/1565/1571/1579/5444/1559/1558/1548/1109
GO:0097006	regulation of plasma lipoprotein particle levels	74	-0.749433	-1.68628	2.41e-06	0.000179601	1622	tags=24%, list=9%, signal=22%	4023/5320/948/2822/185/8435/3990/341/4018/183/55937/4547/9971/344/9370/213/338/335
GO:0003013	circulatory system process	490	-0.578381	-1.33602	2.45e-06	0.000179601	3776	tags=40%, list=21%, signal=32%	7168/785/3759/1832/947/3775/93589/57493/239/2028/10874/5443/50848/2303/5155/10268/3753/774/1003/783/1511/152/26251/2013/151/6781/255061/2852/57057/5732/135/84879/3398/22953/7010/10266/6505/2702/51738/4923/5029/3709/776/7138/177/80333/3212/1909/3816/5592/6865/3767/1906/3762/7042/66002/552/1131/5125/367/148/9722/6261/56670/3351/1812/83988/4778/91807/2621/348/5999/3356/775/80763/2626/57413/6387/1278…
GO:0052695	cellular glucuronidation	12	-0.947724	-1.75224	3.59e-06	0.000259856	439	tags=75%, list=2%, signal=73%	7367/54575/7364/79799/54658/54577/10720/7366/7363
GO:0009913	epidermal cell differentiation	211	-0.641935	-1.47875	3.74e-06	0.000266324	3264	tags=38%, list=18%, signal=32%	3714/3880/1515/23022/1825/8644/5017/387264/8643/204219/26154/10083/3204/54474/3664/861/2810/652/9368/5046/8456/51384/23493/85285/9333/3872/2312/3853/7399/388585/3889/6424/3892/3858/7062/387273/7053/3881/3868/3846/3866/2069/6278/5266/286887/125115/43849/11005/26085/3861/3857/3882/3860/3854/5275/3713/25984/6700/1475/7051/84189/3848/84518/3851/23581/6698/6703/9119/43847/6704/6705/6699/1823/6707/1828…
GO:0006953	acute-phase response	39	-0.830459	-1.77066	3.84e-06	0.000270295	1348	tags=49%, list=7%, signal=45%	1268/3552/6288/12/57817/6289/5733/54658/3700/3929/5265/5005/5345/5004/7036/6291/3240/197/2147
GO:0048753	pigment granule organization	26	0.761063	2.30291	3.98e-06	0.000276179	1796	tags=46%, list=10%, signal=42%	4935/6490/7306/1130/23682/89781/9839/10981/3257/84062/8943/8907
GO:1901605	alpha-amino acid metabolic process	195	-0.650143	-1.49542	4.08e-06	0.000278002	1913	tags=21%, list=10%, signal=19%	389434/2571/169355/2731/3172/420/2752/8528/4843/4842/54511/27165/85300/2875/23498/10247/6507/7054/10993/6999/3034/144193/635/1036/23743/1373/130013/570/1800/64577/3242/9971/4143/51268/5009/10841/5053/383/6898/189
GO:0030449	regulation of complement activation	43	-0.807092	-1.73967	4.17e-06	0.000278002	2013	tags=40%, list=11%, signal=35%	721/720/629/1191/55061/27202/718/3075/727/722/725/733/1361/729/2147/1370/7448
GO:0007584	response to nutrient	205	-0.642586	-1.47999	4.22e-06	0.000278002	3091	tags=27%, list=17%, signal=23%	6678/8644/22953/64127/1277/5029/445/7412/717/3170/5251/3767/4982/7222/2621/1592/2626/5743/1591/3651/2056/3208/1956/249/2348/10631/4023/6423/1268/6263/5764/64805/57817/218/5179/3952/6770/1543/6532/7274/54658/8614/6750/64240/5313/2642/9971/429/5009/9370/383/462/64241/2155/335
GO:0009063	cellular amino acid catabolic process	118	-0.688761	-1.56529	4.22e-06	0.000278002	1883	tags=25%, list=10%, signal=22%	57571/2571/169355/2731/2752/8528/4843/4842/54511/27165/2875/23498/10247/10993/6999/3034/144193/1036/130013/64577/3242/4143/51268/5009/10841/5053/383/6898/189
GO:0035637	multicellular organismal signaling	181	-0.653904	-1.501	4.29e-06	0.00027902	3014	tags=41%, list=16%, signal=35%	2702/51738/3709/776/80333/6326/3767/2859/3762/552/6261/1812/1134/775/6329/3784/6331/23114/58524/2697/778/4878/59283/3270/10699/6543/55799/3757/4897/6327/53828/3741/11280/4880/9254/478/4842/6263/53826/5348/53822/27092/10021/4881/59272/844/845/55800/6547/10345/29119/3751/3761/486/23630/786/4915/60598/6323/4099/6328/149461/477/54112/3736/4916/30820/23704/59285/480/491/7143/482/3760/183
GO:0034762	regulation of transmembrane transport	500	-0.572742	-1.32329	4.71e-06	0.000302413	3523	tags=34%, list=19%, signal=28%	10268/3753/140738/2631/729993/774/161253/1180/1187/783/760/3755/26251/7124/596/57657/799/2852/10089/27075/5167/2702/4923/57628/6769/338557/776/3786/2048/80333/1188/246329/6326/1909/3772/56660/3767/1906/2859/54209/5295/3762/9368/7070/1393/9722/1812/930/5243/2273/6236/338440/117532/3788/5999/259232/187/775/6329/3784/51083/6331/2904/56659/1815/3748/8811/2697/254263/7057/9022/9001/778/2056/773/4878/5…
GO:0050819	negative regulation of coagulation	50	-0.786368	-1.72359	4.8e-06	0.000304107	981	tags=30%, list=5%, signal=28%	170692/5055/3848/2161/3818/2266/5624/164656/2244/5345/1361/2243/2147/350/7448
GO:0008015	blood circulation	480	-0.579877	-1.33919	4.92e-06	0.00030815	3324	tags=36%, list=18%, signal=30%	1511/152/26251/2013/151/6781/255061/2852/57057/5732/135/3398/22953/7010/10266/6505/2702/51738/4923/5029/3709/776/7138/177/80333/3212/1909/3816/5592/6865/3767/1906/3762/7042/66002/552/1131/5125/367/148/9722/6261/56670/3351/1812/83988/4778/91807/2621/348/5999/3356/775/80763/2626/57413/6387/1278/5743/3784/6331/3363/23493/3291/8557/2697/778/2056/4878/59283/3270/10699/6543/5742/1907/55799/3757/150/195…
GO:0032374	regulation of cholesterol transport	39	-0.826457	-1.76213	6.16e-06	0.000380824	628	tags=23%, list=3%, signal=22%	3952/5244/341/64240/344/9370/5444/64241/335
GO:0055088	lipid homeostasis	120	-0.687151	-1.56311	6.53e-06	0.000398949	579	tags=21%, list=3%, signal=20%	8309/3172/285848/4023/134/53345/1645/5244/340895/8435/51085/3990/2646/64240/27329/55937/4547/9971/55908/84647/344/64241/433/338/335
GO:0030195	negative regulation of blood coagulation	48	-0.793581	-1.72921	7.01e-06	0.000423011	981	tags=31%, list=5%, signal=30%	170692/5055/3848/2161/3818/2266/5624/164656/2244/5345/1361/2243/2147/350/7448
GO:0044282	small molecule catabolic process	419	-0.587174	-1.35316	7.09e-06	0.000423011	2060	tags=17%, list=11%, signal=15%	2027/57571/1591/27284/956/4051/8309/2571/6799/169355/11001/2731/2752/9108/200315/8528/27124/10690/57016/4843/4842/1268/27233/2645/132158/54511/5446/27165/10930/151531/2875/23498/10247/6783/3795/3952/10993/10840/6999/219970/1543/1056/3034/131/144193/5105/8529/1036/2168/130013/64577/3242/127/5313/1381/4143/1579/51268/5009/10841/5053/4504/9370/5444/1807/383/6898/229/189/51733
GO:0071825	protein-lipid complex subunit organization	41	-0.807545	-1.73407	7.28e-06	0.000429372	486	tags=34%, list=3%, signal=33%	4023/5320/185/8435/3990/341/4018/183/55937/4547/344/213/338/335
GO:0009914	hormone transport	288	-0.605789	-1.39411	7.37e-06	0.000429769	3324	tags=33%, list=18%, signal=27%	152/55107/26251/7124/7447/2696/2852/8600/8938/5071/51738/3709/114899/55638/338557/776/3170/6927/57393/6865/640/3767/1906/6567/10815/3624/1393/94121/775/51083/2661/2697/3651/773/4878/222546/3172/1588/4602/2752/150/1956/6755/3745/3741/8862/375704/9254/4843/3814/387597/134/1268/2645/1080/1394/6343/2740/116/389692/2822/5798/131177/185/6447/1813/2922/5972/143425/3952/1113/6863/777/6833/1908/53919/2625…
GO:0001505	regulation of neurotransmitter levels	319	-0.602537	-1.38778	7.51e-06	0.000433034	3295	tags=35%, list=18%, signal=29%	7124/275/6571/2852/135/8938/5071/112476/6505/4923/6531/445/3176/6536/26059/776/4129/8973/43/285671/9256/116443/6865/1906/127833/10815/3067/148/9722/3351/1812/9381/5999/815/120892/3356/81539/5743/112755/9627/5153/90019/1815/23208/2571/1136/9379/2731/8448/91683/1644/8825/145270/2752/57030/3043/948/8499/4843/1191/6542/4842/6857/1268/1621/6853/22895/6854/133121/5806/10675/6570/23025/6530/2901/2555/66…
GO:0071827	plasma lipoprotein particle organization	37	-0.817877	-1.7408	7.94e-06	0.000452827	486	tags=38%, list=3%, signal=37%	4023/5320/185/8435/3990/341/4018/183/55937/4547/344/213/338/335
GO:0031099	regeneration	178	-0.646394	-1.48496	8.21e-06	0.000463097	2289	tags=24%, list=12%, signal=21%	2621/101929726/2626/6387/2027/2697/3651/1956/59352/2348/10631/158376/56963/4747/5653/6657/58529/11202/5764/3549/2660/57817/7476/5967/2322/2066/4099/8431/4916/5207/4974/7104/2255/54658/7143/570/9104/2596/1361/3484/2155/335/7448
GO:0019730	antimicrobial humoral response	81	-0.730514	-1.6437	8.63e-06	0.000481553	1633	tags=44%, list=9%, signal=41%	3853/5320/6280/1672/57115/5196/1191/114771/78989/5919/6279/4057/6278/5266/11005/84659/1755/5967/6441/92747/5650/1113/5319/6283/566/26525/80341/55600/5645/116842/25818/5225/2244/2243/114770/2147
GO:0046883	regulation of hormone secretion	238	-0.626748	-1.44319	8.91e-06	0.000491867	3324	tags=35%, list=18%, signal=29%	152/55107/26251/7124/7447/2696/2852/8600/8938/5071/51738/3709/114899/55638/776/3170/57393/6865/640/3767/1906/3624/1393/94121/775/51083/2661/2697/3651/773/4878/222546/3172/1588/4602/2752/150/1956/6755/3745/3741/8862/375704/9254/4843/3814/134/1268/2645/1080/1394/6343/2740/116/2822/131177/185/6447/1813/2922/5972/143425/3952/1113/6863/777/6833/1908/6616/3747/8431/4826/6664/2266/169026/183/9971/2244/7…
GO:0042632	cholesterol homeostasis	72	-0.739022	-1.65746	9.05e-06	0.000494297	870	tags=19%, list=5%, signal=19%	1645/340895/8435/3990/64240/27329/55937/4547/9971/84647/344/64241/338/335
GO:0050878	regulation of body fluid levels	435	-0.583764	-1.34517	9.19e-06	0.000496677	3141	tags=27%, list=17%, signal=23%	2627/135/653145/2814/57126/22953/160851/2702/1277/6337/5029/6531/3709/2048/3170/26154/54843/340205/5592/10630/1906/3020/5066/5295/2810/2191/66002/1281/171389/1131/954/362/7222/59344/4778/6340/2621/348/187/2626/7035/1278/2151/9148/3291/2697/7057/5156/359/2312/6338/89780/3172/23414/150/358/10451/80739/2162/8862/5196/3043/948/134/1311/1080/3868/6343/4881/5800/6288/80274/170692/64805/1813/140628/5055…
GO:0042738	exogenous drug catabolic process	19	-0.890869	-1.75263	9.99e-06	0.000534457	1431	tags=74%, list=8%, signal=68%	8856/4842/1562/1580/1564/1572/1555/54905/1576/1565/1571/1559/1558/1548
GO:0046394	carboxylic acid biosynthetic process	314	-0.600698	-1.3844	1.07e-05	0.000568126	1901	tags=18%, list=10%, signal=17%	8309/2571/11001/5742/1907/2752/3036/4023/27306/283985/246/10675/374569/27165/79966/1382/2875/23498/6507/242/6770/5319/340895/10993/63827/10998/51085/1543/2628/3990/9965/341/635/1036/23743/1373/1576/130013/570/9104/8647/64577/5313/1565/54988/1571/9971/5009/344/5053/9370/1559/1558/1582/1109/189/51733
GO:0070989	oxidative demethylation	17	-0.909683	-1.76491	1.23e-05	0.000644743	675	tags=35%, list=4%, signal=34%	1577/1576/1565/1551/1559/1558
GO:0016053	organic acid biosynthetic process	315	-0.599466	-1.38131	1.31e-05	0.000680347	1901	tags=18%, list=10%, signal=17%	8309/2571/11001/5742/1907/2752/3036/4023/27306/283985/246/10675/374569/27165/79966/1382/2875/23498/6507/242/6770/5319/340895/10993/63827/10998/51085/1543/2628/3990/9965/341/635/1036/23743/1373/1576/130013/570/9104/8647/64577/5313/1565/54988/1571/9971/5009/344/5053/9370/1559/1558/1582/1109/189/51733
GO:1900026	positive regulation of substrate adhesion-dependent cell spreading	37	-0.812006	-1.72831	1.4e-05	0.000716162	304	tags=16%, list=2%, signal=16%	10675/10562/2266/2244/2243/335
GO:0034765	regulation of ion transmembrane transport	427	-0.576578	-1.32864	1.41e-05	0.000716801	3014	tags=32%, list=16%, signal=27%	2702/4923/57628/6769/776/3786/2048/80333/1188/246329/6326/3772/56660/3767/2859/54209/3762/9368/7070/1393/9722/1812/930/5243/2273/6236/338440/117532/3788/5999/259232/187/775/6329/3784/51083/6331/2904/56659/1815/3748/8811/2697/254263/7057/9022/9001/778/2056/773/4878/59283/3270/3208/54207/57165/55799/23416/3757/150/283518/387129/6327/130497/50944/3745/57338/53828/3741/11280/4747/9254/5649/4842/89822…
GO:0050820	positive regulation of coagulation	25	-0.860754	-1.7657	1.45e-05	0.000723933	258	tags=32%, list=1%, signal=32%	7057/948/2161/5345/1361/2155/2147/350
GO:0031960	response to corticosteroid	145	-0.660401	-1.50655	1.45e-05	0.000723933	3295	tags=38%, list=18%, signal=31%	7124/596/799/6781/6382/1515/2852/6678/8644/1277/21/445/3176/4129/6753/1906/2706/5066/552/3351/5743/6586/3291/374/3651/2056/1956/358/249/387758/6755/4747/23205/10888/116/2660/2322/218/11170/6770/7054/6752/7356/4916/5207/54658/5105/1036/1261/1373/9370/383/6898/7200/189
GO:0006520	cellular amino acid metabolic process	334	-0.591957	-1.36314	1.59e-05	0.000786579	1913	tags=14%, list=10%, signal=13%	389434/2571/169355/2731/3172/420/1644/2752/8528/6519/4843/6542/4842/54511/374569/27165/85300/2875/23498/7166/10247/6507/7054/10993/148811/6999/3034/144193/635/1036/23743/1373/130013/570/1800/64577/3242/9971/4143/51268/5009/10841/5053/1807/383/6898/189/51733
GO:0031100	animal organ regeneration	71	-0.738438	-1.65281	1.64e-05	0.000800688	1098	tags=18%, list=6%, signal=17%	3549/57817/5967/2322/8431/5207/54658/570/9104/1361/2155/335/7448
GO:1903034	regulation of response to wounding	154	-0.652734	-1.49102	1.68e-05	0.000812714	2695	tags=27%, list=15%, signal=23%	5592/8840/10630/1906/2191/94121/348/54361/7035/2697/7057/5156/150/50506/158376/56963/64094/948/7429/58529/11202/5764/55966/170692/5055/3848/4916/2161/7143/3818/2266/5624/164656/2244/5345/1361/2243/462/2155/2147/350/7448
GO:0031667	response to nutrient levels	454	-0.573635	-1.32395	1.79e-05	0.000859243	3243	tags=23%, list=18%, signal=19%	6781/2696/4353/143686/1515/6678/8644/22953/51738/64127/1277/5029/445/7412/6753/717/3170/220441/5251/54474/5629/440738/3767/167359/4982/7482/7481/7222/57535/2621/348/6751/1592/120892/54361/80763/2626/5743/389493/3171/3291/1591/3651/2056/3208/2752/1956/249/2348/10631/4023/3745/27344/4316/6423/1268/6263/6343/116/5764/389383/26/64805/92196/57817/100507055/5967/218/11170/6344/5179/3952/56923/6770/7054…
GO:0065005	protein-lipid complex assembly	25	-0.858413	-1.7609	1.89e-05	0.000898638	486	tags=28%, list=3%, signal=27%	8435/341/55937/4547/344/338/335
GO:0034377	plasma lipoprotein particle assembly	21	-0.876212	-1.74908	1.91e-05	0.000898638	486	tags=33%, list=3%, signal=32%	8435/341/55937/4547/344/338/335
GO:0015718	monocarboxylic acid transport	145	-0.658918	-1.50317	1.93e-05	0.000901619	2042	tags=26%, list=11%, signal=23%	28965/1815/7057/345274/11001/6539/5320/286256/948/201780/4843/123264/162515/6540/200931/1645/1813/3952/56923/5319/5244/64600/53919/160728/10998/8529/366/7069/2168/6529/8647/9971/84647/1579/1109/7200/10991
GO:0048545	response to steroid hormone	354	-0.585637	-1.34834	1.96e-05	0.00090654	3399	tags=27%, list=18%, signal=23%	7421/760/5914/7124/596/1364/799/6781/6382/1515/2852/5732/6678/8644/10266/1277/21/445/3176/2103/4129/6753/1906/2706/861/5066/7042/652/2494/552/367/200845/11240/3351/55885/57678/7035/5743/6586/3291/8928/7057/374/3651/2056/10002/3172/2104/1956/358/249/387758/6755/4747/23205/8856/478/84709/10888/116/5764/158800/2660/4821/4838/7101/2322/218/11170/5021/2099/6770/7054/6752/7356/477/8431/4916/5207/58/182…
GO:0006813	potassium ion transport	205	-0.627259	-1.44469	2.04e-05	0.000937227	3014	tags=42%, list=16%, signal=35%	2702/57628/776/3786/80333/51305/3772/6559/343450/56660/3767/285335/54209/3762/9722/389015/1812/2273/3788/5999/259232/3356/3784/51083/56659/3748/8811/4878/57419/54207/23416/3757/150/358/283518/6550/3745/53828/3741/3782/478/3776/284525/134/4842/89822/3742/5348/479/2645/10021/116/88/845/9312/29850/64805/1813/3751/57582/3766/3761/486/6507/23630/60598/25769/6833/1908/7432/6616/3747/6557/477/3736/3746/…
GO:0001101	response to acid chemical	319	-0.595121	-1.3707	2.13e-05	0.000967371	3333	tags=26%, list=18%, signal=22%	5914/7124/7473/2696/143686/5159/5732/55915/6678/8644/3199/1277/84649/445/6662/11211/6935/4776/1906/2706/7483/1281/552/9536/7481/2743/1592/2263/5729/1278/80310/5743/9148/1290/2697/3651/5156/359/2731/89780/3208/1646/4602/1956/358/2348/4023/130497/158376/948/3294/7475/5764/1620/1645/5979/57817/5967/3952/4915/5244/7054/7356/5076/4916/8001/6532/5105/1036/1373/6750/6506/57795/1571/9971/429/5009/9370/54…
GO:0005996	monosaccharide metabolic process	263	-0.60808	-1.39913	2.33e-05	0.00104779	1482	tags=13%, list=8%, signal=12%	10690/55277/648791/2645/132158/2822/3953/3795/3952/145264/10993/4485/7367/54575/7364/79799/5207/54658/5105/2646/89792/9104/54577/5313/3481/2642/10720/7366/9370/4886/7021/7363/229/5950
GO:0015837	amine transport	80	-0.723164	-1.62696	2.41e-05	0.00107434	3324	tags=65%, list=18%, signal=53%	152/151/6571/135/5071/4923/83849/8973/84258/6865/127833/552/3351/1812/5999/3356/6387/90019/1815/23208/1136/2917/91683/1644/150/3745/134/6857/1268/1394/6570/59272/85413/57586/6623/64805/1813/5021/143425/1141/3952/1113/7054/7432/477/51458/366/6529/183/383/7200/10991
GO:0060047	heart contraction	245	-0.60965	-1.4035	2.5e-05	0.00110461	2664	tags=35%, list=14%, signal=30%	3767/1906/3762/7042/552/148/9722/6261/5999/775/80763/2626/57413/3784/6331/23493/8557/2697/778/4878/59283/3270/10699/6543/1907/55799/3757/7134/6327/7139/53828/3741/8862/4880/27129/9254/7273/478/85366/134/4842/6263/53826/5348/53822/27092/10021/4881/2740/59272/10265/7136/844/845/55800/6547/10345/1813/29119/4634/3751/4625/6445/121643/3761/486/23630/786/60598/1113/6863/70/6323/7054/1908/477/30820/2370…
GO:0055092	sterol homeostasis	73	-0.728555	-1.63901	2.6e-05	0.00114199	870	tags=19%, list=5%, signal=18%	1645/340895/8435/3990/64240/27329/55937/4547/9971/84647/344/64241/338/335
GO:0016054	organic acid catabolic process	263	-0.606844	-1.39629	2.67e-05	0.00114976	1908	tags=17%, list=10%, signal=15%	4051/8309/2571/169355/11001/2731/2752/8528/4843/4842/1268/54511/5446/27165/2875/23498/10247/3952/10993/10840/6999/219970/1056/3034/144193/5105/8529/1036/2168/130013/64577/3242/1381/4143/1579/51268/5009/10841/5053/9370/5444/383/6898/189
GO:0046395	carboxylic acid catabolic process	263	-0.606844	-1.39629	2.67e-05	0.00114976	1908	tags=17%, list=10%, signal=15%	4051/8309/2571/169355/11001/2731/2752/8528/4843/4842/1268/54511/5446/27165/2875/23498/10247/3952/10993/10840/6999/219970/1056/3034/144193/5105/8529/1036/2168/130013/64577/3242/1381/4143/1579/51268/5009/10841/5053/9370/5444/383/6898/189
GO:0006063	uronic acid metabolic process	17	-0.902239	-1.75047	2.74e-05	0.00115709	439	tags=53%, list=2%, signal=52%	7367/54575/7364/79799/54658/54577/10720/7366/7363
GO:0019585	glucuronate metabolic process	17	-0.902239	-1.75047	2.74e-05	0.00115709	439	tags=53%, list=2%, signal=52%	7367/54575/7364/79799/54658/54577/10720/7366/7363
GO:0043687	post-translational protein modification	339	-0.588792	-1.35612	2.75e-05	0.00115709	2667	tags=16%, list=15%, signal=14%	54587/26249/652/11098/79269/1462/201456/200845/3487/2621/348/2200/84871/146330/720/10517/3270/1154/140458/10117/3488/64344/142689/7857/10324/2822/718/92369/4148/5179/2153/1114/401138/80341/2719/29106/8614/147111/5265/2266/5624/51156/7018/3484/2243/213/3698/462/3053/174/197/338/335
GO:0007611	learning or memory	232	-0.621237	-1.43029	2.86e-05	0.00119477	2402	tags=28%, list=13%, signal=25%	1393/1812/53358/4803/348/3356/5743/57502/7832/5153/2904/8811/9379/65009/6543/4908/54207/164312/1956/57030/50944/57338/3776/5649/5803/1268/1621/4885/57144/1394/84630/2740/11202/5764/2019/1620/6547/2558/54413/1813/10882/2903/4137/577/5021/1141/23237/4915/25769/6863/7054/1524/7432/6616/477/54112/2925/793/9378/2628/6900/6532/7143/6529/2890/183
GO:1900047	negative regulation of hemostasis	49	-0.781487	-1.71143	3.12e-05	0.00129265	981	tags=33%, list=5%, signal=31%	1311/170692/5055/3848/2161/3818/2266/5624/164656/2244/5345/1361/2243/2147/350/7448
GO:0046879	hormone secretion	281	-0.599689	-1.38044	3.26e-05	0.00133861	3324	tags=33%, list=18%, signal=27%	152/55107/26251/7124/7447/2696/2852/8600/8938/5071/51738/3709/114899/55638/338557/776/3170/6927/57393/6865/640/3767/1906/10815/3624/1393/94121/775/51083/2661/2697/3651/773/4878/222546/3172/1588/4602/2752/150/1956/6755/3745/3741/8862/375704/9254/4843/3814/387597/134/1268/2645/1080/1394/6343/2740/116/389692/2822/5798/131177/185/6447/1813/2922/5972/143425/3952/1113/6863/777/6833/1908/2625/7432/6616/…
GO:0000096	sulfur amino acid metabolic process	40	-0.794655	-1.69734	3.3e-05	0.00134346	259	tags=18%, list=1%, signal=17%	635/1036/23743/1373/1800/4143/189
GO:1903522	regulation of blood circulation	258	-0.607899	-1.39772	3.54e-05	0.00143209	2664	tags=37%, list=14%, signal=32%	6505/2702/51738/3709/776/177/80333/3767/1906/3762/7042/552/1131/148/9722/6261/5999/3356/775/80763/2626/57413/5743/3784/6331/23493/2697/778/4878/59283/3270/10699/6543/1907/55799/3757/150/1956/6327/7139/53828/3741/8862/4880/27129/9254/478/134/4842/1621/6263/53826/5348/40/53822/27092/10021/4881/2740/59272/185/10265/844/845/55800/6547/10345/1813/29119/4634/3751/4625/121643/3761/5021/486/23630/786/395…
GO:0061337	cardiac conduction	131	-0.656072	-1.49242	3.6e-05	0.00143245	2212	tags=37%, list=12%, signal=32%	775/3784/6331/2697/778/4878/59283/3270/10699/6543/55799/3757/6327/53828/3741/4880/9254/478/4842/6263/53826/5348/53822/27092/10021/4881/59272/844/845/55800/6547/10345/29119/3751/3761/486/23630/786/60598/477/30820/23704/59285/480/491/482/3760/183
GO:0099177	regulation of trans-synaptic signaling	400	-0.573318	-1.32144	3.6e-05	0.00143245	3163	tags=34%, list=17%, signal=29%	2852/2916/135/8938/4900/5071/112476/51738/4923/55638/6536/776/2048/177/8973/43/4776/10858/116443/6865/4920/1906/10815/148/3351/1812/4803/348/5999/815/120892/3356/5743/152330/57502/112755/9627/5332/27253/3908/2904/1815/9148/2047/1009/1395/2894/254263/5913/9001/773/23208/1136/59283/89780/2917/6543/4908/91683/2752/1956/50944/3745/57338/575/9254/347733/8499/3814/5649/134/6857/1268/4885/6853/1630/5685…
GO:0000725	recombinational repair	130	0.40326	1.67257	3.63e-05	0.00143304	4875	tags=39%, list=27%, signal=29%	56154/8318/10459/4174/353497/2237/55137/7454/5888/375757/55135/9907/8438/197370/158880/472/51548/23503/8317/64210/5965/641/3980/10721/4176/4172/4796/6117/672/23028/4171/54386/2187/51659/9401/79000/23347/3014/5889/125150/55693/27343/84464/84515/1111/84296/51750/80198/55159/5980/4175
GO:0030194	positive regulation of blood coagulation	24	-0.861722	-1.76334	3.71e-05	0.00144247	258	tags=33%, list=1%, signal=33%	7057/948/2161/5345/1361/2155/2147/350
GO:1900048	positive regulation of hemostasis	24	-0.861722	-1.76334	3.71e-05	0.00144247	258	tags=33%, list=1%, signal=33%	7057/948/2161/5345/1361/2155/2147/350
GO:0044242	cellular lipid catabolic process	201	-0.625376	-1.43981	3.88e-05	0.00149876	1961	tags=18%, list=11%, signal=17%	2172/348/1592/5264/83875/4051/8309/11001/285848/4023/57016/1268/133121/2822/123745/283748/3952/57733/2173/219970/1056/3990/129807/341/5105/8529/1373/13/2168/27329/1381/1579/344/4504/9370/338/335
GO:0072330	monocarboxylic acid biosynthetic process	206	-0.631335	-1.45348	4e-05	0.00153101	2761	tags=29%, list=15%, signal=25%	10858/5629/9023/1906/401494/112817/552/1462/9536/1634/59344/2264/5947/10170/5743/8309/2571/11001/5742/1907/4023/27306/283985/246/10675/79966/1382/6507/242/6770/5319/340895/10993/63827/10998/51085/1543/2628/3990/9965/341/1576/130013/570/9104/8647/64577/5313/1565/54988/1571/9971/344/9370/1559/1558/1582/1109/189
GO:0000724	double-strand break repair via homologous recombination	129	0.40503	1.67311	4.39e-05	0.00167	4875	tags=40%, list=27%, signal=29%	56154/8318/10459/4174/353497/2237/55137/7454/5888/375757/55135/9907/8438/197370/158880/472/51548/23503/8317/64210/5965/641/3980/10721/4176/4172/4796/6117/672/23028/4171/54386/2187/51659/9401/79000/23347/3014/5889/125150/55693/27343/84464/84515/1111/84296/51750/80198/55159/5980/4175
GO:0061041	regulation of wound healing	127	-0.668895	-1.5201	4.56e-05	0.00170989	2695	tags=29%, list=15%, signal=25%	5592/8840/10630/1906/2191/94121/348/54361/7035/2697/7057/5156/150/50506/158376/64094/948/7429/58529/55966/170692/5055/3848/2161/3818/2266/5624/164656/2244/5345/1361/2243/462/2155/2147/350/7448
GO:1901568	fatty acid derivative metabolic process	147	-0.648024	-1.47877	4.56e-05	0.00170989	1908	tags=24%, list=10%, signal=22%	4051/5742/1646/1907/27306/79611/23205/246/1562/3158/54511/5446/79966/23305/1564/1572/242/126410/5319/1555/11283/10998/1543/8529/525/1800/2938/1565/1571/1579/5444/1559/1558/1548/1109
GO:1902652	secondary alcohol metabolic process	145	-0.6501	-1.48305	4.62e-05	0.00171859	1247	tags=15%, list=7%, signal=14%	3158/1080/3953/319/2246/3952/6770/145264/8435/8431/1066/1056/3990/341/1576/29881/27329/9971/4504/5444/338/335
GO:0050817	coagulation	294	-0.589517	-1.35714	4.68e-05	0.00172716	3324	tags=26%, list=18%, signal=22%	152/151/222537/4352/6469/2627/135/653145/2814/57126/22953/160851/1277/3709/3170/340205/5592/10630/1906/3020/5295/2191/1281/954/7222/4778/2621/348/2626/7035/1278/2151/7057/5156/89780/3172/23414/150/10451/80739/2162/5196/3043/948/1311/6288/80274/170692/64805/140628/5055/1607/5104/3848/2625/2153/2161/8858/8529/5265/3818/2266/725/5624/2159/164656/51156/2244/5345/1361/2243/462/3053/2155/2147/350/7448
GO:0061045	negative regulation of wound healing	68	-0.72566	-1.61925	4.71e-05	0.00172742	1046	tags=34%, list=6%, signal=32%	348/54361/7035/2697/7057/5156/58529/55966/170692/5055/3848/2161/3818/2266/5624/164656/2244/5345/1361/2243/2147/350/7448
GO:0003341	cilium movement	64	-0.729565	-1.62368	5.12e-05	0.00186248	2687	tags=50%, list=15%, signal=43%	55130/89876/126820/79819/220136/154313/85478/200373/54777/23639/55811/80217/55567/54768/115948/93233/64518/200162/1770/27285/387885/345895/79740/92749/150483/123872/83853/27019/83659/348807/64446/361
GO:0098657	import into cell	176	-0.631696	-1.45073	5.41e-05	0.00195708	3268	tags=41%, list=18%, signal=34%	799/26052/6571/6558/54492/5071/6505/4923/6531/6536/51305/3772/6559/3767/285335/54209/3762/389015/1812/5999/81539/80763/1815/7057/728215/59283/11001/3208/2752/3757/2348/6550/25800/948/478/284525/6542/4842/479/27092/10021/6570/225689/4057/6530/6547/1813/6511/6512/3766/50632/3761/486/6507/146395/23237/4036/6616/6557/283375/10998/477/3773/480/6532/6580/1261/482/6529/6506/3760/183
GO:0022600	digestive system process	85	-0.713922	-1.60486	5.52e-05	0.00196443	2503	tags=42%, list=14%, signal=37%	1131/80168/362/389015/3784/5731/6523/64081/150/358/948/4588/7429/6343/7032/12/1645/57817/115111/5733/5021/887/4583/3952/6863/7031/8435/1056/340547/2255/64240/2168/29881/64241/335/5950
GO:0006066	alcohol metabolic process	336	-0.587312	-1.35229	5.53e-05	0.00196443	2278	tags=18%, list=12%, signal=16%	348/6817/10170/54361/5745/57678/2819/5332/8811/27284/6799/1646/123099/1583/122618/9108/27124/57016/1621/27233/3158/1080/3953/1645/319/6783/6121/2246/3952/346606/6770/145264/8435/8431/1066/1543/1056/3990/126/131/341/5105/130/125/8608/1576/29881/27329/127/1565/9971/117/4504/5444/1109/338/7276/335/5950
GO:0007599	hemostasis	297	-0.586461	-1.35001	5.58e-05	0.00196443	3178	tags=25%, list=17%, signal=21%	6469/2627/135/653145/2814/57126/22953/160851/1277/3709/3170/340205/5592/10630/1906/3020/5295/2191/1281/954/7222/4778/2621/348/2626/7035/1278/2151/7057/5156/89780/3172/23414/150/10451/80739/2162/5196/3043/948/1311/6288/80274/170692/64805/140628/5055/1607/5104/3848/2625/2153/2161/8858/8529/5265/3818/2266/725/5624/2159/164656/51156/2244/5345/1361/2243/462/3053/2155/2147/350/7448
GO:0051917	regulation of fibrinolysis	11	-0.93379	-1.71909	5.59e-05	0.00196443	258	tags=64%, list=1%, signal=63%	7057/2161/3818/5345/1361/2147/350
GO:0007596	blood coagulation	292	-0.590373	-1.35939	5.87e-05	0.00204907	3178	tags=25%, list=17%, signal=21%	6469/2627/135/653145/2814/57126/22953/160851/1277/3709/3170/340205/5592/10630/1906/3020/5295/2191/1281/954/7222/4778/2621/348/2626/7035/1278/2151/7057/5156/89780/3172/23414/150/10451/80739/2162/5196/3043/948/1311/6288/80274/170692/64805/140628/5055/1607/5104/3848/2625/2153/2161/8858/8529/5265/3818/2266/725/5624/2159/164656/51156/2244/5345/1361/2243/462/3053/2155/2147/350/7448
GO:0042572	retinol metabolic process	37	-0.792063	-1.68586	6.01e-05	0.00208433	679	tags=32%, list=4%, signal=31%	6121/1543/126/131/130/125/8608/1576/127/1565/7276/5950
GO:0003015	heart process	254	-0.604635	-1.39015	6.21e-05	0.00213932	2664	tags=33%, list=14%, signal=29%	3767/1906/3762/7042/552/148/9722/6261/5999/775/80763/2626/57413/3784/6331/23493/8557/2697/778/4878/59283/3270/10699/6543/1907/55799/3757/7134/6327/7139/53828/3741/8862/4880/27129/9254/7273/478/85366/134/4842/6263/53826/5348/53822/27092/10021/4881/2740/59272/10265/7136/844/845/55800/6547/10345/1813/29119/4634/3751/4625/6445/121643/3761/486/23630/786/60598/1113/6863/70/6323/7054/1908/477/30820/2370…
GO:0050892	intestinal absorption	32	-0.811953	-1.70612	6.26e-05	0.0021437	2140	tags=47%, list=12%, signal=41%	3784/6523/150/948/7429/1645/57817/3952/8435/1056/64240/2168/29881/64241/335
GO:0042133	neurotransmitter metabolic process	132	-0.654027	-1.48959	6.32e-05	0.00214972	2972	tags=33%, list=16%, signal=28%	6531/445/3176/4129/43/285671/1906/3067/9722/5743/5153/2571/2731/1644/145270/3043/948/4843/1191/6542/4842/1621/133121/5806/7166/10247/2903/6507/7054/1524/10993/29958/6532/635/1373/570/9104/183/5053/1807/7200/189/51733
GO:0019373	epoxygenase P450 pathway	15	-0.894032	-1.67667	6.37e-05	0.00215236	724	tags=67%, list=4%, signal=64%	1562/1572/1555/1543/8529/1571/1579/1559/1558/1548
GO:0016125	sterol metabolic process	149	-0.647445	-1.47741	6.44e-05	0.00215985	1247	tags=15%, list=7%, signal=15%	3158/1080/1589/3953/319/2246/3952/6770/145264/8435/8431/1066/1056/3990/341/29881/27329/9971/4504/5444/1582/338/335
GO:0006334	nucleosome assembly	107	0.423002	1.60574	6.54e-05	0.00217622	3664	tags=41%, list=20%, signal=33%	8339/8347/8367/8365/3006/8343/8351/440689/8970/55839/8349/85236/121504/8341/79019/8294/8370/8360/10036/8357/3017/645996/201254/8344/8353/83743/64061/79172/128312/55355/8340/4674/80152/8208/7290/8355/4678/8363/4171/57082/1058/10541/8607/23523
GO:0008210	estrogen metabolic process	29	-0.820831	-1.71547	6.57e-05	0.00217622	709	tags=55%, list=4%, signal=53%	441282/6817/5156/1588/3294/6783/1577/6770/1543/54658/1576/1565/1551/10720/1559/1558
GO:0070988	demethylation	64	-0.72462	-1.61268	6.68e-05	0.00219828	963	tags=16%, list=5%, signal=15%	200315/10930/1577/2625/1543/1576/1565/1551/1559/1558
GO:0015721	bile acid and bile salt transport	23	-0.849165	-1.71574	6.76e-05	0.00221034	1848	tags=48%, list=10%, signal=43%	345274/201780/123264/200931/1645/53919/10998/366/8647/9971/1109
GO:0046717	acid secretion	111	-0.674768	-1.53097	6.89e-05	0.00222548	3170	tags=47%, list=17%, signal=39%	8600/22925/135/6505/51738/4923/6536/9256/1906/10815/9368/552/389015/3784/1815/2917/57030/5320/8499/4843/134/6857/6343/123264/7032/27165/200931/85413/1813/115111/5733/6511/6512/5021/887/6507/3952/56923/4915/5319/5244/64600/6616/8529/366/6529/8647/6506/84647/1579/7200/189
GO:0090277	positive regulation of peptide hormone secretion	86	-0.693944	-1.56226	6.89e-05	0.00222548	1957	tags=28%, list=11%, signal=25%	2697/3651/222546/2752/1956/8862/3814/2645/1080/6343/116/2822/1813/2922/8431/4826/2266/169026/9971/2244/7036/2243/7200/5950
GO:0050804	modulation of chemical synaptic transmission	399	-0.573613	-1.32218	7.01e-05	0.00224812	3163	tags=35%, list=17%, signal=29%	2852/2916/135/8938/4900/5071/112476/51738/4923/55638/6536/776/2048/177/8973/43/4776/10858/116443/6865/4920/1906/10815/148/3351/1812/4803/348/5999/815/120892/3356/5743/152330/57502/112755/9627/5332/27253/3908/2904/1815/9148/2047/1009/1395/2894/254263/5913/9001/773/23208/1136/59283/89780/2917/6543/4908/91683/2752/1956/50944/3745/57338/575/9254/347733/8499/3814/5649/134/6857/1268/4885/6853/1630/5685…
GO:0019886	antigen processing and presentation of exogenous peptide antigen via MHC class II	93	0.44524	1.74579	7.98e-05	0.00254369	3581	tags=43%, list=19%, signal=35%	8905/3902/1514/3123/3797/6456/1175/3108/3117/1780/3111/3115/2207/11004/8722/3127/3119/3118/1509/8907/3835/3113/3109/6396/3122/162/1174/9493/3120/972/2213/130340/81930/10121/64837/1639/1778/10437/832/7879
GO:0034368	protein-lipid complex remodeling	23	-0.846093	-1.70953	8.37e-05	0.00263679	310	tags=52%, list=2%, signal=51%	4023/5320/185/3990/341/4018/183/55937/344/213/338/335
GO:0034369	plasma lipoprotein particle remodeling	23	-0.846093	-1.70953	8.37e-05	0.00263679	310	tags=52%, list=2%, signal=51%	4023/5320/185/3990/341/4018/183/55937/344/213/338/335
GO:1903035	negative regulation of response to wounding	81	-0.706599	-1.58989	8.83e-05	0.00276389	2278	tags=32%, list=12%, signal=28%	348/54361/7035/2697/7057/5156/56963/58529/11202/55966/170692/5055/3848/2161/7143/3818/2266/5624/164656/2244/5345/1361/2243/2147/350/7448
GO:0050931	pigment cell differentiation	34	0.639475	2.01909	9.26e-05	0.00287152	871	tags=38%, list=5%, signal=36%	4286/1910/7306/4435/4644/4948/5873/23682/81285/89781/967/9839/10981
GO:0006631	fatty acid metabolic process	341	-0.579574	-1.33439	9.29e-05	0.00287152	1908	tags=16%, list=10%, signal=15%	4051/8309/11001/5742/1646/1907/4023/27306/23205/948/283985/1268/246/1562/5446/79966/718/23305/1564/283748/1572/3952/242/5319/7054/1555/11283/10998/1066/51085/219970/1543/1056/3990/131/341/5105/8529/525/2168/1576/570/9104/27329/2938/1565/54988/1571/1579/344/9370/5444/1559/1558/1548/1109
GO:0002922	positive regulation of humoral immune response	15	-0.888162	-1.66567	9.37e-05	0.00288159	1006	tags=40%, list=5%, signal=38%	718/5650/25818/5225/729/3263
GO:0019433	triglyceride catabolic process	27	-0.818225	-1.69714	9.95e-05	0.0030282	1703	tags=48%, list=9%, signal=44%	2172/348/285848/4023/2822/2173/3990/1373/13/2168/344/338/335
GO:0051384	response to glucocorticoid	130	-0.660657	-1.50181	9.97e-05	0.0030282	3295	tags=38%, list=18%, signal=32%	7124/596/799/6781/6382/1515/6678/21/445/3176/4129/6753/1906/2706/5066/552/5743/6586/3291/374/3651/2056/1956/358/249/387758/6755/4747/23205/10888/116/2660/2322/218/11170/6770/7054/6752/7356/4916/5207/54658/5105/1036/1373/9370/383/6898/7200/189
GO:0007597	blood coagulation, intrinsic pathway	13	-0.913593	-1.7045	0.000102662	0.00309539	258	tags=38%, list=1%, signal=38%	2161/3818/462/2147/350
GO:0071805	potassium ion transmembrane transport	183	-0.624147	-1.43309	0.000103105	0.00309539	2909	tags=41%, list=16%, signal=35%	57628/776/3786/80333/51305/3772/6559/343450/56660/3767/285335/54209/3762/9722/389015/2273/3788/5999/259232/3784/51083/56659/3748/8811/4878/57419/54207/23416/3757/358/283518/6550/3745/53828/3741/3782/478/3776/284525/89822/3742/479/10021/88/845/9312/29850/64805/3751/57582/3766/3761/486/6507/23630/60598/25769/6833/1908/6616/3747/6557/477/3736/3746/3785/3773/30820/23704/480/219527/482/3754/3760/1804
GO:0007612	learning	134	-0.653464	-1.48935	0.000109941	0.00328141	2149	tags=28%, list=12%, signal=25%	5743/57502/7832/5153/9379/65009/6543/164312/50944/57338/5649/1621/4885/57144/1394/5764/2019/6547/2558/54413/1813/10882/2903/577/1141/23237/4915/25769/6863/7054/6616/477/54112/9378/6900/7143/6529/183
GO:0046887	positive regulation of hormone secretion	116	-0.664037	-1.50768	0.00011108	0.00329625	3391	tags=40%, list=18%, signal=33%	4828/55107/7447/2696/2852/8600/8938/51738/114899/55638/57393/640/1906/3624/51083/2697/3651/4878/222546/1588/4602/2752/1956/8862/3814/2645/1080/6343/116/2822/1813/2922/3952/6863/1908/8431/4826/6664/2266/169026/9971/2244/7036/2243/7200/5950
GO:0006694	steroid biosynthetic process	172	-0.625003	-1.43435	0.00011222	0.00331092	2815	tags=24%, list=15%, signal=20%	9256/10858/5629/9023/653/100288072/441282/2264/348/54361/57678/3291/8309/11001/1583/1588/3294/3158/1080/1589/5087/2246/3952/6770/8630/340895/1586/5618/10998/1066/3290/9965/1576/570/29881/8647/9971/1582/1109/338/335
GO:0034367	protein-containing complex remodeling	24	-0.845652	-1.73046	0.000114734	0.00336576	310	tags=50%, list=2%, signal=49%	4023/5320/185/3990/341/4018/183/55937/344/213/338/335
GO:0033559	unsaturated fatty acid metabolic process	98	-0.686405	-1.5532	0.000115638	0.00337299	2662	tags=33%, list=14%, signal=28%	1906/66002/552/8824/9536/59344/5743/4051/5742/1646/1907/27306/246/1562/79966/1564/1572/242/1555/11283/219970/1543/8529/525/2938/1565/1571/1579/1559/1558/1548/1109
GO:0008016	regulation of heart contraction	216	-0.611693	-1.40969	0.000120217	0.00348676	2664	tags=35%, list=14%, signal=30%	3767/1906/3762/7042/552/148/9722/6261/5999/775/80763/2626/57413/3784/6331/23493/2697/778/4878/59283/3270/10699/6543/1907/55799/3757/6327/7139/53828/3741/8862/4880/27129/9254/478/134/4842/6263/53826/5348/53822/27092/10021/4881/2740/59272/10265/844/845/55800/6547/10345/1813/29119/4634/3751/4625/121643/3761/486/23630/786/60598/1113/6863/7054/1908/477/30820/23704/59285/480/491/482/3760/183
GO:0031639	plasminogen activation	22	-0.845355	-1.70248	0.000132727	0.00382796	258	tags=36%, list=1%, signal=36%	2161/3818/2266/2244/5345/1361/2243/350
GO:0098856	intestinal lipid absorption	12	-0.911828	-1.68587	0.000139164	0.00399119	1478	tags=75%, list=8%, signal=69%	948/1645/3952/8435/1056/64240/29881/64241/335
GO:0090276	regulation of peptide hormone secretion	190	-0.616446	-1.41569	0.000140825	0.0040164	3324	tags=34%, list=18%, signal=28%	152/55107/26251/7124/7447/2696/2852/8600/8938/5071/51738/3709/55638/776/3170/57393/640/3767/1393/94121/775/2697/3651/773/222546/3172/2752/150/1956/6755/3745/3741/8862/375704/9254/4843/3814/1268/2645/1080/6343/2740/116/2822/131177/1813/2922/143425/3952/1113/777/6833/6616/3747/8431/4826/2266/169026/9971/2244/7036/2243/7021/7200/5950
GO:0015672	monovalent inorganic cation transport	462	-0.558759	-1.28957	0.000145405	0.0041241	2909	tags=29%, list=16%, signal=25%	776/3786/80333/6326/51305/26266/3772/6559/343450/56606/56660/3767/285335/26249/54209/3762/9368/9722/389015/6564/1812/2273/6340/3788/5999/259232/3356/81539/6329/3784/51083/1272/6331/6523/56659/1815/3748/8811/154215/4878/57419/345274/1345/6338/6543/54207/23416/3757/150/358/283518/57030/6327/130497/6550/3745/53828/3741/11280/3782/115584/201780/478/3776/284525/134/57127/4842/89822/3742/53826/5348/40/…
GO:0002495	antigen processing and presentation of peptide antigen via MHC class II	96	0.42044	1.61049	0.000151715	0.00426921	3288	tags=40%, list=18%, signal=33%	8905/3902/1514/3123/3797/6456/1175/3108/3117/1780/3111/3115/2207/11004/8722/3127/3119/3118/1509/8907/3835/3113/3109/6396/3122/162/1174/9493/3120/972/2213/130340/81930/10121/64837/1639/1778/10437
GO:0042573	retinoic acid metabolic process	27	-0.813729	-1.68781	0.000152184	0.00426921	1307	tags=70%, list=7%, signal=65%	5947/1592/10170/83875/1562/1382/1577/1543/126/131/54658/130/125/1576/54577/64577/1381/1551/1558
GO:0034381	plasma lipoprotein particle clearance	48	-0.753861	-1.64266	0.000156775	0.00437409	486	tags=23%, list=3%, signal=22%	948/2822/8435/3990/341/55937/9971/344/9370/338/335
GO:0051952	regulation of amine transport	73	-0.707485	-1.59161	0.000164614	0.00456799	3324	tags=62%, list=18%, signal=51%	152/151/135/5071/4923/83849/8973/84258/6865/127833/552/3351/1812/5999/3356/6387/90019/1815/23208/1136/2917/91683/150/3745/134/6857/1268/1394/59272/57586/6623/64805/1813/5021/143425/1141/3952/1113/7432/477/6529/183/383/7200/10991
GO:0055090	acylglycerol homeostasis	28	-0.817611	-1.69711	0.000178488	0.00490002	375	tags=43%, list=2%, signal=42%	3172/4023/134/51085/3990/2646/27329/9971/55908/84647/344/335
GO:0070328	triglyceride homeostasis	28	-0.817611	-1.69711	0.000178488	0.00490002	375	tags=43%, list=2%, signal=42%	3172/4023/134/51085/3990/2646/27329/9971/55908/84647/344/335
GO:0090596	sensory organ morphogenesis	233	-0.59776	-1.37615	0.000179752	0.00490845	3983	tags=43%, list=22%, signal=34%	7472/56603/6094/115908/57216/124590/7849/655/6899/1750/51804/2535/5080/26018/6096/51168/50937/596/1295/2737/24147/1289/3638/3199/1749/6662/6935/2048/2637/9241/10083/23554/4237/5629/125488/4920/1906/652/7483/9368/7482/362/10818/7070/57010/9620/9423/10804/2263/579/53904/2202/4211/2200/219736/51384/2047/1290/8842/8557/7545/259236/10002/89780/2487/1735/30812/130497/1301/10736/145258/1296/5764/3549/10…
GO:0008203	cholesterol metabolic process	134	-0.648906	-1.47896	0.000186621	0.00506907	1247	tags=16%, list=7%, signal=15%	3158/1080/3953/319/2246/3952/6770/145264/8435/8431/1066/1056/3990/341/29881/27329/9971/4504/5444/338/335
GO:0046628	positive regulation of insulin receptor signaling pathway	21	-0.84278	-1.68235	0.000203563	0.00550016	628	tags=24%, list=3%, signal=23%	3952/145264/3481/183/9971
GO:0008206	bile acid metabolic process	43	-0.759444	-1.63697	0.000208256	0.00559748	870	tags=42%, list=5%, signal=40%	10858/5629/9023/2494/2264/8309/11001/1645/3952/6770/340895/10998/9965/570/8647/9971/1582/1109
GO:0030198	extracellular matrix organization	349	-0.566851	-1.30459	0.000209519	0.00560211	3632	tags=44%, list=20%, signal=36%	4325/4035/25890/3909/2335/9509/79625/3491/4015/1490/3569/2294/56605/3911/3918/169611/4312/133584/23768/55612/3914/50848/2303/633/780/2683/5155/3691/1303/28984/26585/1511/7124/1295/1515/255743/1289/7837/2331/6678/10266/2247/1277/60484/7412/11096/6662/7093/85301/151887/23213/1999/4237/1287/22795/1293/84168/79148/1302/4239/10630/84570/6939/7045/7148/7042/2191/1281/1462/55959/8038/22798/4982/1305/176…
GO:0007007	inner mitochondrial membrane organization	44	0.56862	1.89982	0.000214385	0.00566782	4403	tags=41%, list=24%, signal=31%	84303/25813/790955/29928/51079/26517/516/513/498/10939/125988/55735/3954/26519/506/65018/8834/54927
GO:0007215	glutamate receptor signaling pathway	88	-0.680022	-1.53312	0.000216388	0.00566782	2402	tags=35%, list=13%, signal=31%	1393/6751/2904/2894/254263/59283/116444/2917/50944/3745/4747/5649/27092/2905/88/23025/2901/54550/54413/2897/2903/2914/2918/146395/23237/2900/2899/2892/2893/2890/2891
GO:0034375	high-density lipoprotein particle remodeling	15	-0.876252	-1.64333	0.000217167	0.00566782	310	tags=47%, list=2%, signal=46%	4023/3990/341/55937/344/213/335
GO:0006558	L-phenylalanine metabolic process	11	-0.918689	-1.69129	0.000219705	0.00566782	132	tags=36%, list=1%, signal=36%	3081/3242/5053/6898
GO:0006559	L-phenylalanine catabolic process	11	-0.918689	-1.69129	0.000219705	0.00566782	132	tags=36%, list=1%, signal=36%	3081/3242/5053/6898
GO:1902221	erythrose 4-phosphate/phosphoenolpyruvate family amino acid metabolic process	11	-0.918689	-1.69129	0.000219705	0.00566782	132	tags=36%, list=1%, signal=36%	3081/3242/5053/6898
GO:1902222	erythrose 4-phosphate/phosphoenolpyruvate family amino acid catabolic process	11	-0.918689	-1.69129	0.000219705	0.00566782	132	tags=36%, list=1%, signal=36%	3081/3242/5053/6898
GO:0030072	peptide hormone secretion	229	-0.5964	-1.37363	0.000220968	0.0056719	3324	tags=33%, list=18%, signal=28%	152/55107/26251/7124/7447/2696/2852/8600/8938/5071/51738/3709/55638/776/3170/6927/57393/6865/640/3767/1906/10815/1393/94121/775/51083/2697/3651/773/222546/3172/2752/150/1956/6755/3745/3741/8862/375704/9254/4843/3814/387597/1268/2645/1080/1394/6343/2740/116/389692/2822/5798/131177/1813/2922/143425/3952/1113/777/6833/1908/7432/6616/3747/8431/4826/2266/169026/9971/2244/7036/2243/7021/7200/5950
GO:0006778	porphyrin-containing compound metabolic process	35	-0.778903	-1.65733	0.000223562	0.00570995	353	tags=11%, list=2%, signal=11%	1543/54658/3263/259
GO:0034308	primary alcohol metabolic process	76	-0.70424	-1.5832	0.000237019	0.00602367	2464	tags=36%, list=13%, signal=31%	653/441282/6817/10170/54361/2819/27284/6799/1646/1583/57016/27233/1645/6783/6121/1543/126/131/130/125/8608/1576/127/1565/1109/7276/5950
GO:0071468	cellular response to acidic pH	11	-0.917575	-1.68923	0.000240629	0.00605077	252	tags=36%, list=1%, signal=36%	342372/5105/27035/10991
GO:0006699	bile acid biosynthetic process	33	-0.797495	-1.68582	0.000240854	0.00605077	619	tags=45%, list=3%, signal=44%	10858/5629/9023/2264/8309/11001/6770/340895/10998/9965/570/8647/9971/1582/1109
GO:0042060	wound healing	492	-0.547717	-1.26529	0.000241621	0.00605077	3329	tags=26%, list=18%, signal=22%	84962/152/151/4352/2737/6382/6469/5159/2627/135/1289/653145/2814/57126/6678/83481/22953/160851/2247/1277/3709/140706/177/3170/9241/340205/5592/8840/10630/1906/3020/5295/7042/2191/1281/171389/954/1634/7222/94121/9620/4778/2621/101929726/348/54361/2263/2626/7035/1278/2027/2151/2697/7057/23208/5156/89780/3172/23414/2064/150/1956/59352/10451/10631/3853/50506/80739/158376/2162/5196/64094/3043/948/3084…
GO:0000098	sulfur amino acid catabolic process	14	-0.88881	-1.65849	0.000243505	0.00606835	231	tags=36%, list=1%, signal=35%	1491/51380/1036/4143/189
GO:1900078	positive regulation of cellular response to insulin stimulus	23	-0.833299	-1.68368	0.000245547	0.00608966	628	tags=22%, list=3%, signal=21%	3952/145264/3481/183/9971
GO:1905952	regulation of lipid localization	123	-0.647061	-1.47052	0.000250826	0.00619067	3178	tags=32%, list=17%, signal=26%	6469/8600/22925/5071/51738/4923/29923/26154/57540/1906/348/51083/4232/2661/7057/1588/4602/1149/4023/948/1394/185/718/222008/5972/3952/6863/5244/341/8529/64240/183/1579/344/9370/5444/64241/338/335
GO:0046503	glycerolipid catabolic process	55	-0.737728	-1.6308	0.000258239	0.00634315	1703	tags=27%, list=9%, signal=25%	285848/4023/133121/2822/123745/283748/2173/3990/341/1373/13/2168/344/338/335
GO:0045834	positive regulation of lipid metabolic process	131	-0.630985	-1.43536	0.000273837	0.00669424	3059	tags=29%, list=17%, signal=24%	7010/83643/2247/64127/84649/388121/57540/552/930/2261/348/54361/3356/5743/5156/10451/2046/134/6343/2822/185/64805/2322/2246/6770/51085/341/13/2168/9104/345275/27329/183/9971/344/9370/2147/335
GO:0051186	cofactor metabolic process	410	-0.559709	-1.29045	0.000283041	0.00688646	1856	tags=12%, list=10%, signal=11%	169355/1646/255027/1956/2348/50506/27306/2878/3043/23205/57016/3039/55350/3158/79966/6947/23305/1645/23498/4025/137902/8876/405753/160728/10840/6999/9027/5644/1543/554235/54658/8529/23743/2939/130013/570/1800/9104/27035/127/2938/54988/4143/51268/10841/4504/3240/1109/3263/259
GO:0002455	humoral immune response mediated by circulating immunoglobulin	40	-0.758724	-1.62059	0.000305621	0.00737641	2013	tags=32%, list=11%, signal=29%	721/720/2302/1191/55061/718/727/722/725/10747/733/729/3263
GO:0043434	response to peptide hormone	392	-0.557935	-1.28666	0.000306052	0.00737641	2185	tags=17%, list=12%, signal=15%	6387/9365/2200/5743/51083/340706/54328/7832/3291/1395/2697/374/4878/1154/2888/1583/3645/3488/4023/4747/375704/7253/9340/84709/2645/1394/2740/5919/2822/5798/88/2660/2069/185/89766/534/493829/5967/5021/6121/7079/3795/3952/6770/5319/145264/7054/5618/7031/5207/5105/525/1036/8614/1373/55532/5313/3481/183/2642/9971/5009/9370/3484/383/197/2155
GO:0015893	drug transport	168	-0.616606	-1.4142	0.000310654	0.00745234	3140	tags=41%, list=17%, signal=34%	135/92745/5071/6505/51738/4923/6531/6536/83849/8973/84258/26266/6865/1906/127833/4151/362/3624/3351/1812/5999/3356/6387/83546/51083/90019/1815/2661/80704/2697/23208/1136/91683/358/57030/2348/3043/8856/3039/6542/6857/1268/6570/225689/6530/6947/57586/146802/55244/6623/1813/6511/6512/3766/2352/6507/143425/83733/1141/4036/56301/160728/477/6580/284111/6506/183/383/10991
GO:0035082	axoneme assembly	58	-0.712453	-1.5789	0.000316775	0.00752884	2878	tags=50%, list=16%, signal=42%	56171/55130/126820/7802/9148/374407/154313/85478/286207/54777/23639/80217/54768/115948/93233/200162/89765/27285/51364/85452/387885/345895/6101/1641/92749/123872/27019/348807/64446
GO:0010804	negative regulation of tumor necrosis factor-mediated signaling pathway	19	-0.840205	-1.65295	0.000316776	0.00752884	142	tags=26%, list=1%, signal=26%	2621/260434/9971/9370/335
GO:0031497	chromatin assembly	153	0.360928	1.47993	0.000322298	0.00762477	2321	tags=22%, list=13%, signal=20%	8339/8347/8367/8365/3006/8343/8351/440689/8970/55839/8349/85236/121504/8091/8341/79019/8294/8370/8360/10036/8357/3017/645996/26155/201254/53615/8344/8353/83743/64061/79172/3159/51548/128312
GO:0030299	intestinal cholesterol absorption	11	-0.915119	-1.68471	0.000327432	0.0077107	1478	tags=82%, list=8%, signal=75%	948/1645/3952/8435/1056/64240/29881/64241/335
GO:0001889	liver development	131	-0.628991	-1.43082	0.000329063	0.00771373	1907	tags=17%, list=10%, signal=15%	3651/89780/3172/2487/1956/5764/3549/4838/57817/5967/123872/1543/54658/5105/1373/570/9104/2267/5009/1361/383/7448
GO:0050890	cognition	264	-0.585679	-1.34739	0.000333665	0.00778606	2402	tags=27%, list=13%, signal=23%	1393/1812/53358/4803/348/3356/5743/57502/139411/7832/5153/2904/8811/9379/65009/6543/4908/54207/28983/164312/1956/57030/50944/57338/3776/5649/134/5803/1268/1621/4885/57144/1394/84630/2740/11202/5764/2019/1620/6547/2558/54413/1813/10882/2903/4137/11170/577/5021/1141/23237/4915/25769/6863/7054/1524/7432/6616/477/54112/2925/793/9378/2628/6900/6532/7143/6529/2890/183
GO:0009226	nucleotide-sugar biosynthetic process	23	0.682739	2.00473	0.000345041	0.00798855	1903	tags=35%, list=10%, signal=31%	5973/51005/91373/54187/2762/5372/29925/4351
GO:0006069	ethanol oxidation	11	-0.914137	-1.68291	0.000345455	0.00798855	302	tags=45%, list=2%, signal=45%	126/131/130/125/127
GO:0031145	anaphase-promoting complex-dependent catabolic process	79	0.448148	1.71462	0.000351283	0.00808689	4243	tags=42%, list=23%, signal=32%	1017/5698/9232/9212/27338/5699/5695/5721/5694/891/5714/701/991/5715/8881/5719/51433/7311/29882/5685/5347/5702/7314/5708/5691/25906/5692/6790/5696/5705/5693/10197/5690
GO:0009074	aromatic amino acid family catabolic process	27	-0.801494	-1.66243	0.000356427	0.00816868	835	tags=33%, list=5%, signal=32%	23498/6999/3034/144193/130013/3242/10841/5053/6898
GO:0046461	neutral lipid catabolic process	34	-0.785469	-1.66671	0.000374859	0.00851507	1703	tags=38%, list=9%, signal=35%	2172/348/285848/4023/2822/2173/3990/1373/13/2168/344/338/335
GO:0046464	acylglycerol catabolic process	34	-0.785469	-1.66671	0.000374859	0.00851507	1703	tags=38%, list=9%, signal=35%	2172/348/285848/4023/2822/2173/3990/1373/13/2168/344/338/335
GO:0042168	heme metabolic process	29	-0.792783	-1.65685	0.000381705	0.0086324	260	tags=10%, list=1%, signal=10%	54658/3263/259
GO:0010038	response to metal ion	333	-0.568503	-1.30912	0.00038429	0.00865273	3091	tags=27%, list=17%, signal=23%	6678/3398/8644/5071/6531/151835/445/7412/83849/4129/4776/84258/1050/1906/5066/127833/9536/4982/7222/1393/7781/6261/56670/120892/4489/5743/6331/90019/7057/3651/23208/30061/359/3208/91683/1956/358/7134/7139/387758/79901/7273/6620/9633/6857/246/9362/6263/2822/6279/3552/26/57586/845/57817/3861/1813/23498/63928/4137/143425/3795/5179/6770/7054/3747/7031/3736/3746/1543/58/366/1261/1373/2266/1800/6529/55…
GO:0033762	response to glucagon	32	-0.784226	-1.64786	0.000393313	0.00881722	1444	tags=25%, list=8%, signal=23%	9340/2740/5207/5105/1036/1373/2642/383
GO:0043062	extracellular structure organization	350	-0.566895	-1.30471	0.000402698	0.00893821	4215	tags=44%, list=23%, signal=35%	4325/4035/56155/25890/3909/2335/9509/79625/3491/4015/1490/3569/2294/56605/3911/3918/169611/4312/133584/23768/55612/3914/50848/2303/633/780/2683/5155/3691/1303/28984/26585/1511/7124/1295/1515/255743/1289/7837/2331/6678/10266/2247/1277/60484/7412/11096/6662/7093/85301/151887/23213/1999/4237/1287/22795/1293/84168/79148/1302/4239/10630/84570/6939/7045/7148/7042/2191/1281/1462/55959/8038/22798/4982/13…
GO:0051904	pigment granule transport	23	0.678798	1.99316	0.000405048	0.00893821	3606	tags=48%, list=20%, signal=38%	4935/4644/5873/585/64284/4647/79083/388552/5874/26258/129880
GO:0046660	female sex differentiation	106	-0.654856	-1.48234	0.000407301	0.00893821	2242	tags=28%, list=12%, signal=25%	54361/269/6586/2661/5156/6092/23414/1588/1299/2620/658/1602/5806/116/117154/5798/2069/89766/56956/2099/3952/4036/3975/283/2255/5241/117/7490/174/5950
GO:0032372	negative regulation of sterol transport	10	-0.918683	-1.65651	0.000407415	0.00893821	267	tags=50%, list=1%, signal=49%	6469/341/64240/344/64241
GO:0032375	negative regulation of cholesterol transport	10	-0.918683	-1.65651	0.000407415	0.00893821	267	tags=50%, list=1%, signal=49%	6469/341/64240/344/64241
GO:0018149	peptide cross-linking	33	-0.788915	-1.66768	0.000414578	0.00905665	2544	tags=67%, list=14%, signal=58%	1281/1634/9806/9333/7057/2312/2162/3858/7053/5266/7047/3713/6700/1475/7051/3848/6698/6703/6704/6705/6699/6707
GO:0051875	pigment granule localization	26	0.672597	2.03522	0.00041832	0.00909968	3606	tags=46%, list=20%, signal=37%	4935/4644/5873/585/64284/26276/4647/79083/388552/5874/26258/129880
GO:0000726	non-recombinational repair	85	0.426795	1.61111	0.00042207	0.00912652	4165	tags=40%, list=23%, signal=31%	8367/8365/121504/8091/8294/8370/10459/8360/55135/158880/9656/79840/472/2067/57109/24144/4292/10039/3980/10721/286257/8363/672/2547/78996/8924/79000/23347/3014/29086/55693/27343/4968/84464
GO:1903036	positive regulation of response to wounding	59	-0.722615	-1.60316	0.000424712	0.00912652	1940	tags=24%, list=11%, signal=21%	7057/150/50506/64094/948/5764/4916/2161/5345/1361/2155/2147/350/7448
GO:0032400	melanosome localization	25	0.66686	2.02109	0.000424887	0.00912652	3606	tags=44%, list=20%, signal=35%	4935/4644/5873/585/64284/26276/79083/388552/5874/26258/129880
GO:0051004	regulation of lipoprotein lipase activity	19	-0.833685	-1.64013	0.000448993	0.00960412	310	tags=47%, list=2%, signal=47%	5125/5046/4023/3990/341/27329/55908/344/350
GO:0009072	aromatic amino acid family metabolic process	37	-0.76201	-1.6219	0.000452484	0.00960698	835	tags=38%, list=5%, signal=36%	57571/389434/169355/23498/7166/7054/6999/3034/144193/130013/3242/10841/5053/6898
GO:0019369	arachidonic acid metabolic process	45	-0.733483	-1.59418	0.000452869	0.00960698	2560	tags=44%, list=14%, signal=38%	66002/9536/59344/5743/5742/27306/246/1562/1564/1572/242/1555/1543/8529/1565/1571/1579/1559/1558/1548
GO:0007423	sensory organ development	492	-0.543262	-1.25499	0.00046713	0.00986871	3603	tags=34%, list=20%, signal=28%	7849/655/6899/6385/2303/1750/51804/7043/9742/780/2535/5080/26018/6096/51168/22899/5914/50937/596/6297/3714/1295/2737/6469/5159/2916/24147/1289/6678/3638/3199/1749/27151/6662/6935/80326/79633/2103/2048/43/2637/9241/10083/23554/4237/1050/5629/64093/125488/1414/4920/1906/6939/2706/7042/4810/652/7483/9368/7111/653/7482/362/10818/7070/3624/9172/57010/9620/9423/168667/10804/2263/775/579/53904/2202/4211…
GO:0009743	response to carbohydrate	206	-0.60188	-1.38567	0.000476379	0.0100229	3504	tags=29%, list=19%, signal=23%	10203/5603/26137/3480/285/55107/7447/2696/1515/2852/8938/6678/22953/51738/55638/177/3170/57393/3767/2621/10804/2626/5743/2697/7057/3651/222546/3172/2752/150/4023/3745/1215/387597/2645/1080/389692/2822/5798/4821/2901/3795/3952/6770/7054/5076/8431/51085/5105/2646/6529/169026/5313/55937/9971/9370/1361/7200/338
GO:0060191	regulation of lipase activity	90	-0.671014	-1.51249	0.000504129	0.0105634	2524	tags=39%, list=14%, signal=34%	5159/22925/653145/2247/6401/1909/552/5125/148/2261/3356/2263/5046/5156/3208/4908/1956/4023/185/64805/2099/56923/4915/5319/283/4916/3990/341/27329/183/55908/117/344/335/350
GO:0032409	regulation of transporter activity	250	-0.582686	-1.34043	0.000513379	0.0107135	2664	tags=28%, list=14%, signal=24%	3767/2859/54209/9368/1393/9722/5243/2273/6236/338440/3788/51083/2904/1815/8811/2697/254263/9001/2056/4878/59283/3270/3208/150/283518/6327/130497/50944/57338/53828/4747/5649/4842/53826/5348/53822/27092/1080/1394/88/2259/844/845/55800/10345/54413/1813/2903/486/23630/146395/23237/6588/3747/148811/477/3736/3746/23704/342667/219527/2892/2893/3359/482/5174/9104/2890/2891/5444
GO:0009064	glutamine family amino acid metabolic process	69	-0.701079	-1.57028	0.000518436	0.0107753	1883	tags=23%, list=10%, signal=21%	2571/420/2752/4843/4842/27165/85300/6507/3034/144193/1373/9971/5009/10841/383/6898
GO:0001578	microtubule bundle formation	86	-0.666743	-1.50102	0.000522628	0.0108186	2019	tags=38%, list=11%, signal=34%	80128/84223/56171/55130/126820/7802/9148/374407/154313/85478/286207/54777/23639/80217/54768/115948/93233/51673/200162/89765/27285/51364/85452/387885/345895/6101/827/1641/92749/123872/27019/348807/64446
GO:0043039	tRNA aminoacylation	48	0.504546	1.737	0.000535868	0.0110296	4845	tags=46%, list=26%, signal=34%	7453/7407/57505/57176/2193/5188/3735/16/9521/3035/80755/5859/23395/8565/123283/833/4141/6301/2617/10667/3376/79587
GO:0030534	adult behavior	124	-0.630294	-1.43207	0.000537118	0.0110296	3164	tags=35%, list=17%, signal=29%	80243/3398/5071/51738/4923/85446/3170/285671/7111/1393/1812/2743/3356/6387/57502/27253/58524/1815/57578/7545/1136/9379/50944/1621/1394/2019/51286/54413/6623/1813/3766/84189/1141/3952/6323/477/9378/6900/525/124925/6506/23544/7200
GO:0032401	establishment of melanosome localization	23	0.665947	1.95542	0.000581499	0.0118934	3606	tags=43%, list=20%, signal=35%	4935/4644/5873/585/64284/79083/388552/5874/26258/129880
GO:0001539	cilium or flagellum-dependent cell motility	88	-0.665577	-1.50056	0.000596627	0.0121063	3242	tags=43%, list=18%, signal=36%	255061/146279/84223/144535/56171/116369/6865/285335/126820/1235/8632/9148/132851/85478/286207/6869/54777/1672/23639/80217/55567/149465/64518/85413/27285/25876/202500/345895/92749/84229/150483/83853/480/27019/11189/83659/9104/338
GO:0060285	cilium-dependent cell motility	88	-0.665577	-1.50056	0.000596627	0.0121063	3242	tags=43%, list=18%, signal=36%	255061/146279/84223/144535/56171/116369/6865/285335/126820/1235/8632/9148/132851/85478/286207/6869/54777/1672/23639/80217/55567/149465/64518/85413/27285/25876/202500/345895/92749/84229/150483/83853/480/27019/11189/83659/9104/338
GO:0018206	peptidyl-methionine modification	12	-0.896257	-1.65708	0.000605174	0.0121976	12	tags=17%, list=0%, signal=17%	51126/335
GO:0034284	response to monosaccharide	185	-0.60197	-1.38154	0.000605877	0.0121976	3476	tags=29%, list=19%, signal=24%	26137/3480/285/55107/7447/2696/1515/2852/8938/6678/51738/55638/177/3170/57393/3767/2621/10804/2626/5743/2697/7057/3651/222546/3172/2752/150/4023/3745/1215/387597/2645/1080/389692/2822/5798/4821/2901/3795/3952/6770/7054/5076/8431/51085/5105/2646/169026/5313/55937/9971/9370/1361/7200
GO:0032402	melanosome transport	22	0.672999	1.92234	0.000628658	0.0126068	3606	tags=45%, list=20%, signal=37%	4935/4644/5873/585/64284/79083/388552/5874/26258/129880
GO:0043270	positive regulation of ion transport	250	-0.579918	-1.33406	0.000661376	0.0131266	3268	tags=34%, list=18%, signal=28%	799/6781/2852/5159/8600/2916/22925/135/22953/4923/6769/776/2048/246329/6865/3767/1906/54209/9368/552/7222/7070/9722/1812/930/2847/5243/2273/348/815/187/6387/3784/51083/1272/6331/1815/8811/9001/4878/57165/3757/150/387129/5649/134/4842/5348/27092/1080/59272/88/2259/844/55800/10345/54413/64805/1813/23630/1141/3952/23237/5319/5244/1908/3747/3736/3746/342667/219527/6532/3359/8529/482/5174/9104/6529/18…
GO:0051591	response to cAMP	93	-0.666392	-1.50408	0.000661376	0.0131266	1696	tags=38%, list=9%, signal=34%	6781/6382/6678/7010/1277/6531/3709/445/1393/2819/3784/374/358/3488/50506/6528/1080/10021/5798/6547/218/5972/5179/6770/5207/5105/366/1036/1261/1373/1811/5313/7490/9370/189
GO:0043038	amino acid activation	49	0.498352	1.7053	0.000664599	0.0131266	4845	tags=45%, list=26%, signal=33%	7453/7407/57505/57176/2193/5188/3735/16/9521/3035/80755/5859/23395/8565/123283/833/4141/6301/2617/10667/3376/79587
GO:0006303	double-strand break repair via nonhomologous end joining	79	0.43712	1.67243	0.000664808	0.0131266	4091	tags=39%, list=22%, signal=31%	8367/8365/121504/8091/8294/8370/10459/8360/55135/158880/9656/79840/472/2067/24144/4292/10039/3980/10721/286257/8363/672/2547/78996/8924/79000/23347/3014/29086/55693/27343
GO:0035235	ionotropic glutamate receptor signaling pathway	23	-0.816676	-1.65009	0.00067974	0.0132914	2040	tags=57%, list=11%, signal=50%	2904/2894/116444/2905/2901/2897/2903/2900/2899/2892/2893/2890/2891
GO:0051703	intraspecies interaction between organisms	48	-0.73326	-1.59777	0.000680924	0.0132914	2141	tags=42%, list=12%, signal=37%	57502/139411/1815/2894/2571/9379/50944/2019/1620/4057/54413/7101/2922/5021/1141/7054/1524/2925/9378/6532
GO:0090303	positive regulation of wound healing	49	-0.736491	-1.61289	0.000680924	0.0132914	258	tags=24%, list=1%, signal=24%	7057/150/50506/64094/948/2161/5345/1361/2155/2147/350/7448
GO:0022898	regulation of transmembrane transporter activity	239	-0.580595	-1.33668	0.000698376	0.0135805	2664	tags=29%, list=14%, signal=25%	3767/2859/54209/9368/1393/9722/5243/2273/6236/338440/3788/51083/2904/1815/8811/2697/254263/9001/2056/4878/59283/3270/3208/150/283518/6327/130497/50944/57338/53828/4747/5649/4842/53826/5348/53822/27092/1080/1394/88/2259/844/845/55800/10345/54413/1813/2903/486/23630/146395/23237/6588/3747/148811/477/3736/3746/23704/342667/219527/2892/2893/3359/482/5174/9104/2890/2891
GO:0044058	regulation of digestive system process	31	-0.783088	-1.64032	0.000716375	0.0138779	2140	tags=45%, list=12%, signal=40%	3784/5731/358/6343/7032/57817/5733/5021/3952/6863/2255/64240/64241/335
GO:0032412	regulation of ion transmembrane transporter activity	232	-0.590276	-1.35901	0.000726125	0.0140139	2664	tags=31%, list=14%, signal=27%	4923/6769/776/2048/246329/3767/2859/54209/9368/1393/9722/5243/2273/6236/338440/3788/51083/2904/1815/8811/254263/9001/2056/4878/59283/3270/3208/150/283518/6327/130497/50944/57338/53828/4747/5649/4842/53826/5348/53822/27092/1080/1394/88/2259/844/845/55800/10345/54413/1813/2903/486/23630/146395/23237/6588/3747/477/3736/3746/23704/342667/219527/2892/2893/3359/482/5174/9104/2890/2891
GO:0055078	sodium ion homeostasis	43	-0.738705	-1.59226	0.000754741	0.0145116	2723	tags=65%, list=15%, signal=56%	6558/135/6337/6559/1906/66002/552/6340/80763/64699/6338/10699/478/134/479/4881/185/1813/6863/6557/477/480/8529/525/482/183/1579/7021
GO:0007631	feeding behavior	74	-0.682397	-1.53544	0.000763125	0.0146181	2354	tags=39%, list=13%, signal=34%	3351/1812/2847/51083/9464/8811/257194/8862/1602/1268/1394/339403/2019/59272/283869/1271/3953/1813/5021/5972/1141/3952/56923/4915/7054/5697/183/4886/7200
GO:0032368	regulation of lipid transport	94	-0.652382	-1.474	0.000772375	0.0147402	3178	tags=33%, list=17%, signal=27%	6469/8600/22925/5071/51738/4923/26154/57540/1906/348/51083/2661/7057/1588/4602/1394/185/5972/3952/6863/5244/341/8529/64240/183/1579/344/9370/5444/64241/335
GO:0034728	nucleosome organization	141	0.353183	1.45416	0.00077966	0.0147757	3664	tags=34%, list=20%, signal=27%	8339/8347/8367/8365/3006/8343/8351/440689/8970/55839/8349/85236/121504/8341/79019/8294/8370/8360/10036/92815/8357/3017/645996/201254/8344/8353/83743/64061/79172/3159/128312/55355/8340/55929/4674/6598/80152/8208/7290/8355/4678/8363/4171/57082/1058/10541/8607/23523
GO:0050806	positive regulation of synaptic transmission	154	-0.607484	-1.38766	0.000781624	0.0147757	3390	tags=45%, list=18%, signal=37%	783/760/7124/2852/135/8938/4900/4923/776/2048/177/4776/10858/6865/4920/148/1812/348/5999/5743/112755/3908/2904/1815/1395/5913/9001/59283/6543/91683/2752/1956/50944/3814/5649/134/6857/1268/27092/1394/2905/116/5764/794/26045/23025/6547/54413/1813/7476/2903/7101/11170/5021/6507/143425/1141/23237/4915/25769/6863/1524/10590/6616/793/9378/140730/347730/64084/7143
GO:0006283	transcription-coupled nucleotide-excision repair	73	0.450174	1.65618	0.000782867	0.0147757	5949	tags=52%, list=32%, signal=35%	5435/2068/5434/5425/3978/5424/10450/57804/2067/5441/3980/6117/7311/2968/56949/7314/57461/5430/1642/902/2873/9978/27339/5983/2966/50813/64708/2071/6118/10920/91603/5436/8533/5984/2965/10980/5433/5982
GO:0006855	drug transmembrane transport	68	-0.687911	-1.53502	0.000806458	0.0151652	1696	tags=28%, list=9%, signal=25%	80704/358/57030/2348/6542/146802/55244/6511/6512/3766/6507/83733/4036/477/6580/284111/6506/183/10991
GO:0044241	lipid digestion	13	-0.882937	-1.6473	0.000821178	0.0153856	1478	tags=69%, list=8%, signal=64%	948/1645/3952/8435/1056/64240/29881/64241/335
GO:0009746	response to hexose	180	-0.60282	-1.38417	0.000827874	0.0154547	3476	tags=29%, list=19%, signal=24%	26137/3480/285/55107/7447/2696/1515/2852/8938/51738/55638/177/3170/57393/3767/2621/10804/2626/5743/2697/7057/3651/222546/3172/2752/150/4023/3745/1215/387597/2645/1080/389692/2822/5798/4821/2901/3795/6770/7054/5076/8431/51085/5105/2646/169026/5313/55937/9971/9370/1361/7200
GO:0010447	response to acidic pH	21	-0.822442	-1.64175	0.000832659	0.0154877	1275	tags=24%, list=7%, signal=22%	40/5105/6750/27035/10991
GO:0048732	gland development	403	-0.551505	-1.27122	0.000846374	0.015686	3710	tags=29%, list=20%, signal=24%	7849/655/6899/5454/5106/51804/7043/780/540/5080/3082/2252/9914/7421/5914/7124/596/7473/2737/6469/8600/2627/3398/3219/6531/445/6662/27122/80326/23213/1999/6927/9241/1050/5629/3175/3664/5066/7042/652/9368/3400/55959/367/7481/10818/9423/54361/2263/8456/9464/10913/2049/9148/2697/374/3651/5156/3213/89780/3172/2487/1588/1956/3488/59277/7038/768239/8862/3084/6657/1394/2304/2001/116/5764/3549/5087/57864/…
GO:0061008	hepaticobiliary system development	134	-0.630644	-1.43734	0.000874123	0.016142	1907	tags=17%, list=10%, signal=15%	3651/89780/3172/2487/1956/64321/5764/3549/4838/57817/5967/123872/1543/54658/5105/1373/570/9104/2267/5009/1361/383/7448
GO:0014074	response to purine-containing compound	141	-0.617881	-1.40987	0.000892623	0.0164245	3243	tags=33%, list=18%, signal=28%	6781/6382/135/6678/22953/7010/1277/5029/6531/3709/445/3767/7222/1393/6261/2819/5743/3784/374/358/3488/50506/6263/6528/1080/10021/5798/845/6547/64805/218/5972/5179/6770/5207/6532/5105/366/1036/1261/1373/1811/6529/5313/7490/9370/189
GO:0006536	glutamate metabolic process	31	-0.778843	-1.63143	0.000899276	0.0164879	1883	tags=32%, list=10%, signal=29%	2571/2752/27165/85300/6507/3034/144193/9971/10841/6898
GO:0006415	translational termination	104	0.378082	1.45599	0.000903427	0.016505	6664	tags=60%, list=36%, signal=38%	64975/143244/54998/51116/65080/327/51253/116541/55052/90480/122704/64976/64432/6150/6182/124995/64963/1984/28973/63875/10573/64960/64969/55168/64951/51504/65003/6183/78988/65993/84545/54948/118487/54516/2733/51642/116540/91574/64965/51264/51258/64981/23107/51650/51069/55239/56648/29074/26589/51023/5018/84340/54148/6059/64968/65008/2107/54534/51649/51081/26284/65094
GO:0035270	endocrine system development	109	-0.642145	-1.45673	0.000938873	0.0170314	3710	tags=39%, list=20%, signal=31%	7849/6899/5454/406/5080/3110/2696/6469/2627/6531/6662/27122/3170/9241/3175/652/653/7481/54361/3651/5156/3213/222546/3172/7038/6657/1394/2304/116/4821/5087/6496/1813/7080/3642/2625/5075/4487/2255/429/7490/335
GO:0043648	dicarboxylic acid metabolic process	93	-0.661912	-1.49397	0.000938873	0.0170314	2197	tags=22%, list=12%, signal=19%	130752/5264/2571/2752/2348/8528/27165/85300/23498/6507/6770/7054/10840/3034/144193/5105/130013/9971/10841/6898
GO:0099601	regulation of neurotransmitter receptor activity	64	-0.689077	-1.53358	0.00094794	0.0171353	2402	tags=38%, list=13%, signal=33%	1393/130574/2904/254263/59283/130576/50944/66004/4747/5649/4885/27092/88/54413/8000/2903/4884/146395/23237/57152/2892/2893/2890/2891
GO:0032369	negative regulation of lipid transport	23	-0.809864	-1.63633	0.000951631	0.0171417	267	tags=26%, list=1%, signal=26%	7057/341/8529/64240/344/64241
GO:0007626	locomotory behavior	177	-0.603197	-1.38536	0.000957464	0.0171543	3164	tags=34%, list=17%, signal=29%	80243/2916/135/3398/5071/4923/6531/3170/9099/83715/6414/7111/1812/9620/2743/348/120892/6387/4211/5153/58524/1815/7545/2571/1136/64072/27306/257194/3084/1621/57144/1394/2019/51286/6623/1813/10882/3751/3766/7080/84189/1141/5179/57282/6323/7054/6616/477/54112/793/57152/6900/1826/4857/347730/7143/124925/460/23544/4886/7200
GO:0007035	vacuolar acidification	21	0.671772	1.90824	0.000959501	0.0171543	1842	tags=38%, list=10%, signal=34%	1657/50617/245972/54982/535/155066/2896/9114
GO:0010972	negative regulation of G2/M transition of mitotic cell cycle	86	0.410264	1.54317	0.000962356	0.0171543	4520	tags=44%, list=25%, signal=33%	8091/5698/63967/54984/4998/990/9212/60672/5699/84446/5695/27183/5721/472/5694/90381/80279/641/5714/5715/5719/29997/672/5685/5702/5708/5691/5692/6790/5696/9344/5705/5693/10197/5690/9978/51347/29980
GO:0006958	complement activation, classical pathway	27	-0.780831	-1.61957	0.000970404	0.0172379	2013	tags=41%, list=11%, signal=36%	721/720/1191/55061/718/727/722/725/10747/733/729
GO:0048259	regulation of receptor-mediated endocytosis	91	-0.656178	-1.48082	0.000994645	0.0176076	2020	tags=22%, list=11%, signal=20%	1815/23208/89780/3208/4908/8862/6424/1191/26045/718/54550/1813/146395/23237/341/347730/284654/344/7018/7448
GO:0051905	establishment of pigment granule localization	24	0.672008	1.9677	0.00100769	0.0177355	3606	tags=46%, list=20%, signal=37%	4935/4644/5873/585/64284/4647/79083/388552/5874/26258/129880
GO:0002504	antigen processing and presentation of peptide or polysaccharide antigen via MHC class II	97	0.398687	1.52028	0.00100878	0.0177355	3288	tags=39%, list=18%, signal=32%	8905/3902/1514/3123/3797/6456/1175/3108/3117/1780/3111/3115/2207/11004/8722/3127/3119/3118/1509/8907/3835/3113/3109/6396/3122/162/1174/9493/3120/972/2213/130340/81930/10121/64837/1639/1778/10437
GO:0010875	positive regulation of cholesterol efflux	16	-0.845764	-1.61635	0.00101857	0.0178464	60	tags=31%, list=0%, signal=31%	26154/348/9370/5444/335
GO:0001919	regulation of receptor recycling	23	0.645625	1.89575	0.00103023	0.0179893	536	tags=22%, list=3%, signal=21%	6622/27065/125058/22876/11149
GO:0051497	negative regulation of stress fiber assembly	20	0.688954	1.91914	0.00103741	0.0180533	2726	tags=50%, list=15%, signal=43%	23671/395/4233/79822/7454/51763/10391/3925/10395/5216
GO:0042742	defense response to bacterium	172	-0.601624	-1.3807	0.00105042	0.0181566	2995	tags=34%, list=16%, signal=29%	64127/22861/11096/338376/3593/5473/54209/149233/10563/58985/387695/6372/57402/671/6364/6590/7100/23208/5544/254773/3853/646627/5320/6280/1672/575/57115/948/4843/114771/5919/6279/4057/163351/6278/11005/57817/84659/1755/4025/6441/2220/5650/1113/5319/6283/128488/566/116842/25818/3929/5225/388646/9971/2244/2243/3240/114770/2147
GO:0072006	nephron development	135	-0.618921	-1.41084	0.00105042	0.0181566	3984	tags=47%, list=22%, signal=37%	9863/9788/57216/3911/4854/947/7849/655/51196/2028/2303/51804/5155/5420/285/596/2737/6469/255743/5159/7010/2247/6662/79633/23213/9241/26249/652/55959/7482/7481/54361/80310/153572/84623/8842/5156/2302/4868/30812/79191/130497/388585/10736/7475/170690/8710/5800/5087/5979/80000/2246/3975/2625/79192/5455/5076/793/2719/183/7490/9370/7021
GO:0030970	retrograde protein transport, ER to cytosol	28	0.625488	1.93594	0.00111958	0.0192226	4909	tags=71%, list=27%, signal=52%	9709/9695/6400/7353/55829/81502/550/92305/84447/10952/7184/55666/91319/55741/10956/51009/9024/51465/7327/258010
GO:1903513	endoplasmic reticulum to cytosol transport	28	0.625488	1.93594	0.00111958	0.0192226	4909	tags=71%, list=27%, signal=52%	9709/9695/6400/7353/55829/81502/550/92305/84447/10952/7184/55666/91319/55741/10956/51009/9024/51465/7327/258010
GO:0006418	tRNA aminoacylation for protein translation	45	0.508284	1.73738	0.00113636	0.0194458	6296	tags=64%, list=34%, signal=42%	7453/7407/57505/57176/2193/3735/16/9521/3035/80755/5859/23395/8565/123283/833/4141/6301/2617/10667/3376/79587/4677/7965/55152/5917/79731/51520/54938/27068
GO:0006414	translational elongation	130	0.356917	1.48036	0.00115075	0.0196265	6229	tags=52%, list=34%, signal=34%	64975/143244/54998/51116/65080/51253/116541/55052/90480/122704/64976/64432/1938/9567/6150/6182/9728/60678/16/124995/64963/1984/1802/1801/28973/63875/10573/132864/1937/22849/80325/64960/92715/10399/64969/55168/7284/64951/65003/6183/78988/65993/6181/6176/84545/54948/118487/10767/90850/51642/116540/285381/1936/64965/51264/51258/64981/23107/51650/54676/51069/56648/29074/26589/51023/5018/79631
GO:0055123	digestive system development	135	-0.617567	-1.40776	0.00116197	0.0197522	3295	tags=39%, list=18%, signal=32%	7124/596/79827/2737/6469/2627/3398/3576/445/93649/79633/7042/652/1281/5125/7481/2263/2626/579/2049/3651/5156/1956/91461/64321/10736/56033/6423/2304/6343/5919/60529/3549/4821/6425/4838/5979/140628/5967/5021/887/2254/1045/123872/51208/1543/5697/6664/2255/1373/3481/429/5009
GO:1904062	regulation of cation transmembrane transport	307	-0.561197	-1.29272	0.00118056	0.020002	2414	tags=29%, list=13%, signal=26%	4923/57628/6769/776/2048/80333/246329/3767/2859/54209/9368/7070/1393/9722/1812/930/2273/6236/117532/3788/5999/187/775/3784/51083/6331/2904/1815/8811/254263/9001/2056/4878/59283/3270/3208/57165/3757/150/283518/387129/6327/130497/50944/57338/53828/4747/5649/4842/53826/5348/53822/27092/1394/88/2259/844/845/55800/10345/54413/57817/1813/2903/486/23630/786/146395/23237/6588/1908/3747/148811/477/3736/37…
GO:0042407	cristae formation	33	0.573539	1.82171	0.00119914	0.0202499	4403	tags=39%, list=24%, signal=30%	84303/25813/790955/516/513/498/10939/125988/55735/3954/506/65018/54927
GO:0035176	social behavior	47	-0.727059	-1.58712	0.00120776	0.0203286	2141	tags=40%, list=12%, signal=36%	57502/139411/1815/2894/2571/9379/50944/2019/1620/54413/7101/2922/5021/1141/7054/1524/2925/9378/6532
GO:1902475	L-alpha-amino acid transmembrane transport	46	-0.722945	-1.57345	0.00123459	0.0207124	2268	tags=33%, list=12%, signal=29%	5999/81539/57030/6542/6511/11136/6512/3766/6507/83733/56301/477/6506/183/10991
GO:0003014	renal system process	106	-0.636556	-1.44092	0.00127351	0.0212266	3300	tags=42%, list=18%, signal=35%	2013/596/1364/6781/135/8644/2702/23213/6927/1906/26249/652/66002/9368/552/55959/5125/148/56670/2621/80763/3784/3291/2697/1136/359/10699/358/3043/134/4881/5800/185/1813/5972/1141/6863/8529/525/361/183/1579/5345/9370/7021
GO:0007416	synapse assembly	161	-0.604879	-1.38476	0.00127351	0.0212266	3004	tags=35%, list=16%, signal=30%	51738/56131/2048/43/119/8927/347902/57633/53942/5789/1812/9806/9423/2239/57502/27253/2049/84623/2047/9379/89780/6092/4897/2561/50944/576/27286/575/3084/6585/94030/79953/40/26045/2555/54413/1813/7476/577/5021/2066/84189/1141/4915/147381/375323/92737/4916/54674/9378/1056/1826/347730/22865/64084/2596/2823
GO:0042698	ovulation cycle	61	-0.696574	-1.55126	0.00127772	0.0212279	2611	tags=39%, list=14%, signal=34%	5066/7042/3624/6586/2661/5156/6092/1956/3036/2620/658/4316/3814/5806/5764/5798/2660/2069/5021/7079/2099/3952/5241/174
GO:0042391	regulation of membrane potential	378	-0.553579	-1.27605	0.0012921	0.0213288	3077	tags=34%, list=17%, signal=29%	5071/22953/2702/51738/4923/776/3786/8973/6326/51305/2563/116443/343450/56660/3767/1906/2859/2564/54209/55879/3762/1634/388135/148/9722/1812/63895/2273/2743/5999/259232/1134/120892/775/6329/57502/3784/112755/6331/219736/2904/56659/1815/83875/2697/2894/254263/773/4878/1136/54207/23416/3757/4897/57030/6327/2561/50944/3745/3741/11280/948/478/3776/5649/134/1268/89822/56853/5348/1146/40/27092/1080/2905…
GO:0071375	cellular response to peptide hormone stimulus	289	-0.558541	-1.28536	0.0012921	0.0213288	2662	tags=18%, list=14%, signal=16%	1906/2706/5295/2690/2798/1393/11031/815/9365/2200/340706/54328/1395/1154/2888/1583/3645/4023/375704/7253/9340/84709/2645/1394/2740/5919/2822/88/2660/185/89766/534/493829/5967/6121/3952/6770/5319/145264/5618/5105/525/1373/55532/5313/3481/183/2642/9971/9370/3484/383/197
GO:0140115	export across plasma membrane	38	-0.743167	-1.58596	0.00130172	0.0214186	2140	tags=42%, list=12%, signal=37%	3784/4878/30061/3757/3741/478/5348/479/6547/486/23630/477/23704/480/482/5174
GO:0090207	regulation of triglyceride metabolic process	30	-0.784778	-1.64052	0.00131729	0.0214466	1142	tags=23%, list=6%, signal=22%	2822/718/145264/7069/13/9104/344
GO:0007588	excretion	54	-0.701355	-1.54851	0.00131756	0.0214466	2676	tags=50%, list=15%, signal=43%	6865/1906/9368/552/148/6340/80763/1136/6338/10699/4868/363/134/4881/185/1813/1141/6863/5455/10686/366/525/64240/1811/54577/183/64241
GO:0032373	positive regulation of sterol transport	21	-0.810386	-1.61768	0.00132013	0.0214466	579	tags=29%, list=3%, signal=28%	26154/348/5244/9370/5444/335
GO:0032376	positive regulation of cholesterol transport	21	-0.810386	-1.61768	0.00132013	0.0214466	579	tags=29%, list=3%, signal=28%	26154/348/5244/9370/5444/335
GO:0006006	glucose metabolic process	190	-0.588586	-1.35171	0.00132928	0.0215272	1388	tags=11%, list=8%, signal=10%	648791/2645/2822/3953/3795/3952/145264/10993/4485/5207/5105/2646/9104/5313/3481/2642/9370/4886/7021/229/5950
GO:0006835	dicarboxylic acid transport	88	-0.652743	-1.47162	0.00136647	0.0220598	1825	tags=28%, list=10%, signal=26%	2917/57030/2348/8499/134/6857/27165/115019/115111/6511/6512/3766/2352/6507/83733/4915/4036/6616/477/1811/284111/6506/9058/7200/189
GO:0035150	regulation of tube size	125	-0.628984	-1.42983	0.00137993	0.0220689	3324	tags=40%, list=18%, signal=33%	152/151/2852/135/2702/5029/1909/5592/1906/552/1131/148/3351/1812/348/3356/5743/3363/2697/4878/1907/150/1956/3741/8862/4880/3043/134/4842/1621/1311/40/4881/116/59272/185/5021/3952/1113/1908/7432/477/6532/1373/2266/4922/183/2244/5345/2243
GO:0035296	regulation of tube diameter	125	-0.628984	-1.42983	0.00137993	0.0220689	3324	tags=40%, list=18%, signal=33%	152/151/2852/135/2702/5029/1909/5592/1906/552/1131/148/3351/1812/348/3356/5743/3363/2697/4878/1907/150/1956/3741/8862/4880/3043/134/4842/1621/1311/40/4881/116/59272/185/5021/3952/1113/1908/7432/477/6532/1373/2266/4922/183/2244/5345/2243
GO:0097746	regulation of blood vessel diameter	125	-0.628984	-1.42983	0.00137993	0.0220689	3324	tags=40%, list=18%, signal=33%	152/151/2852/135/2702/5029/1909/5592/1906/552/1131/148/3351/1812/348/3356/5743/3363/2697/4878/1907/150/1956/3741/8862/4880/3043/134/4842/1621/1311/40/4881/116/59272/185/5021/3952/1113/1908/7432/477/6532/1373/2266/4922/183/2244/5345/2243
GO:1903779	regulation of cardiac conduction	66	-0.695281	-1.54832	0.00138771	0.0221245	1890	tags=36%, list=10%, signal=33%	4878/3270/10699/6543/53828/4880/478/4842/6263/53826/5348/53822/4881/59272/844/845/6547/10345/486/477/480/491/482/183
GO:0032102	negative regulation of response to external stimulus	337	-0.55295	-1.27315	0.00147801	0.0234912	3655	tags=29%, list=20%, signal=24%	10500/693175/239/4345/5155/284340/10203/3082/1003/285/26585/7850/146760/7473/2852/27250/135/83481/7010/284467/2247/7105/51738/6531/6405/114899/338557/177/3593/116443/79148/5592/53833/1906/2191/10563/171389/56920/11240/1812/80031/348/54361/5654/80763/7035/9723/7130/2697/7057/5156/89780/2840/6092/1588/56963/134/116379/58529/54437/11202/116/5800/6288/27202/4057/55966/199713/170692/6318/11005/1813/50…
GO:0060330	regulation of response to interferon-gamma	23	-0.800461	-1.61733	0.00148763	0.0234985	48	tags=17%, list=0%, signal=17%	7294/5469/383/3263
GO:0060334	regulation of interferon-gamma-mediated signaling pathway	23	-0.800461	-1.61733	0.00148763	0.0234985	48	tags=17%, list=0%, signal=17%	7294/5469/383/3263
GO:0022602	ovulation cycle process	40	-0.730264	-1.5598	0.00154084	0.0242643	2611	tags=45%, list=14%, signal=39%	5066/7042/3624/6586/2661/5156/6092/2620/658/3814/5806/5798/2660/2069/2099/3952/5241/174
GO:0001921	positive regulation of receptor recycling	14	0.768612	1.99634	0.00157303	0.0246956	536	tags=29%, list=3%, signal=28%	6622/27065/22876/11149
GO:0006383	transcription by RNA polymerase III	54	0.463717	1.63509	0.00158	0.0247294	2976	tags=28%, list=16%, signal=23%	5435/10178/10622/6618/661/2975/5434/2475/171568/9519/4665/57521/9328/5441/6621
GO:0019216	regulation of lipid metabolic process	373	-0.546752	-1.26015	0.00160815	0.0250934	2330	tags=21%, list=13%, signal=19%	2852/5159/80183/3398/8644/3638/7010/83643/2247/64127/84649/27122/388121/5629/57540/5295/552/653/930/2264/2261/348/54361/57678/3356/27063/5743/51083/5156/3172/1154/150/1149/10451/50486/2046/768239/375704/948/134/1268/3158/6343/53345/5919/2822/185/85329/718/12/64805/2322/887/2246/3952/6770/145264/5244/340895/51085/1543/9965/341/54658/7069/13/2168/9104/345275/27329/183/9971/55908/1579/344/9370/338/2…
GO:0009225	nucleotide-sugar metabolic process	38	0.541609	1.77518	0.00163181	0.0253523	1932	tags=32%, list=11%, signal=28%	5973/55790/51005/91373/54187/2762/5372/29925/2135/4351/4245/10020
GO:0046326	positive regulation of glucose import	33	-0.765245	-1.61765	0.00163462	0.0253523	352	tags=15%, list=2%, signal=15%	2719/9965/55600/6506/9370
GO:0032781	positive regulation of ATPase activity	53	-0.715531	-1.57695	0.0016522	0.0255478	818	tags=11%, list=4%, signal=11%	7139/4634/2255/482/9104/229
GO:0010569	regulation of double-strand break repair via homologous recombination	45	0.499069	1.70588	0.00167111	0.0257626	5464	tags=44%, list=30%, signal=31%	56154/10459/55137/7454/5888/55135/158880/51548/64210/10721/23028/54386/2187/23347/1111/51750/112441434/6118/8914/9400
GO:0001895	retina homeostasis	61	-0.689863	-1.53631	0.00174589	0.0268053	1978	tags=26%, list=11%, signal=23%	8842/1258/64072/92211/7399/4057/65217/24/158046/6101/6121/3848/1472/7018/213/5304
GO:0007006	mitochondrial membrane organization	128	0.356173	1.51286	0.00174919	0.0268053	4194	tags=35%, list=23%, signal=27%	6622/84303/3002/1267/8326/3303/25813/92609/581/90529/1869/790955/29928/51079/79594/5533/26517/516/664/8996/513/54978/498/84266/27113/572/56993/10939/2055/808/64112/125988/55735/3954/26519/506/203245/23593/89941/81554/6687/9927/4836/65018/8834
GO:0050994	regulation of lipid catabolic process	48	-0.713959	-1.55571	0.00178967	0.0273298	1710	tags=27%, list=9%, signal=25%	150/1149/134/1268/6343/5919/2822/85329/341/13/2168/27329/344
GO:0007613	memory	108	-0.634896	-1.44066	0.00179406	0.0273298	2344	tags=32%, list=13%, signal=28%	1812/4803/348/3356/5743/6543/4908/54207/164312/57030/50944/57338/3776/5649/1268/1621/57144/1394/11202/5764/1620/6547/1813/2903/4137/5021/1141/23237/25769/6863/7054/1524/793/6532/2890
GO:0033273	response to vitamin	85	-0.670455	-1.50715	0.00181174	0.0273966	2289	tags=25%, list=12%, signal=22%	2621/1592/2626/5743/1591/3651/2056/1956/249/2348/10631/5764/57817/5179/3952/1543/8614/429/5009/383/2155
GO:0010469	regulation of signaling receptor activity	141	-0.607646	-1.38652	0.00181265	0.0273966	2448	tags=35%, list=13%, signal=30%	100463482/10268/729993/26585/152/151/799/100462981/27122/2048/9241/27123/1393/23641/130574/2904/9148/254263/116372/59283/100463486/130576/150/50944/100462977/66004/4747/5649/134/4885/27092/88/2069/54413/124857/8000/2903/4884/4062/146395/255324/23237/57152/2892/2893/131/2890/27121/2891
GO:2000108	positive regulation of leukocyte apoptotic process	25	0.618523	1.87459	0.00181445	0.0273966	2468	tags=40%, list=13%, signal=35%	3620/5027/5293/5133/6352/8013/581/84807/29126/5291
GO:0030318	melanocyte differentiation	24	0.652764	1.91136	0.00186571	0.0280156	772	tags=42%, list=4%, signal=40%	4286/1910/7306/4435/4644/4948/5873/81285/89781/9839
GO:0044070	regulation of anion transport	83	-0.656523	-1.4744	0.00186806	0.0280156	2662	tags=33%, list=14%, signal=28%	1906/2564/552/5243/338440/348/5999/7057/2917/130497/6424/134/1080/59272/6098/3952/5244/477/8529/5174/6529/183/1579/383/7200/335/10991
GO:0032543	mitochondrial translation	135	0.337442	1.30765	0.00187182	0.0280156	6662	tags=52%, list=36%, signal=33%	64975/285367/57505/54998/51116/65080/51253/116541/55052/90480/122704/64976/64432/5188/6150/6182/124995/84769/6472/64963/3035/23395/26995/28973/63875/10573/84881/81554/708/64960/130916/2617/64969/55168/7284/64951/65003/6183/78988/65993/84545/54948/28958/118487/54516/51642/116540/64965/51264/51258/64981/23107/51650/92170/51069/29074/26589/51023/5018/84340/54148/64968/55278/65008/54534/51649/51335/1…
GO:0030949	positive regulation of vascular endothelial growth factor receptor signaling pathway	15	-0.838719	-1.57294	0.00187997	0.0280557	672	tags=33%, list=4%, signal=32%	8817/2254/2255/4504/7448
GO:1905953	negative regulation of lipid localization	37	-0.739044	-1.57301	0.00188912	0.0281106	628	tags=16%, list=3%, signal=16%	3952/341/8529/64240/344/64241
GO:0006289	nucleotide-excision repair	106	0.375976	1.4279	0.00192357	0.0285405	5500	tags=42%, list=30%, signal=30%	5435/252969/2068/5434/11284/5425/3978/5424/10450/57804/2067/64210/5441/3980/6117/7311/2968/7508/56949/5886/7314/57461/5430/1643/27343/1642/9557/4968/84464/902/2873/9978/27339/5426/5983/2966/50813/64708/2071/6118/10920/91603/5436/8533/5984
GO:0071320	cellular response to cAMP	51	-0.702005	-1.54322	0.00194206	0.0287317	2402	tags=33%, list=13%, signal=29%	1393/2819/3784/358/3488/6528/1080/10021/6547/5179/6770/5105/366/1373/1811/7490/9370
GO:0009749	response to glucose	175	-0.595816	-1.36875	0.00196175	0.0289397	3476	tags=29%, list=19%, signal=23%	26137/3480/285/55107/7447/2696/1515/2852/8938/51738/55638/177/3170/57393/3767/2621/10804/2626/2697/7057/3651/222546/3172/2752/150/4023/3745/1215/387597/2645/1080/389692/2822/5798/4821/2901/3795/6770/7054/5076/8431/51085/5105/169026/5313/55937/9971/9370/1361/7200
GO:0150063	visual system development	332	-0.554031	-1.27586	0.00199911	0.0294064	3333	tags=30%, list=18%, signal=25%	5914/50937/596/6297/1295/2737/6469/5159/2916/24147/1289/27151/6662/6935/2048/43/10083/23554/4237/5629/64093/1414/7042/4810/652/7483/7111/7482/362/10818/7070/3624/9172/57010/775/2202/4211/2200/51384/2047/1290/8842/5158/2697/5156/10002/1746/3208/1735/30812/1956/57030/7399/658/388585/1296/7475/10586/6657/56853/5764/3549/718/10265/170692/84465/6496/64805/5979/7476/146862/6101/7101/121643/4693/8736/61…
GO:0045721	negative regulation of gluconeogenesis	16	-0.830715	-1.58759	0.00202457	0.0296958	1254	tags=31%, list=7%, signal=29%	2645/3953/145264/4485/9370
GO:0071941	nitrogen cycle metabolic process	13	-0.86591	-1.61553	0.00207238	0.0303104	217	tags=38%, list=1%, signal=38%	1373/9971/5009/1559/383
GO:0046364	monosaccharide biosynthetic process	83	-0.654795	-1.47051	0.00209428	0.0305436	1254	tags=14%, list=7%, signal=14%	2645/3953/3952/145264/10993/4485/5207/5105/9104/9370/229/5950
GO:0050796	regulation of insulin secretion	162	-0.595634	-1.36355	0.00214858	0.0311585	3324	tags=33%, list=18%, signal=27%	152/55107/26251/7124/7447/2696/2852/8938/5071/51738/3709/55638/776/3170/57393/640/3767/94121/775/2697/3651/773/222546/3172/2752/150/6755/3745/3741/375704/9254/4843/1268/2645/1080/2740/2822/131177/1813/143425/3952/1113/777/6833/6616/3747/8431/4826/169026/9971/7021/7200/5950
GO:0097237	cellular response to toxic substance	220	-0.570128	-1.31228	0.00214858	0.0311585	2293	tags=16%, list=12%, signal=14%	2944/348/120892/80310/5743/7732/389434/5742/4602/358/50506/6280/2878/3043/948/57016/3039/4025/137902/7054/3747/5076/4487/54658/1373/9283/2168/9104/127/2938/55937/4504/383/213/3240
GO:1903793	positive regulation of anion transport	45	-0.70657	-1.53569	0.00219091	0.031683	1238	tags=22%, list=7%, signal=21%	1080/59272/5244/8529/6529/183/1579/7200/335/10991
GO:0006335	DNA replication-dependent nucleosome assembly	22	0.628205	1.79439	0.00222009	0.0317932	3280	tags=64%, list=18%, signal=52%	8367/8365/8351/121504/8294/8370/8360/10036/8357/8353/8208/8355/4678/8363
GO:0034723	DNA replication-dependent nucleosome organization	22	0.628205	1.79439	0.00222009	0.0317932	3280	tags=64%, list=18%, signal=52%	8367/8365/8351/121504/8294/8370/8360/10036/8357/8353/8208/8355/4678/8363
GO:0019627	urea metabolic process	12	-0.869369	-1.60737	0.00222129	0.0317932	217	tags=42%, list=1%, signal=41%	1373/9971/5009/1559/383
GO:0050808	synapse organization	382	-0.546785	-1.26006	0.00222331	0.0317932	3656	tags=34%, list=20%, signal=28%	3706/56132/8321/51804/266977/25791/1942/3480/783/22899/7162/9231/7124/26052/4774/1821/84966/8404/6678/22953/51738/56131/6405/55638/26059/2048/43/4776/1287/119/54209/80725/58512/8927/347902/57633/53942/5063/9722/5789/1812/9806/9423/57549/2239/2743/348/1134/120892/57502/9723/23114/27253/2049/84623/2904/9148/2047/5913/7846/9379/89780/6092/2064/4897/2561/50944/576/27286/575/4747/1006/9254/9499/3084/8…
GO:0006936	muscle contraction	320	-0.55216	-1.27188	0.00226067	0.0321484	3324	tags=36%, list=18%, signal=30%	152/151/4621/6781/2852/57057/255743/22953/2702/51738/6769/93649/776/7138/23213/246329/1909/26287/5592/6865/1906/3762/55959/1131/7111/4151/148/9722/6261/9172/8082/1812/1134/3356/775/80763/2626/6329/5743/3784/6331/3363/8811/8557/2697/126393/4878/1136/3270/1907/3757/150/7134/6327/7139/6869/3741/9499/7273/85366/134/4842/124093/127294/1311/7135/5348/1146/60675/10021/10324/1160/59272/88/4703/7136/844/8…
GO:0043010	camera-type eye development	289	-0.552141	-1.27063	0.00226067	0.0321484	3333	tags=29%, list=18%, signal=24%	5914/50937/1295/2737/6469/5159/2916/24147/6662/6935/2048/43/10083/23554/5629/1414/7042/4810/652/7483/7111/7482/362/10818/7070/3624/9172/57010/775/2202/4211/2200/51384/2047/8842/5158/2697/5156/10002/1746/3208/1735/30812/1956/57030/7399/658/388585/1296/7475/10586/56853/5764/3549/10265/84465/6496/5979/7476/146862/6101/7101/121643/4693/8736/6121/1641/84189/4915/7054/3975/2625/11081/5076/4916/793/1543…
GO:0051937	catecholamine transport	59	-0.693109	-1.5377	0.00226712	0.032151	3324	tags=61%, list=18%, signal=50%	152/151/6571/135/5071/6531/83849/8973/84258/127833/3351/1812/3356/6387/90019/1815/23208/91683/150/3745/6857/1268/1394/225689/6530/57586/6623/64805/1813/5021/143425/1141/1113/7432/6580/183
GO:0007548	sex differentiation	238	-0.574167	-1.32211	0.00237277	0.0334644	2671	tags=25%, list=15%, signal=22%	4920/3020/7042/653/367/7482/3624/54361/2626/269/6586/58524/2661/2697/5156/3172/6092/23414/1588/30812/1299/2620/130497/658/23639/56159/1602/10388/6423/5806/116/117154/5798/642658/2069/1761/10265/1271/89766/5087/80000/7476/56956/7080/5972/2254/2099/3952/6770/4036/3975/2625/1586/283/2255/5241/117/7490/174/5950
GO:0046683	response to organophosphorus	127	-0.617655	-1.40366	0.00237277	0.0334644	3243	tags=35%, list=18%, signal=29%	6781/6382/6678/22953/7010/1277/5029/6531/3709/445/3767/7222/1393/2819/5743/3784/374/358/3488/50506/6263/6528/1080/10021/5798/6547/1645/64805/218/5972/5179/6770/5207/6532/5105/366/1036/1261/1373/1811/5313/7490/9370/189
GO:0006094	gluconeogenesis	74	-0.664822	-1.4959	0.0024475	0.0343298	1254	tags=19%, list=7%, signal=18%	2819/8789/2027/2645/3953/3952/145264/10993/4485/5207/5105/9370/229/5950
GO:0048880	sensory system development	336	-0.549411	-1.26503	0.0024475	0.0343298	3333	tags=29%, list=18%, signal=25%	5914/50937/596/6297/1295/2737/6469/5159/2916/24147/1289/27151/6662/6935/2048/43/10083/23554/4237/5629/64093/1414/7042/4810/652/7483/7111/7482/362/10818/7070/3624/9172/57010/775/2202/4211/2200/51384/2047/1290/8842/5158/2697/5156/10002/1746/3208/1735/30812/1956/57030/7399/658/388585/1296/7475/10586/6657/56853/5764/3549/718/10265/170692/84465/6496/64805/5979/7476/146862/6101/7101/121643/4693/8736/61…
GO:0098869	cellular oxidant detoxification	87	-0.653408	-1.47319	0.00248487	0.0347589	2278	tags=22%, list=12%, signal=19%	348/5743/389434/5742/50506/6280/2878/3043/948/3039/4025/137902/2168/9104/2938/55937/4504/213/3240
GO:0006361	transcription initiation from RNA polymerase I promoter	35	0.528223	1.64766	0.002498	0.0348476	5759	tags=57%, list=31%, signal=39%	5435/2068/5434/9013/55011/5441/6598/2968/221830/25885/902/7343/9533/6597/2966/2071/9014/64425/2965/11176
GO:0003007	heart morphogenesis	237	-0.565159	-1.30183	0.0025596	0.0356102	4450	tags=43%, list=24%, signal=33%	7122/54345/7474/4091/6495/6474/94/3725/58495/4092/283284/8701/3491/5318/53834/7472/6911/2294/57216/55036/7168/1832/23768/655/9645/6899/57493/2303/8321/1901/2535/1942/5914/57057/6469/27250/2627/1289/3398/7010/2702/140706/6662/79633/6910/9241/5629/7042/652/653/7481/6261/9172/2263/2626/27063/9464/115701/6586/51384/23493/8928/8557/2697/55273/65009/8313/89780/6092/23414/64321/7134/2348/7139/2006/1301/…
GO:0071772	response to BMP	148	-0.599132	-1.367	0.00259697	0.0359353	3160	tags=35%, list=17%, signal=29%	27250/2627/1749/6662/23213/94031/9241/4920/652/392255/23090/653/494470/81792/168667/5654/5046/2626/2200/269/10468/2661/55273/199699/658/56963/388585/6424/6423/1311/8646/642658/222008/170261/6425/4838/140628/64102/4036/8200/375567/2625/6997/283375/50964/4487/2719/1280/6664/286204/164656/7021
GO:0071773	cellular response to BMP stimulus	148	-0.599132	-1.367	0.00259697	0.0359353	3160	tags=35%, list=17%, signal=29%	27250/2627/1749/6662/23213/94031/9241/4920/652/392255/23090/653/494470/81792/168667/5654/5046/2626/2200/269/10468/2661/55273/199699/658/56963/388585/6424/6423/1311/8646/642658/222008/170261/6425/4838/140628/64102/4036/8200/375567/2625/6997/283375/50964/4487/2719/1280/6664/286204/164656/7021
GO:0051298	centrosome duplication	66	0.408442	1.50958	0.0026297	0.03616	2430	tags=18%, list=13%, signal=16%	118611/1017/100653515/8850/25914/84446/284403/54461/22994/25886/5311/116840
GO:1903825	organic acid transmembrane transport	120	-0.610618	-1.38901	0.00263433	0.03616	1659	tags=21%, list=9%, signal=19%	57030/2348/6539/6534/6519/6542/162515/6511/11136/6512/3766/6507/83733/4036/56301/160728/10998/477/366/7069/55089/284111/6506/183/10991
GO:1905039	carboxylic acid transmembrane transport	120	-0.610618	-1.38901	0.00263433	0.03616	1659	tags=21%, list=9%, signal=19%	57030/2348/6539/6534/6519/6542/162515/6511/11136/6512/3766/6507/83733/4036/56301/160728/10998/477/366/7069/55089/284111/6506/183/10991
GO:0015844	monoamine transport	71	-0.671813	-1.50369	0.00266029	0.0364188	3324	tags=56%, list=18%, signal=46%	152/151/6571/135/5071/6531/83849/4129/8973/84258/127833/3351/1812/3356/6387/90019/1815/23208/91683/150/3745/4842/6857/1268/1394/6570/225689/6530/57586/6623/64805/1813/5021/143425/1141/1113/7432/6532/6580/183
GO:0019835	cytolysis	29	-0.752225	-1.57209	0.00268863	0.0366994	1633	tags=38%, list=9%, signal=35%	3853/57115/5196/114771/2822/5076/727/3929/733/729/2147
GO:0044321	response to leptin	21	-0.795689	-1.58835	0.00269508	0.0366994	1254	tags=29%, list=7%, signal=27%	2645/3953/3952/6770/2244/4504
GO:0097421	liver regeneration	30	-0.768142	-1.60574	0.00272968	0.0369915	1698	tags=23%, list=9%, signal=21%	1956/3549/57817/5967/9104/1361/7448
GO:0006270	DNA replication initiation	36	0.557376	1.74237	0.00273542	0.0369915	3341	tags=44%, list=18%, signal=36%	1017/5558/8318/4174/4998/990/81620/57418/5001/90381/997/4176/4172/222229/23594/4171
GO:0046324	regulation of glucose import	51	-0.694743	-1.52725	0.00273815	0.0369915	628	tags=14%, list=3%, signal=13%	3952/5319/2719/9965/55600/6506/9370
GO:0062014	negative regulation of small molecule metabolic process	84	-0.644445	-1.44768	0.00281122	0.037879	3085	tags=29%, list=17%, signal=24%	8644/3638/84649/114899/27122/5629/653/348/54361/3208/1268/2645/79849/3953/85300/145264/340895/4485/5207/9965/341/130013/9971/9370
GO:0030510	regulation of BMP signaling pathway	80	-0.66015	-1.48519	0.00288669	0.0387027	2855	tags=35%, list=16%, signal=30%	23213/94031/9241/652/23090/494470/168667/5654/5046/2626/2200/10468/199699/388585/6424/6423/8646/6425/4036/8200/375567/50964/4487/2719/6664/286204/164656/7021
GO:0055075	potassium ion homeostasis	26	-0.780328	-1.61174	0.00288743	0.0387027	1729	tags=42%, list=9%, signal=38%	3757/3741/478/479/3766/6557/477/480/525/482/7021
GO:0046653	tetrahydrofolate metabolic process	18	-0.806048	-1.57613	0.00290565	0.0388456	463	tags=17%, list=3%, signal=16%	10840/51268/10841
GO:0051310	metaphase plate congression	56	0.464038	1.65015	0.00293344	0.0391152	3643	tags=39%, list=20%, signal=32%	284071/8379/54984/11004/81620/55143/27183/3835/283489/113130/3833/891/150465/91782/4292/10615/81930/79998/1778/10403/3837/5119
GO:0003012	muscle system process	404	-0.532801	-1.22801	0.00297062	0.0395084	3324	tags=32%, list=18%, signal=27%	152/151/4621/6781/2852/57057/255743/2627/22953/2702/51738/6769/93649/776/7138/23213/246329/1909/26287/5592/6865/1906/3762/55959/1131/7111/4151/7222/148/9722/6261/9172/8082/1812/5999/1134/3356/775/80763/2626/6329/3572/5743/3784/6331/9464/3363/23493/8811/8557/2697/126393/4878/1136/3270/1907/3757/150/3488/7134/6327/7139/6869/3741/9499/221476/7273/85366/134/4842/124093/127294/1311/7135/58529/5348/114…
GO:0034764	positive regulation of transmembrane transport	185	-0.580159	-1.33148	0.00300799	0.0398259	2664	tags=26%, list=14%, signal=23%	3767/54209/5295/9368/7070/9722/1812/930/5243/187/3784/51083/1815/8811/9001/4878/57165/3757/387129/5649/4842/5348/27092/1080/88/718/2259/844/10345/54413/23630/23237/1908/3747/3736/3746/2719/342667/219527/9965/3359/55600/482/5174/9104/6506/183/9370/2147
GO:0051187	cofactor catabolic process	51	-0.69302	-1.52347	0.00301001	0.0398259	1627	tags=25%, list=9%, signal=23%	50506/2878/3043/3039/4025/137902/10840/554235/54658/8529/4504/3240/259
GO:0002228	natural killer cell mediated immunity	58	0.435407	1.59047	0.00303916	0.0401082	1883	tags=34%, list=10%, signal=31%	1130/5873/3805/3902/9437/3824/3002/56253/4068/57823/11151/8807/114836/259197/3133/100507436/22914/5272/203068/3134
GO:0001654	eye development	328	-0.552043	-1.27167	0.00308272	0.040475	3333	tags=30%, list=18%, signal=25%	5914/50937/596/6297/1295/2737/6469/5159/2916/24147/1289/27151/6662/6935/2048/43/10083/23554/4237/5629/64093/1414/7042/4810/652/7483/7111/7482/362/10818/7070/3624/9172/57010/775/2202/4211/2200/51384/2047/1290/8842/5158/2697/5156/10002/1746/3208/1735/30812/1956/57030/7399/658/388585/1296/7475/10586/6657/56853/5764/3549/10265/170692/84465/6496/5979/7476/146862/6101/7101/121643/4693/8736/6121/2254/16…
GO:0003018	vascular process in circulatory system	156	-0.597812	-1.36731	0.00308272	0.040475	3324	tags=36%, list=18%, signal=30%	152/151/2852/135/84879/7010/10266/2702/5029/1909/5592/6865/1906/552/1131/148/3351/1812/91807/348/3356/5743/3363/2697/4878/1907/150/1956/3741/8862/4880/3043/134/4842/1621/1311/40/4881/116/59272/185/5021/3952/1113/1908/7432/477/566/6532/1373/2266/4922/183/2244/5345/2243
GO:0003407	neural retina development	59	-0.684654	-1.51894	0.00310536	0.0406682	2926	tags=42%, list=16%, signal=36%	6662/10083/23554/7042/7070/57010/8842/1746/1735/30812/57030/5764/3549/10265/84465/6496/6101/121643/6121/4915/3975/793/1826/2823/7021
GO:0060042	retina morphogenesis in camera-type eye	50	-0.695845	-1.52518	0.00311696	0.0407162	2926	tags=50%, list=16%, signal=42%	6096/50937/24147/6662/10083/23554/5629/7070/57010/8842/1735/30812/5764/3549/10265/84465/6101/121643/6121/4915/3975/793/1826/7021/5950
GO:0006353	DNA-templated transcription, termination	75	0.412271	1.50777	0.00315501	0.0410153	6684	tags=57%, list=36%, signal=37%	5435/29101/2068/5434/84967/9013/8189/25888/5441/2968/221830/54797/25885/5430/902/7343/9533/10419/10978/10898/2966/7270/51728/51692/2071/9014/4150/81608/64425/2965/6634/8458/7884/1478/6628/79101/23064/55339/1479/30834/6636/84172/29894
GO:0042274	ribosomal small subunit biogenesis	66	0.404344	1.49443	0.00316005	0.0410153	6662	tags=65%, list=36%, signal=42%	85395/27341/9277/705/57647/51065/115939/64963/6209/6838/102724159/65095/91695/55720/84916/57050/27340/8602/88745/28987/6223/6193/10607/6234/10436/6218/9790/55813/5822/64965/79954/90121/3921/4869/6204/23212/29777/64434/6202/51077/55127/51081/26284
GO:0010803	regulation of tumor necrosis factor-mediated signaling pathway	56	-0.681802	-1.51002	0.00316537	0.0410153	142	tags=14%, list=1%, signal=14%	7124/5071/83643/2621/260434/9971/9370/335
GO:0006067	ethanol metabolic process	18	-0.802331	-1.56886	0.00317181	0.0410153	2648	tags=61%, list=14%, signal=52%	222/6817/27284/6799/27233/6783/126/131/130/125/127
GO:1900076	regulation of cellular response to insulin stimulus	70	-0.660051	-1.47688	0.00318156	0.0410381	2122	tags=20%, list=12%, signal=18%	340706/1154/2888/4023/375704/2822/2660/493829/3952/145264/3481/183/9971/197
GO:0046782	regulation of viral transcription	64	0.41302	1.50678	0.00323471	0.0415276	3672	tags=36%, list=20%, signal=29%	5435/51176/8091/6351/6348/6352/51763/55223/3249/5434/29969/6895/9150/5441/6598/5987/23076/2962/6829/5702/25920/7936/22954
GO:0055081	anion homeostasis	51	-0.690448	-1.51781	0.00324304	0.0415276	1479	tags=41%, list=8%, signal=38%	142680/6558/5167/84649/6559/9368/2264/348/3172/6424/134/771/6557/51085/525/1373/27329/9971/5009/7021/335
GO:0070586	cell-cell adhesion involved in gastrulation	11	-0.874194	-1.60937	0.00324379	0.0415276	60	tags=36%, list=0%, signal=36%	3557/3586/9370/335
GO:0051047	positive regulation of secretion	386	-0.541738	-1.24879	0.00326955	0.0417154	3429	tags=29%, list=19%, signal=24%	23586/28984/4828/783/55107/7124/7447/6382/2696/2852/8600/22925/135/8938/57126/51738/4923/64127/5029/114899/22861/55638/776/177/43/54843/57393/6865/640/1906/54209/7042/552/9173/3624/55540/94121/120892/27063/6387/51083/112755/90865/2697/3651/4878/222546/1588/4602/2752/8941/1956/358/10631/4023/3745/114900/8862/654346/7273/3814/134/6857/1268/2645/1080/1394/79679/6343/4881/116/2822/6279/3552/6288/2302…
GO:0003091	renal water homeostasis	32	-0.744714	-1.56483	0.00327471	0.0417154	251	tags=22%, list=1%, signal=22%	359/358/8529/525/361/1579/7021
GO:0034080	CENP-A containing nucleosome assembly	39	0.500741	1.67862	0.00332975	0.0421566	3662	tags=44%, list=20%, signal=35%	8367/8365/55839/121504/79019/8294/8370/8360/201254/79172/55355/80152/4678/8363/57082/1058/8607
GO:0061641	CENP-A containing chromatin organization	39	0.500741	1.67862	0.00332975	0.0421566	3662	tags=44%, list=20%, signal=35%	8367/8365/55839/121504/79019/8294/8370/8360/201254/79172/55355/80152/4678/8363/57082/1058/8607
GO:0019226	transmission of nerve impulse	59	-0.682931	-1.51512	0.00333397	0.0421566	3004	tags=44%, list=16%, signal=37%	2852/51738/6326/2859/552/1812/1134/6329/6331/23114/58524/59283/4897/11280/27092/3751/4915/6323/4099/6328/149461/54112/3736/4916/7143/183
GO:0050673	epithelial cell proliferation	368	-0.538572	-1.24069	0.00334428	0.042183	3610	tags=30%, list=20%, signal=25%	677/1750/51804/2683/5155/5080/3082/2252/28984/7421/7124/2277/1295/6469/8600/441478/79805/6678/3398/83481/7010/3373/1749/2247/51738/64127/10344/6662/23213/9241/5629/3664/2810/7042/2191/652/55959/653/367/10818/3487/348/168667/2263/5654/187/6387/1232/6331/8456/219736/51384/2697/7057/374/64081/89780/2064/2752/1956/7060/3488/130497/8862/388585/7857/1296/6423/8549/9982/6657/116844/11202/5764/5798/3549/…
GO:0070374	positive regulation of ERK1 and ERK2 cascade	185	-0.578626	-1.32796	0.00338165	0.0425498	3295	tags=32%, list=18%, signal=27%	7124/799/2852/6361/255743/5159/8600/7010/2247/64127/10344/338557/177/388121/54209/652/148/2264/2261/2621/348/168667/3356/2263/2626/80310/389658/9464/8817/57007/6364/2056/5156/65009/1956/7066/5320/948/246/116/27202/6359/6278/54550/4838/1813/2322/2066/285016/6369/1116/6370/9965/2255/2266/55532/2244/5345/4504/2243
GO:0008306	associative learning	70	-0.658013	-1.47232	0.00341018	0.0428039	2344	tags=29%, list=13%, signal=25%	1812/7832/5153/65009/164312/50944/5649/1621/4885/1394/2558/54413/1813/2903/1141/6863/6616/477/7143/183
GO:0048565	digestive tract development	127	-0.613529	-1.39428	0.00341901	0.0428101	3295	tags=40%, list=18%, signal=33%	7124/596/79827/2737/6469/2627/3398/3576/445/93649/79633/7042/652/1281/5125/7481/2263/2626/579/2049/3651/5156/1956/91461/64321/10736/6423/2304/6343/5919/60529/3549/4821/6425/4838/5979/140628/5967/5021/887/2254/1045/123872/51208/1543/5697/6664/2255/1373/429/5009
GO:0048871	multicellular organismal homeostasis	442	-0.528474	-1.21873	0.00345638	0.0431727	3832	tags=30%, list=21%, signal=24%	5284/111/124590/272/947/7099/143689/56034/406/239/10874/64641/2303/1901/196883/5334/1734/53832/3480/760/338773/284266/7124/596/1364/26027/8600/9079/51087/4858/4117/51738/4923/64127/6337/11096/338557/6662/2103/43/26154/10083/4237/53833/283455/2810/66002/9658/23090/4982/1812/59344/6340/5745/3356/5743/8842/2697/1258/30061/64081/359/2312/64072/6338/1907/2104/92211/1956/358/1149/79191/50486/7399/8862/…
GO:0035249	synaptic transmission, glutamatergic	80	-0.65573	-1.47524	0.00352817	0.0439624	2354	tags=44%, list=13%, signal=38%	3351/1812/53358/120892/3356/5743/2894/254263/59283/2917/2752/1956/57030/50944/1006/5649/134/6857/1268/27092/116/23025/2901/54413/1813/2897/5021/2914/2918/2900/2899/477/9378/7143/2891
GO:0050857	positive regulation of antigen receptor-mediated signaling pathway	22	0.611144	1.74566	0.00356329	0.0440349	5955	tags=73%, list=32%, signal=49%	26228/3932/100/5579/3783/9840/10666/975/57181/5788/150372/123920/25865/8934/5970/50852
GO:0043266	regulation of potassium ion transport	89	-0.62558	-1.4093	0.0035659	0.0440349	2977	tags=40%, list=16%, signal=34%	57628/776/80333/54209/9722/1812/2273/3788/5999/3356/3784/51083/8811/4878/3757/150/283518/3741/134/4842/2645/116/88/845/1813/23630/1908/7432/3747/3736/3746/30820/23704/219527/482/1804
GO:0034115	negative regulation of heterotypic cell-cell adhesion	10	-0.877428	-1.58213	0.0035683	0.0440349	60	tags=40%, list=0%, signal=40%	3557/3586/9370/335
GO:0070587	regulation of cell-cell adhesion involved in gastrulation	10	-0.877428	-1.58213	0.0035683	0.0440349	60	tags=40%, list=0%, signal=40%	3557/3586/9370/335
GO:0043090	amino acid import	25	-0.77337	-1.58645	0.003604	0.0442853	1659	tags=48%, list=9%, signal=44%	6505/4923/5999/57030/6542/6511/3766/6507/477/6529/6506/183
GO:0006836	neurotransmitter transport	243	-0.567043	-1.30569	0.00360584	0.0442853	3247	tags=37%, list=18%, signal=31%	6571/2852/8600/135/8938/92745/5071/112476/6505/4923/6531/6536/26059/776/4129/8973/9256/116443/6865/1906/55879/127833/10815/148/3351/1812/9381/5999/815/120892/3356/81539/112755/9627/90019/1815/4878/23208/2571/1136/9379/8448/91683/1644/8825/2752/358/57030/6539/6534/8862/3043/8499/4842/6857/1268/6853/22895/6854/10675/116/6570/23025/6540/6530/2901/2555/6623/1813/114088/7476/6511/6512/3766/6507/143425…
GO:1903146	regulation of autophagy of mitochondrion	41	0.505519	1.70285	0.00370936	0.0453232	4342	tags=46%, list=24%, signal=35%	10645/25793/2629/706/54543/23400/10193/79594/11315/664/11140/6721/27429/57103/9927/1459/65018/2017/3064
GO:0036376	sodium ion export across plasma membrane	12	-0.856962	-1.58443	0.00371629	0.0453232	1410	tags=58%, list=8%, signal=54%	478/5348/479/486/477/480/482
GO:0007200	phospholipase C-activating G protein-coupled receptor signaling pathway	82	-0.650911	-1.4629	0.00371684	0.0453232	2662	tags=39%, list=14%, signal=34%	1906/2859/9368/2846/148/1812/5745/3356/2151/8811/2840/150/6869/3814/1394/88/27202/185/64805/1813/5733/2922/887/2099/56923/1113/1524/7432/2925/796/183/2147
GO:0042255	ribosome assembly	59	0.424506	1.53333	0.00373972	0.0454683	4825	tags=44%, list=26%, signal=33%	27341/56342/51116/54475/22907/51154/55052/51065/6122/84769/64963/6209/29997/23246/102724159/6135/91695/55794/6152/708/130916/6223/6193/65003/6234/4839
GO:0043462	regulation of ATPase activity	77	-0.659509	-1.48471	0.0037531	0.0454683	1654	tags=12%, list=9%, signal=11%	7134/7139/4057/4634/7140/2255/482/9104/229
GO:1990748	cellular detoxification	97	-0.636833	-1.44122	0.00375531	0.0454683	2293	tags=35%, list=12%, signal=31%	27244/6649/655/2877/7173/3040/9429/7124/4353/7837/2947/125336/2944/348/5743/389434/5742/50506/6280/2878/3043/948/57016/3039/4025/137902/2168/9104/127/2938/55937/4504/213/3240
GO:0000154	rRNA modification	35	0.515118	1.60678	0.00377331	0.0455788	5441	tags=60%, list=30%, signal=42%	345630/55178/55695/260294/115939/55505/27079/79066/117246/79922/54433/130916/51106/51504/114049/10436/29960/4839/2091/155400/55651
GO:0018196	peptidyl-asparagine modification	34	-0.7396	-1.56938	0.00380942	0.0458163	1167	tags=9%, list=6%, signal=8%	124872/432/433
GO:0006048	UDP-N-acetylglucosamine biosynthetic process	11	0.771003	1.86595	0.00381082	0.0458163	487	tags=27%, list=3%, signal=27%	5973/51005/91373
GO:0071887	leukocyte apoptotic process	98	0.368605	1.42266	0.00383486	0.0459976	1620	tags=23%, list=9%, signal=22%	79444/171558/384/3620/5027/5293/3707/939/1514/5133/356/6352/8013/100/6366/5585/917/3958/9212/581/2207/26155/695
GO:0048511	rhythmic process	265	-0.558221	-1.28425	0.00386777	0.0461766	2058	tags=17%, list=11%, signal=15%	6586/3363/1815/2661/5156/3172/6092/1644/1956/3036/2620/658/4316/4843/3814/3131/134/60675/5806/5764/5798/2660/2069/6496/92369/1813/7166/3751/7080/5021/6121/7079/1141/2099/3952/6770/4915/7054/8431/4916/6532/5241/9370/174/2155
GO:0070371	ERK1 and ERK2 cascade	277	-0.550047	-1.26606	0.00386777	0.0461766	3295	tags=28%, list=18%, signal=23%	7124/799/2852/6361/255743/5159/8600/7010/2247/64127/10344/57447/338557/6662/2048/177/388121/54209/652/9368/171389/10818/148/2264/2261/55885/2621/348/168667/3356/2263/2626/80310/389658/9464/8817/57007/6364/2047/2056/5156/65009/2064/1956/7066/5320/948/338761/246/78986/116/6098/27202/6359/6278/54550/4838/1813/8000/2322/5021/2066/55584/285016/6369/1116/152110/6370/9965/2255/2266/55532/183/2244/5345/4…
GO:0090208	positive regulation of triglyceride metabolic process	16	-0.813079	-1.55389	0.00393275	0.046792	1142	tags=25%, list=6%, signal=23%	2822/13/9104/344
GO:0006370	7-methylguanosine mRNA capping	33	0.525101	1.66786	0.00393755	0.046792	5924	tags=55%, list=32%, signal=37%	5435/2068/5434/5441/2962/6829/2968/8731/5430/902/23070/8732/2966/2071/5436/2965/2963/5433
GO:0010874	regulation of cholesterol efflux	23	-0.776497	-1.56891	0.00400693	0.0473096	60	tags=26%, list=0%, signal=26%	6469/26154/348/9370/5444/335
GO:0090184	positive regulation of kidney development	38	-0.720712	-1.53804	0.00401429	0.0473096	3710	tags=55%, list=20%, signal=44%	7849/51804/5155/6469/5159/6662/9241/652/7482/54361/80310/8842/30812/8710/5979/3975/2625/5076/183/7490/9370
GO:0006575	cellular modified amino acid metabolic process	176	-0.5776	-1.32649	0.00401797	0.0473096	2024	tags=19%, list=11%, signal=17%	57571/27284/389434/1735/2348/50506/5320/27306/7038/55350/6528/2304/8424/1160/123745/283748/8876/405753/1158/5319/64600/2625/10840/9027/29958/2628/635/23743/2939/1800/2938/51268/1733/10841
GO:0072080	nephron tubule development	88	-0.63513	-1.43191	0.00401797	0.0473096	3290	tags=40%, list=18%, signal=33%	596/2737/6469/255743/2247/6662/79633/9241/26249/652/7482/7481/54361/153572/8842/30812/79191/130497/388585/10736/7475/170690/5087/80000/2246/3975/2625/79192/5455/5076/793/2719/183/7490/7021
GO:0052803	imidazole-containing compound metabolic process	10	-0.87302	-1.57418	0.00403712	0.0474263	297	tags=70%, list=2%, signal=69%	3176/3067/57571/3034/144193/10841/7200
GO:0050432	catecholamine secretion	46	-0.700082	-1.52369	0.00405941	0.0475793	3324	tags=63%, list=18%, signal=52%	152/151/135/5071/83849/8973/84258/127833/3351/3356/6387/90019/23208/91683/150/3745/6857/1268/1394/57586/6623/64805/1813/5021/143425/1141/1113/7432/183
GO:0030947	regulation of vascular endothelial growth factor receptor signaling pathway	31	-0.747646	-1.56608	0.00408424	0.0477558	672	tags=16%, list=4%, signal=16%	2254/64102/2255/4504/7448
GO:0060041	retina development in camera-type eye	136	-0.607994	-1.38622	0.00409307	0.0477558	3569	tags=35%, list=19%, signal=29%	9742/5080/6096/22899/50937/5159/2916/24147/6662/43/10083/23554/5629/7042/7070/57010/8842/5158/5156/10002/1746/3208/1735/30812/57030/7399/658/56853/5764/3549/10265/84465/6496/5979/6101/7101/121643/4693/6121/1641/4915/3975/5076/793/1826/2823/7021/5950
GO:0008652	cellular amino acid biosynthetic process	78	-0.638439	-1.43756	0.0041334	0.0481169	1179	tags=15%, list=6%, signal=14%	374569/27165/2875/6507/635/1036/23743/1373/5009/5053/189/51733
GO:0050433	regulation of catecholamine secretion	44	-0.70633	-1.53031	0.00429507	0.0498858	3324	tags=66%, list=18%, signal=54%	152/151/135/5071/83849/8973/84258/127833/3351/3356/6387/90019/23208/91683/150/3745/6857/1268/1394/57586/6623/64805/1813/5021/143425/1141/1113/7432/183
GO:0006814	sodium ion transport	195	-0.577646	-1.32867	0.00431837	0.0499165	2355	tags=30%, list=13%, signal=26%	389015/6340/259232/81539/6329/1272/6331/6523/1815/154215/57419/345274/6338/6543/57030/6327/130497/6550/53828/11280/115584/201780/478/284525/4842/53826/5348/40/479/6528/53822/10021/9498/200010/128414/55800/6547/79570/29850/1813/486/57282/25769/6323/55515/160728/6557/6328/477/480/525/10050/482/55089/8647/284111/9058/10991
GO:0010811	positive regulation of cell-substrate adhesion	118	-0.59617	-1.35487	0.00431837	0.0499165	4197	tags=36%, list=23%, signal=28%	25890/2335/79625/8631/3491/4653/2294/4680/133584/55612/6385/10085/57580/2013/1295/255743/79812/7010/151887/2041/7070/2199/9806/1842/54361/25975/129080/64094/948/90187/246/10675/5764/5212/375567/6370/10562/2266/2244/2243/335/7448
GO:0030239	myofibril assembly	63	-0.665998	-1.48525	0.00432688	0.0499165	3252	tags=52%, list=18%, signal=43%	4621/3880/5159/84033/7138/5629/1906/7111/9172/91807/27063/8557/5156/7139/10529/10753/7273/127294/58529/10324/4892/88/4703/844/845/84665/56203/8736/4606/70/7140/79933/58
GO:1901616	organic hydroxy compound catabolic process	66	-0.673178	-1.4991	0.00436869	0.0502858	3246	tags=41%, list=18%, signal=34%	55809/8644/4923/6531/4129/10858/222/66002/348/6817/1591/27284/4051/6799/1735/9108/27124/57016/1621/27233/6783/1056/131/8529/127/1579/4504
GO:0034114	regulation of heterotypic cell-cell adhesion	25	-0.769693	-1.57891	0.00444787	0.0510827	159	tags=24%, list=1%, signal=24%	246/2266/2244/9370/2243/335
GO:0035265	organ growth	170	-0.580074	-1.33184	0.00446857	0.0510919	3664	tags=38%, list=20%, signal=31%	57493/693175/4086/2303/1901/2252/1303/5914/596/6781/7161/57057/6469/5159/2627/2247/140706/6662/85301/6910/9241/81578/5629/1293/1906/7042/367/148/2261/5999/8785/7373/2263/2626/4211/57502/340706/23493/2697/4878/65009/23414/1588/26011/768239/4880/9254/221476/51435/3776/1311/3953/4148/57817/5212/2254/2066/2099/3952/4322/6532/2255/183/7490/5950
GO:0098739	import across plasma membrane	110	-0.616183	-1.39811	0.00446857	0.0510919	3043	tags=35%, list=17%, signal=30%	6505/4923/51305/3772/6559/3767/285335/3762/389015/5999/7057/728215/3757/2348/6550/25800/478/284525/6542/479/10021/6547/6511/3766/3761/486/6507/4036/6557/283375/10998/477/3773/480/1261/482/6506/3760/183
GO:0007218	neuropeptide signaling pathway	63	-0.664729	-1.48242	0.00448004	0.0511092	2326	tags=70%, list=13%, signal=61%	57537/10800/10874/5443/56413/4828/2825/84634/4923/6753/6866/2847/2743/6751/51083/2831/8811/4878/11248/11251/387129/6755/64106/27344/9427/10888/1394/60675/339403/116/283869/6447/4888/2922/10886/5368/5179/56923/6863/6752/2925/8001/5697/4886
GO:0010248	establishment or maintenance of transmembrane electrochemical gradient	12	-0.849681	-1.57097	0.00451441	0.051387	1410	tags=58%, list=8%, signal=54%	478/479/486/477/480/6580/482
GO:0043200	response to amino acid	106	-0.615231	-1.39265	0.00454367	0.0516057	2994	tags=24%, list=16%, signal=20%	1277/445/6935/1906/1281/2743/1278/80310/9148/1290/3651/5156/3208/1956/158376/5764/4915/8001/5105/1036/1373/6750/6506/383/2155
GO:0018279	protein N-linked glycosylation via asparagine	33	-0.741532	-1.56752	0.00457772	0.0518776	1167	tags=9%, list=6%, signal=9%	124872/432/433
GO:0060193	positive regulation of lipase activity	66	-0.671705	-1.49582	0.00460065	0.0519985	3173	tags=38%, list=17%, signal=31%	5159/2247/6401/1909/552/148/2261/3356/2263/5156/3208/4908/1956/185/64805/2099/56923/4915/5319/283/4916/183/117/344/350
GO:0006937	regulation of muscle contraction	147	-0.591283	-1.34929	0.00461878	0.0519985	4004	tags=45%, list=22%, signal=35%	5318/5350/1490/487/18/7168/3759/1832/51196/10874/10203/152/151/6781/2852/255743/2702/51738/93649/7138/5592/6865/1906/1131/148/9722/775/80763/2626/6329/5743/3784/6331/126393/4878/1136/3270/1907/150/7134/7139/6869/85366/134/4842/7135/60675/10021/59272/7136/844/845/6547/9312/29119/4634/4625/7125/5021/56923/1113/6752/477/3736/7140/4608
GO:0044706	multi-multicellular organism process	194	-0.571295	-1.31375	0.00461878	0.0519985	3654	tags=36%, list=20%, signal=29%	406/2182/7043/780/2683/7421/285/5914/152/2013/151/596/1364/6781/1515/10266/51738/203447/6866/1906/3020/2706/5066/552/5125/367/1393/23641/54361/5743/3291/2697/2056/4878/10699/3488/8528/5744/4316/1268/1394/64518/116/5764/3549/8909/5016/4838/150921/5021/5368/5858/2099/3952/6863/7356/5618/43847/1833/1543/6532/1828/8614/5241/796/183/383/10991/259
GO:0001845	phagolysosome assembly	13	0.717068	1.80076	0.00465183	0.0522227	1625	tags=31%, list=9%, signal=28%	8406/5027/11151/4647
GO:0002431	Fc receptor mediated stimulatory signaling pathway	83	0.371443	1.42768	0.00465903	0.0522227	4296	tags=36%, list=23%, signal=28%	4651/5795/10095/919/8013/10458/7456/1445/917/7454/2207/644150/2889/10093/27342/5335/5291/3984/51517/2213/4641/5580/10666/2212/5594/25/5581/55845/3326/71
GO:0042157	lipoprotein metabolic process	121	-0.619785	-1.40949	0.00469388	0.0523845	628	tags=12%, list=3%, signal=12%	131540/2752/158866/2822/3952/242/57467/341/147111/29881/55937/4547/55908/338/335
GO:0048593	camera-type eye morphogenesis	109	-0.614968	-1.39508	0.00469388	0.0523845	3510	tags=39%, list=19%, signal=32%	5080/6096/50937/1295/2737/24147/6662/6935/2048/10083/23554/5629/652/7483/7482/362/10818/7070/57010/4211/51384/2047/8842/1735/30812/1296/5764/3549/10265/84465/6496/6101/121643/6121/4915/7054/3975/5076/793/6664/1826/7021/5950
GO:0036158	outer dynein arm assembly	15	-0.817297	-1.53276	0.00485852	0.0541044	1535	tags=53%, list=8%, signal=49%	55130/23639/115948/93233/51364/123872/27019/64446
GO:0071377	cellular response to glucagon stimulus	22	-0.768504	-1.54771	0.00487035	0.0541187	1444	tags=27%, list=8%, signal=25%	9340/2740/5105/1373/2642/383
GO:0042267	natural killer cell mediated cytotoxicity	54	0.433762	1.52946	0.00491226	0.0544256	1883	tags=35%, list=10%, signal=32%	1130/5873/3805/3902/9437/3002/56253/4068/57823/11151/8807/114836/259197/3133/100507436/22914/5272/203068/3134
GO:0090287	regulation of cellular response to growth factor stimulus	249	-0.557713	-1.28304	0.00491918	0.0544256	3073	tags=28%, list=17%, signal=23%	345193/255743/79812/2247/10251/93649/6935/27122/23213/94031/9241/3175/10563/652/55959/23090/1634/9719/494470/81792/168667/54361/5654/5046/2626/65997/2200/10468/8817/7057/64081/4908/387914/1149/2348/753/199699/8862/388585/64094/6424/6423/9982/8646/54829/116844/6425/124857/7080/2254/2246/64102/4036/8200/55816/375567/2625/4916/50964/4487/2719/6664/286204/2255/183/164656/4504/7021/7448
GO:0050434	positive regulation of viral transcription	41	0.495659	1.66964	0.00498275	0.0548006	4059	tags=37%, list=22%, signal=29%	5435/51176/3249/5434/29969/9150/5441/6598/23076/2962/6829/25920/7936/2959/5430
GO:0042180	cellular ketone metabolic process	220	-0.55968	-1.28823	0.00499428	0.0548006	922	tags=15%, list=5%, signal=14%	2264/10170/54361/2819/5743/169355/1646/1583/1588/57016/1268/85300/1645/6770/340895/1586/1555/6999/51085/9965/341/635/8529/2168/130013/9104/64577/127/9971/344/9370/1109/174
GO:0097756	negative regulation of blood vessel diameter	74	-0.652418	-1.46799	0.00499428	0.0548006	2662	tags=42%, list=14%, signal=36%	1909/1906/552/1131/148/3351/3356/5743/3363/2697/1907/150/1956/3741/8862/134/1621/1311/40/59272/185/5021/3952/1113/1908/477/6532/2266/183/2244/2243
GO:0044320	cellular response to leptin stimulus	17	-0.813539	-1.57838	0.00499577	0.0548006	1254	tags=29%, list=7%, signal=27%	2645/3953/3952/2244/4504
GO:0042159	lipoprotein catabolic process	15	-0.81596	-1.53026	0.0050472	0.0550728	204	tags=20%, list=1%, signal=20%	348/147111/338
GO:0006363	termination of RNA polymerase I transcription	31	0.549807	1.73792	0.00505483	0.0550728	5715	tags=55%, list=31%, signal=38%	5435/2068/5434/9013/5441/2968/221830/25885/902/7343/9533/2966/7270/2071/9014/64425/2965
GO:1903955	positive regulation of protein targeting to mitochondrion	31	0.550676	1.74066	0.00505483	0.0550728	4284	tags=48%, list=23%, signal=37%	89781/5880/54543/8314/58480/55823/6721/10055/27429/9776/1459/118424/10425/65018/7332
GO:0046349	amino sugar biosynthetic process	13	0.712411	1.78907	0.00506349	0.0550728	487	tags=23%, list=3%, signal=22%	5973/51005/91373
GO:0048678	response to axon injury	70	-0.649974	-1.45434	0.00509268	0.0552732	1892	tags=21%, list=10%, signal=19%	2056/2348/56963/4747/3776/11202/5764/64805/1813/4099/4916/7143/2596/383/335
GO:0001580	detection of chemical stimulus involved in sensory perception of bitter taste	14	-0.828071	-1.54515	0.00513785	0.0556003	1137	tags=36%, list=6%, signal=34%	1470/1469/4025/1472/5304
GO:0061326	renal tubule development	90	-0.635657	-1.43279	0.00514448	0.0556003	3290	tags=40%, list=18%, signal=33%	596/2737/6469/255743/2247/6662/79633/9241/26249/652/7482/7481/54361/153572/8842/30812/79191/130497/388585/10736/7475/170690/8549/5087/80000/2246/3975/2625/79192/5455/5076/793/2719/183/7490/7021
GO:0038094	Fc-gamma receptor signaling pathway	80	0.365342	1.36316	0.00521538	0.0559408	4296	tags=35%, list=23%, signal=27%	4651/26253/5795/10095/919/338339/10458/7456/917/7454/2207/644150/2889/10093/5335/5291/3984/51517/2213/4641/5580/2212/5594/25/5581/55845/3326/71
GO:0042743	hydrogen peroxide metabolic process	46	-0.691844	-1.50576	0.00521921	0.0559408	1734	tags=28%, list=9%, signal=26%	255027/1956/50506/2878/3043/3039/4025/137902/405753/1543/27035/4504/3240
GO:0060135	maternal process involved in female pregnancy	60	-0.664081	-1.47546	0.00521921	0.0559408	3399	tags=38%, list=18%, signal=31%	7421/285/6781/1515/51738/2706/5066/367/23641/54361/5743/2697/4316/1268/5764/3549/4838/150921/2099/1828/8614/5241/383
GO:0030073	insulin secretion	190	-0.568327	-1.30518	0.00521958	0.0559408	3324	tags=32%, list=18%, signal=26%	152/55107/26251/7124/7447/2696/2852/8938/5071/51738/3709/55638/776/3170/6927/57393/640/3767/10815/94121/775/51083/2697/3651/773/222546/3172/2752/150/6755/3745/3741/375704/9254/4843/387597/1268/2645/1080/2740/116/389692/2822/5798/131177/1813/143425/3952/1113/777/6833/6616/3747/8431/4826/169026/9971/7021/7200/5950
GO:0002923	regulation of humoral immune response mediated by circulating immunoglobulin	11	-0.859449	-1.58223	0.00524513	0.0559886	183	tags=36%, list=1%, signal=36%	2302/722/725/3263
GO:0051965	positive regulation of synapse assembly	58	-0.657538	-1.4572	0.00524585	0.0559886	2540	tags=43%, list=14%, signal=37%	347902/57633/5789/2049/2047/576/27286/575/94030/79953/40/26045/54413/7476/577/5021/84189/4915/147381/4916/54674/9378/347730/22865/64084
GO:0009635	response to herbicide	13	-0.84575	-1.57792	0.00526363	0.0560618	1522	tags=38%, list=8%, signal=35%	4747/6770/7054/1543/383
GO:0072009	nephron epithelium development	103	-0.624671	-1.41211	0.00529468	0.0562153	3984	tags=46%, list=22%, signal=36%	9863/9788/3911/947/7849/2303/51804/5420/596/2737/6469/255743/2247/6662/79633/9241/26249/652/7482/7481/54361/153572/8842/2302/4868/30812/79191/130497/388585/10736/7475/170690/5800/5087/80000/2246/3975/2625/79192/5455/5076/793/2719/183/7490/9370/7021
GO:0019229	regulation of vasoconstriction	54	-0.673902	-1.4879	0.00532243	0.0562153	2662	tags=44%, list=14%, signal=38%	1906/552/1131/148/3356/5743/2697/1907/150/1956/3741/8862/1621/40/59272/185/5021/3952/1908/477/2266/183/2244/2243
GO:0072347	response to anesthetic	64	-0.653331	-1.45402	0.00532243	0.0562153	2402	tags=28%, list=13%, signal=25%	1393/3351/1812/5999/3356/1815/3208/1268/27092/1394/1813/5021/1141/5179/6863/3359/6529/2155
GO:1900449	regulation of glutamate receptor signaling pathway	57	-0.678432	-1.50553	0.00532243	0.0562153	2040	tags=32%, list=11%, signal=28%	2904/254263/59283/50944/4747/5649/27092/88/23025/54550/54413/2903/146395/23237/2892/2893/2890/2891
GO:0015813	L-glutamate transmembrane transport	21	-0.773763	-1.54458	0.00533279	0.0562153	1659	tags=38%, list=9%, signal=35%	57030/6511/6512/3766/6507/83733/477/6506
GO:0048485	sympathetic nervous system development	19	-0.781543	-1.53755	0.00534908	0.0562714	1486	tags=42%, list=8%, signal=39%	9464/2676/91584/3642/2625/6664/429/7021
GO:0045940	positive regulation of steroid metabolic process	21	-0.772905	-1.54287	0.00550075	0.0577487	1066	tags=38%, list=6%, signal=36%	348/54361/185/2246/6770/341/183/335
GO:1905819	negative regulation of chromosome separation	37	0.486512	1.57258	0.00558378	0.0582624	3822	tags=38%, list=21%, signal=30%	8379/10459/9232/9212/81620/472/891/84861/701/991/699/10403/5347/25906
GO:2000816	negative regulation of mitotic sister chromatid separation	37	0.486512	1.57258	0.00558378	0.0582624	3822	tags=38%, list=21%, signal=30%	8379/10459/9232/9212/81620/472/891/84861/701/991/699/10403/5347/25906
GO:0030323	respiratory tube development	169	-0.581956	-1.33548	0.00559508	0.0582624	4168	tags=38%, list=23%, signal=30%	9496/9509/2324/2260/4015/64399/7472/1490/2294/57216/3911/55036/57493/7043/9394/2252/9231/7124/2737/6469/5159/2627/6678/93649/6662/6910/9241/5251/26154/1050/5629/10630/652/5125/7482/7481/9719/9620/2263/8817/5156/2302/1907/23414/1956/3488/91461/5764/4838/10247/7080/6441/2254/2246/123872/1116/2719/6664/3290/2255/5241/441376/429/383/5950
GO:0048592	eye morphogenesis	137	-0.605866	-1.38182	0.00559508	0.0582624	3315	tags=36%, list=18%, signal=30%	50937/596/1295/2737/24147/1289/6662/6935/2048/10083/23554/4237/5629/652/7483/7482/362/10818/7070/57010/2202/4211/2200/51384/2047/1290/8842/10002/1735/30812/1296/5764/3549/10265/84465/6496/6101/121643/6121/4915/7054/3975/5076/85407/793/6664/1826/23418/7021/5950
GO:1902750	negative regulation of cell cycle G2/M phase transition	98	0.360045	1.38962	0.00563134	0.0585213	5727	tags=55%, list=31%, signal=38%	8091/5698/63967/54984/4998/990/9212/60672/5699/84446/5695/27183/5721/472/5694/90381/80279/641/5714/5715/5719/29997/672/5685/5347/5702/5708/5691/5692/6790/5696/9344/29086/5705/5693/10197/5690/1111/9978/51347/29980/51514/8555/5720/5709/5717/5686/51343/91603/9577/9861/5713/60561/11073
GO:0098742	cell-cell adhesion via plasma-membrane adhesion molecules	256	-0.551307	-1.26739	0.00574528	0.0595848	4456	tags=47%, list=24%, signal=36%	3557/7122/3684/56122/1952/5175/137970/56127/5097/2196/8641/56146/3586/56106/9746/81607/56100/22997/869/1830/53834/8763/4680/57526/90952/56099/56132/24146/56134/56102/1003/5101/147409/84962/1364/56101/23022/51294/84966/1825/8404/57126/6401/56131/7412/79633/1005/56129/1365/7042/347902/57453/5789/49861/9620/57549/2239/1048/56147/54510/56103/152330/27253/9708/84623/1009/9071/64072/6092/92211/26011/53…
GO:0006692	prostanoid metabolic process	39	-0.707939	-1.50943	0.00582039	0.0601069	2662	tags=33%, list=14%, signal=29%	1906/552/8824/9536/5743/5742/1646/1907/27306/11283/525/2938/1109
GO:0006693	prostaglandin metabolic process	39	-0.707939	-1.50943	0.00582039	0.0601069	2662	tags=33%, list=14%, signal=29%	1906/552/8824/9536/5743/5742/1646/1907/27306/11283/525/2938/1109
GO:0008211	glucocorticoid metabolic process	20	-0.789135	-1.5757	0.00583075	0.0601069	2464	tags=55%, list=13%, signal=48%	653/54361/51083/3291/1583/1589/6770/1586/3290/335/866
GO:0007080	mitotic metaphase plate congression	44	0.473355	1.58153	0.00587754	0.0604444	3643	tags=39%, list=20%, signal=31%	8379/54984/11004/81620/55143/27183/3835/283489/113130/3833/891/91782/81930/79998/10403/3837/5119
GO:0072001	renal system development	282	-0.546893	-1.25866	0.00589548	0.0604444	3984	tags=38%, list=22%, signal=30%	9863/56603/9788/1028/2294/57216/3911/51301/4854/947/7849/655/51196/6385/2028/4086/2303/51804/9742/342372/5155/3691/5420/285/760/5914/9231/596/2737/6382/7161/4774/6469/255743/5159/3398/5017/7010/2247/445/84662/93649/6662/79633/23213/9241/5629/26249/7042/652/168002/55959/5125/7482/7481/1634/168667/1592/120892/54361/2263/2200/80310/153572/84623/8842/5156/359/2302/6092/4868/30812/64321/79191/130497/3…
GO:0030212	hyaluronan metabolic process	37	-0.7168	-1.52567	0.00589882	0.0604444	239	tags=32%, list=1%, signal=32%	5155/3082/10057/3373/2247/80760/10894/3036/3700/3699/3698/3697
GO:1900024	regulation of substrate adhesion-dependent cell spreading	52	-0.694428	-1.5308	0.00591509	0.0604905	304	tags=13%, list=2%, signal=13%	10631/10675/10562/2266/2244/2243/335
GO:0050807	regulation of synapse organization	202	-0.559761	-1.28893	0.00604569	0.0617031	2618	tags=36%, list=14%, signal=31%	23768/3706/8321/51804/25791/1942/22899/7162/9231/7124/26052/6678/51738/6405/2048/4776/80725/347902/57633/5063/5789/9423/57549/2239/348/120892/2049/2904/9148/2047/5913/7846/89780/6092/4897/576/27286/575/1006/6585/5649/94030/79953/5100/40/11202/57497/5764/5800/26045/54413/1813/7476/1496/577/5021/84189/79012/1141/1607/23237/4915/147381/375323/4916/54674/9378/347730/22865/64084/2596/2823
GO:0001881	receptor recycling	34	0.522827	1.65078	0.00610186	0.0621528	536	tags=15%, list=3%, signal=14%	6622/27065/125058/22876/11149
GO:0010828	positive regulation of glucose transmembrane transport	37	-0.715767	-1.52347	0.00614632	0.0623657	1006	tags=16%, list=5%, signal=15%	718/2719/9965/55600/6506/9370
GO:0050829	defense response to Gram-negative bacterium	49	-0.690413	-1.51198	0.00614705	0.0623657	2814	tags=41%, list=15%, signal=35%	3593/149233/58985/6372/671/5544/646627/1672/575/4843/5919/4057/6278/84659/1755/2220/1113/566/3929/2147
GO:0009452	7-methylguanosine RNA capping	34	0.522472	1.64966	0.00621591	0.062816	5924	tags=53%, list=32%, signal=36%	5435/2068/5434/5441/2962/6829/2968/8731/5430/902/23070/8732/2966/2071/5436/2965/2963/5433
GO:0036260	RNA capping	34	0.522472	1.64966	0.00621591	0.062816	5924	tags=53%, list=32%, signal=36%	5435/2068/5434/5441/2962/6829/2968/8731/5430/902/23070/8732/2966/2071/5436/2965/2963/5433
GO:0006336	DNA replication-independent nucleosome assembly	49	0.428031	1.46467	0.00625073	0.0630437	3664	tags=39%, list=20%, signal=31%	8367/8365/55839/121504/79019/8294/8370/8360/201254/79172/55355/80152/7290/4678/8363/57082/1058/8607/23523
GO:0001676	long-chain fatty acid metabolic process	101	-0.618785	-1.40013	0.00634609	0.06388	2611	tags=30%, list=14%, signal=26%	5066/66002/9536/59344/5743/28965/4051/11001/5742/27306/23205/246/1562/23305/1564/1572/242/1555/10998/219970/1543/8529/1576/2938/1565/1571/1579/1559/1558/1548
GO:0006362	transcription elongation from RNA polymerase I promoter	30	0.535449	1.70048	0.00643779	0.0646273	5219	tags=50%, list=28%, signal=36%	5435/5457/2068/5434/9013/5441/2968/221830/25885/902/7343/9533/2966/2071/9014
GO:0046545	development of primary female sexual characteristics	92	-0.632948	-1.42826	0.00649629	0.0646273	2405	tags=29%, list=13%, signal=26%	3624/54361/269/6586/2661/5156/6092/23414/1588/1299/2620/658/1602/5806/116/117154/5798/2069/89766/56956/2099/3952/283/5241/117/7490/174
GO:0055067	monovalent inorganic cation homeostasis	142	-0.587731	-1.34093	0.00649629	0.0646273	2723	tags=30%, list=15%, signal=25%	6559/1906/285335/66002/552/389015/6340/120892/80763/64699/6338/10699/3757/6550/3741/478/284525/134/479/1080/4881/9498/185/534/1813/3766/887/57282/6863/6557/477/480/7274/51458/8529/525/482/1811/27035/183/1579/7021
GO:1901661	quinone metabolic process	32	-0.72845	-1.53065	0.00649999	0.0646273	1793	tags=19%, list=10%, signal=17%	1646/57016/1645/8529/127/1109
GO:0030325	adrenal gland development	22	-0.761424	-1.53345	0.00650813	0.0646273	2440	tags=41%, list=13%, signal=36%	7481/54361/5156/1394/5087/3642/429/7490/335
GO:0017001	antibiotic catabolic process	48	-0.681848	-1.48574	0.00653366	0.0646273	1943	tags=35%, list=11%, signal=32%	27284/6799/50506/2878/3043/57016/3039/27233/4025/137902/6783/131/54658/5105/127/4504/3240
GO:0071384	cellular response to corticosteroid stimulus	55	-0.675165	-1.49251	0.00653366	0.0646273	3663	tags=38%, list=20%, signal=31%	5106/677/6781/2852/8644/445/6753/1906/2706/1956/358/6755/116/2660/2322/11170/6770/6752/54658/5105/383
GO:0034370	triglyceride-rich lipoprotein particle remodeling	10	-0.860695	-1.55195	0.00654366	0.0646273	310	tags=60%, list=2%, signal=59%	348/4023/3990/344/338/335
GO:0046185	aldehyde catabolic process	10	-0.859971	-1.55065	0.00654366	0.0646273	126	tags=30%, list=1%, signal=30%	112817/127/189
GO:0045745	positive regulation of G protein-coupled receptor signaling pathway	25	-0.759928	-1.55888	0.00656584	0.0646273	1768	tags=48%, list=10%, signal=43%	11251/4842/5653/718/54550/1813/2922/1113/43847/6900/25818/2147
GO:0030324	lung development	165	-0.582601	-1.33481	0.00657139	0.0646273	4229	tags=39%, list=23%, signal=30%	9496/9509/2324/2260/4015/64399/7472/1490/2294/57216/3911/55036/57493/7043/9394/2252/9231/7124/2737/6469/5159/2627/6678/93649/6662/6910/9241/5251/26154/1050/5629/10630/652/7482/7481/9719/9620/2263/8817/5156/2302/1907/23414/1956/3488/91461/5764/4838/10247/7080/6441/2254/2246/123872/1116/2719/6664/3290/2255/5241/441376/429/383/5950
GO:1901652	response to peptide	466	-0.522955	-1.2071	0.00657139	0.0646273	3096	tags=20%, list=17%, signal=17%	5167/6678/7010/51738/64127/1277/445/22861/7412/177/5251/1906/54209/2706/5295/2690/2798/1393/23641/11031/815/6387/9365/2200/5743/51083/340706/54328/7832/3291/1395/2697/374/773/4878/1154/2888/1583/3645/3488/4023/4747/375704/948/7253/9340/478/84709/2645/1394/2740/5919/2822/5798/88/2660/2069/185/89766/534/493829/5967/5021/6121/7079/3795/3952/6770/5319/145264/7054/5618/7031/4322/5207/5105/525/1036/861…
GO:0006584	catecholamine metabolic process	45	-0.683394	-1.48531	0.00662429	0.0648989	3077	tags=56%, list=17%, signal=46%	5071/6531/4129/285671/7042/3067/1812/6817/9627/9464/5153/1815/6799/1644/6620/1621/4881/1813/2903/1141/3642/7054/2625/5409/5053
GO:0009712	catechol-containing compound metabolic process	45	-0.683394	-1.48531	0.00662429	0.0648989	3077	tags=56%, list=17%, signal=46%	5071/6531/4129/285671/7042/3067/1812/6817/9627/9464/5153/1815/6799/1644/6620/1621/4881/1813/2903/1141/3642/7054/2625/5409/5053
GO:0032890	regulation of organic acid transport	51	-0.670789	-1.4746	0.00667424	0.0652637	1940	tags=41%, list=11%, signal=37%	8600/22925/135/4923/1906/552/5999/7057/2917/130497/134/59272/3952/477/8529/6529/183/1579/383/7200/10991
GO:0070286	axonemal dynein complex assembly	28	-0.750663	-1.55815	0.00670865	0.0652783	2878	tags=57%, list=16%, signal=48%	56171/55130/126820/7802/85478/23639/115948/93233/27285/51364/387885/92749/123872/27019/348807/64446
GO:0072073	kidney epithelium development	133	-0.594747	-1.35483	0.00672159	0.0652783	4401	tags=49%, list=24%, signal=37%	5175/4091/6495/3237/4092/3579/2260/9863/9788/3911/947/7849/655/6385/4086/2303/51804/5420/5914/596/2737/6382/6469/255743/2247/6662/79633/9241/26249/652/7482/7481/168667/54361/2263/153572/8842/2302/6092/4868/30812/79191/130497/388585/10736/7475/170690/5800/5087/5979/80000/9244/2246/3975/2625/79192/5455/5076/6492/793/2719/183/7490/9370/7021
GO:0035646	endosome to melanosome transport	10	0.770804	1.85569	0.0067592	0.0652783	3426	tags=70%, list=19%, signal=57%	23682/967/10981/8943/8907/388552/26258
GO:0043485	endosome to pigment granule transport	10	0.770804	1.85569	0.0067592	0.0652783	3426	tags=70%, list=19%, signal=57%	23682/967/10981/8943/8907/388552/26258
GO:0048757	pigment granule maturation	10	0.770804	1.85569	0.0067592	0.0652783	3426	tags=70%, list=19%, signal=57%	23682/967/10981/8943/8907/388552/26258
GO:0089718	amino acid import across plasma membrane	22	-0.758832	-1.52823	0.00676673	0.0652783	1359	tags=45%, list=7%, signal=42%	6505/4923/5999/6542/6511/3766/6507/477/6506/183
GO:0019319	hexose biosynthetic process	77	-0.644943	-1.45192	0.00677746	0.0652783	1254	tags=18%, list=7%, signal=17%	2819/8789/2027/2645/3953/3952/145264/10993/4485/5207/5105/9370/229/5950
GO:0042310	vasoconstriction	70	-0.642489	-1.43759	0.00677746	0.0652783	2819	tags=41%, list=15%, signal=35%	1909/1906/552/1131/148/3351/3356/5743/3363/2697/1907/150/1956/3741/8862/1621/1311/40/59272/185/5021/3952/1908/477/6532/2266/183/2244/2243
GO:0006879	cellular iron ion homeostasis	56	-0.663948	-1.47048	0.00683036	0.0656646	1880	tags=16%, list=10%, signal=14%	30061/9843/79901/4057/57817/164656/7036/7018/3263
GO:0046323	glucose import	58	-0.65094	-1.44257	0.00685404	0.0657691	628	tags=12%, list=3%, signal=12%	3952/5319/2719/9965/55600/6506/9370
GO:0050667	homocysteine metabolic process	14	-0.817317	-1.52509	0.00686737	0.0657741	259	tags=29%, list=1%, signal=28%	1491/635/1373/1800
GO:0060457	negative regulation of digestive system process	16	-0.797753	-1.5246	0.00689918	0.0659557	1207	tags=50%, list=7%, signal=47%	5731/6343/7032/57817/5733/5021/64240/64241
GO:0015802	basic amino acid transport	15	-0.809298	-1.51776	0.00693396	0.0661283	1490	tags=33%, list=8%, signal=31%	6519/6542/183/383/10991
GO:0051306	mitotic sister chromatid separation	58	0.412504	1.50681	0.006943	0.0661283	4104	tags=34%, list=22%, signal=27%	8379/29781/10459/990/9232/9212/81620/472/891/10460/9787/84861/701/991/51433/699/10403/5347/25906/5518
GO:0060541	respiratory system development	189	-0.564371	-1.29519	0.007022	0.0667569	4168	tags=37%, list=23%, signal=29%	9509/2324/2260/4015/64399/53834/7472/1490/2294/57216/3911/55036/57493/51804/7043/9394/2252/5914/9231/7124/2737/6469/5159/2627/6678/1749/445/93649/6662/6910/9241/5251/26154/1050/5629/10630/652/7482/7481/9719/9620/2263/8817/5156/2302/1907/23414/1956/3488/91461/54768/5764/4838/10247/7080/6441/2254/2246/123872/1116/2719/6664/3290/2255/5241/441376/429/7490/383/5950
GO:0060192	negative regulation of lipase activity	16	-0.797351	-1.52383	0.00708194	0.0672023	267	tags=50%, list=1%, signal=49%	9734/693175/728113/22925/653145/341/27329/335
GO:0042147	retrograde transport, endosome to Golgi	86	0.3697	1.39059	0.00716684	0.0678825	5503	tags=51%, list=30%, signal=36%	29886/150786/51560/374403/26088/55275/54551/10652/57533/1174/150368/9905/5987/1639/55111/8218/7813/22836/9341/63893/7879/8729/100287171/9043/6811/8677/112936/200576/51272/387680/80148/51542/7260/9570/79735/83874/10139/738/25963/10490/6642/64145/8934/25938
GO:0050996	positive regulation of lipid catabolic process	20	-0.780954	-1.55936	0.00723361	0.0683887	1366	tags=30%, list=7%, signal=28%	134/6343/13/2168/27329/344
GO:0006833	water transport	16	-0.796556	-1.52231	0.00726469	0.0685563	2439	tags=56%, list=13%, signal=49%	362/359/364/358/363/1080/79849/366/361
GO:0043268	positive regulation of potassium ion transport	43	-0.692451	-1.49257	0.00737678	0.0694362	2624	tags=44%, list=14%, signal=38%	54209/9722/1812/2273/3784/51083/8811/4878/3757/150/134/88/23630/1908/3747/3736/3746/219527/482
GO:0034724	DNA replication-independent nucleosome organization	50	0.427844	1.50345	0.00738499	0.0694362	3664	tags=38%, list=20%, signal=31%	8367/8365/55839/121504/79019/8294/8370/8360/201254/79172/55355/80152/7290/4678/8363/57082/1058/8607/23523
GO:0048738	cardiac muscle tissue development	196	-0.561737	-1.29207	0.0075477	0.0708364	4172	tags=42%, list=23%, signal=33%	4092/2260/283284/57538/5318/5350/7472/57158/7168/1832/655/57493/693175/4086/2303/1901/26585/5914/7161/57057/5159/2627/3398/2247/2702/140706/93649/6910/9241/5629/1906/7042/652/653/10818/148/9172/91807/5999/2263/2626/27063/4211/115701/23493/8928/8557/2697/4878/5156/65009/89780/23414/26011/84700/7134/7139/10529/1301/221476/3084/7273/3776/85366/127294/7135/4892/88/4703/57817/140628/4634/4625/6445/873…
GO:0035094	response to nicotine	43	-0.691697	-1.49094	0.00761096	0.0712063	3885	tags=56%, list=21%, signal=44%	1139/18/3775/84152/7124/596/6531/7412/8973/3767/1906/1134/116372/3651/1136/1268/1146/1813/1141/5179/6770/7054/477/4487
GO:0030879	mammary gland development	134	-0.594771	-1.35558	0.0076228	0.0712063	3586	tags=32%, list=20%, signal=26%	7043/780/540/9914/7421/7473/2737/8600/3398/3219/6531/6662/1999/3664/5066/652/367/9423/54361/2263/9148/2697/374/89780/1588/3488/8862/3084/2001/7166/5021/2066/2099/2625/6997/5618/4485/4487/2255/1036/5241/383/462
GO:0035902	response to immobilization stress	22	-0.754517	-1.51954	0.00762872	0.0712063	1237	tags=41%, list=7%, signal=38%	3176/51083/1394/7166/5967/5972/7054/7031/1543
GO:0097340	inhibition of cysteine-type endopeptidase activity	10	0.764721	1.84105	0.0078349	0.0728658	2668	tags=50%, list=15%, signal=43%	79444/8530/330/114769/8996
GO:0097341	zymogen inhibition	10	0.764721	1.84105	0.0078349	0.0728658	2668	tags=50%, list=15%, signal=43%	79444/8530/330/114769/8996
GO:0032479	regulation of type I interferon production	120	0.332975	1.19901	0.00785906	0.0729583	4305	tags=31%, list=23%, signal=24%	5435/140885/10622/4321/3428/661/51311/54941/5300/5434/3659/63906/171568/5802/1499/84166/6772/56919/10293/4791/7353/5441/10211/51428/64771/2547/26191/22954/197358/58509/79132/8767/55666/8887/79102/79671/54476
GO:0050803	regulation of synapse structure or activity	209	-0.560903	-1.29235	0.00807563	0.0744332	3592	tags=35%, list=20%, signal=28%	8321/51804/25791/1942/22899/7162/9231/7124/26052/6678/51738/6405/55638/2048/4776/80725/347902/57633/5063/5789/9423/57549/2239/348/120892/112755/2049/2904/9148/2047/5913/7846/89780/6092/4897/57030/576/27286/575/1006/6585/5649/94030/79953/5100/40/11202/57497/5764/5800/26045/54413/1813/7476/1496/577/5021/84189/79012/1141/1607/23237/4915/147381/375323/4916/54674/9378/347730/22865/64084/2596/2823
GO:0090092	regulation of transmembrane receptor protein serine/threonine kinase signaling pathway	216	-0.558309	-1.28666	0.00807563	0.0744332	4403	tags=42%, list=24%, signal=32%	7474/4091/10140/94/114990/91/6498/58495/4092/6653/63976/151449/3491/4015/9863/1028/80139/9315/655/55612/4052/8321/7043/1003/26585/57057/6469/255743/93649/6935/27122/23213/94031/9241/3175/7042/652/2662/168002/392255/23090/653/9719/494470/3624/168667/5654/5046/2626/65997/2200/10468/2661/7057/64081/1149/2348/753/199699/388585/6424/6423/8646/54829/651/116844/2660/1761/7044/6425/4838/124857/7080/3547/…
GO:0015807	L-amino acid transport	57	-0.670336	-1.48757	0.00808084	0.0744332	1659	tags=26%, list=9%, signal=24%	57030/6519/6542/6511/11136/6512/3766/6507/83733/56301/477/6506/183/383/10991
GO:0072017	distal tubule development	11	-0.850631	-1.56599	0.00808821	0.0744332	489	tags=45%, list=3%, signal=44%	26249/5455/5076/793/7021
GO:0050913	sensory perception of bitter taste	17	-0.800025	-1.55216	0.00809043	0.0744332	1137	tags=29%, list=6%, signal=28%	1470/1469/4025/1472/5304
GO:0034433	steroid esterification	12	-0.830737	-1.53594	0.00817108	0.074773	1066	tags=50%, list=6%, signal=47%	348/185/8435/341/183/335
GO:0034434	sterol esterification	12	-0.830737	-1.53594	0.00817108	0.074773	1066	tags=50%, list=6%, signal=47%	348/185/8435/341/183/335
GO:0034435	cholesterol esterification	12	-0.830737	-1.53594	0.00817108	0.074773	1066	tags=50%, list=6%, signal=47%	348/185/8435/341/183/335
GO:0010965	regulation of mitotic sister chromatid separation	55	0.409479	1.42823	0.00818563	0.074773	3822	tags=33%, list=21%, signal=26%	8379/10459/990/9232/9212/81620/472/891/10460/9787/84861/701/991/51433/699/10403/5347/25906
GO:0010518	positive regulation of phospholipase activity	57	-0.670095	-1.48703	0.00823475	0.0750881	3173	tags=42%, list=17%, signal=35%	5159/2247/6401/1909/552/148/2261/3356/2263/5156/3208/4908/1956/185/64805/2099/56923/4915/5319/283/4916/183/117/344
GO:0010043	response to zinc ion	46	-0.678067	-1.47578	0.00831431	0.0756792	1136	tags=24%, list=6%, signal=22%	6279/57817/3861/23498/3795/7054/1373/169026/5009/4504/383
GO:0006071	glycerol metabolic process	18	-0.770839	-1.50728	0.00833645	0.0757464	628	tags=33%, list=3%, signal=32%	84649/80168/3952/346606/5105/27329
GO:0048875	chemical homeostasis within a tissue	13	-0.836276	-1.56025	0.0083716	0.0757502	710	tags=38%, list=4%, signal=37%	26154/6441/729238/653509/9476
GO:0001501	skeletal system development	475	-0.518611	-1.1978	0.00837751	0.0757502	4511	tags=40%, list=25%, signal=31%	144347/3202/5307/4146/2114/25946/55512/23508/7474/6495/6474/94/1298/5079/9496/4325/6886/5396/55870/4041/54360/2260/51478/5364/3491/4015/64399/53834/4653/56603/1490/1028/655/56034/6899/4086/2303/1750/51804/7043/9742/3218/1303/7421/26585/5914/338773/284266/10683/8538/3714/6781/2737/6469/8600/6678/3638/3199/7010/3373/1749/2247/2702/51738/1277/60484/3219/6662/56243/6935/79633/85301/23213/3212/9241/81…
GO:0032835	glomerulus development	59	-0.659626	-1.46341	0.00838867	0.0757502	3984	tags=56%, list=22%, signal=44%	9863/9788/57216/4854/947/655/51196/2028/2303/5155/5420/285/596/5159/7010/23213/9241/652/55959/80310/84623/8842/5156/2302/4868/130497/8710/5800/5979/3975/5076/7490/9370
GO:0070125	mitochondrial translational elongation	88	0.361715	1.34175	0.00839589	0.0757502	6662	tags=57%, list=36%, signal=36%	64975/54998/51116/65080/51253/116541/55052/90480/122704/64976/64432/6150/6182/124995/64963/28973/63875/10573/64960/64969/55168/7284/64951/65003/6183/78988/65993/84545/54948/118487/51642/116540/64965/51264/51258/64981/23107/51650/51069/29074/26589/51023/5018/54148/64968/65008/54534/51649/51081/26284
GO:0033683	nucleotide-excision repair, DNA incision	39	0.467239	1.56631	0.00843298	0.0759513	5949	tags=54%, list=32%, signal=36%	2068/5425/5424/57804/2067/6117/7311/2968/7314/1643/1642/9557/4968/9978/5983/2966/2071/6118/5984/2965/5982
GO:0007094	mitotic spindle assembly checkpoint	34	0.512733	1.61891	0.00849692	0.0759939	3822	tags=38%, list=21%, signal=30%	8379/10459/9212/81620/472/891/84861/701/991/699/10403/5347/25906
GO:0031577	spindle checkpoint	34	0.512733	1.61891	0.00849692	0.0759939	3822	tags=38%, list=21%, signal=30%	8379/10459/9212/81620/472/891/84861/701/991/699/10403/5347/25906
GO:0071173	spindle assembly checkpoint	34	0.512733	1.61891	0.00849692	0.0759939	3822	tags=38%, list=21%, signal=30%	8379/10459/9212/81620/472/891/84861/701/991/699/10403/5347/25906
GO:0071174	mitotic spindle checkpoint	34	0.512733	1.61891	0.00849692	0.0759939	3822	tags=38%, list=21%, signal=30%	8379/10459/9212/81620/472/891/84861/701/991/699/10403/5347/25906
GO:0070372	regulation of ERK1 and ERK2 cascade	262	-0.548117	-1.26057	0.00852845	0.0761433	3295	tags=29%, list=18%, signal=24%	7124/799/2852/6361/255743/5159/8600/7010/2247/64127/10344/57447/338557/2048/177/388121/54209/652/9368/171389/10818/148/2264/2261/55885/2621/348/168667/3356/2263/2626/80310/389658/9464/8817/57007/6364/2047/2056/5156/65009/2064/1956/7066/5320/948/338761/246/78986/116/6098/27202/6359/6278/54550/4838/1813/8000/2322/2066/55584/285016/6369/1116/152110/6370/9965/2255/2266/55532/2244/5345/4504/9370/2243
GO:0042537	benzene-containing compound metabolic process	25	-0.752387	-1.54341	0.00859911	0.0766409	1166	tags=44%, list=6%, signal=41%	2944/169355/5446/1580/23498/6770/7054/6999/54658/64577/1571
GO:0006957	complement activation, alternative pathway	10	-0.852932	-1.53796	0.0086376	0.0768504	1918	tags=50%, list=10%, signal=45%	629/718/3075/727/733
GO:0050731	positive regulation of peptidyl-tyrosine phosphorylation	171	-0.565784	-1.29847	0.0086794	0.0769556	2624	tags=25%, list=14%, signal=22%	54209/149233/80725/2690/148/2261/2621/3356/8784/285489/3572/389658/1272/9148/8995/374/2056/1440/89780/4908/150/7060/388585/948/3084/5649/134/2069/9244/2322/2066/285016/255324/3952/4915/6997/2255/50604/3481/183/9370/3263/7448
GO:2001257	regulation of cation channel activity	159	-0.583461	-1.33469	0.0086794	0.0769556	3003	tags=32%, list=16%, signal=27%	4923/6769/2048/246329/3767/2859/54209/1393/9722/6236/3788/51083/2904/1815/8811/254263/9001/2056/4878/59283/3270/3208/283518/50944/57338/4747/5649/4842/27092/1394/88/2259/844/845/10345/54413/1813/2903/23630/146395/23237/3747/3736/3746/23704/342667/219527/2892/2893/2890/2891
GO:0070126	mitochondrial translational termination	89	0.36638	1.35314	0.00871269	0.0771176	6662	tags=57%, list=36%, signal=37%	64975/54998/51116/65080/51253/116541/55052/90480/122704/64976/64432/6150/6182/124995/64963/28973/63875/10573/64960/64969/55168/64951/65003/6183/78988/65993/84545/54948/118487/54516/51642/116540/64965/51264/51258/64981/23107/51650/51069/29074/26589/51023/5018/84340/54148/64968/65008/54534/51649/51081/26284
GO:0003071	renal system process involved in regulation of systemic arterial blood pressure	23	-0.755629	-1.52675	0.00879169	0.0776829	2560	tags=61%, list=14%, signal=52%	66002/5125/56670/2621/3291/2697/134/5800/185/5972/8529/183/1579/5345
GO:0032606	type I interferon production	122	0.333897	1.21357	0.00889751	0.0784828	4305	tags=31%, list=23%, signal=24%	5435/140885/10622/4321/3428/661/51311/54941/5300/5434/3659/63906/171568/5802/1499/84166/6772/56919/10293/4791/7353/5441/10211/51428/64771/2547/26191/22954/197358/58509/79132/8767/55666/64343/8887/79102/79671/54476
GO:0036297	interstrand cross-link repair	51	0.425355	1.48879	0.00891803	0.0785289	5376	tags=47%, list=29%, signal=33%	353497/5888/201254/199990/2175/2177/2067/146956/6117/7311/2187/91442/7314/84464/55215/84515/2189/64858/378708/80198/55159/6118/80233/375748
GO:0060761	negative regulation of response to cytokine stimulus	61	-0.656394	-1.46178	0.00894857	0.0785938	443	tags=10%, list=2%, signal=10%	26525/260434/9971/9370/383/335
GO:1903319	positive regulation of protein maturation	23	-0.754715	-1.5249	0.00895601	0.0785938	1346	tags=30%, list=7%, signal=28%	85409/10418/6900/2161/3818/55908/7036
GO:0031638	zymogen activation	49	-0.680387	-1.49002	0.00909133	0.0796451	775	tags=18%, list=4%, signal=18%	2903/2161/3818/2266/2244/5345/1361/2243/350
GO:0046626	regulation of insulin receptor signaling pathway	62	-0.656587	-1.4614	0.00915825	0.0800947	2122	tags=19%, list=12%, signal=17%	340706/1154/2888/375704/2660/493829/3952/145264/3481/183/9971/197
GO:0034329	cell junction assembly	387	-0.527868	-1.21671	0.00928317	0.081049	4421	tags=38%, list=24%, signal=29%	56122/7474/5175/6495/3728/56127/94/3673/4867/4035/387804/9746/151306/3909/2335/4092/3551/27445/5364/869/5318/928/9863/4653/139065/80139/3911/3852/3918/90952/100506658/23768/153562/10207/6385/57493/56132/3914/143098/50848/8321/51804/266977/3691/1003/7162/84962/9231/7124/596/26052/2318/7010/10266/2702/51738/56131/79983/2701/1005/2048/43/84612/119/1365/2706/861/8927/347902/57633/7481/7070/53942/1431…
GO:0070723	response to cholesterol	25	-0.749204	-1.53688	0.00945048	0.0821082	1142	tags=16%, list=6%, signal=15%	3624/2822/23209/2155
GO:0031507	heterochromatin assembly	54	0.412578	1.45477	0.00947006	0.0821082	2228	tags=24%, list=12%, signal=21%	8367/8365/8351/121504/8091/8294/8370/8360/8357/53615/8353/3159/51548
GO:0060068	vagina development	10	-0.850611	-1.53377	0.00947517	0.0821082	630	tags=40%, list=3%, signal=39%	2099/4036/3975/5950
GO:0000727	double-strand break repair via break-induced replication	11	0.734562	1.77775	0.00948013	0.0821082	4875	tags=91%, list=27%, signal=67%	8318/4174/8317/4176/4172/4171/51659/84296/80198/4175
GO:2001032	regulation of double-strand break repair via nonhomologous end joining	22	0.557681	1.59295	0.00948445	0.0821082	4073	tags=45%, list=22%, signal=35%	8091/10459/55135/158880/24144/10039/78996/79000/23347/55693
GO:0002791	regulation of peptide secretion	440	-0.518434	-1.19532	0.00958505	0.0828394	3973	tags=32%, list=22%, signal=25%	9734/3569/85480/11027/81793/18/7292/64109/111/947/7099/7849/55612/406/693175/10874/4345/7043/91543/11069/80223/23586/28984/7850/152/55107/26251/7124/7447/2696/2852/8600/135/8938/5071/2702/51738/64127/3709/114899/22861/55638/338557/776/177/2615/43/3170/54474/57393/8840/640/3767/54209/80725/5066/7042/9173/1393/55540/94121/2621/348/120892/775/27063/440068/1815/90865/2697/7100/3651/773/23208/222546/3…
GO:0001960	negative regulation of cytokine-mediated signaling pathway	57	-0.663298	-1.47195	0.00962	0.082869	443	tags=11%, list=2%, signal=10%	26525/260434/9971/9370/383/335
GO:0008209	androgen metabolic process	25	-0.748163	-1.53474	0.00962076	0.082869	2248	tags=36%, list=12%, signal=32%	10170/54361/1588/2099/8630/1586/7364/1576/1109
GO:0032094	response to food	29	-0.719183	-1.50303	0.00970032	0.0834143	1059	tags=31%, list=6%, signal=29%	80763/3291/389383/100507055/3952/340204/1543/1373/4504
GO:0030728	ovulation	20	-0.771909	-1.5413	0.00978063	0.0839643	2405	tags=40%, list=13%, signal=35%	3624/5743/7130/2620/2069/3952/5241/174
GO:0070227	lymphocyte apoptotic process	64	0.382209	1.39438	0.00986349	0.0845343	1620	tags=27%, list=9%, signal=24%	79444/171558/384/3620/5027/939/5133/356/6352/100/5585/917/3958/9212/581/26155/695
GO:0042769	DNA damage response, detection of DNA damage	38	0.468499	1.53555	0.00991968	0.0848742	6251	tags=58%, list=34%, signal=38%	8091/755/11284/5425/5424/57804/64963/6117/7311/7314/1642/4750/9978/51514/5983/6118/5984/64965/5982/56852/5981/7398
GO:0043583	ear development	198	-0.564231	-1.29838	0.0100379	0.0857426	4195	tags=47%, list=23%, signal=37%	5396/54360/2260/9497/84059/1027/115908/57216/3777/124590/9890/7849/6899/6385/1750/51804/7043/780/2535/26018/51168/596/3714/2737/6469/5159/6678/3638/3199/1749/6662/6935/79633/2103/2048/2637/9241/10083/1050/5629/125488/4920/1906/6939/2706/7042/652/9368/653/9620/9423/168667/10804/2263/579/53904/3784/219736/23493/8557/7545/259236/64072/89780/3208/2487/8825/2561/130497/1301/7399/388585/10736/145258/85…
GO:0046486	glycerolipid metabolic process	383	-0.526181	-1.21261	0.0101888	0.0867705	1712	tags=11%, list=9%, signal=10%	9108/285848/162466/4023/5320/27124/54979/5288/246/660/9362/133121/2822/718/123745/283748/117245/1607/346606/5319/145264/64600/392636/283/10998/2173/64850/3990/341/5105/7069/1373/13/2168/9104/1571/9971/344/5444/338/335/350
GO:0034383	low-density lipoprotein particle clearance	31	-0.726291	-1.52135	0.0101978	0.0867705	486	tags=16%, list=3%, signal=16%	948/8435/9971/9370/338
GO:0016137	glycoside metabolic process	19	-0.764081	-1.50319	0.0102089	0.0867705	1793	tags=32%, list=10%, signal=29%	1646/57016/1645/7054/57733/1109
GO:1903532	positive regulation of secretion by cell	366	-0.527531	-1.21529	0.0103398	0.0877373	3429	tags=28%, list=19%, signal=23%	23586/28984/4828/783/55107/7124/7447/6382/2696/2852/8600/135/8938/57126/51738/4923/64127/114899/22861/55638/776/177/43/57393/6865/640/1906/54209/7042/552/9173/3624/55540/94121/120892/27063/6387/51083/112755/90865/2697/3651/4878/222546/1588/4602/2752/8941/1956/10631/4023/3745/114900/8862/654346/7273/3814/6857/1268/2645/1080/1394/79679/6343/116/2822/3552/6288/23025/199713/284194/1813/2922/8736/5021…
GO:0000723	telomere maintenance	152	0.304815	1.24593	0.010378	0.0879161	4574	tags=32%, list=25%, signal=24%	8367/8365/5558/121504/8294/8370/8360/54984/2237/9212/5888/55135/65057/11284/5425/1499/472/5424/51548/3104/57804/2067/5371/55505/10574/641/26354/24144/5394/10039/80119/6117/8363/2547/54386/9401/9156/23381/10694/5594/54433/5889/9894/84464/3326/64858/50485/5426/51750
GO:0050690	regulation of defense response to virus by virus	30	0.512032	1.62611	0.0105687	0.0893009	2858	tags=30%, list=16%, signal=25%	8905/3932/919/926/1175/8907/162/1174/130340
GO:0043691	reverse cholesterol transport	13	-0.830219	-1.54894	0.0105792	0.0893009	310	tags=46%, list=2%, signal=45%	348/1191/3990/55937/344/335
GO:0006595	polyamine metabolic process	16	0.645528	1.77725	0.0106144	0.0893009	3530	tags=62%, list=19%, signal=51%	6611/196743/6723/51686/4953/112483/54498/83933/4946/1725
GO:0051897	positive regulation of protein kinase B signaling	152	-0.581025	-1.3266	0.0106417	0.0893009	3544	tags=36%, list=19%, signal=29%	5155/10268/3082/2252/3480/7124/799/5159/8600/8644/7010/642273/2247/388121/8822/57462/5295/10818/930/2264/2261/2621/2263/9365/219736/8817/7057/374/5156/1440/1646/2064/1956/3488/7066/3084/2069/64805/5979/2254/2066/2246/2099/255324/3952/2625/1524/1116/9965/2255/152831/3481/2159/2155
GO:1901653	cellular response to peptide	344	-0.52509	-1.20854	0.0106417	0.0893009	2662	tags=17%, list=14%, signal=15%	1906/54209/2706/5295/2690/2798/1393/23641/11031/815/9365/2200/340706/54328/1395/773/1154/2888/1583/3645/4023/375704/948/7253/9340/478/84709/2645/1394/2740/5919/2822/88/2660/185/89766/534/493829/5967/6121/3952/6770/5319/145264/5618/5105/525/1373/55532/5313/3481/183/2642/9971/9370/3484/383/197
GO:0046599	regulation of centriole replication	22	0.548461	1.56661	0.0106458	0.0893009	892	tags=14%, list=5%, signal=13%	118611/100653515/8850
GO:0010984	regulation of lipoprotein particle clearance	15	-0.801182	-1.50254	0.0107131	0.0896441	1142	tags=27%, list=6%, signal=25%	2822/341/9971/344
GO:0099150	regulation of postsynaptic specialization assembly	11	-0.841286	-1.54879	0.0107391	0.0896441	1070	tags=55%, list=6%, signal=51%	5789/26045/4916/9378/347730/2596
GO:0150052	regulation of postsynapse assembly	11	-0.841286	-1.54879	0.0107391	0.0896441	1070	tags=55%, list=6%, signal=51%	5789/26045/4916/9378/347730/2596
GO:0006596	polyamine biosynthetic process	13	0.674647	1.69423	0.0108389	0.0902874	1896	tags=46%, list=10%, signal=41%	6611/196743/6723/51686/4953/54498
GO:0010517	regulation of phospholipase activity	68	-0.636716	-1.42078	0.0108513	0.0902874	3173	tags=40%, list=17%, signal=33%	5159/22925/653145/2247/6401/1909/552/148/2261/3356/2263/5156/3208/4908/1956/185/64805/2099/56923/4915/5319/283/4916/27329/183/117/344
GO:0048806	genitalia development	41	-0.671688	-1.44234	0.0108915	0.0904749	2671	tags=32%, list=15%, signal=27%	4920/653/367/5156/1588/10388/80000/2099/4036/3975/2255/7490/5950
GO:0008217	regulation of blood pressure	159	-0.578356	-1.32301	0.0109435	0.0905726	3647	tags=43%, list=20%, signal=35%	2028/10874/5443/50848/5155/774/1511/2013/151/255061/3398/22953/10266/2702/4923/1909/3816/1906/66002/552/5125/367/148/56670/83988/2621/80763/1278/5743/3291/2697/4878/10699/5742/1907/10631/8862/3043/1215/170690/4843/134/4842/1268/40/4881/2740/5800/59272/185/1813/5021/5972/3952/1113/6863/1908/477/1066/8529/9283/27035/183/2642/1579/5345/9370/4886
GO:0032103	positive regulation of response to external stimulus	467	-0.518209	-1.19616	0.0109435	0.0905726	3173	tags=21%, list=17%, signal=17%	5159/8600/143662/27250/284467/2247/3576/51738/64127/10344/135250/177/3593/4582/1050/27190/1233/8840/1906/54209/10563/1235/9173/5063/55540/56670/9048/2621/120892/57402/154064/6387/3572/80310/5743/8817/90865/7057/4878/4908/1907/1956/7060/4023/5320/6280/64094/7857/347733/727897/4588/4584/1268/8740/84630/5919/5764/6279/2660/2069/185/4586/718/6278/9547/394263/94025/64805/5733/4583/5650/6863/6369/6283/…
GO:0030104	water homeostasis	66	-0.650324	-1.44821	0.0109562	0.0905726	2593	tags=33%, list=14%, signal=29%	6337/26154/2810/66002/59344/6340/359/2312/6338/358/1080/3868/6343/6344/242/3848/8529/366/525/361/1579/7021
GO:0006296	nucleotide-excision repair, DNA incision, 5'-to lesion	37	0.461159	1.49063	0.0109877	0.090687	5949	tags=54%, list=32%, signal=37%	2068/5425/5424/57804/2067/6117/7311/2968/7314/1643/1642/9557/9978/5983/2966/2071/6118/5984/2965/5982
GO:0000183	rDNA heterochromatin assembly	27	0.539102	1.64218	0.0110258	0.0907525	1837	tags=33%, list=10%, signal=30%	8367/8365/8351/121504/8294/8370/8360/8357/8353
GO:0006783	heme biosynthetic process	21	0.57545	1.63462	0.011031	0.0907525	4924	tags=57%, list=27%, signal=42%	2235/706/7389/3145/402055/1371/51629/211/1355/2395/4779/7390
GO:0033048	negative regulation of mitotic sister chromatid segregation	40	0.473123	1.59936	0.0110636	0.0908755	3822	tags=38%, list=21%, signal=30%	8379/10459/9232/9212/81620/472/891/84861/701/991/699/10403/5347/8260/25906
GO:0045738	negative regulation of DNA repair	33	0.485889	1.54331	0.0111023	0.0910476	4149	tags=30%, list=23%, signal=24%	8091/7291/10459/24144/10721/2187/78996/79000/23347/4968
GO:0002921	negative regulation of humoral immune response	12	-0.820721	-1.51742	0.0111838	0.0914233	1846	tags=33%, list=10%, signal=30%	2302/11005/722/725
GO:0006534	cysteine metabolic process	12	-0.821588	-1.51903	0.0111838	0.0914233	231	tags=33%, list=1%, signal=33%	1491/51380/1036/189
GO:0019985	translesion synthesis	41	0.466866	1.57265	0.0112195	0.0915694	5500	tags=54%, list=30%, signal=38%	10459/353497/199990/5425/5424/57804/124739/7353/6117/7311/7314/25898/55666/9768/51514/5980/5429/5983/9246/6118/9100/5984
GO:0071385	cellular response to glucocorticoid stimulus	52	-0.676594	-1.49148	0.011267	0.0918114	1698	tags=37%, list=9%, signal=33%	5106/677/6781/445/6753/1906/2706/1956/358/6755/116/2660/2322/11170/6770/6752/54658/5105/383
GO:0032891	negative regulation of organic acid transport	17	-0.788243	-1.5293	0.0114626	0.0931455	2268	tags=47%, list=12%, signal=41%	5999/7057/2917/130497/134/3952/8529/7200
GO:0072078	nephron tubule morphogenesis	70	-0.630492	-1.41075	0.011467	0.0931455	3290	tags=44%, list=18%, signal=36%	596/2737/6469/255743/2247/6662/79633/9241/26249/652/7482/7481/54361/153572/30812/79191/130497/388585/10736/7475/170690/5087/80000/2246/3975/2625/79192/5076/2719/183/7490
GO:0007565	female pregnancy	169	-0.569602	-1.30713	0.0115473	0.0935402	3399	tags=33%, list=18%, signal=27%	7421/285/5914/152/2013/151/596/1364/6781/1515/10266/51738/6866/3020/2706/5066/5125/367/1393/23641/54361/5743/3291/2697/2056/4878/10699/3488/5744/4316/1268/1394/116/5764/3549/8909/5016/4838/150921/5021/5368/5858/2099/3952/7356/5618/1833/1828/8614/5241/796/183/383/10991/259
GO:0048524	positive regulation of viral process	105	0.344325	1.34978	0.011552	0.0935402	4224	tags=30%, list=23%, signal=23%	5435/7113/51176/3956/6352/104/3482/3249/5434/29969/27183/10450/6895/9150/5479/972/5441/6598/23076/2962/79720/6829/7879/25920/7936/5886/2959/5430/1642/5034/1072
GO:0032232	negative regulation of actin filament bundle assembly	23	0.555752	1.63186	0.0115978	0.0937629	2726	tags=43%, list=15%, signal=37%	23671/395/4233/79822/7454/51763/10391/3925/10395/5216
GO:0030540	female genitalia development	17	-0.787553	-1.52796	0.0116403	0.0938985	630	tags=35%, list=3%, signal=34%	1588/2099/4036/3975/2255/5950
GO:0098754	detoxification	117	-0.607106	-1.37877	0.0116611	0.0938985	2293	tags=21%, list=12%, signal=19%	2944/348/4489/5743/389434/5742/50506/6280/2878/3043/948/57016/3039/5446/4025/137902/5174/2168/9104/127/2938/55937/4504/213/3240
GO:0032892	positive regulation of organic acid transport	30	-0.729901	-1.5258	0.0116901	0.0938985	251	tags=23%, list=1%, signal=23%	59272/8529/6529/183/1579/7200/10991
GO:0072507	divalent inorganic cation homeostasis	456	-0.51399	-1.18632	0.0116983	0.0938985	3577	tags=31%, list=19%, signal=26%	1901/55630/540/10268/54757/9651/9914/1003/7421/4828/783/596/799/7504/6781/255061/2696/2852/2843/8600/5732/5071/22953/2247/51738/4923/3709/776/1909/9256/1233/1906/2859/10563/1235/552/2846/7222/7070/7781/1903/148/6261/3351/1812/930/2847/348/57402/5745/3356/187/775/4489/6387/9365/5729/1232/5731/2151/2904/1815/57007/8811/5158/2697/84239/9001/1258/728215/2056/773/5156/57419/64072/3270/6543/2840/1907/1…
GO:0097164	ammonium ion metabolic process	20	-0.764017	-1.52554	0.0117191	0.0938985	2928	tags=55%, list=16%, signal=46%	3176/285671/3067/5153/1644/133121/7166/2903/29958/635/7200
GO:0043129	surfactant homeostasis	11	-0.838162	-1.54304	0.0117243	0.0938985	710	tags=45%, list=4%, signal=44%	26154/6441/729238/653509/9476
GO:2000106	regulation of leukocyte apoptotic process	78	0.378933	1.42367	0.0119155	0.0952814	1620	tags=26%, list=9%, signal=23%	79444/171558/384/3620/5027/5293/3707/939/5133/6352/8013/100/6366/917/3958/9212/581/2207/26155/695
GO:0050805	negative regulation of synaptic transmission	63	-0.642698	-1.43329	0.0120827	0.0964675	2354	tags=35%, list=13%, signal=31%	3351/1812/120892/3356/5743/57502/27253/23208/3745/134/56853/54413/1813/4137/23237/25769/2899/6532/7143/6529/2890/9370
GO:0098712	L-glutamate import across plasma membrane	13	-0.825905	-1.5409	0.0121913	0.0970976	785	tags=54%, list=4%, signal=52%	6505/4923/6511/3766/6507/477/6506
GO:0031103	axon regeneration	46	-0.666746	-1.45114	0.0121994	0.0970976	1652	tags=22%, list=9%, signal=20%	2348/56963/4747/11202/5764/4099/4916/7143/2596/335
GO:0031055	chromatin remodeling at centromere	43	0.431656	1.46156	0.0122476	0.0973302	3662	tags=40%, list=20%, signal=32%	8367/8365/55839/121504/79019/8294/8370/8360/201254/79172/55355/80152/4678/8363/57082/1058/8607
GO:0006297	nucleotide-excision repair, DNA gap filling	23	0.552905	1.6235	0.0123007	0.097601	6227	tags=65%, list=34%, signal=43%	5425/3978/5424/57804/3980/6117/7311/7314/5426/5983/6118/5984/5982/7515/5981
GO:0048712	negative regulation of astrocyte differentiation	12	-0.815097	-1.50703	0.0123928	0.0981799	1515	tags=58%, list=8%, signal=54%	9241/3400/388585/7101/4916/9283/2147
GO:0010470	regulation of gastrulation	36	-0.703702	-1.49958	0.0124329	0.098346	1986	tags=36%, list=11%, signal=32%	1290/89780/3172/26011/64321/130497/6423/642658/4838/3975/286204/9370/335
GO:0007099	centriole replication	36	0.498661	1.55883	0.0125431	0.0990652	1542	tags=17%, list=8%, signal=15%	118611/1017/100653515/8850/25914/284403
GO:0006284	base-excision repair	41	0.460934	1.55267	0.0125748	0.099088	3149	tags=29%, list=17%, signal=24%	8091/2237/252969/5428/3978/5424/4350/3159/51548/3980/10721/6117
GO:0051966	regulation of synaptic transmission, glutamatergic	61	-0.646072	-1.43879	0.0125913	0.099088	2354	tags=44%, list=13%, signal=39%	3351/1812/120892/3356/5743/59283/2917/2752/1956/50944/5649/134/6857/1268/27092/116/23025/54413/1813/2897/5021/2914/2918/2899/477/9378/7143
GO:0007389	pattern specification process	400	-0.521161	-1.20122	0.0126039	0.099088	4687	tags=42%, list=25%, signal=32%	161582/3215/5916/91355/6604/650/3214/1482/57619/3202/9935/2114/55764/3684/54345/1952/7474/4091/6495/3237/94/138162/648/91/58495/4041/2260/3955/8701/64399/79365/7472/56603/6911/2294/57216/389549/8553/55036/4222/7849/655/9645/53820/6899/4086/2303/9742/3087/3218/5080/26585/1947/50937/7473/10683/6781/2737/57057/6469/441478/3199/3219/6405/6935/6910/2637/3212/3170/9241/23314/3204/55130/4920/1906/6939/6…
GO:0070669	response to interleukin-2	13	0.666193	1.673	0.0126591	0.09937	2164	tags=38%, list=12%, signal=34%	4435/6776/3560/3718/3559
GO:0045912	negative regulation of carbohydrate metabolic process	45	-0.664429	-1.44409	0.0126983	0.0995256	1254	tags=24%, list=7%, signal=23%	5167/5071/114899/3170/2645/3953/145264/4485/5207/2646/9370
GO:0006941	striated muscle contraction	156	-0.577556	-1.32098	0.0127549	0.0998161	3014	tags=35%, list=16%, signal=30%	2702/6769/776/7138/246329/3762/4151/148/9722/1134/775/2626/6329/3784/6331/8557/2697/4878/3270/3757/7134/6327/7139/3741/7273/85366/134/4842/124093/7135/10021/10324/59272/7136/844/845/55800/6547/56203/29119/4634/4625/1837/7125/23630/23676/1113/70/6323/477/23704/7140/342667/4608/3760
GO:0006695	cholesterol biosynthetic process	64	-0.632052	-1.40667	0.0128523	0.100302	1247	tags=11%, list=7%, signal=10%	3158/1080/2246/1066/29881/338/335
GO:0007628	adult walking behavior	26	-0.733137	-1.51426	0.012856	0.100302	2344	tags=38%, list=13%, signal=34%	1812/2743/58524/7545/51286/1813/3766/6323/6900/7200
GO:0060993	kidney morphogenesis	90	-0.619544	-1.39647	0.0129058	0.100538	3903	tags=47%, list=21%, signal=37%	57216/3911/51301/7849/655/51804/596/2737/6469/255743/5159/2247/6662/79633/9241/26249/652/7482/7481/120892/54361/153572/2302/30812/79191/130497/388585/10736/7475/170690/5087/80000/2246/3975/2625/79192/5076/793/2719/2255/183/7490
GO:0000731	DNA synthesis involved in DNA repair	47	0.430647	1.4699	0.0130127	0.101147	5500	tags=49%, list=30%, signal=34%	10459/353497/199990/5425/5424/57804/124739/7353/6117/7311/7314/25898/55666/9768/5426/51514/5980/5429/5983/9246/6118/9100/5984
GO:0006120	mitochondrial electron transport, NADH to ubiquinone	53	0.399444	1.41122	0.0130235	0.101147	5150	tags=40%, list=28%, signal=29%	6622/374291/51079/11315/4728/126328/4722/4702/4713/4714/65018/4723/4731/4717/4729/4725/4700/4708/4716/54539/4695
GO:0030049	muscle filament sliding	32	-0.712615	-1.49738	0.0132285	0.10243	1965	tags=50%, list=11%, signal=45%	8557/7134/7139/7273/85366/7135/88/4703/7136/4634/4625/7125/4606/70/7140/58
GO:0033275	actin-myosin filament sliding	32	-0.712615	-1.49738	0.0132285	0.10243	1965	tags=50%, list=11%, signal=45%	8557/7134/7139/7273/85366/7135/88/4703/7136/4634/4625/7125/4606/70/7140/58
GO:0009301	snRNA transcription	71	0.357833	1.34644	0.0132588	0.10251	4059	tags=27%, list=22%, signal=21%	5435/6618/5434/26173/55756/55174/6884/80789/5441/54973/6621/2962/5452/22936/6878/51593/2959/129685/5430
GO:0050886	endocrine process	76	-0.628498	-1.41292	0.0133586	0.103126	3014	tags=41%, list=16%, signal=34%	2702/51738/114899/6865/1906/552/5125/3624/1393/56670/51083/3291/2661/10699/1907/8862/1215/3814/1394/59272/185/5021/5972/3952/6863/1908/2625/1066/27035/183/5345
GO:0018216	peptidyl-arginine methylation	14	-0.798023	-1.48909	0.0133936	0.103241	669	tags=14%, list=4%, signal=14%	56341/9971
GO:0060368	regulation of Fc receptor mediated stimulatory signaling pathway	12	0.685972	1.6811	0.0134874	0.103808	4529	tags=50%, list=25%, signal=38%	5795/1445/2889/27342/10666/5788
GO:0006301	postreplication repair	51	0.409173	1.43215	0.0135859	0.10441	5500	tags=47%, list=30%, signal=33%	10459/353497/199990/197370/5425/5424/57804/124739/7353/6117/672/7311/7314/25898/55666/9768/51514/5980/5429/5983/9246/6118/9100/5984
GO:0010677	negative regulation of cellular carbohydrate metabolic process	39	-0.687599	-1.46606	0.0136345	0.104517	1254	tags=28%, list=7%, signal=26%	5167/5071/114899/3170/2645/3953/145264/4485/5207/2646/9370
GO:0046135	pyrimidine nucleoside catabolic process	20	-0.759102	-1.51573	0.0136575	0.104517	1629	tags=25%, list=9%, signal=23%	200315/10930/151531/1807/51733
GO:2000779	regulation of double-strand break repair	76	0.370349	1.3633	0.0136609	0.104517	4374	tags=37%, list=24%, signal=28%	56154/8091/7291/10459/55137/7454/2305/5888/55135/56907/158880/51548/5371/64210/24144/10039/10721/23028/54386/2187/78996/79000/23347/55693/4968/1111/131870/84250
GO:0034374	low-density lipoprotein particle remodeling	11	-0.832612	-1.53282	0.0136947	0.10462	1605	tags=64%, list=9%, signal=58%	348/5320/185/3990/4018/183/338
GO:0001754	eye photoreceptor cell differentiation	41	-0.663961	-1.42574	0.0137958	0.105042	2926	tags=44%, list=16%, signal=37%	5080/6096/6662/10083/7070/57010/8842/10002/1735/30812/5764/3549/6101/4915/7054/85407/1826/23418
GO:0009086	methionine biosynthetic process	12	-0.809166	-1.49606	0.0138033	0.105042	259	tags=25%, list=1%, signal=25%	4552/635/23743
GO:1905954	positive regulation of lipid localization	74	-0.63075	-1.41923	0.0138115	0.105042	3170	tags=32%, list=17%, signal=27%	8600/22925/51738/4923/29923/26154/1906/348/51083/1588/4602/1149/4023/948/718/222008/6863/5244/8529/1579/9370/5444/338/335
GO:0060074	synapse maturation	25	-0.736923	-1.51168	0.0138776	0.105165	3385	tags=56%, list=18%, signal=46%	22899/4774/84966/55638/4776/9148/50944/4747/5649/1524/63827/9378/124925/23544
GO:1904251	regulation of bile acid metabolic process	11	-0.831211	-1.53024	0.0138918	0.105165	619	tags=55%, list=3%, signal=53%	5629/2264/6770/340895/9965/9971
GO:0000470	maturation of LSU-rRNA	21	0.561622	1.59534	0.0139039	0.105165	6562	tags=71%, list=36%, signal=46%	23481/79707/4809/23246/117246/9875/11224/6130/55759/9326/55651/285855/65008/23560/4736
GO:0001990	regulation of systemic arterial blood pressure by hormone	35	-0.691611	-1.47159	0.013923	0.105165	2662	tags=49%, list=14%, signal=42%	1906/552/5125/56670/3291/10699/1907/1215/59272/185/5021/5972/1908/1066/27035/183/5345
GO:0001656	metanephros development	85	-0.628375	-1.41256	0.0139475	0.105165	3748	tags=47%, list=20%, signal=38%	947/7849/655/2303/51804/5155/9231/596/2737/6469/5159/3398/6662/79633/652/54361/2200/153572/5156/359/2302/6092/30812/79191/130497/388585/10736/5979/80000/3975/2625/79192/5455/5076/793/2719/2255/7490/9370/7021
GO:0000097	sulfur amino acid biosynthetic process	17	-0.782163	-1.51751	0.0139505	0.105165	259	tags=24%, list=1%, signal=23%	1491/635/1036/23743
GO:0032201	telomere maintenance via semi-conservative replication	27	0.529452	1.61278	0.0140603	0.105837	5500	tags=48%, list=30%, signal=34%	5558/2237/5425/5424/57804/6117/5426/51750/5983/23649/56655/6118/5984
GO:0032024	positive regulation of insulin secretion	65	-0.633134	-1.40928	0.0141	0.105981	3322	tags=34%, list=18%, signal=28%	55107/7447/2696/2852/8938/51738/55638/57393/640/2697/3651/222546/2752/2645/1080/2822/8431/4826/169026/9971/7200/5950
GO:0072224	metanephric glomerulus development	14	-0.795889	-1.4851	0.0142115	0.106663	1877	tags=50%, list=10%, signal=45%	5156/130497/5979/3975/5076/7490/9370
GO:0099068	postsynapse assembly	29	-0.710682	-1.48527	0.0143431	0.107493	2353	tags=41%, list=13%, signal=36%	5789/57502/9379/50944/26045/54413/7476/4916/9378/1056/347730/2596
GO:1901607	alpha-amino acid biosynthetic process	62	-0.645607	-1.43696	0.0143914	0.107558	1148	tags=13%, list=6%, signal=12%	27165/6507/635/23743/1373/5009/5053/189
GO:0034969	histone arginine methylation	12	-0.80725	-1.49252	0.0144078	0.107558	669	tags=17%, list=4%, signal=16%	56341/9971
GO:0034380	high-density lipoprotein particle assembly	10	-0.83926	-1.5133	0.0144145	0.107558	110	tags=40%, list=1%, signal=40%	3931/348/55937/335
GO:0050879	multicellular organismal movement	49	-0.669397	-1.46596	0.0146859	0.109265	3317	tags=43%, list=18%, signal=35%	4130/4621/6769/7138/246329/4151/1134/6329/8557/7134/7139/124093/1311/7136/844/6547/4625/7125/7140/342667/429
GO:0050881	musculoskeletal movement	49	-0.669397	-1.46596	0.0146859	0.109265	3317	tags=43%, list=18%, signal=35%	4130/4621/6769/7138/246329/4151/1134/6329/8557/7134/7139/124093/1311/7136/844/6547/4625/7125/7140/342667/429
GO:0009268	response to pH	35	-0.69042	-1.46906	0.0147372	0.109488	1957	tags=26%, list=11%, signal=23%	2697/3645/40/2822/7274/5105/6750/27035/10991
GO:0051883	killing of cells in other organism involved in symbiotic interaction	13	-0.818747	-1.52754	0.0148108	0.109876	1633	tags=46%, list=9%, signal=42%	6372/3853/5196/566/383/2147
GO:0001867	complement activation, lectin pathway	11	-0.829486	-1.52706	0.014877	0.110208	1457	tags=73%, list=8%, signal=67%	8547/5648/51435/78989/10584/2220/3848/10747
GO:0033047	regulation of mitotic sister chromatid segregation	66	0.348816	1.28921	0.0149077	0.110276	3822	tags=29%, list=21%, signal=23%	8379/10459/990/9232/9212/81620/472/891/10460/9787/84861/701/991/51433/699/10403/5347/8260/25906
GO:0071383	cellular response to steroid hormone stimulus	232	-0.548721	-1.26333	0.014985	0.110481	2662	tags=24%, list=14%, signal=21%	149563/655/5106/406/167465/677/6096/7421/5914/6781/2852/8644/445/2103/6753/1906/2706/861/652/2494/367/200845/11240/55885/57678/7035/8928/10002/3172/2104/1956/358/6755/8856/478/84709/116/158800/2660/4838/7101/2322/11170/2099/6770/6752/477/8431/54658/5105/5241/4246/9970/9971/383/4250
GO:1903321	negative regulation of protein modification by small protein conjugation or removal	80	0.339134	1.26538	0.0150069	0.110481	2628	tags=20%, list=14%, signal=17%	825/10362/23251/10459/3303/54984/408/706/51035/1020/2475/1499/11261/11315/3304/3984
GO:0002224	toll-like receptor signaling pathway	138	-0.584002	-1.33243	0.015015	0.110481	1556	tags=12%, list=8%, signal=11%	6280/948/6279/4057/6441/92747/2099/64922/729238/653509/3929/2266/9971/2244/2243/338
GO:0070230	positive regulation of lymphocyte apoptotic process	15	0.649583	1.72818	0.0150215	0.110481	2460	tags=47%, list=13%, signal=40%	3620/5027/5133/6352/581/84807/29126
GO:0050891	multicellular organismal water homeostasis	61	-0.642012	-1.42975	0.0151253	0.110953	2983	tags=31%, list=16%, signal=26%	6337/26154/2810/66002/59344/6340/359/2312/6338/358/1080/3868/242/3848/8529/525/361/1579/7021
GO:0033013	tetrapyrrole metabolic process	53	-0.668712	-1.47376	0.0151402	0.110953	1013	tags=11%, list=6%, signal=11%	6947/5644/1543/54658/3263/259
GO:0048261	negative regulation of receptor-mediated endocytosis	22	-0.728651	-1.46745	0.0151595	0.110953	1885	tags=27%, list=10%, signal=25%	23208/26045/54550/341/347730/344
GO:0009395	phospholipid catabolic process	37	-0.692688	-1.47435	0.0151722	0.110953	1236	tags=19%, list=7%, signal=18%	133121/123745/283748/3990/341/27329/344
GO:2001023	regulation of response to drug	82	-0.612892	-1.37745	0.0152439	0.111319	3140	tags=40%, list=17%, signal=34%	135/5071/51738/83849/8973/84258/6865/127833/3351/1812/5999/120892/3356/6387/51083/90019/1815/2661/23208/1136/91683/130497/6857/1268/57586/6623/1813/143425/1141/477/9283/183/383
GO:0003073	regulation of systemic arterial blood pressure	83	-0.613355	-1.37745	0.0152749	0.111387	3070	tags=46%, list=17%, signal=38%	22953/2702/4923/3816/1906/66002/552/5125/367/148/56670/83988/2621/80763/3291/2697/4878/10699/1907/10631/1215/170690/134/40/5800/59272/185/1813/5021/5972/1908/1066/8529/9283/27035/183/1579/5345
GO:1904424	regulation of GTP binding	12	0.679591	1.66546	0.0153804	0.111997	2237	tags=42%, list=12%, signal=37%	4233/9750/79822/26086/3925
GO:0060350	endochondral bone morphogenesis	69	-0.624957	-1.39978	0.0154162	0.112099	3441	tags=45%, list=19%, signal=37%	1303/5914/338773/6781/7010/1749/1277/6662/85301/81578/1293/652/1305/2261/8785/7373/340706/8817/8313/162466/249/658/4880/51435/1311/3549/642658/4148/5212/4322/1280
GO:1902653	secondary alcohol biosynthetic process	65	-0.63066	-1.40377	0.0154718	0.112202	1247	tags=11%, list=7%, signal=10%	3158/1080/2246/1066/29881/338/335
GO:0030317	flagellated sperm motility	63	-0.634299	-1.41456	0.0154959	0.112202	2832	tags=33%, list=15%, signal=28%	116369/6865/285335/1235/9148/286207/6869/1672/23639/80217/64518/85413/27285/202500/84229/83853/480/27019/11189/9104/338
GO:0097722	sperm motility	63	-0.634299	-1.41456	0.0154959	0.112202	2832	tags=33%, list=15%, signal=28%	116369/6865/285335/1235/9148/286207/6869/1672/23639/80217/64518/85413/27285/202500/84229/83853/480/27019/11189/9104/338
GO:0033210	leptin-mediated signaling pathway	10	-0.838039	-1.5111	0.0156771	0.113354	977	tags=30%, list=5%, signal=28%	3953/3952/4504
GO:0016073	snRNA metabolic process	31	0.502988	1.58992	0.0159649	0.115273	4108	tags=55%, list=22%, signal=43%	64852/26173/79650/55756/55174/55505/114034/5394/80789/54512/54973/79066/56915/5393/23016/118460/23404
GO:0033108	mitochondrial respiratory chain complex assembly	95	0.351769	1.38036	0.0159999	0.115363	6084	tags=52%, list=33%, signal=35%	25813/84275/57505/790955/374291/25915/51079/51295/6341/57001/6834/4728/126328/4722/4702/10063/28976/4713/55572/4714/4723/284184/83943/617/4731/4717/4729/54949/84987/29796/4725/644096/4700/4708/4716/51300/28958/54539/4695/29090/100131801/51287/55101/91942/4704/285521/51241/100303755/51103
GO:0010742	macrophage derived foam cell differentiation	34	-0.701423	-1.48837	0.0162028	0.116498	1622	tags=26%, list=9%, signal=24%	4023/5320/5196/948/185/8435/183/9370/338
GO:0090077	foam cell differentiation	34	-0.701423	-1.48837	0.0162028	0.116498	1622	tags=26%, list=9%, signal=24%	4023/5320/5196/948/185/8435/183/9370/338
GO:0051957	positive regulation of amino acid transport	16	-0.769666	-1.47092	0.0162541	0.116704	146	tags=31%, list=1%, signal=31%	59272/6529/183/7200/10991
GO:0008207	C21-steroid hormone metabolic process	33	-0.694267	-1.46761	0.0163577	0.117248	3085	tags=45%, list=17%, signal=38%	8644/27122/9256/10858/653/10170/54361/1646/1583/1645/6770/1586/10202/1109/174
GO:1901658	glycosyl compound catabolic process	39	-0.680701	-1.45135	0.0163775	0.117248	1629	tags=15%, list=9%, signal=14%	200315/10930/151531/57733/1807/51733
GO:0046164	alcohol catabolic process	48	-0.662819	-1.44428	0.0163984	0.117248	3246	tags=38%, list=18%, signal=31%	55809/8644/4923/10858/222/348/6817/27284/6799/9108/27124/57016/27233/6783/1056/131/127/4504
GO:0051873	killing by host of symbiont cells	10	-0.836213	-1.50781	0.0165188	0.117945	1519	tags=50%, list=8%, signal=46%	6372/5196/566/383/2147
GO:0072207	metanephric epithelium development	24	-0.74301	-1.52042	0.0165753	0.118175	2926	tags=46%, list=16%, signal=39%	6662/79633/54361/30812/130497/388585/5455/5076/793/7490/9370
GO:2001251	negative regulation of chromosome organization	132	0.311254	1.19356	0.0165971	0.118175	3822	tags=26%, list=21%, signal=21%	6622/3006/8379/7291/10459/54984/9232/9212/5252/81620/26155/65057/7349/472/3159/55011/891/2067/5394/84861/6598/701/991/80119/699/672/23028/4171/10403/54386/5347/8260/3720/25906
GO:0030513	positive regulation of BMP signaling pathway	31	-0.695206	-1.45623	0.0166482	0.118375	2855	tags=35%, list=16%, signal=30%	23213/652/23090/494470/2626/388585/8200/4487/2719/6664/286204
GO:0090183	regulation of kidney development	52	-0.665629	-1.46731	0.0167107	0.118429	3710	tags=48%, list=20%, signal=38%	7849/655/51804/5155/6469/5159/6662/79633/9241/652/7482/54361/80310/8842/30812/130497/10736/8710/5979/3975/2625/5076/183/7490/9370
GO:0071548	response to dexamethasone	36	-0.694548	-1.48007	0.0167122	0.118429	2953	tags=33%, list=16%, signal=28%	445/1906/2706/2056/1956/358/387758/2660/6770/5105/1373/383
GO:0033046	negative regulation of sister chromatid segregation	42	0.450938	1.5031	0.0167481	0.118429	3822	tags=36%, list=21%, signal=28%	8379/10459/9232/9212/81620/472/891/84861/701/991/699/10403/5347/8260/25906
GO:0051985	negative regulation of chromosome segregation	42	0.450938	1.5031	0.0167481	0.118429	3822	tags=36%, list=21%, signal=28%	8379/10459/9232/9212/81620/472/891/84861/701/991/699/10403/5347/8260/25906
GO:0043476	pigment accumulation	12	0.674877	1.65391	0.0169625	0.11862	3426	tags=58%, list=19%, signal=47%	23682/967/10981/8943/8907/388552/26258
GO:0043482	cellular pigment accumulation	12	0.674877	1.65391	0.0169625	0.11862	3426	tags=58%, list=19%, signal=47%	23682/967/10981/8943/8907/388552/26258
GO:0001503	ossification	360	-0.519496	-1.19648	0.016983	0.11862	4058	tags=35%, list=22%, signal=28%	5364/3491/4015/23601/84059/8519/4653/1490/3569/115908/7286/655/4086/2303/8321/7043/1901/148979/3082/6096/26585/285313/338773/7124/596/7473/6781/2737/9902/6469/255743/8600/5167/6678/3398/3199/7010/1749/1277/6662/79633/43/9241/5251/23314/1050/64093/8840/4920/3020/7042/652/2662/3400/1462/653/1305/7481/6261/2261/54361/4330/5745/2263/9365/1278/3572/5743/9464/8817/1290/1009/2697/1591/374/22801/8313/897…
GO:0001655	urogenital system development	318	-0.525559	-1.21034	0.016983	0.11862	4005	tags=36%, list=22%, signal=29%	1027/9863/56603/9788/1028/2294/57216/3911/51301/4854/947/7849/655/51196/6385/2028/4086/2303/51804/9742/342372/5155/3691/5420/285/760/5914/9231/596/2737/6382/7161/4774/6469/255743/5159/3398/5017/7010/2247/445/84662/93649/6662/79633/2048/23213/9241/5629/26249/7042/652/168002/3400/55959/5125/367/7482/7481/1634/10818/168667/1592/120892/54361/2263/2200/80310/153572/2049/84623/8842/5156/359/2302/6092/4…
GO:0002221	pattern recognition receptor signaling pathway	186	-0.561083	-1.28802	0.016983	0.11862	1556	tags=11%, list=8%, signal=10%	6280/57115/948/114771/6279/4057/1755/6441/92747/2099/64922/729238/653509/3929/2266/9971/2244/2243/114770/338
GO:0007178	transmembrane receptor protein serine/threonine kinase signaling pathway	312	-0.525731	-1.21125	0.016983	0.11862	4450	tags=38%, list=24%, signal=29%	7122/55512/7474/4091/10140/94/114990/3725/91/6498/58495/4092/6653/63976/151449/3491/4015/9863/1028/80139/9315/655/55612/4052/50848/4086/8321/7043/10923/1003/26585/147409/2530/57057/6469/255743/27250/2331/1749/93649/6935/27122/4053/2615/23213/94031/9241/3175/4920/7042/652/2662/1281/168002/392255/23090/653/9719/494470/3624/168667/5654/5046/2626/65997/2200/1278/269/10468/2661/8928/7057/55273/64081/3…
GO:0009755	hormone-mediated signaling pathway	207	-0.5548	-1.27812	0.016983	0.11862	2620	tags=18%, list=14%, signal=16%	861/652/2494/367/1393/200845/11240/55885/6751/57678/8928/1395/10002/3172/2104/6755/7253/8856/59350/8549/1394/158800/4838/7101/5972/2099/6752/5618/8431/6750/5241/4246/9970/2642/9971/7200/4250
GO:0033002	muscle cell proliferation	184	-0.5603	-1.28601	0.016983	0.11862	4479	tags=42%, list=24%, signal=32%	3592/55512/5058/6495/3606/3673/7015/3725/3586/2260/1027/7472/3569/7168/4854/693175/239/4086/2303/7043/1901/5155/10203/7124/7161/2852/57057/6469/5159/27250/2627/3398/2247/93649/57447/6910/9241/3593/5592/8840/1906/7042/652/3351/2263/4211/80310/5743/23493/2047/2697/7057/65009/23414/4602/26011/1956/3488/2006/8862/4880/388585/3776/4969/7434/4881/2660/2069/2254/2066/7432/283/27035/183/5345/9370/5950
GO:0048167	regulation of synaptic plasticity	172	-0.563023	-1.29211	0.016983	0.11862	2344	tags=28%, list=13%, signal=25%	1812/348/815/5743/152330/2904/9148/1395/6543/91683/50944/3745/57338/575/5649/134/1394/2905/6343/5764/794/26045/23025/2259/6547/54413/1813/2903/7101/4137/3766/11170/6344/23237/6770/4915/57282/25769/1524/10590/6616/10814/793/6900/140730/347730/7143/2890/183
GO:0009069	serine family amino acid metabolic process	38	-0.685676	-1.46327	0.0170261	0.118759	783	tags=16%, list=4%, signal=15%	2731/10247/10993/1036/570/189
GO:0033260	nuclear DNA replication	59	0.373896	1.35052	0.0171083	0.119076	3341	tags=31%, list=18%, signal=25%	5558/8318/4174/2237/5888/81620/80174/5425/3978/5424/57804/8317/51053/54962/4176/4172/6117/4171
GO:0019218	regulation of steroid metabolic process	106	-0.601812	-1.36227	0.0171371	0.119076	646	tags=23%, list=4%, signal=22%	8644/3638/84649/27122/5629/653/2264/348/54361/57678/51083/185/2246/3952/6770/145264/340895/9965/341/54658/183/9971/338/335
GO:0051963	regulation of synapse assembly	95	-0.60778	-1.37375	0.0171411	0.119076	2540	tags=35%, list=14%, signal=30%	347902/57633/5789/9423/2239/2049/2047/89780/6092/576/27286/575/6585/94030/79953/40/26045/54413/7476/577/5021/84189/1141/4915/147381/375323/4916/54674/9378/347730/22865/64084/2596
GO:0018208	peptidyl-proline modification	48	0.392492	1.35123	0.0173932	0.120664	2999	tags=33%, list=16%, signal=28%	55214/2289/51303/10491/5300/28989/2286/9049/60681/10450/23770/5479/55033/54583/5524/64175
GO:0042136	neurotransmitter biosynthetic process	87	-0.611829	-1.37944	0.0174445	0.120855	2972	tags=31%, list=16%, signal=26%	6531/445/43/1906/3067/9722/5743/2571/1644/3043/948/4843/1191/6542/4842/1621/5806/7166/6507/7054/1524/6532/9104/183/5053/189/51733
GO:0014075	response to amine	43	-0.669085	-1.4422	0.0175013	0.120855	3247	tags=42%, list=18%, signal=35%	6571/135/445/3176/1812/5999/5153/1815/2731/1621/1813/2903/5021/7054/3747/3746/1373/383
GO:0010842	retina layer formation	20	-0.752406	-1.50236	0.0175345	0.120855	949	tags=35%, list=5%, signal=33%	8842/84465/121643/3975/793/1826/7021
GO:0071467	cellular response to pH	20	-0.751965	-1.50148	0.0175345	0.120855	1957	tags=30%, list=11%, signal=27%	2697/3645/2822/5105/27035/10991
GO:0006544	glycine metabolic process	15	-0.78888	-1.47947	0.0175389	0.120855	783	tags=33%, list=4%, signal=32%	2731/10247/10993/570/189
GO:0048844	artery morphogenesis	63	-0.632492	-1.41053	0.017562	0.120855	4481	tags=48%, list=24%, signal=36%	64220/6495/94/4638/4035/5396/4092/2294/4854/6899/2303/5159/2702/93649/9241/5629/7042/652/1281/7481/348/9464/23493/8928/2348/1311/4036/27329/7021/338
GO:2000641	regulation of early endosome to late endosome transport	17	0.592185	1.64962	0.017634	0.121112	3932	tags=59%, list=21%, signal=46%	25930/1601/5605/8898/5604/55823/4478/23317/7430/5594
GO:0072243	metanephric nephron epithelium development	21	-0.738438	-1.47406	0.0176471	0.121112	1702	tags=43%, list=9%, signal=39%	6662/79633/30812/130497/388585/5455/5076/793/9370
GO:0070050	neuron cellular homeostasis	32	-0.704587	-1.48051	0.0176702	0.121112	3390	tags=56%, list=18%, signal=46%	783/4130/5071/776/9256/3351/1134/57030/55277/134/1268/794/4753/6530/23498/10590/793/491
GO:0072529	pyrimidine-containing compound catabolic process	35	-0.684098	-1.4556	0.0178376	0.121947	1629	tags=14%, list=9%, signal=13%	200315/10930/151531/1807/51733
GO:0051938	L-glutamate import	14	-0.786748	-1.46805	0.0178921	0.121947	1659	tags=57%, list=9%, signal=52%	6505/4923/57030/6511/3766/6507/477/6506
GO:0003333	amino acid transmembrane transport	69	-0.632076	-1.41572	0.0179227	0.121947	1659	tags=35%, list=9%, signal=32%	92745/6505/4923/6536/10630/5999/81539/57030/6539/6534/6519/6542/6511/11136/6512/3766/6507/83733/56301/477/55089/6506/183/10991
GO:0070228	regulation of lymphocyte apoptotic process	49	0.397217	1.35923	0.017932	0.121947	1823	tags=33%, list=10%, signal=29%	79444/171558/384/3620/5027/939/5133/6352/100/917/3958/9212/581/26155/695/84807
GO:0070206	protein trimerization	52	-0.664122	-1.46399	0.0179601	0.121947	265	tags=10%, list=1%, signal=10%	55600/6506/5009/9370/383
GO:0048562	embryonic organ morphogenesis	265	-0.535279	-1.23147	0.017982	0.121947	3970	tags=39%, list=22%, signal=31%	6911/2294/115908/57216/124590/55036/7849/655/9645/6899/2303/1750/51804/7043/9742/2535/3218/5080/26018/1942/51168/2737/57057/6469/3398/3638/3199/3373/1749/6662/6935/2048/2637/3212/9241/23314/10083/3204/4237/5629/125488/4920/1906/652/7483/9368/57453/7481/10818/9620/9423/4188/10804/2263/2626/579/53904/2202/2200/219736/9464/51384/8928/8557/2697/7545/5156/3213/259236/1746/65009/89780/2487/64321/6913/2…
GO:0051146	striated muscle cell differentiation	252	-0.53919	-1.24074	0.017982	0.121947	3382	tags=35%, list=18%, signal=29%	26585/5914/50937/338773/596/8538/7504/4621/3880/6382/6469/5159/2318/2627/22953/84033/93649/7138/6910/246329/5629/26287/1906/57462/652/552/8038/7111/10818/148/6261/9172/91807/101929726/5999/1048/2626/27063/341676/115701/23493/8557/4878/5156/89780/4868/3488/84700/7139/10529/575/9254/10753/221476/3084/7273/4842/127294/90342/1311/58529/8740/10324/4892/88/4703/844/845/84665/56203/124857/57817/493829/2…
GO:0071229	cellular response to acid chemical	196	-0.556304	-1.27957	0.017982	0.121947	4009	tags=34%, list=22%, signal=27%	5737/5753/7472/56603/7292/27244/53335/2707/56034/6899/5155/6096/5914/7124/7473/143686/5732/55915/8644/3199/1277/84649/445/6662/11211/6935/4776/1906/7483/1281/552/7481/2263/5729/1278/80310/9148/1290/5156/359/89780/1646/4602/1956/358/2348/4023/130497/158376/7475/1620/1645/5979/57817/3952/4915/5244/5076/4916/6532/5105/1373/57795/9971/1109/338
GO:0032355	response to estradiol	121	-0.59386	-1.35053	0.0180513	0.121953	3197	tags=28%, list=17%, signal=23%	2852/5159/10266/1277/445/6753/3767/2706/5066/1393/6751/7035/5743/2697/374/1956/10631/5764/3549/7476/5021/5179/2099/3952/7054/6752/6532/2255/54658/6529/183/117/338/2155
GO:0061333	renal tubule morphogenesis	74	-0.625659	-1.40778	0.0180513	0.121953	3290	tags=43%, list=18%, signal=36%	596/2737/6469/255743/2247/6662/79633/9241/26249/652/7482/7481/54361/153572/30812/79191/130497/388585/10736/7475/170690/8549/5087/80000/2246/3975/2625/79192/5076/2719/183/7490
GO:0006865	amino acid transport	123	-0.591168	-1.34349	0.0180542	0.121953	1659	tags=24%, list=9%, signal=22%	2917/57030/6539/6534/6519/8499/134/6542/6857/27165/59272/6540/6511/11136/6512/3766/6507/83733/3952/4915/56301/6616/477/55089/6529/6506/183/383/7200/10991
GO:0019432	triglyceride biosynthetic process	35	-0.682729	-1.45269	0.018319	0.123446	2491	tags=29%, list=14%, signal=25%	80168/57678/4023/2822/718/346606/392636/5105/7069/9104
GO:0001504	neurotransmitter uptake	44	-0.675367	-1.46323	0.0183233	0.123446	3247	tags=55%, list=18%, signal=45%	6571/5071/6505/4923/6531/6536/1812/5999/81539/1815/2752/4842/6570/6530/1813/6511/6512/3766/6507/6616/477/6532/6529/6506
GO:0003281	ventricular septum development	72	-0.618203	-1.38649	0.0184049	0.123834	5167	tags=60%, list=28%, signal=43%	161882/4194/4851/8543/3280/5754/26508/6299/9353/7049/1482/64220/7474/4091/9782/4092/3491/53834/57216/7849/57493/4052/8321/2535/3398/2702/6910/9241/5629/7042/652/7481/10818/2263/2626/6586/23493/6092/23414/199699/4036/2625/6664
GO:2000479	regulation of cAMP-dependent protein kinase activity	16	-0.77246	-1.47626	0.0184502	0.123944	1138	tags=31%, list=6%, signal=29%	5569/5570/10886/4485/9370
GO:0090659	walking behavior	28	-0.719803	-1.49409	0.0184698	0.123944	2344	tags=36%, list=13%, signal=31%	1812/2743/58524/7545/51286/1813/3766/6323/6900/7200
GO:0007091	metaphase/anaphase transition of mitotic cell cycle	54	0.391394	1.38007	0.0184937	0.123944	3822	tags=31%, list=21%, signal=25%	8379/10459/990/9212/81620/472/891/10460/9787/84861/701/991/51433/699/10403/5347/25906
GO:0009948	anterior/posterior axis specification	40	-0.671512	-1.43431	0.0185848	0.124389	3285	tags=42%, list=18%, signal=35%	7473/6469/441478/3170/652/10818/5046/23493/163589/10736/4838/1045/3975/6997/1044/2719/7490
GO:0032508	DNA duplex unwinding	107	0.324703	1.23259	0.0186155	0.124389	4979	tags=38%, list=27%, signal=28%	89797/8318/4174/5888/2068/22907/3159/5965/641/164045/23132/10721/4176/4172/80119/6117/10856/2547/7311/4171/2968/7508/51659/8607/9401/1107/7314/54921/56652/1643/1642/9557/84515/84296/9978/51750/93973/1663/4175/5983/2966
GO:0008585	female gonad development	87	-0.610799	-1.37712	0.018658	0.124389	2405	tags=28%, list=13%, signal=24%	3624/54361/269/6586/2661/5156/6092/23414/1588/1299/2620/658/5806/116/5798/2069/89766/56956/2099/3952/283/5241/7490/174
GO:0007020	microtubule nucleation	26	0.545507	1.65066	0.0186693	0.124389	5090	tags=54%, list=28%, signal=39%	3303/51199/7283/29098/3304/1639/2801/10844/24139/85378/114791/54820/4204/27229
GO:0032689	negative regulation of interferon-gamma production	32	-0.693168	-1.45652	0.0186813	0.124389	2694	tags=41%, list=15%, signal=35%	53833/9173/3624/2621/90865/57115/654346/114771/284194/2625/7356/26525/9971
GO:0031102	neuron projection regeneration	54	-0.644811	-1.42367	0.0187696	0.124815	1652	tags=20%, list=9%, signal=19%	2348/56963/4747/11202/5764/4099/4916/4974/7143/2596/335
GO:0050678	regulation of epithelial cell proliferation	314	-0.532504	-1.22724	0.0189614	0.125476	3610	tags=30%, list=20%, signal=24%	677/1750/51804/2683/5155/5080/2252/28984/7421/7124/2277/6469/441478/79805/6678/83481/7010/3373/1749/2247/51738/64127/10344/6662/23213/9241/5629/2810/7042/652/55959/653/367/10818/348/2263/5654/187/6387/1232/6331/219736/2697/7057/374/64081/89780/2064/2752/1956/7060/130497/8862/388585/7857/6423/9982/6657/116844/5764/5798/3549/27202/2069/185/4838/7476/10247/5967/7051/2254/2246/64102/255324/3952/8200/…
GO:0007187	G protein-coupled receptor signaling pathway, coupled to cyclic nucleotide second messenger	188	-0.557076	-1.27791	0.018981	0.125476	3577	tags=41%, list=19%, signal=34%	1901/266977/196883/10268/1132/10203/64123/152/151/799/2852/2916/5732/135/10266/776/6753/1909/1906/146/9368/1131/1903/148/3355/3351/1812/2847/347088/6751/5745/3356/1232/5731/3363/1815/8811/1395/2917/11251/150/6755/576/575/768239/84873/5196/7253/5744/9340/59350/8549/333/134/4842/1268/1394/165140/2740/116/10149/797/27201/64805/1813/5733/577/2914/2918/1113/6752/7432/2899/9283/796/183/2642/4886
GO:0007188	adenylate cyclase-modulating G protein-coupled receptor signaling pathway	170	-0.563029	-1.2927	0.018981	0.125476	3577	tags=42%, list=19%, signal=34%	1901/266977/196883/10268/1132/10203/64123/152/151/799/2852/2916/5732/135/10266/776/1909/1906/146/9368/1131/1903/148/3355/3351/1812/2847/347088/5745/1232/5731/1815/8811/1395/2917/11251/150/576/575/768239/84873/5196/7253/5744/9340/59350/8549/333/134/4842/1268/1394/165140/2740/116/10149/797/27201/64805/1813/5733/577/2914/2918/1113/6752/7432/2899/9283/796/2642/4886
GO:0061448	connective tissue development	249	-0.538355	-1.23851	0.018981	0.125476	4681	tags=47%, list=25%, signal=35%	5916/91355/1958/650/6097/144347/3202/5307/4146/55512/7474/6474/94/5396/4041/6653/54360/2260/151449/3491/4015/1490/947/655/64641/4086/2303/5155/1303/26585/5914/8538/6781/2737/5159/1289/3398/3373/2247/51738/1277/84649/6662/6935/85301/23213/9241/81578/23314/1293/1302/8840/4920/1906/7045/652/7483/3400/392255/55959/9658/653/176/7482/7481/4060/81792/2261/8785/7373/5745/579/2202/80310/340706/9464/8817/3…
GO:0055002	striated muscle cell development	144	-0.572836	-1.30686	0.019	0.125476	3290	tags=39%, list=18%, signal=32%	596/7504/4621/3880/6382/5159/2318/22953/84033/7138/246329/5629/1906/57462/652/7111/148/6261/9172/91807/5999/2626/27063/115701/23493/8557/4878/5156/84700/7139/10529/9254/10753/221476/7273/127294/1311/58529/10324/4892/88/4703/844/845/84665/56203/124857/57817/8736/4606/70/92737/7140/79933/58/183
GO:0043267	negative regulation of potassium ion transport	28	-0.704348	-1.46201	0.0190157	0.125476	2268	tags=39%, list=12%, signal=34%	5999/3356/3757/283518/4842/116/88/845/23630/7432/23704
GO:0010463	mesenchymal cell proliferation	43	-0.66601	-1.43557	0.019078	0.125536	4608	tags=65%, list=25%, signal=49%	650/7474/6495/6474/5396/4041/2260/7472/2294/655/6899/2252/6469/6662/6935/79633/652/7481/2263/9464/130497/10736/8646/5764/3549/2254/4487/2719
GO:0002675	positive regulation of acute inflammatory response	27	-0.717548	-1.48831	0.0191226	0.125536	2153	tags=33%, list=12%, signal=29%	3572/5743/1268/718/5733/6863/2161/3818/84699
GO:0042759	long-chain fatty acid biosynthetic process	27	-0.713718	-1.48037	0.0191226	0.125536	627	tags=30%, list=3%, signal=29%	246/242/1543/1576/1565/1571/1559/1558
GO:0051955	regulation of amino acid transport	27	-0.718356	-1.48999	0.0191226	0.125536	1366	tags=37%, list=7%, signal=34%	2917/134/59272/3952/477/6529/183/383/7200/10991
GO:0032411	positive regulation of transporter activity	105	-0.601288	-1.36011	0.0191726	0.125703	3003	tags=30%, list=16%, signal=26%	4923/6769/2048/246329/3767/54209/9722/5243/51083/1815/8811/9001/4878/5649/27092/1080/88/2259/844/10345/54413/23237/3747/3736/3746/342667/219527/3359/482/5174/9104/5444
GO:0072178	nephric duct morphogenesis	11	-0.797913	-1.46894	0.0192308	0.125924	1621	tags=55%, list=9%, signal=50%	652/130497/3975/2625/5076/2719
GO:0031640	killing of cells of other organism	36	-0.691565	-1.47371	0.0192588	0.125947	1633	tags=33%, list=9%, signal=30%	3853/57115/5196/4843/114771/4057/57817/1113/6283/566/383/2147
GO:0097327	response to antineoplastic agent	85	-0.605541	-1.36123	0.0193089	0.126115	1892	tags=14%, list=10%, signal=13%	2056/1956/358/387758/4747/2660/167127/6770/5105/1373/383/2155
GO:0006213	pyrimidine nucleoside metabolic process	33	-0.692938	-1.4648	0.019474	0.126855	1629	tags=15%, list=9%, signal=14%	200315/10930/151531/1807/51733
GO:0046460	neutral lipid biosynthetic process	37	-0.686709	-1.46162	0.0194964	0.126855	2491	tags=41%, list=14%, signal=35%	51196/5106/2182/84649/80168/57678/4023/2822/718/346606/392636/283/5105/7069/9104
GO:0046463	acylglycerol biosynthetic process	37	-0.686709	-1.46162	0.0194964	0.126855	2491	tags=41%, list=14%, signal=35%	51196/5106/2182/84649/80168/57678/4023/2822/718/346606/392636/283/5105/7069/9104
GO:0007040	lysosome organization	59	0.369954	1.33628	0.0195743	0.126995	1763	tags=27%, list=10%, signal=25%	8406/1130/5027/89781/57617/1200/11151/54982/219931/3257/2629/4669/51172/4647/79158/2896
GO:0080171	lytic vacuole organization	59	0.369954	1.33628	0.0195743	0.126995	1763	tags=27%, list=10%, signal=25%	8406/1130/5027/89781/57617/1200/11151/54982/219931/3257/2629/4669/51172/4647/79158/2896
GO:0043368	positive T cell selection	34	0.467092	1.4748	0.0195993	0.126995	1907	tags=35%, list=10%, signal=32%	3662/3707/915/7535/3594/30009/916/114836/84695/917/4063/2475
GO:0072176	nephric duct development	15	-0.784871	-1.47195	0.0196265	0.126995	2572	tags=53%, list=14%, signal=46%	652/7481/130497/80000/3975/2625/5076/2719
GO:0045066	regulatory T cell differentiation	31	0.494311	1.56249	0.0196416	0.126995	2287	tags=35%, list=12%, signal=31%	3902/3458/26279/10385/1493/11006/3659/2175/2177/3559/10288
GO:0043628	ncRNA 3'-end processing	37	0.435207	1.40675	0.019722	0.127354	5329	tags=54%, list=29%, signal=38%	345630/55520/26173/79650/114034/5394/80789/54512/90459/60528/56915/5393/23016/118460/23404/3028/26024/51728/2091/79033
GO:1901018	positive regulation of potassium ion transmembrane transporter activity	22	-0.722782	-1.45563	0.0198135	0.127728	2624	tags=50%, list=14%, signal=43%	54209/9722/51083/8811/4878/88/3747/3736/3746/219527/482
GO:0051954	positive regulation of amine transport	30	-0.713288	-1.49108	0.0198297	0.127728	2676	tags=53%, list=15%, signal=46%	135/4923/6865/552/6387/1815/3745/59272/1813/5021/1141/7432/6529/183/7200/10991
GO:0048839	inner ear development	171	-0.560062	-1.28534	0.01998	0.128342	4195	tags=48%, list=23%, signal=37%	5396/54360/2260/9497/84059/1027/115908/57216/3777/124590/9890/7849/6899/6385/1750/51804/7043/2535/26018/51168/3714/2737/6469/5159/6678/3638/1749/6662/6935/79633/2103/2048/2637/10083/1050/5629/125488/4920/2706/7042/652/9368/9620/9423/168667/10804/2263/53904/3784/219736/23493/8557/7545/259236/64072/89780/3208/2487/8825/2561/1301/7399/388585/8549/3776/6657/140469/65217/9547/2558/2254/84189/55584/262…
GO:0098656	anion transmembrane transport	252	-0.538453	-1.23905	0.01998	0.128342	2856	tags=28%, list=16%, signal=24%	92745/6505/4923/6536/1188/116369/26266/2563/6559/10630/2564/285335/55879/389015/5243/2743/338440/5999/81539/266675/7057/9022/57419/11095/57101/57030/2348/2561/130497/6539/6550/6534/6519/144453/284525/6542/5348/1080/54102/115019/9498/162515/2555/2558/22802/115111/6511/11136/6512/3766/6507/83733/57282/25769/4036/56301/160728/2568/6557/10998/477/8001/366/7069/57348/1811/55089/284111/6506/183/10991
GO:0060065	uterus development	21	-0.728123	-1.45347	0.02	0.128342	813	tags=43%, list=4%, signal=41%	93649/7042/1588/80000/7476/2099/3975/2625/5950
GO:0071549	cellular response to dexamethasone stimulus	27	-0.705496	-1.46332	0.0202475	0.129708	1698	tags=30%, list=9%, signal=27%	445/2706/1956/358/2660/6770/5105/383
GO:0048644	muscle organ morphogenesis	77	-0.604839	-1.36163	0.0202634	0.129708	4608	tags=61%, list=25%, signal=46%	650/1482/7474/6474/4638/4092/283284/5318/7472/57216/7168/1832/6899/57493/2303/8321/1901/2535/57057/140706/9241/5629/6939/7042/1281/9172/2263/27063/23493/8928/8557/23414/7134/7139/1301/145258/3084/7273/85366/127294/7135/4634/4625/8736/4606/4036/70
GO:0007616	long-term memory	30	-0.712528	-1.48949	0.0204962	0.131035	2278	tags=37%, list=12%, signal=32%	4776/348/164312/57030/50944/5649/1813/23237/6863/793/2890
GO:0046427	positive regulation of receptor signaling pathway via JAK-STAT	70	-0.619024	-1.38509	0.020555	0.131128	2814	tags=26%, list=15%, signal=22%	3593/149233/2690/2261/8784/3572/8995/2056/388585/9244/2322/2066/3952/5618/50604/183/3263/2147
GO:0006268	DNA unwinding involved in DNA replication	14	0.656458	1.70504	0.0205696	0.131128	5464	tags=79%, list=30%, signal=55%	5888/3159/5965/641/4176/6117/4171/9401/56652/4175/9400
GO:0006775	fat-soluble vitamin metabolic process	39	-0.670149	-1.42885	0.0205934	0.131128	2560	tags=33%, list=14%, signal=29%	66002/5947/1592/1591/1583/6121/4036/5948/1543/7274/8529/1576/1381
GO:0006691	leukotriene metabolic process	24	-0.72302	-1.47952	0.0206422	0.131128	2793	tags=42%, list=15%, signal=35%	239/2681/124975/66002/4051/246/5319/8529/1800/1579
GO:0061217	regulation of mesonephros development	24	-0.726194	-1.48601	0.0206422	0.131128	2926	tags=46%, list=16%, signal=39%	6662/9241/652/7482/30812/10736/3975/2625/5076/183/7490
GO:0034508	centromere complex assembly	51	0.39653	1.3879	0.0206641	0.131128	3662	tags=33%, list=20%, signal=27%	8367/8365/55839/121504/79019/8294/8370/8360/201254/79172/55355/80152/4678/8363/57082/1058/8607
GO:0006890	retrograde vesicle-mediated transport, Golgi to endoplasmic reticulum	84	0.331816	1.2706	0.0208938	0.132422	4728	tags=42%, list=26%, signal=31%	150786/51560/3797/26286/9463/22820/11004/23423/57410/3835/11015/55738/10749/11070/57222/11316/9493/81930/55850/6836/64837/54732/81876/8729/372/51272/11079/8775/3064/6892/662/25839/1062/10945/3832
GO:0050832	defense response to fungus	22	-0.720162	-1.45035	0.020979	0.132768	1556	tags=45%, list=8%, signal=42%	6280/5919/6279/4057/57817/84659/1113/6283/26525/383
GO:0034767	positive regulation of ion transmembrane transport	144	-0.570459	-1.30143	0.021	0.132768	3003	tags=32%, list=16%, signal=27%	4923/6769/2048/246329/3767/54209/9368/7070/9722/1812/930/5243/187/3784/51083/1815/8811/9001/4878/57165/3757/387129/5649/4842/5348/27092/1080/88/2259/844/10345/54413/23630/23237/1908/3747/3736/3746/342667/219527/3359/482/5174/9104/183/2147
GO:0055091	phospholipid homeostasis	11	-0.815647	-1.50159	0.0211882	0.133644	130	tags=27%, list=1%, signal=27%	3172/27329/335
GO:0010906	regulation of glucose metabolic process	105	-0.597359	-1.35122	0.0211907	0.133644	1388	tags=13%, list=8%, signal=12%	648791/2645/2822/3953/3795/3952/145264/4485/5207/2646/9104/3481/2642/9370
GO:0033197	response to vitamin E	12	-0.790251	-1.46109	0.021263	0.133935	628	tags=25%, list=3%, signal=24%	1277/3952/383
GO:0015872	dopamine transport	41	-0.660941	-1.41926	0.0213675	0.134429	3247	tags=61%, list=18%, signal=50%	6571/5071/6531/83849/8973/84258/127833/3351/1812/3356/6387/90019/1815/23208/91683/6857/1268/225689/6530/57586/6623/1813/143425/1141/6580
GO:0030277	maintenance of gastrointestinal epithelium	19	-0.748018	-1.47159	0.0214541	0.134809	1866	tags=42%, list=10%, signal=38%	64081/4588/7032/12/4583/7031/340547/5950
GO:0006111	regulation of gluconeogenesis	38	-0.668378	-1.42636	0.0215285	0.135064	1254	tags=16%, list=7%, signal=15%	2645/3953/3952/145264/4485/9370
GO:0006883	cellular sodium ion homeostasis	14	-0.779605	-1.45472	0.0215736	0.135064	1998	tags=50%, list=11%, signal=45%	64699/478/479/477/480/482/183
GO:0051386	regulation of neurotrophin TRK receptor signaling pathway	12	-0.787359	-1.45574	0.0215736	0.135064	1807	tags=33%, list=10%, signal=30%	4908/55816/4916/183
GO:0010743	regulation of macrophage derived foam cell differentiation	28	-0.711599	-1.47706	0.021922	0.136761	1622	tags=29%, list=9%, signal=26%	4023/5320/5196/948/185/183/9370/338
GO:0001894	tissue homeostasis	204	-0.549725	-1.26613	0.021978	0.136761	1978	tags=17%, list=11%, signal=15%	8842/1258/64081/64072/92211/1956/7399/4588/387597/7032/3549/642658/4057/12/65217/24/158046/6101/6441/6121/4583/3848/7031/729238/51208/1280/653509/340547/9476/1472/796/7018/213/5304/5950
GO:0019318	hexose metabolic process	229	-0.542874	-1.25035	0.021978	0.136761	3136	tags=18%, list=17%, signal=15%	80183/5167/5071/51738/84649/114899/2103/8277/3170/3175/3767/51363/3487/2819/8789/2027/3651/8534/10690/648791/2645/132158/2822/3953/3795/3952/145264/10993/4485/5207/5105/2646/9104/5313/3481/2642/9370/4886/7021/229/5950
GO:0050679	positive regulation of epithelial cell proliferation	180	-0.551421	-1.26615	0.021978	0.136761	3178	tags=31%, list=17%, signal=26%	6469/441478/79805/7010/3373/1749/2247/51738/64127/10344/6662/9241/5629/652/653/367/2263/5654/187/6387/1232/6331/219736/374/89780/2064/2752/1956/7060/130497/8862/7857/9982/116844/5764/5798/3549/27202/185/4838/7476/5967/7051/2254/2246/255324/6369/7432/4485/5076/54959/283/6664/2255/383
GO:0051216	cartilage development	189	-0.554203	-1.27186	0.021978	0.136761	3441	tags=40%, list=19%, signal=33%	1303/26585/5914/8538/6781/2737/3373/2247/51738/1277/6662/6935/85301/23213/9241/81578/23314/1293/1302/8840/4920/1906/7045/652/7483/392255/55959/653/176/7482/7481/4060/81792/2261/8785/7373/5745/579/2202/340706/9464/8817/3213/1746/8313/2487/91461/130497/1301/658/4880/388585/10736/5744/51435/6423/25884/1311/389084/651/2822/3549/642658/4256/4148/7476/5212/2254/3952/8200/7227/4322/1116/4487/1280
GO:0030509	BMP signaling pathway	136	-0.577008	-1.31557	0.022022	0.136786	2855	tags=31%, list=16%, signal=26%	23213/94031/9241/4920/652/392255/23090/653/494470/168667/5654/5046/2626/2200/269/10468/2661/55273/199699/658/56963/388585/6424/6423/1311/8646/642658/170261/6425/4838/4036/8200/375567/6997/283375/50964/4487/2719/6664/286204/164656/7021
GO:0070493	thrombin-activated receptor signaling pathway	12	0.648654	1.58964	0.0220353	0.136786	1055	tags=33%, list=6%, signal=31%	6622/2811/4233/2149
GO:0016064	immunoglobulin mediated immune response	104	-0.594953	-1.34499	0.0222222	0.137759	2110	tags=15%, list=11%, signal=14%	930/100141515/721/202309/720/2302/1191/55061/718/727/722/725/10747/733/729/3263
GO:0050856	regulation of T cell receptor signaling pathway	39	0.431949	1.44801	0.022272	0.137759	3752	tags=46%, list=20%, signal=37%	3932/10385/5795/100/11006/3958/53347/1845/10892/29085/3783/56940/9840/2633/26191/10666/975/7430
GO:0006271	DNA strand elongation involved in DNA replication	17	0.57157	1.59219	0.0222725	0.137759	5722	tags=65%, list=31%, signal=45%	5425/3978/3980/4176/4172/51659/84296/5426/5983/5984/64785
GO:0008228	opsonization	10	-0.804629	-1.45086	0.0223097	0.137791	1228	tags=70%, list=7%, signal=65%	721/5806/2220/653509/3929/722/725
GO:1904385	cellular response to angiotensin	21	-0.724931	-1.4471	0.0223529	0.137791	1084	tags=24%, list=6%, signal=22%	815/88/185/55532/183
GO:0007589	body fluid secretion	79	-0.607586	-1.36436	0.0223805	0.137791	2981	tags=32%, list=16%, signal=27%	5029/6531/54843/1906/5066/171389/1131/362/9148/2697/358/8862/134/6343/4881/5021/2066/242/6863/7432/5618/1056/2255/1036/462
GO:0060351	cartilage development involved in endochondral bone morphogenesis	43	-0.659592	-1.42174	0.022412	0.137791	3441	tags=47%, list=19%, signal=38%	1303/5914/6781/1277/6662/85301/81578/1293/8785/7373/340706/8313/4880/51435/1311/3549/4148/5212/4322/1280
GO:1990573	potassium ion import across plasma membrane	43	-0.659158	-1.4208	0.022412	0.137791	2823	tags=42%, list=15%, signal=36%	51305/3772/6559/3767/3762/3757/478/479/10021/3766/3761/486/6557/477/3773/480/482/3760
GO:1904152	regulation of retrograde protein transport, ER to cytosol	13	0.641149	1.61011	0.02245	0.13786	4909	tags=69%, list=27%, signal=51%	9695/91319/55741/10956/51009/9024/51465/7327/258010
GO:0042590	antigen processing and presentation of exogenous peptide antigen via MHC class I	76	0.357972	1.31774	0.0225219	0.138137	4243	tags=45%, list=23%, signal=35%	5698/653361/6890/6891/2207/5699/3133/5695/3105/3106/3107/3134/5721/5694/5714/5715/5719/10437/9341/5685/4689/5702/8773/5708/811/5691/567/5692/5696/2923/5705/5693/10197/5690
GO:0001964	startle response	24	-0.731236	-1.49633	0.0226124	0.138447	3140	tags=58%, list=17%, signal=48%	135/5071/6531/116443/1812/2743/1813/2903/1496/84189/5179/3736/2173/9378
GO:0072576	liver morphogenesis	18	-0.755212	-1.47672	0.022673	0.138447	2748	tags=33%, list=15%, signal=28%	5629/55959/89780/5764/2267/1361
GO:0042711	maternal behavior	11	-0.812409	-1.49563	0.0227724	0.138447	2524	tags=45%, list=14%, signal=39%	552/1812/1621/1620/5021
GO:0060746	parental behavior	11	-0.812409	-1.49563	0.0227724	0.138447	2524	tags=45%, list=14%, signal=39%	552/1812/1621/1620/5021
GO:0046530	photoreceptor cell differentiation	57	-0.631965	-1.40242	0.0227979	0.138447	2926	tags=42%, list=16%, signal=36%	9742/5080/6096/6662/10083/7070/57010/8842/1258/10002/1746/1735/92211/30812/5764/3549/6101/6121/1641/4915/7054/85407/1826/23418
GO:0014823	response to activity	59	-0.622946	-1.38203	0.0228216	0.138447	1637	tags=17%, list=9%, signal=15%	10631/5764/2660/252995/3952/6770/7054/5105/183/9370
GO:0007257	activation of JUN kinase activity	39	0.43148	1.44644	0.0228323	0.138447	1942	tags=21%, list=11%, signal=18%	79444/4296/11184/5585/9064/29969/5770/79594
GO:0034310	primary alcohol catabolic process	12	-0.78558	-1.45245	0.0228426	0.138447	3085	tags=75%, list=17%, signal=62%	8644/222/6817/27284/6799/57016/27233/6783/131
GO:0007271	synaptic transmission, cholinergic	25	-0.720996	-1.47901	0.0228571	0.138447	3140	tags=60%, list=17%, signal=50%	135/8973/43/6865/1131/348/1134/3908/5913/116372/1136/66004/1146/1141/6863
GO:0072574	hepatocyte proliferation	17	-0.763898	-1.48207	0.0229192	0.138447	2748	tags=35%, list=15%, signal=30%	5629/55959/89780/5764/2267/1361
GO:0072575	epithelial cell proliferation involved in liver morphogenesis	17	-0.763898	-1.48207	0.0229192	0.138447	2748	tags=35%, list=15%, signal=30%	5629/55959/89780/5764/2267/1361
GO:1903959	regulation of anion transmembrane transport	24	-0.720363	-1.47408	0.0229358	0.138447	2313	tags=33%, list=13%, signal=29%	5243/338440/5999/7057/130497/1080/477/183
GO:0001822	kidney development	267	-0.532726	-1.22545	0.022977	0.138447	3984	tags=37%, list=22%, signal=29%	9863/56603/9788/1028/57216/3911/51301/4854/947/7849/655/51196/6385/2028/4086/2303/51804/342372/5155/5420/285/760/5914/9231/596/2737/6382/7161/6469/255743/5159/3398/5017/7010/2247/445/84662/6662/79633/23213/9241/5629/26249/7042/652/168002/55959/5125/7482/7481/1634/168667/1592/120892/54361/2263/2200/80310/153572/84623/8842/5156/359/2302/6092/4868/30812/79191/130497/388585/10736/7475/170690/8710/580…
GO:0002697	regulation of immune effector process	369	-0.513942	-1.18371	0.022977	0.138447	2226	tags=13%, list=12%, signal=11%	5654/154064/100141515/9865/721/90865/720/629/4878/2302/913/4602/57115/948/4843/1191/55061/114771/1394/27202/718/246778/909/6318/11005/3075/5169/5650/3952/2625/727/25818/3929/5225/722/725/733/1361/383/729/3263/114770/2147/335/5950/1370/7448
GO:0060348	bone development	202	-0.547611	-1.26095	0.022977	0.138447	4681	tags=42%, list=25%, signal=31%	5916/91355/650/80263/3214/144347/4146/25946/55512/23508/6474/4325/6886/4041/5364/4015/4653/56603/56034/4086/7043/1303/26585/5914/338773/284266/6781/2737/8600/6678/3638/7010/1749/51738/1277/6662/79633/85301/23213/81578/5251/1293/8840/652/389058/55959/1305/6261/2261/8785/7373/2263/4211/2200/340706/8817/2697/8313/162466/249/7066/80739/658/4880/6424/51435/6423/60676/1311/10234/3549/642658/4057/4148/5…
GO:0030007	cellular potassium ion homeostasis	11	-0.793907	-1.46156	0.0230769	0.138561	1410	tags=45%, list=8%, signal=42%	478/479/477/480/482
GO:0042953	lipoprotein transport	11	-0.793794	-1.46136	0.0230769	0.138561	72	tags=27%, list=0%, signal=27%	948/344/338
GO:0044872	lipoprotein localization	11	-0.793794	-1.46136	0.0230769	0.138561	72	tags=27%, list=0%, signal=27%	948/344/338
GO:0072216	positive regulation of metanephros development	13	-0.806836	-1.50532	0.023288	0.139654	858	tags=31%, list=5%, signal=29%	5979/5076/7490/9370
GO:0060291	long-term synaptic potentiation	80	-0.605502	-1.36224	0.023374	0.139654	3140	tags=44%, list=17%, signal=36%	135/4900/2048/177/4776/10858/1812/348/2904/1395/6543/91683/50944/5649/134/1394/2905/5764/794/26045/6547/54413/1813/2903/7101/11170/23237/4915/25769/1524/10590/6616/793/347730/7143
GO:0036314	response to sterol	28	-0.698674	-1.45023	0.0234899	0.139654	1142	tags=18%, list=6%, signal=17%	3638/3624/2822/23209/2155
GO:2000780	negative regulation of double-strand break repair	31	0.487852	1.54208	0.023531	0.139654	4149	tags=32%, list=23%, signal=25%	8091/7291/10459/24144/10721/2187/78996/79000/23347/4968
GO:1901678	iron coordination entity transport	11	-0.808054	-1.48761	0.0235644	0.139654	1052	tags=18%, list=6%, signal=17%	4057/3263
GO:0015800	acidic amino acid transport	60	-0.63041	-1.40065	0.0235823	0.139654	1825	tags=28%, list=10%, signal=26%	2917/57030/8499/134/6857/27165/6511/6512/3766/6507/83733/4915/6616/477/6529/6506/7200
GO:0000050	urea cycle	10	-0.800304	-1.44306	0.023622	0.139654	217	tags=50%, list=1%, signal=49%	445/1050/1373/5009/383
GO:0002713	negative regulation of B cell mediated immunity	10	-0.802133	-1.44636	0.023622	0.139654	1846	tags=30%, list=10%, signal=27%	2302/722/725
GO:0002890	negative regulation of immunoglobulin mediated immune response	10	-0.802133	-1.44636	0.023622	0.139654	1846	tags=30%, list=10%, signal=27%	2302/722/725
GO:0006068	ethanol catabolic process	10	-0.801686	-1.44555	0.023622	0.139654	2648	tags=70%, list=14%, signal=60%	222/6817/27284/6799/27233/6783/131
GO:0033605	positive regulation of catecholamine secretion	10	-0.800496	-1.44341	0.023622	0.139654	2185	tags=50%, list=12%, signal=44%	6387/3745/5021/1141/7432
GO:0099151	regulation of postsynaptic density assembly	10	-0.799542	-1.44169	0.023622	0.139654	1070	tags=50%, list=6%, signal=47%	5789/26045/4916/9378/347730
GO:2000574	regulation of microtubule motor activity	10	-0.79821	-1.43928	0.023622	0.139654	897	tags=20%, list=5%, signal=19%	387885/348807
GO:0000076	DNA replication checkpoint	16	0.60557	1.66724	0.0236398	0.139654	2959	tags=44%, list=16%, signal=37%	8318/63967/4998/990/81620/90381/54962
GO:0032924	activin receptor signaling pathway	36	-0.67311	-1.43439	0.0236814	0.139739	4337	tags=50%, list=24%, signal=38%	94/91/4092/151449/9863/6469/168002/392255/3624/10468/8928/199699/1761/4838/3547/2254/6997/2255
GO:0090382	phagosome maturation	43	0.41052	1.38999	0.0237318	0.139785	2513	tags=44%, list=14%, signal=38%	8406/5027/23682/526/50617/245972/11151/10981/535/56833/527/155066/10497/9296/4647/9114/533/529/9550
GO:0110110	positive regulation of animal organ morphogenesis	75	-0.61487	-1.3827	0.0237437	0.139785	3748	tags=44%, list=20%, signal=35%	947/7849/655/51804/2252/7421/6662/9241/1906/7042/652/367/7482/10818/54361/2263/219736/9464/89780/6092/10117/30812/7475/5764/140628/2246/3975/2625/5076/401138/2255/183/7490
GO:0002793	positive regulation of peptide secretion	257	-0.534845	-1.22998	0.023976	0.140543	3322	tags=27%, list=18%, signal=22%	55107/7124/7447/2696/2852/8600/135/8938/51738/64127/114899/22861/55638/177/43/57393/640/54209/7042/9173/55540/94121/120892/27063/90865/2697/3651/222546/2752/1956/10631/4023/114900/8862/654346/7273/3814/134/2645/1080/79679/6343/116/2822/6279/3552/6288/199713/284194/1813/2922/8736/5319/2625/283/8431/4826/727/2266/5005/260434/169026/9971/2244/5004/7036/2243/7200/5950
GO:0010001	glial cell differentiation	204	-0.54746	-1.26091	0.023976	0.140543	3303	tags=29%, list=18%, signal=24%	118738/7124/2737/7161/6469/135/3398/6662/177/1840/9241/10100/4920/54587/54209/146433/3400/1812/8521/3572/3908/7732/1746/2840/2064/26011/30812/1956/388585/3084/1191/5649/5803/6657/84630/10675/5764/6279/4821/6547/54413/7101/4137/3766/7080/4915/92737/4099/5076/4916/116448/6900/6664/2255/9283/429/2596/4504/2147/7448
GO:0046890	regulation of lipid biosynthetic process	174	-0.551424	-1.26622	0.023976	0.140543	1142	tags=10%, list=6%, signal=10%	2822/718/2246/3952/6770/145264/340895/51085/9965/341/7069/9104/345275/9971/344/9370/338/335
GO:0001658	branching involved in ureteric bud morphogenesis	55	-0.632008	-1.3971	0.0239833	0.140543	3290	tags=42%, list=18%, signal=34%	596/2737/6469/255743/2247/6662/79633/9241/652/7482/54361/30812/10736/7475/170690/5087/80000/2246/3975/5076/2719/183/7490
GO:0010996	response to auditory stimulus	24	-0.710388	-1.45367	0.0240826	0.140543	1870	tags=29%, list=10%, signal=26%	9379/5764/1813/6507/84189/3746/9378
GO:0021680	cerebellar Purkinje cell layer development	24	-0.709739	-1.45234	0.0240826	0.140543	1405	tags=21%, list=8%, signal=19%	23017/51286/3975/124925/23544
GO:1990776	response to angiotensin	24	-0.709457	-1.45176	0.0240826	0.140543	2263	tags=25%, list=12%, signal=22%	815/5743/88/185/55532/183
GO:0042268	regulation of cytolysis	12	-0.785119	-1.4516	0.0241117	0.140543	1633	tags=58%, list=9%, signal=53%	3853/57115/5196/114771/2822/5076/3929
GO:0072028	nephron morphogenesis	74	-0.619504	-1.39393	0.0241188	0.140543	3290	tags=47%, list=18%, signal=39%	7849/655/51804/596/2737/6469/255743/5159/2247/6662/79633/9241/26249/652/7482/7481/54361/153572/30812/79191/130497/388585/10736/7475/170690/5087/80000/2246/3975/2625/79192/5076/2719/183/7490
GO:0032481	positive regulation of type I interferon production	75	0.36445	1.33288	0.0242312	0.140943	3348	tags=24%, list=18%, signal=20%	5435/10622/4321/3428/661/51311/5434/3659/171568/1499/6772/56919/4791/5441/10211/51428/2547/26191
GO:0060349	bone morphogenesis	104	-0.593729	-1.34222	0.0242424	0.140943	3441	tags=40%, list=19%, signal=33%	1303/5914/338773/6781/2737/3638/7010/1749/1277/6662/85301/81578/1293/652/389058/1305/2261/8785/7373/2263/340706/8817/8313/162466/249/658/4880/6424/51435/6423/60676/1311/3549/642658/4057/4148/5212/4322/5075/1044/4487/1280
GO:1901890	positive regulation of cell junction assembly	90	-0.597757	-1.34736	0.0243161	0.140997	2540	tags=32%, list=14%, signal=28%	347902/57633/7070/5789/54361/2049/2047/576/27286/575/94030/79953/40/59272/26045/54413/7476/577/5021/84189/4915/147381/4916/54674/9378/347730/22865/64084/183
GO:1901381	positive regulation of potassium ion transmembrane transport	36	-0.68468	-1.45904	0.0243519	0.140997	2624	tags=42%, list=14%, signal=36%	54209/9722/3784/51083/8811/4878/3757/88/23630/1908/3747/3736/3746/219527/482
GO:0051657	maintenance of organelle location	11	-0.807289	-1.4862	0.0243565	0.140997	43	tags=27%, list=0%, signal=27%	29899/487/213
GO:0009798	axis specification	74	-0.606923	-1.36562	0.0243902	0.140997	3285	tags=32%, list=18%, signal=27%	7473/6781/6469/441478/3170/652/10818/4188/5046/23493/163589/80319/10736/7475/6496/4838/7476/1045/3975/6997/1044/2719/2255/7490
GO:1904894	positive regulation of receptor signaling pathway via STAT	73	-0.608841	-1.3697	0.0244151	0.140997	2814	tags=41%, list=15%, signal=35%	3592/5175/3606/3586/5753/3569/85480/1437/51561/64109/1489/7124/3593/149233/2690/2261/8784/3572/8995/2056/388585/9244/2322/2066/3952/5618/50604/183/3263/2147
GO:0009068	aspartate family amino acid catabolic process	23	-0.719207	-1.45316	0.0244186	0.140997	1611	tags=22%, list=9%, signal=20%	8528/10247/10993/4143/51268
GO:0035640	exploration behavior	20	-0.73467	-1.46695	0.0244755	0.140997	2278	tags=50%, list=12%, signal=44%	348/120892/2571/57338/1394/1620/5179/57282/347730/7143
GO:0061213	positive regulation of mesonephros development	20	-0.734774	-1.46715	0.0244755	0.140997	541	tags=55%, list=3%, signal=53%	7849/51804/6662/9241/7482/30812/3975/2625/5076/183/7490
GO:0045923	positive regulation of fatty acid metabolic process	30	-0.689134	-1.44058	0.0244989	0.140997	375	tags=23%, list=2%, signal=23%	552/5743/51085/2168/9104/344/9370
GO:0045652	regulation of megakaryocyte differentiation	65	0.344226	1.26167	0.0246677	0.14181	1837	tags=23%, list=10%, signal=21%	8367/8365/8351/2811/121504/2624/8294/85477/8850/8013/8370/8360/8357/10519/8353
GO:0019400	alditol metabolic process	21	-0.722972	-1.44319	0.0247059	0.14187	628	tags=29%, list=3%, signal=28%	84649/80168/3952/346606/5105/27329
GO:0021936	regulation of cerebellar granule cell precursor proliferation	10	-0.820946	-1.48028	0.0247421	0.14192	959	tags=60%, list=5%, signal=57%	64211/6469/51286/3975/6532/9283
GO:0000422	autophagy of mitochondrion	74	0.366096	1.32686	0.0248327	0.142112	4504	tags=42%, list=25%, signal=32%	10645/55062/25793/2629/706/54543/23400/10193/11337/79594/23130/11315/664/11140/6721/1513/23710/79065/27429/26100/9776/57103/51024/9927/81631/1459/65018/2017/3064/55626/11152
GO:0061726	mitochondrion disassembly	74	0.366096	1.32686	0.0248327	0.142112	4504	tags=42%, list=25%, signal=32%	10645/55062/25793/2629/706/54543/23400/10193/11337/79594/23130/11315/664/11140/6721/1513/23710/79065/27429/26100/9776/57103/51024/9927/81631/1459/65018/2017/3064/55626/11152
GO:0010669	epithelial structure maintenance	26	-0.709268	-1.46496	0.0248588	0.142112	1866	tags=50%, list=10%, signal=45%	7099/143689/9079/64127/6662/64081/4588/7032/12/4583/7031/340547/5950
GO:0021700	developmental maturation	254	-0.534055	-1.22787	0.024975	0.14246	2941	tags=27%, list=16%, signal=23%	55638/79633/27289/116369/4776/1050/347688/7042/6690/1235/6261/2261/120892/5745/51083/23114/9148/2697/2056/163589/8941/30812/162466/4897/57030/59277/50944/2046/1672/342035/4747/4880/388585/440712/158866/5649/1080/5798/3549/2069/23025/4057/6954/718/10265/51286/6496/11005/5979/10882/577/5972/3952/2625/1524/63827/5076/283/83853/9378/6900/5241/124925/1811/2266/23544/55908/429
GO:0045137	development of primary sexual characteristics	195	-0.547808	-1.26004	0.024975	0.14246	2646	tags=24%, list=14%, signal=21%	3020/7042/367/7482/3624/54361/2626/269/6586/2661/2697/5156/6092/23414/1588/30812/1299/2620/130497/658/23639/56159/1602/6423/5806/116/117154/5798/642658/2069/1761/10265/89766/56956/7080/5972/2254/2099/3952/6770/4036/2625/283/5241/117/7490/174
GO:0034143	regulation of toll-like receptor 4 signaling pathway	19	-0.744869	-1.4654	0.0250298	0.142614	1052	tags=21%, list=6%, signal=20%	11027/4057/92747/3929
GO:0036159	inner dynein arm assembly	13	-0.772579	-1.44141	0.0251889	0.142738	2878	tags=69%, list=16%, signal=58%	56171/126820/7802/23639/27285/51364/387885/123872/348807
GO:0060134	prepulse inhibition	13	-0.769616	-1.43588	0.0251889	0.142738	3140	tags=62%, list=17%, signal=51%	135/6531/116443/1812/1813/1496/2173/9378
GO:2000345	regulation of hepatocyte proliferation	13	-0.772842	-1.4419	0.0251889	0.142738	2505	tags=31%, list=14%, signal=27%	55959/89780/5764/1361
GO:0045841	negative regulation of mitotic metaphase/anaphase transition	36	0.465904	1.45643	0.0252101	0.142738	3822	tags=36%, list=21%, signal=29%	8379/10459/9212/81620/472/891/84861/701/991/699/10403/5347/25906
GO:1902100	negative regulation of metaphase/anaphase transition of cell cycle	36	0.465904	1.45643	0.0252101	0.142738	3822	tags=36%, list=21%, signal=29%	8379/10459/9212/81620/472/891/84861/701/991/699/10403/5347/25906
GO:0046631	alpha-beta T cell activation	133	0.306964	1.18026	0.0252184	0.142738	1921	tags=25%, list=10%, signal=22%	3662/384/3707/8764/864/3458/7704/26279/257101/8320/51176/7535/3594/100/30009/916/114836/60437/64926/3142/84695/6375/54440/8943/3133/4063/10892/64218/3659/84807/3702/2475/159296
GO:0050764	regulation of phagocytosis	90	-0.596144	-1.34373	0.0253293	0.142907	2319	tags=20%, list=13%, signal=18%	11031/2621/721/720/23208/948/246/5806/718/6441/566/729238/653509/722/725/9370/197/335
GO:0010866	regulation of triglyceride biosynthetic process	17	-0.760337	-1.47516	0.0253317	0.142907	1142	tags=29%, list=6%, signal=28%	84649/2822/718/7069/9104
GO:0017085	response to insecticide	17	-0.762663	-1.47967	0.0253317	0.142907	1782	tags=35%, list=10%, signal=32%	1644/6327/4747/6770/7054/1543
GO:0045104	intermediate filament cytoskeleton organization	45	-0.650503	-1.41383	0.0254507	0.143263	1882	tags=22%, list=10%, signal=20%	3872/4741/4747/7062/3868/286887/5630/3861/3857/2670
GO:0045214	sarcomere organization	45	-0.650977	-1.41486	0.0254507	0.143263	3776	tags=60%, list=21%, signal=48%	7168/1466/51804/4621/3880/84033/7138/5629/1906/9172/91807/27063/8557/7139/10753/7273/127294/58529/10324/88/844/845/84665/8736/4606/7140/79933
GO:0034384	high-density lipoprotein particle clearance	11	-0.804474	-1.48102	0.0255446	0.143634	1142	tags=45%, list=6%, signal=43%	348/2822/55937/344/335
GO:0045109	intermediate filament organization	20	-0.732848	-1.46331	0.025641	0.144009	1882	tags=50%, list=10%, signal=45%	6469/83481/54474/3872/4741/4747/7062/3861/3857/2670
GO:0060415	muscle tissue morphogenesis	71	-0.611195	-1.36801	0.0256674	0.144009	4608	tags=63%, list=25%, signal=48%	650/1482/7474/6474/4638/4092/283284/5318/7472/57216/7168/1832/6899/57493/2303/8321/1901/2535/57057/140706/9241/5629/7042/1281/9172/2263/27063/23493/8928/8557/23414/7134/7139/1301/3084/7273/85366/127294/7135/4634/4625/8736/4606/4036/70
GO:0014067	negative regulation of phosphatidylinositol 3-kinase signaling	12	0.637481	1.56226	0.0258399	0.144818	724	tags=25%, list=4%, signal=24%	5270/10385/7291
GO:0006925	inflammatory cell apoptotic process	21	0.527117	1.49733	0.0259311	0.145171	874	tags=24%, list=5%, signal=23%	5293/3707/1514/356/6352
GO:0072210	metanephric nephron development	37	-0.66456	-1.41448	0.025974	0.145253	2242	tags=38%, list=12%, signal=33%	54361/153572/5156/30812/130497/388585/10736/5979/3975/79192/5076/7490/9370/7021
GO:0015809	arginine transport	10	-0.817517	-1.4741	0.0260109	0.145301	1359	tags=30%, list=7%, signal=28%	6542/183/383
GO:0035725	sodium ion transmembrane transport	128	-0.57881	-1.31568	0.0260521	0.145373	3373	tags=38%, list=18%, signal=31%	142680/6339/57657/6558/64078/6337/6326/6559/285335/9368/389015/6340/259232/6329/6331/1815/57419/6338/6543/57030/6327/130497/6550/53828/11280/478/284525/4842/53826/5348/40/479/53822/10021/55800/6547/29850/486/25769/6323/55515/6557/6328/477/480/10050/482/8647
GO:0000028	ribosomal small subunit assembly	18	0.558202	1.54244	0.0263143	0.146677	6662	tags=83%, list=36%, signal=53%	27341/51065/64963/6209/102724159/91695/6223/6193/6234/5822/3921/6204/29777/51081/26284
GO:1901984	negative regulation of protein acetylation	20	0.557358	1.55257	0.0263503	0.146718	2511	tags=30%, list=14%, signal=26%	6622/7291/26155/28999/55011/11315
GO:0009164	nucleoside catabolic process	30	-0.699041	-1.46129	0.026495	0.147205	1629	tags=17%, list=9%, signal=15%	200315/10930/151531/1807/51733
GO:0070207	protein homotrimerization	31	-0.701857	-1.47016	0.026495	0.147205	265	tags=13%, list=1%, signal=13%	55600/6506/5009/383
GO:0031167	rRNA methylation	26	0.531674	1.6088	0.0265479	0.147339	5188	tags=62%, list=28%, signal=44%	345630/55178/55695/260294/79066/117246/79922/130916/51106/51504/114049/10436/29960/4839/2091/155400
GO:0010960	magnesium ion homeostasis	11	-0.80309	-1.47847	0.0267327	0.148204	1698	tags=36%, list=9%, signal=33%	1956/1908/3736/7021
GO:0033500	carbohydrate homeostasis	214	-0.541016	-1.24675	0.026973	0.149054	3663	tags=27%, list=20%, signal=22%	5106/5443/100132074/5080/26137/3480/4828/55107/7447/143686/2852/8938/51738/55638/177/3170/6927/1050/57393/8840/3767/5295/56670/2264/2621/10804/2626/3171/3651/222546/3172/150/3488/6755/3745/1215/648791/1268/1621/2645/1080/2822/5798/2901/3953/3952/6770/7054/5076/51085/5105/2646/2642/9971/9370/1361/7021/5950
GO:0055074	calcium ion homeostasis	419	-0.509168	-1.17339	0.026973	0.149054	3695	tags=32%, list=20%, signal=26%	3577/10800/51196/10874/1901/540/10268/54757/9651/9914/1003/7421/4828/783/596/799/7504/6781/255061/2696/2852/2843/8600/5732/22953/2247/51738/4923/3709/776/1909/9256/1233/1906/2859/10563/1235/552/2846/7222/7070/1903/148/6261/3351/1812/930/2847/348/57402/5745/3356/187/775/6387/9365/5729/1232/5731/2151/2904/1815/57007/8811/5158/2697/84239/9001/1258/728215/2056/773/5156/57419/64072/3270/6543/2840/1907…
GO:2000027	regulation of animal organ morphogenesis	239	-0.537359	-1.23714	0.026973	0.149054	3993	tags=31%, list=22%, signal=25%	84133/9863/7472/115908/57216/947/7849/655/6899/2303/8321/51804/2535/3082/2252/7421/26585/80320/7124/596/6469/144165/6662/166336/80326/6910/23213/9241/4920/1906/7042/652/55959/4982/367/7482/7481/10818/9620/2239/54361/2263/219736/9464/58524/84870/89780/6092/1735/10117/30812/64321/59277/10736/7475/6423/54829/5764/55966/140628/7476/2246/2099/3975/2625/5076/85407/401138/4487/2719/2255/1101/183/7490/13…
GO:0006633	fatty acid biosynthetic process	136	-0.568047	-1.29514	0.027027	0.149186	1804	tags=16%, list=10%, signal=15%	5742/1907/4023/27306/283985/246/79966/242/5319/51085/1543/3990/341/1576/9104/1565/54988/1571/344/9370/1559/1558
GO:0016266	O-glycan processing	56	-0.625253	-1.38478	0.0270552	0.149186	1510	tags=41%, list=8%, signal=38%	51301/8693/55568/11227/143662/4582/374907/727936/10164/11226/727897/4588/4584/192134/4586/117248/394263/94025/50614/4583/140453/10071/118430
GO:2000310	regulation of NMDA receptor activity	34	-0.676798	-1.43612	0.027115	0.149356	2402	tags=35%, list=13%, signal=31%	1393/2904/254263/4747/5649/88/54413/2903/2892/2893/2890/2891
GO:0003009	skeletal muscle contraction	37	-0.67636	-1.43959	0.0271615	0.149452	3252	tags=49%, list=18%, signal=40%	4621/6769/7138/246329/4151/1134/6329/8557/7134/7139/124093/7136/844/6547/4625/7125/7140/342667
GO:0046916	cellular transition metal ion homeostasis	97	-0.597575	-1.35238	0.0272177	0.149601	1880	tags=16%, list=10%, signal=15%	30061/9843/25800/79901/6280/6279/23627/4057/57817/283375/169026/164656/7036/4504/7018/3263
GO:1902170	cellular response to reactive nitrogen species	19	-0.738672	-1.45321	0.0274136	0.150172	509	tags=21%, list=3%, signal=20%	358/3747/1800/4504
GO:0007263	nitric oxide mediated signal transduction	25	-0.703737	-1.44361	0.0274286	0.150172	2552	tags=52%, list=14%, signal=45%	2977/6690/9722/348/7057/3651/1956/948/4843/4842/389692/3747/183
GO:0055017	cardiac muscle tissue growth	80	-0.602692	-1.35592	0.027439	0.150172	3664	tags=40%, list=20%, signal=32%	57493/693175/4086/2303/1901/7161/57057/2627/2247/140706/6910/9241/1906/7042/148/5999/2263/2626/4211/23493/2697/4878/65009/23414/26011/221476/3776/57817/2254/2066/183/5950
GO:0072088	nephron epithelium morphogenesis	72	-0.623615	-1.39863	0.0274559	0.150172	3290	tags=43%, list=18%, signal=35%	596/2737/6469/255743/2247/6662/79633/9241/26249/652/7482/7481/54361/153572/30812/79191/130497/388585/10736/7475/170690/5087/80000/2246/3975/2625/79192/5076/2719/183/7490
GO:0046621	negative regulation of organ growth	32	-0.681527	-1.43206	0.0274725	0.150172	3215	tags=31%, list=17%, signal=26%	7161/6910/9241/5999/4211/2697/221476/3776/6532/5950
GO:0070828	heterochromatin organization	62	0.371359	1.32778	0.0274972	0.150172	2228	tags=23%, list=12%, signal=20%	8367/8365/8351/121504/8091/8294/8370/8360/8357/4524/53615/8353/3159/51548
GO:0050909	sensory perception of taste	36	-0.682975	-1.45541	0.0275352	0.15022	3927	tags=53%, list=21%, signal=42%	54429/5284/342372/6339/50832/22953/6337/338557/83756/6340/6338/948/40/1470/1469/29850/4025/1472/5304
GO:0042273	ribosomal large subunit biogenesis	69	0.359991	1.33249	0.0276816	0.150741	5564	tags=51%, list=30%, signal=36%	55003/23481/56342/26155/54475/22907/51154/79707/55052/4809/6154/6122/54663/6838/29997/23246/117246/6135/9875/10969/55794/6152/14/11224/90441/6130/51491/65003/55759/4839/51388/55153/9326/55651/55027
GO:0047484	regulation of response to osmotic stress	13	-0.766035	-1.4292	0.0277078	0.150741	2313	tags=38%, list=13%, signal=34%	5243/5743/2056/80303/23209
GO:0042795	snRNA transcription by RNA polymerase II	70	0.367817	1.39141	0.0277388	0.150741	4059	tags=27%, list=22%, signal=21%	5435/6618/5434/26173/55756/55174/6884/80789/5441/54973/6621/2962/5452/22936/6878/51593/2959/129685/5430
GO:0003044	regulation of systemic arterial blood pressure mediated by a chemical signal	43	-0.649954	-1.40096	0.0277481	0.150741	2662	tags=42%, list=14%, signal=36%	1906/552/5125/148/56670/3291/10699/1907/1215/59272/185/5021/5972/1908/1066/27035/183/5345
GO:0035458	cellular response to interferon-beta	15	0.620975	1.65207	0.027854	0.151046	2529	tags=47%, list=14%, signal=40%	149628/9447/3428/3659/51079/6772/997
GO:0009262	deoxyribonucleotide metabolic process	34	0.444837	1.40453	0.0278741	0.151046	2925	tags=32%, list=16%, signal=27%	100/26289/56953/7298/4521/252969/1841/9519/6241/79873/1716
GO:0060420	regulation of heart growth	63	-0.615512	-1.37266	0.0278926	0.151046	3215	tags=33%, list=17%, signal=28%	7161/57057/2627/2247/6910/9241/5629/1906/5999/2263/4211/23493/2697/23414/221476/3776/57817/2254/2066/7490/5950
GO:0009071	serine family amino acid catabolic process	13	-0.800984	-1.4944	0.0281479	0.152268	516	tags=46%, list=3%, signal=45%	51380/275/2731/10993/1036/189
GO:0019724	B cell mediated immunity	107	-0.583381	-1.31986	0.0282543	0.152683	2110	tags=15%, list=11%, signal=13%	930/100141515/721/202309/720/2302/1191/55061/718/727/722/725/10747/733/729/3263
GO:0001657	ureteric bud development	92	-0.58902	-1.32913	0.0283688	0.15314	3710	tags=46%, list=20%, signal=37%	7849/655/6385/4086/2303/51804/5914/596/2737/6382/6469/255743/2247/6662/79633/9241/652/7482/7481/168667/54361/2263/2302/6092/30812/130497/10736/7475/170690/5087/5979/80000/9244/2246/3975/2625/5076/6492/793/2719/183/7490
GO:0071731	response to nitric oxide	19	-0.737368	-1.45064	0.0286055	0.154256	509	tags=21%, list=3%, signal=20%	358/3747/1800/4504
GO:0042744	hydrogen peroxide catabolic process	24	-0.703615	-1.43981	0.0286697	0.154278	1627	tags=33%, list=9%, signal=30%	50506/2878/3043/3039/4025/137902/4504/3240
GO:1903792	negative regulation of anion transport	24	-0.704292	-1.44119	0.0286697	0.154278	2650	tags=46%, list=14%, signal=39%	2564/338440/5999/7057/2917/130497/6424/134/3952/8529/7200
GO:0070278	extracellular matrix constituent secretion	11	-0.801732	-1.47597	0.0287128	0.154348	118	tags=36%, list=1%, signal=36%	1490/28984/183/1361
GO:0014855	striated muscle cell proliferation	63	-0.613632	-1.36847	0.0289256	0.154431	3653	tags=38%, list=20%, signal=31%	693175/4086/2303/7161/57057/6469/2627/2247/6910/9241/7042/2263/4211/23493/2047/2697/65009/23414/26011/3776/2660/2254/2066/5950
GO:0003002	regionalization	314	-0.519211	-1.1966	0.028971	0.154431	4804	tags=42%, list=26%, signal=32%	3236/79600/3222/64388/3215/5916/91355/6604/650/3214/1482/3202/9935/2114/55764/3684/1952/7474/4091/6495/3237/648/58495/4041/2260/3955/64399/79365/7472/56603/6911/2294/57216/389549/8553/4222/7849/6899/2303/9742/3087/3218/5080/26585/50937/7473/10683/2737/57057/6469/441478/3199/3219/6405/2637/3212/3170/9241/3204/4920/1906/6939/652/57453/5125/367/7482/10818/9620/4188/2263/5046/2626/153572/7832/58524/2…
GO:0042593	glucose homeostasis	213	-0.541876	-1.24851	0.028971	0.154431	3663	tags=27%, list=20%, signal=22%	5106/5443/100132074/5080/26137/3480/4828/55107/7447/143686/2852/8938/51738/55638/177/3170/6927/1050/57393/8840/3767/5295/56670/2264/2621/10804/2626/3171/3651/222546/3172/150/3488/6755/3745/1215/648791/1268/1621/2645/1080/2822/5798/2901/3953/3952/6770/7054/5076/51085/5105/2646/2642/9971/9370/1361/7021/5950
GO:0050708	regulation of protein secretion	416	-0.509134	-1.17335	0.028971	0.154431	3973	tags=31%, list=22%, signal=25%	9734/3569/85480/11027/81793/18/7292/64109/111/947/7099/55612/406/693175/10874/4345/7043/91543/11069/80223/23586/28984/7850/152/55107/26251/7124/7447/2696/2852/135/8938/5071/2702/51738/64127/3709/114899/22861/55638/338557/776/177/2615/43/3170/54474/57393/8840/640/3767/54209/80725/5066/7042/9173/55540/94121/2621/348/120892/775/27063/440068/1815/90865/2697/7100/3651/773/23208/222546/3172/2752/150/19…
GO:0051480	regulation of cytosolic calcium ion concentration	314	-0.519564	-1.19741	0.028971	0.154431	3290	tags=32%, list=18%, signal=27%	596/799/255061/2696/2852/2843/5732/22953/2247/51738/4923/3709/776/1909/9256/1233/1906/2859/10563/1235/552/2846/7222/7070/1903/148/6261/3351/1812/930/2847/5745/3356/187/775/5729/1232/5731/2151/2904/57007/8811/5158/2697/9001/1258/728215/2056/773/5156/64072/3270/2840/1907/387129/130733/6869/57338/3741/948/3814/134/4842/1268/6263/2785/8989/1394/2905/60675/2740/116/794/6288/27202/185/797/844/845/6547/…
GO:0055001	muscle cell development	156	-0.561965	-1.28533	0.028971	0.154431	3290	tags=37%, list=18%, signal=31%	596/7504/4621/3880/6382/5159/2318/22953/84033/10266/7138/246329/4776/5629/1906/57462/652/7111/148/6261/9172/91807/5999/2626/27063/115701/23493/8557/4878/5156/84700/7139/10529/9254/10753/221476/7273/127294/1311/58529/10324/4892/88/4703/844/845/84665/56203/124857/57817/8736/4606/70/92737/7140/79933/58/183
GO:0060537	muscle tissue development	356	-0.512846	-1.18092	0.028971	0.154431	4040	tags=37%, list=22%, signal=29%	57538/4015/5318/5350/7472/56603/9734/57158/7168/1832/6665/655/6899/57493/406/693175/1466/4086/2303/51804/1901/26585/5914/50937/596/56261/7504/7161/57057/6469/5159/2627/3398/22953/2247/2702/140706/93649/6662/7093/6910/246329/9241/57496/5629/26287/1906/57462/7042/652/1281/653/1634/10818/148/26576/6261/9172/91807/5999/1134/2263/2626/27063/4211/2139/10472/7832/115701/9148/23493/2047/8928/8557/2697/48…
GO:0006081	cellular aldehyde metabolic process	57	-0.624572	-1.38601	0.0290155	0.154431	1235	tags=26%, list=7%, signal=25%	8644/27122/112817/653/54361/83875/132158/1645/218/6121/3795/64577/127/229/189
GO:0007606	sensory perception of chemical stimulus	66	-0.613105	-1.36533	0.0290155	0.154431	3562	tags=41%, list=19%, signal=33%	342372/2535/6339/50832/22953/6337/6531/338557/83756/6340/1258/6338/948/40/8989/4685/1470/1469/29850/1813/4025/158046/1262/29991/1472/29989/5304
GO:1904064	positive regulation of cation transmembrane transport	133	-0.57052	-1.29964	0.029029	0.154431	3580	tags=37%, list=19%, signal=30%	2745/10268/3753/2631/783/799/2852/4923/6769/2048/246329/3767/54209/7070/9722/1812/930/187/3784/51083/1815/8811/9001/4878/57165/3757/387129/5649/4842/5348/27092/88/2259/844/10345/54413/23630/23237/1908/3747/3736/3746/342667/219527/482/5174/9104/183/2147
GO:1902042	negative regulation of extrinsic apoptotic signaling pathway via death domain receptors	36	-0.667883	-1.42325	0.0290635	0.154454	1415	tags=14%, list=8%, signal=13%	6423/23017/2266/2244/2243
GO:0032414	positive regulation of ion transmembrane transporter activity	97	-0.595443	-1.34756	0.0292339	0.155199	3003	tags=32%, list=16%, signal=27%	4923/6769/2048/246329/3767/54209/9722/5243/51083/1815/8811/9001/4878/5649/27092/1080/88/2259/844/10345/54413/23237/3747/3736/3746/342667/219527/3359/482/5174/9104
GO:0010824	regulation of centrosome duplication	43	0.400302	1.3554	0.029333	0.155564	1987	tags=14%, list=11%, signal=12%	118611/100653515/8850/54461/22994/25886
GO:0009620	response to fungus	33	-0.673379	-1.42345	0.0294438	0.155977	1556	tags=33%, list=8%, signal=31%	6280/5806/5919/6279/4057/57817/84659/1113/6283/26525/383
GO:0002027	regulation of heart rate	86	-0.597127	-1.3443	0.0294715	0.155977	4147	tags=50%, list=23%, signal=39%	9992/6330/5318/5350/7168/3759/1832/10874/3753/783/6505/2702/776/1906/3762/552/148/9722/5999/775/80763/3784/6331/23493/4878/3270/1907/3757/6327/3741/10021/10265/845/55800/1813/29119/4625/23630/6863/1908/23704/3760/183
GO:1903599	positive regulation of autophagy of mitochondrion	20	0.552658	1.53948	0.0299318	0.157262	4342	tags=55%, list=24%, signal=42%	10645/25793/2629/54543/79594/11315/664/11140/9927/65018/3064
GO:0010959	regulation of metal ion transport	353	-0.512634	-1.18009	0.02997	0.157262	3544	tags=32%, list=19%, signal=27%	2745/5155/10268/3753/2631/9914/774/161253/783/3755/596/799/6781/2852/27075/5159/2916/135/22953/4923/57628/6769/776/80333/246329/2859/151651/54209/6690/9368/7222/7070/9722/1812/930/2847/2273/6236/117532/3788/5999/815/3356/187/775/6387/5743/3784/51083/1272/6331/1815/8811/154215/2697/9001/2056/4878/116444/3270/3208/57165/3757/150/283518/387129/6327/130497/57338/53828/3741/134/4842/53826/5348/2645/53…
GO:0032869	cellular response to insulin stimulus	202	-0.544513	-1.25382	0.02997	0.157262	1831	tags=12%, list=10%, signal=11%	1154/2888/3645/4023/375704/2645/5919/2822/2660/534/493829/6121/3952/6770/5319/145264/5105/525/5313/3481/183/9971/9370/3484/197
GO:0050730	regulation of peptidyl-tyrosine phosphorylation	232	-0.536392	-1.23495	0.02997	0.157262	2624	tags=21%, list=14%, signal=18%	54209/149233/80725/6690/2690/7070/148/2261/2621/3356/8784/285489/3572/80310/389658/1272/9148/8995/374/2056/1440/89780/4908/150/1956/7060/388585/948/3084/6423/5649/134/116379/2069/9244/2322/2066/285016/255324/3952/4915/6997/2255/50604/3481/183/9370/3263/7448
GO:0000466	maturation of 5.8S rRNA from tricistronic rRNA transcript (SSU-rRNA, 5.8S rRNA, LSU-rRNA)	22	0.501582	1.43271	0.0299732	0.157262	4788	tags=64%, list=26%, signal=47%	23481/79707/5394/90459/23246/117246/65095/5393/9875/23016/23404/27340/8602/55759
GO:0006625	protein targeting to peroxisome	65	-0.614783	-1.36843	0.0300207	0.157262	2134	tags=14%, list=12%, signal=12%	5264/8309/11001/8528/4843/51555/570/51268/189
GO:0071300	cellular response to retinoic acid	65	-0.61379	-1.36622	0.0300207	0.157262	3996	tags=43%, list=22%, signal=34%	5753/7472/56603/2707/6899/6096/5914/7473/3199/1277/6662/11211/7483/7481/2263/89780/4602/358/130497/7475/1620/5979/3952/5076/4916/6532/5105/57795
GO:0072171	mesonephric tubule morphogenesis	62	-0.612866	-1.36409	0.0300207	0.157262	3290	tags=42%, list=18%, signal=35%	596/2737/6469/255743/2247/6662/79633/9241/652/7482/7481/54361/30812/130497/10736/7475/170690/5087/80000/2246/3975/2625/5076/2719/183/7490
GO:0072662	protein localization to peroxisome	65	-0.614783	-1.36843	0.0300207	0.157262	2134	tags=14%, list=12%, signal=12%	5264/8309/11001/8528/4843/51555/570/51268/189
GO:0072663	establishment of protein localization to peroxisome	65	-0.614783	-1.36843	0.0300207	0.157262	2134	tags=14%, list=12%, signal=12%	5264/8309/11001/8528/4843/51555/570/51268/189
GO:0010259	multicellular organism aging	30	-0.682686	-1.42711	0.0300668	0.157343	3198	tags=30%, list=17%, signal=25%	1515/1906/494470/120892/1644/1311/3952/7054/6506
GO:0014061	regulation of norepinephrine secretion	10	-0.790916	-1.42613	0.0301837	0.157647	3324	tags=80%, list=18%, signal=66%	152/151/135/150/3745/64805/5021/183
GO:0008344	adult locomotory behavior	72	-0.621775	-1.3945	0.0301863	0.157647	3164	tags=33%, list=17%, signal=28%	80243/3398/5071/4923/3170/7111/1812/2743/6387/58524/1815/7545/2019/51286/6623/1813/3766/84189/6323/477/6900/124925/23544/7200
GO:0048710	regulation of astrocyte differentiation	27	-0.6834	-1.41749	0.0303712	0.158451	1515	tags=44%, list=8%, signal=41%	3398/9241/3400/3572/388585/84630/7101/4099/4916/6900/9283/2147
GO:0010954	positive regulation of protein processing	21	-0.715235	-1.42774	0.0305882	0.159422	1346	tags=29%, list=7%, signal=27%	85409/10418/6900/2161/3818/55908
GO:0033233	regulation of protein sumoylation	19	0.556873	1.56846	0.0307376	0.160038	3480	tags=47%, list=19%, signal=38%	825/10362/79594/1499/9759/11315/26354/54472/10363
GO:0016126	sterol biosynthetic process	70	-0.610127	-1.36518	0.0308325	0.160369	1247	tags=10%, list=7%, signal=9%	3158/1080/2246/1066/29881/338/335
GO:2000757	negative regulation of peptidyl-lysine acetylation	18	0.546011	1.50876	0.0308906	0.160385	2456	tags=28%, list=13%, signal=24%	6622/7291/26155/28999/55011
GO:0006730	one-carbon metabolic process	24	-0.700512	-1.43346	0.0309633	0.160385	463	tags=12%, list=3%, signal=12%	10840/4143/10841
GO:0045939	negative regulation of steroid metabolic process	24	-0.701361	-1.43519	0.0309633	0.160385	3078	tags=42%, list=17%, signal=35%	3638/27122/5629/653/348/54361/340895/9965/54658/9971
GO:0030071	regulation of mitotic metaphase/anaphase transition	51	0.383456	1.34214	0.0309772	0.160385	3822	tags=31%, list=21%, signal=25%	8379/10459/990/9212/81620/472/891/9787/84861/701/991/51433/699/10403/5347/25906
GO:0055008	cardiac muscle tissue morphogenesis	63	-0.608739	-1.35756	0.0309917	0.160385	4172	tags=60%, list=23%, signal=47%	650/1482/7474/4092/283284/5318/7472/7168/1832/57493/2303/1901/57057/140706/9241/5629/7042/9172/2263/27063/23493/8928/8557/23414/7134/7139/1301/3084/7273/85366/127294/7135/4634/4625/8736/4606/4036/70
GO:0000041	transition metal ion transport	113	-0.57963	-1.31545	0.0311245	0.16091	1218	tags=16%, list=7%, signal=15%	30061/9843/25800/29986/4057/6947/534/57817/283375/341208/525/57348/55532/169026/7036/4504/7018/3263
GO:0002639	positive regulation of immunoglobulin production	36	-0.665372	-1.41789	0.0312164	0.160918	25	tags=11%, list=0%, signal=11%	100141515/90865/3263/5950
GO:0001823	mesonephros development	97	-0.59293	-1.34187	0.03125	0.160918	3710	tags=45%, list=20%, signal=36%	7849/655/6385/4086/2303/51804/5914/596/2737/6382/6469/255743/2247/6662/79633/9241/652/7482/7481/168667/54361/2263/2302/6092/30812/130497/10736/7475/170690/5087/5979/80000/9244/5972/2246/3975/2625/5076/6492/793/2719/2255/183/7490
GO:0009112	nucleobase metabolic process	35	-0.663444	-1.41166	0.03125	0.160918	217	tags=11%, list=1%, signal=11%	1373/316/1807/7276
GO:0016572	histone phosphorylation	38	0.423642	1.38853	0.0312818	0.160918	2501	tags=29%, list=14%, signal=25%	1017/8091/7291/5585/83903/9212/1020/5579/472/8986/891
GO:0010927	cellular component assembly involved in morphogenesis	101	-0.588388	-1.33135	0.0313131	0.160918	3252	tags=36%, list=18%, signal=29%	4621/3880/5159/84033/7138/5629/1906/7111/9172/91807/27063/23114/8557/5156/26011/7139/10529/10753/7273/127294/58529/10324/3549/4892/88/4703/844/845/84665/56203/8736/4606/70/7140/79933/58
GO:0072163	mesonephric epithelium development	93	-0.587703	-1.32648	0.0313765	0.160918	3710	tags=45%, list=20%, signal=36%	7849/655/6385/4086/2303/51804/5914/596/2737/6382/6469/255743/2247/6662/79633/9241/652/7482/7481/168667/54361/2263/2302/6092/30812/130497/10736/7475/170690/5087/5979/80000/9244/2246/3975/2625/5076/6492/793/2719/183/7490
GO:0072164	mesonephric tubule development	93	-0.587703	-1.32648	0.0313765	0.160918	3710	tags=45%, list=20%, signal=36%	7849/655/6385/4086/2303/51804/5914/596/2737/6382/6469/255743/2247/6662/79633/9241/652/7482/7481/168667/54361/2263/2302/6092/30812/130497/10736/7475/170690/5087/5979/80000/9244/2246/3975/2625/5076/6492/793/2719/183/7490
GO:0042755	eating behavior	23	-0.707206	-1.42891	0.0313953	0.160918	700	tags=43%, list=4%, signal=42%	7345/10874/135/51738/6939/5021/3952/56923/7054/7200
GO:0048709	oligodendrocyte differentiation	90	-0.590051	-1.32999	0.0314083	0.160918	1851	tags=24%, list=10%, signal=22%	1746/2840/2064/26011/30812/388585/3084/1191/5803/5764/4821/6547/54413/3766/7080/4915/4099/116448/6900/6664/429/7448
GO:0060038	cardiac muscle cell proliferation	50	-0.636542	-1.39519	0.0316456	0.161915	3653	tags=46%, list=20%, signal=37%	2260/7472/693175/4086/2303/7161/57057/2627/2247/6910/9241/7042/2263/4211/23493/2697/65009/23414/26011/3776/2254/2066/5950
GO:0048260	positive regulation of receptor-mediated endocytosis	47	-0.638931	-1.39474	0.031679	0.161915	1834	tags=19%, list=10%, signal=17%	89780/4908/8862/6424/1191/718/1813/7018/7448
GO:0021954	central nervous system neuron development	72	-0.606084	-1.35931	0.0316973	0.161915	2344	tags=28%, list=13%, signal=24%	1812/2263/7832/2049/2047/1009/6092/166614/91584/1630/1813/7101/4137/27164/1141/3952/4915/57282/6900/429
GO:0098534	centriole assembly	39	0.416376	1.39581	0.0318136	0.162347	1542	tags=15%, list=8%, signal=14%	118611/1017/100653515/8850/25914/284403
GO:0042063	gliogenesis	270	-0.524496	-1.20621	0.031968	0.162973	2926	tags=25%, list=16%, signal=21%	6662/177/1840/9241/10100/4920/54587/54209/7042/146433/3400/1812/8521/3572/3908/89927/7732/90865/374/1746/2840/2064/57165/4602/8941/26011/30812/1956/388585/3084/1191/5649/5803/6657/430/84630/10675/116/5764/6279/4821/3953/6547/54413/64805/7101/4137/3766/7080/5179/4915/4036/92737/1524/4099/5076/566/4916/116448/6900/6664/2255/9283/429/2596/4504/2147/7448
GO:2001053	regulation of mesenchymal cell apoptotic process	11	-0.779492	-1.43503	0.0320513	0.163235	3710	tags=73%, list=20%, signal=58%	7849/655/6899/6469/6662/8200/5076/4487
GO:0048026	positive regulation of mRNA splicing, via spliceosome	18	-0.745695	-1.45811	0.0322196	0.16393	1291	tags=17%, list=7%, signal=16%	56853/283375/11189
GO:0050795	regulation of behavior	55	-0.623515	-1.37833	0.0323253	0.164305	2354	tags=27%, list=13%, signal=24%	3351/348/2697/5649/134/1268/1394/339403/3953/1813/1141/5179/85445/9378/7200
GO:2000846	regulation of corticosteroid hormone secretion	13	-0.763577	-1.42461	0.0327456	0.166228	2133	tags=62%, list=12%, signal=54%	5443/51738/51083/1394/185/5972/6863/183
GO:0006829	zinc ion transport	26	-0.69248	-1.43029	0.0327684	0.166228	1594	tags=23%, list=9%, signal=21%	25800/29986/283375/55532/169026/4504
GO:0046456	icosanoid biosynthetic process	44	-0.638962	-1.38436	0.0329087	0.166775	3648	tags=34%, list=20%, signal=27%	239/2681/8644/124975/1906/552/9536/5743/5742/1907/27306/246/5319/1559/1558
GO:0048568	embryonic organ development	400	-0.505342	-1.16476	0.032967	0.166808	3983	tags=36%, list=22%, signal=28%	7472/6911/1028/1437/2294/115908/57216/124590/55036/7849/655/9645/56034/6899/677/2303/1750/51804/7043/7173/9742/5155/2535/3218/5080/9394/26018/1942/51168/5914/7124/3880/2737/57057/2709/6469/51294/79805/3398/3638/3199/3373/1749/3576/2702/6662/6935/2048/203447/2637/3212/9241/23314/10083/3204/4237/1050/5629/125488/4920/1906/7042/652/7483/9368/57453/653/5125/7481/10818/9620/9423/4188/10804/2263/8521/2…
GO:0043650	dicarboxylic acid biosynthetic process	14	-0.763683	-1.42501	0.0329949	0.166808	1148	tags=29%, list=6%, signal=27%	27165/23498/6507/130013
GO:0001764	neuron migration	143	-0.56095	-1.27899	0.033033	0.166808	2785	tags=27%, list=15%, signal=23%	23314/51473/1233/5592/1281/1812/9620/9423/2621/815/6387/323/26053/54328/84623/2697/8941/4897/2676/347733/3084/5649/1630/1813/1496/7080/1641/2066/4915/92737/3975/2625/4916/63923/6900/460/429/2823
GO:0044786	cell cycle DNA replication	70	0.360521	1.36381	0.0330452	0.166808	3341	tags=29%, list=18%, signal=23%	5558/8318/4174/2237/5888/81620/80174/5425/3978/5424/57804/8317/51053/54962/4176/4172/8882/144455/6117/4171
GO:0060675	ureteric bud morphogenesis	61	-0.608268	-1.3546	0.033092	0.16688	3290	tags=41%, list=18%, signal=34%	596/2737/6469/255743/2247/6662/79633/9241/652/7482/7481/54361/30812/10736/7475/170690/5087/80000/2246/3975/2625/5076/2719/183/7490
GO:0072070	loop of Henle development	10	-0.80719	-1.45548	0.0332007	0.167022	2089	tags=50%, list=11%, signal=44%	153572/79191/388585/79192/5455
GO:0097107	postsynaptic density assembly	16	-0.759131	-1.45079	0.0332103	0.167022	2353	tags=44%, list=13%, signal=38%	5789/9379/50944/26045/4916/9378/347730
GO:0044030	regulation of DNA methylation	19	-0.731217	-1.43854	0.0333731	0.167022	65	tags=11%, list=0%, signal=10%	5290/7490
GO:0050912	detection of chemical stimulus involved in sensory perception of taste	19	-0.731196	-1.4385	0.0333731	0.167022	1137	tags=58%, list=6%, signal=54%	54429/5284/342372/50832/338557/83756/1470/1469/4025/1472/5304
GO:0099590	neurotransmitter receptor internalization	19	-0.730644	-1.43741	0.0333731	0.167022	2020	tags=42%, list=11%, signal=38%	1815/59283/3208/27092/50632/146395/23237/6616
GO:0007052	mitotic spindle organization	104	0.300727	1.1581	0.0334051	0.167022	4750	tags=38%, list=26%, signal=29%	3303/9212/284403/79187/4605/7283/25886/25777/3925/2770/4134/3833/891/3304/10460/9493/5524/10039/9639/991/79998/6491/1639/1778/10403/2801/2316/3837/5347/5119/9055/49856/6790/1062/126731/4204/27243/332/3832/79598
GO:0051193	regulation of cofactor metabolic process	35	-0.662251	-1.40912	0.0334052	0.167022	655	tags=14%, list=4%, signal=14%	255027/405753/130013/4504/3240
GO:0009261	ribonucleotide catabolic process	32	0.455169	1.44385	0.0334084	0.167022	4310	tags=47%, list=23%, signal=36%	215/11332/5152/10846/5144/11163/374659/79873/5142/53343/170685/9583/23417/11165/131870
GO:0042908	xenobiotic transport	18	-0.741302	-1.44952	0.0334129	0.167022	1431	tags=28%, list=8%, signal=26%	8856/6570/146802/55244/5174
GO:0060840	artery development	87	-0.58514	-1.31927	0.0334686	0.167137	4481	tags=46%, list=24%, signal=35%	64220/4091/6495/94/4638/4035/5396/4092/4015/2294/4854/6899/4052/2303/2737/6469/5159/144165/2702/93649/9241/5629/7042/652/1281/7481/348/9464/11174/23493/8928/6092/4016/2348/1311/3952/4036/27329/7021/338
GO:0045103	intermediate filament-based process	46	-0.638143	-1.38889	0.0339343	0.169292	2211	tags=30%, list=12%, signal=27%	6469/83481/54474/81493/3872/4741/4747/7062/3868/286887/5630/3861/3857/2670
GO:0030900	forebrain development	340	-0.5144	-1.18454	0.033966	0.169292	3333	tags=28%, list=18%, signal=23%	5914/50937/146760/2737/64211/6469/1943/84879/22809/3398/4900/1749/6531/79633/2048/6753/2637/9241/23314/5629/388677/5592/652/1281/3400/552/7482/10818/3624/1812/6751/120892/54361/2263/6387/374946/139411/6331/7832/2049/84623/89927/26038/9001/1746/89780/6092/8941/1956/358/4747/388585/166614/145258/3084/6585/91584/5649/9638/6657/8646/1394/6343/116/5764/2018/6496/6547/64805/1813/7476/7101/27164/7080/50…
GO:0048645	animal organ formation	61	-0.606284	-1.35018	0.0341262	0.169925	3232	tags=41%, list=18%, signal=34%	2737/6469/2627/6910/23213/9241/652/367/7482/10818/2263/579/9464/8928/8313/89780/6092/64321/2348/140628/2246/4036/5076/2255/7490
GO:0032526	response to retinoic acid	100	-0.588396	-1.33137	0.0343782	0.170804	4019	tags=38%, list=22%, signal=30%	3485/5753/7472/56603/54332/2707/6899/6096/5914/7473/5159/3199/1277/6662/11211/2706/7483/9536/7481/1592/2263/2697/89780/4602/358/130497/3294/7475/1620/5979/3952/5076/4916/6532/5105/57795/429/5950
GO:0030397	membrane disassembly	16	0.57924	1.59475	0.0344025	0.170804	6456	tags=75%, list=35%, signal=49%	5579/23175/891/1639/23399/5347/9133/7443/10783/91754/5048/81565
GO:0051081	nuclear envelope disassembly	16	0.57924	1.59475	0.0344025	0.170804	6456	tags=75%, list=35%, signal=49%	5579/23175/891/1639/23399/5347/9133/7443/10783/91754/5048/81565
GO:0010744	positive regulation of macrophage derived foam cell differentiation	16	-0.758397	-1.44939	0.0344403	0.170827	1622	tags=44%, list=9%, signal=40%	4023/5320/5196/948/185/183/338
GO:0048243	norepinephrine secretion	11	-0.776786	-1.43005	0.0346154	0.171529	3324	tags=73%, list=18%, signal=60%	152/151/135/150/3745/64805/5021/183
GO:0007156	homophilic cell adhesion via plasma membrane adhesion molecules	161	-0.548853	-1.25649	0.034965	0.172762	4421	tags=50%, list=24%, signal=39%	56122/1952/5175/56127/5097/2196/8641/56146/56106/9746/81607/56100/22997/1830/4680/57526/90952/56099/56132/56134/56102/1003/5101/147409/56101/23022/51294/84966/1825/56131/79633/1005/56129/347902/57453/9620/57549/1048/56147/54510/56103/152330/27253/9708/84623/1009/64072/6092/92211/53841/29930/1014/1006/120114/9499/27255/56097/54825/1010/5100/54798/222256/64405/57575/1015/1004/1008/65217/56098/84665…
GO:0010226	response to lithium ion	20	-0.721131	-1.43991	0.034965	0.172762	4183	tags=55%, list=23%, signal=43%	107/3485/1027/6469/3398/4776/1050/5743/58/5313/429
GO:0042403	thyroid hormone metabolic process	20	-0.723021	-1.44369	0.034965	0.172762	1943	tags=80%, list=11%, signal=72%	90527/53905/51301/7849/7173/1734/27284/389434/1735/50506/7038/6528/2304/405753/2625/1733
GO:0048469	cell maturation	154	-0.552159	-1.26128	0.035	0.172768	2873	tags=27%, list=16%, signal=23%	27289/116369/1050/347688/6690/1235/120892/5745/51083/23114/2697/2056/163589/30812/4897/59277/2046/1672/342035/4880/388585/440712/1080/3549/2069/6954/718/10265/6496/5979/10882/577/5972/2625/283/83853/6900/5241/1811/2266/55908/429
GO:0007585	respiratory gaseous exchange by respiratory system	56	-0.618	-1.36871	0.0353798	0.174403	3332	tags=39%, list=18%, signal=32%	2530/3714/50832/4923/3176/1909/1906/6939/7134/2006/8862/1602/134/9427/9407/54413/6441/477/729238/6440/653509/6439
GO:0071281	cellular response to iron ion	10	-0.785128	-1.4157	0.0354331	0.174403	63	tags=30%, list=0%, signal=30%	30061/7036/7018
GO:0090193	positive regulation of glomerulus development	10	-0.785551	-1.41646	0.0354331	0.174403	2827	tags=70%, list=15%, signal=59%	5155/9241/80310/8710/5979/5076/9370
GO:0060043	regulation of cardiac muscle cell proliferation	40	-0.647369	-1.38274	0.0354839	0.174486	3215	tags=45%, list=17%, signal=37%	2260/7472/693175/7161/57057/2627/2247/6910/9241/2263/4211/23493/2697/23414/3776/2254/2066/5950
GO:1901016	regulation of potassium ion transmembrane transporter activity	51	-0.63256	-1.39056	0.0356768	0.175266	2624	tags=35%, list=14%, signal=30%	776/54209/9722/2273/3788/51083/8811/4878/283518/88/845/23630/3747/3736/3746/23704/219527/482
GO:0016045	detection of bacterium	11	-0.773872	-1.42468	0.0358974	0.175621	1530	tags=36%, list=8%, signal=33%	64127/57115/114771/114770
GO:0042415	norepinephrine metabolic process	11	-0.77462	-1.42606	0.0358974	0.175621	3077	tags=64%, list=17%, signal=53%	5071/285671/9464/1621/3642/7054/2625
GO:0050713	negative regulation of interleukin-1 beta secretion	11	-0.774022	-1.42496	0.0358974	0.175621	2033	tags=27%, list=11%, signal=24%	440068/199713/335
GO:0014706	striated muscle tissue development	340	-0.513183	-1.18174	0.035964	0.175621	4040	tags=37%, list=22%, signal=29%	57538/4015/5318/5350/7472/56603/9734/57158/7168/1832/6665/655/6899/57493/406/693175/4086/2303/51804/1901/26585/5914/50937/596/56261/7504/7161/57057/6469/5159/2627/3398/22953/2247/2702/140706/93649/7093/6910/246329/9241/57496/5629/26287/1906/57462/7042/652/653/1634/10818/148/26576/6261/9172/91807/5999/1134/2263/2626/27063/4211/2139/10472/7832/115701/9148/23493/2047/8928/8557/2697/4878/5156/65009/8…
GO:0048705	skeletal system morphogenesis	221	-0.534505	-1.23023	0.035964	0.175621	4683	tags=45%, list=25%, signal=34%	3215/5916/91355/3214/144347/3202/4146/55512/6495/6474/5079/9496/4325/5396/4041/2260/64399/56603/1490/655/6899/2303/51804/7043/9742/3218/1303/26585/5914/338773/8538/6781/2737/3638/3199/7010/3373/1749/1277/6662/6935/85301/3212/9241/81578/23314/3204/1293/4920/6939/652/7483/389058/57453/1305/176/2261/8785/4188/7373/2263/579/340706/8817/5156/3213/1746/8313/162466/249/6913/130497/1301/658/4880/10736/64…
GO:0051896	regulation of protein kinase B signaling	202	-0.536521	-1.23542	0.035964	0.175621	3544	tags=31%, list=19%, signal=25%	5155/10268/3082/2252/3480/7124/799/143686/2852/5159/8600/8644/7010/642273/2247/388121/8822/57462/5295/9368/10818/930/2264/2261/2621/2263/2626/9365/219736/8817/7057/374/5156/1440/1646/2064/1956/3488/7066/3084/2660/2069/6425/64805/5979/1813/2254/2066/2246/2099/255324/3952/4915/2625/1524/1116/9965/2255/152831/3481/2159/2155
GO:0070914	UV-damage excision repair	12	0.617175	1.5125	0.0360042	0.175621	4101	tags=50%, list=22%, signal=39%	4157/92815/2067/7508/1643/1642
GO:0060078	regulation of postsynaptic membrane potential	118	-0.572937	-1.30207	0.0360721	0.175621	3140	tags=42%, list=17%, signal=35%	135/22953/51738/4923/8973/2563/116443/2564/388135/2743/5999/1134/120892/57502/112755/2904/1815/2894/1136/57030/2561/50944/5649/134/56853/1146/2905/116/2901/2259/2555/2558/54413/1813/2897/3751/7476/2903/55584/1141/2900/2899/3736/9378/8001/2892/642938/124925/2890
GO:0031016	pancreas development	68	-0.604445	-1.34877	0.0360825	0.175621	3951	tags=41%, list=21%, signal=32%	3569/2294/55036/406/5080/3110/2696/6469/2627/6662/3170/6927/5629/3175/652/2494/653/579/3651/222546/3172/387597/3549/4821/3642/123872/2255/3481
GO:0015909	long-chain fatty acid transport	63	-0.606679	-1.35296	0.036157	0.175621	2278	tags=27%, list=12%, signal=24%	348/80763/28965/1815/7057/11001/5320/286256/948/1813/56923/5319/64600/10998/7069/2168/84647
GO:0051385	response to mineralocorticoid	26	-0.687056	-1.41909	0.0361582	0.175621	3197	tags=38%, list=17%, signal=32%	2852/4129/1906/552/3351/4747/6770/7054/4916/7200
GO:0072079	nephron tubule formation	17	-0.750479	-1.45604	0.0361882	0.175621	3710	tags=76%, list=20%, signal=61%	7849/51804/6662/9241/153572/30812/79191/130497/388585/7475/2625/79192/5076
GO:0032392	DNA geometric change	116	0.324198	1.17447	0.0361936	0.175621	4979	tags=37%, list=27%, signal=27%	89797/8318/4174/5888/2068/8438/22907/3159/5965/641/164045/23132/10721/4176/4172/80119/6117/10856/2547/7311/4171/2968/7508/51659/8607/9401/1107/7314/54921/56652/1643/1642/9557/84515/84296/9978/50485/51750/93973/1663/4175/5983/2966
GO:0070252	actin-mediated cell contraction	107	-0.57715	-1.30576	0.0363269	0.176046	4147	tags=51%, list=23%, signal=40%	9992/6330/122786/5318/5350/487/7168/3759/1832/3753/783/2013/4621/6781/2702/776/7138/10630/3762/7111/9722/775/2626/3784/6331/8557/2697/3757/7134/6327/7139/3741/7273/85366/134/7429/7135/10021/88/4703/7136/55800/29119/4634/4625/7125/23630/4606/70/6323/477/23704/7140/58/3760
GO:0016180	snRNA processing	25	0.491313	1.48905	0.0363499	0.176046	4108	tags=56%, list=22%, signal=44%	64852/26173/79650/55756/55174/114034/80789/54512/54973/56915/5393/23016/118460/23404
GO:0018195	peptidyl-arginine modification	24	-0.69584	-1.4239	0.0366972	0.177154	3621	tags=38%, list=20%, signal=30%	23569/419/116969/11240/420/29943/56341/51702/9971
GO:0033131	regulation of glucokinase activity	10	-0.783258	-1.41232	0.0367454	0.177154	398	tags=40%, list=2%, signal=39%	5071/3170/5207/2646
GO:0045741	positive regulation of epidermal growth factor-activated receptor activity	10	-0.784028	-1.41371	0.0367454	0.177154	2019	tags=50%, list=11%, signal=45%	9148/150/134/2069/255324
GO:0032506	cytokinetic process	39	0.404293	1.3553	0.0368812	0.177154	5918	tags=54%, list=32%, signal=37%	55909/200942/9212/56907/27183/116840/91782/9493/54443/55165/5119/54784/79643/51429/27243/23636/311/387/10112/257364/57132
GO:0006054	N-acetylneuraminate metabolic process	11	0.659633	1.59641	0.0368906	0.177154	1932	tags=27%, list=11%, signal=24%	5973/51005/10020
GO:0022029	telencephalon cell migration	50	-0.627598	-1.37559	0.0369198	0.177154	2344	tags=30%, list=13%, signal=26%	1812/120892/6387/89927/8941/1956/3084/5649/64805/1813/7101/7080/5455/6900/7143
GO:0072111	cell proliferation involved in kidney development	19	-0.727463	-1.43116	0.0369487	0.177154	3709	tags=58%, list=20%, signal=46%	655/5155/6469/5159/652/80310/130497/8710/2625/2719/7490
GO:0097366	response to bronchodilator	48	-0.633244	-1.37983	0.0369588	0.177154	2344	tags=27%, list=13%, signal=24%	1812/5999/5153/1815/358/1621/1813/2903/5021/7054/3747/1800/4504
GO:0009612	response to mechanical stimulus	203	-0.53366	-1.22899	0.036963	0.177154	2544	tags=23%, list=14%, signal=20%	1281/7481/1634/63895/117532/3356/2626/27063/6387/5743/7832/8557/2697/7057/7100/4878/9379/441027/1956/358/10631/3741/1301/4316/7273/3776/8740/40/8989/5764/3549/642658/1813/6507/84189/55584/6323/8200/4099/477/3736/3746/1116/9378/50964/58/183
GO:0071695	anatomical structure maturation	205	-0.534347	-1.2307	0.036963	0.177154	2903	tags=26%, list=16%, signal=22%	79633/27289/116369/1050/347688/7042/6690/1235/6261/2261/120892/5745/51083/23114/2697/2056/163589/8941/30812/162466/4897/59277/2046/1672/342035/4880/388585/440712/1080/3549/2069/4057/6954/718/10265/51286/6496/11005/5979/10882/577/5972/3952/2625/1524/5076/283/83853/6900/5241/1811/2266/55908/429
GO:1901617	organic hydroxy compound biosynthetic process	238	-0.531735	-1.2244	0.036963	0.177154	3295	tags=23%, list=18%, signal=19%	7124/114880/56624/2852/8644/3638/2247/4923/6531/27122/10858/5629/9023/7042/653/3067/2264/348/54361/5745/57678/9464/5332/8309/11001/1644/1588/1621/246/3158/1080/7166/2246/3952/6770/3642/7054/2625/5409/340895/10998/1066/9965/5105/1576/570/29881/8647/9971/117/5053/1582/1109/338/335
GO:0010042	response to manganese ion	18	-0.736388	-1.43992	0.0369928	0.177154	2245	tags=33%, list=12%, signal=29%	120892/5743/387758/7054/55532/383
GO:0048660	regulation of smooth muscle cell proliferation	129	-0.562649	-1.2788	0.0370741	0.177282	4479	tags=42%, list=24%, signal=32%	3592/55512/5058/3606/3673/7015/3725/3586/1027/3569/7168/4854/239/7043/1901/5155/10203/7124/2852/5159/27250/3398/2247/93649/57447/3593/5592/8840/1906/652/3351/2263/80310/5743/7057/65009/4602/1956/3488/2006/8862/4880/388585/4969/7434/4881/2069/2254/7432/283/27035/183/5345/9370
GO:1901998	toxin transport	34	0.430525	1.35935	0.0370885	0.177282	2610	tags=24%, list=14%, signal=20%	3274/535/6581/26088/118429/29126/664/10574
GO:0010884	positive regulation of lipid storage	20	-0.717631	-1.43292	0.037296	0.178108	1685	tags=30%, list=9%, signal=27%	1149/4023/948/718/222008/338
GO:0009953	dorsal/ventral pattern formation	79	-0.59219	-1.32979	0.0376399	0.179432	3510	tags=37%, list=19%, signal=30%	5080/26585/7473/2737/57057/6469/3199/3212/9241/1906/652/57453/4188/58524/89780/80319/2128/658/145258/8646/2019/4821/6496/7476/121643/7080/3975/4010/429
GO:0061005	cell differentiation involved in kidney development	52	-0.624591	-1.37685	0.0376569	0.179432	3984	tags=48%, list=22%, signal=38%	9863/9788/947/7849/2303/5155/5420/2737/6469/84662/79633/652/54361/8842/2302/4868/130497/10736/5800/3975/2625/5455/5076/7490/9370
GO:2000177	regulation of neural precursor cell proliferation	83	-0.585077	-1.31394	0.0376782	0.179432	3315	tags=33%, list=18%, signal=27%	50937/2737/64211/6469/3398/5629/57540/120892/7832/644943/89780/57165/5803/116/5764/51286/6496/131405/1813/7101/4036/3642/3975/1524/6532/9283/429
GO:0050926	regulation of positive chemotaxis	25	-0.692051	-1.41964	0.0377143	0.179438	3577	tags=56%, list=19%, signal=45%	1901/285/2277/3576/177/1233/9048/6387/4908/7857/566/4916/2255/2155
GO:0035641	locomotory exploration behavior	12	-0.775773	-1.43432	0.0380711	0.180967	2278	tags=58%, list=12%, signal=51%	348/120892/2571/1394/5179/57282/7143
GO:0006590	thyroid hormone generation	16	-0.755643	-1.44412	0.0381304	0.181082	1913	tags=81%, list=10%, signal=73%	90527/53905/7849/7173/1734/389434/1735/50506/6528/2304/405753/2625/1733
GO:0010827	regulation of glucose transmembrane transport	66	-0.607089	-1.35193	0.038342	0.181689	1006	tags=12%, list=5%, signal=11%	718/3952/5319/2719/9965/55600/6506/9370
GO:0033555	multicellular organismal response to stress	66	-0.605077	-1.34745	0.038342	0.181689	2344	tags=36%, list=13%, signal=32%	1812/348/1815/2697/7057/116372/7060/6869/5649/4842/1621/8989/1394/116/1620/6530/2558/5979/7101/5179/56923/6863/55515/117
GO:0043279	response to alkaloid	95	-0.581578	-1.31452	0.0383838	0.181689	2402	tags=24%, list=13%, signal=21%	1393/6261/3351/1812/5999/3356/1815/3651/1644/1268/6263/27092/1394/845/1813/5021/1141/5179/6770/6863/7054/3359/6529
GO:0044818	mitotic G2/M transition checkpoint	29	0.488043	1.51619	0.038468	0.181689	4520	tags=48%, list=25%, signal=36%	8091/63967/4998/990/84446/472/90381/80279/641/29997/672/9344/51347/29980
GO:0006409	tRNA export from nucleus	34	0.428051	1.35153	0.0384707	0.181689	6815	tags=65%, list=37%, signal=41%	9688/6396/23511/10762/100101267/9883/23225/65083/23165/8021/23636/5901/81929/348995/8086/4928/55706/4927/79023/5903/9631/9972
GO:0071431	tRNA-containing ribonucleoprotein complex export from nucleus	34	0.428051	1.35153	0.0384707	0.181689	6815	tags=65%, list=37%, signal=41%	9688/6396/23511/10762/100101267/9883/23225/65083/23165/8021/23636/5901/81929/348995/8086/4928/55706/4927/79023/5903/9631/9972
GO:0021924	cell proliferation in external granule layer	15	-0.754737	-1.41544	0.0386534	0.181926	3185	tags=53%, list=17%, signal=44%	64211/6469/22809/2637/51286/3975/6532/9283
GO:0021930	cerebellar granule cell precursor proliferation	15	-0.754737	-1.41544	0.0386534	0.181926	3185	tags=53%, list=17%, signal=44%	64211/6469/22809/2637/51286/3975/6532/9283
GO:0045833	negative regulation of lipid metabolic process	76	-0.594257	-1.33594	0.0386572	0.181926	3295	tags=30%, list=18%, signal=25%	7124/2852/8644/3638/84649/27122/5629/653/348/54361/150/1149/375704/134/1268/2822/145264/340895/9965/341/54658/9971/344
GO:0021885	forebrain cell migration	53	-0.62116	-1.36896	0.0386625	0.181926	2344	tags=30%, list=13%, signal=26%	1812/120892/6387/89927/8941/1956/3084/5649/2018/64805/1813/7101/7080/5455/6900/7143
GO:0070192	chromosome organization involved in meiotic cell cycle	53	0.360428	1.27338	0.0387396	0.182122	2037	tags=26%, list=11%, signal=24%	23310/284071/84944/100130958/56154/317761/84072/29781/339834/10734/5888/7917/2177/472
GO:0043410	positive regulation of MAPK cascade	494	-0.495447	-1.14435	0.038961	0.182828	3346	tags=25%, list=18%, signal=21%	7164/84962/152/50937/7124/151/799/7161/2852/6361/255743/5159/8600/7010/2247/51738/64127/10344/338557/11211/177/222643/203447/388121/4920/1906/54209/7042/652/392255/2690/8325/367/10818/5063/148/3487/2264/2261/4803/2621/348/168667/120892/3356/2263/2626/9365/80310/389658/9464/8817/10913/51384/1815/57007/6364/7057/2056/5156/65009/4908/2064/150/1956/7066/5320/2046/948/3084/3814/134/1852/246/6657/2785/…
GO:0050727	regulation of inflammatory response	308	-0.515323	-1.18719	0.038961	0.182828	3515	tags=27%, list=19%, signal=22%	284340/10203/3082/5603/53342/1003/7850/7124/2852/8600/27250/135/7010/284467/6401/51738/64127/114899/22861/338557/177/3593/1050/27190/53833/8840/54209/171389/9173/55540/56670/81792/348/120892/3572/5743/7130/90865/4878/2840/1588/1956/4023/5320/6280/1215/4843/134/6542/1268/116379/84630/116/6279/59272/6288/185/199713/718/5733/5169/405753/2099/3952/6863/3848/6369/6283/2625/7356/2161/50604/3929/3818/18…
GO:0032536	regulation of cell projection size	13	-0.753889	-1.40654	0.0390428	0.183044	3254	tags=62%, list=18%, signal=51%	7504/10083/53841/4747/54825/7429/7476/6900
GO:0016925	protein sumoylation	78	0.335335	1.25988	0.0391266	0.183135	5049	tags=36%, list=27%, signal=26%	825/54795/10362/9688/79594/1499/9759/23511/11315/26354/5905/10055/54472/8535/10363/2138/10762/100101267/387082/9883/10155/51588/23225/23165/8021/23636/54552/9063
GO:0031057	negative regulation of histone modification	39	0.403129	1.3514	0.0391334	0.183135	4157	tags=31%, list=23%, signal=24%	6622/7291/5252/26155/7349/55011/6598/672/23028/3720/55693/56848
GO:2000272	negative regulation of signaling receptor activity	45	-0.63289	-1.37554	0.0392365	0.183385	3598	tags=38%, list=20%, signal=30%	100463482/10268/799/100462981/27122/2048/27123/1393/130574/116372/100463486/100462977/66004/124857/4062/131/27121
GO:1905332	positive regulation of morphogenesis of an epithelium	33	-0.66135	-1.39803	0.0392585	0.183385	3983	tags=48%, list=22%, signal=38%	7472/7849/239/51804/6662/9241/652/367/7482/54361/219736/30812/3975/2625/5076/183
GO:0006206	pyrimidine nucleobase metabolic process	16	-0.754615	-1.44216	0.0393604	0.183694	217	tags=25%, list=1%, signal=25%	978/56474/1373/1807
GO:0010499	proteasomal ubiquitin-independent protein catabolic process	21	0.500961	1.42303	0.0395257	0.184293	4243	tags=48%, list=23%, signal=37%	5698/5699/5695/5694/5685/5691/5692/5696/5693/5690
GO:0003417	growth plate cartilage development	32	-0.669537	-1.40686	0.0395604	0.184293	3441	tags=47%, list=19%, signal=38%	1303/5914/6781/85301/81578/1293/8785/7373/340706/4880/51435/1311/4148/5212/4322
GO:0002479	antigen processing and presentation of exogenous peptide antigen via MHC class I, TAP-dependent	72	0.347856	1.31079	0.0397862	0.184938	4243	tags=44%, list=23%, signal=34%	5698/653361/6890/6891/5699/3133/5695/3105/3106/3107/3134/5721/5694/5714/5715/5719/9341/5685/4689/5702/8773/5708/811/5691/567/5692/5696/2923/5705/5693/10197/5690
GO:1900409	positive regulation of cellular response to oxidative stress	17	-0.741281	-1.43819	0.039807	0.184938	153	tags=29%, list=1%, signal=29%	2309/7099/7124/9104/27035
GO:1902644	tertiary alcohol metabolic process	17	-0.742648	-1.44084	0.039807	0.184938	3085	tags=53%, list=17%, signal=44%	8644/27122/653/54361/1646/1583/57016/1645/1109
GO:0033363	secretory granule organization	30	0.443605	1.4088	0.0399023	0.185213	2341	tags=27%, list=13%, signal=23%	5270/1130/23682/2149/84062/26276/9519/64753
GO:0098698	postsynaptic specialization assembly	19	-0.722648	-1.42168	0.0405244	0.187798	2353	tags=42%, list=13%, signal=37%	5789/9379/50944/26045/4916/9378/347730/2596
GO:0050000	chromosome localization	71	0.329743	1.24074	0.0405323	0.187798	3741	tags=37%, list=20%, signal=29%	284071/8379/54984/11004/81620/55143/27183/3835/472/283489/113130/10300/3833/891/150465/91782/4292/9787/10615/81930/79998/1778/10403/3837/5119/150365
GO:0032370	positive regulation of lipid transport	55	-0.612643	-1.3543	0.0406674	0.188254	592	tags=31%, list=3%, signal=30%	8600/22925/51738/4923/26154/1906/348/51083/1588/4602/6863/5244/8529/1579/9370/5444/335
GO:0061640	cytoskeleton-dependent cytokinesis	97	0.32119	1.22477	0.0408356	0.188862	3643	tags=31%, list=20%, signal=25%	152015/55521/55964/1731/585/55909/4628/200942/9212/81620/3619/56907/27183/11113/5414/3925/6711/23503/116840/91782/9493/9820/10801/54443/79998/55165/84445/1058/5347/5119
GO:0042692	muscle cell differentiation	328	-0.513349	-1.18254	0.040959	0.189263	3333	tags=32%, list=18%, signal=27%	5914/50937/338773/596/8538/7504/4621/3880/6382/2852/6469/255743/5159/2318/27250/2627/22953/84033/10266/93649/6662/6935/7138/91653/6910/246329/4776/57496/93166/5629/26287/1906/3020/57462/652/552/8038/7111/10818/148/6261/9172/91807/101929726/5999/54361/1048/2263/2626/27063/341676/115701/23493/8557/4878/5156/89780/10290/4868/3488/84700/7139/10529/575/9254/10753/221476/3084/7273/4842/127294/90342/131…
GO:0008286	insulin receptor signaling pathway	134	-0.559114	-1.27431	0.041041	0.189443	2177	tags=15%, list=12%, signal=13%	9365/340706/1154/2888/3645/375704/5919/2822/2660/534/493829/6121/3952/145264/525/3481/183/9971/3484/197
GO:0031572	G2 DNA damage checkpoint	30	0.441198	1.40116	0.0410973	0.189443	6061	tags=70%, list=33%, signal=47%	8091/63967/84446/472/80279/641/29997/672/5347/9344/29086/1111/51347/29980/51514/8555/51343/9577/60561/51720/25949
GO:0001977	renal system process involved in regulation of blood volume	15	-0.749334	-1.40531	0.0411471	0.189443	3544	tags=73%, list=19%, signal=59%	5155/2013/2702/66002/2621/3291/2697/134/5800/8529/1579
GO:0099509	regulation of presynaptic cytosolic calcium ion concentration	15	-0.752266	-1.4108	0.0411471	0.189443	3390	tags=67%, list=18%, signal=54%	783/776/9256/3351/134/1268/794/10590/793/491
GO:0061844	antimicrobial humoral immune response mediated by antimicrobial peptide	47	-0.629452	-1.37405	0.0411827	0.189443	1633	tags=36%, list=9%, signal=33%	3853/6280/1672/57115/5196/114771/4057/6278/11005/84659/5967/5650/5319/6283/25818/5225/2147
GO:0000460	maturation of 5.8S rRNA	27	0.471119	1.43509	0.0412708	0.189679	4788	tags=56%, list=26%, signal=41%	23481/79707/5394/54512/90459/23246/117246/65095/5393/9875/23016/23404/27340/8602/55759
GO:1904292	regulation of ERAD pathway	29	0.484832	1.50621	0.0414557	0.190358	4909	tags=59%, list=27%, signal=43%	9709/51035/6449/7917/10869/9695/91445/857/91319/55741/10956/51009/9024/91304/51465/7327/258010
GO:0060419	heart growth	86	-0.581029	-1.30805	0.0416667	0.190856	3664	tags=40%, list=20%, signal=32%	57493/693175/4086/2303/1901/7161/57057/2627/2247/140706/6910/9241/5629/1906/7042/148/5999/2263/2626/4211/23493/2697/4878/65009/23414/26011/221476/3776/57817/2254/2066/183/7490/5950
GO:0051953	negative regulation of amine transport	19	-0.720328	-1.41712	0.0417163	0.190856	2268	tags=58%, list=12%, signal=51%	5999/2917/150/134/1268/1394/64805/1813/3952/1113/7200
GO:0007158	neuron cell-cell adhesion	16	-0.752448	-1.43802	0.0418204	0.190856	2147	tags=62%, list=12%, signal=55%	152330/57502/9379/4685/54413/5979/9378/1056/7143/460
GO:0071732	cellular response to nitric oxide	16	-0.751507	-1.43622	0.0418204	0.190856	509	tags=25%, list=3%, signal=24%	358/3747/1800/4504
GO:0072189	ureter development	16	-0.750909	-1.43508	0.0418204	0.190856	3201	tags=69%, list=17%, signal=57%	4774/6469/6662/652/30812/130497/2018/5979/3975/2625/5076
GO:0006706	steroid catabolic process	23	-0.698163	-1.41064	0.0418605	0.190856	2278	tags=39%, list=12%, signal=34%	10858/348/1591/1588/6783/8630/1056/1576/4504
GO:0035930	corticosteroid hormone secretion	14	-0.751728	-1.4027	0.0418782	0.190856	2133	tags=57%, list=12%, signal=51%	5443/51738/51083/1394/185/5972/6863/183
GO:0009394	2'-deoxyribonucleotide metabolic process	30	0.439668	1.3963	0.0418953	0.190856	2925	tags=33%, list=16%, signal=28%	100/26289/56953/7298/4521/252969/1841/9519/79873/1716
GO:0046634	regulation of alpha-beta T cell activation	90	0.320424	1.19413	0.0418986	0.190856	1823	tags=26%, list=10%, signal=23%	3662/384/3707/8764/864/3458/7704/257101/7535/3594/100/30009/916/64926/3142/84695/6375/54440/8943/3133/10892/3659/84807
GO:0007623	circadian rhythm	187	-0.536233	-1.23037	0.041958	0.190957	4183	tags=25%, list=23%, signal=20%	107/8864/5563/55124/79365/50865/1437/8553/84432/406/10874/6096/1364/135/22809/3398/51738/445/5629/6478/9099/3400/3363/1815/3172/1644/1956/4843/134/60675/6496/92369/1813/7166/3751/7080/6121/1141/3952/6770/4915/7054/8431/4916/6532/9370/2155
GO:0002062	chondrocyte differentiation	116	-0.565212	-1.2833	0.0421264	0.191553	2926	tags=37%, list=16%, signal=31%	6662/85301/23213/81578/1293/8840/7045/652/7483/392255/55959/176/7482/81792/2261/8785/7373/5745/579/2202/340706/8817/8313/91461/130497/1301/658/4880/10736/5744/51435/6423/1311/2822/3549/642658/4148/7476/5212/2254/8200/7227/1280
GO:0000291	nuclear-transcribed mRNA catabolic process, exonucleolytic	35	0.416811	1.30014	0.0422824	0.191568	5442	tags=49%, list=30%, signal=34%	28960/80153/54512/6499/23644/115024/56915/5393/51690/23016/118460/23404/219988/80349/10767/129563/5436
GO:0031223	auditory behavior	11	-0.768271	-1.41437	0.0423077	0.191568	1870	tags=45%, list=10%, signal=41%	9379/1813/6507/84189/9378
GO:1903299	regulation of hexokinase activity	11	-0.768052	-1.41397	0.0423077	0.191568	398	tags=36%, list=2%, signal=36%	5071/3170/5207/2646
GO:0014046	dopamine secretion	29	-0.664201	-1.38812	0.0423163	0.191568	3077	tags=62%, list=17%, signal=52%	5071/83849/8973/84258/127833/3351/3356/6387/90019/23208/91683/6857/1268/57586/6623/1813/143425/1141
GO:0014059	regulation of dopamine secretion	29	-0.664201	-1.38812	0.0423163	0.191568	3077	tags=62%, list=17%, signal=52%	5071/83849/8973/84258/127833/3351/3356/6387/90019/23208/91683/6857/1268/57586/6623/1813/143425/1141
GO:0010575	positive regulation of vascular endothelial growth factor production	28	-0.67233	-1.39555	0.0425056	0.192197	2855	tags=46%, list=16%, signal=39%	2324/3569/284340/23213/55959/2626/3572/5743/3552/718/4838/727/27035
GO:0010039	response to iron ion	33	-0.657247	-1.38935	0.04253	0.192197	1907	tags=27%, list=10%, signal=24%	3651/30061/79901/57817/1813/7031/1543/7036/7018
GO:0010863	positive regulation of phospholipase C activity	41	-0.642953	-1.38063	0.042735	0.192864	3173	tags=41%, list=17%, signal=34%	5159/2247/6401/1909/552/148/3356/5156/4908/1956/64805/2099/4915/283/4916/183/117
GO:0006940	regulation of smooth muscle contraction	55	-0.610637	-1.34986	0.0427529	0.192864	3866	tags=49%, list=21%, signal=39%	18/51196/10874/10203/152/151/2852/255743/51738/93649/5592/6865/1906/1131/148/80763/5743/1136/1907/150/6869/134/60675/9312/5021/56923/477
GO:0031295	T cell costimulation	55	0.348557	1.21574	0.0428641	0.193196	2477	tags=33%, list=13%, signal=28%	8764/3932/5133/1493/3956/1803/916/9402/6366/1445/151888/22914/10673/29851/84433/100133941/29126/126259
GO:0045165	cell fate commitment	224	-0.530761	-1.22281	0.042957	0.193279	4625	tags=48%, list=25%, signal=37%	54845/650/1482/7005/6097/5307/2114/54345/7474/6495/4855/9496/6886/5396/2260/151449/7472/56603/6911/3569/89870/51561/4854/6899/5454/64641/4086/2303/148979/5080/11281/5914/50937/596/7473/3714/3110/2737/57057/6469/2627/3398/2619/3199/2247/8643/6662/80326/6910/3170/3593/23314/440823/5629/3175/10630/4920/149233/652/7483/57453/25925/5460/367/7482/7481/54361/2263/8521/2139/8456/51384/58524/23493/26038/3…
GO:0006195	purine nucleotide catabolic process	43	0.386176	1.30756	0.0429578	0.193279	2788	tags=26%, list=15%, signal=22%	215/11332/5152/10846/100/4521/5144/11163/374659/79873/5142
GO:1900272	negative regulation of long-term synaptic potentiation	12	-0.769479	-1.42268	0.0431472	0.193792	2871	tags=50%, list=16%, signal=42%	177/348/134/5764/11170/1524
GO:1904668	positive regulation of ubiquitin protein ligase activity	12	-0.768444	-1.42077	0.0431472	0.193792	88	tags=17%, list=0%, signal=17%	5728/166979
GO:0090100	positive regulation of transmembrane receptor protein serine/threonine kinase signaling pathway	97	-0.575517	-1.30246	0.0433468	0.194518	2583	tags=27%, list=14%, signal=23%	7042/652/2662/392255/23090/653/494470/3624/2626/2661/7057/388585/651/116844/2660/7044/4838/2254/8200/10637/4487/2719/6664/286204/83729/3626
GO:0042471	ear morphogenesis	107	-0.570262	-1.29017	0.0433905	0.194544	3919	tags=48%, list=21%, signal=38%	115908/57216/124590/7849/6899/1750/51804/2535/26018/51168/3638/3199/1749/6662/6935/2048/2637/9241/10083/5629/125488/4920/1906/9368/9620/9423/10804/2263/579/53904/219736/8557/7545/259236/89780/2487/130497/1301/10736/145258/140469/2254/84189/55584/2625/5076/4487/1280/2255/525/2299
GO:1904892	regulation of receptor signaling pathway via STAT	102	-0.569178	-1.28719	0.0434343	0.194571	2834	tags=22%, list=15%, signal=18%	338376/3593/149233/2690/2261/8784/3572/8995/2056/388585/116379/5979/9244/2322/2066/3952/5618/11122/50604/183/3263/2147
GO:1900274	regulation of phospholipase C activity	43	-0.635952	-1.37078	0.0437567	0.195844	3173	tags=40%, list=17%, signal=33%	5159/2247/6401/1909/552/148/3356/5156/4908/1956/64805/2099/4915/283/4916/183/117
GO:0060688	regulation of morphogenesis of a branching structure	54	-0.614189	-1.35606	0.0437956	0.195847	4403	tags=54%, list=24%, signal=41%	7474/6495/6474/2260/7472/53335/7849/655/51804/3082/2252/7124/6469/6662/23213/9241/652/367/7482/120892/2263/30812/59277/10736/2099/3975/5076/2255/183
GO:0031214	biomineral tissue development	140	-0.551087	-1.25745	0.044044	0.196301	3709	tags=39%, list=20%, signal=32%	3491/4015/84059/7286/655/6899/7043/1901/54757/26585/338773/5167/1277/6662/5251/4920/652/256764/7481/2261/2621/54361/5745/2263/9365/1278/5743/54084/23493/2697/8313/10117/162466/249/91461/130497/4745/4958/658/5744/7475/246/1311/54829/5764/4057/4256/3381/3952/4322/54959/401138/2719/197/433
GO:0110148	biomineralization	140	-0.551087	-1.25745	0.044044	0.196301	3709	tags=39%, list=20%, signal=32%	3491/4015/84059/7286/655/6899/7043/1901/54757/26585/338773/5167/1277/6662/5251/4920/652/256764/7481/2261/2621/54361/5745/2263/9365/1278/5743/54084/23493/2697/8313/10117/162466/249/91461/130497/4745/4958/658/5744/7475/246/1311/54829/5764/4057/4256/3381/3952/4322/54959/401138/2719/197/433
GO:0098810	neurotransmitter reuptake	26	-0.680956	-1.40649	0.0440678	0.196301	1357	tags=46%, list=7%, signal=43%	1812/1815/4842/6570/6530/1813/6512/3766/477/6532/6529/6506
GO:0001508	action potential	118	-0.565607	-1.28541	0.0440882	0.196301	3014	tags=34%, list=16%, signal=29%	2702/4923/776/6326/2859/3762/148/9722/1812/1134/775/6329/3784/6331/2697/3757/4897/6327/3745/3741/11280/948/1268/10021/55800/29119/3751/23630/1141/4915/6863/6323/6328/149461/477/54112/3736/4916/23704/3760
GO:0051588	regulation of neurotransmitter transport	126	-0.561579	-1.276	0.0440882	0.196301	3197	tags=37%, list=17%, signal=30%	2852/8600/135/8938/5071/4923/776/4129/8973/116443/6865/10815/148/3351/1812/5999/815/120892/3356/112755/9627/1815/4878/23208/1136/91683/8862/8499/4842/6857/1268/6853/10675/23025/2901/6623/1813/7476/143425/1141/10814/477/6532/140730/6529/7200
GO:0007077	mitotic nuclear envelope disassembly	12	0.608065	1.49017	0.0442882	0.196898	4791	tags=58%, list=26%, signal=43%	5579/23175/891/23399/5347/9133/7443
GO:0070071	proton-transporting two-sector ATPase complex assembly	13	-0.784828	-1.46426	0.0443639	0.196898	22	tags=15%, list=0%, signal=15%	91419/229
GO:0090192	regulation of glomerulus development	13	-0.784668	-1.46396	0.0443639	0.196898	2827	tags=77%, list=15%, signal=65%	655/5155/9241/652/80310/8710/5979/5076/7490/9370
GO:0043627	response to estrogen	67	-0.600446	-1.33887	0.0443756	0.196898	3614	tags=36%, list=20%, signal=29%	167465/7043/760/5914/3880/2737/5159/2627/7010/51738/2947/4982/1393/51083/163732/2056/5798/2660/7476/2099/6770/2625/2155/335
GO:0050830	defense response to Gram-positive bacterium	66	-0.594573	-1.32406	0.0445596	0.196915	1732	tags=26%, list=9%, signal=23%	254773/3853/5320/1672/57115/948/114771/5919/163351/84659/1755/2220/1113/5319/3929/388646/114770
GO:0015791	polyol transport	10	-0.77987	-1.40621	0.0446194	0.196915	1863	tags=50%, list=10%, signal=45%	359/364/358/115584/366
GO:0031442	positive regulation of mRNA 3'-end processing	11	0.647648	1.56741	0.0446199	0.196915	67	tags=9%, list=0%, signal=9%	64506
GO:0033189	response to vitamin A	17	-0.737703	-1.43125	0.0446321	0.196915	2251	tags=35%, list=12%, signal=31%	1592/2626/2056/57817/1543/383
GO:0090189	regulation of branching involved in ureteric bud morphogenesis	21	-0.707213	-1.41173	0.0447059	0.196915	3710	tags=52%, list=20%, signal=42%	7849/51804/6662/9241/652/7482/30812/10736/3975/5076/183
GO:0003081	regulation of systemic arterial blood pressure by renin-angiotensin	24	-0.689073	-1.41005	0.0447248	0.196915	1416	tags=42%, list=8%, signal=39%	5125/56670/1215/59272/185/5972/1066/27035/183/5345
GO:0050927	positive regulation of positive chemotaxis	24	-0.689864	-1.41167	0.0447248	0.196915	3577	tags=54%, list=19%, signal=44%	1901/2277/3576/177/1233/9048/6387/4908/7857/566/4916/2255/2155
GO:0055022	negative regulation of cardiac muscle tissue growth	24	-0.688661	-1.40921	0.0447248	0.196915	3215	tags=38%, list=17%, signal=31%	7161/6910/9241/5999/4211/2697/221476/3776/5950
GO:0061117	negative regulation of heart growth	24	-0.688661	-1.40921	0.0447248	0.196915	3215	tags=38%, list=17%, signal=31%	7161/6910/9241/5999/4211/2697/221476/3776/5950
GO:0002286	T cell activation involved in immune response	87	0.319713	1.16974	0.0448898	0.197472	2150	tags=26%, list=12%, signal=23%	3662/5873/3458/8320/51176/26253/3383/3594/3936/30009/338339/114836/3142/84695/3958/2207/4063/10892/64218/84807/2475/3109/3718
GO:0072503	cellular divalent inorganic cation homeostasis	436	-0.499876	-1.15192	0.044955	0.19759	3695	tags=31%, list=20%, signal=26%	3577/10800/51196/10874/1901/55630/540/10268/9651/9914/1003/7421/4828/783/596/799/7504/6781/255061/2696/2852/2843/5732/22953/2247/51738/4923/3709/776/1909/9256/1233/1906/2859/10563/1235/552/2846/7222/7070/7781/1903/148/6261/3351/1812/930/2847/348/5745/3356/187/775/4489/6387/5729/1232/5731/2151/2904/1815/57007/8811/5158/2697/84239/9001/1258/728215/2056/773/5156/57419/64072/3270/6543/2840/1907/38712…
GO:0043486	histone exchange	52	0.35931	1.25438	0.045134	0.198207	3662	tags=35%, list=20%, signal=28%	8367/8365/55839/121504/79019/8294/8370/8360/201254/79172/55355/55929/80152/4678/8363/57082/1058/8607
GO:0030282	bone mineralization	106	-0.570185	-1.29068	0.0453629	0.199042	4639	tags=48%, list=25%, signal=36%	9636/7071/55787/650/144347/4146/55512/7123/3491/4015/84059/7286/655/7043/1901/26585/338773/5167/6662/5251/4920/652/7481/2261/54361/5745/2263/9365/1278/5743/2697/8313/162466/91461/130497/4745/4958/658/5744/246/1311/54829/5764/4057/4256/3381/3952/4322/2719/197/433
GO:0021534	cell proliferation in hindbrain	16	-0.744391	-1.42262	0.0455105	0.199195	3185	tags=50%, list=17%, signal=41%	64211/6469/22809/2637/51286/3975/6532/9283
GO:0051412	response to corticosterone	16	-0.741898	-1.41786	0.0455105	0.199195	1522	tags=44%, list=8%, signal=40%	4129/552/4747/6770/7054/4916/7200
GO:0034142	toll-like receptor 4 signaling pathway	34	-0.649928	-1.3791	0.0455531	0.199195	2243	tags=18%, list=12%, signal=16%	57402/9865/4057/92747/3929/9971
GO:0048566	embryonic digestive tract development	34	-0.650101	-1.37947	0.0455531	0.199195	3295	tags=50%, list=18%, signal=41%	7124/2737/6469/3398/3576/7042/5125/2263/5156/91461/10736/6343/5919/3549/2254/6664/2255
GO:1905874	regulation of postsynaptic density organization	14	-0.749784	-1.39907	0.0456853	0.1995	1070	tags=36%, list=6%, signal=34%	5789/26045/4916/9378/347730
GO:0098868	bone growth	42	-0.635336	-1.36954	0.0457447	0.1995	3441	tags=45%, list=19%, signal=37%	1303/5914/6781/85301/81578/1293/2261/8785/7373/2263/340706/4880/51435/1311/3953/4148/5212/3952/4322
GO:0098659	inorganic cation import across plasma membrane	79	-0.585316	-1.31435	0.0457782	0.1995	2823	tags=34%, list=15%, signal=29%	51305/3772/6559/3767/285335/3762/389015/728215/3757/6550/25800/478/284525/479/10021/6547/3766/3761/486/6557/283375/477/3773/480/1261/482/3760
GO:0099587	inorganic ion import across plasma membrane	79	-0.585316	-1.31435	0.0457782	0.1995	2823	tags=34%, list=15%, signal=29%	51305/3772/6559/3767/285335/3762/389015/728215/3757/6550/25800/478/284525/479/10021/6547/3766/3761/486/6557/283375/477/3773/480/1261/482/3760
GO:0016485	protein processing	199	-0.531631	-1.22313	0.045954	0.199927	1946	tags=16%, list=11%, signal=15%	56265/7057/119587/10699/27344/1215/85409/5653/1311/1510/10418/3549/59272/199713/6447/26085/151516/2903/5972/1066/6900/5122/2161/3818/2266/55908/2244/5345/1361/2243/2155/350
GO:0032868	response to insulin	253	-0.523785	-1.20418	0.045954	0.199927	2177	tags=13%, list=12%, signal=12%	9365/51083/340706/3291/4878/1154/2888/3645/4023/375704/2645/5919/2822/5798/2660/534/493829/6121/3795/3952/6770/5319/145264/5207/5105/525/5313/3481/183/9971/5009/9370/3484/197
GO:0006779	porphyrin-containing compound biosynthetic process	25	0.484368	1.468	0.046	0.199957	4924	tags=56%, list=27%, signal=41%	2235/706/7389/3145/402055/1371/10058/51629/211/1355/2395/55316/4779/7390
GO:0031529	ruffle organization	51	0.366878	1.28411	0.0461214	0.200287	2189	tags=25%, list=12%, signal=23%	26228/22871/146206/26084/29887/3383/6366/51763/57175/2475/3265/54849/23603
GO:0010574	regulation of vascular endothelial growth factor production	32	-0.659276	-1.3853	0.0461538	0.200287	2939	tags=44%, list=16%, signal=37%	2324/3569/284340/57447/23213/55959/2626/3572/5743/3552/718/4838/727/27035
GO:0032925	regulation of activin receptor signaling pathway	23	-0.696154	-1.40658	0.0465116	0.201669	4255	tags=52%, list=23%, signal=40%	91/4092/9863/6469/168002/10468/199699/1761/4838/3547/2254/2255
GO:0030865	cortical cytoskeleton organization	48	0.354968	1.22205	0.0467188	0.202319	1920	tags=23%, list=10%, signal=21%	22871/23136/23433/7456/112464/7454/752/1020/27183/11113/644150
GO:0014866	skeletal myofibril assembly	16	-0.737126	-1.40873	0.0467405	0.202319	2748	tags=62%, list=15%, signal=53%	5629/9172/8557/7273/127294/56203/8736/4606/70/58
GO:0050862	positive regulation of T cell receptor signaling pathway	14	0.612425	1.59067	0.0468089	0.202445	3603	tags=43%, list=20%, signal=34%	3932/100/3783/9840/10666/975
GO:0042220	response to cocaine	43	-0.633796	-1.36613	0.0469584	0.20292	2972	tags=37%, list=16%, signal=31%	6531/3176/1393/3351/1812/5999/3356/1815/1268/27092/1394/1813/5021/1141/3359/6529
GO:0016338	calcium-independent cell-cell adhesion via plasma membrane cell-adhesion molecules	21	-0.706012	-1.40933	0.0470588	0.203183	2628	tags=52%, list=14%, signal=45%	1365/49861/9071/23562/5010/9075/9080/149461/9074/51208/10686
GO:0043928	exonucleolytic catabolism of deadenylated mRNA	33	0.419155	1.33134	0.0476134	0.205257	4695	tags=42%, list=26%, signal=32%	28960/80153/54512/6499/23644/115024/56915/5393/51690/23016/118460/23404/219988/80349
GO:0015908	fatty acid transport	88	-0.57516	-1.29671	0.047619	0.205257	2278	tags=25%, list=12%, signal=22%	348/80763/28965/1815/7057/11001/5320/286256/948/4843/1813/3952/56923/5319/64600/160728/10998/8529/7069/2168/84647/1579
GO:0051304	chromosome separation	86	0.324078	1.21899	0.0476884	0.205384	4674	tags=40%, list=25%, signal=30%	23310/8379/29781/10459/990/9232/9212/81620/201254/158401/472/891/10460/164045/4292/9787/84861/701/991/146956/51433/699/23397/10403/7156/5347/25906/1459/5518/84464/378708/9700/80198/1062
GO:0061351	neural precursor cell proliferation	142	-0.548741	-1.25197	0.048048	0.206759	3315	tags=28%, list=18%, signal=23%	50937/2737/64211/6469/22809/3398/2637/5629/57540/3400/10818/9048/120892/2263/7832/644943/2047/89780/57165/5803/116/5764/2018/51286/6496/131405/1813/7476/7101/4036/3642/3975/1524/5455/283375/3736/2173/6532/9283/429
GO:0071599	otic vesicle development	14	-0.747634	-1.39506	0.0482233	0.20734	2926	tags=57%, list=16%, signal=48%	6662/5629/2263/219736/8557/2625/1280/2255
GO:0006858	extracellular transport	27	-0.670097	-1.38989	0.048369	0.207792	1987	tags=63%, list=11%, signal=56%	55582/27148/26256/8481/53340/161582/25981/8701/8382/55036/220136/23639/55811/200162/123872/83853/361
GO:1904889	regulation of excitatory synapse assembly	13	-0.778401	-1.45227	0.0484339	0.207897	1070	tags=46%, list=6%, signal=43%	5789/26045/7476/4916/9378/347730
GO:0046632	alpha-beta T cell differentiation	98	0.311328	1.20159	0.0485264	0.208119	2167	tags=29%, list=12%, signal=25%	3662/3707/864/3458/7704/26279/257101/8320/51176/7535/3594/100/30009/114836/3142/84695/54440/8943/4063/10892/64218/3659/84807/3702/2475/159296/3718/9308
GO:0110111	negative regulation of animal organ morphogenesis	34	-0.647872	-1.37474	0.0488069	0.208894	3710	tags=50%, list=20%, signal=40%	7849/655/2303/26585/7124/596/23213/9241/7042/652/4982/1735/54829/2625/5076/1101/1361
GO:0009954	proximal/distal pattern formation	31	-0.655157	-1.37234	0.0488346	0.208894	2089	tags=35%, list=11%, signal=32%	153572/1746/79191/130497/388585/2019/5087/6496/4838/79192/2255
GO:0097064	ncRNA export from nucleus	38	0.406204	1.33137	0.0488613	0.208894	10930	tags=100%, list=59%, signal=41%	9688/6396/23511/10762/100101267/9883/23225/65083/23165/8021/7248/23636/5901/81929/348995/4869/8086/4928/55706/4927/79023/5903/9631/9972/23279/9818/79902/6741/8480/11260/51808/57122/11097/53371/129401/7175/22916/55746
GO:0009084	glutamine family amino acid biosynthetic process	18	-0.726484	-1.42055	0.048926	0.208894	1733	tags=28%, list=9%, signal=25%	2752/27165/6507/1373/5009
GO:0048638	regulation of developmental growth	304	-0.513285	-1.18233	0.048951	0.208894	3290	tags=27%, list=18%, signal=23%	596/7473/80128/7161/57057/2627/5071/83481/2247/51738/6531/151835/6405/7093/6910/203447/9241/84258/2307/5629/1906/127833/652/2690/367/56920/80031/9423/2261/4803/348/5999/2263/6387/4211/374946/9723/51083/23493/2697/89780/23414/57611/1735/4897/158376/4880/9254/221476/91584/6423/3776/7429/6857/9362/1630/58529/54437/1382/2660/23025/8153/1002/57817/1813/5967/4137/2254/2066/3952/8200/4099/4916/85407/653…
GO:0090257	regulation of muscle system process	216	-0.526391	-1.21311	0.048951	0.208894	4004	tags=40%, list=22%, signal=32%	10008/389524/5058/3728/3673/29995/2946/4092/2309/5318/5350/1490/487/18/90523/7168/3759/1832/51196/10874/10203/152/151/6781/2852/255743/2702/51738/93649/7138/5592/6865/1906/1131/7222/148/9722/5999/775/80763/2626/6329/3572/5743/3784/6331/9464/126393/4878/1136/3270/1907/150/3488/7134/7139/6869/221476/85366/134/4842/7135/60675/10021/59272/2660/7136/844/845/6547/9312/57817/140628/29119/4634/4625/7125/…
GO:0048286	lung alveolus development	41	-0.637366	-1.36864	0.0491453	0.209549	4510	tags=46%, list=25%, signal=35%	3202/64220/55512/2324/2294/7043/9394/2627/93649/26154/652/2263/1907/3488/91461/7080/6441/2255/5241
GO:0043950	positive regulation of cAMP-mediated signaling	16	-0.733625	-1.40204	0.0492005	0.20961	2215	tags=44%, list=12%, signal=39%	118442/4842/1394/6343/116/6344/117

## Sheet: REACTOM
ID	Description	setSize	enrichmentScore	NES	pvalue	FDR	rank	leading_edge	core_enrichment(ENTREZID)
R-HSA-76002	Platelet activation, signaling and aggregation	250	-0.609739	-1.39895	0.000999001	0.0228803	1710	tags=14%, list=9%, signal=13%	150/10451/7066/80739/2162/5196/948/7273/1191/2785/5919/88/12/7044/64805/1607/2153/29106/3700/5265/2266/5005/5267/3481/1/2244/5345/5004/7018/2243/213/3699/197/2147/335/350
R-HSA-211859	Biological oxidations	185	-0.740933	-1.6926	0.000999001	0.0228803	2044	tags=36%, list=11%, signal=32%	2944/6817/1592/57412/2326/2327/1591/27284/4051/6799/5742/1583/1588/2052/27306/27233/1562/10/1589/26/1580/167127/1572/218/6783/1577/126410/1555/11283/7367/54575/1066/7364/79799/219970/1543/126/9/131/54658/54905/8529/2939/130/125/2328/13/1576/1800/54577/127/2938/1565/54988/1571/9971/4143/1579/1551/10720/7366/1559/1558/1582/1548/7363
R-HSA-397014	Muscle contraction	190	-0.653213	-1.49438	0.000999001	0.0228803	2966	tags=42%, list=16%, signal=35%	3709/776/7138/6910/80333/6326/51305/56660/3767/7111/6261/815/775/2626/6329/3784/6331/56659/8557/778/4878/59283/10699/6543/54207/55799/3757/7134/6327/7139/53828/11280/4880/9254/7273/478/3776/4842/89822/6263/7135/53826/5348/53822/27092/4881/88/4703/2259/7136/844/845/55800/6547/29895/10345/4634/3751/493829/7125/3761/486/23630/786/4606/60598/6588/70/6323/6328/477/30820/23704/59285/7140/480/58/491/482
R-HSA-112316	Neuronal System	363	-0.581739	-1.33653	0.000999001	0.0228803	2886	tags=33%, list=16%, signal=28%	3786/8973/43/51305/9256/3772/116443/3767/55879/347688/58512/127833/3762/10815/5789/83988/2743/3788/815/1134/81539/57502/3784/2904/56659/3748/7846/773/2571/1136/9379/59283/116444/91683/54207/8825/55799/23416/2752/3757/57030/2561/50944/6539/3745/3741/3782/4747/9254/347733/3084/8499/79861/3776/6857/89822/94030/3742/6853/1146/6854/2785/27092/2905/10021/57497/27165/88/26045/6540/113457/2901/2555/9312/…
R-HSA-373076	Class A/1 (Rhodopsin-like receptors)	242	-0.590314	-1.35271	0.000999001	0.0228803	3842	tags=49%, list=21%, signal=39%	1238/27199/84432/9890/3577/10800/2863/10874/5443/2920/56413/1901/53637/1132/4828/57121/152/151/7504/2852/6361/5732/135/84634/3576/51738/4923/5029/338557/6753/1909/5473/6866/1233/6865/1906/2859/146/10563/1235/552/1131/2798/2846/6372/1903/148/56670/3355/3351/1812/2847/6751/3356/187/6387/5729/1232/51083/5731/2831/2151/3363/1815/57007/6364/8811/2840/1907/27198/11251/150/387129/6869/6755/64106/8862/51…
R-HSA-375276	Peptide ligand-binding receptors	146	-0.643941	-1.46346	0.000999001	0.0228803	3254	tags=46%, list=18%, signal=38%	7504/2852/6361/84634/3576/51738/4923/6753/1909/5473/6866/1233/6865/1906/10563/1235/552/6372/2847/6751/187/6387/1232/51083/2831/2151/57007/6364/8811/1907/387129/6869/6755/64106/8862/5196/59350/3814/60675/339403/6288/283869/27202/185/718/2922/10886/5021/887/5368/5179/56923/6863/6752/1908/1524/2925/6370/5697/727/6750/9283/4922/183/4886/7200/2147
R-HSA-418594	G alpha (i) signalling events	320	-0.599875	-1.37735	0.000999001	0.0228803	2613	tags=28%, list=14%, signal=25%	6003/10563/1235/8490/6372/1903/56670/3355/131890/83756/3351/2847/2239/5947/348/5999/815/6751/10170/187/6387/1232/51083/5332/2831/5153/1815/57007/6364/8811/83875/5158/1258/2917/2840/27198/2262/11251/150/4023/6755/8862/5196/5137/57016/9628/134/1268/126006/2785/339403/165140/6288/283869/718/1645/64805/24/6000/5733/5368/9568/6121/2914/2918/5179/56923/8630/4036/6752/1524/121214/26166/5948/6370/2719/56…
R-HSA-500792	GPCR ligand binding	339	-0.597749	-1.37166	0.000999001	0.0228803	3701	tags=48%, list=20%, signal=39%	2912/3577/10800/2863/10874/5443/2920/56413/8321/1901/2535/53637/10268/1132/10203/4828/57121/152/151/7473/799/7504/2696/2852/6361/6469/2916/5732/135/50832/84634/10266/3576/51738/4923/5029/338557/8643/11211/80326/6753/1909/5473/6866/1233/6865/1906/2859/146/10563/7483/1235/552/1131/2798/8325/7482/2846/7481/6372/1393/1903/148/56670/3355/83756/3351/1812/2847/6751/54361/5745/3356/187/6387/5729/1232/510…
R-HSA-196854	Metabolism of vitamins and cofactors	179	-0.609871	-1.3921	0.000999001	0.0228803	1013	tags=17%, list=6%, signal=16%	2239/5947/348/5743/23057/80704/83875/2262/4023/57016/6947/1645/5169/8876/4036/160728/10840/5948/5644/2719/7274/316/55937/344/1582/1109/338/7276/335/5950
R-HSA-112315	Transmission across Chemical Synapses	240	-0.600918	-1.37698	0.000999001	0.0228803	2857	tags=32%, list=16%, signal=27%	8973/43/9256/3772/116443/55879/347688/3762/10815/83988/2743/815/1134/81539/2904/7846/773/2571/1136/59283/116444/8825/55799/2752/57030/2561/6539/4747/9254/347733/3084/8499/79861/6857/6853/1146/6854/2785/27092/2905/27165/88/6540/113457/2901/2555/2558/2897/6511/2903/4137/6512/3766/3761/9568/6507/2066/55584/1141/777/2900/6616/2899/3773/112714/8001/6532/2892/2893/3359/6580/6529/6506/3760/2890/2891
R-HSA-425407	SLC-mediated transmembrane transport	223	-0.598454	-1.37248	0.000999001	0.0228803	2392	tags=29%, list=13%, signal=25%	7781/389015/6564/81539/144195/6523/353189/28965/30061/57419/345274/9843/6543/57030/6539/286256/6550/25800/6534/6519/115584/57127/6542/6528/29986/9153/6570/115019/9498/200010/6540/6530/85413/146802/6547/55244/115111/6511/11136/6512/8170/6507/83733/57282/25769/55867/56301/53919/160728/6557/283375/51458/6580/1811/55089/6529/55532/284111/169026/9154/6506/9058/213/10991
R-HSA-114608	Platelet degranulation	124	-0.719111	-1.63269	0.001	0.0228803	1549	tags=23%, list=8%, signal=21%	2162/5196/948/7273/1191/5919/88/12/7044/2153/29106/3700/5265/2266/5005/5267/3481/1/2244/5345/5004/7018/2243/213/3699/197/335/350
R-HSA-76005	Response to elevated platelet cytosolic Ca2+	129	-0.715653	-1.62615	0.001	0.0228803	1549	tags=22%, list=8%, signal=20%	2162/5196/948/7273/1191/5919/88/12/7044/2153/29106/3700/5265/2266/5005/5267/3481/1/2244/5345/5004/7018/2243/213/3699/197/335/350
R-HSA-5576891	Cardiac conduction	131	-0.675321	-1.5351	0.001	0.0228803	2966	tags=47%, list=16%, signal=39%	3709/776/6910/80333/6326/51305/56660/3767/6261/815/775/2626/6329/3784/6331/56659/778/4878/59283/10699/6543/54207/55799/3757/6327/53828/11280/4880/9254/478/3776/4842/89822/6263/53826/5348/53822/27092/4881/2259/844/845/55800/6547/10345/3751/3761/486/23630/786/60598/6588/6323/6328/477/30820/23704/59285/480/491/482
R-HSA-381426	Regulation of Insulin-like Growth Factor (IGF) transport and uptake by Insulin-like Growth Factor Binding Proteins (IGFBPs)	114	-0.735133	-1.66202	0.001001	0.0228803	1006	tags=26%, list=5%, signal=25%	718/3483/4148/26085/5179/2153/1114/401138/80341/2719/29106/8614/147111/5265/2266/3481/5624/51156/7018/3484/2243/213/3698/462/3053/174/197/338/2147/335
R-HSA-8957275	Post-translational protein phosphorylation	98	-0.763396	-1.72388	0.00100402	0.0228803	1006	tags=27%, list=5%, signal=25%	718/4148/5179/2153/1114/401138/80341/2719/29106/8614/147111/5265/2266/5624/51156/7018/3484/2243/213/3698/462/3053/174/197/338/335
R-HSA-211945	Phase I - Functionalization of compounds	93	-0.766765	-1.73177	0.00100402	0.0228803	2044	tags=42%, list=11%, signal=37%	2326/2327/1591/4051/5742/1583/1588/2052/1562/1589/26/1580/1572/218/1577/126410/1555/11283/1066/1543/126/131/54905/8529/130/125/2328/13/1576/127/1565/1571/9971/1579/1551/1559/1558/1582/1548
R-HSA-156580	Phase II - Conjugation of compounds	85	-0.713713	-1.60305	0.00100807	0.0228803	2293	tags=29%, list=12%, signal=26%	2944/6817/57412/27284/6799/27306/27233/10/167127/6783/7367/54575/7364/79799/219970/9/54658/2939/54577/2938/54988/4143/10720/7366/7363
R-HSA-2187338	Visual phototransduction	84	-0.701756	-1.57565	0.00100807	0.0228803	2358	tags=32%, list=13%, signal=28%	131890/2239/5947/348/10170/83875/5158/1258/2262/4023/57016/1645/24/6121/8630/4036/121214/5948/2719/8608/55937/344/1109/338/7276/335/5950
R-HSA-6805567	Keratinization	78	-0.80496	-1.79878	0.00101215	0.0228803	2014	tags=60%, list=11%, signal=54%	85285/9333/3872/2312/3853/3889/3892/3858/7062/387273/3881/3868/11202/3846/3866/5266/286887/125115/43849/11005/26085/3861/3857/3882/3860/3854/3713/25984/6700/1475/7051/3848/23581/6698/6703/9119/43847/6704/6705/6699/1823/6707/1828/196374/1041/25818/3887
R-HSA-6809371	Formation of the cornified envelope	74	-0.806943	-1.79928	0.00101317	0.0228803	2011	tags=59%, list=11%, signal=53%	9333/3872/2312/3853/3889/3892/3858/7062/3881/3868/11202/3866/5266/286887/125115/43849/11005/26085/3861/3857/3882/3860/3854/3713/25984/6700/1475/7051/3848/23581/6698/6703/9119/43847/6704/6705/6699/1823/6707/1828/196374/1041/25818/3887
R-HSA-174824	Plasma lipoprotein assembly, remodeling, and clearance	63	-0.774133	-1.7129	0.00102041	0.0228803	720	tags=21%, list=4%, signal=20%	319/8435/63924/3990/341/27329/4547/84699/55908/344/213/338/335
R-HSA-211897	Cytochrome P450 - arranged by substrate type	54	-0.80819	-1.77617	0.00102881	0.0228803	1956	tags=46%, list=11%, signal=41%	1591/4051/1583/1588/1562/1589/1580/1572/1577/126410/1555/11283/1543/54905/8529/1576/1565/1571/9971/1579/1551/1559/1558/1582/1548
R-HSA-166658	Complement cascade	46	-0.807697	-1.76691	0.00103842	0.0228803	1403	tags=46%, list=8%, signal=42%	721/720/629/1191/78989/27202/718/10584/3075/2220/727/722/725/10878/10747/733/1361/729/2147/1370/7448
R-HSA-9024446	NR1H2 and NR1H3-mediated signaling	45	-0.79636	-1.7349	0.00104275	0.0228803	384	tags=16%, list=2%, signal=15%	5346/341/5105/64240/27329/344/64241
R-HSA-6806667	Metabolism of fat-soluble vitamins	43	-0.767865	-1.67011	0.00104384	0.0228803	2300	tags=44%, list=13%, signal=39%	2239/5947/348/83875/2262/4023/57016/1645/4036/5948/2719/7274/55937/344/1109/338/7276/335/5950
R-HSA-2173782	Binding and Uptake of Ligands by Scavenger Receptors	41	-0.772053	-1.67476	0.00104932	0.0228803	1507	tags=29%, list=8%, signal=27%	3043/948/3039/78989/117156/6288/213/3240/3263/338/335/259
R-HSA-194068	Bile acid and bile salt metabolism	38	-0.753849	-1.62837	0.00105042	0.0228803	1901	tags=37%, list=10%, signal=33%	10858/9023/2172/8309/11001/1646/1645/10998/570/8647/9971/213/1582/1109
R-HSA-975634	Retinoid metabolism and transport	39	-0.768188	-1.659	0.00105042	0.0228803	2300	tags=46%, list=13%, signal=40%	2239/5947/348/83875/2262/4023/57016/1645/4036/5948/2719/55937/344/1109/338/7276/335/5950
R-HSA-977606	Regulation of Complement cascade	37	-0.818957	-1.76118	0.0010582	0.0228803	2013	tags=46%, list=11%, signal=41%	721/720/629/1191/27202/718/3075/727/722/725/10878/733/1361/729/2147/1370/7448
R-HSA-163841	Gamma carboxylation, hypusine formation and arylsulfatase activation	37	-0.763268	-1.64142	0.0010582	0.0228803	254	tags=19%, list=1%, signal=19%	415/2621/8858/5624/2159/2155/2147
R-HSA-6803157	Antimicrobial peptides	36	-0.813438	-1.74553	0.00106383	0.0228803	1605	tags=53%, list=9%, signal=48%	5320/6280/1672/57115/1191/114771/6279/4057/338324/6278/5266/84659/92747/1113/80341/55600/5645/116842/114770
R-HSA-9029569	NR1H3 & NR1H2 regulate gene expression linked to cholesterol transport and efflux	36	-0.76966	-1.65159	0.00106383	0.0228803	267	tags=14%, list=1%, signal=14%	348/341/64240/344/64241
R-HSA-192105	Synthesis of bile acids and bile salts	32	-0.756703	-1.60301	0.00107991	0.0228803	1901	tags=31%, list=10%, signal=28%	8309/11001/1646/1645/10998/570/8647/9971/1582/1109
R-HSA-140877	Formation of Fibrin Clot (Clotting Cascade)	31	-0.848645	-1.78944	0.00108578	0.0228803	593	tags=42%, list=3%, signal=41%	5104/2153/2161/3818/2266/5624/2159/2244/2243/462/3053/2155/2147
R-HSA-420092	Glucagon-type ligand receptors	28	-0.762105	-1.59605	0.00109409	0.0228803	1444	tags=36%, list=8%, signal=33%	9340/7434/2785/6343/2740/116/6344/7432/2642/117
R-HSA-8963899	Plasma lipoprotein remodeling	26	-0.8475	-1.74215	0.00111607	0.0228803	720	tags=38%, list=4%, signal=37%	319/63924/3990/27329/84699/55908/344/213/338/335
R-HSA-438066	Unblocking of NMDA receptors, glutamate binding and activation	23	-0.781549	-1.59572	0.00112233	0.0228803	2263	tags=43%, list=12%, signal=38%	815/2904/4747/2905/88/2903/2892/2893/2890/2891
R-HSA-193368	Synthesis of bile acids and bile salts via 7alpha-hydroxycholesterol	22	-0.822541	-1.6641	0.0011274	0.0228803	1901	tags=45%, list=10%, signal=41%	8309/11001/1646/1645/10998/570/8647/9971/1582/1109
R-HSA-2453902	The canonical retinoid cycle in rods (twilight vision)	19	-0.803854	-1.60795	0.00116414	0.0228803	821	tags=37%, list=4%, signal=35%	24/6121/8630/121214/8608/7276/5950
R-HSA-5686938	Regulation of TLR by endogenous ligand	19	-0.856573	-1.71341	0.00116414	0.0228803	1556	tags=58%, list=8%, signal=53%	6280/948/6279/6441/729238/653509/3929/2266/2244/2243/338
R-HSA-140875	Common Pathway of Fibrin Clot Formation	19	-0.864197	-1.72866	0.00116414	0.0228803	593	tags=63%, list=3%, signal=61%	2162/5196/5104/2153/2266/5624/2159/2244/2243/462/3053/2147
R-HSA-211981	Xenobiotics	18	-0.915731	-1.8282	0.00117096	0.0228803	724	tags=72%, list=4%, signal=69%	1562/1572/1577/1555/1543/54905/1576/1565/1571/1551/1559/1558/1548
R-HSA-2142691	Synthesis of Leukotrienes (LT) and Eoxins (EX)	18	-0.821568	-1.64021	0.00117096	0.0228803	1908	tags=44%, list=10%, signal=40%	4051/246/1580/126410/11283/8529/1800/1579
R-HSA-416993	Trafficking of GluR2-containing AMPA receptors	17	-0.859759	-1.69261	0.00118343	0.0228803	332	tags=24%, list=2%, signal=23%	2892/2893/2890/2891
R-HSA-9018678	Biosynthesis of specialized proresolving mediators (SPMs)	17	-0.871636	-1.71599	0.00118343	0.0228803	353	tags=41%, list=2%, signal=40%	246/1543/1576/1565/1571/1559/1558
R-HSA-140837	Intrinsic Pathway of Fibrin Clot Formation	17	-0.871281	-1.7153	0.00118343	0.0228803	593	tags=47%, list=3%, signal=46%	5104/2161/3818/5624/2159/462/3053/2147
R-HSA-8963889	Assembly of active LPL and LIPC lipase complexes	16	-0.840222	-1.64228	0.00119048	0.0228803	425	tags=56%, list=2%, signal=55%	5125/5046/4023/63924/3990/27329/84699/55908/344
R-HSA-156588	Glucuronidation	15	-0.920678	-1.78388	0.00119617	0.0228803	754	tags=67%, list=4%, signal=64%	167127/7367/54575/7364/79799/54658/54577/10720/7366/7363
R-HSA-372708	p130Cas linkage to MAPK signaling for integrins	15	-0.856078	-1.65871	0.00119617	0.0228803	159	tags=27%, list=1%, signal=26%	2335/2266/2244/2243
R-HSA-9018677	Biosynthesis of DHA-derived SPMs	15	-0.880078	-1.70521	0.00119617	0.0228803	353	tags=47%, list=2%, signal=46%	246/1543/1576/1565/1571/1559/1558
R-HSA-354194	GRB2:SOS provides linkage to MAPK signaling for Integrins	15	-0.863703	-1.67348	0.00119617	0.0228803	159	tags=27%, list=1%, signal=26%	2335/2266/2244/2243
R-HSA-8963898	Plasma lipoprotein assembly	14	-0.926838	-1.76749	0.00120482	0.0228803	267	tags=43%, list=1%, signal=42%	348/341/4547/344/338/335
R-HSA-159418	Recycling of bile acids and salts	13	-0.907522	-1.70905	0.00121951	0.0228803	464	tags=46%, list=3%, signal=45%	2172/10998/570/8647/9971/213
R-HSA-211935	Fatty acids	12	-0.876813	-1.62784	0.00123457	0.0228803	953	tags=75%, list=5%, signal=71%	4051/1580/1572/126410/1555/11283/8529/1565/1579
R-HSA-2168880	Scavenging of heme from plasma	12	-0.909363	-1.68827	0.00123457	0.0228803	43	tags=58%, list=0%, signal=58%	3043/3039/213/3240/3263/335/259
R-HSA-71384	Ethanol oxidation	11	-0.914137	-1.66702	0.00125945	0.0228803	302	tags=45%, list=2%, signal=45%	126/131/130/125/127
R-HSA-8963691	Phenylalanine and tyrosine metabolism	11	-0.918689	-1.67532	0.00125945	0.0228803	132	tags=36%, list=1%, signal=36%	3081/3242/5053/6898
R-HSA-159854	Gamma-carboxylation, transport, and amino-terminal cleavage of proteins	10	-0.941609	-1.69942	0.00128205	0.0228962	254	tags=60%, list=1%, signal=59%	2621/8858/5624/2159/2155/2147
R-HSA-1474244	Extracellular matrix organization	288	-0.561539	-1.28903	0.001998	0.0338413	3665	tags=38%, list=20%, signal=31%	6385/4052/131873/3914/50848/7043/633/780/5155/3691/1303/1511/1295/6382/1515/1289/7837/2331/6678/2247/1277/7412/11096/4053/7093/85301/81578/4237/1287/22795/1293/1302/4239/84570/7148/7042/652/1281/1462/8038/1305/176/1634/2199/4060/1288/8785/7373/91522/5654/7092/2202/2200/1278/3908/1290/7057/147968/22801/84467/11095/4016/58494/1308/388743/1299/92291/59277/2006/1301/84290/440854/10753/1296/4316/1215/…
R-HSA-5668914	Diseases of metabolism	94	-0.645455	-1.45702	0.00201005	0.0338413	1123	tags=19%, list=6%, signal=18%	1591/1583/1588/6476/1589/6441/3795/126410/1586/729238/6440/653509/6439/54658/2328/4143/5053/229
R-HSA-5619084	ABC transporter disorders	75	-0.664945	-1.48675	0.00202225	0.0338413	1238	tags=11%, list=7%, signal=10%	1080/368/5244/6833/64240/8647/64241/335
R-HSA-425366	Transport of bile salts and organic acids, metal ions and amine compounds	73	-0.684091	-1.5201	0.00203874	0.0338413	1880	tags=34%, list=10%, signal=31%	30061/345274/9843/6539/25800/6534/115584/57127/29986/6570/6540/6530/85413/146802/55244/8170/55867/283375/51458/6580/6529/55532/284111/169026/9058
R-HSA-2142753	Arachidonic acid metabolism	53	-0.720805	-1.58319	0.0020555	0.0338413	2481	tags=38%, list=13%, signal=33%	9536/59344/5743/4051/5742/27306/246/5446/1580/242/126410/11283/1543/8529/1800/1579/5444/1559/1558/1582
R-HSA-8964043	Plasma lipoprotein clearance	32	-0.74041	-1.5685	0.00215983	0.0350119	486	tags=16%, list=3%, signal=15%	8435/3990/341/338/335
R-HSA-1614635	Sulfur amino acid metabolism	27	-0.767351	-1.5915	0.00221484	0.0353597	259	tags=22%, list=1%, signal=22%	1491/51380/635/1036/23743/4143
R-HSA-8957322	Metabolism of steroids	138	-0.617013	-1.40207	0.002997	0.0471328	2374	tags=18%, list=13%, signal=16%	2172/441282/57678/3291/1591/8309/11001/1646/1583/1588/3294/1589/1645/6770/4036/1586/10998/3290/570/8647/9971/213/1582/1109/866
R-HSA-5578775	Ion homeostasis	55	-0.687533	-1.51222	0.00308642	0.0478252	2377	tags=38%, list=13%, signal=33%	3767/6261/815/6543/53828/478/4842/6263/53826/5348/53822/844/845/6547/10345/486/6588/477/480/491/482
R-HSA-5621480	Dectin-2 family	23	-0.763758	-1.5594	0.003367	0.0514168	1438	tags=39%, list=8%, signal=36%	727897/4588/4584/4586/394263/94025/140453/10071/118430
R-HSA-5083632	Defective C1GALT1C1 causes Tn polyagglutination syndrome (TNPS)	16	-0.830112	-1.62252	0.00357143	0.0525162	1438	tags=56%, list=8%, signal=52%	727897/4588/4584/4586/394263/94025/140453/10071/118430
R-HSA-5083625	Defective GALNT3 causes familial hyperphosphatemic tumoral calcinosis (HFTC)	15	-0.834317	-1.61655	0.00358852	0.0525162	1438	tags=60%, list=8%, signal=55%	727897/4588/4584/4586/394263/94025/140453/10071/118430
R-HSA-5083636	Defective GALNT12 causes colorectal cancer 1 (CRCS1)	15	-0.835134	-1.61813	0.00358852	0.0525162	1438	tags=60%, list=8%, signal=55%	727897/4588/4584/4586/394263/94025/140453/10071/118430
R-HSA-71291	Metabolism of amino acids and derivatives	354	-0.538557	-1.23647	0.003996	0.0563656	2024	tags=13%, list=11%, signal=12%	57571/6123/389434/169355/2731/1644/1735/2752/50506/8528/6539/6534/1621/6528/8424/374569/1160/27165/2875/23498/7166/10247/1158/7054/5409/10993/6999/29958/2628/3034/144193/635/1036/23743/1373/130013/3242/4143/51268/5009/1733/10841/5053/383/6898/189
R-HSA-400206	Regulation of lipid metabolism by Peroxisome proliferator-activated receptor alpha (PPARalpha)	113	-0.617007	-1.39534	0.004004	0.0563656	1642	tags=9%, list=9%, signal=8%	50486/948/3158/5244/1543/2168/183/9971/1579/335
R-HSA-1989781	PPARA activates gene expression	111	-0.618661	-1.39745	0.00401204	0.0563656	1642	tags=9%, list=9%, signal=8%	50486/948/3158/5244/1543/2168/183/9971/1579/335
R-HSA-5683826	Surfactant metabolism	25	-0.743282	-1.52968	0.00443459	0.0606839	3324	tags=52%, list=18%, signal=43%	152/2627/135/5029/21/150/1755/6441/729238/6440/653509/6439/9476
R-HSA-9620244	Long-term potentiation	25	-0.747164	-1.53767	0.00443459	0.0606839	2263	tags=40%, list=12%, signal=35%	815/2904/4747/3084/2905/88/2903/2066/2890/2891
R-HSA-8948216	Collagen chain trimerization	43	-0.685661	-1.49132	0.00521921	0.0705051	3638	tags=58%, list=20%, signal=47%	131873/1303/1295/1289/1277/85301/81578/1287/1293/1302/84570/1281/1305/1288/7373/91522/1278/1290/1308/1299/1301/1296/1300/1297/1280
R-HSA-354192	Integrin alphaIIb beta3 signaling	27	-0.74186	-1.53863	0.0055371	0.0729294	159	tags=15%, list=1%, signal=15%	11069/2266/2244/2243
R-HSA-9006921	Integrin signaling	27	-0.74186	-1.53863	0.0055371	0.0729294	159	tags=15%, list=1%, signal=15%	11069/2266/2244/2243
R-HSA-69166	Removal of the Flap Intermediate	14	0.679252	1.85327	0.00581395	0.0756305	3149	tags=43%, list=17%, signal=36%	5558/2237/5425/5424/57804/6117
R-HSA-69183	Processive synthesis on the lagging strand	15	0.693241	1.90938	0.0060241	0.0764758	3149	tags=47%, list=17%, signal=39%	5558/2237/5425/3978/5424/57804/6117
R-HSA-209776	Metabolism of amine-derived hormones	14	-0.826431	-1.57601	0.0060241	0.0764758	1913	tags=71%, list=10%, signal=64%	389434/1644/1735/50506/1621/6528/7166/7054/5409/1733
R-HSA-211979	Eicosanoids	11	-0.855857	-1.56074	0.00629723	0.0789572	953	tags=73%, list=5%, signal=69%	66002/4051/1580/126410/11283/8529/1579/1582
R-HSA-202430	Translocation of ZAP-70 to Immunological synapse	17	0.815622	2.36833	0.00636943	0.0789572	2794	tags=88%, list=15%, signal=75%	3932/3123/915/7535/919/916/3117/917/3115/3127/3119/3118/3113/3122/3120
R-HSA-73780	RNA Polymerase III Chain Elongation	18	0.620445	1.76397	0.00675676	0.0827847	1918	tags=28%, list=10%, signal=25%	5435/10622/661/5434/171568
R-HSA-9613829	Chaperone Mediated Autophagy	21	-0.770147	-1.5543	0.00684151	0.0828596	1507	tags=14%, list=8%, signal=13%	3043/1080/2670
R-HSA-193807	Synthesis of bile acids and bile salts via 27-hydroxycholesterol	13	-0.831226	-1.56537	0.00731707	0.0876123	870	tags=38%, list=5%, signal=37%	1646/1645/9971/1582/1109
R-HSA-164938	Nef-mediates down modulation of cell surface receptors by recruiting them to clathrin adapters	20	0.621436	1.8116	0.00757576	0.0877193	2858	tags=40%, list=16%, signal=34%	8905/3932/926/1175/8907/162/1174/130340
R-HSA-69186	Lagging Strand Synthesis	20	0.605906	1.76633	0.00757576	0.0877193	3149	tags=35%, list=17%, signal=29%	5558/2237/5425/3978/5424/57804/6117
R-HSA-202427	Phosphorylation of CD3 and TCR zeta chains	20	0.809206	2.35898	0.00757576	0.0877193	2202	tags=80%, list=12%, signal=70%	3932/55824/5795/3123/915/919/916/1445/3117/917/3115/3127/3119/3118/3113/3122
R-HSA-112314	Neurotransmitter receptors and postsynaptic signal transmission	180	-0.573124	-1.30816	0.00799201	0.0906395	2857	tags=28%, list=16%, signal=24%	8973/3772/116443/55879/347688/3762/83988/2743/815/1134/2904/7846/1136/59283/116444/8825/2561/4747/347733/3084/79861/1146/2785/27092/2905/88/113457/2901/2555/2558/2897/2903/4137/3766/3761/9568/2066/55584/1141/2900/2899/3773/112714/8001/2892/2893/3359/3760/2890/2891
R-HSA-389948	PD-1 signaling	21	0.811625	2.45482	0.008	0.0906395	2794	tags=81%, list=15%, signal=69%	3932/5133/3123/915/919/916/1445/3117/917/3115/3127/3119/3118/3113/3122/29126/3120
R-HSA-3000178	ECM proteoglycans	73	-0.635135	-1.41131	0.00815494	0.0914121	3130	tags=42%, list=17%, signal=35%	1289/2331/6678/1277/1287/1293/7148/7042/1281/1462/176/1634/4060/1288/8785/1278/3908/1290/1299/1311/54829/4684/1404/1297/4148/3381/63827/63923/1280/7143/7448
R-HSA-198753	ERK/MAPK targets	22	0.57962	1.7792	0.00869565	0.0956503	4104	tags=50%, list=22%, signal=39%	1846/5600/6196/1845/5528/6197/1848/6195/5598/5594/5518
R-HSA-167242	Abortive elongation of HIV-1 transcript in the absence of Tat	23	0.591774	1.808	0.00900901	0.0956503	4059	tags=39%, list=22%, signal=31%	5435/5434/9150/5441/2962/6829/25920/7936/5430
R-HSA-216083	Integrin cell surface interactions	84	-0.621258	-1.39491	0.00907258	0.0956503	3259	tags=33%, list=18%, signal=28%	1295/1289/1277/7412/1287/1293/1281/1305/4060/1288/91522/2200/1278/1290/7057/22801/58494/1299/1296/1311/1300/1297/3381/1280/2266/2244/2243/7448
R-HSA-2980736	Peptide hormone metabolism	77	-0.631708	-1.41138	0.00911854	0.0956503	1095	tags=19%, list=6%, signal=18%	1215/59272/2922/5972/3952/1045/3798/1066/5122/83729/169026/183/3626/1361/1360
R-HSA-8849932	Synaptic adhesion-like molecules	21	-0.761907	-1.53767	0.00912201	0.0956503	2353	tags=38%, list=13%, signal=33%	5789/2904/2905/57497/2903/2892/2893/2890
R-HSA-379716	Cytosolic tRNA aminoacylation	24	0.59191	1.83755	0.00925926	0.0956503	5377	tags=67%, list=29%, signal=47%	7453/7407/2193/3735/16/9521/3035/5859/8565/833/4141/6301/2617/3376/4677/7965
R-HSA-174417	Telomere C-strand (Lagging Strand) Synthesis	24	0.583436	1.81124	0.00925926	0.0956503	5500	tags=54%, list=30%, signal=38%	5558/2237/5425/3978/5424/57804/6117/5426/5983/23649/56655/6118/5984
R-HSA-3295583	TRP channels	24	0.528605	1.64102	0.00925926	0.0956503	1140	tags=29%, list=6%, signal=27%	79054/51393/55503/54795/55283/57192/255231
R-HSA-5654712	FRS-mediated FGFR4 signaling	16	-0.785206	-1.53474	0.00952381	0.097428	3027	tags=56%, list=16%, signal=47%	2247/8822/10818/2264/8817/2254/2246/9965/152831
R-HSA-983170	Antigen Presentation: Folding, assembly and peptide loading of class I MHC	25	0.585197	1.84885	0.01	0.0976447	4617	tags=60%, list=25%, signal=45%	6890/6891/3133/3105/3106/3107/3134/6396/811/567/3309/2923/64167/6892/51128
R-HSA-5696397	Gap-filling DNA repair synthesis and ligation in GG-NER	25	0.552414	1.74528	0.01	0.0976447	6227	tags=64%, list=34%, signal=42%	5425/3978/5424/57804/3980/6117/7311/7314/5426/5983/56655/6118/5984/5982/7515/5981
R-HSA-164952	The role of Nef in HIV-1 replication and disease pathogenesis	27	0.546431	1.80597	0.010101	0.0976447	3852	tags=41%, list=21%, signal=32%	8905/3932/919/926/1175/8907/162/1174/130340/1794/567
R-HSA-167160	RNA Pol II CTD phosphorylation and interaction with CE during HIV infection	27	0.576259	1.90455	0.010101	0.0976447	5924	tags=63%, list=32%, signal=43%	5435/2068/5434/5441/2962/6829/2968/8731/5430/902/8732/2966/2071/5436/2965/2963/5433
R-HSA-77075	RNA Pol II CTD phosphorylation and interaction with CE	27	0.576259	1.90455	0.010101	0.0976447	5924	tags=63%, list=32%, signal=43%	5435/2068/5434/5441/2962/6829/2968/8731/5430/902/8732/2966/2071/5436/2965/2963/5433
R-HSA-76066	RNA Polymerase III Transcription Initiation From Type 2 Promoter	27	0.586858	1.93958	0.010101	0.0976447	2865	tags=30%, list=16%, signal=25%	5435/10622/661/2975/5434/171568/9328/5441
R-HSA-112310	Neurotransmitter release cycle	45	-0.679192	-1.47964	0.0104275	0.0998847	1883	tags=38%, list=10%, signal=34%	2571/8825/57030/6539/8499/6857/6853/6854/27165/6540/6511/6512/6507/6616/6580/6529/6506
R-HSA-5423646	Aflatoxin activation and detoxification	16	-0.783226	-1.53088	0.0107143	0.101707	675	tags=31%, list=4%, signal=30%	246181/124975/1577/1576/1800
R-HSA-5579029	Metabolic disorders of biological oxidation enzymes	31	-0.716707	-1.51124	0.0108578	0.102149	1956	tags=29%, list=11%, signal=26%	1591/1583/1588/1589/126410/1586/54658/2328/4143
R-HSA-5689901	Metalloprotease DUBs	28	0.561388	1.84994	0.0113636	0.103221	3893	tags=43%, list=21%, signal=34%	3012/8850/3013/92815/8336/8334/8969/8027/672/7311/7314/29086
R-HSA-72086	mRNA Capping	29	0.54594	1.84923	0.0113636	0.103221	5924	tags=59%, list=32%, signal=40%	5435/2068/5434/5441/2962/6829/2968/8731/5430/902/8732/2966/2071/5436/2965/2963/5433
R-HSA-76071	RNA Polymerase III Transcription Initiation From Type 3 Promoter	28	0.557483	1.83707	0.0113636	0.103221	2976	tags=29%, list=16%, signal=24%	5435/10622/6618/661/5434/171568/5441/6621
R-HSA-76061	RNA Polymerase III Transcription Initiation From Type 1 Promoter	28	0.579056	1.90816	0.0113636	0.103221	2865	tags=29%, list=16%, signal=24%	5435/10622/661/2975/5434/171568/9328/5441
R-HSA-73621	Pyrimidine catabolism	10	-0.849082	-1.53243	0.0115385	0.103242	862	tags=30%, list=5%, signal=29%	151531/1807/51733
R-HSA-2022377	Metabolism of Angiotensinogen to Angiotensins	18	-0.76407	-1.52542	0.0117096	0.103242	1416	tags=39%, list=8%, signal=36%	1215/59272/5972/1066/183/1361/1360
R-HSA-167238	Pausing and recovery of Tat-mediated HIV elongation	30	0.572649	1.95981	0.0120482	0.103242	4059	tags=37%, list=22%, signal=29%	5435/5434/9150/6924/5441/2962/6829/25920/7936/6749/5430
R-HSA-167243	Tat-mediated HIV elongation arrest and recovery	30	0.572649	1.95981	0.0120482	0.103242	4059	tags=37%, list=22%, signal=29%	5435/5434/9150/6924/5441/2962/6829/25920/7936/6749/5430
R-HSA-180786	Extension of Telomeres	30	0.53606	1.83459	0.0120482	0.103242	5500	tags=57%, list=30%, signal=40%	5558/2237/55135/5425/3978/5424/57804/6117/10856/8607/5426/5983/23649/56655/6118/55651/5984
R-HSA-5654720	PI-3K cascade:FGFR4	14	-0.797198	-1.52026	0.0120482	0.103242	3027	tags=71%, list=16%, signal=60%	2247/8822/5295/10818/2264/8817/2254/2246/9965/152831
R-HSA-421270	Cell-cell junction organization	60	-0.641488	-1.41361	0.0122951	0.103242	3620	tags=43%, list=20%, signal=35%	50848/24146/1003/1364/1005/84612/1365/49861/1009/9071/23562/1006/5010/1010/1015/9075/9080/1004/1008/1002/57863/283/149461/9074/51208/10686
R-HSA-73863	RNA Polymerase I Transcription Termination	31	0.553408	1.90919	0.0123457	0.103242	5715	tags=55%, list=31%, signal=38%	5435/2068/5434/9013/5441/2968/221830/25885/902/7343/9533/2966/7270/2071/9014/64425/2965
R-HSA-8949613	Cristae formation	31	0.540958	1.86624	0.0123457	0.103242	4403	tags=35%, list=24%, signal=27%	84303/25813/516/440574/513/498/125988/55735/506/8834/54927
R-HSA-202433	Generation of second messenger molecules	31	0.610058	2.10462	0.0123457	0.103242	2887	tags=71%, list=16%, signal=60%	3932/3123/915/7535/919/916/9402/3117/917/7454/3115/3127/3119/3118/3702/3113/3937/3122/5335/27040/3120/2533
R-HSA-167287	HIV elongation arrest and recovery	32	0.529902	1.79168	0.0131579	0.106372	4059	tags=34%, list=22%, signal=27%	5435/5434/9150/6924/5441/2962/6829/25920/7936/6749/5430
R-HSA-167290	Pausing and recovery of HIV elongation	32	0.529902	1.79168	0.0131579	0.106372	4059	tags=34%, list=22%, signal=27%	5435/5434/9150/6924/5441/2962/6829/25920/7936/6749/5430
R-HSA-68962	Activation of the pre-replicative complex	32	0.630712	2.13253	0.0131579	0.106372	5234	tags=69%, list=28%, signal=49%	1017/5558/8318/4174/4998/990/81620/5001/8317/51053/4176/4172/6117/23594/4171/55388/84515/5426/4175/23649/56655/6118
R-HSA-69190	DNA strand elongation	32	0.611506	2.0676	0.0131579	0.106372	5722	tags=66%, list=31%, signal=45%	5558/8318/4174/2237/5425/3978/5424/57804/4176/4172/6117/4171/51659/84515/84296/4175/5983/23649/6118/5984/64785
R-HSA-3906995	Diseases associated with O-glycosylation of proteins	66	-0.632418	-1.40611	0.0132248	0.106372	3168	tags=44%, list=17%, signal=36%	143662/23145/11096/4582/81794/57188/9719/170691/81792/11174/7057/171019/11095/727897/4588/170690/157869/4584/54437/10418/4586/170689/170692/79875/394263/94025/140453/10071/118430
R-HSA-2404192	Signaling by Type 1 Insulin-like Growth Factor 1 Receptor (IGF1R)	45	-0.66089	-1.43977	0.0135558	0.108185	2738	tags=42%, list=15%, signal=36%	2252/3480/2247/8822/5295/10818/2264/2261/2263/9365/8817/2322/2254/2246/8483/9965/2255/152831/3481
R-HSA-5576892	Phase 0 - rapid depolarisation	40	-0.674142	-1.45946	0.0136555	0.108185	4076	tags=60%, list=22%, signal=47%	6330/2256/785/93589/783/776/6326/815/775/6329/6331/778/59283/55799/6327/11280/9254/27092/2259/55800/786/6323/6328/59285
R-HSA-2453864	Retinoid cycle disease events	10	-0.837763	-1.512	0.0141026	0.109262	821	tags=40%, list=4%, signal=38%	5947/24/7276/5950
R-HSA-2474795	Diseases associated with visual transduction	10	-0.837763	-1.512	0.0141026	0.109262	821	tags=40%, list=4%, signal=38%	5947/24/7276/5950
R-HSA-211958	Miscellaneous substrates	10	-0.83908	-1.51438	0.0141026	0.109262	953	tags=70%, list=5%, signal=66%	4051/1580/126410/54905/8529/1565/1579
R-HSA-113418	Formation of the Early Elongation Complex	33	0.540389	1.8587	0.0147059	0.112285	4183	tags=36%, list=23%, signal=28%	5435/2068/5434/9150/5441/2962/6829/2968/25920/7936/5430/902
R-HSA-167158	Formation of the HIV-1 Early Elongation Complex	33	0.540389	1.8587	0.0147059	0.112285	4183	tags=36%, list=23%, signal=28%	5435/2068/5434/9150/5441/2962/6829/2968/25920/7936/5430/902
R-HSA-425393	Transport of inorganic cations/anions and amino acids/oligopeptides	98	-0.593635	-1.34053	0.0150602	0.11392	1853	tags=30%, list=10%, signal=27%	389015/6564/81539/57419/6543/57030/6539/6550/6519/6542/6528/115019/9498/6547/115111/6511/11136/6512/6507/83733/57282/25769/56301/160728/6557/1811/55089/6506/10991
R-HSA-373080	Class B/2 (Secretin family receptors)	81	-0.608895	-1.3641	0.0151362	0.11392	3592	tags=48%, list=20%, signal=39%	8321/2535/10268/10203/7473/799/2696/6469/10266/8643/11211/80326/7483/8325/7482/7481/1393/54361/5745/51384/1395/89780/5744/9340/7475/7434/2785/1394/6343/2740/116/3549/797/7476/6344/7432/796/2642/117
R-HSA-5654733	Negative regulation of FGFR4 signaling	25	-0.723554	-1.48908	0.0155211	0.115942	3027	tags=36%, list=16%, signal=30%	2247/8822/10818/2264/8817/2254/2246/9965/152831
R-HSA-176974	Unwinding of DNA	12	0.67475	1.7588	0.015625	0.115942	4875	tags=75%, list=27%, signal=55%	8318/4174/4176/4172/4171/51659/84515/84296/4175
R-HSA-446728	Cell junction organization	87	-0.60048	-1.35047	0.0161128	0.116823	3883	tags=40%, list=21%, signal=32%	3852/3918/253559/3914/50848/24146/3691/1003/1364/2318/1005/84612/1365/9459/49861/1009/9071/1308/23562/1006/5010/1010/1015/9075/9080/1004/1008/1002/3861/57863/283/149461/9074/51208/10686
R-HSA-171306	Packaging Of Telomere Ends	36	0.76264	2.60974	0.016129	0.116823	1742	tags=58%, list=9%, signal=53%	8339/3012/8347/55766/8367/8365/8343/8970/8349/85236/121504/8341/8294/3013/8370/8360/3015/3017/8334/65057/8344
R-HSA-76046	RNA Polymerase III Transcription Initiation	36	0.554422	1.89722	0.016129	0.116823	2976	tags=28%, list=16%, signal=23%	5435/10622/6618/661/2975/5434/171568/9328/5441/6621
R-HSA-5694530	Cargo concentration in the ER	32	-0.696839	-1.4762	0.0161987	0.116823	1945	tags=19%, list=11%, signal=17%	254263/374/2348/2153/5265/2890
R-HSA-3000480	Scavenging by Class A Receptors	19	-0.751079	-1.50239	0.016298	0.116823	2994	tags=47%, list=16%, signal=40%	1277/5648/1281/348/1278/78989/117156/338/335
R-HSA-176187	Activation of ATR in response to replication stress	37	0.566494	1.95115	0.0175439	0.124065	4983	tags=54%, list=27%, signal=39%	1017/8318/63967/4174/4998/990/993/5001/8317/4176/4172/6117/23594/4171/55388/84515/1111/4175/5983/5883
R-HSA-3214842	HDMs demethylate histones	37	0.53289	1.83541	0.0175439	0.124065	1297	tags=27%, list=7%, signal=25%	8367/8365/8351/8284/121504/7404/8294/8370/8360/8357
R-HSA-432142	Platelet sensitization by LDL	17	-0.760071	-1.49635	0.0177515	0.124696	19	tags=18%, list=0%, signal=18%	5525/5175/338
R-HSA-1500931	Cell-Cell communication	123	-0.575444	-1.30697	0.018	0.124903	3883	tags=36%, list=21%, signal=28%	9863/3852/3918/253559/3914/50848/24146/3691/1003/1364/2318/1005/84612/1365/5295/9459/49861/84623/1009/9071/4868/1308/23562/1006/5010/1010/84063/88/1015/9075/9080/1004/1008/1002/3861/57863/6441/283/149461/729238/9074/51208/653509/10686
R-HSA-73980	RNA Polymerase III Transcription Termination	23	0.522462	1.59623	0.018018	0.124903	1918	tags=22%, list=10%, signal=19%	5435/10622/661/5434/171568
R-HSA-429958	mRNA decay by 3' to 5' exoribonuclease	16	0.596913	1.6787	0.0185185	0.126493	5264	tags=69%, list=29%, signal=49%	28960/54512/6499/115024/56915/5393/23016/118460/23404/80349/10767
R-HSA-2428928	IRS-related events triggered by IGF1R	43	-0.654522	-1.42359	0.0187891	0.126493	3483	tags=42%, list=19%, signal=34%	2252/3480/2247/8822/5295/10818/2264/2261/2263/9365/8817/2322/2254/2246/9965/2255/152831/3481
R-HSA-110373	Resolution of AP sites via the multiple-nucleotide patch replacement pathway	26	0.505336	1.62754	0.0188679	0.126493	5500	tags=50%, list=30%, signal=35%	2237/5425/3978/5424/57804/54936/6117/5426/5983/670/56655/6118/5984
R-HSA-5576893	Phase 2 - plateau phase	22	-0.731875	-1.48067	0.0191657	0.126493	4476	tags=86%, list=24%, signal=65%	10008/782/9992/785/93589/3753/783/776/775/3784/778/59283/55799/9254/27092/23630/786/23704/59285
R-HSA-186712	Regulation of beta-cell development	35	-0.681554	-1.46093	0.0192102	0.126493	2842	tags=43%, list=15%, signal=36%	3170/6927/3175/2494/3171/3651/222546/3172/2645/389692/4821/390874/3642/2255/5313
R-HSA-197264	Nicotinamide salvaging	18	-0.752201	-1.50172	0.0199063	0.126493	530	tags=17%, list=3%, signal=16%	5743/160728/1582
R-HSA-73933	Resolution of Abasic Sites (AP sites)	39	0.473018	1.64358	0.02	0.126493	6227	tags=59%, list=34%, signal=39%	2237/252969/11284/5425/3978/5424/4350/57804/54936/3980/6117/4968/5426/5983/670/56655/6118/4595/5984/23583/5982/7515/5981
R-HSA-6783310	Fanconi Anemia Pathway	38	0.508118	1.76262	0.02	0.126493	4660	tags=50%, list=25%, signal=37%	353497/201254/199990/2175/2177/2067/146956/6117/7311/100526739/2187/91442/7314/84464/55215/2189/64858/378708/80198
R-HSA-110330	Recognition and association of DNA glycosylase with site containing an affected purine	40	0.735731	2.57924	0.02	0.126493	1742	tags=52%, list=9%, signal=48%	8339/3012/8347/55766/8367/8365/8343/8970/8349/85236/121504/8341/8294/3013/8370/8360/3015/3017/8334/65057/8344
R-HSA-110331	Cleavage of the damaged purine	40	0.735731	2.57924	0.02	0.126493	1742	tags=52%, list=9%, signal=48%	8339/3012/8347/55766/8367/8365/8343/8970/8349/85236/121504/8341/8294/3013/8370/8360/3015/3017/8334/65057/8344
R-HSA-73728	RNA Polymerase I Promoter Opening	40	0.719363	2.52185	0.02	0.126493	1837	tags=57%, list=10%, signal=52%	8339/3012/8347/55766/8367/8365/8343/8351/8970/8349/85236/121504/8341/8294/3013/8370/8360/3015/8357/3017/8334/8344/8353
R-HSA-73927	Depurination	40	0.735731	2.57924	0.02	0.126493	1742	tags=52%, list=9%, signal=48%	8339/3012/8347/55766/8367/8365/8343/8970/8349/85236/121504/8341/8294/3013/8370/8360/3015/3017/8334/65057/8344
R-HSA-110313	Translesion synthesis by Y family DNA polymerases bypasses lesions on DNA template	39	0.446696	1.55212	0.02	0.126493	5500	tags=54%, list=30%, signal=38%	10459/5425/5424/57804/124739/7353/6117/7311/7314/25898/55666/9768/5426/5980/5429/5983/9246/56655/6118/9100/5984
R-HSA-6802948	Signaling by high-kinase activity BRAF mutants	36	-0.68013	-1.45947	0.0202128	0.126493	159	tags=11%, list=1%, signal=11%	283455/2266/2244/2243
R-HSA-5696400	Dual Incision in GG-NER	41	0.462468	1.65157	0.0204082	0.126493	5949	tags=54%, list=32%, signal=36%	2068/5425/5424/57804/2067/6117/7311/2968/7314/1643/1642/9557/9978/5426/5983/2966/56655/2071/6118/5984/2965/5982
R-HSA-5334118	DNA methylation	41	0.721429	2.57637	0.0204082	0.126493	1837	tags=56%, list=10%, signal=51%	8339/3012/8347/55766/8367/8365/8343/8351/8970/8349/85236/121504/8341/8294/3013/8370/8360/3015/8357/3017/8334/8344/8353
R-HSA-74158	RNA Polymerase III Transcription	41	0.483948	1.72828	0.0204082	0.126493	2976	tags=24%, list=16%, signal=20%	5435/10622/6618/661/2975/5434/171568/9328/5441/6621
R-HSA-749476	RNA Polymerase III Abortive And Retractive Initiation	41	0.483948	1.72828	0.0204082	0.126493	2976	tags=24%, list=16%, signal=20%	5435/10622/6618/661/2975/5434/171568/9328/5441/6621
R-HSA-5619115	Disorders of transmembrane transporters	159	-0.560211	-1.27474	0.020979	0.128647	1490	tags=18%, list=8%, signal=17%	6505/21/6531/26154/6559/56606/3767/552/6523/30061/9843/6519/6528/2645/1080/6530/368/11136/6507/5244/6833/6557/2646/64240/1811/8647/213/64241/335
R-HSA-1474228	Degradation of the extracellular matrix	134	-0.563359	-1.27928	0.021	0.128647	3349	tags=41%, list=18%, signal=34%	1303/1511/1295/1515/1289/1277/11096/7093/1287/1293/1302/84570/1281/1305/176/1634/1288/7373/91522/5654/7092/2200/1278/1290/147968/84467/11095/1308/388743/1299/92291/2006/1301/84290/440854/10753/1296/4316/1215/170690/4320/80274/1300/170692/1297/827/5650/63827/4322/5644/4319/1280/5645/3818/164656
R-HSA-71288	Creatine metabolism	11	-0.808185	-1.47381	0.0214106	0.128826	1607	tags=45%, list=9%, signal=42%	6539/6534/1160/1158/2628
R-HSA-167169	HIV Transcription Elongation	42	0.508494	1.77796	0.0217391	0.128826	4183	tags=33%, list=23%, signal=26%	5435/2068/5434/9150/6924/5441/2962/6829/2968/25920/7936/6749/5430/902
R-HSA-167200	Formation of HIV-1 elongation complex containing HIV-1 Tat	42	0.508494	1.77796	0.0217391	0.128826	4183	tags=33%, list=23%, signal=26%	5435/2068/5434/9150/6924/5441/2962/6829/2968/25920/7936/6749/5430/902
R-HSA-167246	Tat-mediated elongation of the HIV-1 transcript	42	0.508494	1.77796	0.0217391	0.128826	4183	tags=33%, list=23%, signal=26%	5435/2068/5434/9150/6924/5441/2962/6829/2968/25920/7936/6749/5430/902
R-HSA-379724	tRNA Aminoacylation	42	0.500479	1.74994	0.0217391	0.128826	5377	tags=50%, list=29%, signal=35%	7453/7407/57505/57176/2193/3735/16/9521/3035/5859/23395/8565/833/4141/6301/2617/10667/3376/79587/4677/7965
R-HSA-390522	Striated Muscle Contraction	30	-0.695819	-1.4636	0.0217628	0.128826	1965	tags=47%, list=11%, signal=42%	8557/7134/7139/7273/7135/88/4703/7136/4634/7125/4606/70/7140/58
R-HSA-2428924	IGF1R signaling cascade	44	-0.650298	-1.41542	0.0219436	0.12912	3483	tags=41%, list=19%, signal=33%	2252/3480/2247/8822/5295/10818/2264/2261/2263/9365/8817/2322/2254/2246/9965/2255/152831/3481
R-HSA-167152	Formation of HIV elongation complex in the absence of HIV Tat	44	0.476673	1.73998	0.0222222	0.12912	4183	tags=32%, list=23%, signal=25%	5435/2068/5434/9150/6924/5441/2962/6829/2968/25920/7936/6749/5430/902
R-HSA-5625886	Activated PKN1 stimulates transcription of AR (androgen receptor) regulated genes KLK2 and KLK3	44	0.728946	2.66084	0.0222222	0.12912	1837	tags=59%, list=10%, signal=53%	3817/354/8339/3012/8347/55766/8367/8365/8343/8351/8970/8349/85236/121504/8341/8294/3013/8370/8360/3015/5585/8357/3017/8334/8344/8353
R-HSA-8868766	rRNA processing in the mitochondrion	10	0.713624	1.79306	0.0225225	0.12912	4816	tags=80%, list=26%, signal=59%	55178/9692/60528/79922/3028/130916/51106/29960
R-HSA-8854214	TBC/RABGAPs	43	0.554233	1.96197	0.0227273	0.12912	2590	tags=28%, list=14%, signal=24%	51256/125058/51560/84958/374403/26088/11337/54662/51762/27342/57533/729873
R-HSA-168325	Viral Messenger RNA Synthesis	43	0.485142	1.71739	0.0227273	0.12912	6815	tags=65%, list=37%, signal=41%	5435/9688/5434/6396/23511/5441/2962/10762/5430/9883/23225/23165/8021/23636/5436/81929/348995/2963/5433/8086/4928/55706/4927/79023/5903/9631/5431/9972
R-HSA-110328	Recognition and association of DNA glycosylase with site containing an affected pyrimidine	45	0.73117	2.68425	0.0232558	0.12912	1742	tags=49%, list=9%, signal=44%	8339/3012/8347/55766/8367/8365/8343/8970/8349/85236/121504/8341/8294/3013/8370/8360/3015/3017/252969/8334/65057/8344
R-HSA-110329	Cleavage of the damaged pyrimidine	45	0.73117	2.68425	0.0232558	0.12912	1742	tags=49%, list=9%, signal=44%	8339/3012/8347/55766/8367/8365/8343/8970/8349/85236/121504/8341/8294/3013/8370/8360/3015/3017/252969/8334/65057/8344
R-HSA-427359	SIRT1 negatively regulates rRNA expression	45	0.710355	2.60783	0.0232558	0.12912	1858	tags=53%, list=10%, signal=48%	8339/3012/8347/55766/8367/8365/8343/8351/8970/8349/85236/121504/8341/8294/3013/8370/8360/3015/8357/3017/8334/8344/8353/9013
R-HSA-73928	Depyrimidination	45	0.73117	2.68425	0.0232558	0.12912	1742	tags=49%, list=9%, signal=44%	8339/3012/8347/55766/8367/8365/8343/8970/8349/85236/121504/8341/8294/3013/8370/8360/3015/3017/252969/8334/65057/8344
R-HSA-5358565	Mismatch repair (MMR) directed by MSH2:MSH6 (MutSalpha)	14	0.652912	1.7814	0.0232558	0.12912	3761	tags=50%, list=20%, signal=40%	5425/3978/5424/57804/4292/6117/9156
R-HSA-163560	Triglyceride catabolism	19	-0.73832	-1.47687	0.0232829	0.12912	410	tags=21%, list=2%, signal=21%	2172/2173/5346/2168
R-HSA-383280	Nuclear Receptor transcription pathway	50	-0.64798	-1.42063	0.0236869	0.130673	2547	tags=30%, list=14%, signal=26%	7421/5914/2103/2494/367/10002/3172/2104/8856/7101/2099/8431/5241/9970/9971
R-HSA-5654716	Downstream signaling of activated FGFR4	21	-0.733117	-1.47957	0.0239453	0.130876	3027	tags=48%, list=16%, signal=40%	2247/8822/5295/10818/2264/8817/2254/2246/9965/152831
R-HSA-174414	Processive synthesis on the C-strand of the telomere	11	0.705467	1.78266	0.0240385	0.130876	3149	tags=55%, list=17%, signal=45%	2237/5425/3978/5424/57804/6117
R-HSA-5358508	Mismatch Repair	15	0.592599	1.63218	0.0240964	0.130876	3761	tags=47%, list=20%, signal=37%	5425/3978/5424/57804/4292/6117/9156
R-HSA-163125	Post-translational modification: synthesis of GPI-anchored proteins	85	-0.594888	-1.33616	0.0252016	0.135528	2414	tags=29%, list=13%, signal=26%	7070/53942/1048/154064/152330/116372/420/130576/249/646627/8581/257194/55350/2822/23627/8000/8876/4062/80740/1087/4978/251/137797/2813/7512
R-HSA-5674135	MAP2K and MAPK activation	40	-0.656223	-1.42067	0.0252101	0.135528	159	tags=12%, list=1%, signal=12%	54756/283455/2266/2244/2243
R-HSA-432047	Passive transport by Aquaporins	10	-0.810659	-1.46308	0.025641	0.137145	2439	tags=70%, list=13%, signal=61%	362/359/364/358/363/366/361
R-HSA-977068	Termination of O-glycan biosynthesis	22	-0.722585	-1.46187	0.0259301	0.137953	1438	tags=41%, list=8%, signal=38%	727897/4588/4584/4586/394263/94025/140453/10071/118430
R-HSA-381038	XBP1(S) activates chaperone genes	47	0.599695	2.16456	0.0263158	0.137953	4860	tags=70%, list=26%, signal=52%	2134/55062/1200/7709/10525/56005/30827/9114/4000/2135/11015/10954/55738/64061/9695/55033/9820/5611/2137/6734/1639/9797/58477/84447/10897/6464/10113/10130/5526/2673/118/9570/1663
R-HSA-73929	Base-Excision Repair, AP Site Formation	47	0.715225	2.58155	0.0263158	0.137953	1742	tags=47%, list=9%, signal=42%	8339/3012/8347/55766/8367/8365/8343/8970/8349/85236/121504/8341/8294/3013/8370/8360/3015/3017/252969/8334/65057/8344
R-HSA-2173789	TGF-beta receptor signaling activates SMADs	32	0.48332	1.63418	0.0263158	0.137953	5498	tags=47%, list=30%, signal=33%	23327/56937/25805/9040/5045/23645/10273/7311/7314/5499/4089/867/2280/4087/9372
R-HSA-203927	MicroRNA (miRNA) biogenesis	24	0.500164	1.55273	0.0277778	0.144896	4059	tags=29%, list=22%, signal=23%	5435/5434/6895/5441/26523/57510/5430
R-HSA-2173788	Downregulation of TGF-beta receptor signaling	26	0.478487	1.54106	0.0283019	0.145738	4158	tags=31%, list=23%, signal=24%	23327/56937/25805/23645/10273/7311/7314/5499
R-HSA-211733	Regulation of activated PAK-2p34 by proteasome mediated degradation	48	0.494145	1.77664	0.0285714	0.145738	5790	tags=56%, list=31%, signal=39%	5698/5699/5695/5721/5694/5714/5715/5719/7311/5685/5702/7314/5708/5691/5692/5696/5705/5693/10197/5690/5720/5709/5717/5686/9861/5713/7979
R-HSA-168274	Export of Viral Ribonucleoproteins from Nucleus	33	0.453141	1.5586	0.0294118	0.145738	6815	tags=67%, list=37%, signal=42%	9688/3303/6396/23511/3304/10762/9883/23225/23165/8021/23636/5901/81929/348995/8086/4928/55706/4927/79023/5903/9631/9972
R-HSA-180746	Nuclear import of Rev protein	33	0.44306	1.52393	0.0294118	0.145738	6815	tags=70%, list=37%, signal=44%	9688/6396/23511/3837/10762/9883/23225/23165/8021/23636/5901/81929/348995/4869/8086/4928/55706/4927/79023/5903/1104/9631/9972
R-HSA-198725	Nuclear Events (kinase and transcription factor activation)	25	0.478001	1.51018	0.03	0.145738	4104	tags=44%, list=22%, signal=34%	1846/5600/6196/1845/5528/6197/1848/6195/5598/5594/5518
R-HSA-180585	Vif-mediated degradation of APOBEC3G	52	0.495788	1.81437	0.030303	0.145738	5790	tags=56%, list=31%, signal=38%	5698/5699/5695/5721/5694/5714/5715/60489/5719/7311/5685/5702/7314/5708/5691/5692/5696/5705/5693/10197/5690/9978/5720/5709/5717/5686/9861/5713/7979
R-HSA-8854050	FBXL7 down-regulates AURKA during mitotic entry and in early mitosis	52	0.475912	1.74164	0.030303	0.145738	5790	tags=56%, list=31%, signal=38%	5698/5699/5695/5721/5694/5714/5715/5719/7311/5685/5702/7314/5708/5691/5692/6790/5696/5705/5693/10197/5690/9978/5720/5709/5717/5686/9861/5713/7979
R-HSA-165054	Rev-mediated nuclear export of HIV RNA	34	0.441961	1.53481	0.030303	0.145738	6815	tags=68%, list=37%, signal=43%	9688/6396/23511/5905/5902/10762/9883/23225/23165/8021/23636/5901/81929/348995/8086/4928/55706/4927/79023/5903/1104/9631/9972
R-HSA-2022090	Assembly of collagen fibrils and other multimeric structures	60	-0.624054	-1.3752	0.0307377	0.145738	4331	tags=57%, list=24%, signal=43%	1298/3909/4015/3918/131873/3914/3691/1303/1295/1515/1289/7837/1277/7093/85301/1287/1293/1302/1281/1288/7373/7092/1278/1290/4016/1308/1299/1301/1296/4316/1300/1297/4322/1280
R-HSA-3301854	Nuclear Pore Complex (NPC) Disassembly	35	0.408046	1.41271	0.0307692	0.145738	6815	tags=66%, list=37%, signal=41%	9688/6396/891/23511/10762/9133/9883/23225/23165/8021/23636/81929/348995/8086/10783/4928/91754/55706/4927/79023/5903/9631/9972
R-HSA-381070	IRE1alpha activates chaperones	49	0.598841	2.11195	0.03125	0.145738	4860	tags=69%, list=26%, signal=51%	2134/55062/1200/7709/10525/56005/30827/9114/4000/2135/11015/10954/55738/64061/9695/55033/9820/5611/2137/6734/1639/9797/58477/84447/10897/6464/3309/10113/10130/5526/2673/118/9570/1663
R-HSA-169911	Regulation of Apoptosis	51	0.483801	1.78008	0.03125	0.145738	5790	tags=55%, list=31%, signal=38%	5698/5699/5695/5721/5694/5714/5715/5719/7311/5685/5702/7314/5708/5691/5692/5696/79658/5705/5693/10197/5690/5720/5709/5717/5686/9861/5713/7979
R-HSA-350562	Regulation of ornithine decarboxylase (ODC)	49	0.485419	1.71194	0.03125	0.145738	6070	tags=61%, list=33%, signal=41%	51686/5698/4953/5699/5695/5721/5694/5714/5715/5719/4946/5685/5702/5708/5691/5692/5696/5705/5693/10197/5690/5720/5709/5717/5686/9861/5713/7979/5701/4947
R-HSA-174437	Removal of the Flap Intermediate from the C-strand	10	0.684345	1.7195	0.0315315	0.145738	3149	tags=50%, list=17%, signal=41%	2237/5425/5424/57804/6117
R-HSA-77286	mitochondrial fatty acid beta-oxidation of saturated fatty acids	10	0.680339	1.70943	0.0315315	0.145738	3389	tags=50%, list=18%, signal=41%	33/6296/1892/3030/3032
R-HSA-389513	CTLA4 inhibitory signaling	21	0.526023	1.591	0.032	0.145738	637	tags=14%, list=3%, signal=14%	10000/3932/1493
R-HSA-2299718	Condensation of Prophase Chromosomes	50	0.70143	2.51043	0.0322581	0.145738	1837	tags=50%, list=10%, signal=45%	23310/8339/3012/8347/55766/8367/8365/8343/8351/8970/8349/85236/121504/8341/8294/3013/8370/29781/8360/3015/8357/3017/8334/8344/8353
R-HSA-75815	Ubiquitin-dependent degradation of Cyclin D	50	0.500319	1.79065	0.0322581	0.145738	5790	tags=54%, list=31%, signal=37%	5698/5699/5695/5721/5694/5714/5715/5719/7311/5685/5702/7314/5708/5691/5692/5696/5705/5693/10197/5690/5720/5709/5717/5686/9861/5713/7979
R-HSA-180534	Vpu mediated degradation of CD4	50	0.447767	1.60256	0.0322581	0.145738	5790	tags=54%, list=31%, signal=37%	5698/5699/5695/5721/5694/5714/5715/5719/7311/5685/5702/7314/5708/5691/5692/5696/5705/5693/10197/5690/5720/5709/5717/5686/9861/5713/7979
R-HSA-349425	Autodegradation of the E3 ubiquitin ligase COP1	50	0.468721	1.67756	0.0322581	0.145738	5790	tags=56%, list=31%, signal=38%	5698/5699/5695/5721/472/5694/5714/5715/5719/7311/5685/5702/7314/5708/5691/5692/5696/5705/5693/10197/5690/5720/5709/5717/5686/9861/5713/7979
R-HSA-69601	Ubiquitin Mediated Degradation of Phosphorylated Cdc25A	50	0.51453	1.84151	0.0322581	0.145738	5790	tags=58%, list=31%, signal=40%	5698/5699/5695/993/5721/5694/5714/5715/5719/7311/5685/5702/7314/5708/5691/5692/5696/5705/5693/10197/5690/1111/5720/5709/5717/5686/9861/5713/7979
R-HSA-69610	p53-Independent DNA Damage Response	50	0.51453	1.84151	0.0322581	0.145738	5790	tags=58%, list=31%, signal=40%	5698/5699/5695/993/5721/5694/5714/5715/5719/7311/5685/5702/7314/5708/5691/5692/5696/5705/5693/10197/5690/1111/5720/5709/5717/5686/9861/5713/7979
R-HSA-69613	p53-Independent G1/S DNA damage checkpoint	50	0.51453	1.84151	0.0322581	0.145738	5790	tags=58%, list=31%, signal=40%	5698/5699/5695/993/5721/5694/5714/5715/5719/7311/5685/5702/7314/5708/5691/5692/5696/5705/5693/10197/5690/1111/5720/5709/5717/5686/9861/5713/7979
R-HSA-212300	PRC2 methylates histones and DNA	50	0.707287	2.53139	0.0322581	0.145738	1837	tags=50%, list=10%, signal=45%	8339/3012/8347/55766/8367/8365/8343/8351/8970/8349/85236/121504/8341/8294/3013/8370/8360/3015/8357/3017/8334/26147/5252/8344/8353
R-HSA-177243	Interactions of Rev with host cellular proteins	36	0.454528	1.55538	0.0322581	0.145738	6654	tags=67%, list=36%, signal=43%	9688/6396/23511/5905/5902/3837/10762/9883/23225/23165/8021/23636/5901/81929/348995/4869/8086/4928/55706/4927/79023/5903/1104/9631
R-HSA-6794362	Protein-protein interactions at synapses	83	-0.592261	-1.32575	0.0323559	0.145738	2594	tags=31%, list=14%, signal=27%	58512/127833/5789/57502/2904/9379/91683/8825/50944/8499/6857/94030/2905/57497/26045/54413/2903/143425/84189/4916/9378/2892/2893/347730/22865/2890
R-HSA-5654719	SHC-mediated cascade:FGFR4	14	-0.778943	-1.48545	0.0325301	0.145738	3027	tags=57%, list=16%, signal=48%	2247/8822/2264/8817/2254/2246/9965/152831
[truncated: 81 more rows]
